# Supplementary material for: Mechanistic study on the side arm effect in a palladium/Xu-Phos-catalyzed enantioselective alkoxyalkenylation of γ-hydroxyalkenes
Source: PubMed Central journal article supplement (PMC10665319; doi:10.1038/s41467-023-43202-5), 2023-11-22
Supplement: 41467_2023_43202_MOESM1_ESM.pdf [file 41467_2023_43202_MOESM1_ESM.pdf]

# Supplementary Information for

## Mechanistic study on the side arm effect in a palladium/Xu-Phos-catalyzed enantioselective alkoxyalkenylation of $\gamma$ -hydroxyalkenes

Shuai Zhu<sup>1†</sup>, Zihao Ye<sup>2†</sup>, Ming-Jie Chen<sup>1†</sup>, Lei Wang<sup>3</sup>, Yu-Zhuo Wang<sup>1</sup>, Ke-Nan Zhang<sup>1</sup>, Wen-Bo Li<sup>1</sup>, Han-Ming Ding<sup>1</sup>, Zhi-Ming Li<sup>2\*</sup>, and Junliang Zhang<sup>1,2,3,4\*</sup>

<sup>1</sup>Shanghai Key Laboratory of Green Chemistry and Chemical Processes, School of Chemistry and Molecular Engineering, East China Normal University, 3663 N. Zhongshan Road, Shanghai 200062, P.R. China

<sup>2</sup>Department of Chemistry, Fudan University, 2005 Song hu Road, Shanghai 200438, P.R. China

<sup>3</sup>School of Chemistry & Chemical Engineering, Yangzhou University, Yangzhou 225002, China

<sup>4</sup>Henan Normal Univ, Sch Chem & Chem Engn, Xinxiang 453007, Henan, Peoples R China

\*Corresponding author. Email: [junliangzhang@fudan.edu.cn](mailto:junliangzhang@fudan.edu.cn) (J.Z.); [zmli@fudan.edu.cn](mailto:zmli@fudan.edu.cn) (Z.L.)

†These authors contributed equally to this work.

|                                                                                       |     |
|---------------------------------------------------------------------------------------|-----|
| 1. General Information: .....                                                         | 2   |
| 2. General Procedure for the Synthesis of Xu-Phos .....                               | 3   |
| 3. General procedure for preparation of substrates.....                               | 50  |
| 4. General Procedure and HPLC spectra .....                                           | 52  |
| 5. X-ray structure of Xu6 and 13.....                                                 | 126 |
| 6. Procedure of vibrational circular dichroism (VCD) experiment .....                 | 126 |
| 7. Computational details .....                                                        | 126 |
| 9. <sup>1</sup> H, <sup>13</sup> C, <sup>31</sup> P, <sup>19</sup> F NMR spectra..... | 138 |
| 9. References .....                                                                   | 309 |

## 1. General Information

Unless otherwise noted, all reactions were carried out under an argon atmosphere; materials obtained from commercial suppliers were used directly without further purification. The  $[\pm] D$  was recorded using PolAAr 3005 High Accuracy Polarimeter ( $\lambda = 589 \text{ nm}$ ,  $T = 20 \text{ }^\circ\text{C}$ ).  $^1\text{H}$  NMR spectra,  $^{13}\text{C}$  NMR spectra, and  $^{31}\text{P}$  NMR spectra were recorded on a Bruker 400 MHz and 500 MHz spectrometer in  $\text{CDCl}_3$  NMR. Experiments are reported in  $\delta$  units, parts per million (ppm), and were referenced to  $\text{CDCl}_3$  ( $\delta 7.26$  or  $77.0 \text{ ppm}$ ) as the internal standard. The data is being reported as (s = singlet, d = doublet, dd = doublet of doublet, t = triplet, m = multiplet or unresolved, br = broad signal, coupling constant(s) in Hz, integration). Tetrahydrofuran (THF), toluene, hexane and ether were dried with sodium benzophenone and distilled before use; Reactions were monitored by thin layer chromatography (TLC) using silicycle pre-coated silica gel plates. Flash column chromatography was performed on silica gel 60 (particle size 300-400 mesh ASTM, purchased from Yantai, China) and eluted with petroleum ether/ethyl acetate.

## 2. General Procedure for the Synthesis of Xu-Phos

### 2.1 Synthesis of Xu3, Xu11

#### 2.1.1 (*R*)-*N*-((*S*)-[1,1'-biphenyl]-4-yl(2-(dicyclohexylphosphanyl)-phenyl)-methyl)-*N*,2-dimethylpropane-2-sulfinamide (Xu3)

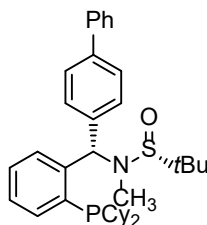

**Xu3**

To a solution of dicyclohexylphosphine borane (5 mmol) in dry PhMe/THF (2:1, 10 mL) was added *n*-BuLi (5 mmol, 2.4 M in hexane) dropwise under argon at -78 °C. The resulting solution at this temperature during 1 hour and 1,2-dibromobenzene (5 mmol) was added dropwise followed by *n*-BuLi (5 mmol, 2.4 M in hexane). After 10 minutes at -78 °C, (*R**s*)-sulfinyl imine (6 mmol) was added and the reaction mixture was warmed to room temperature overnight. The reaction mixture was cooled to 0 °C and added Methyl trifluoromethanesulfonate (7.5 mmol). The resulting solution was stirred at this temperature during 1 hour. Then, the reaction mixture was quenched by the addition of NaHCO<sub>3</sub> (aq.) and diluted with EtOAc. The organic layer was separated, and the aqueous layer was extracted twice with EtOAc. The combined organic layers were dried over Na<sub>2</sub>SO<sub>4</sub>, filtered, concentrated. The crude product was dealed with Et<sub>2</sub>NH (20 mL) and the resulting solution was stirred under argon at 50 °C. After the reaction was complete (monitored by TLC), solvent was removed under reduced pressure. The crude product was then purified by flash column chromatography on silica gel (Petroleum ether: Acetone = 30:1) to afford the product **Xu3** as a white solid (1.3 g, 45% yield). Mp: 68.4-70.2 °C. [ $\alpha$ ]<sub>D</sub><sup>20</sup> = 52.8 (*c* = 0.4, Chloroform). <sup>1</sup>H NMR (500 MHz, Chloroform-*d*)  $\delta$  7.84 – 7.74 (m, 1 H), 7.59 – 7.53 (m, 2 H), 7.54 – 7.45 (m, 3 H), 7.47 – 7.38 (m, 3 H), 7.35 – 7.29 (m, 2 H), 7.29 – 7.23 (m, 2 H), 6.94 (d, *J* = 10.0 Hz, 1 H), 2.64 (s, 3 H), 2.01 – 1.82 (m, 2 H), 1.83 – 1.72 (m, 1 H), 1.72 – 1.62 (m, 2 H), 1.62 – 1.57 (m, 1 H), 1.57 – 1.51 (m, 1 H), 1.51 – 1.39 (m, 4 H), 1.36 – 1.17 (m, 6 H), 1.15 – 1.06 (m, 10 H), 0.94 – 0.86 (m, 3 H), 0.65 – 0.51 (m, 1 H). <sup>13</sup>C NMR (125 MHz, Chloroform-*d*)  $\delta$  147.1 (d, *J* = 22.2 Hz), 140.7, 139.9, 139.1, 134.9 (d, *J* = 21.2 Hz), 133.1 (d, *J* = 3.2 Hz), 131.0, 128.7, 128.6, 128.0 (d, *J* = 4.9 Hz), 127.1, 126.9, 126.6, 69.8 (d, *J* = 31.8 Hz), 58.6, 34.7 (dd, *J* = 12.9, 10.8 Hz), 30.6 (d, *J* = 17.8

Hz), 30.3 – 29.8 (m), 29.5 (d,  $J = 10.0$  Hz), 29.3 (d,  $J = 10.0$  Hz), 27.0 (dd,  $J = 12.0, 9.7$  Hz), 26.3, 26.1, 24.0.  $^{31}\text{P}$  NMR (202 MHz, Chloroform- $d$ )  $\delta$  -16.85. HRMS (ESI) calculated for  $[\text{C}_{36}\text{H}_{49}\text{NOPS}]$   $[\text{M}+\text{H}]^+$ : 574.3267 found: 574.3269.

### 2.1.2 (*R*)-*N*-((*S*)-[1,1'-biphenyl]-4-yl(2-(dicyclohexylphosphanyl)-4,5-dimethoxy-phenyl)-methyl)-*N*,2-dimethylpropane-2-sulfinamide (**Xu11**)

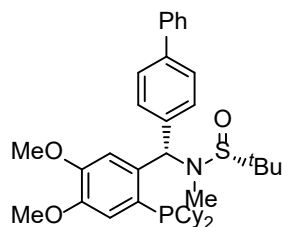

**Xu11**

To a solution of dicyclohexylphosphine borane (5 mmol) in dry PhMe/THF (2:1, 10 mL) was added *n*-BuLi (5 mmol, 2.4 M in hexane) dropwise under argon at  $-78$  °C. The resulting solution at this temperature during 1 hour and 1,2-dibromo-4,5-dimethoxybenzene (5 mmol) was added dropwise followed by *n*-BuLi (5 mmol, 2.4 M in hexane). After 10 minutes at  $-78$  °C, (*Rs*)-sulfinyl imine (6 mmol) was added and the reaction mixture was warmed to room temperature overnight. The reaction mixture was cooled to  $0$  °C and added Methyl trifluoromethanesulfonate (7.5 mmol). The resulting solution was stirred at this temperature during 1 hour. Then, the reaction mixture was quenched by the addition of  $\text{NaHCO}_3$  (aq.) and diluted with EtOAc. The organic layer was separated, and the aqueous layer was extracted twice with EtOAc. The combined organic layers were dried over  $\text{Na}_2\text{SO}_4$ , filtered, concentrated. The crude product was dealt with  $\text{Et}_2\text{NH}$  (20 mL) and the resulting solution was stirred under argon at  $50$  °C. After the reaction was complete (monitored by TLC), solvent was removed under reduced pressure. The crude product was then purified by flash column chromatography on silica gel (Petroleum ether : Acetone = 30:1) to afford the product **Xu11** as a white solid (1.4 g, 44% yield). Mp:  $75.6$ - $78$  °C.  $[\alpha]_{\text{D}}^{20} = 112.7$  ( $c = 0.4$ , Chloroform- $d$ ).  $^1\text{H}$  NMR (500 MHz, Chloroform- $d$ )  $\delta$  7.59 – 7.55 (m, 2H), 7.53 (d,  $J = 3.7$  Hz, 1H), 7.51 – 7.47 (m, 2H), 7.43 (t,  $J = 7.6$  Hz, 2H), 7.34 (t,  $J = 7.4$  Hz, 1H), 7.29 (d,  $J = 2.6$  Hz, 2H), 6.98 (d,  $J = 2.2$  Hz, 1H), 6.83 (d,  $J = 10.3$  Hz, 1H), 4.00 (s, 3H), 3.93 (s, 3H), 2.67 (s, 3H), 1.96 – 1.79 (m, 4H), 1.73 – 1.65 (m, 2H), 1.58 – 1.47 (m, 4H), 1.47 – 1.38 (m, 3H), 1.35 – 1.16 (m, 7H), 1.12 (s, 9H), 0.92 – 0.87 (m, 2H).  $^{13}\text{C}$  NMR (125 MHz, Chloroform- $d$ )  $\delta$  149.8, 147.2, 140.7, 140.1 (d,  $J$

= 23.0 Hz), 139.9, 139.4, 131.3, 128.6, 127.1, 126.9, 126.4, 125.8 (d,  $J = 20.1$  Hz), 115.1 (d,  $J = 2.9$  Hz), 111.1 (d,  $J = 5.6$  Hz), 69.9 (d,  $J = 33.1$  Hz), 58.7, 56.0, 55.9, 35.0 (dd,  $J = 12.6, 8.3$  Hz), 31.0 – 30.4 (m), 30.1 (d,  $J = 15.6$  Hz), 229.4 (dd,  $J = 11.4, 9.4$  Hz), 27.3–26.7 (m), 26.3, 26.1, 24.3.  $^{31}\text{P}$  NMR (202 MHz, Chloroform- $d$ )  $\delta$  -17.3. HRMS (ESI) calculated for  $[\text{C}_{38}\text{H}_{53}\text{NO}_3\text{PS}]$   $[\text{M}+\text{H}]^+$ : 634.3478 found: 634.3483.

## 2.2 Synthesis of Xu5, Xu6 and Xu7<sup>1</sup>

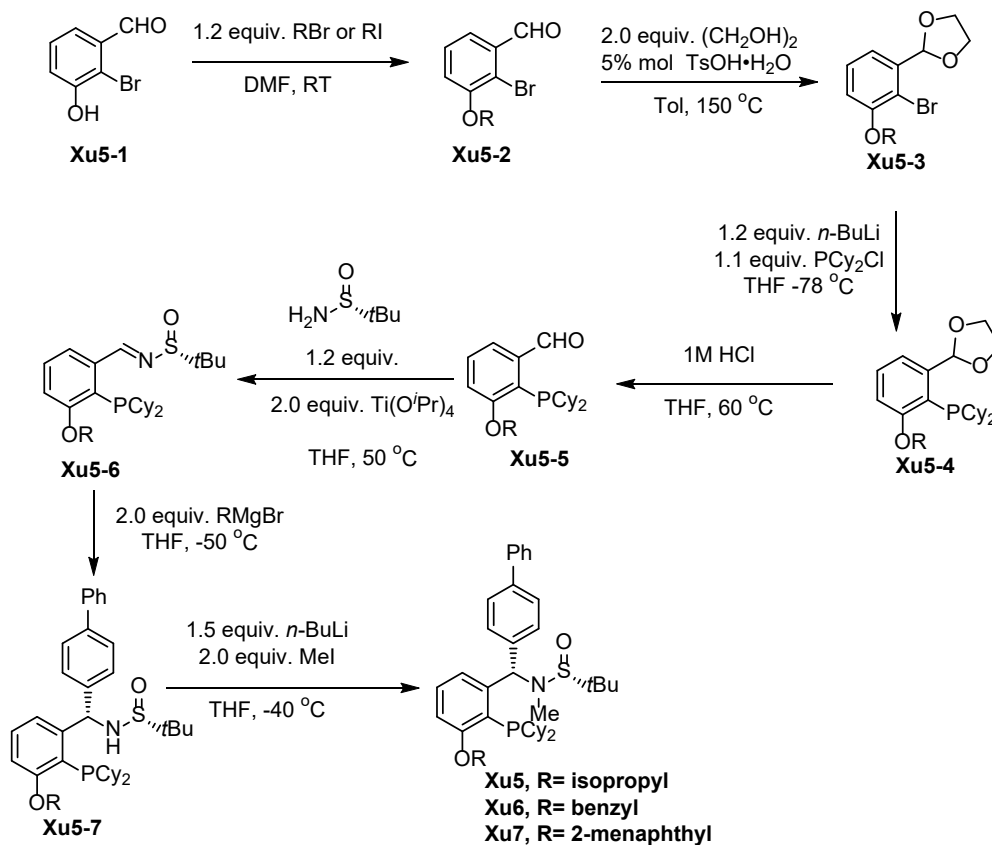

### 2.2.1 2-bromo-3-isopropoxybenzaldehyde (Xu5-2)

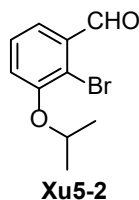

Prepared from 2-bromo-3-hydroxybenzaldehyde **Xu5-1** (30 mmol) in DMF (50 mL) was added 2-iodopropane (36mmol, 1.2 equiv.) and K<sub>2</sub>CO<sub>3</sub> (45 mmol, 1.5 equiv.). The resulting solution was stirred at room temperature overnight. The reaction mixture was quenched by the addition of H<sub>2</sub>O

and diluted with EtOAc. The organic layer was separated, and the aqueous layer was extracted twice with EtOAc. The combined organic layers were dried over Na<sub>2</sub>SO<sub>4</sub>, filtered, concentrated. The crude product was then purified by flash column chromatography on silica gel (petroleum ether: ethyl acetate = 40: 1) to afford the product **Xu5-2** as a white liquid (5.5 g, 75% yield). <sup>1</sup>H NMR (500 MHz, Chloroform-*d*) δ 10.42 (s, 1 H), 7.49 (d, *J* = 7.7 Hz, 1 H), 7.32 (t, *J* = 7.9 Hz, 1 H), 7.13 (d, *J* = 8.1 Hz, 1 H), 4.65 – 4.53 (m, 1 H), 1.40 (d, *J* = 6.1 Hz, 6 H) ppm. <sup>13</sup>C NMR (125 MHz, Chloroform-*d*) δ 192.4, 154.9, 134.9, 128.0, 121.4, 120.4, 118.9, 72.6, 21.9. HRMS (ESI) calculated for [C<sub>10</sub>H<sub>12</sub>BrO<sub>2</sub>] [M+H]<sup>+</sup>: 243.0015 found: 243.0017.

### 2.2.2 3-(benzyloxy)-2-bromobenzaldehyde (**Xu6-2**)

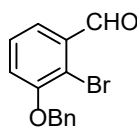

**Xu6-2**

To a solution of 2-bromo-3-hydroxybenzaldehyde **Xu5-1** (30 mmol) in DMF (50 mL) was added benzyl bromide (36 mmol, 1.2 equiv.) and K<sub>2</sub>CO<sub>3</sub> (45 mmol, 1.5 equiv.). The resulting solution was stirred at room temperature overnight. The reaction mixture was quenched by the addition of H<sub>2</sub>O and diluted with EtOAc. The organic layer was separated, and the aqueous layer was extracted twice with EtOAc. The combined organic layers were dried over Na<sub>2</sub>SO<sub>4</sub>, filtered, concentrated. The crude product was then washed by petroleum ether with a little ethyl acetate to afford the product **Xu6-2** as a white solid (6.7 g, 77% yield). Mp: 64.0 – 64.5 °C. <sup>1</sup>H NMR (400 MHz, Chloroform-*d*) δ 10.43 (d, *J* = 0.8 Hz, 1H), 7.49 (ddd, *J* = 15.1, 7.9, 1.3 Hz, 3H), 7.43 – 7.36 (m, 2H), 7.36 – 7.29 (m, 2H), 7.14 (dd, *J* = 8.1, 1.5 Hz, 1H), 5.19 (s, 2H). <sup>13</sup>C NMR (100 MHz, Chloroform-*d*) δ 192.24, 155.39, 135.94, 134.92, 128.72, 128.28, 128.23, 127.06, 121.79, 118.79, 117.90, 71.29. HRMS (ESI) calculated for [C<sub>14</sub>H<sub>12</sub>BrO<sub>2</sub>] [M+H]<sup>+</sup>: 291.0015 found: 291.0013.

### 2.2.3 2-bromo-3-(naphthalen-2-ylmethoxy)-benzaldehyde (**Xu7-2**)

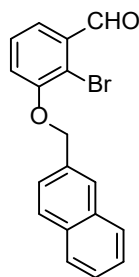

**Xu7-2**

Prepared from 2-bromo-3-hydroxybenzaldehyde **Xu5-1** (30 mmol) in DMF (50 mL) was added 2-(bromomethyl) naphthalene (36mmol, 1.2 equiv.) and K<sub>2</sub>CO<sub>3</sub> (45 mmol, 1.5 equiv.). The resulting solution was stirred at room temperature overnight. The reaction mixture was quenched by the addition of H<sub>2</sub>O and diluted with EtOAc. The organic layer was separated, and the aqueous layer was extracted twice with EtOAc. The combined organic layers were dried over Na<sub>2</sub>SO<sub>4</sub>, filtered, concentrated and washing by petroleum ether with a little ethyl acetate to afford the product **Xu7-2** as a white solid (8.7 g, 85% yield). Mp: 130.3 – 131.2 °C. <sup>1</sup>H NMR (500 MHz, Chloroform-*d*) δ 10.47 (s, 1 H), 8.00 – 7.80 (m, 4 H), 7.59 (dd, *J* = 8.5, 1.8 Hz, 1H), 7.56 – 7.47 (m, 3 H), 7.33 (t, *J* = 7.9 Hz, 1 H), 7.20 (dd, *J* = 8.1, 1.5 Hz, 1 H), 5.36 (s, 2 H). <sup>13</sup>C NMR (125 MHz, Chloroform-*d*) δ 192.2, 155.3, 134.8, 133.3, 133.2, 133.1, 128.5, 128.2, 127.9, 127.7, 126.3, 126.2, 126.0, 124.7, 121.8, 118.8, 117.8, 71.4. HRMS (ESI) calculated for [C<sub>18</sub>H<sub>14</sub>BrO<sub>2</sub>] [M+H]<sup>+</sup>: 341.0172 found: 341.0175.

#### 2.2.4 2-(2-bromo-3-isopropoxyphenyl)-1,3-dioxolane (**Xu5-3**)

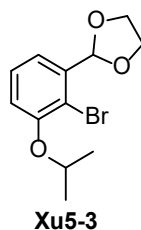

Prepared from 2-bromo-3-isopropoxybenzaldehyde **Xu5-2** (20 mmol) in 50 mL toluene, was added ethylene glycol (40 mmol, 2.0 equiv.) and *p*-toluenesulfonic acid (1 mmol, 5% mol). The resulting solution was stirred 18 hours at 150 °C. The reaction mixture was washed by the addition of H<sub>2</sub>O and the combined organic layers were dried over Na<sub>2</sub>SO<sub>4</sub>, filtered, concentrated, the crude product was then purified by flash column chromatography on silica gel (Petroleum ether: ethyl acetate = 20: 1) to afford the product **Xu5-3** as a white liquid (4.9 g, 85% yield). <sup>1</sup>H NMR (500 MHz, Chloroform-*d*) δ 7.26 (t, *J* = 7.9 Hz, 1 H), 7.20 (dd, *J* = 7.8, 1.7 Hz, 1 H), 6.92 (dd, *J* = 8.0, 1.7 Hz, 1 H), 6.16 (s, 1 H), 4.62 – 4.49 (m, 1 H), 4.17 – 4.10 (m, 2 H), 4.10 – 4.03 (m, 2 H), 1.38 (d, *J* = 6.1 Hz, 6 H). <sup>13</sup>C NMR (125 MHz, Chloroform-*d*) δ 154.6, 138.3, 127.7, 119.5, 116.2, 114.7, 102.7, 72.3, 65.3, 21.9. HRMS (ESI) calculated for [C<sub>12</sub>H<sub>16</sub>BrO<sub>3</sub>] [M+H]<sup>+</sup>: 287.0277 found: 287.0279.

#### 2.2.5 2-(3-(benzyloxy)-2-bromophenyl)-1,3-dioxolane (**Xu6-3**)

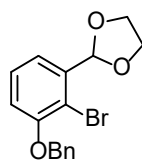

**Xu6-3**

To a solution of 3-(benzyloxy)-2-bromobenzaldehyde **Xu6-2** (20 mmol) in 50 mL toluene, was added ethylene glycol (40 mmol, 2.0 equiv.) and *p*-toluenesulfonic acid (1 mmol, 5% mol). The resulting solution was stirred 18 hours at 150 °C. The reaction mixture was washed by the addition of H<sub>2</sub>O and the combined organic layers were dried over Na<sub>2</sub>SO<sub>4</sub>, filtered, concentrated. The crude product was then washed by petroleum ether with a little ethyl acetate to afford the product **Xu6-3** as a white solid (5.7 g, 85% yield). <sup>1</sup>H NMR (500 MHz, Chloroform-*d*) δ 7.51 (d, *J* = 6.9 Hz, 2 H), 7.45 – 7.39 (m, 2 H), 7.38 – 7.32 (m, 1 H), 7.32 – 7.24 (m, 2 H), 6.97 (dd, *J* = 7.2, 2.4 Hz, 1 H), 6.22 (s, 1 H), 5.19 (s, 1 H), 4.21 – 4.06 (m, 4 H). <sup>13</sup>C NMR (125 MHz, Chloroform-*d*) δ 154.9, 138.3, 136.3, 128.4, 127.8, 127.8, 126.9, 119.7, 114.3, 113.4, 102.6, 70.9, 65.3. HRMS (ESI) calculated for [C<sub>16</sub>H<sub>16</sub>BrO<sub>3</sub>] [M+H]<sup>+</sup>: 335.0277 found: 325.0279. Mp: 82.7 – 83.4 °C.

### 2.2.6 2-(2-bromo-3-(naphthalen-2-ylmethoxy)-phenyl)-1,3-dioxolane (**Xu7-3**)

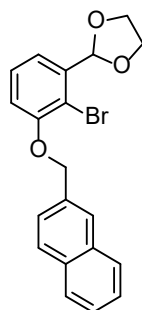

**Xu7-3**

Prepared from 2-bromo-3-(naphthalen-2-ylmethoxy)-benzaldehyde **Xu7-2** (20 mmol) in 50 mL toluene, was added ethylene glycol (40 mmol, 2.0 equiv.) and *p*-toluenesulfonic acid (1 mmol, 5% mol). The resulting solution was stirred 18 hours at 150 °C. The reaction mixture was washed by the addition of H<sub>2</sub>O and the combined organic layers were dried over Na<sub>2</sub>SO<sub>4</sub>, filtered, concentrated, after washing by petroleum ether with a little ethyl acetate to afford the product **Xu7-3** as a white solid (6.9 g, 90% yield). Mp: 96.8 – 97.6 °C. <sup>1</sup>H NMR (500 MHz, Chloroform-*d*) δ 7.94 (s, 1 H), 7.92 – 7.84 (m, 3 H), 7.60 (dd, *J* = 8.4, 1.7 Hz, 1 H), 7.55 – 7.48 (m, 2 H), 7.32 – 7.22 (m, 2 H), 7.03 – 6.97 (m, 1 H), 6.24 (s, 1 H), 5.33 (s, 2 H), 4.22 – 4.14 (m, 2 H), 4.14 – 4.06 (m, 2 H). <sup>13</sup>C



NMR (125 MHz, Chloroform-*d*)  $\delta$  155.0, 138.4, 133.8, 133.1, 133.0, 128.3, 127.9, 127.6, 126.1, 126.0, 125.8, 124.7, 119.8, 114.4, 113.5, 102.6, 71.2, 65.4. HRMS (ESI) calculated for  $[C_{20}H_{18}BrO_3] [M+H]^+$ : 385.0434 found: 385.0438.

### 2.2.7 (2-(benzyloxy)-6-(1,3-dioxolan-2-yl)-phenyl)-dicyclohexylphosphane (Xu5-4)

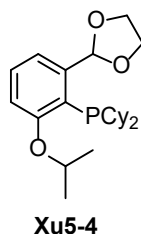

Prepared from 2-(2-bromo-3-isopropoxyphenyl)-1,3-dioxolane **Xu5-3** (15 mmol) in 20 mL anhydrous THF, was added *n*-BuLi (18 mmol, 1.6 M in hexane) dropwise under argon at -78 °C, The resulting solution at this temperature during 1 hour, and dicyclohexylchlorophosphine (17 mmol, 1.1 equiv.) was added dropwise. The reaction mixture was warmed to room temperature overnight. The re action mixture was quenched by the addition of NH<sub>4</sub>Cl (aq.) and diluted with EtOAc. The organic layer was separated, and the aqueous layer was extracted twice with EtOAc. The combined organic layers were dried over Na<sub>2</sub>SO<sub>4</sub>, filtered, concentrated, after washing by petroleum ether with a little ethyl acetate to afford the product **Xu5-4** as a white solid (4.5 g, 74% yield). Mp: 41.0-42.5 °C. <sup>1</sup>H NMR (500 MHz, Chloroform-*d*)  $\delta$  7.32 (t, *J* = 8.0 Hz, 1 H), 7.23 (dd, *J* = 7.8, 3.1 Hz, 1 H), 6.83 (d, *J* = 7.9 Hz, 1 H), 6.76 (d, *J* = 8.1 Hz, 1 H), 4.73 – 4.55 (m, 1 H), 4.16 – 4.08 (m, 2 H), 4.08 – 4.00 (m, 2 H), 2.54 – 2.38 (m, 2 H), 1.99 – 1.87 (m, 2 H), 1.86 – 1.72 (m, 2 H), 1.69 – 1.53 (m, 4 H), 1.3 8 (s, 3 H), 1.37 (s, 3 H), 1.33 – 1.23 (m, 6 H), 1.21 – 1.07 (m, 4 H), 1.02 – 0.91 (m, 2 H). <sup>13</sup>C NMR (125 MHz, Chloroform-*d*)  $\delta$  159.4 (d, *J* = 4.0 Hz), 146.5 (d, *J* = 21.5 Hz), 130.3, 123.6 (d, *J* = 30.3 Hz), 117.5 (d, *J* = 6.9 Hz), 110.7, 101.5 (d, *J* = 39.5 Hz), 68.3, 65.3, 34.7 (d, *J* = 9.7 H z), 32.8 (d, *J* = 24.3 Hz), 30.5 (d, *J* = 9.1 Hz), 27.3 (d, *J* = 8.7 Hz), 27.1 (d, *J* = 14.3 Hz), 26.3, 26.3, 21.7. <sup>31</sup>P NMR (202 MHz, Chloroform-*d*)  $\delta$  -10.97. HRMS (ESI) calculated for  $[C_{24}H_{38}O_3P] [M+H]^+$ : 405.2553 found: 405.2556.

### 2.2.8 (2-(benzyloxy)-6-(1,3-dioxolan-2-yl)-phenyl)-dicyclohexylphosphane (Xu6-4)

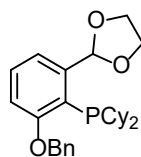

**Xu6-4**

To a solution of 2-(3-(benzyloxy)-2-bromophenyl)-1,3-dioxolane **Xu6-3** (15 mmol) in 20 mL anhydrous THF, was added *n*-BuLi (18 mmol, 1.6 M in hexane) dropwise under argon at -78 °C, The resulting solution at this temperature during 1 hour, and dicyclohexylchlorophosphine (17 mmol, 1.1 equiv.) was added dropwise. The reaction mixture was warmed to room temperature overnight. The reaction mixture was quenched by the addition of NH<sub>4</sub>Cl (aq.) and diluted with EtOAc. The organic layer was separated, and the aqueous layer was extracted twice with EtOAc. The combined organic layers were dried over Na<sub>2</sub>SO<sub>4</sub>, filtered, concentrated. The crude product was then washed by petroleum ether with a little ethyl acetate to afford the product **Xu6-4** as a white solid (6.0 g, 88% yield). Mp: 101.2-103.0 °C. <sup>1</sup>H NMR (500 MHz, Chloroform-*d*) δ 7.47 – 7.38 (m, 4 H), 7.40 – 7.29 (m, 3 H), 6.88 (d, *J* = 8.0 Hz, 1 H), 6.83 (d, *J* = 7.9 Hz, 1 H), 5.06 (s, 2 H), 4.19 – 4.08 (m, 2 H), 4.10 – 4.01 (m, 2 H), 2.41 – 2.28 (m, 2 H), 1.85 – 1.74 (m, 2 H), 1.73 – 1.65 (m, 2 H), 1.63 – 1.51 (m, 4 H), 1.35 – 1.18 (m, 4 H), 1.19 – 1.104 (m, 6 H), 1.03 – 0.92 (m, 2 H). <sup>13</sup>C NMR (125 MHz, Chloroform-*d*) δ 160.8 (d, *J* = 3.9 Hz), 146.3 (d, *J* = 21.3 Hz), 136.6, 130.5 (d, *J* = 1.5 Hz), 128.4, 128.0, 127.9, 123.9 (d, *J* = 31.3 Hz), 118.5 (d, *J* = 6.7 Hz), 111.1, 101.5 (d, *J* = 38.7 Hz), 70.4, 65.3, 34.1 (d, *J* = 9.7 Hz), 32.6 (d, *J* = 23.6 Hz), 30.6 (d, *J* = 9.4 Hz), 27.1 (d, *J* = 8.9 Hz), 26.9 (d, *J* = 14.1 Hz), 26.2. <sup>31</sup>P NMR (202 MHz, Chloroform-*d*) δ -10.61. HRMS (ESI) calculated for [C<sub>28</sub>H<sub>38</sub>O<sub>3</sub>P] [M+H]<sup>+</sup>: 453.2553 found: 453.2556.

### 2.2.9 (2-(benzyloxy)-6-(1,3-dioxolan-2-yl)-phenyl)-dicyclohexylphosphane (Xu7-4)

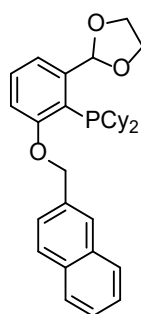

**Xu7-4**

Prepared from 2-(2-bromo-3-(naphthalen-2-ylmethoxy)phenyl)-1,3-dioxolane **Xu7-3** (15 mmol), in 20 mL anhydrous THF, was added *n*-BuLi (18 mmol, 1.6 M in hexane) dropwise under argon at -78 °C. The resulting solution at this temperature during 1 hour, and dicyclohexylchlorophosphine (17 mmol, 1.1 equiv.) was added dropwise. The reaction mixture was warmed to room temperature overnight. The reaction mixture was quenched by the addition of NH<sub>4</sub>Cl (aq.) and diluted with EtOAc. The organic layer was separated, and the aqueous layer was extracted twice with EtOAc. The combined organic layers were dried over Na<sub>2</sub>SO<sub>4</sub>, filtered, concentrated. The crude product was then purified by flash column chromatography on silica gel (petroleum ether: ethyl acetate = 20: 1) to afford the product **Xu7-4** as a white solid (5.3 g, 70% yield). Mp: 108.1-112.0 °C. <sup>1</sup>H NMR (500 MHz, Chloroform-*d*) δ 7.95 – 7.86 (m, 3 H), 7.86 – 7.82 (m, 1 H), 7.60 – 7.49 (m, 3 H), 7.41 – 7.31 (m, 2 H), 6.93 (dd, *J* = 7.6, 1.7 Hz, 1 H), 6.85 (d, *J* = 7.9 Hz, 1 H), 5.25 (s, 2 H), 4.18 – 4.11 (m, 2 H), 4.10 – 4.03 (m, 2 H), 2.47 – 2.35 (m, 2 H), 1.86 – 1.75 (m, 2 H), 1.71 – 1.55 (m, 6 H), 1.40 – 1.30 (m, 2 H), 1.29 – 1.18 (m, 2 H), 1.19 – 1.07 (m, 6 H), 1.07 – 0.95 (m, 2 H). <sup>13</sup>C NMR (125 MHz, Chloroform-*d*) δ 160.9 (d, *J* = 3.8 Hz), 146.4 (d, *J* = 21.3 Hz), 134.2, 133.2, 133.0, 130.6, 128.3, 127.8, 127.7, 126.5, 126.3, 126.1, 125.5, 124.0 (d, *J* = 31.3 Hz), 118.7 (d, *J* = 6.7 Hz), 111.3, 101.5 (d, *J* = 38.9 Hz), 70.5, 65.4, 34.2 (d, *J* = 9.9 Hz), 32.6 (d, *J* = 23.7 Hz), 30.6 (d, *J* = 9.3 Hz), 27.2 (d, *J* = 8.8 Hz), 26.9 (d, *J* = 14.0 Hz), 26.3. <sup>31</sup>P NMR (202 MHz, Chloroform-*d*) δ -10.44. HRMS (ESI) calculated for [C<sub>32</sub>H<sub>40</sub>O<sub>3</sub>P] [M+H]<sup>+</sup>: 503.2710 found: 503.2715.

### 2.2.10 2-(dicyclohexylphosphanyl)-3-isopropoxybenzaldehyde (**Xu5-5**)

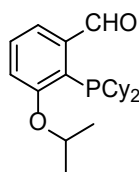

**Xu5-5**

Prepared from (2-(benzyloxy)-6-(1,3-dioxolan-2-yl)-phenyl)-dicyclohexylphosphane **Xu5-4** (2 mmol) in 2 mL THF, was added 3 mL HCl (1.0 M) under argon at 60 °C. The resulting solution was stirred 5 hours. The reaction mixture was quenched by the addition of NaHCO<sub>3</sub> (aq.) and diluted with EtOAc. The organic layer was separated, and the aqueous layer was extracted twice with EtOAc. The combined organic layers were dried over Na<sub>2</sub>SO<sub>4</sub>, filtered, concentrated and

purified by flash column chromatography on silica gel (petroleum ether: ethyl acetate = 20: 1) to afford the crude product **Xu5-5** as a yellow solid. Mp: 91.0-92.8 °C. <sup>1</sup>H NMR (500 MHz, Chloroform-*d*) δ 11.25 (dd, *J* = 9.1, 3.7 Hz, 1H), 7.48 (dt, *J* = 7.3, 3.4 Hz, 1H), 7.40 (td, *J* = 8.0, 3.6 Hz, 1H), 6.99 (dd, *J* = 8.3, 3.5 Hz, 1H), 4.68 (m, *J* = 5.8 Hz, 1H), 2.49 (dt, *J* = 11.5, 3.9 Hz, 2H), 1.93 (dt, *J* = 10.1, 4.5 Hz, 2H), 1.80 (d, *J* = 10.2 Hz, 2H), 1.65 – 1.57 (m, 4H), 1.42 (t, *J* = 4.9 Hz, 6H), 1.36 (dd, *J* = 9.6, 4.6 Hz, 1H), 1.29 (tt, *J* = 14.0, 6.5 Hz, 6H), 1.21 – 1.13 (m, 3H), 0.98 – 0.90 (m, 2H). <sup>13</sup>C NMR (125 MHz, Chloroform-*d*) δ 194.8 (d, *J* = 45.0 Hz), 160.1 (d, *J* = 3.6 Hz), 145.3 (d, *J* = 17.3 Hz), 130.5, 127.7 (d, *J* = 35.6 Hz), 119.0 (d, *J* = 6.7 Hz), 115.1, 69.0, 34.4 (d, *J* = 10.3 Hz), 32.5 (d, *J* = 23.3 Hz), 30.7 (d, *J* = 8.5 Hz), 27.2 (d, *J* = 8.3 Hz), 27.0 (d, *J* = 14.4 Hz), 26.3, 21.8. <sup>31</sup>P NMR (202 MHz, CDCl<sub>3</sub>) δ -16.79. HRMS (ESI) calculated for [C<sub>22</sub>H<sub>34</sub>O<sub>2</sub>P] [M+H]<sup>+</sup>: 361.2291 found: 361.2287.

### 2.2.11 3-(benzyloxy)-2-(dicyclohexylphosphanyl)-benzaldehyde (**Xu6-5**)

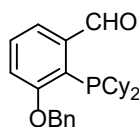

**Xu6-5**

To a solution of (2-(benzyloxy)-6-(1,3-dioxolan-2-yl)-phenyl)-dicyclohexylphosphane **Xu6-4** (2 mmol) in 2 mL THF, was added 3 mL HCl (1.0 M) under argon at 60 °C. The resulting solution was stirred 5 hours. The reaction mixture was quenched by the addition of NaHCO<sub>3</sub> (aq.) and diluted with EtOAc. The organic layer was separated, and the aqueous layer was extracted twice with EtOAc. The combined organic layers were dried over Na<sub>2</sub>SO<sub>4</sub>, filtered, concentrated and then was purified by flash column chromatography on silica gel (petroleum ether: ethyl acetate = 20: 1) to afford the crude product **Xu6-5** as a yellow solid. Mp: 85.2-87.2 °C. <sup>1</sup>H NMR (500 MHz, Chloroform-*d*) δ 11.27 (d, *J* = 8.9 Hz, 1H), 7.57 (dt, *J* = 7.4, 3.4 Hz, 1H), 7.50 – 7.38 (m, 6H), 7.14 (t, *J* = 6.1 Hz, 1H), 5.13 (d, *J* = 3.6 Hz, 2H), 2.39 (dp, *J* = 11.5, 3.9 Hz, 2H), 1.85 – 1.77 (m, 2H), 1.73 (dd, *J* = 9.1, 4.8 Hz, 2H), 1.66 – 1.57 (m, 4H), 1.37 – 1.31 (m, 2H), 1.26 – 1.05 (m, 8H), 0.98 (ddt, *J* = 12.1, 5.9, 3.3 Hz, 2H). <sup>13</sup>C NMR (125 MHz, Chloroform-*d*) δ 194.6 (d, *J* = 44.6 Hz), 161.6 (d, *J* = 3.6 Hz), 145.0 (d, *J* = 17.1 Hz), 136.2, 130.7, 128.7, 128.4, 128.1, 127.8, 119.9 (d, *J* = 6.6 Hz), 115.5, 70.9, 34.0 (d, *J* = 10.5 Hz), 32.3 (d, *J* = 22.8 Hz), 30.7 (d, *J* = 8.7 Hz), 27.0 (d, *J* =

8.7 Hz), 26.8 (d,  $J = 14.2$  Hz), 26.3.<sup>31</sup>P NMR (202 MHz, Chloroform-*d*)  $\delta$  -16.41. HRMS (ESI) calculated for [C<sub>26</sub>H<sub>34</sub>O<sub>2</sub>P] [M+H]<sup>+</sup>: 409.2291 found: 409.2302.

### 2.2.12 2-(dicyclohexylphosphanyl)-3-(naphthalen-2-ylmethoxy)-benzaldehyde (Xu7-5)

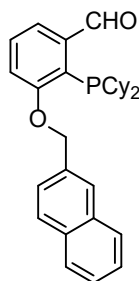

**Xu7-5**

Prepared from 2-(benzyloxy)-6-(1,3-dioxolan-2-yl)-phenyl-dicyclohexylphosphane **Xu7-4** (2 mmol) in 2 mL THF, was added 3 mL HCl (1.0 M) under argon at 60 °C. The resulting solution was stirred 5 hours. The reaction mixture was quenched by the addition of NaHCO<sub>3</sub> (aq.) and diluted with EtOAc. The organic layer was separated, and the aqueous layer was extracted twice with EtOAc. The combined organic layers were dried over Na<sub>2</sub>SO<sub>4</sub>, filtered, concentrated and purified by flash column chromatography on silica gel (petroleum ether: ethyl acetate = 20: 1) to afford the crude product **Xu7-5** as a yellow solid. Mp: 107.1-110.2 °C. <sup>1</sup>H NMR (500 MHz, Chloroform-*d*)  $\delta$  11.27 (d,  $J = 8.7$  Hz, 1H), 7.95 – 7.75 (m, 4H), 7.54 (ddd,  $J = 15.2, 6.9, 2.8$  Hz, 4H), 7.41 (t,  $J = 8.0$  Hz, 1H), 7.14 (d,  $J = 8.1$  Hz, 1H), 5.27 (s, 2H), 2.42 (dtd,  $J = 11.6, 7.8, 3.6$  Hz, 2H), 1.83 – 1.74 (m, 2H), 1.71 – 1.65 (m, 2H), 1.59 (t,  $J = 12.8$  Hz, 4H), 1.39 – 1.32 (m, 2H), 1.24 – 1.06 (m, 8H), 1.01 – 0.92 (m, 2H). <sup>13</sup>C NMR (125 MHz, Chloroform-*d*)  $\delta$  194.6 (d,  $J = 44.8$  Hz), 161.5 (d,  $J = 3.4$  Hz), 145.0, 144.9, 133.7, 133.2, 133.1, 130.7, 128.5, 127.8, 127.7, 126.8, 126.5, 126.3, 125.5, 119.9 (d,  $J = 6.5$  Hz), 115.5, 70.9, 34.0 (d,  $J = 10.5$  Hz), 32.3 (d,  $J = 23.0$  Hz), 30.7 (d,  $J = 8.7$  Hz), 27.0 (d,  $J = 8.6$  Hz), 26.7 (d,  $J = 14.3$  Hz), 26.2. <sup>31</sup>P NMR (202 MHz, Chloroform-*d*)  $\delta$  -16.35. HRMS (ESI) calculated for [C<sub>30</sub>H<sub>36</sub>O<sub>2</sub>P] [M+H]<sup>+</sup>: 459.2447 found: 459.2455.

### 2.2.13 (*R,E*)-N-(2-(dicyclohexylphosphanyl)-3-isopropoxybenzylidene)-2-methylpropane-2-sulfinamide (Xu5-6)

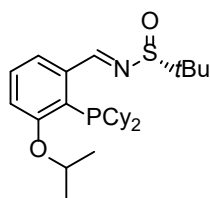

**Xu5-6**

Prepared from 2-(dicyclohexylphosphanyl)-3-isopropoxybenzaldehyde the crude product **Xu5-5** in 2 mL THF, was added (*R*)-2-methylpropane-2-sulfinamide (2.4 mmol, 1.2 equiv.) and titanium tetraisopropanolate (4 mmol, 2.0 equiv.) under argon at 50 °C. The resulting solution was stirred 8 hours. The reaction mixture was quenched by the addition of H<sub>2</sub>O (aq.) and diluted with EtOAc. The solution was filtered and the residue was washed twice with EtOAc. The combined organic layers were dried over Na<sub>2</sub>SO<sub>4</sub>, filtered, concentrated and purified by flash column chromatography on silica gel (petroleum ether: ethyl acetate = 10: 1) to afford the crude product **Xu5-6** as a yellow solid. Mp: 102.1-104.2 °C.  $[\alpha]_D^{20} = -108.9$  ( $c = 0.4$ , Chloroform). <sup>1</sup>H NMR (500 MHz, Chloroform-*d*) δ 9.86 (dd,  $J = 7.2, 1.9$  Hz, 1H), 7.55 (dd,  $J = 7.6, 2.8$  Hz, 1H), 7.35 (td,  $J = 8.0, 1.9$  Hz, 1H), 6.89 (d,  $J = 8.0$  Hz, 1H), 4.66 (pd,  $J = 6.1, 2.0$  Hz, 1H), 2.52 – 2.38 (m, 2H), 1.93 – 1.82 (m, 2H), 1.78 – 1.75 (m, 2H), 1.59 (q,  $J = 10.7, 8.8$  Hz, 4H), 1.40 (td,  $J = 4.9, 3.7, 2.0$  Hz, 6H), 1.28 (dd,  $J = 9.3, 2.1$  Hz, 15H), 1.19 – 1.08 (m, 4H), 0.97 – 0.89 (m, 2H). <sup>13</sup>C NMR (125 MHz, Chloroform-*d*) δ 165.0 (d,  $J = 41.2$  Hz), 160.1 (d,  $J = 3.5$  Hz), 143.8 (d,  $J = 21.8$  Hz), 130.3, 127.1 (d,  $J = 33.9$  Hz), 119.6 (d,  $J = 6.3$  Hz), 113.1, 68.8, 57.7, 34.6 (d,  $J = 11.5$  Hz), 32.3 (dd,  $J = 23.5, 4.8$  Hz), 30.5 (dd,  $J = 17.4, 8.7$  Hz), 27.2 (dd,  $J = 8.4, 4.5$  Hz), 27.0 (dd,  $J = 14.3, 7.8$  Hz), 26.3, 22.7, 21.8 (d,  $J = 5.6$  Hz). <sup>31</sup>P NMR (202 MHz, Chloroform-*d*) δ -12.13. HRMS (ESI) calculated for [C<sub>26</sub>H<sub>43</sub>NO<sub>2</sub>PS] [M+H]<sup>+</sup>: 464.2747 found: 464.2753.

#### 2.2.14 (*R, E*)-N-(3-(benzyloxy)-2-(dicyclohexylphosphanyl)benzylidene)-2-methylpropane-2-sulfinamide (**Xu6-6**)

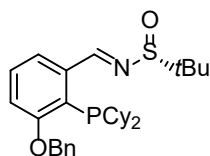

**Xu6-6**

To a solution of 3-(benzyloxy)-2-(dicyclohexylphosphanyl)-benzaldehyde the crude product **Xu6-5** in 2 mL THF, was added (*R*)-2-methylpropane-2-sulfinamide (2.4 mmol, 1.2 equiv.) and titanium tetrakisopropanolate (4 mmol, 2.0 equiv.) under argon at 50 °C. The resulting solution was stirred 8 hours. The reaction mixture was quenched by the addition of H<sub>2</sub>O (aq.) and diluted with EtOAc. The solution was filtered and the residue was washed twice with EtOAc. The combined organic layers were dried over Na<sub>2</sub>SO<sub>4</sub>, filtered, concentrated and then was purified by flash column chromatography on silica gel (petroleum ether: ethyl acetate = 10: 1) to afford the crude product **Xu6-6** as a yellow solid. Mp: 48.1-52.0 °C.  $[\alpha]_D^{20} = -110.0$  (*c* = 0.4, Chloroform). <sup>1</sup>H NMR (400 MHz, Chloroform-*d*) δ 9.85 (d, *J* = 7.2 Hz, 1H), 7.63 (ddd, *J* = 7.8, 3.1, 1.0 Hz, 1H), 7.48 – 7.33 (m, 6H), 7.05 – 6.96 (m, 1H), 5.08 (s, 2H), 2.32 (tt, *J* = 7.7, 3.4 Hz, 2H), 1.78 – 1.66 (m, 4H), 1.56 (d, *J* = 8.6 Hz, 4H), 1.27 (s, 9H), 1.20 – 1.04 (m, 8H), 0.97 – 0.81 (m, 4H). <sup>13</sup>C NMR (100 MHz, Chloroform-*d*) δ 164.8 (d, *J* = 40.5 Hz), 161.6 (d, *J* = 3.4 Hz), 143.5 (d, *J* = 21.2 Hz), 136.4, 130.4, 128.6, 128.3, 127.3 (d, *J* = 35.0 Hz), 120.5 (d, *J* = 6.2 Hz), 113.5, 70.7, 57.8, 34.1 (dd, *J* = 11.6, 5.3 Hz), 32.2, 32.0 (d, *J* = 1.9 Hz), 30.5 (dd, *J* = 13.1, 8.9 Hz), 29.7, 27.2 – 26.6 (m) 26.3, 22.7. <sup>31</sup>P NMR (162 MHz, Chloroform-*d*) δ -11.79. HRMS (ESI) calculated for [C<sub>30</sub>H<sub>43</sub>NO<sub>2</sub>PS] [M+H]<sup>+</sup>: 512.2747 found: 512.2757.

### 2.2.15 (*R, E*)-N-(2-(dicyclohexylphosphanyl)-3-(naphthalen-2-ylmethoxy)-benzylidene)-2-methylpropane-2-sulfinamide (**Xu7-6**)

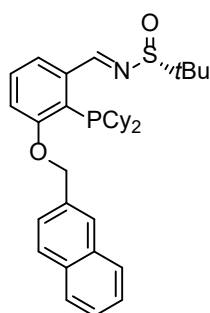

**Xu7-6**

Prepared from 2-(dicyclohexylphosphanyl)-3-(naphthalen-2-ylmethoxy)-benzaldehyde the crude product **Xu7-5** in 2 mL THF, was added (*R*)-2-methylpropane-2-sulfinamide (2.4 mmol, 1.2 equiv.) and titanium tetrakisopropanolate (4 mmol, 2.0 equiv.) under argon at 50 °C. The resulting solution was stirred 8 hours. The reaction mixture was quenched by the addition of H<sub>2</sub>O (aq.) and diluted

with EtOAc. The solution was filtered and the residue was washed twice with EtOAc. The combined organic layers were dried over Na<sub>2</sub>SO<sub>4</sub>, filtered, concentrated and purified by flash column chromatography on silica gel (petroleum ether: ethyl acetate = 10: 1) to afford the crude product **Xu7-6** as a yellow solid. Mp: 80-82.1 °C.  $[\alpha]_D^{20} = -77.1$  ( $c = 0.4$ , Chloroform). <sup>1</sup>H NMR (400 MHz, Chloroform-*d*) δ 9.86 (d,  $J = 7.2$  Hz, 1H), 7.92 – 7.87 (m, 3H), 7.84 (dt,  $J = 6.2, 3.5$  Hz, 1H), 7.64 (ddd,  $J = 7.8, 3.1, 1.0$  Hz, 1H), 7.53 (ddd,  $J = 10.8, 7.4, 2.5$  Hz, 3H), 7.37 (t,  $J = 8.0$  Hz, 1H), 7.07 – 7.02 (m, 1H), 5.26 (s, 2H), 2.46 – 2.32 (m, 2H), 1.78 – 1.70 (m, 2H), 1.69 – 1.63 (m, 2H), 1.62 – 1.53 (m, 4H), 1.38 – 1.29 (m, 3H), 1.27 (s, 10H), 1.11 (q,  $J = 8.3, 7.4$  Hz, 6H), 1.02 – 0.90 (m, 2H). <sup>13</sup>C NMR (100 MHz, Chloroform-*d*) δ 164.7 (d,  $J = 40.3$  Hz), 161.6 (d,  $J = 3.3$  Hz), 143.6, 143.4, 133.9, 133.3, 133.1, 130.5, 128.4, 127.8, 127.8, 126.7, 126.4, 126.2, 125.5, 120.6 (d,  $J = 6.1$  Hz), 113.7, 70.7, 57.8, 34.2 (dd,  $J = 11.4, 5.0$  Hz), 32.0 (d,  $J = 2.2$  Hz), 30.6 (dd,  $J = 12.9, 8.9$  Hz), 27.1 (dd,  $J = 8.6, 2.7$  Hz), 26.8 (dd,  $J = 14.1, 4.4$  Hz), 26.3, 22.7. <sup>31</sup>P NMR (162 MHz, Chloroform-*d*) δ -11.66. HRMS (ESI) calculated for [C<sub>34</sub>H<sub>45</sub>NO<sub>2</sub>PS] [M+H]<sup>+</sup>: 562.2903 found: 562.2908.

#### 2.2.16 (R)-N-((S)-[1,1'-biphenyl]-4-yl(3-(benzyloxy)-2-(dicyclohexylphosphanyl)-phenyl)-methyl)-2-methylpropane-2-sulfinamide (Xu5-7)

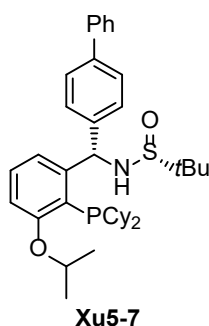

Prepared from (*R,E*)-N-(2-(dicyclohexylphosphanyl)-3-isopropoxybenzylidene)-2-methylpropane-2-sulfinamide the crude product **Xu5-6** in 2 mL anhydrous THF, was added [1,1'-biphenyl]-4-ylmagnesium bromide (4 mmol, 2.0 equiv.) dropwise under argon at -50 °C. The reaction mixture was warmed to room temperature overnight and was quenched by the addition of NH<sub>4</sub>Cl (aq.) and diluted with EtOAc. The organic layer was separated, and the aqueous layer was extracted twice with EtOAc. The combined organic layers were dried over Na<sub>2</sub>SO<sub>4</sub>, filtered,



concentrated and purified by flash column chromatography on silica gel (petroleum ether: ethyl acetate = 5: 1) to afford the product **Xu5-7** as a white solid (507 mg, 41% yield). Mp: 182.3-185.0 °C.  $[\alpha]_D^{20} = -99.7$  ( $c = 0.4$ , Chloroform).  $^1\text{H}$  NMR (500 MHz, Chloroform-*d*)  $\delta$  7.57 – 7.52 (m, 2 H), 7.51 – 7.47 (m, 4 H), 7.46 – 7.39 (m, 2 H), 7.38 – 7.29 (m, 2 H), 7.28 – 7.21 (m, 1 H), 7.01 (s, 1 H), 6.72 (d,  $J = 8.1$  Hz, 1 H), 4.69 – 4.53 (m, 1 H), 4.08 (s, 1 H), 2.45 – 2.27 (m, 2 H), 1.94 – 1.83 (m, 2 H), 1.81 – 1.73 (m, 1 H), 1.72 – 1.66 (m, 1 H), 1.65 – 1.56 (m, 2 H), 1.55 – 1.47 (m, 1 H), 1.40 – 1.34 (m, 7 H), 1.30 – 1.22 (m, 13 H), 1.21 – 1.09 (m, 4 H), 1.03 – 0.89 (m, 4 H).  $^{13}\text{C}$  NMR (125 MHz, Chloroform-*d*)  $\delta$  160.0 (d,  $J = 3.4$  Hz), 151.3 (d,  $J = 23.7$  Hz), 142.3, 141.0, 139.9, 130.1, 129.1, 129.1, 128.6, 127.1, 127.0, 126.9, 123.0 (d,  $J = 29.2$  Hz), 119.8 (d,  $J = 6.7$  Hz), 109.1, 68.4, 60.4 (d,  $J = 35.8$  Hz), 55.8, 35.6 (d,  $J = 10.4$  Hz), 34.8 (d,  $J = 11.2$  Hz), 33.4 (d,  $J = 26.9$  Hz), 32.5 (d,  $J = 23.8$  Hz), 30.3 (d,  $J = 9.6$  Hz), 30.0 (d,  $J = 6.9$  Hz), 27.4 (dd,  $J = 8.2, 3.3$  Hz), 27.1 (dd,  $J = 14.7, 9.9$  Hz), 26.2 (d,  $J = 3.6$  Hz), 22.7, 21.9, 21.8.  $^{31}\text{P}$  NMR (202 MHz, Chloroform-*d*)  $\delta$  -10.70. HRMS (ESI) calculated for  $[\text{C}_{38}\text{H}_{53}\text{NO}_2\text{PS}]$   $[\text{M}+\text{H}]^+$ : 618.3529 found: 618.3526.

### 2.2.17 (*R*)-*N*-((*S*)-[1,1'-biphenyl]-4-yl(3-(benzyloxy)-2-(dicyclohexylphosphanyl)-phenyl)-methyl)-2-methylpropane-2-sulfinamide (**Xu6-7**)

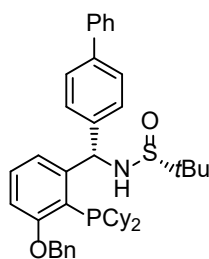

**Xu6-7**

To a solution of (*R, E*)-*N*-(3-(benzyloxy)-2-(dicyclohexylphosphanyl)-benzylidene)-2-methylpropane-2-sulfinamide the crude product **Xu6-6** in 2 mL anhydrous THF, was added [1,1'-biphenyl]-4-ylmagnesium bromide (4 mmol, 2.0 equiv.) dropwise under argon at -50 °C. The reaction mixture was warmed to room temperature overnight and was quenched by the addition of  $\text{NH}_4\text{Cl}$  (aq.) and diluted with EtOAc. The organic layer was separated, and the aqueous layer was extracted twice with EtOAc. The combined organic layers were dried over  $\text{Na}_2\text{SO}_4$ , filtered, concentrated. The crude product was purified by flash column chromatography on silica gel

(petroleum ether: ethyl acetate = 5: 1) to afford the product **Xu6-7** as a white solid (573 mg, 43% yield). Mp: 94.1-96.0 °C.  $[\alpha]_D^{20} = -101.7$  ( $c = 0.4$ , Chloroform).  $^1\text{H}$  NMR (500 MHz, Chloroform-*d*)  $\delta$  7.5 8 – 7.51 (m, 2 H), 7.49 (s, 4 H), 7.46 – 7.35 (m, 8 H), 7.36 – 7.29 (m, 2 H), 7.02 (s, 1 H), 6.84 (d,  $J = 8.1$  Hz, 1 H), 5.10 – 4.99 (m, 2 H), 4.04 (s, 1 H), 2.36 – 2.11 (m, 2 H), 1.74 – 1.65 (m, 3 H), 1.64 – 1.53 (m, 3 H), 1.52 – 1.42 (m, 1 H), 1.38 – 1.31 (m, 1 H), 1.31 – 1.22 (m, 11 H), 1.21 – 1.88 (m, 10 H).  $^{13}\text{C}$  NMR (125 MHz, Chloroform-*d*)  $\delta$  161.5 (d,  $J = 3.6$  Hz), 151.2 (d,  $J = 23.5$  Hz), 142.2, 141.0, 140.1, 136.7, 130.3, 129.19, 129.17, 128.7, 128.5, 128.1, 128.0, 127.18, 127.11, 127.0, 123.5 (d,  $J = 30.3$  Hz), 120.9 (d,  $J = 6.5$  Hz), 109.6, 70.5, 60.4 (d,  $J = 35.5$  Hz), 55.9, 35.1 (d,  $J = 10.4$  Hz), 34.2 (d,  $J = 11.2$  Hz), 33.2 (d,  $J = 26.4$  Hz), 32.3 (d,  $J = 22.9$  Hz), 30.5 (d,  $J = 10.0$  Hz), 30.2 (d,  $J = 7.4$  Hz), 27.3 (t,  $J = 8.5$  Hz), 27.0 (dd,  $J = 14.2, 11.7$  Hz), 26.3, 22.8.  $^{31}\text{P}$  NMR (202 MHz, Chloroform-*d*)  $\delta$  -10.35. HRMS (ESI) calculated for  $[\text{C}_{42}\text{H}_{53}\text{NO}_2\text{PS}]$   $[\text{M}+\text{H}]^+$ : 666.3529 found: 666.3526.

### 2.2.18 (*R*)-*N*-((*S*)-[1,1'-biphenyl]-4-yl(3-(benzyloxy)-2-(dicyclohexylphosphanyl)-phenyl)-methyl)-2-methylpropane-2-sulfinamide (**Xu7-7**)

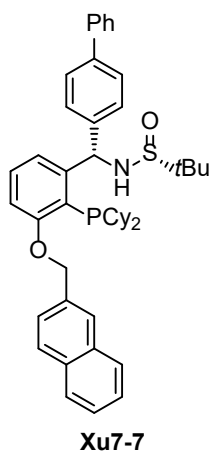

Prepared from (*R,E*)-*N*-(2-(dicyclohexylphosphanyl)-3-(naphthalen-2-ylmethoxy)benzylidene)-2-methylpropane-2-sulfinamide the crude product **Xu7-6** in 2 mL anhydrous THF, was added [1,1'-biphenyl]-4-ylmagnesium bromide (4 mmol, 2.0 equiv.) dropwise under argon at -50 °C. The reaction mixture was warmed to room temperature overnight and was quenched by the addition of  $\text{NH}_4\text{Cl}$  (aq.) and diluted with EtOAc. The organic layer was separated, and the aqueous layer was extracted twice with EtOAc. The combined organic layers were dried over  $\text{Na}_2\text{SO}_4$ , filtered,

concentrated and purified by flash silica gel column chromatography (petroleum ether: ethyl acetate = 5: 1) to afford the product **Xu7-7** as a white solid (659 mg, 46% yield). Mp: 95.2-98.3 °C.  $[\alpha]_D^{20} = -80.2$  ( $c = 0.4$ , Chloroform).  $^1\text{H NMR}$  (500 MHz, Chloroform-*d*)  $\delta$  7.93 – 7.87 (m, 3 H), 7.86 – 7.82 (m, 1 H), 7.57 – 7.56 (m, 1 H), 7.56 – 7.54 (m, 2 H), 7.54 – 7.53 (m, 1 H), 7.53 – 7.50 (m, 5 H), 7.46 – 7.37 (m, 3 H), 7.37 – 7.31 (m, 2 H), 7.06 (s, 1 H), 6.89 (d,  $J = 7.9$  Hz, 1 H), 5.33 – 5.18 (m, 2 H), 4.06 (s, 1 H), 2.44 – 2.21 (m, 2 H), 1.81 – 1.63 (m, 4 H), 1.63 – 1.53 (m, 2 H), 1.53 – 1.44 (m, 1 H), 1.43 – 1.31 (m, 3 H), 1.31 – 1.25 (m, 10 H), 1.22 – 1.14 (m, 2 H), 1.12 – 0.95 (m, 6 H), 0.94 – 0.87 (m, 1 H).  $^{13}\text{C NMR}$  (125 MHz, Chloroform-*d*)  $\delta$  161.5 (d,  $J = 3.3$  Hz), 151.1 (d,  $J = 23.4$  Hz), 142.1, 140.9, 140.0, 134.2, 133.2, 133.0, 130.3, 129.1, 129.1, 128.6, 128.3, 127.8, 127.7, 127.1, 127.03, 127.00, 126.5, 126.3, 126.1, 125.5, 123.5 (d,  $J = 30.2$  Hz), 120.9 (d,  $J = 5.2$  Hz), 109.7, 70.5, 60.3 (d,  $J = 40.4$  Hz), 55.9, 35.1 (d,  $J = 10.4$  Hz), 34.2 (d,  $J = 11.1$  Hz), 33.2 (d,  $J = 26.4$  Hz), 32.3 (d,  $J = 22.9$  Hz), 30.4 (d,  $J = 10.0$  Hz), 30.2 (d,  $J = 7.4$  Hz), 27.3 (t,  $J = 8.3$  Hz), 26.9 (dd,  $J = 14.5, 12.3$  Hz), 26.2, 22.8.  $^{31}\text{P NMR}$  (202 MHz, Chloroform-*d*)  $\delta$  -10.19. HR MS (ESI) calculated for  $[\text{C}_{46}\text{H}_{55}\text{NO}_2\text{PS}]$   $[\text{M}+\text{H}]^+$ : 716.3686 found: 716.3689.

### 2.2.19 (R)-N-((S)-[1,1'-biphenyl]-4-yl(2-(dicyclohexylphosphanyl)-3-isopropoxyphenyl)-methyl)-N,2-dimethylpropane-2-sulfonamide (**Xu5**)

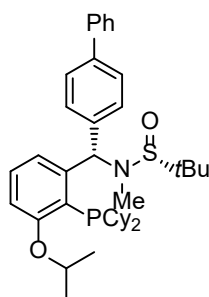

**Xu5**

Prepared from (R)-N-((S)-[1,1'-biphenyl]-4-yl(3-(benzyloxy)-2-(dicyclohexylphosphanyl)phenyl)-methyl)-2-methylpropane-2-sulfonamide **Xu5-7** (0.5 mmol) in 2 mL anhydrous THF, was added *n*-BuLi (0.75 mmol, 1.6 M in hexane) dropwise under argon at -40 °C. The resulting solution at this temperature during 1 hour and iodomethane (1 mmol, 2 equiv.) was added. After 1 hour, the reaction mixture moved to 0 °C and stirred 1 hour. The reaction mixture was the addition of  $\text{NH}_4\text{Cl}$

(aq.) and diluted with EtOAc. The organic layer was separated, and the aqueous layer was extracted twice with EtOAc. The combined organic layers were dried over Na<sub>2</sub>SO<sub>4</sub>, filtered, concentrated and purified by flash column chromatography on silica gel (petroleum ether: ethyl acetate = 5: 1) to afford the product **Xu6** as a white solid (234 mg, 74% yield). Mp: 85.7-87.2 °C. [ $\alpha$ ]<sub>D</sub><sup>20</sup> = -1.2 (*c* = 0.4, Chloroform). <sup>1</sup>H NMR (500 MHz, Chloroform-*d*)  $\delta$  7.60 – 7.52 (m, 2 H), 7.50 – 7.44 (m, 2 H), 7.43 – 7.36 (m, 4 H), 7.33 – 7.29 (m, 1 H), 7.29 – 7.23 (m, 2 H), 7.15 (d, *J* = 11.7 Hz, 1 H), 6.72 (dd, *J* = 7.0, 2.4 Hz, 1 H), 4.69 – 4.55 (m, 1 H), 2.64 (s, 3 H), 2.55 – 2.41 (m, 1 H), 2.22 – 2.09 (m, 1 H), 1.90 – 1.71 (m, 3 H), 1.70 – 1.54 (m, 3 H), 1.43 – 1.33 (m, 7 H), 1.31 – 1.21 (m, 5 H), 1.20 – 0.99 (m, 13 H), 0.99 – 0.72 (m, 4 H). <sup>13</sup>C NMR (125 MHz, Chloroform-*d*)  $\delta$  160.0 (d, *J* = 3.6 Hz), 150.0 (d, *J* = 22.8 Hz), 140.9, 139.8, 139.2, 131.7, 130.2, 128.6, 127.0, 126.9, 126.3, 122.8 (d, *J* = 28.5 Hz), 119.5 (d, *J* = 5.4 Hz), 109.1, 70.5 (d, *J* = 40.5 Hz), 68.3, 58.6, 35.4 (d, *J* = 10.0 Hz), 34.4 (d, *J* = 11.2 Hz), 33.5 (d, *J* = 27.1 Hz), 32.3 (d, *J* = 23.1 Hz), 30.7 (d, *J* = 10.7 Hz), 30.3, 29.6 (d, *J* = 6.7 Hz), 27.3 (dd, *J* = 8.4, 3.4 Hz), 27.0 (dd, *J* = 14.5, 9.3 Hz), 26.4, 26.1, 24.1, 21.87, 21.83. <sup>31</sup>P NMR (202 MHz, Chloroform-*d*)  $\delta$  -10.40. HRMS (ESI) calculated for [C<sub>39</sub>H<sub>55</sub>NO<sub>2</sub>PS] [M+H]<sup>+</sup>: 632.3686 found: 632.3684.

#### 2.2.20 ((*R*)-*N*-((*S*)-[1,1'-biphenyl]-4-yl(3-(benzyloxy)-2-(dicyclohexylphosphanyl)-phenyl)-methyl)-*N*,2-dimethylpropane-2-sulfinamide (**Xu6**)

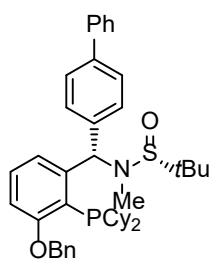

**Xu6**

To a solution of (*R*)-*N*-((*S*)-[1,1'-biphenyl]-4-yl(3-(benzyloxy)-2-(dicyclohexylphosphanyl)phenyl)-methyl)-2-methylpropane-2-sulfinamide **Xu6-7** (0.5 mmol) in 2 mL anhydrous THF, was added *n*-BuLi (0.75 mmol, 1.6 M in hexane) dropwise under argon at -40 °C. The resulting solution at this temperature during 1 hour and iodomethane (1 mmol, 2 equiv.) was added. After 1 hour, the reaction mixture moved to 0 °C and stirred 1 hour. The reaction mixture was the addition of NH<sub>4</sub>Cl

(aq.) and diluted with EtOAc. The organic layer was separated, and the aqueous layer was extracted twice with EtOAc. The combined organic layers were dried over Na<sub>2</sub>SO<sub>4</sub>, filtered, concentrated. The crude product was purified by flash column chromatography on silica gel (petroleum ether: ethyl acetate = 5: 1) to afford the product **Xu6** as a white solid (245 mg, 72% yield). Mp: 79.1-81.3 °C[α]<sub>D</sub><sup>20</sup> = -26.1 (c = 0.4, Chloroform). <sup>1</sup>H NMR (500 MHz, Chloroform-*d*) δ 7.57 – 7.52 (m, 2 H), 7.51 – 7.44 (m, 3 H), 7.43 (s, 1 H), 7.42 – 7.39 (m, 5 H), 7.39 – 7.34 (m, 1 H), 7.34-7.30 (m, 1 H), 7.29 – 7.23 (m, 3 H), 7.14 (d, *J* = 11.6 Hz, 1 H), 6.85 (d, *J* = 8.2, 1.0 Hz, 1 H), 5.03 (d, *J* = 2.3 Hz, 2 H), 2.64 (s, 3 H), 2.40 – 2.29 (m, 1 H), 2.07 – 1.95 (m, 1 H), 1.74 – 1.65 (m, 2 H), 1.64 – 1.56 (m, 3 H), 1.54 – 1.46 (m, 1 H), 1.41 – 1.34 (m, 1 H), 1.32 – 1.15 (m, 5 H), 1.14 – 1.10 (m, 12 H), 0.99 – 0.80 (m, 4 H), 0.79 – 0.70 (m, 1 H). <sup>13</sup>C NMR (125 MHz, Chloroform-*d*) δ 161.5 (d, *J* = 3.6 Hz), 149.9 (d, *J* = 22.5 Hz), 140.9, 139.9, 139.1, 136.7, 131.7, 130.4, 128.6, 128.4, 128.1, 128.0, 127.1, 127.0, 126.4, 123.3 (d, *J* = 29.6 Hz), 120.6 (d, *J* = 5.3 Hz), 109.6, 70.6 (d, *J* = 39.6 Hz), 70.4, 58.6, 34.9 (d, *J* = 10.0 Hz), 33.9 (d, *J* = 11.3 Hz), 33.2 (d, *J* = 26.4 Hz), 32.1 (d, *J* = 22.5 Hz), 30.8 (d, *J* = 11.3 Hz), 30.4, 29.8 (d, *J* = 7.5 Hz), 27.2 (dd, *J* = 8.5, 6.5 Hz), 26.9 (d, *J* = 2.9 Hz), 26.8 (d, *J* = 4.9 Hz), 26.4, 26.1, 24.1. <sup>31</sup>P NMR (202 MHz, Chloroform-*d*) δ -9.99. HRMS (ESI) calculated for [C<sub>43</sub>H<sub>55</sub>NO<sub>2</sub>PS] [M+H]<sup>+</sup>: 680.3686 found: 680.3689.

### 2.2.21 (*R*)-N-((*S*)-[1,1'-biphenyl]-4-yl(2-(dicyclohexylphosphanyl)-3-(naphthalen-2-ylmethoxy)-phenyl)-methyl)-N,2-dimethylpropane-2-sulfonamide (**Xu7**)

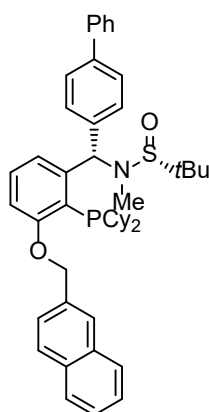

**Xu7**

Prepared from (*R*)-N-((*S*)-[1,1'-biphenyl]-4-yl(3-(benzyloxy)-2-(dicyclohexylphosphanyl)phenyl)-methyl)-2-methylpropane-2-sulfonamide **Xu7-7** (0.5 mmol) in 2 mL anhydrous THF, was added

*n*-BuLi (0.75 mmol, 1.6 M in hexane) dropwise under argon at -40 °C. The resulting solution at this temperature during 1 hour and iodomethane (1 mmol, 2 equiv.) was added. After 1 hour, the reaction mixture moved to 0 °C and stirred 1 hour. The reaction mixture was the addition of NH<sub>4</sub>Cl (aq.) and diluted with EtOAc. The organic layer was separated, and the aqueous layer was extracted twice with EtOAc. The combined organic layers were dried over Na<sub>2</sub>SO<sub>4</sub>, filtered, concentrated and purified by flash column chromatography on silica gel (petroleum ether: ethyl acetate = 5: 1) to afford the product **Xu7** as a white solid (277 mg, 76% yield). Mp: 89.1-91.3 °C. [ $\alpha$ ]<sub>D</sub><sup>20</sup> = -44.34 (*c* = 0.4, Chloroform). <sup>1</sup>H NMR (500 MHz, Chloroform-*d*)  $\delta$  7.95 – 7.85 (m, 3 H), 7.85 – 7.80 (m, 1 H), 7.61 – 7.52 (m, 3 H), 7.52 – 7.46 (m, 5 H), 7.46 – 7.39 (m, 3 H), 7.36 – 7.29 (m, 1 H), 7.30 – 7.24 (m, 2 H), 7.16 (d, *J* = 11.6 Hz, 1 H), 6.90 (d, *J* = 8.1, 1 H), 5.21 (d, *J* = 2.1 Hz, 2 H), 2.66 (s, 3 H), 2.51 – 2.33 (m, 1 H), 2.17 – 2.02 (m, 1 H), 1.74 – 1.54 (m, 5 H), 1.53 – 1.42 (m, 1 H), 1.41 – 1.32 (m, 2 H), 1.29 – 1.04 (m, 16 H), 0.97 – 0.84 (m, 4 H), 0.81 – 0.70 (m, 1 H). <sup>13</sup>C NMR (125MHz, Chloroform-*d*)  $\delta$  161.6 (d, *J* = 3.6 Hz), 149.9 (d, *J* = 22.7 Hz), 140.9, 139.9, 139.1, 134.2, 133.2, 133.0, 131.7, 130.5, 128.6, 128.2, 127.7, 127.7, 127.1, 127.0, 126.6, 126.4, 126.3, 126.1, 125.6, 123.3 (d, *J* = 29.5 Hz), 120.6 (d, *J* = 5.4 Hz), 109.7, 70.6 (d, *J* = 39.9 Hz), 70.5, 58.6, 35.0 (d, *J* = 10.0 Hz), 33.9 (d, *J* = 11.3 Hz), 33.2 (d, *J* = 26.5 Hz), 32.1 (d, *J* = 22.6 Hz), 30.8 (d, *J* = 11.2 Hz), 30.4, 29.8 (d, *J* = 7.3 Hz), 27.2 (dd, *J* = 8.6, 5.5 Hz), 26.8 (dd, *J* = 14.5, 3.2 Hz), 26.3, 26.1, 24.1. <sup>31</sup>P NMR (202 MHz, Chloroform-*d*)  $\delta$  -10.19. HRMS (ESI) calculated for [C<sub>47</sub>H<sub>57</sub>NO<sub>2</sub>PS] [M+H]<sup>+</sup>: 730.3842 found: 730.3847.

### 2.3 Synthesis of **Xu8**, **Xu9**, (*R*, *R*<sub>S</sub>)-**Xu9**

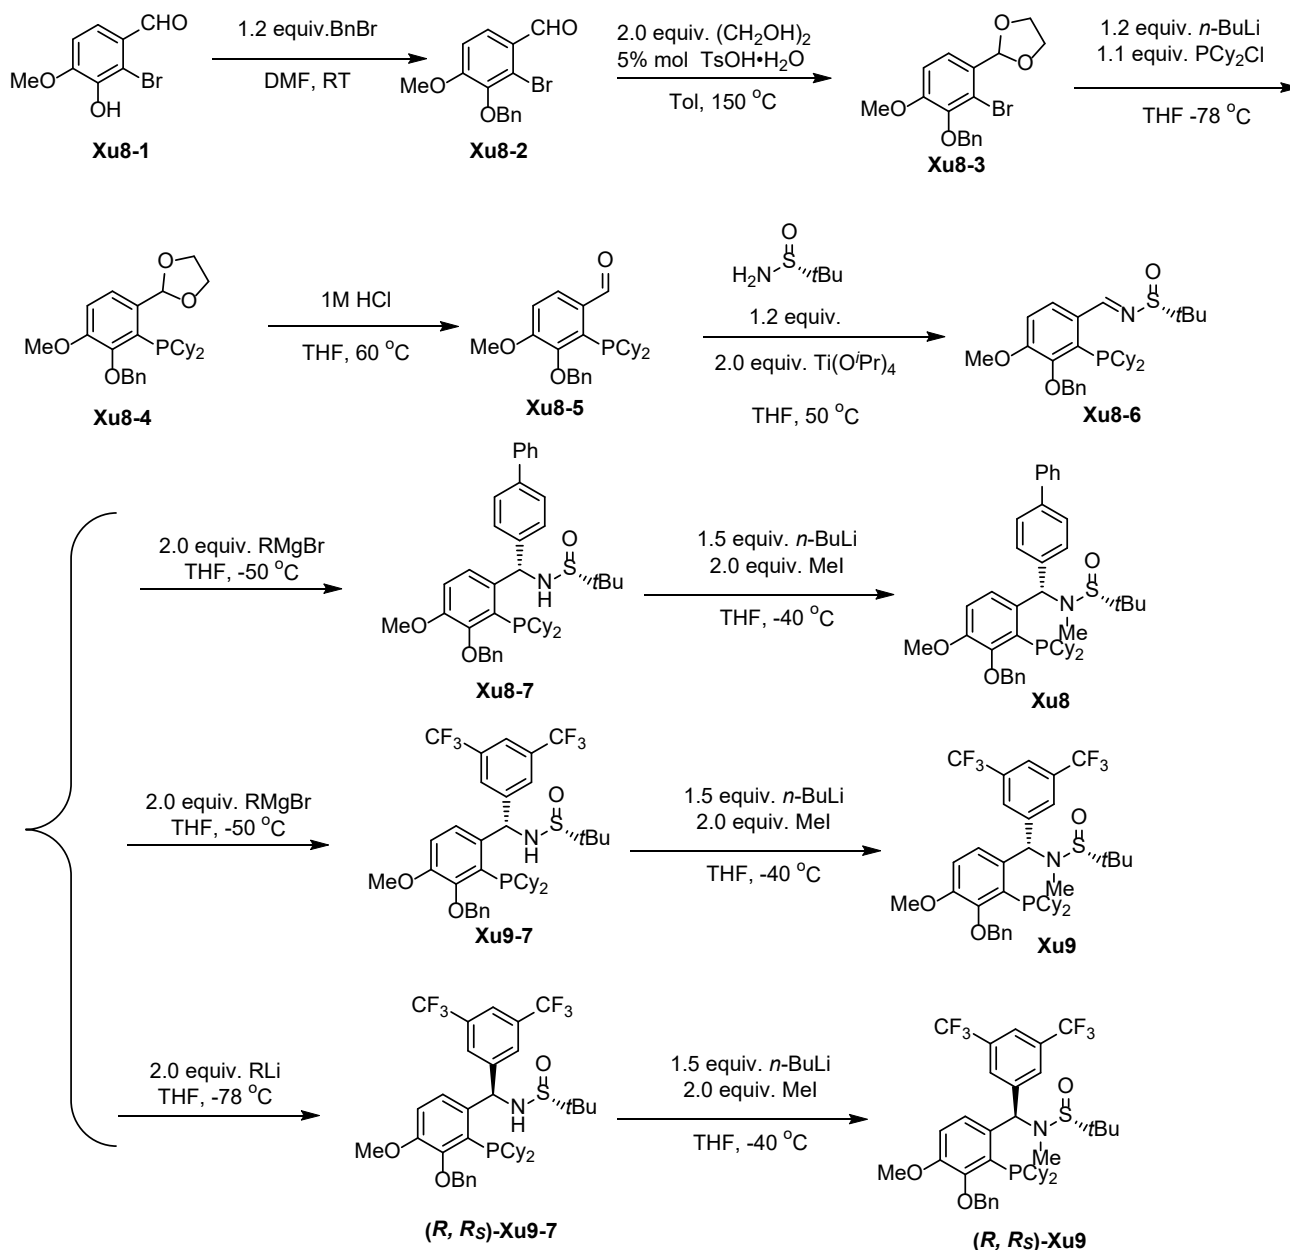

Prepared from 2-bromo-3-hydroxy-4-methoxybenzaldehyde, according to the preparation of **Xu5**

### 2.3.1 3-(benzyloxy)-2-bromo-4-methoxybenzaldehyde (**Xu8-2**)

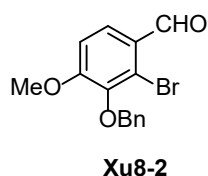

Prepared from 2-bromo-3-hydroxy-4-methoxybenzaldehyde (30 mmol) in DMF (50 mL) was added benzyl bromide (36mmol, 1.2 equiv.) and  $\text{K}_2\text{CO}_3$  (45 mmol, 1.5 equiv.). The resulting

solution was stirred at room temperature overnight. The reaction mixture was quenched by the addition of H<sub>2</sub>O and diluted with EtOAc. The organic layer was separated, and the aqueous layer was extracted twice with EtOAc. The combined organic layers were dried over Na<sub>2</sub>SO<sub>4</sub>, filtered, concentrated. The crude product was then washed by petroleum ether with a little ethyl acetate to afford the product **Xu8-2** as a white solid (8.4 g, 87% yield). Mp: 72.2-74.5 °C. <sup>1</sup>H NMR (400 MHz, Chloroform-*d*) δ 10.25 (d, *J* = 0.9 Hz, 1H), 7.74 (d, *J* = 8.7 Hz, 1H), 7.57 – 7.48 (m, 2H), 7.43 – 7.28 (m, 3H), 6.96 (d, *J* = 8.7 Hz, 1H), 5.04 (s, 2H), 3.94 (s, 3H). <sup>13</sup>C NMR (100 MHz, Chloroform-*d*) δ 190.9, 158.7, 145.0, 136.5, 128.4, 128.3, 128.2, 127.3, 126.5, 123.4, 110.9, 74.7, 56.2. HRMS (ESI) calculated for [C<sub>15</sub>H<sub>13</sub>BrNaO<sub>3</sub>] [M+Na]<sup>+</sup>: 342.9940 found: 342.9930.

### 2.3.2 3-(benzyloxy)-2-bromo-4-methoxybenzaldehyde (**Xu8-3**)

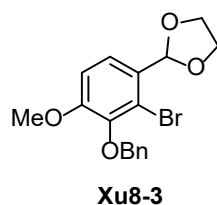

Prepared from 3-(benzyloxy)-2-bromo-4-methoxybenzaldehyde (**Xu8-2**) (20 mmol) in 50 mL toluene, was added ethylene glycol (40 mmol, 2.0 equiv.) and *p*-toluenesulfonic acid (1 mmol, 5% mol). The resulting solution was stirred 18 hours at 150 °C. The reaction mixture was washed by the addition of H<sub>2</sub>O and the combined organic layers were dried over Na<sub>2</sub>SO<sub>4</sub>, filtered, concentrated. The crude product was purified by flash column chromatography on silica gel (petroleum ether: ethyl acetate = 20: 1) to afford the product **Xu8-3** as a white liquid (3.9 g, 53% yield). Mp: 106.2-108.5 °C. <sup>1</sup>H NMR (400 MHz, Chloroform-*d*) δ 7.60 – 7.51 (m, 2 H), 7.44 – 7.28 (m, 4 H), 6.89 (d, *J* = 8.6 Hz, 1 H), 6.07 (s, 1 H), 5.00 (s, 1 H), 4.16 – 4.09 (m, 2 H), 4.09 – 4.01 (m, 2 H), 3.86 (s, 2 H). <sup>13</sup>C NMR (100 MHz, Chloroform-*d*) δ 154.3, 145.1, 137.0, 129.4, 128.3, 128.2, 127.9, 123.0, 119.1, 111.0, 102.6, 74.5, 65.3, 56.0. HRMS (ESI) calculated for [C<sub>17</sub>H<sub>17</sub>BrNaO<sub>4</sub>] [M+Na]<sup>+</sup>: 387.0202 found: 387.0205.

### 2.3.3 3-(benzyloxy)-2-bromo-4-methoxybenzaldehyde (**Xu8-4**)



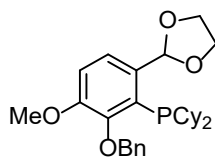

**Xu8-4**

Prepared from 3-(benzyloxy)-2-bromo-4-methoxybenzaldehyde (**Xu8-3**) (5 mmol) in 20 mL anhydrous THF, was added *n*-BuLi (18 mmol, 1.6 M in hexane) dropwise under argon at -78 °C, The resulting solution at this temperature during 1 hour, and dicyclohexylchlorophosphine (17 mmol, 1.1 equiv.) was added dropwise. The reaction mixture was warmed to room temperature overnight. The re action mixture was quenched by the addition of NH<sub>4</sub>Cl (aq.) and diluted with EtOAc. The organic layer was separated, and the aqueous layer was extracted twice with EtOAc. The combined organic layers were dried over Na<sub>2</sub>SO<sub>4</sub>, filtered, concentrated. The crude product was purified by flash column chromatography on silica gel (petroleum ether: ethyl acetate = 20: 1) to afford the crude product **Xu8-4** as a white liquid. Mp: 96.2-98.8 °C. <sup>1</sup>H NMR (400 MHz, Chloroform-*d*) δ 7.46 (d, *J* = 7.5 Hz, 2H), 7.37 (td, *J* = 6.9, 6.5, 3.8 Hz, 2H), 7.33 – 7.29 (m, 1H), 7.26 (d, *J* = 3.1 Hz, 1H), 6.98 (d, *J* = 2.4 Hz, 1H), 6.59 (d, *J* = 7.3 Hz, 1H), 5.14 (s, 2H), 4.11 (q, *J* = 3.5, 2.6 Hz, 2H), 4.01 (dd, *J* = 4.6, 2.7 Hz, 2H), 3.88 (s, 3H), 1.94 – 1.84 (m, 4H), 1.78 (d, *J* = 12.9 Hz, 2H), 1.71 – 1.61 (m, 4H), 1.58 – 1.50 (m, 2H), 1.34 – 1.14 (m, 8H), 1.06 (td, *J* = 12.1, 11.6, 4.0 Hz, 2H). <sup>13</sup>C NMR (100 MHz, Chloroform-*d*) δ 149.3, 149.2, 137.2 (d, *J* = 21.7 Hz), 136.8, 128.4, 127.9, 127.6, 126.5 (d, *J* = 23.1 Hz), 115.1, 110.8 (d, *J* = 6.7 Hz), 101.0 (d, *J* = 33.0 Hz), 70.7, 65.3, 56.2, 34.2 (d, *J* = 12.1 Hz), 30.5 (d, *J* = 17.7 Hz), 29.1 (d, *J* = 8.0 Hz), 27.1 (d, *J* = 9.0 Hz), 27.0 (d, *J* = 4.3 Hz), 26.3. <sup>31</sup>P NMR (162 MHz, Chloroform-*d*) δ -17.48. HRMS (ESI) calculated for [C<sub>29</sub>H<sub>40</sub>O<sub>4</sub>P] [M+Na]<sup>+</sup>: 483.2659 found: 483.2672.

### 2.3.4 3-(benzyloxy)-2-bromo-4-methoxybenzaldehyde (**Xu8-5**)

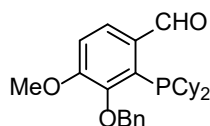

**Xu8-5**

Prepared from 3-(benzyloxy)-2-bromo-4-methoxybenzaldehyde the crude product (**Xu8-4**) in 2 mL THF, was added 3 mL HCl (1.0 M) under argon at 60 °C. The resulting solution was stirred 5 hours.

The reaction mixture was quenched by the addition of NaHCO<sub>3</sub> (aq.) and diluted with EtOAc. The organic layer was separated, and the aqueous layer was extracted twice with EtOAc. The combined organic layers were dried over Na<sub>2</sub>SO<sub>4</sub>, filtered, concentrated and purified by flash column chromatography on silica gel (petroleum ether: ethyl acetate = 20: 1) to afford the crude product **Xu8-5** as a yellow solid. Mp: 95.5-97.2 °C. <sup>1</sup>H NMR (400 MHz, Chloroform-*d*) δ 11.07 (d, *J* = 8.7 Hz, 1H), 7.78 (dd, *J* = 8.6, 3.2 Hz, 1H), 7.54 – 7.46 (m, 2H), 7.46 – 7.40 (m, 2H), 7.39 – 7.32 (m, 1H), 7.07 (d, *J* = 8.6 Hz, 1H), 5.20 (s, 2H), 3.92 (s, 3H), 2.36 (tdt, *J* = 11.4, 7.4, 3.3 Hz, 2H), 1.86 – 1.77 (m, 2H), 1.75 – 1.66 (m, 2H), 1.64 – 1.52 (m, 4H), 1.39 – 1.32 (m, 2H), 1.26 – 1.09 (m, 8H), 1.04 – 0.91 (m, 2H). <sup>13</sup>C NMR (100 MHz, Chloroform-*d*) δ 193.4 (d, *J* = 42.1 Hz), 156.0, 150.6, 138.0, 136.7, 133.4 (d, *J* = 37.7 Hz), 128.3, 127.7, 127.3, 124.4 (d, *J* = 6.2 Hz), 113.3, 73.9, 55.7, 34.5 (d, *J* = 11.6 Hz), 32.4 (d, *J* = 23.2 Hz), 30.8 (d, *J* = 9.7 Hz), 26.8 (d, *J* = 8.9 Hz), 26.6 (d, *J* = 14.0 Hz), 26.2 (d, *J* = 1.4 Hz). <sup>31</sup>P NMR (162 MHz, Chloroform-*d*) δ -13.94. HRMS (ESI) calculated for [C<sub>27</sub>H<sub>36</sub>O<sub>3</sub>P] [M+H]<sup>+</sup>: 439.2397 found: 439.2407.

### 2.3.5 (*R*, *E*)-N-(3-(benzyloxy)-2-(dicyclohexylphosphanyl)-4-methoxybenzylidene)-2-methylpropane-2-sulfinamide (**Xu8-6**)

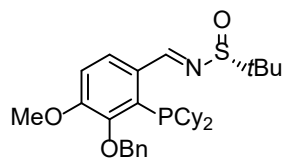

**Xu8-6**

Prepared from 3-(benzyloxy)-2-bromo-4-methoxybenzaldehyde the crude product **Xu8-5** in 2 mL THF, was added (*R*)-2-methylpropane-2-sulfinamide (2.4 mmol, 1.2 equiv.) and titanium tetraisopropanolate (4 mmol, 2.0 equiv.) under argon at 50 °C. The resulting solution was stirred 8 hours. The reaction mixture was quenched by the addition of H<sub>2</sub>O (aq.) and diluted with EtOAc. The solution was filtered and the residue was washed twice with EtOAc. The combined organic layers were dried over Na<sub>2</sub>SO<sub>4</sub>, filtered, concentrated and purified by flash column chromatography on silica gel (petroleum ether: ethyl acetate = 10: 1) to afford the crude product **Xu8-6** as a yellow solid. Mp: 111.2-114.1 °C. [ $\alpha$ ]<sub>D</sub><sup>20</sup> = -90.7 (*c* = 0.4, Chloroform). <sup>1</sup>H NMR (400 MHz, Chloroform-*d*) δ 9.65 (s, 1H), 7.87 (dd, *J* = 8.7, 2.8 Hz, 1H), 7.57 – 7.48 (m, 2H), 7.47 – 7.39 (m,

2H), 7.38 – 7.30 (m, 1H), 7.04 (d,  $J = 8.6$  Hz, 1H), 5.17 (s, 2H), 3.90 (s, 3H), 2.33 (dddd,  $J = 14.9, 11.3, 7.7, 3.5, 3.0$  Hz, 2H), 1.79 (d,  $J = 11.9$  Hz, 2H), 1.69 (d,  $J = 7.6$  Hz, 2H), 1.57 (d,  $J = 7.5$  Hz, 4H), 1.38 – 1.31 (m, 2H), 1.26 (s, 9H), 1.25 – 1.06 (m, 8H), 1.03 – 0.90 (m, 2H).  $^{13}\text{C}$  NMR (100 MHz, Chloroform-*d*)  $\delta$  164.1, 163.7, 154.5, 151.0, 138.0, 128.3, 127.6, 127.4, 124.3, 124.3, 113.5, 74.0, 57.5, 55.6, 34.8, 32.3 (d,  $J = 24.1$  Hz), 30.7 (dd,  $J = 9.7, 7.1$  Hz), 26.8 (d,  $J = 8.9$  Hz), 26.6 (dd,  $J = 13.9, 4.4$  Hz), 26.2, 22.6.  $^{31}\text{P}$  NMR (162 MHz, Chloroform-*d*)  $\delta$  -9.32. HRMS (ESI) calculated for  $[\text{C}_{31}\text{H}_{45}\text{NO}_3\text{PS}]$   $[\text{M}+\text{H}]^+$ : 542.2852 found: 542.2865.

### 2.3.6 (*R*)-*N*-((*S*)-[1,1'-biphenyl]-4-yl(3-(benzyloxy)-2-(dicyclohexylphosphanyl)-4-methoxyphenyl)-methyl)-2-methylpropane-2-sulfinamide (**Xu8-7**)

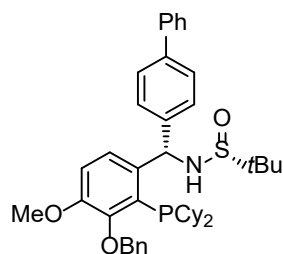

**Xu8-7**

Prepared from (*R, E*)-*N*-(3-(benzyloxy)-2-(dicyclohexylphosphanyl)-4-methoxybenzylidene)-2-methylpropane-2-sulfinamide the crude product **Xu8-6** in 2 mL anhydrous THF, was added [1,1'-biphenyl]-4-ylmagnesium bromide (4 mmol, 2.0 equiv.) dropwise under argon at -50 °C. The reaction mixture was warmed to room temperature overnight and was quenched by the addition of  $\text{NH}_4\text{Cl}$  (aq.) and diluted with EtOAc. The organic layer was separated, and the aqueous layer was extracted twice with EtOAc. The combined organic layers were dried over  $\text{Na}_2\text{SO}_4$ , filtered, concentrated and purified by flash column chromatography on silica gel (petroleum ether: ethyl acetate = 5: 1) to the product **Xu8-7** as a white solid (626 mg, 18% yield). Mp: 87.8-89.0 °C.  $[\alpha]_{\text{D}}^{20} = -109.2$  ( $c = 0.4$ , Chloroform).  $^1\text{H}$  NMR (500 MHz, Chloroform-*d*)  $\delta$  7.60 – 7.52 (m, 2 H), 7.52 – 7.45 (m, 6 H), 7.45 – 7.36 (m, 5 H), 7.35 – 7.28 (m, 2 H), 7.06 (d,  $J = 8.6$  Hz, 1 H), 6.93 (s, 1 H), 5.28 (d,  $J = 11.7$  Hz, 1 H), 5.17 (d,  $J = 11.7$  Hz, 1 H), 4.00 (s, 1 H), 3.86 (s, 3 H), 2.34 – 2.16 (m, 2 H), 1.79 – 1.53 (m, 6 H), 1.51 – 1.41 (m, 1 H), 1.38 – 0.87 (m, 22 H).  $^{13}\text{C}$  NMR (125 MHz, Chloroform-*d*)  $\delta$  150.8 (d,  $J = 3.7$  Hz), 150.5, 142.4, 141.9 (d,  $J = 23.9$  Hz), 140.9, 140.0, 138.5, 129.18, 129.17, 128.7 (d,  $J = 29.4$  Hz), 128.6, 128.1, 127.3, 127.1, 127.03, 127.00, 126.9, 123.2 (d,

$J = 6.5$  Hz), 113.8, 73.3, 60.0 (d,  $J = 35.5$  Hz), 55.8, 55.5, 35.2 (d,  $J = 10.7$  Hz), 34.3 (d,  $J = 11.3$  Hz), 33.1 (d,  $J = 25.9$  Hz), 32.3 (d,  $J = 22.8$  Hz), 30.4 (dd,  $J = 21.4, 9.2$  Hz), 27.0 (dd,  $J = 8.6, 6.2$  Hz), 26.8 (dd,  $J = 14.2, 8.0$  Hz), 26.2, 22.7.  $^{31}\text{P}$  NMR (202 MHz, Chloroform-*d*)  $\delta$  -6.74. HRMS (ESI) calculated for  $[\text{C}_{43}\text{H}_{54}\text{NNaO}_3\text{PS}]$   $[\text{M}+\text{Na}]^+$ : 718.3454 found: 718.3457.

### 2.3.7 (*R*)-*N*-((*S*)-(3-(benzyloxy)-2-(dicyclohexylphosphaneyl)-4-methoxyphenyl)(3,5-bis(trifluoromethyl)phenyl)methyl)-2-methylpropane-2-sulfinamide (**Xu9-7**)

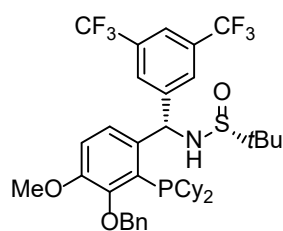

**Xu9-7**

Prepared from (*R, E*)-*N*-(3-(benzyloxy)-2-(dicyclohexylphosphanyl)-4-methoxybenzylidene)-2-methylpropane-2-sulfinamide the crude product **Xu8-6** in 2 mL anhydrous THF, was added (3,5-bis(trifluoromethyl)phenyl)magnesium bromide (10 mmol, 5.0 equiv.) dropwise under argon at -50 °C. The reaction mixture was warmed to room temperature overnight and was quenched by the addition of  $\text{NH}_4\text{Cl}$  (aq.) and diluted with EtOAc. The organic layer was separated, and the aqueous layer was extracted twice with EtOAc. The combined organic layers were dried over  $\text{Na}_2\text{SO}_4$ , filtered, concentrated and purified by flash column chromatography on silica gel (petroleum ether: ethyl acetate = 5: 1) to the product **Xu9-7** as a white solid (800 mg, 53% yield). Mp: 68.1-71.3 °C.  $[\alpha]_{\text{D}}^{20} = -67.8$  ( $c = 0.4$ , Chloroform).  $^1\text{H}$  NMR (500 MHz, Chloroform-*d*)  $\delta$  7.93 (s, 2H), 7.71 (s, 1H), 7.45 (d,  $J = 8.1$  Hz, 2H), 7.42 – 7.36 (m, 2H), 7.34 – 7.27 (m, 2H), 7.06 (dd,  $J = 8.6, 1.8$  Hz, 1H), 6.86 (s, 1H), 5.28 (dd,  $J = 11.7, 1.7$  Hz, 1H), 5.15 (d,  $J = 11.6$  Hz, 1H), 3.87 (d,  $J = 1.8$  Hz, 3H), 2.23 (d,  $J = 14.7$  Hz, 2H), 1.80 – 1.47 (m, 10H), 1.40 – 1.33 (m, 1H), 1.27 (d,  $J = 1.9$  Hz, 9H), 1.16 – 0.91 (m, 9H).  $^{13}\text{C}$  NMR (125 MHz, Chloroform-*d*)  $\delta$  151.2, 151.0, 146.4, 140.5 (d,  $J = 24.7$  Hz), 138.3, 131.3 (q,  $J = 33.0$  Hz), 128.9, 128.2, 127.5, 127.1, 124.4, 123.1, 122.2, 120.9, 114.2, 73.5, 56.2, 55.5, 35.3 (d,  $J = 10.0$  Hz), 34.3 (d,  $J = 10.4$  Hz), 33.1 (d,  $J = 25.9$  Hz), 32.3 (d,  $J = 22.5$  Hz), 30.6 (d,  $J = 9.3$  Hz), 30.5 (d,  $J = 10.5$  Hz), 27.0, 26.9, 26.9, 26.8 (d,  $J = 3.6$  Hz), 26.7 (d,  $J = 4.5$  Hz), 26.1 (d,  $J = 5.1$  Hz), 22.7.  $^{31}\text{P}$  NMR (202 MHz, Chloroform-*d*)  $\delta$  -5.95.

$^{19}\text{F}$  NMR (376 MHz, Chloroform-*d*)  $\delta$  -62.72. HRMS (ESI) calculated for  $[\text{C}_{39}\text{H}_{49}\text{F}_6\text{NO}_3\text{PS}]$   $[\text{M}+\text{H}]^+$ : 756.3069 found: 756.3083.

### 2.3.8 (*R*)-*N*-((*R*)-(3-(benzyloxy)-2-(dicyclohexylphosphaneyl)-4-methoxyphenyl)(3,5bis(trifluoromethyl)phenyl)methyl)-2-methylpropane-2-sulfinamide

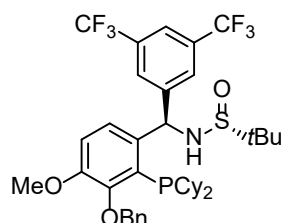

(*R*, *Rs*)-**Xu9-7**

To a solution of 1-bromo-3,5-bis(trifluoromethyl)benzene (4 mmol) in dry THF (4 mL) was added *n*-BuLi (4 mmol, 2.4 M in hexane) dropwise under argon at -78 °C. The resulting solution at this temperature during 1 hour and the **Xu8-6** (2 mmol) in 2 mL anhydrous THF was added dropwise. Then the reaction mixture was warmed to room temperature overnight and was quenched by the addition of  $\text{NH}_4\text{Cl}$  (aq.) and diluted with EtOAc. The organic layer was separated, and the aqueous layer was extracted twice with EtOAc. The combined organic layers were dried over  $\text{Na}_2\text{SO}_4$ , filtered, concentrated and purified by flash column chromatography on silica gel (petroleum ether: ethyl acetate = 5: 1) to the product (*R*, *Rs*)-**Xu9-7** as a white solid (720 mg, 48% yield). Mp: 79.2-81.1 °C.  $[\alpha]_{\text{D}}^{20} = -3.5$  ( $c = 0.4$ , Chloroform).  $^1\text{H}$  NMR (400 MHz, Chloroform-*d*)  $\delta$  7.98 – 7.89 (m, 2H), 7.70 (s, 1H), 7.47 – 7.42 (m, 2H), 7.40 (t,  $J = 7.5$  Hz, 2H), 7.37 – 7.29 (m, 1H), 7.27 – 7.23 (m, 1H), 7.04 (d,  $J = 8.5$  Hz, 1H), 6.87 (dd,  $J = 9.1, 4.5$  Hz, 1H), 5.25 (d,  $J = 11.6$  Hz, 1H), 5.16 (d,  $J = 11.6$  Hz, 1H), 4.24 (s, 1H), 3.84 (s, 3H), 2.32 – 2.16 (m, 2H), 1.75 – 1.49 (m, 8H), 1.42 (q,  $J = 3.5, 2.5$  Hz, 1H), 1.27 (d,  $J = 8.3$  Hz, 11H), 1.06 (ddd,  $J = 31.2, 15.6, 7.6$  Hz, 9H).  $^{13}\text{C}$  NMR (125 MHz, Chloroform-*d*)  $\delta$  151.3 (d,  $J = 3.5$  Hz), 151.2, 146.1, 141.5 (d,  $J = 24.3$  Hz), 138.3, 131.2 (q,  $J = 33.2$  Hz), 128.9, 128.3, 127.5, 127.1, 124.5, 122.6 (d,  $J = 7.2$  Hz), 122.3, 120.8, 114.7, 73.6, 59.7 (d,  $J = 31.4$  Hz), 56.3, 55.6, 35.3 (d,  $J = 10.2$  Hz), 34.7 (d,  $J = 10.0$  Hz), 33.1 (d,  $J = 25.4$  Hz), 32.4 (d,  $J = 22.5$  Hz), 30.7 (d,  $J = 9.7$  Hz), 30.6 (d,  $J = 7.2$  Hz), 27.1, 27.0, 26.9 (d,  $J = 4.6$  Hz), 26.8 (d,  $J = 3.4$  Hz), 26.6, 26.1, 22.8.  $^{31}\text{P}$  NMR (202 MHz, Chloroform-*d*)  $\delta$  -6.70.  $^{19}\text{F}$  NMR (376

MHz, Chloroform-*d*)  $\delta$  -62.79. HRMS (ESI) calculated for [C<sub>39</sub>H<sub>49</sub>F<sub>6</sub>NO<sub>3</sub>PS] [M+H]<sup>+</sup>: 756.3069 found: 756.3072.

### 2.3.9 (*R*)-N-((*S*)-[1,1'-biphenyl]-4-yl(3-(benzyloxy)-2-(dicyclohexylphosphanyl)-4-methoxyphenyl)methyl)-N,2-dimethylpropane-2-sulfinamide (**Xu8**)

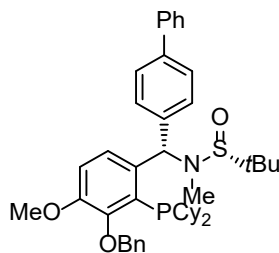

**Xu8**

Prepared from (*R*)-N-((*S*)-[1,1'-biphenyl]-4-yl(3-(benzyloxy)-2-(dicyclohexylphosphanyl)-4-methoxyphenyl)methyl)-N,2-dimethylpropane-2-sulfinamide **Xu8-7** (0.5 mmol) in 2 mL anhydrous THF, was added *n*-BuLi (0.75 mmol, 1.6 M in hexane) dropwise under argon at -40 °C. The resulting solution at this temperature during 1 hour and iodomethane (1 mmol, 2 equiv.) was added. After 1 hour, the reaction mixture moved to 0 °C and stirred 1 hour. The reaction mixture was the addition of NH<sub>4</sub>Cl (aq.) and diluted with EtOAc. The organic layer was separated, and the aqueous layer was extracted twice with EtOAc. The combined organic layers were dried over Na<sub>2</sub>SO<sub>4</sub>, filtered, concentrated and purified by flash column chromatography on silica gel (petroleum ether: ethyl acetate = 5: 1) to the product **Xu8** as a white solid (245 mg, 69% yield). Mp: 86.0-87.2 °C. [ $\alpha$ ]<sub>D</sub><sup>20</sup> = 11.3 (*c* = 0.4, Chloroform). <sup>1</sup>H NMR (500 MHz, Chloroform-*d*)  $\delta$  7.59 – 7.52 (m, 3 H), 7.50 – 7.44 (m, 4 H), 7.45 – 7.35 (m, 4 H), 7.35 – 7.28 (m, 2 H), 7.28 – 7.21 (m, 2 H), 7.09 (d, *J* = 8.6 Hz, 1 H), 7.03 (d, *J* = 11.4 Hz, 1 H), 5.21 (s, 2 H), 3.87 (s, 3 H), 2.64 (s, 3 H), 2.45 – 2.30 (m, 1 H), 2.13 – 1.97 (m, 1 H), 1.75 – 1.54 (m, 5 H), 1.54 – 1.44 (m, 1 H), 1.41 – 1.35 (m, 2 H), 1.24 – 1.14 (m, 4 H), 1.14 – 1.02 (m, 11 H), 0.99 – 0.69 (m, 6 H). <sup>13</sup>C NMR (125 MHz, Chloroform-*d*)  $\delta$  150.9 (d, *J* = 3.8 Hz), 150.4, 140.9, 140.4 (d, *J* = 22.9 Hz), 139.8, 139.4, 138.6, 131.7, 128.6, 128.6 (d, *J* = 30.9 Hz), 128.1, 127.3, 127.1, 127.02, 127.01, 126.3, 122.9 (d, *J* = 5.7 Hz), 113.9, 73.3, 70.5 (d, *J* = 39.9 Hz), 58.6, 55.5, 35.2 (d, *J* = 10.4 Hz), 34.0 (d, *J* = 11.6 Hz), 33.2 (d, *J* = 26.1 Hz), 32.2 (d, *J* = 22.3 Hz), 30.9 (d, *J* = 11.5 Hz), 30.5, 29.9 (d, *J* = 8.0 Hz), 27.0 (t, *J* = 9.4 Hz), 26.8 (d, *J* = 2.9

Hz), 26.7 (d,  $J = 4.8$  Hz), 26.3, 26.0, 24.1.  $^{31}\text{P}$  NMR (202 MHz, Chloroform- $d$ )  $\delta$  -6.11. HRMS (ESI) calculated for  $[\text{C}_{44}\text{H}_{56}\text{NNaO}_3\text{PS}]$   $[\text{M}+\text{Na}]^+$ : 732.3611 found: 732.3614.

### 2.3.10 (*R*)-*N*-((*S*)-(3-(benzyloxy)-2-(dicyclohexylphosphaneyl)-4-methoxyphenyl)(3,5-bis(trifluoromethyl)phenyl)methyl)-*N*,2-dimethylpropane-2-sulfinamide (**Xu9**)

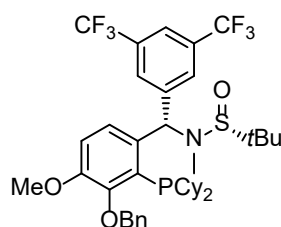

**Xu9**

Prepared from (*R*)-*N*-((*S*)-(3-(benzyloxy)-2-(dicyclohexylphosphaneyl)-4-methoxyphenyl)(3,5-bis(trifluoromethyl)phenyl)methyl)-2-methylpropane-2-sulfinamide **Xu9-7** (0.5 mmol) in 2 mL anhydrous THF, was added *n*-BuLi (0.75 mmol, 1.6 M in hexane) dropwise under argon at  $-40$  °C. The resulting solution at this temperature during 1 hour and iodomethane (1 mmol, 2 equiv.) was added. After 1 hour, the reaction mixture moved to  $0$  °C and stirred 1 hour. The reaction mixture was the addition of  $\text{NH}_4\text{Cl}$  (aq.) and diluted with EtOAc. The organic layer was separated, and the aqueous layer was extracted twice with EtOAc. The combined organic layers were dried over  $\text{Na}_2\text{SO}_4$ , filtered, concentrated and purified by flash column chromatography on silica gel (petroleum ether: ethyl acetate = 5: 1) to the product **Xu9** as a white solid (230 mg, 60% yield). Mp:  $146$ - $148.5$  °C.  $[\alpha]_D^{20} = 45.9$  ( $c = 0.4$ , Chloroform).  $^1\text{H}$  NMR (500 MHz, Chloroform- $d$ )  $\delta$  7.72 (s, 1H), 7.65 (s, 2H), 7.57 (dd,  $J = 8.6, 4.1$  Hz, 1H), 7.45 (d,  $J = 7.6$  Hz, 2H), 7.39 (t,  $J = 7.5$  Hz, 2H), 7.31 (t,  $J = 7.4$  Hz, 1H), 7.11 (d,  $J = 10.1$  Hz, 2H), 5.22 (s, 2H), 3.88 (s, 3H), 2.65 (s, 3H), 2.32 (q,  $J = 10.8$  Hz, 1H), 2.08 (q,  $J = 11.3$  Hz, 1H), 1.68 (d,  $J = 9.1$  Hz, 3H), 1.61 (d,  $J = 9.8$  Hz, 3H), 1.52 – 1.39 (m, 3H), 1.36 (d,  $J = 12.5$  Hz, 1H), 1.25 – 1.14 (m, 4H), 1.07 (s, 10H), 0.96 – 0.73 (m, 5H).  $^{13}\text{C}$  NMR (125 MHz, Chloroform- $d$ )  $\delta$  151.3 (d,  $J = 3.8$  Hz), 151.1, 143.6, 138.4, 138.0 (d,  $J = 22.8$  Hz), 131.6, 131.0 (q,  $J = 33.1$  Hz), 128.5 (d,  $J = 30.7$  Hz), 128.3, 127.5, 127.1, 124.4, 122.8 (d,  $J = 5.5$  Hz), 122.2, 120.9, 114.3, 73.6, 70.2 (d,  $J = 41.2$  Hz), 59.2, 55.5, 35.3 (d,  $J = 10.0$  Hz), 33.8 (d,  $J = 10.8$  Hz), 33.2 (d,  $J = 26.2$  Hz), 32.2 (d,  $J = 21.8$  Hz), 31.0, 30.9, 30.2 (d,  $J = 7.5$  Hz), 27.0 (d,  $J = 9.5$  Hz), 26.8 – 26.6 (m), 26.6, 26.3, 26.0, 24.1.  $^{31}\text{P}$  NMR (202 MHz, Chloroform- $d$ )  $\delta$  -5.88.

$^{19}\text{F}$  NMR (376 MHz, Chloroform-*d*)  $\delta$  -62.83. HRMS (ESI) calculated for  $[\text{C}_{40}\text{H}_{51}\text{F}_6\text{NO}_3\text{PS}]$   $[\text{M}+\text{H}]^+$ : 770.3226 found: 770.3246.

### 2.3.11 (*R*)-*N*-((*R*)-(3-(benzyloxy)-2-(dicyclohexylphosphaneyl)-4-methoxyphenyl)(3,5-bis(trifluoromethyl)phenyl)methyl)-*N*,2-dimethylpropane-2-sulfinamide ((*R*, *R*<sub>S</sub>)-**Xu9**)

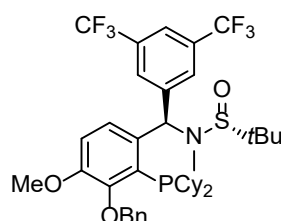

(*R*, *R*<sub>S</sub>)-**Xu9**

Prepared from (*R*)-*N*-((*R*)-(3-(benzyloxy)-2-(dicyclohexylphosphaneyl)-4-methoxyphenyl)(3,5-bis(trifluoromethyl)phenyl)methyl)-2-methylpropane-2-sulfinamide (**(*R*, *R*<sub>S</sub>)-Xu9-7**) (0.5 mmol) in 2 mL anhydrous THF, was added *n*-BuLi (0.75 mmol, 1.6 M in hexane) dropwise under argon at -40 °C. The resulting solution at this temperature during 1 hour and iodomethane (1 mmol, 2 equiv.) was added. After 1 hour, the reaction mixture moved to 0 °C and stirred 1 hour. The reaction mixture was the addition of NH<sub>4</sub>Cl (aq.) and diluted with EtOAc. The organic layer was separated, and the aqueous layer was extracted twice with EtOAc. The combined organic layers were dried over Na<sub>2</sub>SO<sub>4</sub>, filtered, concentrated and purified by flash column chromatography on silica gel (petroleum ether: ethyl acetate = 5: 1) to the product (**(*R*, *R*<sub>S</sub>)-Xu9**) as a white solid (238 mg, 62% yield). Mp: 67.5-70.1 °C.  $[\alpha]_{\text{D}}^{20} = -23.4$  ( $c = 0.4$ , Chloroform).  $^1\text{H}$  NMR (400 MHz, Chloroform-*d*)  $\delta$  7.80 (s, 2H), 7.70 (s, 1H), 7.48 – 7.27 (m, 6H), 7.10 (d,  $J = 8.6$  Hz, 1H), 6.93 (d,  $J = 9.9$  Hz, 1H), 5.29 – 5.09 (m, 2H), 3.87 (s, 3H), 2.60 (s, 3H), 2.31 (dtt,  $J = 11.7, 8.5, 3.4$  Hz, 1H), 2.11 – 1.95 (m, 1H), 1.71 – 1.57 (m, 5H), 1.52 (ddd,  $J = 12.1, 4.8, 2.4$  Hz, 2H), 1.39 – 1.30 (m, 2H), 1.30 – 1.21 (m, 3H), 1.18 (s, 9H), 1.11 – 1.02 (m, 2H), 0.93 – 0.83 (m, 4H), 0.82 – 0.72 (m, 2H).  $^{13}\text{C}$  NMR (100 MHz, Chloroform-*d*)  $\delta$  151.3 (d,  $J = 3.6$  Hz), 150.9, 143.9, 138.4, 140.1 (d,  $J = 23.1$  Hz), 131.3, 131.7 – 130.6 (m), 128.7 (d,  $J = 32.3$  Hz), 128.2, 127.5, 127.0, 124.7, 121.9 (d,  $J = 6.2$  Hz), 121.1 – 120.5 (m). 114.2, 73.5, 58.9, 55.5, 35.6 (d,  $J = 10.6$  Hz), 34.2 (d,  $J = 11.5$  Hz), 33.1 (d,  $J = 26.7$  Hz), 32.2 (d,  $J = 22.3$  Hz), 31.0 (d,  $J = 11.0$  Hz), 29.9 (d,  $J = 7.1$  Hz), 26.9 (ddd,  $J = 21.0, 17.3,$



8.4 Hz).  $^{31}\text{P}$  NMR (162 MHz, Chloroform-*d*)  $\delta$  -6.86.  $^{19}\text{F}$  NMR (376 MHz, Chloroform-*d*)  $\delta$  -62.76. HRMS (ESI) calculated for  $[\text{C}_{40}\text{H}_{51}\text{F}_6\text{NO}_3\text{PS}]$   $[\text{M}+\text{H}]^+$ : 770.3226 found: 770.3241.

## 2.4 Synthesis of Xu10

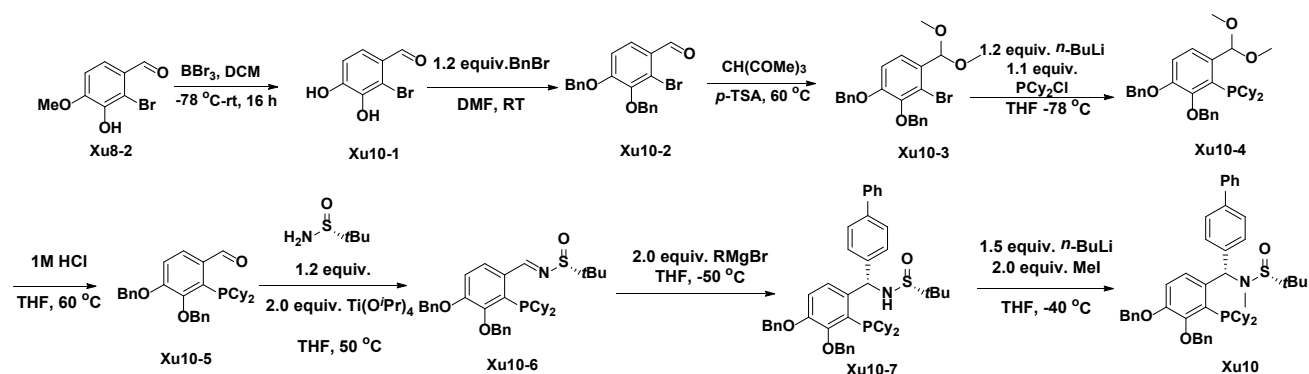

### 2.4.1 2-bromo-3,4-dihydroxybenzaldehyde (Xu10-1)

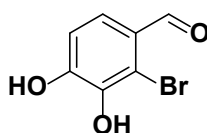

**Xu10-1**

To a solution of 2-bromo-3,4-dihydroxybenzaldehyde **Xu8-2** (3.45g, 15 mmol) in anhydrous  $\text{CH}_2\text{Cl}_2$  (60 mL) at  $-78^\circ\text{C}$  was added  $\text{BBr}_3$  (1M in  $\text{CH}_2\text{Cl}_2$ , 60 mL, 60 mmol). The mixture was warmed up to  $25^\circ\text{C}$  and stirred for 16 h. Then the solution was cooled down to  $-78^\circ\text{C}$  and MeOH (35 mL) was added. The mixture was poured into water (100 mL) and extracted with EtOAc (3 x 100 mL). Combined organic fractions were washed with brine (100 mL), dried over  $\text{MgSO}_4$ , filtered, and the solvent was evaporated. The residue was added to next step.

### 2.4.2 3,4-bis(benzyloxy)-2-bromobenzaldehyde (Xu10-2)

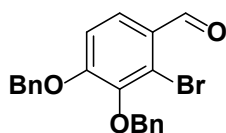

**Xu10-2**

Prepared from 2-bromo-3,4-dihydroxybenzaldehyde **Xu10-1** (10 mmol) in DMF (20 mL) was added benzyl bromide (30 mmol, 3 equiv.) and  $\text{K}_2\text{CO}_3$  (30 mmol, 3 equiv.). The resulting solution was stirred at room temperature overnight. The reaction mixture was quenched by the addition of

H<sub>2</sub>O and diluted with EtOAc. The organic layer was separated, and the aqueous layer was extracted twice with EtOAc. The combined organic layers were dried over Na<sub>2</sub>SO<sub>4</sub>, filtered, concentrated. The crude product was then washed by petroleum ether with a little ethyl acetate to afford the product **Xu10-2** as a white solid (1.5 g, 38% yield). Mp: 136.5-137.4 °C. <sup>1</sup>H NMR (400 MHz, Chloroform-*d*) δ 10.24 (s, 1H), 7.70 (d, *J* = 8.6 Hz, 1H), 7.54 – 7.28 (m, 10H), 7.01 (d, *J* = 8.6 Hz, 1H), 5.18 (s, 2H), 5.04 (d, *J* = 1.7 Hz, 2H). <sup>13</sup>C NMR (100 MHz, Chloroform-*d*) δ 190.8, 157.7, 145.4, 136.5, 135.4, 128.7, 128.6, 128.4, 128.3, 128.2, 127.5, 127.4, 126.4, 123.6, 112.3, 74.8, 71.1. HRMS (ESI) calculated for [C<sub>21</sub>H<sub>17</sub>BrNaO<sub>3</sub>] [M+Na]<sup>+</sup>: 419.0253 found: 419.0242.

#### 2.4.3 (((3-bromo-4-(dimethoxymethyl)-1,2-phenylene)bis(oxy))bis(methylene))dibenzene (**Xu10-3**)

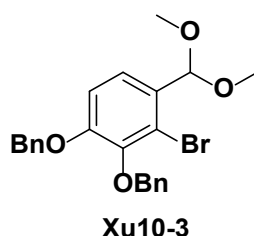

Prepared from 3,4-bis(benzyloxy)-2-bromobenzaldehyde (**Xu10-2**) (3 mmol) in trimethoxymethane (30 mmol, 10 equiv.) and *p*-toluenesulfonic acid (0.15 mmol, 5% mol). The resulting solution was stirred 5 hours at 60 °C. The reaction mixture was washed by the addition of NaHCO<sub>3</sub> (aq.) and the combined organic layers concentrated. The crude product was purified by flash column chromatography on aluminum oxide (petroleum ether: ethyl acetate = 20: 1) to afford the product **Xu10-3** as a white liquid (1.1 g, 83% yield). <sup>1</sup>H NMR (400 MHz, Chloroform-*d*) δ 7.41 (dd, *J* = 7.3, 2.2 Hz, 2H), 7.38 – 7.32 (m, 2H), 7.31 – 7.21 (m, 7H), 6.88 (d, *J* = 8.6 Hz, 1H), 5.46 (s, 1H), 5.05 (s, 2H), 4.96 (s, 2H), 3.29 (s, 6H). <sup>13</sup>C NMR (100 MHz, Chloroform-*d*) δ 153.0, 145.7, 137.1, 136.5, 130.5, 129.9, 128.6, 128.6, 128.3, 128.2, 128.1, 127.5, 123.5, 119.4, 112.8, 103.1, 74.7, 71.2, 54.0. HRMS (ESI) calculated for [C<sub>23</sub>H<sub>23</sub>BrNaO<sub>4</sub>] [M+Na]<sup>+</sup>: 465.0672 found: 465.0682.

#### 2.4.4 (2,3-bis(benzyloxy)-6-(dimethoxymethyl)phenyl)dicyclohexylphosphane (**Xu10-4**)

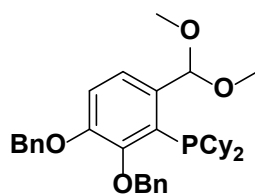

**Xu10-4**

Prepared from (((3-bromo-4-(dimethoxymethyl)-1,2-phenylene)bis(oxy))bis(methylene))dibenzene (**Xu10-3**) (2 mmol) in 4 mL anhydrous THF, was added *n*-BuLi (2.4 mmol, 1.6 M in hexane) dropwise under argon at -78 °C, The resulting solution at this temperature during 1 hour, and dicyclohexylchlorophosphine (2.6 mmol, 1.3 equiv.) was added dropwise. The reaction mixture was warmed to room temperature overnight. The reaction mixture was quenched by the addition of NaHCO<sub>3</sub> (aq.) and diluted with EtOAc. The organic layer was separated, and the aqueous layer was extracted twice with EtOAc. The combined organic layers were concentrated. The crude product was purified by flash column chromatography on aluminum oxide (petroleum ether: ethyl acetate = 20: 1) to afford the crude product **Xu10-4** as a yellow liquid. <sup>1</sup>H NMR (400 MHz, Chloroform-*d*) δ 7.43 – 7.27 (m, 12H), 7.09 (d, *J* = 8.6 Hz, 1H), 6.28 (d, *J* = 7.6 Hz, 1H), 5.25 (s, 2H), 5.09 (s, 2H), 3.36 (s, 6H), 2.35 (dtt, *J* = 11.7, 7.9, 3.7 Hz, 2H), 1.78 (d, *J* = 12.5 Hz, 2H), 1.68 (d, *J* = 11.1 Hz, 2H), 1.62 – 1.57 (m, 4H), 1.35 (d, *J* = 15.3 Hz, 3H), 1.29 (s, 1H), 1.25 (s, 1H), 1.13 (d, *J* = 10.1 Hz, 5H), 1.03 – 0.91 (m, 2H). <sup>13</sup>C NMR (100 MHz, Chloroform-*d*) δ 150.6, 138.5, 136.6, 128.5, 128.2, 128.0, 127.6, 127.4, 127.2, 121.4 (d, *J* = 7.1 Hz), 115.8, 102.5, 102.1, 73.5, 71.2, 53.9, 34.6 (d, *J* = 10.8 Hz), 32.8 (d, *J* = 23.7 Hz), 30.9 (d, *J* = 10.3 Hz), 27.0 (d, *J* = 8.9 Hz), 26.8 (d, *J* = 13.8 Hz), 26.3. <sup>31</sup>P NMR (162 MHz, Chloroform-*d*) δ -6.73. HRMS (ESI) calculated for [C<sub>35</sub>H<sub>46</sub>O<sub>4</sub>P] [M+H]<sup>+</sup>: 561.3128 found: 561.3128.

#### 2.4.5 3,4-bis(benzyloxy)-2-(dicyclohexylphosphanyl)benzaldehyde (**Xu10-5**)

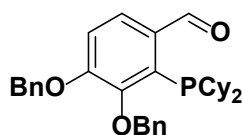

**Xu10-5**

Prepared from (2,3-bis(benzyloxy)-6-(dimethoxymethyl)phenyl)dicyclohexylphosphane (**Xu10-4**) in 2 mL THF, was added 1 mL HCl (1.0 M) under argon at 60 °C. The resulting solution was stirred 5 hours. The reaction mixture was quenched by the addition of NaHCO<sub>3</sub> (aq.) and diluted

with EtOAc. The organic layer was separated, and the aqueous layer was extracted twice with EtOAc. The combined organic layers were dried over Na<sub>2</sub>SO<sub>4</sub>, filtered, concentrated and purified by flash column chromatography on silica gel (petroleum ether: ethyl acetate = 20: 1) to afford the product **Xu10-5** as a yellow liquid. <sup>1</sup>H NMR (400 MHz, Chloroform-*d*) δ 11.06 (d, *J* = 8.7 Hz, 1H), 7.76 (dd, *J* = 8.6, 3.1 Hz, 1H), 7.46 – 7.28 (m, 10H), 7.15 (d, *J* = 8.6 Hz, 1H), 5.22 (s, 2H), 5.17 (s, 2H), 2.36 (tdt, *J* = 11.4, 7.4, 3.4 Hz, 2H), 1.85 – 1.78 (m, 2H), 1.71 (t, *J* = 5.2 Hz, 2H), 1.59 (d, *J* = 8.1 Hz, 4H), 1.34 (d, *J* = 3.4 Hz, 2H), 1.26 (s, 2H), 1.16 (d, *J* = 8.2 Hz, 6H), 1.04 – 0.92 (m, 2H). <sup>13</sup>C NMR (100 MHz, Chloroform-*d*) δ 193.41 (d, *J* = 41.3 Hz), 155.1, 151.0, 137.9, 135.8, 128.7, 128.4, 128.3, 127.7, 127.5, 124.3 (d, *J* = 6.0 Hz), 115.0, 73.9, 71.0, 34.6 (d, *J* = 11.0 Hz), 32.6, 32.4, 31.5, 31.0, 30.9, 30.2, 29.7, 26.9, 26.8, 26.8, 26.6, 26.2. <sup>31</sup>P NMR (162 MHz, Chloroform-*d*) δ -13.80. HRMS (ESI) calculated for [C<sub>33</sub>H<sub>40</sub>O<sub>3</sub>P] [M+H]<sup>+</sup>: 515.2710 found: 515.2724.

#### 2.4.6 (*R, E*)-*N*-(3,4-bis(benzyloxy)-2-(dicyclohexylphosphaneyl)benzylidene)-2-methylpropane-2-sulfinamide (**Xu10-6**)

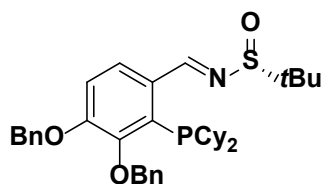

**Xu10-6**

Prepared from 3,4-bis(benzyloxy)-2-(dicyclohexylphosphaneyl)benzaldehyde (**Xu10-5**) in 2 mL THF, was added (*R*)-2-methylpropane-2-sulfinamide (2.4 mmol, 1.2 equiv.) and titanium tetraisopropanolate (4 mmol, 2.0 equiv.) under argon at 50 °C. The resulting solution was stirred 8 hours. The reaction mixture was quenched by the addition of H<sub>2</sub>O (aq.) and diluted with EtOAc. The solution was filtered and the residue was washed twice with EtOAc. The combined organic layers were dried over Na<sub>2</sub>SO<sub>4</sub>, filtered, concentrated and purified by flash column chromatography on silica gel (petroleum ether: ethyl acetate = 10: 1) to afford the crude product **Xu10-6** as a yellow solid. Mp: 63.7-65.2 °C. [α]<sub>D</sub><sup>20</sup> = -66.1 (*c* = 0.4, Chloroform). <sup>1</sup>H NMR (500 MHz, Chloroform-*d*) δ 9.66 (s, 1H), 7.86 (dd, *J* = 8.9, 2.6 Hz, 1H), 7.53 – 7.30 (m, 10H), 7.14 (dd, *J* = 8.7, 1.9 Hz, 1H), 5.31 – 5.09 (m, 4H), 2.42 – 2.24 (m, 2H), 1.83 (d, *J* = 12.8 Hz, 2H), 1.72 (s, 2H), 1.60 (d, *J* = 6.8 Hz, 4H), 1.38 (dd, *J* = 16.8, 7.0 Hz, 2H), 1.29 (d, *J* = 2.0 Hz, 11H), 1.18 (d, *J* = 7.9 Hz, 6H), 1.07 – 0.96 (m, 2H). <sup>13</sup>C NMR (125 MHz, Chloroform-*d*) δ 163.94 (d, *J* = 34.5 Hz), 153.76, 151.56, 138.00, 136.11, 134.97, 133.35 (d, *J* = 36.4 Hz), 128.67, 128.35, 128.28, 128.25, 127.68, 127.65,

124.30, 115.32, 74.08, 71.02, 57.64, 34.97 (d,  $J = 12.1$  Hz), 32.45 (d,  $J = 23.4$  Hz), 31.55, 30.77 (t,  $J = 10.2$  Hz), 30.19, 29.73, 26.94 (d,  $J = 8.6$  Hz), 26.79 (d,  $J = 6.4$  Hz), 26.68 (d,  $J = 5.8$  Hz), 26.28, 22.72.  $^{31}\text{P}$  NMR (203 MHz,  $\text{CDCl}_3$ )  $\delta$  -9.13. HRMS (ESI) calculated for  $[\text{C}_{37}\text{H}_{49}\text{NO}_3\text{PS}]$   $[\text{M}+\text{H}]^+$ : 618.3165 found: 618.3179.

**2.4.7 (R)-N-((S)-[1,1'-biphenyl]-4-yl(3,4-bis(benzyloxy)-2-(dicyclohexylphosphaneyl)phenyl)methyl)-2-methylpropane-2-sulfinamide (Xu10-7)**

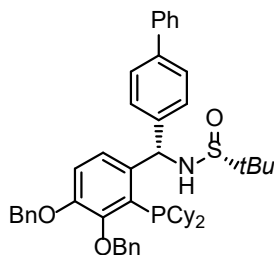

**Xu10-7**

Prepared from (R, E)-N-(3,4-bis(benzyloxy)-2-(dicyclohexylphosphaneyl)benzylidene)-2-Methylpropane-2-sulfinamide (**Xu10-6**) in 1 mL anhydrous THF, was added [1,1'-biphenyl]-4-ylmagnesium bromide (1 mmol, 2.0 equiv.) dropwise under argon at  $-50$  °C. The reaction mixture was warmed to room temperature overnight and was quenched by the addition of  $\text{NH}_4\text{Cl}$  (aq.) and diluted with EtOAc. The organic layer was separated, and the aqueous layer was extracted twice with EtOAc. The combined organic layers were dried over  $\text{Na}_2\text{SO}_4$ , filtered, concentrated and purified by flash column chromatography on silica gel (petroleum ether: ethyl acetate = 5: 1) to the product **Xu10-7** as a white solid (262 mg, 68% yield). Mp: 85-86.5 °C.  $[\alpha]_D^{20} = -64.6$  ( $c = 0.4$ , Chloroform).  $^1\text{H}$  NMR (400 MHz, Chloroform- $d$ )  $\delta$  7.56 – 7.44 (m, 6H), 7.44 – 7.26 (m, 14H), 7.13 (d,  $J = 8.6$  Hz, 1H), 6.93 (d,  $J = 9.4$  Hz, 1H), 5.31 (d,  $J = 11.6$  Hz, 1H), 5.20 (d,  $J = 11.6$  Hz, 1H), 5.09 (s, 2H), 3.98 (s, 1H), 2.36 – 2.12 (m, 2H), 1.75 – 1.51 (m, 6H), 1.50 – 1.41 (m, 1H), 1.26 (s, 22H).  $^{13}\text{C}$  NMR (100 MHz, Chloroform- $d$ )  $\delta$  151.4, 149.7, 142.4, 141.0, 140.1, 138.4, 136.6, 129.2 (d,  $J = 2.2$  Hz), 128.7, 128.5, 128.1, 128.0, 127.7, 127.3, 127.1, 127.1, 127.0, 123.2 (d,  $J = 4.2$  Hz), 115.9, 73.4, 71.1, 55.9, 35.3 (d,  $J = 10.8$  Hz), 34.4 (d,  $J = 11.6$  Hz), 33.2 (d,  $J = 25.9$  Hz), 32.3 (d,  $J = 22.7$  Hz), 30.4 (dd,  $J = 18.4, 8.9$  Hz), 27.7 – 26.4 (m), 26.2, 22.8.  $^{31}\text{P}$  NMR (162 MHz, Chloroform- $d$ )  $\delta$  -6.59. HRMS (ESI) calculated for  $[\text{C}_{49}\text{H}_{59}\text{NO}_3\text{PS}]$   $[\text{M}+\text{H}]^+$ : 772.3948 found: 772.3967.

#### 2.4.8 (R)-N-((S)-[1,1'-biphenyl]-4-yl(3,4-bis(benzyloxy)-2-(dicyclohexylphosphaneyl)phenyl)methyl)-N,2-dimethylpropane-2-sulfinamide (Xu10)

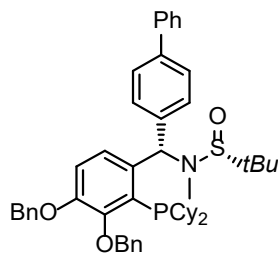

**Xu10**

Prepared from (R)-N-((S)-[1,1'-biphenyl]-4-yl(3,4-bis(benzyloxy)-2-(dicyclohexylphosphaneyl)phenyl)methyl)-2-methylpropane-2-sulfinamide (Xu10-7) in 1 mL anhydrous THF, was added *n*-BuLi (0.5 mmol, 1.6 M in hexane) dropwise under argon at -40 °C. The resulting solution at this temperature during 1 hour and iodomethane (0.6 mmol, 2 equiv.) was added. After 1 hour, the reaction mixture moved to 0 °C and stirred 1 hour. The reaction mixture was the addition of NH<sub>4</sub>Cl (aq.) and diluted with EtOAc. The organic layer was separated, and the aqueous layer was extracted twice with EtOAc. The combined organic layers were dried over Na<sub>2</sub>SO<sub>4</sub>, filtered, concentrated and purified by flash column chromatography on silica gel (petroleum ether: ethyl acetate = 5: 1) to the product **Xu10** as a white solid (170 mg, 72% yield). Mp: 72-74.7 °C. [ $\alpha$ ]<sub>D</sub><sup>20</sup> = 14.7 (*c* = 0.4, Chloroform). <sup>1</sup>H NMR (400 MHz, Chloroform-*d*)  $\delta$  7.54 (ddd, *J* = 8.2, 5.3, 2.9 Hz, 3H), 7.46 (d, *J* = 8.2 Hz, 2H), 7.43 – 7.28 (m, 12H), 7.25 (dd, *J* = 8.4, 4.1 Hz, 2H), 7.16 (d, *J* = 8.6 Hz, 1H), 7.03 (d, *J* = 11.4 Hz, 1H), 5.25 (s, 2H), 5.10 (s, 2H), 2.64 (s, 3H), 2.35 (dq, *J* = 11.3, 7.2, 4.8, 3.1 Hz, 1H), 2.06 (dt, *J* = 11.7, 8.4, 3.4 Hz, 1H), 1.71 – 1.57 (m, 5H), 1.50 (dd, *J* = 10.8, 6.4 Hz, 1H), 1.41 – 1.34 (m, 2H), 1.21 (td, *J* = 15.5, 14.6, 5.7 Hz, 5H), 1.09 (s, 9H), 0.98 – 0.82 (m, 6H), 0.77 (tt, *J* = 12.3, 3.3 Hz, 1H). <sup>13</sup>C NMR (100 MHz, Chloroform-*d*)  $\delta$  151.6 (d, *J* = 3.7 Hz), 149.6, 141.2 (d, *J* = 23.0 Hz), 141.1, 139.9, 139.5, 138.5, 136.7, 131.8, 129.1, 128.8, 128.7, 128.5, 128.2, 128.0, 127.8, 127.4, 127.2, 127.1, 127.0, 126.5, 122.9 (d, *J* = 5.7 Hz), 116.2, 73.5, 71.3, 70.6 (d, *J* = 39.9 Hz), 58.7, 35.3 (d, *J* = 10.4 Hz), 34.7, 34.1 (d, *J* = 11.7 Hz), 33.3 (d, *J* = 26.3 Hz), 32.3 (d, *J* = 22.4 Hz), 31.0 (d, *J* = 11.6 Hz), 30.6, 30.0 (d, *J* = 8.0 Hz), 27.2 – 26.6 (m), 26.2, 25.3, 24.2. <sup>31</sup>P NMR (162 MHz, Chloroform-*d*)  $\delta$  -5.94. HRMS (ESI) calculated for [C<sub>50</sub>H<sub>61</sub>NO<sub>3</sub>PS] [M+H]<sup>+</sup>: 786.4104 found: 786.4118.

#### 2.5 Synthesis of Xu12, Xu13

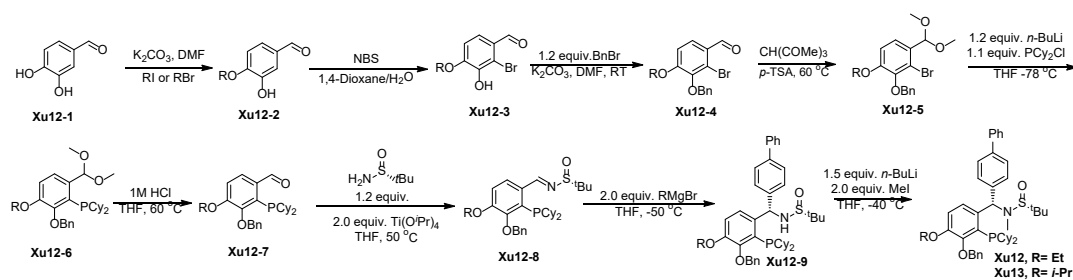

### 2.5.1 4-ethoxy-3-hydroxybenzaldehyde (Xu12-2)

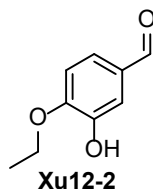

Prepared from 3,4-dihydroxybenzaldehyde **Xu12-1** (30 mmol) in DMF (50 mL) was added iodoethane (33mmol, 1.1 equiv.) and  $K_2CO_3$  (33 mmol, 1.1 equiv.). The resulting solution was stirred at 0 °C 48 h. The reaction mixture was quenched by the addition of  $H_2O$  and diluted with EtOAc. The organic layer was separated, and the aqueous layer was extracted twice with EtOAc. The combined organic layers were dried over  $Na_2SO_4$ , filtered, concentrated. the crude product was then purified by flash column chromatography on silica gel (petroleum ether: ethyl acetate = 5: 1) to afford the product **Xu12-2** as a white liquid (2.7 g, 55% yield).  $^1H$  NMR (400 MHz, Chloroform-*d*)  $\delta$  9.84 (s, 1H), 7.44 (d,  $J = 1.9$  Hz, 1H), 7.41 (dd,  $J = 8.2, 1.9$  Hz, 1H), 6.95 (d,  $J = 8.2$  Hz, 1H), 5.86 (s, 1H), 4.22 (q,  $J = 7.0$  Hz, 2H), 1.50 (t,  $J = 7.0$  Hz, 3H).  $^{13}C$  NMR (100 MHz, Chloroform-*d*)  $\delta$  191.0, 151.1, 146.2, 130.5, 124.5, 114.1, 110.8, 64.9, 14.6. HRMS (ESI) calculated for  $[C_9H_{11}O_3]$   $[M+H]^+$ : 167.0704 found: 167.0703.

### 2.5.2 3-hydroxy-4-isopropoxybenzaldehyde (Xu13-2)

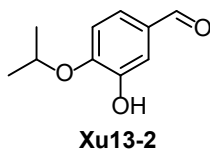

Prepared from a stirred suspension of 3,4-dihydrobenzaldehyde **Xu12-1** (30 mmol), KI (3 mmol) and anhydrous potassium carbonate(30 mmol) in dry DMF (60 ml) was heated to 40°C and 2-bromopropane (39 mmol) added dropwise under nitrogen during 1.0 h. The mixture was stirred for a further 12 h and cooled to room temperature. The reaction mixture was quenched by the addition of  $H_2O$  and diluted with EtOAc. The organic layer was separated, and the aqueous layer was extracted twice with EtOAc. The combined organic layers were dried over  $Na_2SO_4$ , filtered,

concentrated. the crude product was then purified by flash column chromatography on silica gel (petroleum ether: ethyl acetate = 10: 1) to afford the product **Xu13-2** as a white liquid (2.8 g, 52% yield). <sup>1</sup>H NMR (400 MHz, Chloroform-*d*) δ 9.82 (s, 1H), 7.95 – 7.27 (m, 2H), 6.96 (d, *J* = 8.3 Hz, 1H), 6.06 (s, 1H), 4.74 (h, *J* = 6.1 Hz, 1H), 1.42 (d, *J* = 6.1 Hz, 6H). <sup>13</sup>C NMR (101 MHz, CDCl<sub>3</sub>) δ 191.0, 150.1, 146.7, 130.1, 124.3, 114.2, 111.9, 71.9, 21.9. HRMS (ESI) calculated for [C<sub>10</sub>H<sub>12</sub>NaO<sub>3</sub>] [M+Na]<sup>+</sup>: 203.0679 found: 203.0678.

### 2.5.3 2-bromo-4-ethoxy-3-hydroxybenzaldehyde (**Xu12-3**)

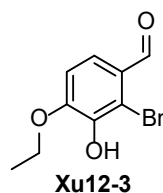

Prepared from 4-ethoxy-3-hydroxybenzaldehyde (**Xu12-2**) (15 mmol) in 1,4-Dioxane/H<sub>2</sub>O (v:v=1:1, 20 mL) was added NBS slowly (15.75 mmol, 1.05 equiv.). The resulting solution was stirred at room temperature overnight. The reaction mixture was diluted with EtOAc. The organic layer was separated, and the aqueous layer was extracted twice with EtOAc. The combined organic layers were dried over Na<sub>2</sub>SO<sub>4</sub>, filtered, concentrated. the crude product was then purified by flash column chromatography on silica gel (petroleum ether: ethyl acetate = 10: 1) to afford the product **Xu12-3** as a white liquid (2.4 g, 75% yield). <sup>1</sup>H NMR (400 MHz, Chloroform-*d*) δ 10.26 (s, 1H), 7.55 (d, *J* = 8.5 Hz, 1H), 6.90 (d, *J* = 8.5 Hz, 1H), 6.28 (s, 1H), 4.24 (q, *J* = 7.0 Hz, 2H), 1.51 (t, *J* = 7.0 Hz, 3H). <sup>13</sup>C NMR (100 MHz, Chloroform-*d*) δ 191.0, 151.0, 143.3, 127.0, 122.6, 112.8, 109.8, 65.4, 14.6. HRMS (ESI) calculated for [C<sub>9</sub>H<sub>9</sub>BrNaO<sub>3</sub>] [M+H]<sup>+</sup>: 266.9634 found: 266.9627.

### 2.5.4 2-bromo-3-hydroxy-4-isopropoxybenzaldehyde (**Xu13-3**)

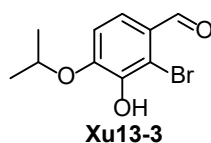

Prepared from 3-hydroxy-4-isopropoxybenzaldehyde (**Xu13-2**) (15 mmol) in 1,4-Dioxane/H<sub>2</sub>O (v:v=1:1, 20 mL) was added NBS slowly (15.75 mmol, 1.05 equiv.). The resulting solution was stirred at room temperature overnight. The reaction mixture was diluted with EtOAc. The organic layer was separated, and the aqueous layer was extracted twice with EtOAc. The combined organic layers were dried over Na<sub>2</sub>SO<sub>4</sub>, filtered, concentrated. the crude product was then purified by flash



column chromatography on silica gel (petroleum ether: ethyl acetate = 10: 1) to afford the product **Xu13-3** as a white liquid (3 g, 80% yield). <sup>1</sup>H NMR (400 MHz, Chloroform-*d*) δ 10.26 (s, 1H), 7.55 (d, *J* = 8.6 Hz, 1H), 6.90 (d, *J* = 8.5 Hz, 1H), 6.17 (s, 1H), 4.74 (p, *J* = 6.0 Hz, 1H), 1.43 (d, *J* = 6.0 Hz, 8H). <sup>13</sup>C NMR (100 MHz, CDCl<sub>3</sub>) δ 191.0, 150.0, 143.9, 126.9, 122.4, 112.9, 110.9, 72.7, 22.0.

### 2.5.5 3-(benzyloxy)-2-bromo-4-ethoxybenzaldehyde (**Xu12-4**)

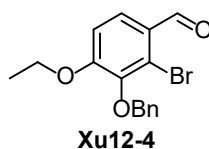

To a solution of 2-bromo-4-ethoxy-3-hydroxybenzaldehyde (**Xu12-3**) (10 mmol) in DMF (20 mL) was added benzyl bromide (12mmol, 1.2 equiv.) and K<sub>2</sub>CO<sub>3</sub> (15 mmol, 1.5 equiv.). The resulting solution was stirred at room temperature overnight. The reaction mixture was quenched by the addition of H<sub>2</sub>O and diluted with EtOAc. The organic layer was separated, and the aqueous layer was extracted twice with EtOAc. The combined organic layers were dried over Na<sub>2</sub>SO<sub>4</sub>, filtered, concentrated. The crude product was then washed by petroleum ether with a little ethyl acetate to afford the product **Xu12-4** as a white solid (2 g, 60% yield). Mp: 59.7 – 60.5 °C. <sup>1</sup>H NMR (400 MHz, Chloroform-*d*) δ 10.28 (s, 1H), 7.75 (d, *J* = 8.7 Hz, 1H), 7.67 – 7.51 (m, 2H), 7.50 – 7.31 (m, 4H), 6.97 (d, *J* = 8.7 Hz, 1H), 5.09 (s, 2H), 4.20 (q, *J* = 7.0 Hz, 2H), 1.53 (t, *J* = 7.0 Hz, 4H). <sup>13</sup>C NMR (101 MHz, CDCl<sub>3</sub>) δ 191.0, 158.1, 145.1, 136.7, 128.5, 128.4, 128.3, 127.2, 126.5, 123.5, 111.6, 74.7, 64.9, 14.6. HRMS (ESI) calculated for [C<sub>16</sub>H<sub>15</sub>BrNaO<sub>3</sub>] [M+Na]<sup>+</sup>: 357.0097 found: 357.0096.

### 2.5.6 3-(benzyloxy)-2-bromo-4-isopropoxybenzaldehyde (**Xu13-4**)

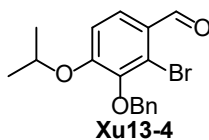

To a solution of 2-bromo-3-hydroxy-4-isopropoxybenzaldehyde (**Xu13-3**) (10 mmol) in DMF (20 mL) was added benzyl bromide (12 mmol, 1.2 equiv.) and K<sub>2</sub>CO<sub>3</sub> (15 mmol, 1.5 equiv.). The resulting solution was stirred at room temperature overnight. The reaction mixture was quenched by the addition of H<sub>2</sub>O and diluted with EtOAc. The organic layer was separated, and the aqueous layer was extracted twice with EtOAc. The combined organic layers were dried over Na<sub>2</sub>SO<sub>4</sub>,

filtered, concentrated. The crude product was then washed by petroleum ether with a little ethyl acetate to afford the product **Xu13-4** as a white solid (2.6 g, 76% yield). Mp: 72.8 – 73.5 °C. <sup>1</sup>H NMR (400 MHz, Chloroform-*d*) δ 10.28 (s, 1H), 7.75 (d, *J* = 8.7 Hz, 1H), 7.58 (d, *J* = 7.0 Hz, 2H), 7.41 (dt, *J* = 12.1, 6.8 Hz, 3H), 6.98 (d, *J* = 8.7 Hz, 1H), 5.06 (s, 2H), 4.75 (p, *J* = 6.1 Hz, 1H), 1.45 (d, *J* = 6.0 Hz, 6H). <sup>13</sup>C NMR (101 MHz, CDCl<sub>3</sub>) δ 191.0, 157.2, 145.8, 136.8, 128.6, 128.4, 128.3, 127.0, 126.4, 123.8, 112.8, 74.7, 71.7, 21.9. HRMS (ESI) calculated for [C<sub>17</sub>H<sub>17</sub>BrNaO<sub>3</sub>] [M+Na]<sup>+</sup>: 371.0253 found: 371.0249.

### 2.5.7 2-(benzyloxy)-3-bromo-4-(dimethoxymethyl)-1-ethoxybenzene (**Xu12-5**)

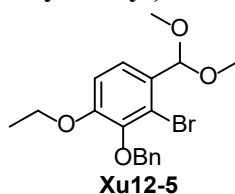

Prepared from 3-(benzyloxy)-2-bromo-4-ethoxybenzaldehyde (**Xu12-4**) (3 mmol) in trimethoxymethane (30 mmol, 10 equiv.) and *p*-toluenesulfonic acid (0.15 mmol, 5% mol). The resulting solution was stirred 5 hours at 60 °C. The reaction mixture was washed by the addition of NaHCO<sub>3</sub> (aq.) and the combined organic layers concentrated. The crude product was purified by flash column chromatography on aluminum oxide (petroleum ether: ethyl acetate = 20: 1) to afford the product **Xu12-5** as a white liquid (1.0 g, 90% yield). <sup>1</sup>H NMR (400 MHz, Chloroform-*d*) δ 7.61 (d, *J* = 7.1 Hz, 1H), 7.49 – 7.31 (m, 2H), 6.93 (d, *J* = 8.6 Hz, 0H), 5.33 (d, *J* = 204.6 Hz, 1H), 4.12 (q, *J* = 7.0 Hz, 1H), 3.41 (s, 3H), 1.48 (t, *J* = 7.0 Hz, 1H). <sup>13</sup>C NMR (101 MHz, CDCl<sub>3</sub>) δ 153.1, 145.2, 137.1, 129.7, 129.6, 128.3, 128.1, 127.9, 123.3, 119.0, 111.7, 102.9, 74.4, 64.4, 53.7, 14.7. HRMS (ESI) calculated for [C<sub>18</sub>H<sub>21</sub>BrNaO<sub>4</sub>] [M+Na]<sup>+</sup>: 403.0515 found: 403.0518.

### 2.5.8 2-(benzyloxy)-3-bromo-4-(dimethoxymethyl)-1-isopropoxybenzene (**Xu13-5**)

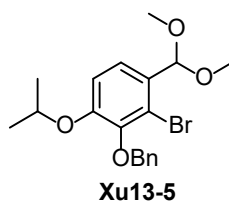

Prepared from 3-(benzyloxy)-2-bromo-4-isopropoxybenzaldehyde (**Xu13-4**) (3 mmol) in trimethoxymethane (30 mmol, 10 equiv.) and *p*-toluenesulfonic acid (0.15 mmol, 5% mol). The resulting solution was stirred 5 hours at 60 °C. The reaction mixture was washed by the addition of

NaHCO<sub>3</sub> (aq.) and the combined organic layers concentrated. The crude product was purified by flash column chromatography on aluminum oxide (petroleum ether: ethyl acetate = 20: 1) to afford the product **Xu13-5** as a white liquid (1.0 g, 90% yield). <sup>1</sup>H NMR (400 MHz, Chloroform-*d*) δ 7.56 (d, *J* = 7.4 Hz, 2H), 7.36 (t, *J* = 7.3 Hz, 2H), 7.31 (d, *J* = 7.9 Hz, 2H), 6.89 (d, *J* = 8.6 Hz, 1H), 5.53 (s, 1H), 5.01 (s, 2H), 4.57 (p, *J* = 6.1 Hz, 1H), 3.36 (s, 6H), 1.33 (d, *J* = 6.1 Hz, 6H). <sup>13</sup>C NMR (101 MHz, CDCl<sub>3</sub>) δ 151.9, 146.1, 137.2, 129.8, 128.4, 128.3, 128.2, 128.1, 127.8, 123.1, 119.2, 113.9, 103.0, 74.3, 71.3, 53.7, 21.9. HRMS (ESI) calculated for [C<sub>19</sub>H<sub>24</sub>O<sub>4</sub>Br] [M+H]<sup>+</sup>: 394.0780 found: 394.0781.

### 2.5.9(2-(benzyloxy)-6-(dimethoxymethyl)-3-ethoxyphenyl)dicyclohexylphosphane (**Xu12-6**)

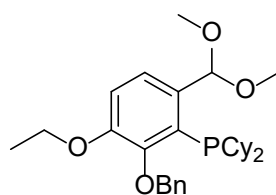

**Xu12-6**

Prepared from (((3-bromo-4-(dimethoxymethyl)-1,2-phenylene)bis(oxy))bis(methylene))dibenzene (**Xu12-5**) (2 mmol) in 4 mL anhydrous THF, was added *n*-BuLi (2.4 mmol, 1.6 M in hexane) dropwise under argon at -78 °C, The resulting solution at this temperature during 1 hour, and dicyclohexylchlorophosphine (2.6 mmol, 1.3 equiv.) was added dropwise. The reaction mixture was warmed to room temperature overnight. The reaction mixture was quenched by the addition of NaHCO<sub>3</sub> (aq.) and diluted with EtOAc. The organic layer was separated, and the aqueous layer was extracted twice with EtOAc. The combined organic layers were concentrated. The crude product was added to next step.

### 2.5.10(2-(benzyloxy)-6-(dimethoxymethyl)-3-isopropoxyphenyl)dicyclohexylphosphane(**Xu13-6**)

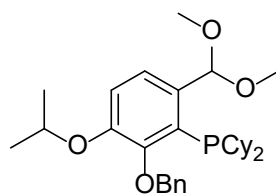

**Xu13-6**

Prepared from 2-(benzyloxy)-3-bromo-4-(dimethoxymethyl)-1-isopropoxybenzene (**Xu13-5**) (2 mmol) in 4 mL anhydrous THF, was added *n*-BuLi (2.4 mmol, 1.6 M in hexane) dropwise under

argon at  $-78\text{ }^{\circ}\text{C}$ , The resulting solution at this temperature during 1 hour, and dicyclohexylchlorophosphine (2.6 mmol, 1.3 equiv.) was added dropwise. The reaction mixture was warmed to room temperature overnight. The reaction mixture was quenched by the addition of  $\text{NaHCO}_3$  (aq.) and diluted with EtOAc. The organic layer was separated, and the aqueous layer was extracted twice with EtOAc. The combined organic layers were concentrated. The crude product was added to next step.

### 2.5.11 3-(benzyloxy)-2-(dicyclohexylphosphaneyl)-4-ethoxybenzaldehyde (Xu12-7)

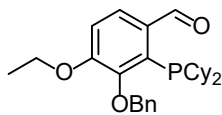

**Xu12-7**

Prepared from (2-(benzyloxy)-6-(dimethoxymethyl)-3-ethoxyphenyl)dicyclohexylphosphane (Xu12-6) in 2 mL THF, was added 1 mL HCl (1.0 M) under argon at  $60\text{ }^{\circ}\text{C}$ . The resulting solution was stirred 5 hours. The reaction mixture was quenched by the addition of  $\text{NaHCO}_3$  (aq.) and diluted with EtOAc. The organic layer was separated, and the aqueous layer was extracted twice with EtOAc. The combined organic layers were dried over  $\text{Na}_2\text{SO}_4$ , filtered, concentrated and purified by flash column chromatography on silica gel (petroleum ether: ethyl acetate = 20: 1) to afford the product **Xu12-7** as a yellow liquid.  $^1\text{H}$  NMR (400 MHz, Chloroform-*d*)  $\delta$  11.07 (d,  $J = 8.8$  Hz, 1H), 7.76 (dd,  $J = 8.6, 3.2$  Hz, 1H), 7.52 (d,  $J = 7.5$  Hz, 2H), 7.42 (t,  $J = 7.5$  Hz, 2H), 7.34 (t,  $J = 7.3$  Hz, 1H), 7.04 (d,  $J = 8.6$  Hz, 1H), 5.24 (s, 2H), 4.13 (q,  $J = 7.0$  Hz, 2H), 2.37 (tdt,  $J = 11.5, 7.5, 3.4$  Hz, 2H), 1.86 – 1.76 (m, 2H), 1.75 – 1.65 (m, 2H), 1.59 (d,  $J = 6.9$  Hz, 4H), 1.40 (t,  $J = 7.0$  Hz, 4H), 1.29 – 1.13 (m, 8H), 0.99 (tdd,  $J = 13.1, 6.0, 2.8$  Hz, 2H), 0.86 (tt,  $J = 9.9, 5.6$  Hz, 1H).  $^{13}\text{C}$  NMR (100 MHz,  $\text{CDCl}_3$ )  $\delta$  193.5, 193.1, 155.3, 150.6, 138.2, 136.4, 136.3, 133.5, 133.1, 128.2, 127.5, 127.2, 124.3, 124.2, 114.0, 73.7, 64.3, 34.5 (d,  $J = 11.6$  Hz), 32.4 (d,  $J = 23.3$  Hz), 30.8 (d,  $J = 9.7$  Hz), 26.8 (d,  $J = 8.8$  Hz), 26.6 (d,  $J = 14.1$  Hz) 26.1, 14.5.  $^{31}\text{P}$  NMR (162 MHz,  $\text{CDCl}_3$ )  $\delta$  -13.99. HRMS (ESI) calculated for  $[\text{C}_{28}\text{H}_{38}\text{O}_3\text{P}]$   $[\text{M}+\text{H}]^+$ : 453.2553 found: 453.2556.

### 2.5.12 3-(benzyloxy)-2-(dicyclohexylphosphaneyl)-4-isopropoxybenzaldehyde (Xu13-7)

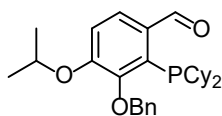

**Xu13-7**

Prepared

from

(2-(benzyloxy)-6-(dimethoxymethyl)-3-isopropoxyphenyl)dicyclohexylphosphane(Xu13-6) in 2 mL THF, was added 1 mL HCl (1.0 M) under argon at 60 °C. The resulting solution was stirred 5 hours. The reaction mixture was quenched by the addition of NaHCO<sub>3</sub> (aq.) and diluted with EtOAc. The organic layer was separated, and the aqueous layer was extracted twice with EtOAc. The combined organic layers were dried over Na<sub>2</sub>SO<sub>4</sub>, filtered, concentrated and purified by flash column chromatography on silica gel (petroleum ether: ethyl acetate = 20: 1) to afford the product **Xu13-7** as a yellow liquid. <sup>1</sup>H NMR (400 MHz, Chloroform-*d*) δ 11.08 (d, *J* = 8.8 Hz, 1H), 7.77 (dt, *J* = 8.7, 2.4 Hz, 1H), 7.53 (d, *J* = 7.6 Hz, 2H), 7.49 – 7.41 (m, 2H), 7.41 – 7.32 (m, 1H), 7.07 (d, *J* = 8.6 Hz, 1H), 5.23 (s, 2H), 4.69 (hept, *J* = 6.3 Hz, 1H), 2.49 – 2.28 (m, 2H), 1.90 – 1.79 (m, 2H), 1.77 – 1.69 (m, 2H), 1.65 – 1.55 (m, 4H), 1.36 (dd, *J* = 6.2, 1.5 Hz, 7H), 1.32 – 1.10 (m, 9H), 1.07 – 0.95 (m, 2H). <sup>13</sup>C NMR (101 MHz, CDCl<sub>3</sub>) δ 193.18 (d, *J* = 42.2 Hz), 154.22, 151.42, 138.23, 136.22 (d, *J* = 15.3 Hz), 133.58 (d, *J* = 37.5 Hz), 128.15, 127.46, 127.07, 124.05 (d, *J* = 6.1 Hz), 115.49, 73.62, 71.08, 34.47 (d, *J* = 11.6 Hz), 32.38 (d, *J* = 23.5 Hz), 30.75 (d, *J* = 10.0 Hz), 26.74 (d, *J* = 9.0 Hz), 26.54 (d, *J* = 13.9 Hz), 26.11, 21.81. <sup>31</sup>P NMR (162 MHz, CDCl<sub>3</sub>) δ -13.95. HRMS (ESI) calculated for [C<sub>29</sub>H<sub>40</sub>O<sub>3</sub>P] [M+H]<sup>+</sup>: 467.2710 found: 467.2715.

### 2.5.13(*R,E*)-*N*-(3-(benzyloxy)-2-(dicyclohexylphosphaneyl)-4-ethoxybenzylidene)-2-methylpropane-2-sulfinamide (**Xu12-8**)

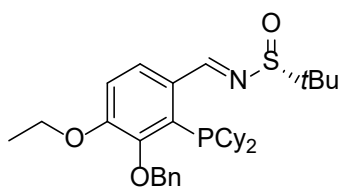

**Xu12-8**

Prepared from 3-(benzyloxy)-2-(dicyclohexylphosphaneyl)-4-ethoxybenzaldehyde (Xu12-7) in 2 mL THF, was added (*R*)-2-methylpropane-2-sulfinamide (1.2 mmol, 1.2 equiv.) and titanium tetrakisopropanolate (2 mmol, 2.0 equiv.) under argon at 50 °C. The resulting solution was stirred 8 hours. The reaction mixture was quenched by the addition of H<sub>2</sub>O (aq.) and diluted with EtOAc. The solution was filtered and the residue was washed twice with EtOAc. The combined organic layers were dried over Na<sub>2</sub>SO<sub>4</sub>, filtered, concentrated and purified by flash column chromatography on silica gel (petroleum ether: ethyl acetate = 10: 1) to afford the crude product **Xu12-8** as a yellow

solid. Mp: 56.6-57.5 °C.  $[\alpha]_D^{20} = -58.9$  ( $c = 0.4$ , Chloroform).  $^1\text{H NMR}$  (400 MHz, Chloroform-*d*)  $\delta$  9.67 (s, 1H), 7.86 (dd,  $J = 8.6, 2.8$  Hz, 1H), 7.55 (d,  $J = 7.5$  Hz, 2H), 7.43 (t,  $J = 7.5$  Hz, 2H), 7.35 (t,  $J = 7.3$  Hz, 1H), 7.04 (d,  $J = 8.6$  Hz, 1H), 5.23 (s, 2H), 4.20 – 4.07 (m, 2H), 2.40 – 2.26 (m, 2H), 1.87 – 1.77 (m, 2H), 1.71 (d,  $J = 7.4$  Hz, 2H), 1.59 (d,  $J = 6.9$  Hz, 4H), 1.42 (t,  $J = 7.0$  Hz, 3H), 1.36 (d,  $J = 3.5$  Hz, 2H), 1.28 (s, 9H), 1.17 (d,  $J = 7.1$  Hz, 7H), 1.08 – 0.93 (m, 2H).  $^{13}\text{C NMR}$  (101 MHz,  $\text{CDCl}_3$ )  $\delta$  164.1, 163.7, 153.9, 151.1, 138.2, 134.2, 133.1, 132.7, 128.2, 127.5, 127.4, 124.2, 114.3, 73.8, 64.2, 57.5, 34.8 (t,  $J = 13.3$  Hz), 32.3 (d,  $J = 23.7$  Hz), 30.6 (dd,  $J = 9.7, 7.4$  Hz), 27.1 – 26.3 (m). 26.2, 22.6, 14.6.  $^{31}\text{P NMR}$  (162 MHz,  $\text{CDCl}_3$ )  $\delta$  -9.32. HRMS (ESI) calculated for  $[\text{C}_{32}\text{H}_{46}\text{NNaO}_3\text{PS}]$   $[\text{M}+\text{Na}]^+$ : 578.2828 found: 578.2829.

**2.5.14(*R,E*)-*N*-(3-(benzyloxy)-2-(dicyclohexylphosphaneyl)-4-isopropoxybenzylidene)-2-methylpropane-2-sulfinamide (Xu13-8)**

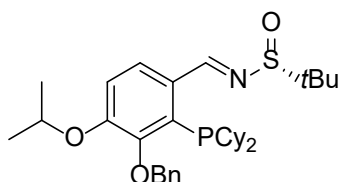

**Xu13-8**

Prepared from 3-(benzyloxy)-2-(dicyclohexylphosphaneyl)-4-isopropoxybenzaldehyde (Xu13-7) in 2 mL THF, was added (*R*)-2-methylpropane-2-sulfinamide (1.2 mmol, 1.2 equiv.) and titanium tetraisopropanolate (2 mmol, 2.0 equiv.) under argon at 50 °C. The resulting solution was stirred 8 hours. The reaction mixture was quenched by the addition of  $\text{H}_2\text{O}$  (aq.) and diluted with EtOAc. The solution was filtered and the residue was washed twice with EtOAc. The combined organic layers were dried over  $\text{Na}_2\text{SO}_4$ , filtered, concentrated and purified by flash column chromatography on silica gel (petroleum ether: ethyl acetate = 10: 1) to afford the crude product **Xu13-8** as a yellow solid. Mp: 73.8-74.5 °C.  $[\alpha]_D^{20} = -79.9$  ( $c = 0.4$ , Chloroform).  $^1\text{H NMR}$  (400 MHz, Chloroform-*d*)  $\delta$  9.64 (s, 1H), 7.82 (dd,  $J = 8.7, 2.8$  Hz, 1H), 7.52 (d,  $J = 7.4$  Hz, 2H), 7.41 (t,  $J = 7.5$  Hz, 2H), 7.37 – 7.29 (m, 1H), 7.02 (d,  $J = 8.6$  Hz, 1H), 5.18 (s, 2H), 4.63 (hept,  $J = 6.1$  Hz, 1H), 2.31 (ddt,  $J = 14.8, 11.2, 8.3$  Hz, 2H), 1.86 – 1.75 (m, 2H), 1.70 (d,  $J = 7.0$  Hz, 2H), 1.57 (d,  $J = 7.1$  Hz, 4H), 1.33 (d,  $J = 6.0$  Hz, 8H), 1.26 (s, 9H), 1.25 – 1.05 (m, 8H), 1.05 – 0.91 (m, 2H).  $^{13}\text{C NMR}$  (101 MHz,  $\text{CDCl}_3$ )  $\delta$  163.83 (d,  $J = 34.9$  Hz), 152.7, 152.0, 138.3, 134.3, 133.1 (d,  $J = 36.1$  Hz), 128.1, 127.4, 127.2, 124.0, 116.1, 73.7, 71.1, 57.4, 35.1 – 34.4 (m), 32.3 (d,  $J = 23.8$  Hz), 30.6 (dd,  $J = 9.8, 7.5$  Hz),

26.8 (d,  $J = 8.6$  Hz), 26.6 (dd,  $J = 13.9, 4.5$  Hz), 26.1, 22.6, 21.9, 21.9.  $^{31}\text{P}$  NMR (162 MHz,  $\text{CDCl}_3$ )  $\delta$  -9.37. HRMS (ESI) calculated for  $[\text{C}_{33}\text{H}_{49}\text{NO}_3\text{PS}]$   $[\text{M}+\text{H}]^+$ : 570.3165 found: 570.3161.

**2.5.15(*R*)-*N*-((*S*)-[1,1'-biphenyl]-4-yl(3-(benzyloxy)-2-(dicyclohexylphosphaneyl)-4-ethoxyphenyl)methyl)-2-methylpropane-2-sulfinamide (Xu12-9)**

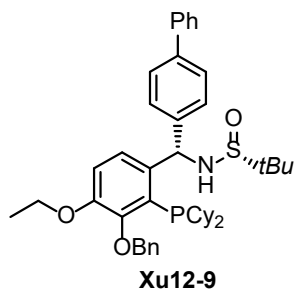

Prepared from  
(*R,E*)-*N*-(3-(benzyloxy)-2-(dicyclohexylphosphaneyl)-4-ethoxybenzylidene)-2-methylpropane-2-sulfinamide (Xu12-8) in 1 mL anhydrous THF, was added [1,1'-biphenyl]-4-ylmagnesium bromide (1 mmol, 2.0 equiv.) dropwise under argon at  $-50$  °C. The reaction mixture was warmed to room temperature overnight and was quenched by the addition of  $\text{NH}_4\text{Cl}$  (aq.) and diluted with EtOAc. The organic layer was separated, and the aqueous layer was extracted twice with EtOAc. The combined organic layers were dried over  $\text{Na}_2\text{SO}_4$ , filtered, concentrated and purified by flash column chromatography on silica gel (petroleum ether: ethyl acetate = 5: 1) to the product **Xu12-9** as a white solid (230 mg, 65% yield). Mp: 81.2-82.1 °C.  $[\alpha]_D^{20} = -87.5$  ( $c = 0.4$ , Chloroform).  $^1\text{H}$  NMR (400 MHz, Chloroform-*d*)  $\delta$  7.61 – 7.49 (m, 8H), 7.43 (p,  $J = 6.3, 5.5$  Hz, 5H), 7.39 – 7.32 (m, 2H), 7.09 (d,  $J = 8.6$  Hz, 1H), 7.02 – 6.90 (m, 1H), 5.37 (d,  $J = 11.8$  Hz, 1H), 5.26 (d,  $J = 11.8$  Hz, 1H), 4.10 (q,  $J = 7.0$  Hz, 3H), 2.38 – 2.22 (m, 2H), 1.81 – 1.58 (m, 6H), 1.52 (d,  $J = 12.3$  Hz, 1H), 1.39 (q,  $J = 6.7$  Hz, 5H), 1.31 (s, 9H), 1.11 (dddd,  $J = 34.0, 23.7, 15.1, 5.0$  Hz, 9H), 0.91 (dq,  $J = 8.8, 3.8$  Hz, 2H).  $^{13}\text{C}$  NMR (101 MHz,  $\text{CDCl}_3$ )  $\delta$  151.0, 149.8, 142.5, 142.0, 141.8, 141.0, 140.0, 138.8, 129.2, 129.1, 128.7, 128.6, 128.4, 128.1, 127.2, 127.1, 127.0, 126.9, 126.9, 123.1, 123.1, 114.9, 73.2, 64.1, 60.1 (d,  $J = 34.3$  Hz), 55.8, 35.3 (d,  $J = 10.8$  Hz), 34.4 (d,  $J = 11.3$  Hz), 33.1 (d,  $J = 25.7$  Hz), 32.3 (d,  $J = 23.1$  Hz), 30.5 (d,  $J = 10.6$  Hz), 30.3 (d,  $J = 8.1$  Hz), 27.1, 27.0, 26.9 (d,  $J = 5.8$  Hz), 26.8 (d,  $J = 6.2$  Hz), 26.7 (d,  $J = 7.4$  Hz), 26.2, 22.7, 14.8.  $^{31}\text{P}$  NMR (162 MHz,  $\text{CDCl}_3$ )  $\delta$  -6.67. HRMS (ESI) calculated for  $[\text{C}_{44}\text{H}_{57}\text{NO}_3\text{PS}]$   $[\text{M}+\text{H}]^+$ : 710.3791 found: 710.3795.

**2.5.16(*R*)-*N*-((*S*)-[1,1'-biphenyl]-4-yl(3-(benzyloxy)-2-(dicyclohexylphosphaneyl)-4-isopropoxyphenyl)methyl)-2-methylpropane-2-sulfinamide (Xu13-9)**

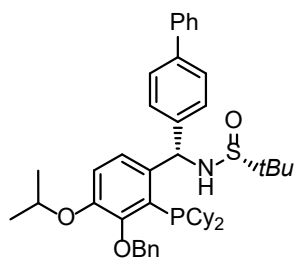

**Xu13-9**

Prepared

from

(*R,E*)-*N*-(3-(benzyloxy)-2-(dicyclohexylphosphaneyl)-4-isopropoxybenzylidene)-2-methylpropane-2-sulfonamide (Xu13-8) in 1 mL anhydrous THF, was added [1,1'-biphenyl]-4-ylmagnesium bromide (1 mmol, 2.0 equiv.) dropwise under argon at -50 °C. The reaction mixture was warmed to room temperature overnight and was quenched by the addition of NH<sub>4</sub>Cl (aq.) and diluted with EtOAc. The organic layer was separated, and the aqueous layer was extracted twice with EtOAc. The combined organic layers were dried over Na<sub>2</sub>SO<sub>4</sub>, filtered, concentrated and purified by flash column chromatography on silica gel (petroleum ether: ethyl acetate = 5: 1) to the product **Xu13-9** as a white solid (198 mg, 55% yield). Mp: 73.8-74.5 °C. [ $\alpha$ ]<sub>D</sub><sup>20</sup> = -72.5 (*c* = 0.4, Chloroform). <sup>1</sup>H NMR (400 MHz, Chloroform-*d*)  $\delta$  7.61 – 7.48 (m, 8H), 7.48 – 7.32 (m, 7H), 7.09 (d, *J* = 8.5 Hz, 1H), 7.02 – 6.85 (m, 1H), 5.35 (d, *J* = 11.8 Hz, 1H), 5.24 (d, *J* = 11.9 Hz, 1H), 4.58 (h, *J* = 6.1 Hz, 1H), 4.06 (s, 1H), 2.29 (p, *J* = 11.6 Hz, 2H), 1.81 – 1.58 (m, 6H), 1.39 (q, *J* = 6.5, 4.6 Hz, 2H), 1.32 (d, *J* = 6.1 Hz, 15H), 1.25 – 0.88 (m, 12H). <sup>13</sup>C NMR (101 MHz, CDCl<sub>3</sub>)  $\delta$  152.2, 148.6, 142.5, 142.2 (d, *J* = 23.7 Hz), 141.0, 140.0, 138.9, 129.2, 129.1, 128.6, 128.1, 127.2, 127.1, 127.0, 126.9, 126.8, 123.1, 123.1, 117.3, 73.2, 71.3, 60.2 (d, *J* = 35.4 Hz), 55.8, 35.3 (d, *J* = 10.6 Hz), 34.5 (d, *J* = 11.3 Hz), 33.1 (d, *J* = 25.9 Hz), 32.3 (d, *J* = 23.0 Hz), 30.5 (d, *J* = 10.3 Hz), 30.4 (d, *J* = 7.9 Hz), 27.1, 27.0 (d, *J* = 2.8 Hz), 27.0, 26.9 (d, *J* = 5.9 Hz), 26.7 (d, *J* = 7.1 Hz), 26.2, 22.7, 22.1, 22.1. <sup>31</sup>P NMR (162 MHz, CDCl<sub>3</sub>)  $\delta$  -6.78. HRMS (ESI) calculated for [C<sub>45</sub>H<sub>59</sub>NO<sub>3</sub>PS] [M+H]<sup>+</sup>: 724.3948 found: 724.3945.

**2.5.17(*R*)-*N*-((*S*)-[1,1'-biphenyl]-4-yl(3-(benzyloxy)-2-(dicyclohexylphosphaneyl)-4-ethoxyphenyl)methyl)-*N*,2-dimethylpropane-2-sulfonamide (Xu12)**



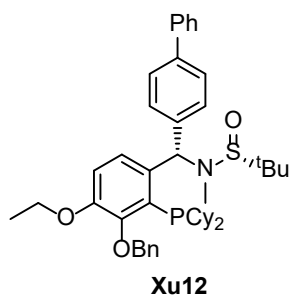

Prepared

from

(*R*)-*N*-((*S*)-[1,1'-biphenyl]-4-yl(3-(benzyloxy)-2-(dicyclohexylphosphaneyl)-4-ethoxyphenyl)methyl)-2-methylpropane-2-sulfonamide (Xu12-9) in 1 mL anhydrous THF, was added *n*-BuLi (0.5 mmol, 1.6 M in hexane) dropwise under argon at -40 °C. The resulting solution at this temperature during 1 hour and iodomethane (0.6 mmol, 2 equiv.) was added. After 1 hour, the reaction mixture moved to 0 °C and stirred 1 hour. The reaction mixture was the addition of NH<sub>4</sub>Cl (aq.) and diluted with EtOAc. The organic layer was separated, and the aqueous layer was extracted twice with EtOAc. The combined organic layers were dried over Na<sub>2</sub>SO<sub>4</sub>, filtered, concentrated and purified by flash column chromatography on silica gel (petroleum ether: ethyl acetate = 5: 1) to the product **Xu12** as a white solid (113 mg, 52% yield). Mp: 80.1-80.9 °C.  $[\alpha]_{\text{D}}^{20} = 13.6$  ( $c = 0.4$ , Chloroform). <sup>1</sup>H NMR (400 MHz, Chloroform-*d*)  $\delta$  7.59 (d,  $J = 7.3$  Hz, 3H), 7.51 (d,  $J = 7.9$  Hz, 4H), 7.43 (q,  $J = 8.0$  Hz, 4H), 7.37 – 7.28 (m, 4H), 7.10 (t,  $J = 10.6$  Hz, 2H), 5.31 (s, 2H), 4.11 (q,  $J = 7.1$  Hz, 2H), 2.69 (s, 3H), 2.48 – 2.35 (m, 1H), 2.18 – 2.07 (m, 1H), 1.76 – 1.64 (m, 4H), 1.57 – 1.51 (m, 1H), 1.48 – 1.42 (m, 2H), 1.39 (d,  $J = 6.9$  Hz, 3H), 1.26 (dt,  $J = 22.5, 8.5$  Hz, 4H), 1.14 (s, 9H), 1.02 – 0.86 (m, 9H). <sup>13</sup>C NMR (101 MHz, CDCl<sub>3</sub>)  $\delta$  151.1, 151.0, 149.7, 140.9, 140.5, 140.2, 139.8, 139.5, 138.8, 131.7, 128.7, 128.6, 128.4, 128.1, 127.2, 127.0, 126.9, 126.9, 126.3, 122.8, 122.8, 114.9, 73.3, 70.5 (d,  $J = 40.0$  Hz), 64.1, 58.6, 35.2 (d,  $J = 10.5$  Hz), 34.1 (d,  $J = 11.6$  Hz), 33.2 (d,  $J = 26.2$  Hz), 32.2 (d,  $J = 22.5$  Hz), 30.9 (d,  $J = 11.6$  Hz), 30.5, 29.9 (d,  $J = 7.9$  Hz), 27.0 (d,  $J = 8.9$  Hz), 26.8 (d,  $J = 10.8$  Hz), 26.6 (d,  $J = 3.0$  Hz), 26.3, 26.1, 24.1, 14.7. <sup>31</sup>P NMR (162 MHz, CDCl<sub>3</sub>)  $\delta$  -6.10. HRMS (ESI) calculated for [C<sub>45</sub>H<sub>59</sub>NO<sub>3</sub>PS] [M+H]<sup>+</sup>: 724.3948 found: 724.3946.

**2.5.8(*R*)-*N*-((*S*)-[1,1'-biphenyl]-4-yl(3-(benzyloxy)-2-(dicyclohexylphosphaneyl)-4-isopropoxyphenyl)methyl)-*N*,2-dimethylpropane-2-sulfonamide(Xu13)**

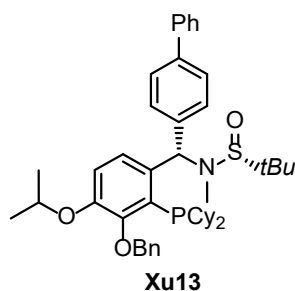

Prepared from (R)-N-((S)-[1,1'-biphenyl]-4-yl(3-(benzyloxy)-2-(dicyclohexylphosphaneyl)-4-isopropoxyphenyl)methyl)-2-methylpropane-2-sulfonamide (Xu13-9) (Xu13-9) in 1 mL anhydrous THF, was added *n*-BuLi (0.5 mmol, 1.6 M in hexane) dropwise under argon at -40 °C. The resulting solution at this temperature during 1 hour and iodomethane (0.6 mmol, 2 equiv.) was added. After 1 hour, the reaction mixture moved to 0 °C and stirred 1 hour. The reaction mixture was the addition of NH<sub>4</sub>Cl (aq.) and diluted with EtOAc. The organic layer was separated, and the aqueous layer was extracted twice with EtOAc. The combined organic layers were dried over Na<sub>2</sub>SO<sub>4</sub>, filtered, concentrated and purified by flash column chromatography on silica gel (petroleum ether: ethyl acetate = 5: 1) to the product **Xu13** as a white solid (118 mg, 60% yield). Mp: 82-82.7 °C.  $[\alpha]_D^{20} = 10.1$  ( $c = 0.4$ , Chloroform). <sup>1</sup>H NMR (400 MHz, Chloroform-*d*) δ 7.58 (d,  $J = 7.3$  Hz, 2H), 7.54 (dd,  $J = 8.6, 4.1$  Hz, 1H), 7.49 (t,  $J = 7.6$  Hz, 4H), 7.45 – 7.40 (m, 3H), 7.39 (s, 1H), 7.34 (t,  $J = 7.3$  Hz, 2H), 7.31 – 7.27 (m, 2H), 7.11 (d,  $J = 8.6$  Hz, 1H), 7.05 (d,  $J = 11.5$  Hz, 1H), 5.26 (s, 2H), 4.57 (p,  $J = 6.0$  Hz, 1H), 2.67 (s, 3H), 2.38 (dtd,  $J = 11.5, 8.5, 3.8$  Hz, 1H), 2.14 – 2.02 (m, 1H), 1.77 – 1.61 (m, 6H), 1.42 – 1.28 (m, 15H), 1.12 (s, 9H), 0.93 (ddt,  $J = 15.8, 10.1, 6.3$  Hz, 5H). <sup>13</sup>C NMR (101 MHz, CDCl<sub>3</sub>) δ 152.4 (d,  $J = 3.7$  Hz), 148.5, 141.0, 140.7 (d,  $J = 23.1$  Hz), 139.8, 139.6, 138.9, 131.8, 128.7, 128.1, 127.2, 127.1, 127.1, 127.0, 126.9, 126.4, 122.9 (d,  $J = 5.8$  Hz), 117.7, 73.3, 71.4, 70.5 (d,  $J = 40.2$  Hz), 58.7, 35.3 (d,  $J = 10.3$  Hz), 34.2 (d,  $J = 11.6$  Hz), 33.2 (d,  $J = 26.2$  Hz), 32.3 (d,  $J = 22.5$  Hz), 31.5 (d,  $J = 7.2$  Hz), 31.0 (d,  $J = 11.6$  Hz), 30.6, 30.2 (d,  $J = 5.8$  Hz), 23.0 (d,  $J = 8.0$  Hz), 29.6 (d,  $J = 21.7$  Hz), 27.0 (t,  $J = 9.1$  Hz), 26.9 – 26.6 (m), 26.3 (d,  $J = 26.3$  Hz), 24.2, 22.1, 22.0. <sup>31</sup>P NMR (162 MHz, Chloroform-*d*) δ -6.25. HRMS (ESI) calculated for [C<sub>46</sub>H<sub>61</sub>NO<sub>3</sub>PS] [M+H]<sup>+</sup>: 738.4104 found: 738.4107.

### 3. General procedure for preparation of substrates

#### 3.1 Synthesis of 1-(3-methylbut-3-en-1-yl)-cyclopentan-1-ol (1c)<sup>2</sup>

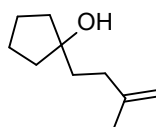

**1c**

To a solution of (3-methylbut-3-en-1-yl)-magnesium bromide (55 mmol, 1.1 equiv.) in dry Et<sub>2</sub>O (30 mL), was added cyclopentanone (50 mmol, 1.0 equiv.) dropwise under argon at -30 °C. The reaction mixture was warmed to room temperature overnight. The reaction mixture was quenched by the addition of HCl (1 M) and diluted with EtOAc. The organic layer was separated and the aqueous layer was extracted twice with EtOAc. The combined organic layers were dried over Na<sub>2</sub>SO<sub>4</sub>, filtered, concentrated and purified by flash column chromatography on silica gel (petroleum ether: ethyl acetate = 20: 1) to the product **1c** as a white liquid (3.5 g, 45% yield). <sup>1</sup>H NMR (400 MHz, Chloroform-*d*) δ 4.69 (s, 2 H), 2.21 – 2.07 (m, 2 H), 1.83 – 1.76 (m, 2 H), 1.75 – 1.72 (m, 4 H), 1.70 (t, *J* = 3.2 Hz, 1 H), 1.67 – 1.53 (m, 6 H). <sup>13</sup>C NMR (100 MHz, Chloroform-*d*) δ 146.5, 109.6, 82.4, 39.6, 39.3, 33.0, 23.7, 22.5. HRMS (ESI) calculated for [C<sub>10</sub>H<sub>18</sub>ONa] [M+Na]<sup>+</sup>: 177.1250 found: 177.1252.

### 3.2 Synthesis of 1-(3-methylbut-3-en-1-yl)-cyclohexan-1-ol (**1d**)<sup>2</sup>

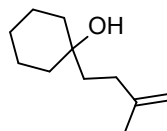

**1d**

To a solution of (3-methylbut-3-en-1-yl)-magnesium bromide (55 mmol, 1.1 equiv.) in dry Et<sub>2</sub>O (30 mL), was added cyclohexanone (50 mmol, 1.0 equiv.) dropwise under argon at -30 °C. The reaction mixture was warmed to room temperature overnight. The reaction mixture was quenched by the addition of HCl (1 M) and diluted with EtOAc. The organic layer was separated and the aqueous layer was extracted twice with EtOAc. The combined organic layers were dried over Na<sub>2</sub>SO<sub>4</sub>, filtered, concentrated and purified by flash column chromatography on silica gel (petroleum ether: ethyl acetate = 20: 1) to the product **1d** as a white liquid (4.0 g, 48% yield). <sup>1</sup>H NMR (400 MHz, Chloroform-*d*) δ 4.69 (s, 2 H), 2.17 – 2.00 (m, 2 H), 1.73 (s, 3 H), 1.61 – 1.46 (m, 8 H), 1.46 – 1.37 (m, 3 H), 1.32 – 1.21 (m, 1 H). <sup>13</sup>C NMR (100 MHz, Chloroform-*d*) δ 146.5,

109.5, 71.3, 40.1, 37.3, 31.1, 25.8, 22.5, 22.1. HRMS (ESI) calculated for  $[C_{11}H_{20}ONa]$   $[M+Na]^+$ : 191.1406 found: 191.1409.

Substrate **9a-9i**<sup>3</sup>, **9j-9n**<sup>4-5</sup>, **9o**, **9p**, **9r**<sup>6</sup>, **9q**<sup>7</sup> were synthesized from reported procedure and the analytical data was consistent with the literature.

## 4. General Procedure and HPLC spectra

### 4.1 General Procedure for reactions of tertiary $\gamma$ -hydroxyalkenes with alkenyl bromides

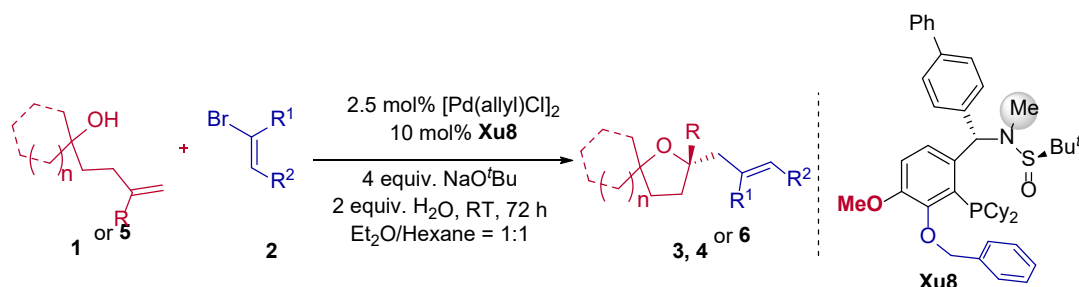

To a sealed tube was added  $[Pd(allyl)Cl]_2$  (2.5 mol%), **Xu8** (10 mol%). The flask was evacuated and refilled with argon. Then tertiary  $\gamma$ -hydroxyalkenes (0.2 mmol), alkenyl halides (0.4 mmol), NaO<sup>t</sup>Bu (4.0 equiv.), H<sub>2</sub>O (2.0 equiv.) and a mixed solution of Et<sub>2</sub>O/Hexane (1: 1, 2 mL) was added to the tube, and stirred at room temperature for 72 hours. After the reaction was complete (monitored by TLC), solvent was removed under reduced pressure. The crude product was then purified by flash column chromatography on silica gel to afford the desired product.

#### 4.1.1 (*S, E*)-2-(3-(4-methoxyphenyl)allyl)-1-oxaspiro[4.5]decane (**3a**)

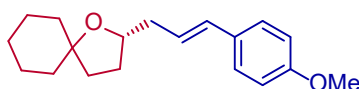

**3a**

Prepared according to typical procedure at RT for 72 hours by using  $[Pd(allyl)Cl]_2$  (2.5 mol%), **Xu8** (10 mol%) from  $\gamma$ -hydroxyalkenes **1b** (0.2 mmol) and alkenyl bromide (0.4 mmol), after flash column chromatography on a silica gel (petroleum ether: ethyl acetate = 40: 1) give the product **3a** as a white liquid (42 mg, 74% yield) with 92% *ee*.  $[\alpha]_D^{20} = -11.1$  ( $c = 0.4$ , Chloroform). <sup>1</sup>H NMR (400 MHz, Chloroform-*d*)  $\delta$  7.34 – 7.26 (m, 2 H), 6.96 – 6.69 (m, 2 H), 6.38 (d,  $J = 15.6$  Hz, 1 H), 6.17 – 5.99 (m, 1 H), 4.16 – 4.01 (m, 1 H), 3.8 0 (s, 3 H), 2.60 – 2.43 (m, 1 H), 2.43 – 2.20 (m, 1 H), 2.04 – 1.91 (m, 1 H), 1.82 – 1.61 (m, 5 H), 1.60 – 1.46 (m, 4 H), 1.45 – 1.31 (m, 4 H). <sup>13</sup>C NMR (100 MHz, Chloroform-*d*)  $\delta$  158.7, 131.1, 130.5, 127.0, 124.7, 113.8, 82.6, 77.5, 55.2, 39.8, 38.5,

37.6, 35.7, 30.6, 25.7, 24.1, 23.8. HRMS (ESI) calculated for  $[C_{19}H_{26}NaO_2]$   $[M+Na]^+$ : 309.1825 found: 309.1828. Enantiomeric excess was determined by HPLC with a Chiralpak OJH column (hexanes: 2-propanol = 99: 1, 0.8 mL/min, 254 nm); major enantiomer  $t_r$  = 15.62 min, minor enantiomer  $t_r$  = 17.61 min.

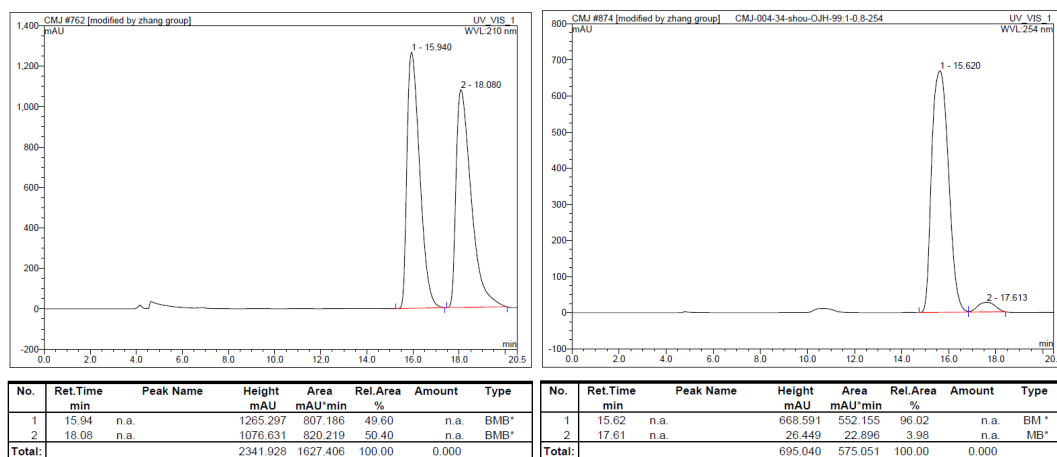

#### 4.1.2 (S)-2-cinnamyl-1-oxaspiro[4.5]decane (**3b**)

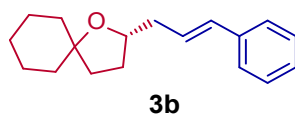

Prepared according to typical procedure at RT for 72 hours by using  $[Pd(allyl)Cl]_2$  (2.5 mol%), **Xu8** (10 mol%) from  $\gamma$ -hydroxyalkenes **1b** (0.2 mmol) and alkenyl bromide (0.4 mmol), after flash column chromatography on a silica gel (petroleum ether: ethyl acetate = 80: 1) give the product **3b** as a white liquid (31 mg, 61% yield) with 91% *ee*.  $[\alpha]_D^{20} = -5.5$  ( $c = 0.4$ , Chloroform).  $^1H$  NMR (500 MHz, Chloroform-*d*)  $\delta$  7.36 (d,  $J = 7.3$  Hz, 2H), 7.30 (t,  $J = 7.7$  Hz, 2H), 7.20 (t,  $J = 7.3$  Hz, 1H), 6.44 (d,  $J = 15.8$  Hz, 1H), 6.28 – 6.21 (m, 1H), 4.11 – 4.06 (m, 1H), 2.55 – 2.48 (m, 1H), 2.41 – 2.35 (m, 1H), 2.05 – 1.95 (m, 1H), 1.80 – 1.63 (m, 5H), 1.60 – 1.47 (m, 4H), 1.41 – 1.35 (m, 4H).  $^{13}C$  NMR (125 MHz, Chloroform-*d*)  $\delta$  137.7, 131.8, 128.4, 126.9, 126.9, 126.0, 82.8, 77.4, 39.9, 38.5, 37.6, 35.7, 30.7, 25.7, 24.1, 23.8. HRMS (ESI) calculated for  $[C_{18}H_{24}NaO]$   $[M+Na]^+$ : 279.1719 found: 279.1710. Enantiomeric excess was determined by HPLC with a Chiralpak OJH column (hexanes: 2-propanol = 99: 1, 0.6 mL/min, 254 nm); major enantiomer  $t_r$  = 10.056 min, minor enantiomer  $t_r$  = 11.487 min.

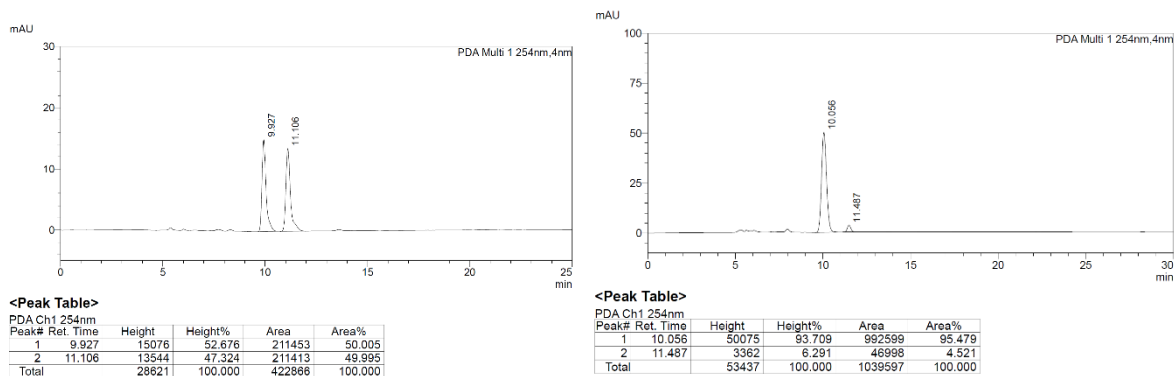

### 4.1.3 (*S, E*)-2-(3-(*p*-tolyl)-allyl)-1-oxaspiro[4.5]decane (**3c**)

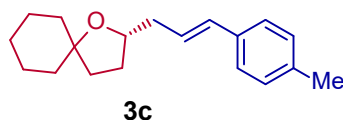

Prepared according to typical procedure at RT for 72 hours by using  $[\text{Pd}(\text{allyl})\text{Cl}]_2$  (2.5 mol%), **Xu8** (10 mol%) from  $\gamma$ -hydroxyalkenes **1b** (0.2 mmol) and alkenyl bromide (0.4 mmol), after flash column chromatography on a silica gel (petroleum ether: ethyl acetate = 80: 1) give the product **3c** as a white liquid (26 mg, 51% yield) with 91% *ee*.  $[\alpha]_D^{20} = -1.3$  ( $c = 0.4$ , Chloroform).  $^1\text{H}$  NMR (500 MHz, Chloroform-*d*)  $\delta$  7.27 (d,  $J = 9.5$  Hz, 2H), 7.12 (d,  $J = 7.5$  Hz, 2H), 6.42 (d,  $J = 16.0$  Hz, 1H), 6.23 – 6.17 (m, 1H), 4.10 – 4.08 (m, 1H), 2.58 – 2.48 (m, 1H), 2.43 – 2.35 (m, 1H), 2.35 (s, 3H), 2.04 – 1.97 (m, 1H), 1.81 – 1.63 (m, 5H), 1.63 – 1.48 (m, 4H), 1.49 – 1.41 (m, 1H), 1.43 – 1.32 (m, 3H).  $^{13}\text{C}$  NMR (125 MHz, Chloroform-*d*)  $\delta$  136.6, 134.9, 131.6, 129.1, 125.9, 125.8, 82.8, 77.5, 39.9, 38.5, 37.6, 35.7, 30.6, 25.7, 24.1, 23.8, 21.1. HRMS (ESI) calculated for  $[\text{C}_{19}\text{H}_{26}\text{NaO}]$   $[\text{M}+\text{Na}]^+$ : 293.1876 found: 293.1866. Enantiomeric excess was determined by HPLC with a Chiralpak OJH+OJ3 column (hexanes: 2-propanol = 99: 1, 0.3 mL/min, 254 nm); major enantiomer  $\text{tr} = 43.03$  min, minor enantiomer  $\text{tr} = 51.09$  min.

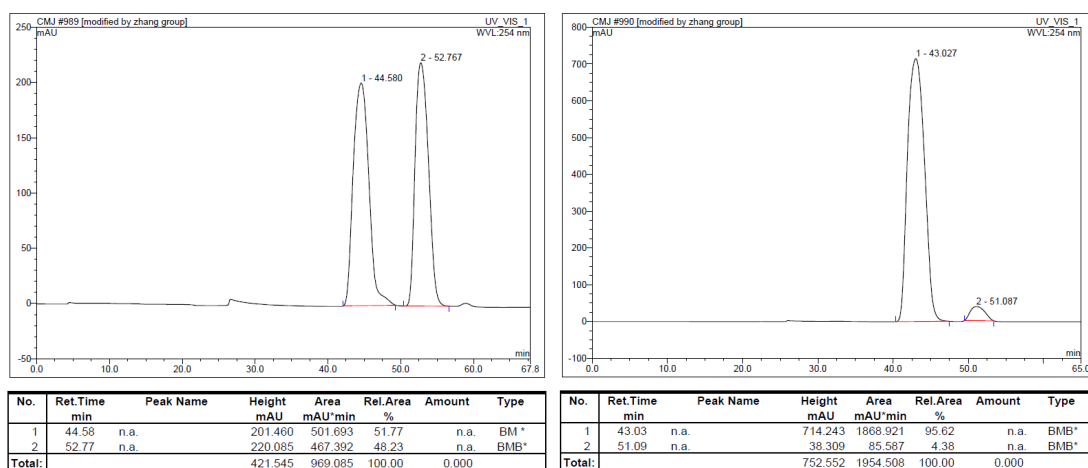

#### 4.1.4 (*S, E*)-2-(3-(*m*-tolyl)-allyl)-1-oxaspiro[4.5]decane (**3d**)

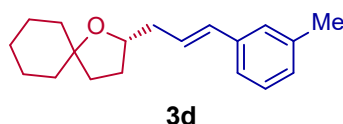

Prepared according to typical procedure at RT for 72 hours by using  $[\text{Pd}(\text{allyl})\text{Cl}]_2$  (2.5 mol%), **Xu8** (10 mol%) from  $\gamma$ -hydroxyalkenes **1b** (0.2 mmol) and alkenyl bromide (0.4 mmol), after flash column chromatography on a silica gel (petroleum ether: ethyl acetate = 80: 1) give the product **3d** as a white liquid (40 mg, 78% yield) with 90% *ee*.  $[\alpha]_{\text{D}}^{20} = -1.2$  ( $c = 0.4$ , Chloroform).  $^1\text{H}$  NMR (500 MHz, Chloroform-*d*)  $\delta$  7.23 – 7.12 (m, 3H), 7.02 (d,  $J = 7.5$  Hz, 1H), 6.41 (d,  $J = 16$  Hz, 1H), 6.28 – 6.18 (m, 1H), 4.12 – 4.03 (m, 1H), 2.57 – 2.48 (m, 1H), 2.42 – 2.34 (m, 1H), 2.34 (s, 3H), 2.04 – 1.95 (m, 1H), 1.80 – 1.61 (m, 5H), 1.62 – 1.46 (m, 4H), 1.48 – 1.31 (m, 4H).  $^{13}\text{C}$  NMR (125 MHz, Chloroform-*d*)  $\delta$  137.9, 137.6, 131.8, 128.3, 127.6, 126.7, 126.6, 123.1, 82.7, 77.4, 39.9, 38.4, 37.6, 35.7, 30.6, 25.7, 24.1, 23.8, 21.3. HRMS (ESI) calculated for  $[\text{C}_{19}\text{H}_{26}\text{NaO}]$   $[\text{M}+\text{Na}]^+$ : 293.1876 found: 293.1873. Enantiomeric excess was determined by HPLC with a Chiralpak OJH+OJ3 column (hexanes: 2-propanol = 99: 1, 0.3 mL/min, 254 nm); major enantiomer  $t_r = 41.63$  min, minor enantiomer  $t_r = 49.69$  min.

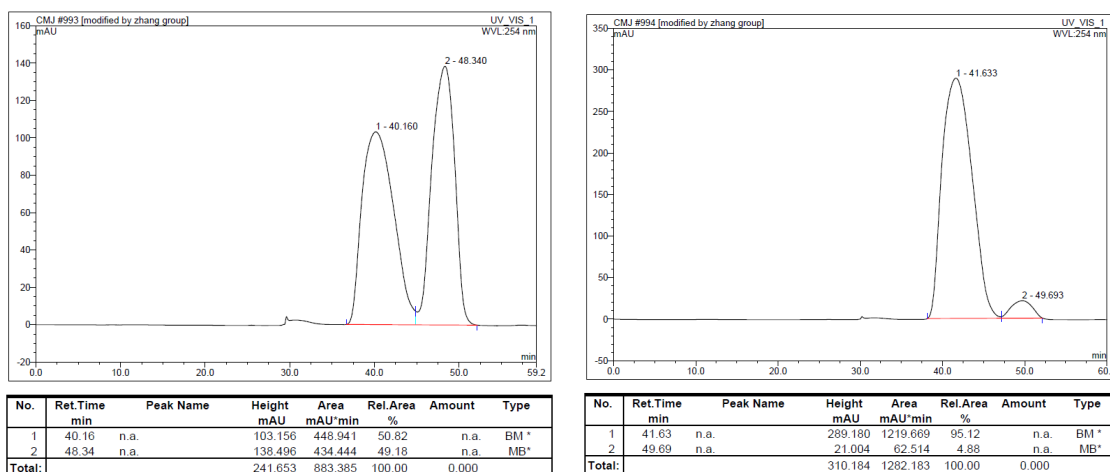

#### 4.1.5 (*S, E*)-2-(3-(2-methoxyphenyl)-allyl)-1-oxaspiro[4.5]decane (**3e**)

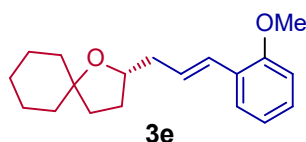

Prepared according to typical procedure at RT for 72 hours by using  $[\text{Pd}(\text{allyl})\text{Cl}]_2$  (2.5 mol%), **Xu8** (10 mol%) from  $\gamma$ -hydroxyalkenes **1b** (0.2 mmol) and alkenyl bromide (0.4 mmol), after flash column chromatography on a silica gel (petroleum ether: ethyl acetate = 50: 1) give the product **3e** as a white liquid (44 mg, 77% yield) with 91% *ee*.  $[\alpha]_D^{20} = -13.1$  ( $c = 0.4$ , Chloroform)  $^1\text{H}$  NMR (400 MHz, Chloroform-*d*)  $\delta$  7.42 (dd,  $J = 7.6, 1.6$  Hz, 1H), 7.21 – 7.16 (m, 1H), 6.90 (t,  $J = 7.6$  Hz, 1H), 6.85 (d,  $J = 8.4$  Hz, 1H), 6.76 (d,  $J = 16.0$  Hz, 1H), 6.26 – 6.18 (m, 1H), 4.11 – 4.05 (m, 1H), 3.84 (s, 3H), 2.58 – 2.52 (m, 1H), 2.43 – 2.36 (m, 1H), 2.05 – 1.95 (m, 1H), 1.77 – 1.63 (m, 5H), 1.60 – 1.47 (m, 4H), 1.45 – 1.31 (m, 4H).  $^{13}\text{C}$  NMR (100 MHz, Chloroform-*d*)  $\delta$  156.3, 127.9, 127.6, 126.8, 126.4, 126.4, 120.6, 110.8, 82.7, 77.6, 55.5, 40.3, 38.5, 37.6, 35.8, 30.7, 25.7, 24.1, 23.8. HRMS (ESI) calculated for  $[\text{C}_{19}\text{H}_{26}\text{NaO}_2]$   $[\text{M}+\text{Na}]^+$ : 309.1825 found: 309.1816. Enantiomeric excess was determined by HPLC with a Chiralpak ODH+OD3 column (hexanes: 2-propanol = 99: 1, 0.5 mL/min, 254 nm); major enantiomer  $t_r = 37.06$  min, minor enantiomer  $t_r = 33.72$  min..



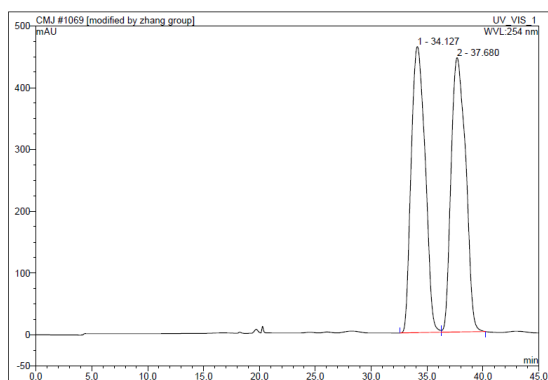

| No.    | Ret.Time min | Peak Name | Height mAU | Area mAU*min | Rel.Area % | Amount | Type |
|--------|--------------|-----------|------------|--------------|------------|--------|------|
| 1      | 34.13        | n.a.      | 462.964    | 669.110      | 50.00      | n.a.   | BM*  |
| 2      | 37.68        | n.a.      | 443.814    | 669.042      | 50.00      | n.a.   | MB*  |
| Total: |              |           | 906.778    | 1338.152     | 100.00     | 0.000  |      |

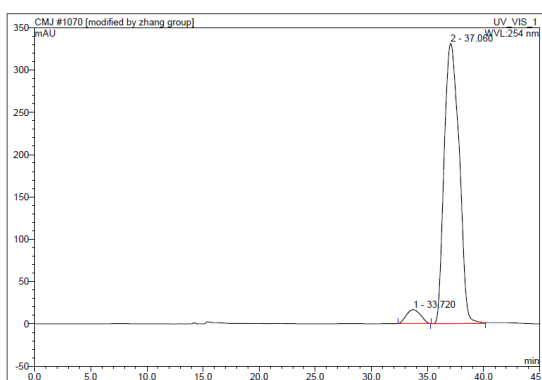

| No.    | Ret.Time min | Peak Name | Height mAU | Area mAU*min | Rel.Area % | Amount | Type |
|--------|--------------|-----------|------------|--------------|------------|--------|------|
| 1      | 33.72        | n.a.      | 16.415     | 24.126       | 4.50       | n.a.   | BMB* |
| 2      | 37.06        | n.a.      | 330.940    | 512.265      | 95.50      | n.a.   | BM*  |
| Total: |              |           | 347.355    | 536.390      | 100.00     | 0.000  |      |

#### 4.1.6 (*S, E*)-2-(3-(3,4-dimethoxyphenyl)-allyl)-1-oxaspiro[4.5]decane (**3f**)

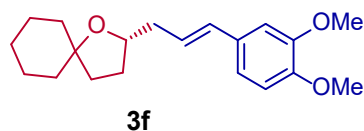

Prepared according to typical procedure at RT for 72 hours by using  $[\text{Pd}(\text{allyl})\text{Cl}]_2$  (2.5 mol%), **Xu8** (10 mol%) from  $\gamma$ -hydroxyalkenes **1b** (0.2 mmol) and alkenyl bromide (0.4 mmol), after flash column chromatography on a silica gel (petroleum ether: ethyl acetate = 20: 1) give the product **3f** as a white liquid (40 mg, 66% yield) with 92% *ee*.  $[\alpha]_{\text{D}}^{20} = -3.2$  ( $c = 0.4$ , Chloroform).  $^1\text{H}$  NMR (500 MHz, Chloroform-*d*)  $\delta$  6.91 (d,  $J = 2.0$  Hz, 1H), 6.87 (dd,  $J = 8.0, 2.0$  Hz, 1H), 6.79 (d,  $J = 8.5$  Hz, 1H), 6.36 (d,  $J = 15.5$  Hz, 1H), 6.12 – 6.06 (m, 1H), 4.09 – 4.03 (m, 1H), 3.89 (s, 3H), 3.86 (s, 3H), 2.52 – 2.47 (m, 1H), 2.38 – 2.32 (m, 1H), 2.02 – 1.94 (m, 1H), 1.77 – 1.70 (m, 2H), 1.69 – 1.62 (m, 3H), 1.59 – 1.46 (m, 4H), 1.44 – 1.29 (m, 4H).  $^{13}\text{C}$  NMR (125 MHz, Chloroform-*d*)  $\delta$  148.9, 148.3, 131.4, 130.9, 125.0, 118.9, 111.1, 108.5, 82.8, 77.5, 55.9, 55.7, 39.8, 38.5, 37.6, 35.7, 30.7, 25.7, 24.1, 23.8. HRMS (ESI) calculated for  $[\text{C}_{20}\text{H}_{28}\text{NaO}_3]$   $[\text{M}+\text{Na}]^+$ : 339.1931 found: 339.1934. Enantiomeric excess was determined by HPLC with a Chiralpak OJH column (hexanes: 2-propanol = 97: 3, 0.8 mL/min, 254 nm); major enantiomer  $t_r = 16.77$  min, minor enantiomer  $t_r = 20.39$  min.

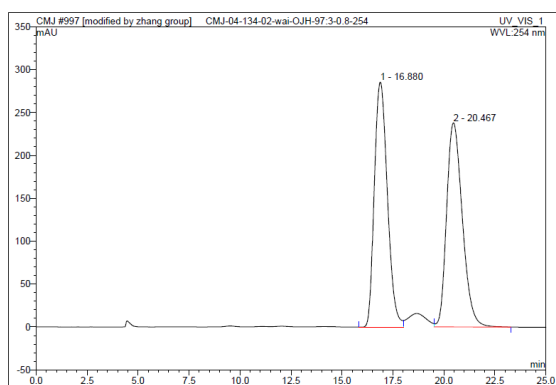

| No.           | RetTime min | Peak Name | Height mAU | Area mAU*min | Rel.Area % | Amount | Type |
|---------------|-------------|-----------|------------|--------------|------------|--------|------|
| 1             | 16.88       | n.a.      | 285.677    | 211.606      | 49.83      | n.a.   | BM*  |
| 2             | 20.47       | n.a.      | 237.953    | 213.029      | 50.17      | n.a.   | MB*  |
| <b>Total:</b> |             |           | 523.629    | 424.635      | 100.00     | 0.000  |      |

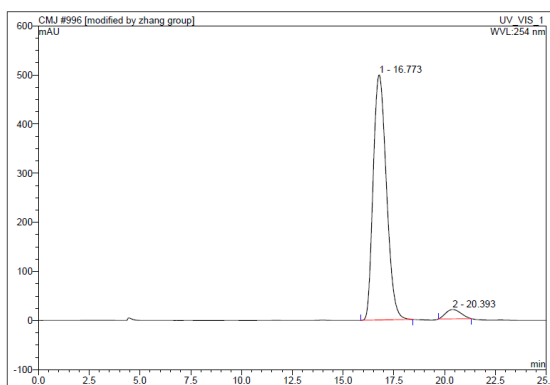

| No.           | RetTime min | Peak Name | Height mAU | Area mAU*min | Rel.Area % | Amount | Type |
|---------------|-------------|-----------|------------|--------------|------------|--------|------|
| 1             | 16.77       | n.a.      | 499.175    | 376.740      | 95.85      | n.a.   | BMB* |
| 2             | 20.39       | n.a.      | 18.929     | 16.332       | 4.15       | n.a.   | BMB* |
| <b>Total:</b> |             |           | 518.104    | 393.071      | 100.00     | 0.000  |      |

#### 4.1.7 (*S, E*)-2-(3-(3,4,5-trimethoxyphenyl)-allyl)-1-oxaspiro[4.5]decane (**3g**)

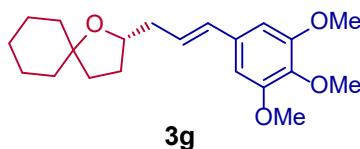

Prepared according to typical procedure at RT for 72 hours by using  $[\text{Pd}(\text{allyl})\text{Cl}]_2$  (2.5 mol%), **Xu8** (10 mol%) from  $\gamma$ -hydroxyalkenes **1b** (0.2 mmol) and alkenyl bromide (0.4 mmol), after flash column chromatography on a silica gel (petroleum ether: ethyl acetate = 10: 1) give the product **3g** as a white liquid (28 mg, 42% yield) with 84% *ee*.  $[\alpha]_{\text{D}}^{20} = -3.5$  ( $c = 0.4$ , Chloroform).  $^1\text{H}$  NMR (500 MHz, Chloroform-*d*)  $\delta$  6.57 (s, 2H), 6.35 (d,  $J = 16.0$  Hz, 1H), 6.17 – 6.11 (m, 1H), 4.10 – 4.05 (m, 1H), 3.86 (s, 6H), 3.83 (s, 3H), 2.52 – 2.46 (m, 1H), 2.39 – 2.33 (m, 1H), 2.02 – 1.96 (m, 1H), 1.77 – 1.71 (m, 2H), 1.69 – 1.64 (m, 3H), 1.60 – 1.45 (m, 4H), 1.44 – 1.29 (m, 4H).  $^{13}\text{C}$  NMR (126 MHz, Chloroform-*d*)  $\delta$  153.2, 137.3, 133.5, 131.6, 126.5, 103.0, 82.9, 77.4, 60.9, 56.0, 39.8, 38.5, 37.6, 35.7, 30.7, 25.7, 24.1, 23.8. HRMS (ESI) calculated for  $[\text{C}_{21}\text{H}_{30}\text{NaO}_4]$   $[\text{M}+\text{Na}]^+$ : 369.2036 found: 369.2031. Enantiomeric excess was determined by HPLC with a Chiralpak ASH+ASH column (hexanes: 2-propanol = 90: 10, 0.3 mL/min, 254 nm); major enantiomer  $t_r = 38.39$  min, minor enantiomer  $t_r = 36.41$  min.

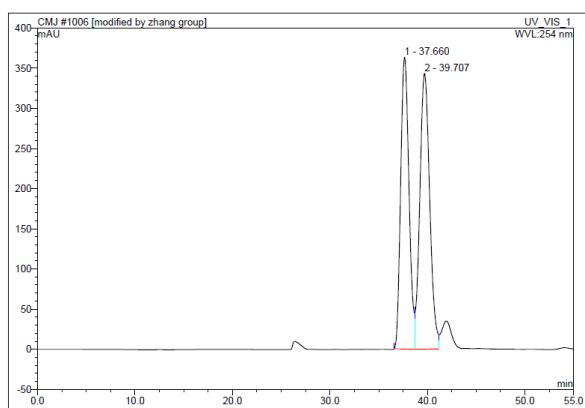

| No.           | Ret.Time<br>min | Peak Name | Height<br>mAU | Area<br>mAU*min | Rel.Area<br>% | Amount | Type |
|---------------|-----------------|-----------|---------------|-----------------|---------------|--------|------|
| 1             | 37.66           | n.a.      | 363.371       | 358.189         | 46.97         | n.a.   | BM*  |
| 2             | 39.71           | n.a.      | 343.531       | 404.409         | 53.03         | n.a.   | M*   |
| <b>Total:</b> |                 |           | 706.902       | 762.598         | 100.00        | 0.000  |      |

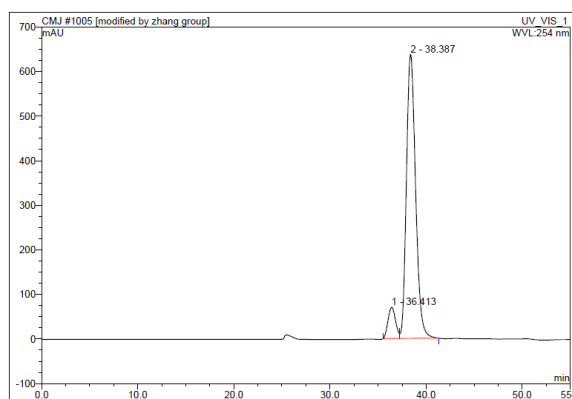

| No.           | Ret.Time<br>min | Peak Name | Height<br>mAU | Area<br>mAU*min | Rel.Area<br>% | Amount | Type |
|---------------|-----------------|-----------|---------------|-----------------|---------------|--------|------|
| 1             | 36.41           | n.a.      | 70.018        | 63.364          | 8.26          | n.a.   | BM*  |
| 2             | 38.39           | n.a.      | 636.766       | 704.101         | 91.74         | n.a.   | MB*  |
| <b>Total:</b> |                 |           | 706.784       | 767.465         | 100.00        | 0.000  |      |

#### 4.1.8 (*S, E*)-2-(3-(4-fluorophenyl)-allyl)-1-oxaspiro[4.5]decane (**3h**)

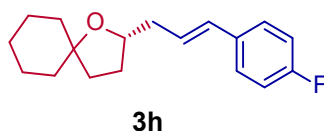

Prepared according to typical procedure at RT for 72 hours by using [Pd(allyl)Cl]<sub>2</sub> (2.5 mol%), **Xu8** (10 mol%) from  $\gamma$ -hydroxyalkenes **1b** (0.2 mmol) and alkenyl bromide (0.4 mmol), after flash column chromatography on a silica gel (petroleum ether: ethyl acetate = 80: 1) give the product **3h** as a white liquid (35 mg, 64% yield) with 90% *ee*.  $[\alpha]_D^{20} = -6.4$  ( $c = 0.4$ , Chloroform). <sup>1</sup>H NMR (500 MHz, Chloroform-*d*)  $\delta$  7.31 – 7.28 (m, 2H), 6.99 – 6.96 (m, 2H), 6.39 (d,  $J = 16.0$  Hz, 1H), 6.18 – 6.12 (m, 1H), 4.10 – 4.04 (m, 1H), 2.52 – 2.46 (m, 1H), 2.40 – 2.33 (m, 1H), 2.01 – 1.95 (m, 1H), 1.77 – 1.61 (m, 5H), 1.58 – 1.52 (m, 4H), 1.46 – 1.30 (m, 4H). <sup>13</sup>C NMR (125 MHz, Chloroform-*d*)  $\delta$  161.9 (d,  $J = 245.7$  Hz), 133.8 (d,  $J = 3.2$  Hz), 130.6, 127.4, 127.4, 126.7 (d,  $J = 2.1$  Hz), 115.3, 115.2, 82.8, 77.4, 39.8, 38.5, 37.6, 35.7, 30.7, 25.7, 24.1, 23.8. <sup>19</sup>F NMR (376 MHz, Chloroform-*d*)  $\delta$  -115.6. HRMS (ESI) calculated for [C<sub>18</sub>H<sub>23</sub>NaFO] [M+Na]<sup>+</sup>: 297.1625 found: 297.1617. Enantiomeric excess was determined by HPLC with a Chiralpak OJH+OJ3 column (hexanes: 2-propanol = 99: 1, 0.5 mL/min, 254 nm); major enantiomer *tr* = 23.13 min, minor enantiomer *tr* = 26.34 min.

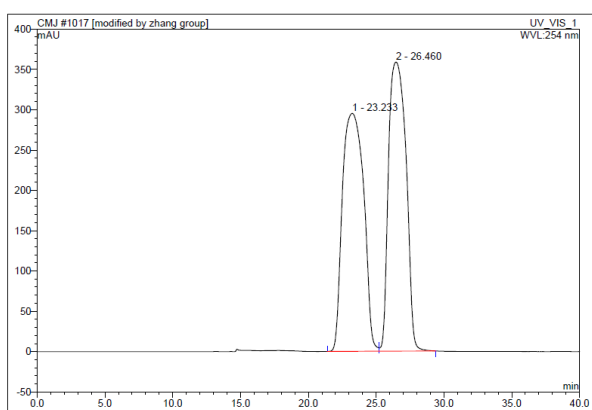

| No.           | Ret.Time min | Peak Name | Height mAU | Area mAU'min | Rel.Area % | Amount | Type |
|---------------|--------------|-----------|------------|--------------|------------|--------|------|
| 1             | 23.23        | n.a.      | 295.112    | 538.078      | 50.01      | n.a.   | BM*  |
| 2             | 26.46        | n.a.      | 358.484    | 537.810      | 49.99      | n.a.   | MB*  |
| <b>Total:</b> |              |           | 653.596    | 1075.888     | 100.00     | 0.000  |      |

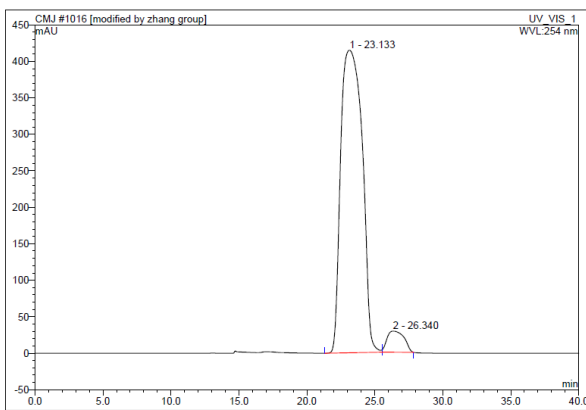

| No.           | Ret.Time min | Peak Name | Height mAU | Area mAU'min | Rel.Area % | Amount | Type |
|---------------|--------------|-----------|------------|--------------|------------|--------|------|
| 1             | 23.13        | n.a.      | 414.757    | 761.724      | 94.75      | n.a.   | BM*  |
| 2             | 26.34        | n.a.      | 28.895     | 42.212       | 5.25       | n.a.   | MB*  |
| <b>Total:</b> |              |           | 443.652    | 803.936      | 100.00     | 0.000  |      |

#### 4.1.9 (*S, E*)-2-(3-(3-fluorophenyl)-allyl)-1-oxaspiro[4.5]decane (**3i**)

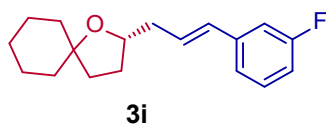

Prepared according to typical procedure at RT for 72 hours by using  $[\text{Pd}(\text{allyl})\text{Cl}]_2$  (2.5 mol%), **Xu8** (10 mol%) from  $\gamma$ -hydroxyalkenes **1b** (0.2 mmol) and alkenyl bromide (0.4 mmol), after flash column chromatography on a silica gel (petroleum ether: ethyl acetate = 80: 1) give the product **3i** as a white liquid (26 mg, 48% yield) with 88% *ee*.  $[\alpha]_D^{20} = -1.5$  ( $c = 0.4$ , Chloroform).  $^1\text{H}$  NMR (400 MHz, Chloroform-*d*)  $\delta$  7.27 – 7.21 (m, 1H), 7.10 (d,  $J = 7.6$  Hz, 1H), 7.06 – 7.03 (m, 1H), 6.91 – 6.86 (m, 1H), 6.40 (d,  $J = 16$  Hz, 1H), 6.29 – 6.21 (m, 1H), 4.11 – 3.03 (m, 1H), 2.54 – 2.47 (m, 1H), 2.42 – 2.35 (m, 1H), 2.04 – 1.94 (m, 1H), 1.80 – 1.59 (m, 5H), 1.62 – 1.44 (m, 4H), 1.46 – 1.29 (m, 4H).  $^{13}\text{C}$  NMR (100 MHz, Chloroform-*d*)  $\delta$  163.1 (d,  $J = 244.7$  Hz), 140.1 (d,  $J = 7.7$  Hz), 130.8 (d,  $J = 2.6$  Hz), 129.8 (d,  $J = 8.5$  Hz), 128.5, 121.9 (d,  $J = 2.6$  Hz), 113.7 (d,  $J = 21.4$  Hz), 112.4 (d,  $J = 21.7$  Hz), 82.9, 77.2, 39.8, 38.5, 37.6, 35.8, 30.7, 25.7, 24.1, 23.8.  $^{19}\text{F}$  NMR (376 MHz, Chloroform-*d*)  $\delta$  -113.9. HRMS (ESI) calculated for  $[\text{C}_{18}\text{H}_{23}\text{NaFO}]$   $[\text{M}+\text{Na}]^+$ : 297.1625 found: 297.1615. Enantiomeric excess was determined by HPLC with a Chiralpak OJH+OJH+OJ3 column (hexanes: 2-propanol = 99: 1, 0.6 mL/min, 254 nm); major enantiomer  $t_r = 8.841$  min, minor enantiomer  $t_r = 9.368$  min.

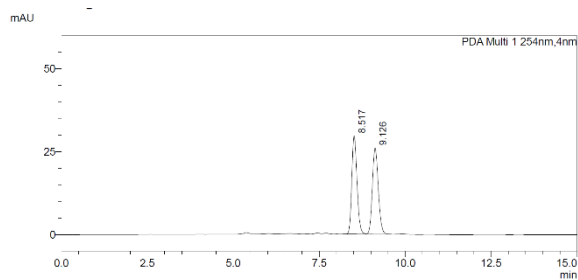

<Peak Table>  
PDA Ch1 254nm

| Peak# | Ret. Time | Height | Height% | Area   | Area%   |
|-------|-----------|--------|---------|--------|---------|
| 1     | 8.517     | 29805  | 53.258  | 312115 | 50.098  |
| 2     | 9.126     | 25984  | 46.742  | 310895 | 49.902  |
| Total |           | 55589  | 100.000 | 623010 | 100.000 |

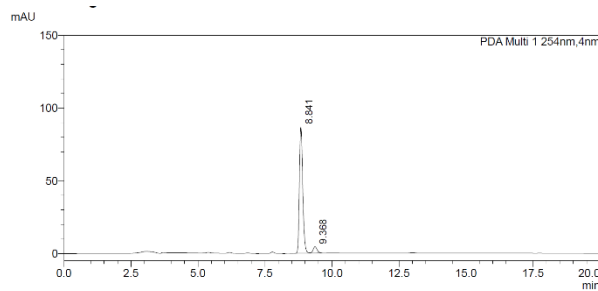

<Peak Table>  
PDA Ch1 254nm

| Peak# | Ret. Time | Height | Height% | Area   | Area%   |
|-------|-----------|--------|---------|--------|---------|
| 1     | 8.841     | 86923  | 95.144  | 747094 | 94.178  |
| 2     | 9.368     | 4436   | 4.856   | 46185  | 5.822   |
| Total |           | 91359  | 100.000 | 793279 | 100.000 |

#### 4.1.10 (*S, E*)-2-(3-(thiophen-2-yl)-allyl)-1-oxaspiro[4.5]decane (**3j**)

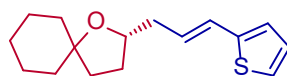

**3j**

Prepared according to typical procedure at RT for 72 hours by using  $[\text{Pd}(\text{allyl})\text{Cl}]_2$  (2.5 mol%), **Xu8** (10 mol%) from  $\gamma$ -hydroxyalkenes **1b** (0.2 mmol) and alkenyl bromide (0.4 mmol), after flash column chromatography on a silica gel (petroleum ether: ethyl acetate = 80: 1) give the product **3j** as a white liquid (21 mg, 41% yield) with 90% *ee*.  $[\alpha]_D^{20} = -1.3$  ( $c = 0.4$ , Chloroform).  $^1\text{H}$  NMR (400 MHz, Chloroform-*d*)  $\delta$  7.09 (d,  $J = 5.2$  Hz, 1H), 6.93 (dd,  $J = 4.8, 3.2$  Hz, 1H), 6.87 (d,  $J = 3.6$  Hz, 1H), 6.56 (d,  $J = 15.6$  Hz, 1H), 6.10 – 6.03 (m, 1H), 4.10 – 4.03 (m, 1H), 2.51 – 2.44 (m, 1H), 2.38 – 2.30 (m, 1H), 2.02 – 1.94 (m, 1H), 1.78 – 1.60 (m, 5H), 1.61 – 1.43 (m, 4H), 1.46 – 1.28 (m, 4H).  $^{13}\text{C}$  NMR (100 MHz, Chloroform-*d*)  $\delta$  142.9, 127.1, 126.9, 125.0, 124.4, 123.2, 82.8, 77.3, 39.7, 38.5, 37.6, 35.8, 30.7, 25.7, 24.1, 23.8. HRMS (ESI) calculated for  $[\text{C}_{16}\text{H}_{22}\text{NaSO}]$   $[\text{M}+\text{Na}]^+$ : 285.1284 found: 285.1279. Enantiomeric excess was determined by HPLC with a Chiralpak OJH column (hexanes: 2-propanol = 99: 1, 0.5 mL/min, 254 nm); major enantiomer  $t_r = 12.91$  min, minor enantiomer  $t_r = 15.65$  min.

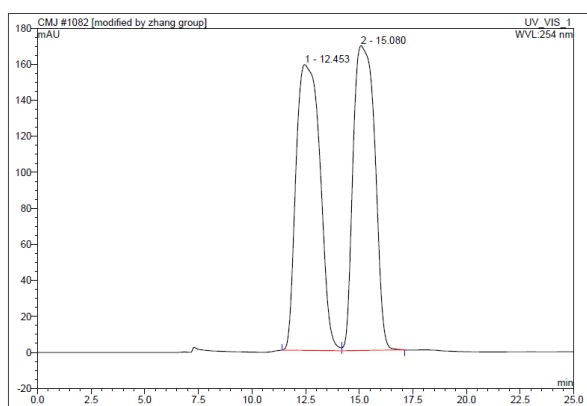

| No.           | Ret. Time min | Peak Name | Height mAU     | Area mAU*min   | Rel. Area %   | Amount       | Type |
|---------------|---------------|-----------|----------------|----------------|---------------|--------------|------|
| 1             | 12.45         | n.a.      | 158.759        | 205.988        | 50.96         | n.a.         | BM*  |
| 2             | 15.08         | n.a.      | 169.302        | 198.194        | 49.04         | n.a.         | MB*  |
| <b>Total:</b> |               |           | <b>328.061</b> | <b>404.181</b> | <b>100.00</b> | <b>0.000</b> |      |

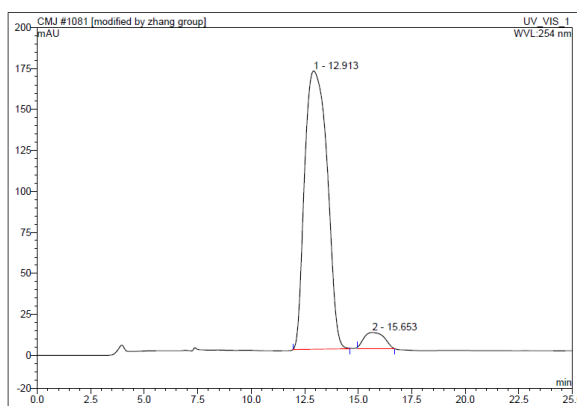

| No.           | Ret. Time min | Peak Name | Height mAU     | Area mAU*min   | Rel. Area %   | Amount       | Type |
|---------------|---------------|-----------|----------------|----------------|---------------|--------------|------|
| 1             | 12.91         | n.a.      | 169.709        | 207.284        | 94.98         | n.a.         | BM*  |
| 2             | 15.65         | n.a.      | 9.869          | 10.965         | 5.02          | n.a.         | MB*  |
| <b>Total:</b> |               |           | <b>179.578</b> | <b>218.249</b> | <b>100.00</b> | <b>0.000</b> |      |

#### 4.1.11 (*S, E*)-2-(3-(naphthalen-1-yl)-allyl)-1-oxaspiro[4.5]decane (**3k**)

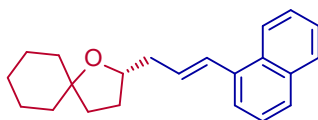

**3k**

Prepared according to typical procedure at RT for 72 hours by using  $[\text{Pd}(\text{allyl})\text{Cl}]_2$  (2.5 mol%), **Xu8** (10 mol%) from  $\gamma$ -hydroxyalkenes **1b** (0.2 mmol) and alkenyl bromide (0.4 mmol), after flash column chromatography on a silica gel (petroleum ether: ethyl acetate = 80: 1) give the product **3k** as a white liquid (40 mg, 65% yield) with 93% *ee*.  $[\alpha]_{\text{D}}^{20} = -8.3$  ( $c = 0.4$ , Chloroform).  $^1\text{H}$  NMR (500 MHz, Chloroform-*d*)  $\delta$  8.15 (d,  $J = 8.0$  Hz, 1H), 7.85 (d,  $J = 7.5$  Hz, 1H), 7.76 (d,  $J = 8.5$  Hz, 1H), 7.58 (d,  $J = 7.0$  Hz, 1H), 7.54 – 7.47 (m, 2H), 7.45 (t,  $J = 7.5$  Hz, 1H), 7.20 (d,  $J = 15.5$  Hz, 1H), 6.30 – 6.24 (m, 1H), 4.19 – 4.14 (m, 1H), 2.70 – 2.64 (m, 1H), 2.55 – 2.49 (m, 1H), 2.08 – 2.01 (m, 1H), 1.82 – 1.68 (m, 5H), 1.66 – 1.50 (m, 4H), 1.49 – 1.34 (m, 4H).  $^{13}\text{C}$  NMR (125 MHz, Chloroform-*d*)  $\delta$  135.5, 133.6, 131.1, 130.2, 129.0, 128.4, 127.3, 125.8, 125.6, 125.6, 123.9, 123.6, 82.8, 77.4, 40.2, 38.5, 37.6, 35.8, 30.7, 25.7, 24.1, 23.8. HRMS (ESI) calculated for  $[\text{C}_{22}\text{H}_{26}\text{NaO}]$   $[\text{M}+\text{Na}]^+$ : 329.1876 found: 329.1875. Enantiomeric excess was determined by HPLC with a Chiralpak OJH column (hexanes: 2-propanol = 99: 1, 0.5 mL/min, 210 nm); major enantiomer *tr* = 19.69 min, minor enantiomer *tr* = 23.88 min.

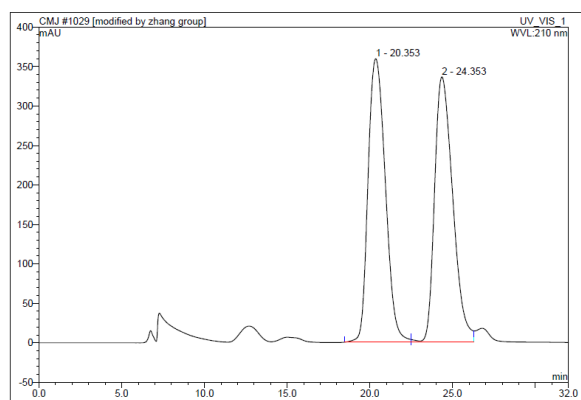

| No.           | Ret.Time min | Peak Name | Height mAU | Area mAU*min | Rel.Area % | Amount | Type |
|---------------|--------------|-----------|------------|--------------|------------|--------|------|
| 1             | 20.35        | n.a.      | 359.090    | 434.804      | 50.33      | n.a.   | BM*  |
| 2             | 24.35        | n.a.      | 336.199    | 429.149      | 49.67      | n.a.   | M*   |
| <b>Total:</b> |              |           | 695.289    | 863.954      | 100.00     | 0.000  |      |

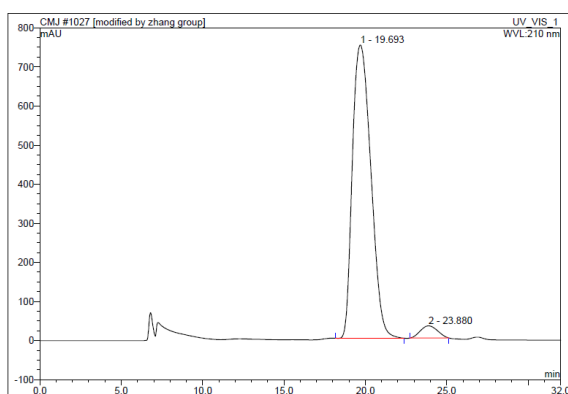

| No.           | Ret.Time min | Peak Name | Height mAU | Area mAU*min | Rel.Area % | Amount | Type |
|---------------|--------------|-----------|------------|--------------|------------|--------|------|
| 1             | 19.69        | n.a.      | 750.029    | 987.366      | 96.30      | n.a.   | BMB* |
| 2             | 23.88        | n.a.      | 31.042     | 37.950       | 3.70       | n.a.   | BMB* |
| <b>Total:</b> |              |           | 781.071    | 1025.316     | 100.00     | 0.000  |      |

#### 4.1.12 (*S, E*)-2-(3-(naphthalen-2-yl)-allyl)-1-oxaspiro[4.5]decane (**31**)

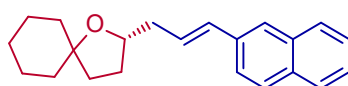

**31**

Prepared according to typical procedure at RT for 72 hours by using  $[\text{Pd}(\text{allyl})\text{Cl}]_2$  (2.5 mol%), **Xu8** (10 mol%) from  $\gamma$ -hydroxyalkenes **1b** (0.2 mmol) and alkenyl bromide (0.4 mmol), after flash column chromatography on a silica gel (petroleum ether: ethyl acetate = 80: 1) give the product **31** as a white liquid (34 mg, 56% yield) with 91% *ee*.  $[\alpha]_{\text{D}}^{20} = -5.4$  ( $c = 0.4$ , Chloroform).  $^1\text{H}$  NMR (500 MHz, Chloroform-*d*)  $\delta$  7.80 – 7.63 (m, 3H), 7.69 (s, 1H), 7.60 (dd,  $J = 8.5, 1.5$  Hz, 1H), 7.47 – 7.40 (m, 2H), 6.61 (d,  $J = 16.0$  Hz, 1H), 6.41 – 6.35 (m, 1H), 4.15 – 4.10 (m, 1H), 2.62 – 2.56 (m, 1H), 2.48 – 2.42 (m, 1H), 2.06 – 1.98 (m, 1H), 1.82 – 1.65 (m, 5H), 1.65 – 1.49 (m, 4H), 1.49 – 1.31 (m, 4H).  $^{13}\text{C}$  NMR (125 MHz, Chloroform-*d*)  $\delta$  135.1, 133.6, 132.7, 131.9, 128.0, 127.8, 127.6, 127.4, 126.1, 125.5, 125.5, 123.5, 82.8, 77.4, 40.0, 38.5, 37.6, 35.7, 30.8, 25.7, 24.2, 23.8. HRMS (ESI) calculated for  $[\text{C}_{22}\text{H}_{26}\text{NaO}]$   $[\text{M}+\text{Na}]^+$ : 329.1876 found: 329.1869. Enantiomeric excess was determined by HPLC with a Chiralpak OJH column (hexanes: 2-propanol = 99: 1, 0.5 mL/min, 210 nm); major enantiomer  $t_r = 33.72$  min, minor enantiomer  $t_r = 39.15$  min.

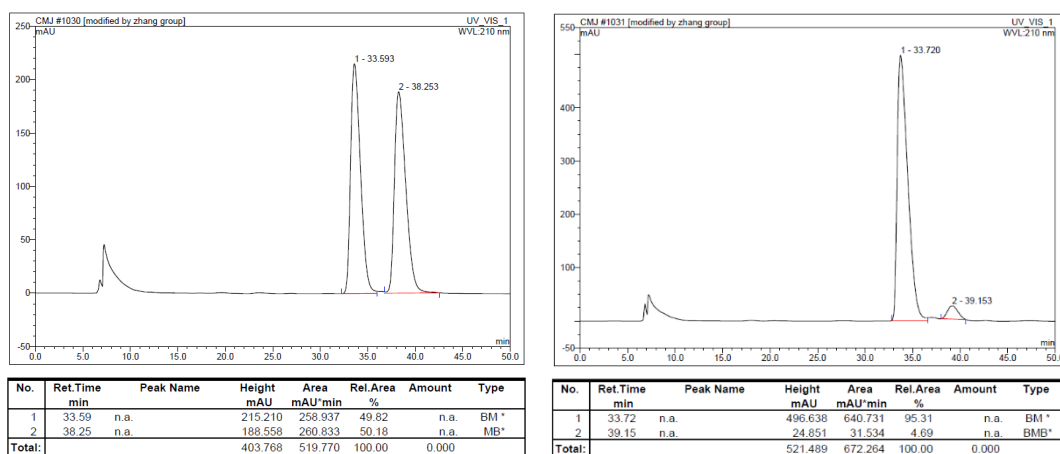

#### 4.1.13 (S)-2-((2E,4E)-5-phenylpenta-2,4-dien-1-yl)-1-oxaspiro[4.5]decane (**3m**)

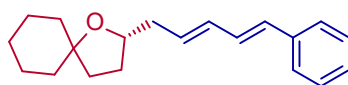

**3m**

Prepared according to typical procedure at RT for 72 hours by using  $[\text{Pd}(\text{allyl})\text{Cl}]_2$  (2.5 mol%), **Xu8** (10 mol%) from  $\gamma$ -hydroxyalkenes **1b** (0.2 mmol) and alkenyl bromide (0.4 mmol), after flash column chromatography on a silica gel (petroleum ether: ethyl acetate = 80: 1) give the product **3m** as a white liquid (47 mg, 83% yield) with 92% *ee*.  $[\alpha]_D^{20} = 10.4$  ( $c = 0.4$ , Chloroform).  $^1\text{H}$  NMR (500 MHz, Chloroform-*d*)  $\delta$  7.38 (d,  $J = 7.3$  Hz, 1 H), 7.33 – 7.27 (m, 2 H), 7.20 (t,  $J = 7.3$  Hz, 1 H), 6.77 (dd,  $J = 15.6, 10.4$  Hz, 1 H), 6.46 (d,  $J = 15.6$  Hz, 1 H), 6.26 (dd,  $J = 15.2, 10.4$  Hz, 1 H), 5.90 – 5.77 (m, 1 H), 4.10 – 3.98 (m, 1 H), 2.54 – 2.41 (m, 1 H), 2.38 – 2.23 (m, 1 H), 2.07 – 1.90 (m, 1 H), 1.77 – 1.65 (m, 4 H), 1.64 – 1.47 (m, 5 H), 1.48 – 1.31 (m, 4 H).  $^{13}\text{C}$  NMR (125 MHz, Chloroform-*d*)  $\delta$  137.5, 132.4, 131.5, 130.4, 129.2, 128.5, 127.1, 126.1, 82.7, 77.3, 39.8, 38.5, 37.5, 35.6, 30.7, 25.6, 24.1, 23.8. HRMS (ESI) calculated for  $[\text{C}_{20}\text{H}_{26}\text{NaO}]$   $[\text{M}+\text{Na}]^+$ : 305.1876 found: 305.1878. Enantiomeric excess was determined by HPLC with a Chiralpak OJH column (hexanes: 2-propanol = 99: 1, 0.5 mL/min, 254 nm); major enantiomer  $t_r = 20.67$  min, minor enantiomer  $t_r = 24.06$  min.



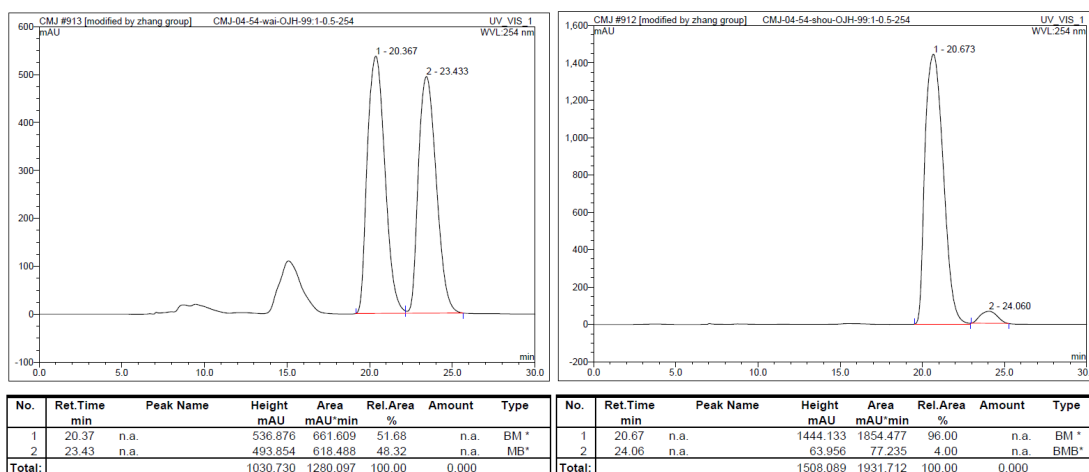

#### 4.1.14 (S)-2-(cyclohex-1-en-1-ylmethyl)-1-oxaspiro[4.5]decane (3n)

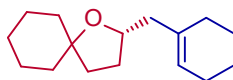

**3n**

Prepared according to typical procedure at RT for 96 hours by using  $[\text{Pd}(\text{allyl})\text{Cl}]_2$  (5 mol%), **Xu8** (20 mol%) from  $\gamma$ -hydroxyalkenes **1b** (0.2 mmol) and alkenyl bromide (0.4 mmol), after flash column chromatography on a silica gel (petroleum ether: ethyl acetate = 80: 1) give the product **3n** as a white liquid (28 mg, 60% yield) with 90% *ee*.  $[\alpha]_D^{20} = -5.8$  ( $c = 0.4$ , Chloroform).  $^1\text{H}$  NMR (500 MHz, Chloroform-*d*)  $\delta$  5.42 (t,  $J = 3.5$  Hz, 1 H), 4.10 – 3.91 (m, 1 H), 2.30 (dd,  $J = 13.4, 5.5$  Hz, 1 H), 2.03 – 1.87 (m, 6 H), 1.74 – 1.61 (m, 4 H), 1.61 – 1.43 (m, 9 H), 1.42 – 1.28 (m, 4 H).  $^{13}\text{C}$  NMR (125 MHz, Chloroform-*d*)  $\delta$  135.2, 122.7, 82.4, 76.7, 45.1, 38.6, 37.6, 35.6, 31.1, 29.0, 25.7, 25.2, 24.1, 23.8, 22.9, 22.4. HRMS (ESI) calculated for  $[\text{C}_{16}\text{H}_{26}\text{NaO}]$   $[\text{M}+\text{Na}]^+$ : 257.1876 found: 257.1878. Enantiomeric excess was determined by HPLC with a Chiralpak OJH+OJH+OJ3 column (hexanes: 2-propanol = 99: 1, 0.5 mL/min, 210 nm); major enantiomer  $t_r = 23.13$  min, minor enantiomer  $t_r = 22.36$  min.

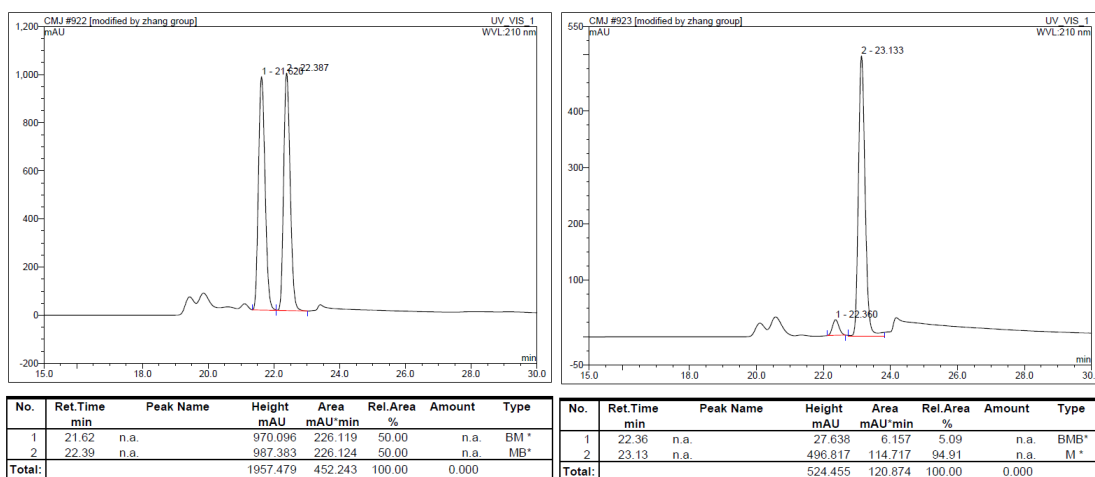

#### 4.1.15 Synthesis of (*S, E*)-2-(3-phenylbut-2-en-1-yl)-1-oxaspiro[4.5]decane (**3o**)

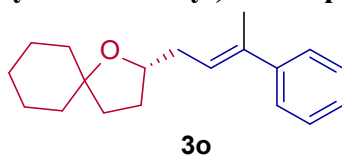

Prepared according to typical procedure at RT for 72 hours by using  $[\text{Pd}(\text{allyl})\text{Cl}]_2$  (2.5 mol%), **Xu8** (10 mol%) from  $\gamma$ -hydroxyalkenes (0.2 mmol) and alkenyl bromide (0.4 mmol), after flash column chromatography on a silica gel (petroleum ether: ethyl acetate = 50: 1) give the product **3o** as a white liquid (34 mg, 63% yield) with 87% *ee*.  $[\alpha]_{\text{D}}^{20} = -2.5$  ( $c = 0.4$ , Chloroform).  $^1\text{H}$  NMR (400 MHz, Chloroform-*d*)  $\delta$  7.41 – 7.34 (m, 2H), 7.33 – 7.27 (m, 2H), 7.24 – 7.18 (m, 1H), 5.80 (tq,  $J = 7.3, 1.4$  Hz, 1H), 4.07 (tt,  $J = 7.5, 5.4$  Hz, 1H), 2.56 (dddd,  $J = 14.5, 7.2, 5.2, 1.0$  Hz, 1H), 2.35 (dtd,  $J = 14.6, 7.4, 1.0$  Hz, 1H), 2.08 – 2.01 (m, 3H), 2.02 – 1.93 (m, 1H), 1.79 – 1.61 (m, 5H), 1.53 (tq,  $J = 6.3, 3.7$  Hz, 4H), 1.45 – 1.28 (m, 4H).  $^{13}\text{C}$  NMR (100 MHz, Chloroform-*d*)  $\delta$  143.9, 136.3, 128.1, 126.6, 125.7, 124.3, 82.7, 77.6, 38.6, 37.7, 35.9, 35.7, 30.9, 25.7, 24.2, 23.9, 16.1. HRMS (ESI) calculated for  $[\text{C}_{19}\text{H}_{26}\text{NaO}] [\text{M}+\text{Na}]^+$ : 293.1876 found: 293.1868. Enantiomeric excess was determined by HPLC with a Chiralpak OJH-OJH column (hexanes: 2-propanol = 99: 1, 0.6 mL/min, 254 nm); major enantiomer *tr* = 16.400 min, minor enantiomer *tr* = 16.989.

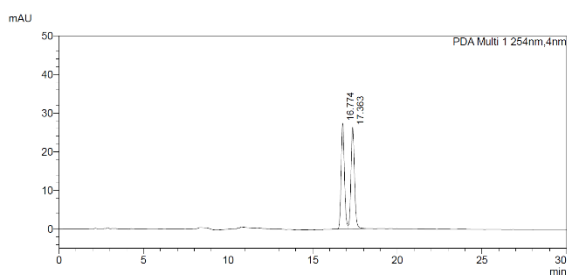

<Peak Table>

| Peak#        | Ret. Time | Height | Height% | Area   | Area%   |
|--------------|-----------|--------|---------|--------|---------|
| 1            | 16.774    | 27340  | 51.036  | 370033 | 49.417  |
| 2            | 17.363    | 26230  | 48.964  | 378770 | 50.583  |
| <b>Total</b> |           | 53570  | 100.000 | 748803 | 100.000 |

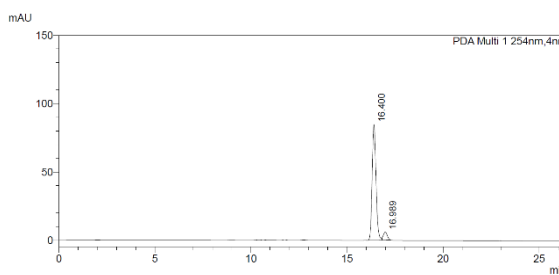

<Peak Table>

| Peak#        | Ret. Time | Height | Height% | Area    | Area%   |
|--------------|-----------|--------|---------|---------|---------|
| 1            | 16.400    | 84703  | 93.596  | 1185985 | 93.439  |
| 2            | 16.989    | 5796   | 6.404   | 83276   | 6.561   |
| <b>Total</b> |           | 90499  | 100.000 | 1269261 | 100.000 |

#### 4.1.16 (*S, E*)-10-(3-(4-methoxyphenyl)-allyl)-1,4,9-trioxadispiro[4.2.48.25]tetradecane (**4a**)

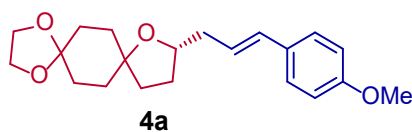

Prepared according to typical procedure at RT for 72 hours by using [Pd(allyl)Cl]<sub>2</sub> (2.5 mol%), **Xu8** (10 mol%) from  $\gamma$ -hydroxyalkenes (0.2 mmol) and alkenyl bromide (0.4 mmol), after flash column chromatography on a silica gel (petroleum ether: ethyl acetate = 10: 1) give the product **4a** as a white liquid (43 mg, 63% yield) with 88% *ee*.  $[\alpha]_D^{20} = -9.6$  ( $c = 0.4$ , Chloroform). <sup>1</sup>H NMR (400 MHz, Chloroform-*d*)  $\delta$  7.29 – 7.25 (m, 2H), 6.85 – 6.81 (m, 2H), 6.37 (d,  $J = 15.6$  Hz, 1H), 6.12 – 6.04 (m, 1H), 4.08 – 4.01 (m, 1H), 3.97 – 3.90 (m, 4H), 3.79 (s, 3H), 2.50 – 2.43 (m, 1H), 2.38 – 2.31 (m, 1H), 2.01 – 1.96 (m, 1H), 1.93 – 1.84 (m, 2H), 1.80 – 1.70 (m, 4H), 1.70 – 1.64 (m, 2H), 1.61 – 1.52 (m, 3H). <sup>13</sup>C NMR (100 MHz, Chloroform-*d*)  $\delta$  158.7, 131.2, 130.5, 127.0, 124.6, 113.9, 108.7, 81.0, 77.9, 64.2, 64.1, 55.2, 39.8, 36.2, 35.5, 34.3, 31.8, 31.8, 30.5. HRMS (ESI) calculated for [C<sub>21</sub>H<sub>28</sub>NaO<sub>4</sub>] [M+Na]<sup>+</sup>: 367.1880 found: 367.1873. Enantiomeric excess was determined by HPLC with a Chiralpak ADH column (hexanes: 2-propanol = 60: 40, 0.5 mL/min, 254 nm); major enantiomer *tr* = 11.45 min, minor enantiomer *tr* = 10.69 min.

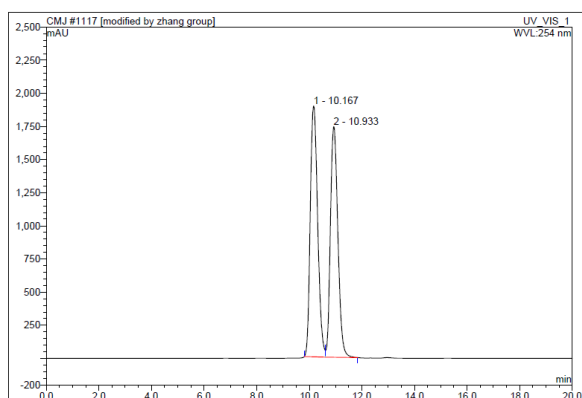

| No.           | Ret.Time<br>min | Peak Name | Height<br>mAU | Area<br>mAU*min | Rel.Area<br>% | Amount | Type |
|---------------|-----------------|-----------|---------------|-----------------|---------------|--------|------|
| 1             | 10.17           | n.a.      | 1892.219      | 615.732         | 51.87         | n.a.   | BM*  |
| 2             | 10.93           | n.a.      | 1739.297      | 571.296         | 48.13         | n.a.   | MB*  |
| <b>Total:</b> |                 |           | 3631.517      | 1187.028        | 100.00        | 0.000  |      |

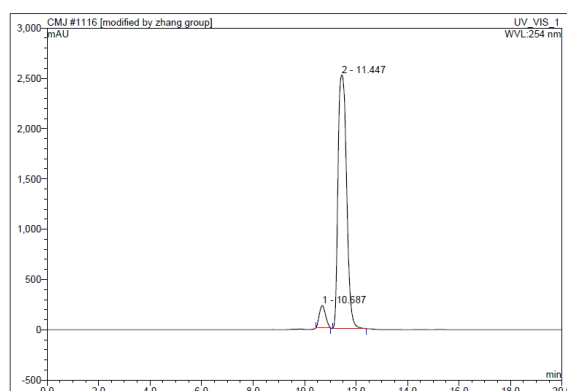

| No.           | Ret.Time<br>min | Peak Name | Height<br>mAU | Area<br>mAU*min | Rel.Area<br>% | Amount | Type |
|---------------|-----------------|-----------|---------------|-----------------|---------------|--------|------|
| 1             | 10.69           | n.a.      | 222.057       | 62.811          | 6.09          | n.a.   | BMB* |
| 2             | 11.45           | n.a.      | 2521.153      | 968.983         | 93.91         | n.a.   | BMB* |
| <b>Total:</b> |                 |           | 2743.210      | 1031.794        | 100.00        | 0.000  |      |

#### 4.1.17 (*S, E*)-8,8-difluoro-2-(3-(4-methoxyphenyl)-allyl)-1-oxaspiro[4.5]decane (**4b**)

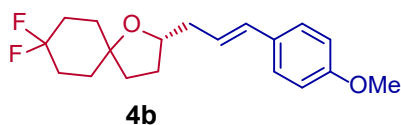

Prepared according to typical procedure at RT for 72 hours by using  $[\text{Pd}(\text{allyl})\text{Cl}]_2$  (2.5 mol%), **Xu8** (10 mol%) from  $\gamma$ -hydroxyalkenes (0.2 mmol) and alkenyl bromide (0.4 mmol), after flash column chromatography on a silica gel (petroleum ether: ethyl acetate = 80: 1) give the product **4b** as a white liquid (38 mg, 60% yield) with 87% *ee*.  $[\alpha]_{\text{D}}^{20} = -5.4$  ( $c = 0.4$ , Chloroform).  $^1\text{H}$  NMR (500 MHz, Chloroform-*d*)  $\delta$  7.29 (d,  $J = 9.0$  Hz, 2H), 6.85 (d,  $J = 9.0$  Hz, 2H), 6.39 (d,  $J = 15.5$  Hz, 1H), 6.10 – 6.04 (m, 1H), 4.09 – 4.04 (m, 1H), 3.80 (s, 3H), 2.50 – 2.45 (m, 1H), 2.39 – 2.33 (m, 1H), 2.23 – 2.05 (m, 2H), 2.04 – 1.99 (m, 1H), 1.96 – 1.86 (m, 2H), 1.82 – 1.59 (m, 7H).  $^{13}\text{C}$  NMR (125 MHz, Chloroform-*d*)  $\delta$  158.8, 131.4, 130.4, 127.1, 124.3, 123.6 (t,  $J = 240.1$  Hz), 113.9, 80.0, 78.2, 55.2, 39.6, 36.4 (d,  $J = 2.1$  Hz), 34.3 (dd,  $J = 7.8, 2.0$  Hz), 33.0 (dd,  $J = 8.0, 2.0$  Hz), 30.9 (d,  $J = 24.5$  Hz), 30.7 (d,  $J = 24.1$  Hz), 30.5.  $^{19}\text{F}$  NMR (376 MHz, Chloroform-*d*)  $\delta$  -93.8 (d,  $J = 235.0$  Hz), -102.5 (d,  $J = 234.9$  Hz). HRMS (ESI) calculated for  $[\text{C}_{19}\text{H}_{24}\text{NaF}_2\text{O}_2]$   $[\text{M}+\text{Na}]^+$ : 345.1637 found: 345.1627. Enantiomeric excess was determined by HPLC with a Chiralpak OJH+OJ3 column (hexanes: 2-propanol = 90: 10, 0.5 mL/min, 254 nm); major enantiomer  $t_r = 50.19$  min, minor enantiomer  $t_r = 45.05$  min.

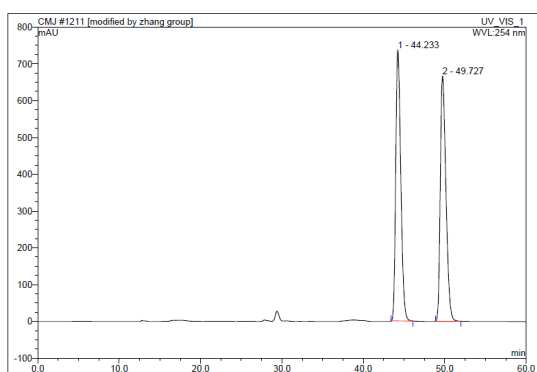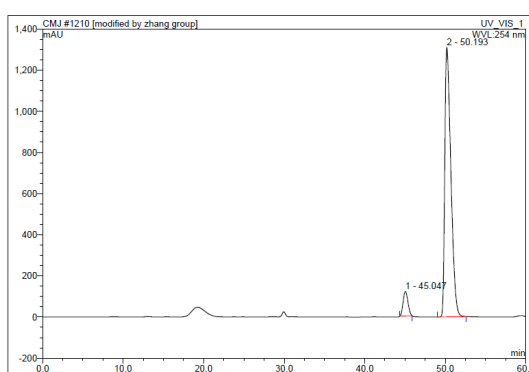

#### 4.1.18 (*S, E*)-2-(3-(4-methoxyphenyl)-allyl)-1,8-dioxaspiro[4.5]decane (**4c**)

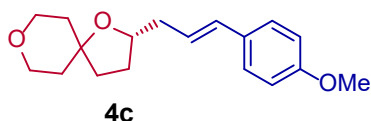

Prepared according to typical procedure at RT for 72 hours by using [Pd(allyl)Cl]<sub>2</sub> (2.5 mol%), **Xu8** (10 mol%) from  $\gamma$ -hydroxyalkenes (0.2 mmol), NaO<sup>t</sup>Bu (0.4 mmol), alkenyl bromide (0.4 mmol) and no additive H<sub>2</sub>O, after flash column chromatography on a silica gel (petroleum ether: ethyl acetate = 10: 1) give the product **4c** as a white liquid (42 mg, 75% yield) with 85% *ee*.  $[\alpha]_D^{20} = -7.8$  ( $c = 0.4$ , Chloroform). <sup>1</sup>H NMR (400 MHz, Chloroform-*d*)  $\delta$  7.27 (d,  $J = 8.8$  Hz, 2H), 6.84 (d,  $J = 8.8$  Hz, 2H), 6.38 (d,  $J = 16.0$  Hz, 1H), 6.11 – 6.03 (m, 1H), 4.11 – 4.04 (m, 1H), 3.87 – 3.81 (m, 2H), 3.79 (s, 3H), 3.66 – 3.59 (m, 2H), 2.53 – 2.46 (m, 1H), 2.39 – 2.32 (m, 1H), 2.06 – 1.98 (m, 1H), 1.85 – 1.76 (m, 1H), 1.75 – 1.69 (m, 2H), 1.68 – 1.59 (m, 4H). <sup>13</sup>C NMR (100 MHz, Chloroform-*d*)  $\delta$  158.8, 131.4, 130.4, 127.1, 124.3, 113.9, 79.4, 77.9, 65.5, 65.4, 55.2, 39.7, 38.7, 37.6, 36.5, 30.3. HRMS (ESI) calculated for [C<sub>18</sub>H<sub>24</sub>NaO<sub>3</sub>] [M+Na]<sup>+</sup>: 311.1618 found: 311.1611. Enantiomeric excess was determined by HPLC with a Chiralpak IC+IC column (hexanes: 2-propanol = 60: 40, 0.5 mL/min, 254 nm); major enantiomer *tr* = 27.05 min, minor enantiomer *tr* = 28.22 min.

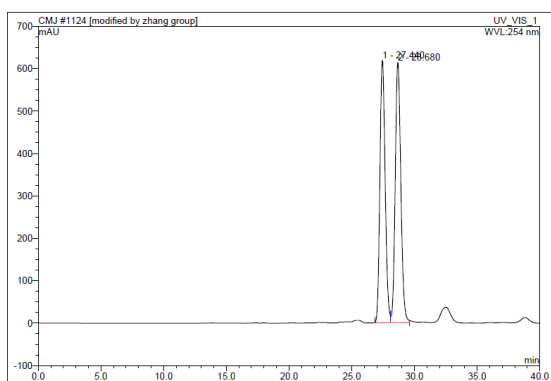

| No.    | Ret.Time<br>min | Peak Name | Height<br>mAU | Area<br>mAU*min | Rel.Area<br>% | Amount | Type |
|--------|-----------------|-----------|---------------|-----------------|---------------|--------|------|
| 1      | 27.44           | n.a.      | 618.687       | 299.629         | 48.57         | n.a.   | BM * |
| 2      | 28.68           | n.a.      | 613.191       | 317.211         | 51.43         | n.a.   | M *  |
| Total: |                 |           | 1231.878      | 616.840         | 100.00        | 0.000  |      |

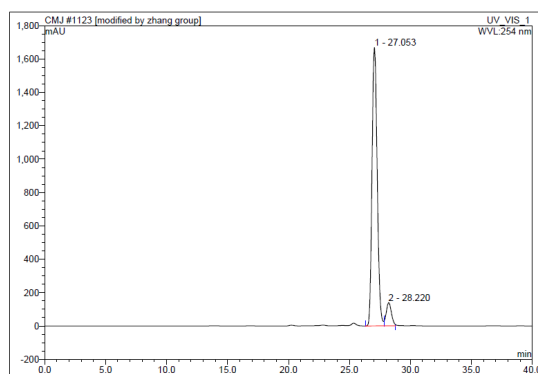

| No.    | Ret.Time<br>min | Peak Name | Height<br>mAU | Area<br>mAU*min | Rel.Area<br>% | Amount | Type |
|--------|-----------------|-----------|---------------|-----------------|---------------|--------|------|
| 1      | 27.05           | n.a.      | 1668.984      | 824.067         | 92.25         | n.a.   | BM * |
| 2      | 28.22           | n.a.      | 138.669       | 69.224          | 7.75          | n.a.   | M *  |
| Total: |                 |           | 1807.654      | 893.291         | 100.00        | 0.000  |      |

#### 4.1.19 (*S, E*)-2-(3-(4-methoxyphenyl)-allyl)-1-oxaspiro[4.6]undecane (**4d**)

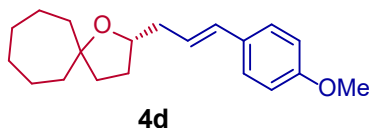

Prepared according to typical procedure at RT for 72 hours by using [Pd(allyl)Cl]<sub>2</sub> (2.5 mol%), **Xu8** (10 mol%) from  $\gamma$ -hydroxyalkenes (0.2 mmol) and alkenyl bromide (0.4 mmol), after flash column chromatography on a silica gel (petroleum ether: ethyl acetate = 80: 1) give the product **4d** as a white liquid (32 mg, 54% yield) with 88% *ee*.  $[\alpha]_D^{20} = -5.5$  ( $c = 0.4$ , Chloroform). <sup>1</sup>H NMR (400

MHz, Chloroform-*d*)  $\delta$  7.27 (d,  $J = 8.8$  Hz, 2H), 6.83 (d,  $J = 8.8$  Hz, 2H), 6.36 (d,  $J = 16$  Hz, 1H), 6.11 – 6.03 (m, 1H), 4.03 – 3.97 (m, 1H), 3.79 (s, 3H), 2.53 – 2.46 (m, 1H), 2.37 – 2.29 (m, 1H), 1.99 – 1.92 (m, 1H), 1.82 – 1.50 (m, 13H), 1.49 – 1.35 (m, 2H).  $^{13}\text{C}$  NMR (100 MHz, Chloroform-*d*)  $\delta$  158.7, 131.1, 130.6, 127.1, 124.7, 113.9, 86.4, 77.7, 55.2, 41.6, 40.6, 39.7, 37.9, 30.5, 29.5, 29.4, 23.2, 22.9. HRMS (ESI) calculated for  $[\text{C}_{20}\text{H}_{28}\text{NaO}_2]$   $[\text{M}+\text{Na}]^+$ : 323.1982 found: 323.1978. Enantiomeric excess was determined by HPLC with a Chiralpak OJH+OJH column (hexanes: 2-propanol = 99: 1, 0.5 mL/min, 254 nm); major enantiomer  $t_r = 46.11$  min, minor enantiomer  $t_r = 48.99$  min.

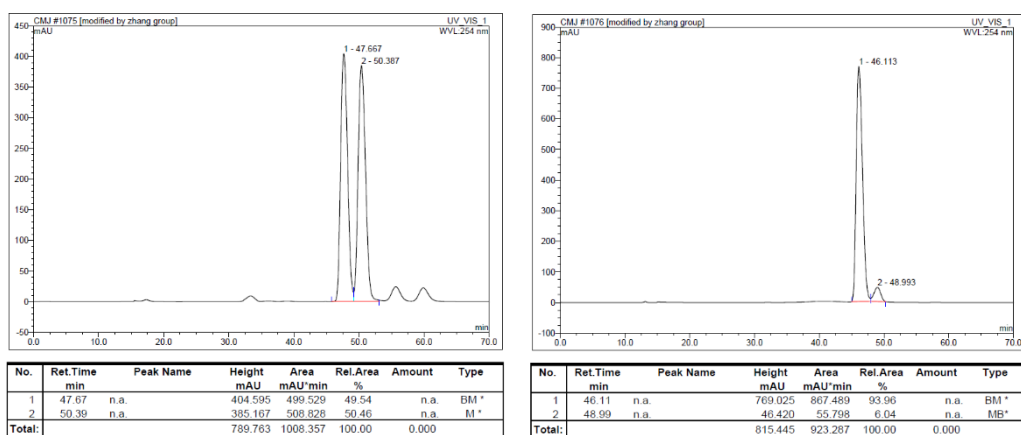

#### 4.1.20 (*S, E*)-2-(3-(4-methoxyphenyl)-allyl)-1-oxaspiro[4.4]nonane (**4e**)

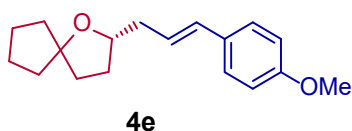

Prepared according to typical procedure at RT for 72 hours by using  $[\text{Pd}(\text{allyl})\text{Cl}]_2$  (2.5 mol%), **Xu8** (10 mol%) from  $\gamma$ -hydroxyalkenes (0.2 mmol) and alkenyl bromide (0.4 mmol), after flash column chromatography on a silica gel (petroleum ether: ethyl acetate = 80: 1) give the product **4e** as a white liquid (43 mg, 79% yield) with 93% *ee*.  $[\alpha]_D^{20} = -11.1$  ( $c = 0.4$ , Chloroform).  $^1\text{H}$  NMR (400 MHz, Chloroform-*d*)  $\delta$  7.27 (d,  $J = 8.8$  Hz, 2H), 6.83 (d,  $J = 8.8$  Hz, 2H), 6.37 (d,  $J = 16.0$  Hz, 1H), 6.10 – 6.03 (m, 1H), 4.06 – 3.99 (m, 1H), 3.78 (s, 3H), 2.52 – 2.46 (m, 1H), 2.37 – 2.30 (m, 1H), 2.03 – 1.95 (m, 1H), 1.89 – 1.73 (m, 6H), 1.56 – 1.64 (m, 1H), 1.63 – 1.45 (m, 4H).  $^{13}\text{C}$  NMR (100 MHz, Chloroform-*d*)  $\delta$  158.7, 131.2, 130.5, 127.1, 124.6, 113.9, 91.2, 77.9, 55.2, 39.9, 39.1, 38.3, 36.5, 31.1, 24.0. HRMS (ESI) calculated for  $[\text{C}_{18}\text{H}_{24}\text{NaO}_2]$   $[\text{M}+\text{Na}]^+$ : 295.1669 found: 295.1668.

Enantiomeric excess was determined by HPLC with a Chiralpak OJH column (hexanes: 2-propanol = 99: 1, 0.5 mL/min, 254 nm); major enantiomer  $t_r$  = 27.22 min, minor enantiomer  $t_r$  = 30.29 min.

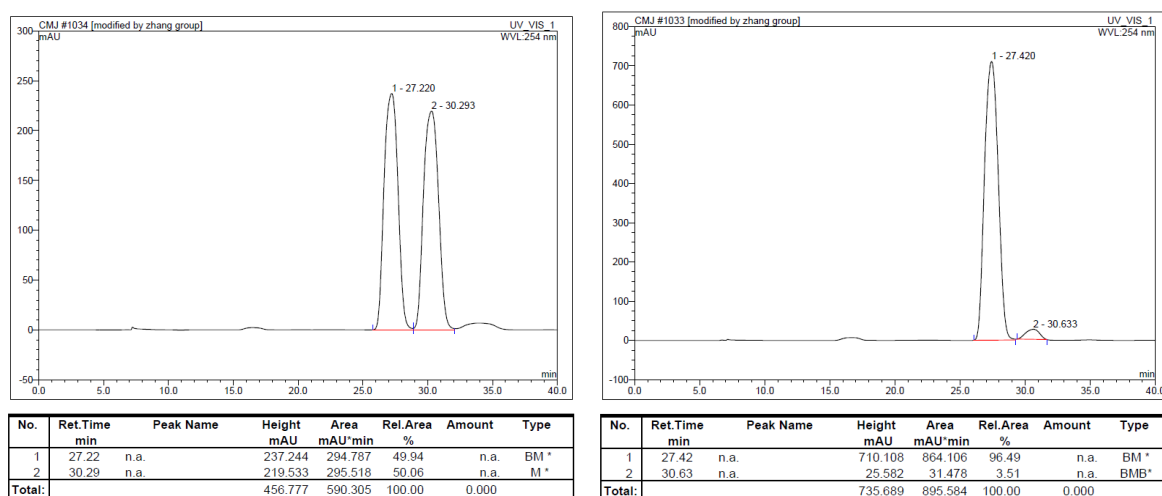

#### 4.1.21 (*S, E*)-5-(3-(4-methoxyphenyl)-allyl)-2,2-dimethyltetrahydrofuran (**4f**)

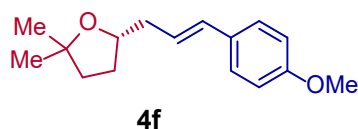

Prepared according to typical procedure at RT for 72 hours by using  $[\text{Pd}(\text{allyl})\text{Cl}]_2$  (2.5 mol%), **Xu8** (10 mol%) from  $\gamma$ -hydroxyalkenes (0.2 mmol),  $\text{NaO}^t\text{Bu}$  (0.4 mmol), alkenyl bromide (0.4 mmol) and no additive  $\text{H}_2\text{O}$ , after flash column chromatography on a silica gel (petroleum ether: ethyl acetate = 80: 1) give the product **4f** as a white liquid (43 mg, 87% yield) with 91% *ee*.  $[\alpha]_D^{20} = -12.7$  ( $c = 0.4$ , Chloroform).  $^1\text{H}$  NMR (400 MHz, Chloroform-*d*)  $\delta$  7.28 (d,  $J = 8.8$  Hz, 2H), 6.83 (d,  $J = 8.8$  Hz, 2H), 6.38 (d,  $J = 16.0$  Hz, 1H), 6.12 – 6.04 (m, 1H), 4.11 – 4.05 (m, 1H), 3.80 (s, 3H), 2.53 – 2.46 (m, 1H), 2.39 – 2.31 (m, 1H), 2.04 – 1.98 (m, 1H), 1.72 – 1.69 (m, 1H), 1.67 – 1.65 (m, 2H), 1.27 (s, 3H), 1.24 (s, 3H).  $^{13}\text{C}$  NMR (100 MHz, Chloroform-*d*)  $\delta$  158.8, 131.3, 130.6, 127.1, 124.5, 113.9, 80.7, 78.2, 55.3, 39.9, 38.5, 31.2, 29.2, 28.1. HRMS (ESI) calculated for  $[\text{C}_{16}\text{H}_{22}\text{NaO}_2]$   $[\text{M}+\text{Na}]^+$ : 269.1512 found: 269.1507. Enantiomeric excess was determined by HPLC with a Chiralpak OJH+OJ3 column (hexanes: 2-propanol = 99: 1, 0.5 mL/min, 254 nm); major enantiomer  $t_r$  = 56.59 min, minor enantiomer  $t_r$  = 60.39 min.

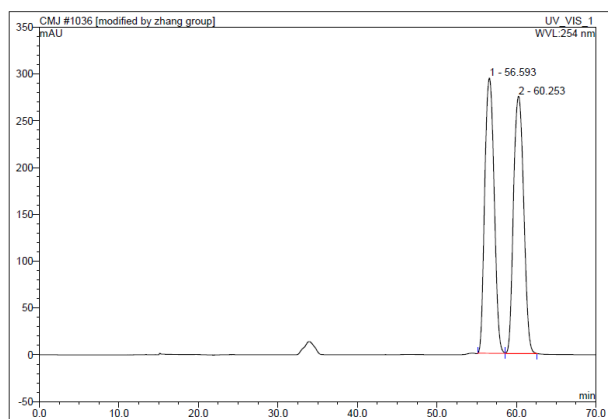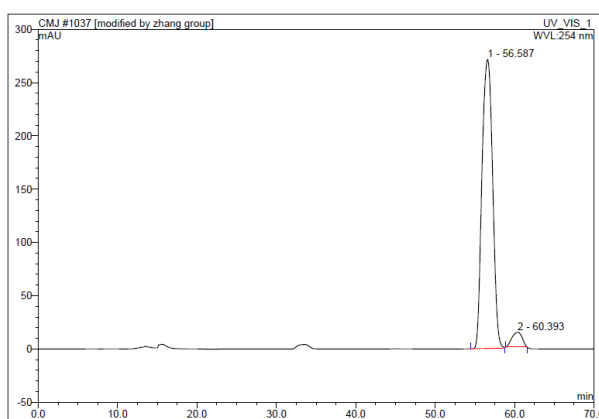

| No.           | Ret.Time<br>min | Peak Name | Height<br>mAU | Area<br>mAU*min | Rel.Area<br>% | Amount | Type |
|---------------|-----------------|-----------|---------------|-----------------|---------------|--------|------|
| 1             | 56.59           | n.a.      | 294.033       | 403.581         | 49.78         | n.a.   | BM * |
| 2             | 60.25           | n.a.      | 274.703       | 407.222         | 50.22         | n.a.   | MB*  |
| <b>Total:</b> |                 |           | 568.736       | 810.803         | 100.00        | 0.000  |      |

| No.           | Ret.Time<br>min | Peak Name | Height<br>mAU | Area<br>mAU*min | Rel.Area<br>% | Amount | Type |
|---------------|-----------------|-----------|---------------|-----------------|---------------|--------|------|
| 1             | 56.59           | n.a.      | 271.243       | 420.597         | 95.29         | n.a.   | BM * |
| 2             | 60.39           | n.a.      | 13.821        | 20.796          | 4.71          | n.a.   | BMB* |
| <b>Total:</b> |                 |           | 285.065       | 441.393         | 100.00        | 0.000  |      |

#### 4.1.22 (*S, E*)-5-(3-(4-fluorophenyl)-allyl)-2,2-dimethyltetrahydrofuran (**4g**)

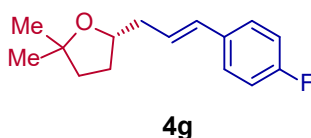

Prepared according to typical procedure at RT for 72 hours by using  $[\text{Pd}(\text{allyl})\text{Cl}]_2$  (2.5 mol%), **Xu8** (10 mol%) from  $\gamma$ -hydroxyalkenes (0.2 mmol), NaO<sup>t</sup>Bu (0.4 mmol), alkenyl bromide (0.4 mmol) and no additive H<sub>2</sub>O, after flash column chromatography on a silica gel (petroleum ether: ethyl acetate = 80: 1) give the product **4g** as a white liquid (20 mg, 43% yield) with 89% *ee*.  $[\alpha]_D^{20} = -8.4$  ( $c = 0.4$ , Chloroform). <sup>1</sup>H NMR (400 MHz, Chloroform-*d*)  $\delta$  7.32 – 7.28 (m, 2H), 6.99 – 6.95 (m, 2H), 6.39 (d,  $J = 16.0$  Hz, 1H), 6.18 – 6.10 (m, 1H), 4.11 – 4.05 (m, 1H), 2.53 – 2.46 (m, 1H), 2.40 – 2.33 (m, 1H), 2.06 – 1.98 (m, 1H), 1.78 – 1.63 (m, 3H), 1.27 (s, 3H), 1.24 (s, 3H). <sup>13</sup>C NMR (100 MHz, Chloroform-*d*)  $\delta$  161.9 (d,  $J = 244.3$  Hz), 133.8 (d,  $J = 3.3$  Hz), 130.7, 127.4 (d,  $J = 7.8$  Hz), 126.5 (d,  $J = 2.3$  Hz), 115.3 (d,  $J = 21.2$  Hz), 80.8, 78.0, 39.8, 38.4, 31.2, 29.2, 28.1. <sup>19</sup>F NMR (376 MHz, Chloroform-*d*)  $\delta$  -115.6. HRMS (ESI) calculated for  $[\text{C}_{15}\text{H}_{19}\text{NaFO}]$   $[\text{M}+\text{Na}]^+$ : 257.1312 found: 257.1303. Enantiomeric excess was determined by HPLC with a Chiralpak ASH column (hexanes: 2-propanol = 99.5: 0.5, 0.6 mL/min, 254 nm); major enantiomer *tr* = 15.387 min, minor enantiomer *tr* = 14.391 min.



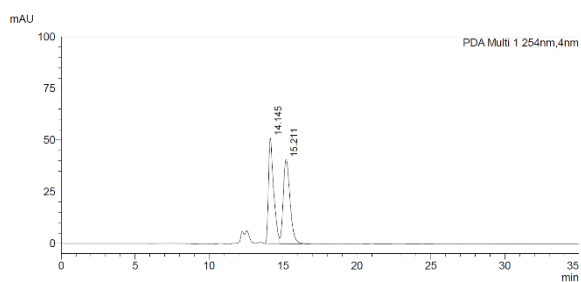

<Peak Table>

| Peak# | Ret. Time | Height | Height% | Area    | Area%   |
|-------|-----------|--------|---------|---------|---------|
| 1     | 14.145    | 51006  | 55.673  | 1240202 | 49.025  |
| 2     | 15.211    | 40611  | 44.327  | 1289554 | 50.975  |
| Total |           | 91617  | 100.000 | 2529756 | 100.000 |

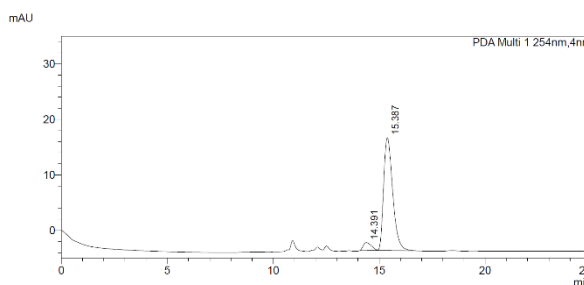

<Peak Table>

| Peak# | Ret. Time | Height | Height% | Area   | Area%   |
|-------|-----------|--------|---------|--------|---------|
| 1     | 14.391    | 1390   | 6.403   | 36183  | 5.642   |
| 2     | 15.387    | 20325  | 93.597  | 605183 | 94.358  |
| Total |           | 21716  | 100.000 | 641367 | 100.000 |

#### 4.1.23 (*S, E*)-5-(3-(2-methoxyphenyl)-allyl)-2,2-dimethyltetrahydrofuran (**4h**)

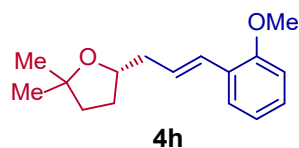

Prepared according to typical procedure at RT for 72 hours by using  $[\text{Pd}(\text{allyl})\text{Cl}]_2$  (2.5 mol%), **Xu8** (10 mol%) from  $\gamma$ -hydroxyalkenes (0.2 mmol),  $\text{NaO}^t\text{Bu}$  (0.4 mmol), alkenyl bromide (0.4 mmol) and no additive  $\text{H}_2\text{O}$ , after flash column chromatography on a silica gel (petroleum ether: ethyl acetate = 80: 1) give the product **4h** as a white liquid (34 mg, 68% yield) with 91% *ee*.  $[\alpha]_{\text{D}}^{20} = -16.3$  ( $c = 0.4$ , Chloroform).  $^1\text{H}$  NMR (400 MHz, Chloroform-*d*)  $\delta$  7.43 (dd,  $J = 7.6, 1.6$  Hz, 1H), 7.21 – 7.17 (m, 1H), 6.91 (t,  $J = 7.6$  Hz, 1H), 6.85 (d,  $J = 8.0$  Hz, 1H), 6.77 (d,  $J = 16.0$  Hz, 1H), 6.26 – 6.18 (m, 1H), 4.14 – 4.07 (m, 1H), 3.84 (s, 3H), 2.59 – 2.52 (m, 1H), 2.44 – 2.37 (m, 1H), 2.05 – 1.99 (m, 1H), 1.77 – 1.69 (m, 3H), 1.28 (s, 3H), 1.25 (s, 3H).  $^{13}\text{C}$  NMR (100 MHz, Chloroform-*d*)  $\delta$  156.3, 127.9, 127.3, 126.7, 126.5, 126.4, 120.6, 110.8, 80.6, 78.2, 55.4, 40.2, 38.4, 31.1, 29.1, 28.1. HRMS (ESI) calculated for  $[\text{C}_{16}\text{H}_{22}\text{NaO}_2]$   $[\text{M}+\text{Na}]^+$ : 269.1512 found: 269.1508. Enantiomeric excess was determined by HPLC with a Chiralpak ODH+OD3 column (hexanes: 2-propanol = 99: 1, 0.5 mL/min, 254 nm); major enantiomer  $t_r = 43.01$  min, minor enantiomer  $t_r = 38.70$  min.

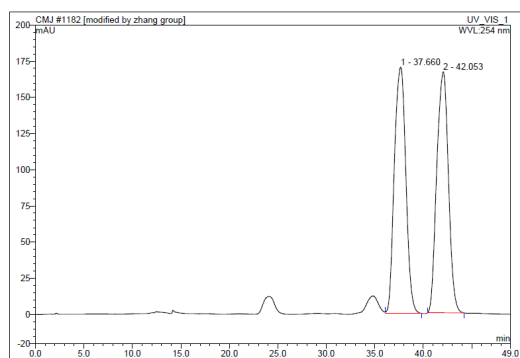

| No.           | RetTime min | Peak Name | Height mAU | Area mAU*min | Rel.Area % | Amount | Type |
|---------------|-------------|-----------|------------|--------------|------------|--------|------|
| 1             | 37.66       | n.a.      | 170.118    | 233.404      | 50.16      | n.a.   | MB*  |
| 2             | 42.05       | n.a.      | 166.414    | 231.920      | 49.84      | n.a.   | BMB* |
| <b>Total:</b> |             |           | 336.532    | 465.323      | 100.00     | 0.000  |      |

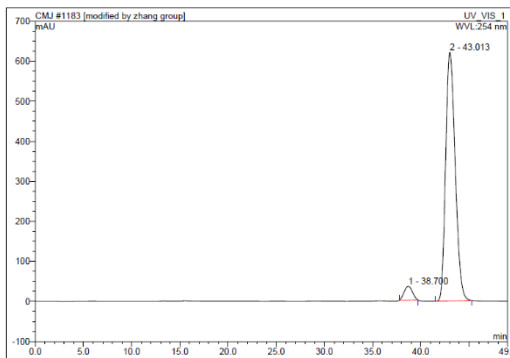

| No.           | RetTime min | Peak Name | Height mAU | Area mAU*min | Rel.Area % | Amount | Type |
|---------------|-------------|-----------|------------|--------------|------------|--------|------|
| 1             | 38.70       | n.a.      | 34.788     | 34.652       | 4.65       | n.a.   | BMB* |
| 2             | 43.01       | n.a.      | 621.030    | 710.111      | 95.35      | n.a.   | BMB* |
| <b>Total:</b> |             |           | 655.819    | 744.763      | 100.00     | 0.000  |      |

#### 4.1.24 (S)-5-cinnamyl-2,2-dimethyltetrahydrofuran (**4i**)

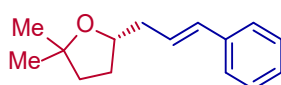

**4i**

Prepared according to typical procedure at RT for 72 hours by using  $[\text{Pd}(\text{allyl})\text{Cl}]_2$  (2.5 mol%), **Xu8** (10 mol%) from  $\gamma$ -hydroxyalkenes (0.2 mmol), NaO<sup>t</sup>Bu (0.4 mmol), alkenyl bromide (0.4 mmol) and no additive H<sub>2</sub>O, after flash column chromatography on a silica gel (petroleum ether: ethyl acetate = 80: 1) give the product **4i** as a white liquid (21 mg, 47% yield) with 90% *ee*.  $[\alpha]_D^{20} = -14.3$  ( $c = 0.4$ , Chloroform). <sup>1</sup>H NMR (400 MHz, Chloroform-*d*)  $\delta$  7.37 – 7.35 (m, 2H), 7.31 – 7.26 (m, 2H), 7.22 – 7.18 (m, 1H), 6.44 (d,  $J = 16.0$  Hz, 1H), 6.27 – 6.20 (m, 1H), 4.13 – 4.07 (m, 1H), 2.56 – 2.49 (m, 1H), 2.42 – 2.35 (m, 1H), 2.06 – 1.98 (m, 1H), 1.77 – 1.73 (m, 2H), 1.72 – 1.68 (m, 1H), 1.28 (s, 3H), 1.25 (s, 3H). <sup>13</sup>C NMR (100 MHz, Chloroform-*d*)  $\delta$  137.7, 131.9, 128.4, 126.9, 126.7, 126.0, 80.7, 78.1, 39.8, 38.4, 31.2, 29.2, 28.1. HRMS (ESI) calculated for  $[\text{C}_{15}\text{H}_{20}\text{NaO}] [\text{M}+\text{Na}]^+$ : 239.1406 found: 239.1398. Enantiomeric excess was determined by HPLC with a Chiralpak ODH+ODH+OD3 column (hexanes: 2-propanol = 99: 1, 0.5 mL/min, 254 nm); major enantiomer  $t_r = 30.51$  min, minor enantiomer  $t_r = 26.75$  min.

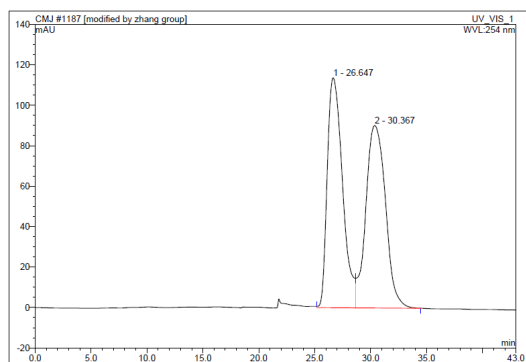

| No.    | Ret.Time min | Peak Name | Height mAU | Area mAU*min | Rel.Area % | Amount | Type |
|--------|--------------|-----------|------------|--------------|------------|--------|------|
| 1      | 26.65        | n.a.      | 113.645    | 179.576      | 49.33      | n.a.   | M*   |
| 2      | 30.37        | n.a.      | 90.180     | 184.443      | 50.67      | n.a.   | MB*  |
| Total: |              |           | 203.825    | 364.019      | 100.00     | 0.000  |      |

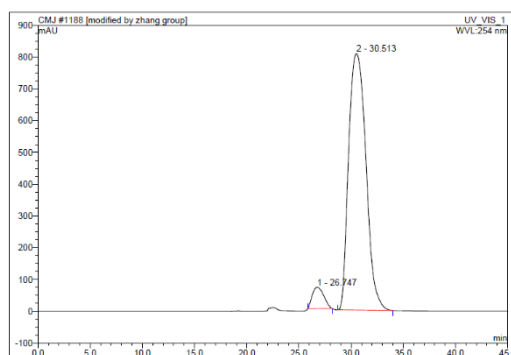

| No.    | Ret.Time min | Peak Name | Height mAU | Area mAU*min | Rel.Area % | Amount | Type |
|--------|--------------|-----------|------------|--------------|------------|--------|------|
| 1      | 26.75        | n.a.      | 67.322     | 86.004       | 5.25       | n.a.   | BMB* |
| 2      | 30.51        | n.a.      | 807.107    | 1551.586     | 94.75      | n.a.   | BMB* |
| Total: |              |           | 874.430    | 1637.590     | 100.00     | 0.000  |      |

#### 4.1.25 (*S, E*)-2,2-dimethyl-5-(3-(naphthalen-1-yl)-allyl)tetrahydrofuran (**4j**)

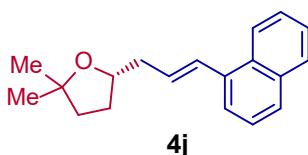

Prepared according to typical procedure at RT for 72 hours by using  $[\text{Pd}(\text{allyl})\text{Cl}]_2$  (2.5 mol%), **Xu8** (10 mol%) from  $\gamma$ -hydroxyalkenes (0.2 mmol),  $\text{NaO}^t\text{Bu}$  (0.4 mmol), alkenyl bromide (0.4 mmol) and no additive  $\text{H}_2\text{O}$ , after flash column chromatography on a silica gel (petroleum ether: ethyl acetate = 80: 1) give the product **4j** as a white liquid (39 mg, 73% yield) with 89% *ee*.  $[\alpha]_D^{20} = -15.7$  ( $c = 0.4$ , Chloroform).  $^1\text{H}$  NMR (400 MHz, Chloroform-*d*)  $\delta$  8.15 (d,  $J = 7.6$  Hz, 1H), 7.87 – 7.84 (m, 1H), 7.77 (d,  $J = 8.0$  Hz, 1H), 7.60 (d,  $J = 7.2$  Hz, 1H), 7.55 – 7.49 (m, 2H), 7.48 – 7.43 (m, 1H), 7.21 (d,  $J = 15.6$  Hz, 1H), 6.35 – 6.20 (m, 1H), 4.27 – 4.12 (m, 1H), 2.74 – 2.62 (m, 1H), 2.60 – 2.47 (m, 1H), 2.15 – 2.05 (m, 1H), 1.86 – 1.74 (m, 4H), 1.33 (s, 4H), 1.29 (s, 4H).  $^{13}\text{C}$  NMR (100 MHz, Chloroform-*d*)  $\delta$  135.4, 133.6, 131.1, 129.9, 129.2, 128.4, 127.3, 125.8, 125.6, 123.9, 123.6, 80.7, 78.0, 40.1, 38.5, 31.2, 29.2, 28.1.  $^{13}\text{C}$  NMR (100 MHz, Chloroform-*d*)  $\delta$  137.7, 131.9, 128.4, 126.9, 126.7, 126.0, 80.7, 78.1, 39.8, 38.4, 31.2, 29.2, 28.1. HRMS (ESI) calculated for  $[\text{C}_{19}\text{H}_{22}\text{NaO}] [\text{M}+\text{Na}]^+$ : 289.1563 found: 289.1559. Enantiomeric excess was determined by HPLC with a Chiralpak ODH+ODH column (hexanes: 2-propanol = 99: 1, 0.8 mL/min, 210 nm); major enantiomer  $t_r = 20.29$  min, minor enantiomer  $t_r = 23.36$  min.

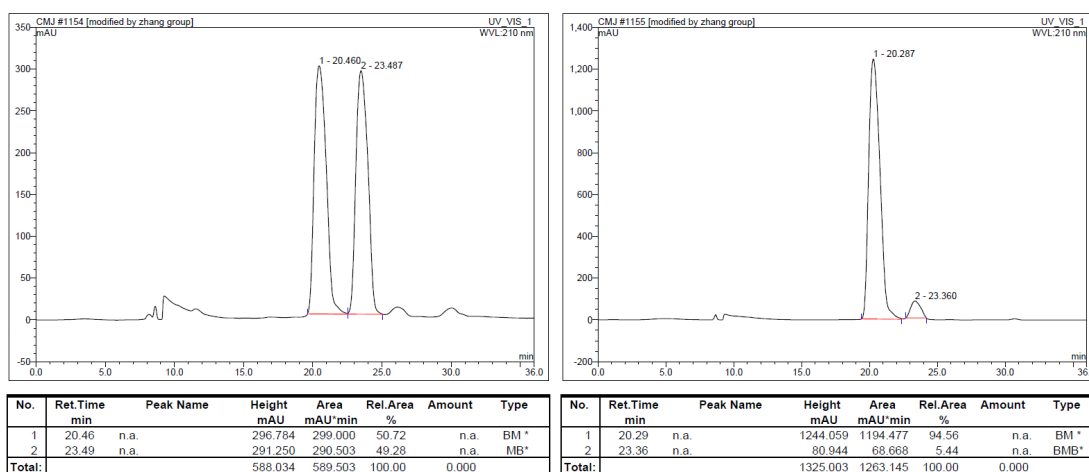

#### 4.1.26 (*S, E*)-2,2-dimethyl-5-(3-(naphthalen-2-yl)-allyl)tetrahydrofuran (**4k**)

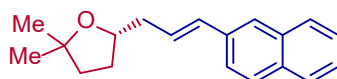

**4k**

Prepared according to typical procedure at RT for 72 hours by using  $[\text{Pd}(\text{allyl})\text{Cl}]_2$  (2.5 mol%), **Xu8** (10 mol%) from  $\gamma$ -hydroxyalkenes (0.2 mmol), NaO<sup>t</sup>Bu (0.4 mmol), alkenyl bromide (0.4 mmol) and no additive H<sub>2</sub>O, after flash column chromatography on a silica gel (petroleum ether: ethyl acetate = 80: 1) give the product **4k** as a white liquid (38 mg, 71% yield) with 87% *ee*.  $[\alpha]_D^{20} = -13.7$  ( $c = 0.4$ , Chloroform). <sup>1</sup>H NMR (400 MHz, Chloroform-*d*)  $\delta$  7.781 – 7.768 (m, 3H), 7.71 (s, 1H), 7.61 (d,  $J = 8.4$  Hz, 1H), 7.48 – 7.41 (m, 2H), 6.63 (d,  $J = 15.6$  Hz, 1H), 6.43 – 6.36 (m, 1H), 4.19 – 4.13 (m, 1H), 2.64 – 2.57 (m, 1H), 2.50 – 2.43 (m, 1H), 2.13 – 2.03 (m, 1H), 1.80 – 1.72 (m, 3H), 1.32 (s, 3H), 1.29 (s, 3H). <sup>13</sup>C NMR (100 MHz, Chloroform-*d*)  $\delta$  135.1, 133.6, 132.7, 132.0, 128.0, 127.8, 127.6, 127.2, 126.1, 125.5, 125.5, 123.6, 80.7, 78.1, 40.0, 38.4, 31.2, 29.2, 28.1. HRMS (ESI) calculated for  $[\text{C}_{19}\text{H}_{22}\text{NaO}]$   $[\text{M}+\text{Na}]^+$ : 289.1563 found: 289.1556. Enantiomeric excess was determined by HPLC with a Chiralpak OJH column (hexanes: 2-propanol = 99: 1, 0.5 mL/min, 254 nm); major enantiomer  $t_r = 35.54$  min, minor enantiomer  $t_r = 40.26$  min.

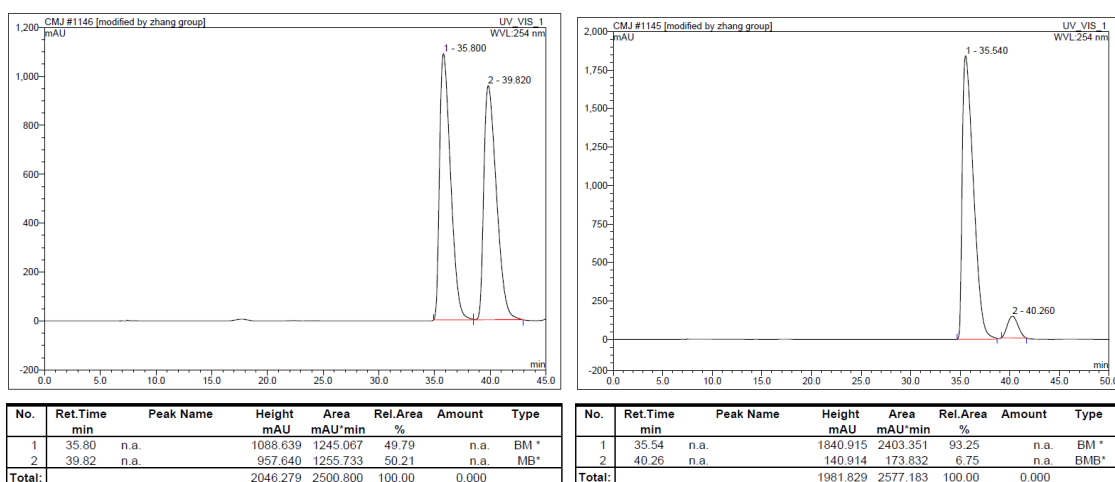

#### 4.1.27 (S)-2,2-dimethyl-5-((2E, 4E)-5-phenylpenta-2,4-dien-1-yl)tetrahydrofuran (**4l**)

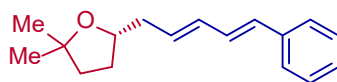

**4l**

Prepared according to typical procedure at RT for 72 hours by using [Pd(allyl)Cl]<sub>2</sub> (2.5 mol%), **Xu8** (10 mol%) from  $\gamma$ -hydroxyalkenes (0.2 mmol), NaO<sup>t</sup>Bu (0.4 mmol), alkenyl bromide (0.4 mmol) and no additive H<sub>2</sub>O, after flash column chromatography on a silica gel (petroleum ether: ethyl acetate = 80: 1) give the product **4l** as a white liquid (27 mg, 56% yield) with 83% *ee*.  $[\alpha]_D^{20} = -8.9$  (*c* = 0.4, Chloroform). <sup>1</sup>H NMR (400 MHz, Chloroform-*d*)  $\delta$  7.39 – 7.37 (m, 2H), 7.31 – 7.26 (m, 2H), 7.22 – 7.18 (m, 1H), 6.76 (dd, *J* = 16.0, 10.0 Hz, 1H), 6.46 (d, *J* = 15.6 Hz, 1H), 6.26 (dd, *J* = 15.2, 10.4 Hz, 1H), 5.87 – 5.79 (m, 1H), 4.09 – 4.02 (m, 1H), 2.49 – 2.43 (m, 1H), 2.35 – 2.28 (m, 1H), 2.06 – 1.98 (m, 1H), 1.76 – 1.64 (m, 3H), 1.27 (s, 3H), 1.24 (s, 3H). <sup>13</sup>C NMR (100 MHz, Chloroform-*d*)  $\delta$  137.5, 132.6, 131.4, 130.5, 129.3, 128.5, 127.1, 126.1, 80.7, 78.0, 39.8, 38.4, 31.3, 29.2, 28.1. HRMS (ESI) calculated for [C<sub>17</sub>H<sub>22</sub>NaO] [M+Na]<sup>+</sup>: 265.1563 found: 265.1558. Enantiomeric excess was determined by HPLC with a Chiralpak OJH column (hexanes: 2-propanol = 99: 1, 0.5 mL/min, 254 nm); major enantiomer *tr* = 19.39 min, minor enantiomer *tr* = 25.35 min.

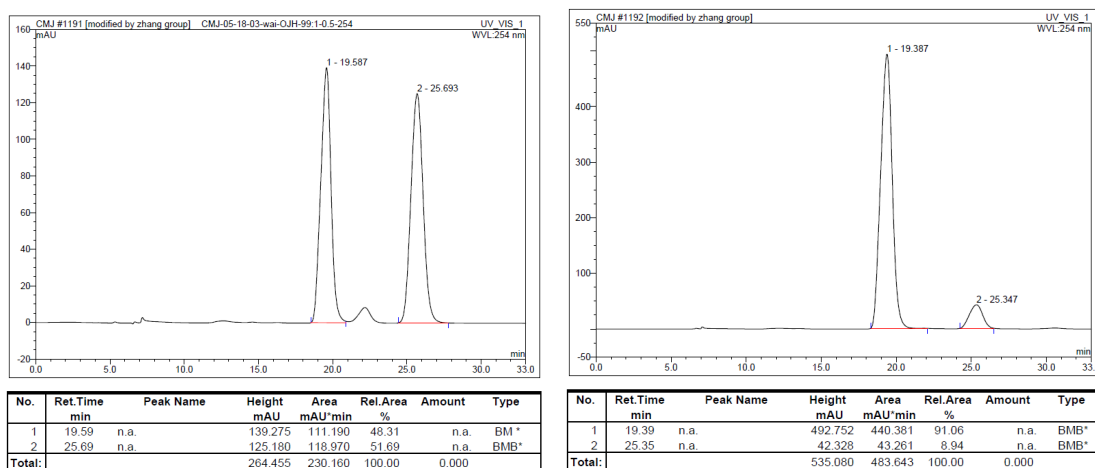

#### 4.1.29 Synthesis of (5S)-2-butyl-5-((E)-3-(4-methoxyphenyl)allyl)-2-methyltetrahydrofuran (4m)

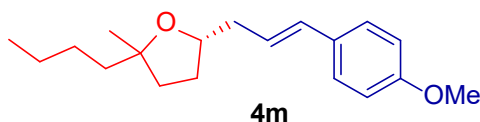

Prepared according to typical procedure at RT for 72 hours by using  $[\text{Pd}(\text{allyl})\text{Cl}]_2$  (2.5 mol%), **Xu8** (10 mol%) from  $\gamma$ -hydroxyalkenes (0.2 mmol) and alkenyl bromide (0.4 mmol), after flash column chromatography on a silica gel (petroleum ether: ethyl acetate = 50: 1) give the product **4m** as a white liquid (32 mg, 56% yield, dr : 1.1:1) with 84% *ee* (major), 93% *ee* (minor).  $[\alpha]_D^{20} = -11.2$  ( $c = 0.4$ , Chloroform).  $^1\text{H}$  NMR (400 MHz, Chloroform-*d*)  $\delta$  7.27 (d,  $J = 8.7$  Hz, 2H), 6.86 – 6.80 (m, 2H), 6.37 (ddt,  $J = 15.8, 2.8, 1.4$  Hz, 1H), 6.08 (dt,  $J = 15.9, 7.2$  Hz, 1H), 4.05 (dq,  $J = 22.6, 6.9, 5.3$  Hz, 1H), 3.79 (s, 3H), 2.50 (dddd,  $J = 13.9, 12.5, 6.9, 5.2, 1.5$  Hz, 1H), 2.34 (dtdd,  $J = 14.0, 7.1, 4.3, 1.4$  Hz, 1H), 2.06 – 1.90 (m, 1H), 1.82 – 1.73 (m, 1H), 1.70 – 1.61 (m, 2H), 1.50 (qd,  $J = 5.8, 2.1$  Hz, 1H), 1.36 – 1.29 (m, 5H), 1.19 (d,  $J = 7.8$  Hz, 3H), 0.91 – 0.87 (m, 3H).  $^{13}\text{C}$  NMR (100 MHz, Chloroform-*d*)  $\delta$  158.8, 131.2, 130.6, 127.1, 124.6, 113.9, 83.1, 78.5, 55.3, 41.5, 39.8, 36.9, 31.2, 27.1, 24.4, 22.7, 14.1. HRMS (ESI) calculated for  $[\text{C}_{19}\text{H}_{26}\text{NaO}_2]$   $[\text{M}+\text{Na}]^+$ : 309.1825 found: 309.1820. Enantiomeric excess was determined by HPLC with a Chiralpak ADH-ADH-ADH column (hexanes: 2-propanol = 99: 1, 0.6 mL/min, 254 nm); Minor [tr (minor) = 24.408 min, tr (major) = 31.454 min; 84% *ee*] major [tr (minor) = 29.766 min, tr (major) = 25.831 min; 90% *ee*].

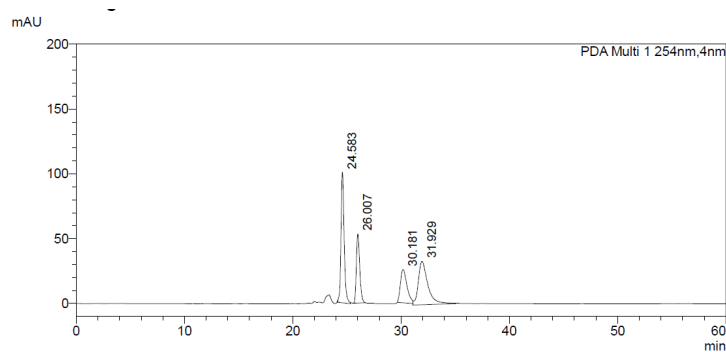

<Peak Table>

| Peak# | Ret. Time | Height | Height% | Area    | Area%   |
|-------|-----------|--------|---------|---------|---------|
| 1     | 24.583    | 100810 | 47.256  | 2031825 | 32.232  |
| 2     | 26.007    | 53356  | 25.011  | 1149676 | 18.238  |
| 3     | 30.181    | 25737  | 12.065  | 1080062 | 17.134  |
| 4     | 31.929    | 33425  | 15.668  | 2042199 | 32.397  |
| Total |           | 213329 | 100.000 | 6303763 | 100.000 |

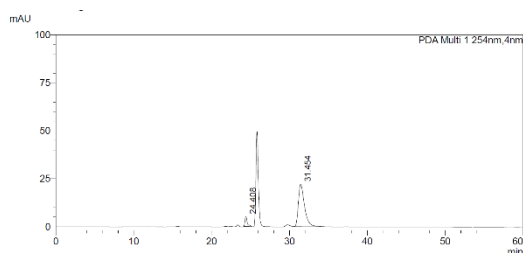

<Peak Table>

| Peak# | Ret. Time | Height | Height% | Area    | Area%   |
|-------|-----------|--------|---------|---------|---------|
| 1     | 24.408    | 5288   | 19.274  | 105439  | 8.001   |
| 2     | 31.454    | 22147  | 80.726  | 1212358 | 91.999  |
| Total |           | 27434  | 100.000 | 1317797 | 100.000 |

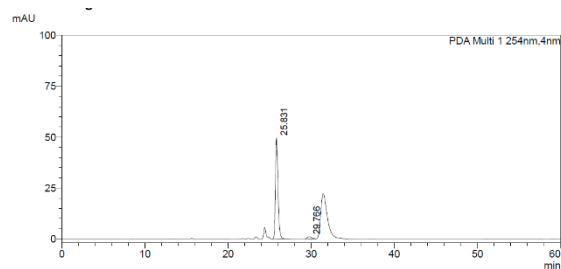

<Peak Table>

| Peak# | Ret. Time | Height | Height% | Area    | Area%   |
|-------|-----------|--------|---------|---------|---------|
| 1     | 25.931    | 49645  | 98.000  | 1073331 | 96.594  |
| 2     | 28.766    | 1013   | 2.000   | 37964   | 3.416   |
| Total |           | 50658  | 100.000 | 1111295 | 100.000 |

#### 4.1.30 Synthesis of (5*S*)-2-(but-3-en-1-yl)-5-((*E*)-3-(4-methoxyphenyl)allyl)-2-methyltetrahydrofuran (**4n**)

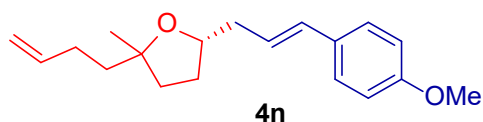

Prepared according to typical procedure at RT for 72 hours by using  $[\text{Pd}(\text{allyl})\text{Cl}]_2$  (2.5 mol%), **Xu6** (10 mol%) from  $\gamma$ -hydroxyalkenes (0.2 mmol) and alkenyl bromide (0.4 mmol), after flash column chromatography on a silica gel (petroleum ether: ethyl acetate = 50: 1) give the product **4n** as a white liquid (27 mg, 52% yield, dr : 2:1) with 82% *ee* (major), 80% *ee* (minor).  $[\alpha]_D^{20} = -7.1$  ( $c = 0.4$ , Chloroform).  $^1\text{H}$  NMR (400 MHz, Chloroform-*d*)  $\delta$  7.28 (d,  $J = 8.5$  Hz, 2H), 6.83 (dd,  $J = 8.6, 1.5$  Hz, 2H), 6.38 (dd,  $J = 15.9, 2.8$  Hz, 1H), 6.17 – 6.00 (m, 1H), 5.85 (ddt,  $J = 16.8, 10.2, 6.5$  Hz, 1H), 5.09 – 4.79 (m, 2H), 4.17 – 3.93 (m, 1H), 3.80 (s, 3H), 2.56 – 2.44 (m, 1H), 2.36 (dtd,  $J = 14.1, 7.1, 1.3$  Hz, 1H), 2.23 – 2.06 (m, 2H), 2.06 – 1.94 (m, 1H), 1.86 – 1.73 (m, 1H), 1.67 (dddd,  $J = 20.1, 10.1, 7.4, 5.4$  Hz, 4H), 1.26 – 1.20 (m, 3H).  $^{13}\text{C}$  NMR (100 MHz, Chloroform-*d*)  $\delta$  158.8, 139.1, 131.3, 130.5, 127.1, 124.5, 114.0, 113.9, 82.8, 78.6, 55.3, 40.4, 39.8, 37.0, 31.2, 29.0,

27.1.RMS (ESI) calculated for [C<sub>19</sub>H<sub>26</sub>NaO<sub>2</sub>] [M+Na]<sup>+</sup>: 309.1825 found: 309.1820. Enantiomeric excess was determined by HPLC with a Chiralpak OJH-OJH-OJ3 column (hexanes: 2-propanol = 99.5: 0.5, 0.6 mL/min, 254 nm); Minor [tr (minor) = 86.695 min, tr (major) = 81.929 min; 80% ee] major [tr (minor) = 90.829 min, tr (major) = 84.875 min; 92% ee]

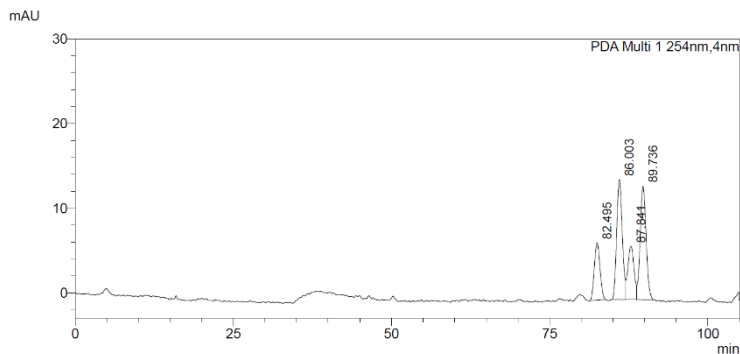

<Peak Table>

| Peak# | Ret. Time | Height | Height% | Area    | Area%   |
|-------|-----------|--------|---------|---------|---------|
| 1     | 82.495    | 6753   | 16.614  | 421079  | 16.146  |
| 2     | 86.003    | 14167  | 34.854  | 874184  | 33.520  |
| 3     | 87.841    | 6320   | 15.550  | 429223  | 16.458  |
| 4     | 89.736    | 13406  | 32.982  | 883432  | 33.875  |
| Total |           | 40646  | 100.000 | 2607918 | 100.000 |

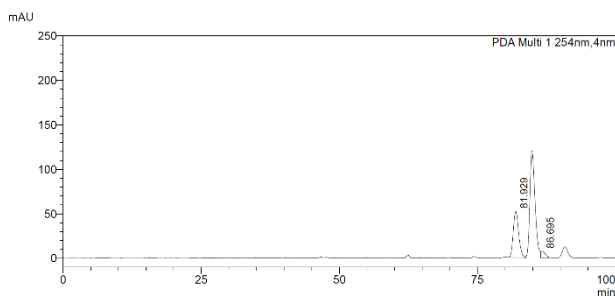

<Peak Table>

| Peak# | Ret. Time | Height | Height% | Area    | Area%   |
|-------|-----------|--------|---------|---------|---------|
| 1     | 81.929    | 51645  | 87.926  | 3507763 | 90.103  |
| 2     | 86.695    | 7092   | 12.074  | 389309  | 9.897   |
| Total |           | 58737  | 100.000 | 3893072 | 100.000 |

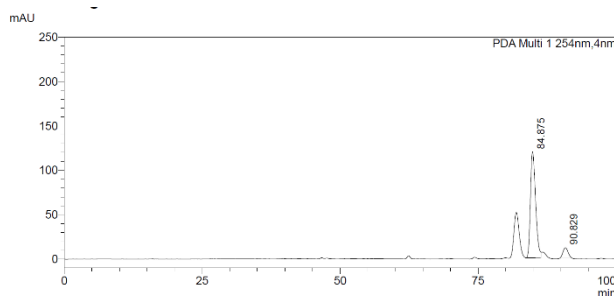

<Peak Table>

| Peak# | Ret. Time | Height | Height% | Area    | Area%   |
|-------|-----------|--------|---------|---------|---------|
| 1     | 84.875    | 119152 | 90.954  | 7727271 | 90.951  |
| 2     | 90.829    | 11850  | 9.046   | 768775  | 9.049   |
| Total |           | 131003 | 100.000 | 8496045 | 100.000 |

#### 4.1.31 Synthesis of (2*R*)-2-cinnamyl-5-methyltetrahydrofuran (**4o**)

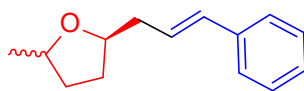

**4o**

Prepared according to typical procedure at -20 °C for 72 hours by using [Pd(allyl)Cl]<sub>2</sub> (2.5 mol%), (*R, R*)-**Xu9** (10 mol%) from  $\gamma$ -hydroxyalkenes (0.5 mmol) and alkenyl bromide (1 mmol), after flash column chromatography on a silica gel (petroleum ether: ethyl acetate = 50: 1) give the product **4o** as a white liquid (21 mg, 21% yield, dr = 1.1:1, 94% ee(major), 80% ee (minor).  $[\alpha]_D^{20} = 4.3$  ( $c = 0.4$ , Chloroform). <sup>1</sup>H NMR (400 MHz, Chloroform-*d*)  $\delta$  7.39 – 7.33 (m, 2H), 7.29 (dd,  $J = 8.5, 6.7$  Hz, 2H), 7.23 – 7.16 (m, 1H), 6.48 – 6.40 (m, 1H), 6.23 (dtd,  $J = 15.8, 7.1, 5.4$  Hz, 1H),



4.14 (ddt,  $J = 8.1, 5.8, 3.4$  Hz, 1H), 3.97 (dq,  $J = 12.5, 6.3, 2.7$  Hz, 1H), 2.52 (dddd,  $J = 14.2, 10.2, 7.2, 5.8, 1.4$  Hz, 1H), 2.46 – 2.31 (m, 1H), 2.05 (dddd,  $J = 12.7, 11.3, 5.6, 2.6$  Hz, 1H), 2.00 – 1.91 (m, 1H), 1.68 – 1.61 (m, 1H), 1.46 (dddd,  $J = 11.8, 9.8, 8.4, 4.9, 3.5$  Hz, 1H), 1.24 (dd,  $J = 13.0, 6.0$  Hz, 3H).  $^{13}\text{C}$  NMR (100 MHz, Chloroform- $d$ )  $\delta$  137.6, 132.0, 128.5, 127.0, 126.8, 126.1, 78.9, 75.5, 39.7, 33.9, 31.8, 21.4. HRMS (ESI) calculated for  $[\text{C}_{14}\text{H}_{19}\text{O}] [\text{M}+\text{H}]^+$ : 203.1430 found: 203.1435. Enantiomeric excess was determined by HPLC with a Chiralpak OD-H column (hexanes: 2-propanol = 95: 5, 0.6 mL/min, 254 nm); Minor [tr (minor) = 7.887 min, tr (major) = 8.362 min; 80% ee] major [tr (minor) = 10.327 min, tr (major) = 7.119 min; 94% ee]

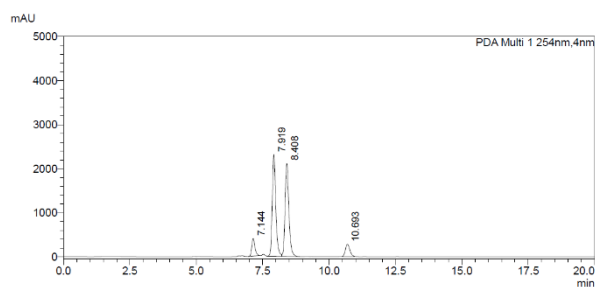

<Peak Table>  
PDA Ch1 254nm

| Peak# | Ret. Time | Height  | Height% | Area     | Area%   |
|-------|-----------|---------|---------|----------|---------|
| 1     | 7.144     | 398617  | 7.818   | 3318975  | 6.840   |
| 2     | 7.919     | 2310089 | 45.308  | 21087685 | 43.460  |
| 3     | 8.408     | 2114753 | 41.477  | 20906902 | 43.088  |
| 4     | 10.693    | 275171  | 5.397   | 3208193  | 6.612   |
| Total |           | 5098630 | 100.000 | 48521755 | 100.000 |

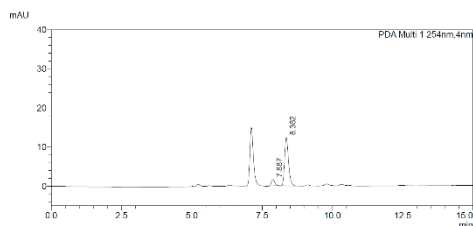

<Peak Table>  
PDA Ch1 254nm

| Peak# | Ret. Time | Height | Height% | Area   | Area%   |
|-------|-----------|--------|---------|--------|---------|
| 1     | 7.887     | 1587   | 11.408  | 13350  | 10.134  |
| 2     | 8.362     | 12321  | 88.592  | 118386 | 89.866  |
| Total |           | 13908  | 100.000 | 131736 | 100.000 |

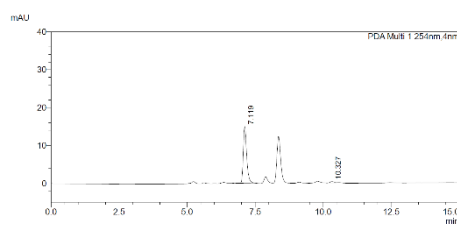

<Peak Table>  
PDA Ch1 254nm

| Peak# | Ret. Time | Height | Height% | Area   | Area%   |
|-------|-----------|--------|---------|--------|---------|
| 1     | 7.119     | 14973  | 97.453  | 132553 | 86.847  |
| 2     | 10.327    | 391    | 2.547   | 4174   | 3.053   |
| Total |           | 15364  | 100.000 | 136727 | 100.000 |

#### 4.1.32 (*S, E*)-2-(3-(4-methoxyphenyl)-allyl)-2-methyl-1-oxaspiro[4.5]decane (**6a**)

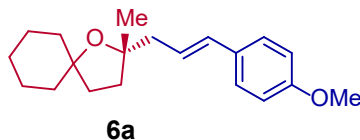

Prepared according to typical procedure at RT for 72 hours by using  $[\text{Pd}(\text{allyl})\text{Cl}]_2$  (2.5 mol%), **Xu8** (10 mol%) from  $\gamma$ -hydroxyalkenes (0.2 mmol) and alkenyl bromide (0.4 mmol), after flash column chromatography on a silica gel (petroleum ether: ethyl acetate = 80: 1) give the product **6a** as a white liquid (38 mg, 63% yield) with 88% *ee*.  $[\alpha]_{\text{D}}^{20} = -6.1$  ( $c = 0.4$ , Chloroform).  $^1\text{H}$  NMR (400 MHz, Chloroform- $d$ )  $\delta$  7.28 (d,  $J = 8.8$  Hz, 2H), 6.84 (d,  $J = 8.8$  Hz, 2H), 6.33 (d,  $J = 15.6$  Hz, 1H),

6.15 – 6.08 (m, 1H), 3.80 (s, 3H), 2.38 – 2.35 (m, 2H), 1.97 – 1.92 (m, 1H), 1.85 – 1.76 (m, 2H), 1.72 – 1.64 (m, 5H), 1.56 – 1.51 (m, 4H), 1.34 – 1.28 (m, 2H), 1.24 (s, 3H).  $^{13}\text{C}$  NMR (100 MHz, Chloroform-*d*)  $\delta$  158.7, 131.6, 130.7, 127.1, 125.1, 113.9, 83.4, 82.4, 55.3, 46.0, 39.4, 38.8, 35.7, 28.4, 25.7, 24.2. HRMS (ESI) calculated for  $[\text{C}_{20}\text{H}_{28}\text{NaO}_2]$   $[\text{M}+\text{Na}]^+$ : 323.1982 found: 323.1972. Enantiomeric excess was determined by HPLC with a Chiralpak ADH+ADH column (hexanes: 2-propanol = 99: 1, 0.5 mL/min, 254 nm); major enantiomer  $t_r$  = 24.63 min, minor enantiomer  $t_r$  = 19.59 min.

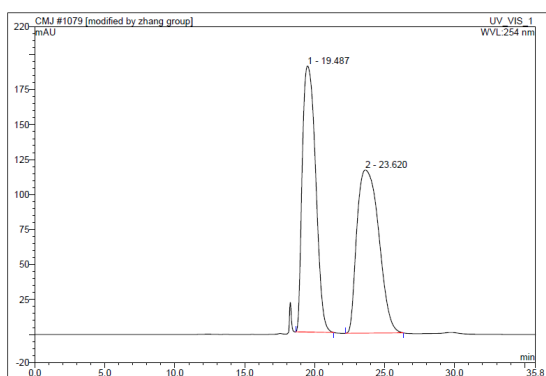

| No.    | Ret.Time min | Peak Name | Height mAU | Area mAU*min | Rel.Area % | Amount | Type |
|--------|--------------|-----------|------------|--------------|------------|--------|------|
| 1      | 19.49        | n.a.      | 190.105    | 209.880      | 49.81      | n.a.   | BMB* |
| 2      | 23.62        | n.a.      | 116.605    | 211.479      | 50.19      | n.a.   | BMB* |
| Total: |              |           | 306.709    | 421.359      | 100.00     | 0.000  |      |

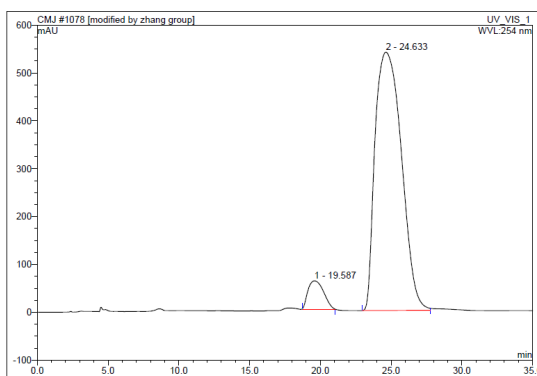

| No.    | Ret.Time min | Peak Name | Height mAU | Area mAU*min | Rel.Area % | Amount | Type |
|--------|--------------|-----------|------------|--------------|------------|--------|------|
| 1      | 19.59        | n.a.      | 59.535     | 76.526       | 6.16       | n.a.   | MB*  |
| 2      | 24.63        | n.a.      | 539.830    | 1106.426     | 93.84      | n.a.   | BM*  |
| Total: |              |           | 599.365    | 1242.952     | 100.00     | 0.000  |      |

#### 4.1.33 (S)-2-cinnamyl-2-methyl-1-oxaspiro[4.4]nonane (6b)

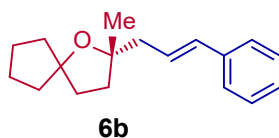

Prepared according to typical procedure at RT for 72 hours by using  $[\text{Pd}(\text{allyl})\text{Cl}]_2$  (2.5 mol%), **Xu8** (10 mol%) from  $\gamma$ -hydroxyalkenes (0.2 mmol) and alkenyl bromide (0.4 mmol), after flash column chromatography on a silica gel (petroleum ether: ethyl acetate = 80: 1) give the product **6b** as a white liquid (47 mg, 91% yield) with 90% *ee*.  $[\alpha]_{\text{D}}^{20} = -4.1$  ( $c = 0.4$ , Chloroform).  $^1\text{H}$  NMR (400 MHz, Chloroform-*d*)  $\delta$  7.38 – 7.36 (m, 2H), 7.32 – 7.28 (m, 2H), 7.23 – 7.17 (m, 1H), 6.41 (d,  $J = 16.0$  Hz, 1H), 6.30 – 6.22 (m, 1H), 2.42 – 2.39 (m, 2H), 1.97 – 1.87 (m, 3H), 1.84 – 1.72 (m, 5H), 1.64 – 1.53 (m, 4H), 1.26 (s, 3H).  $^{13}\text{C}$  NMR (100 MHz, Chloroform-*d*)  $\delta$  137.7, 132.3, 128.4, 127.2, 126.9, 126.0, 91.5, 82.6, 45.9, 39.8, 39.4, 37.2, 36.6, 28.0, 23.9, 23.8. HRMS (ESI) calculated for  $[\text{C}_{18}\text{H}_{24}\text{NaO}]$   $[\text{M}+\text{Na}]^+$ : 279.1719 found: 279.1717. Enantiomeric excess was determined by HPLC

with a Chiralpak IA+IA column (hexanes: 2-propanol = 99: 1, 0.3 mL/min, 254 nm); major enantiomer  $t_r = 29.01$  min, minor enantiomer  $t_r = 28.07$  min.

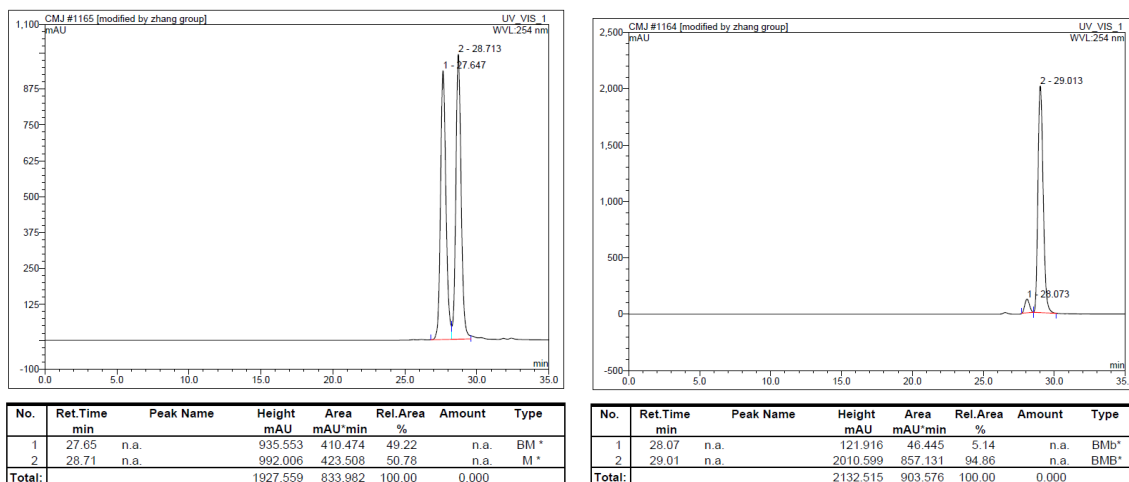

#### 4.1.34 (*S, E*)-2-(3-(4-methoxyphenyl)-allyl)-2-methyl-1-oxaspiro[4.4]nonane (**6c**)

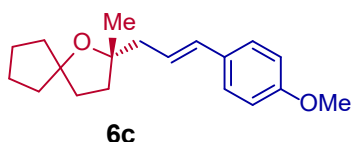

Prepared according to typical procedure at RT for 72 hours by using  $[\text{Pd}(\text{allyl})\text{Cl}]_2$  (2.5 mol%), **Xu8** (10 mol%) from  $\gamma$ -hydroxyalkenes (0.2 mmol) and alkenyl bromide (0.4 mmol), after flash column chromatography on a silica gel (petroleum ether: ethyl acetate = 80: 1) give the product **6c** as a white liquid (51 mg, 90% yield) with 90% *ee*.  $[\alpha]_D^{20} = -5.2$  ( $c = 0.4$ , Chloroform).  $^1\text{H}$  NMR (400 MHz, Chloroform-*d*)  $\delta$  7.29 (d,  $J = 8.8$  Hz, 2H), 6.84 (d,  $J = 8.8$  Hz, 2H), 6.35 (d,  $J = 15.6$  Hz, 1H), 6.14 – 6.07 (m, 1H), 3.79 (s, 3H), 2.40 – 2.37 (m, 2H), 1.98 – 1.86 (m, 3H), 1.83 – 1.70 (m, 5H), 1.63 – 1.54 (m, 4H), 1.25 (s, 3H).  $^{13}\text{C}$  NMR (100 MHz, Chloroform-*d*)  $\delta$  158.7, 131.6, 130.6, 127.0, 124.9, 113.9, 91.4, 82.7, 55.2, 45.8, 39.7, 39.4, 37.2, 36.5, 27.9, 23.8, 23.8. HRMS (ESI) calculated for  $[\text{C}_{19}\text{H}_{26}\text{NaO}_2]$   $[\text{M}+\text{Na}]^+$ : 309.1825 found: 309.1832. Enantiomeric excess was determined by HPLC with a Chiralpak IC+IC column (hexanes: 2-propanol = 99: 1, 0.5 mL/min, 254 nm); major enantiomer  $t_r = 20.47$  min, minor enantiomer  $t_r = 25.47$  min.

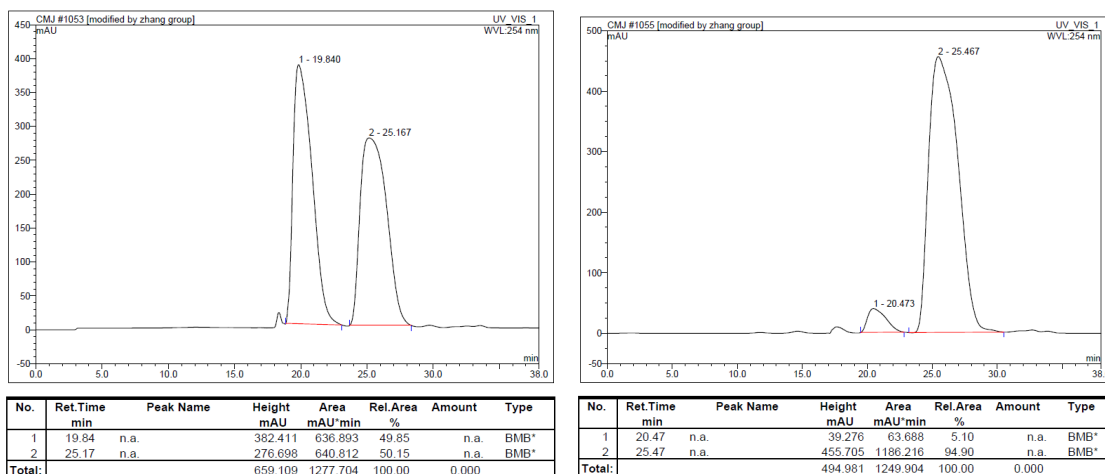

#### 4.1.35 (*S, E*)-2-(3-(2-methoxyphenyl)-allyl)-2-methyl-1-oxaspiro[4.4]nonane (**6d**)

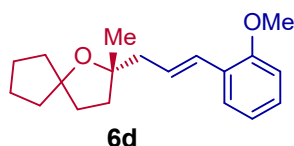

Prepared according to typical procedure at RT for 72 hours by using  $[\text{Pd}(\text{allyl})\text{Cl}]_2$  (2.5 mol%), **Xu8** (10 mol%) from  $\gamma$ -hydroxyalkenes (0.2 mmol) and alkenyl bromide (0.4 mmol), after flash column chromatography on a silica gel (petroleum ether: ethyl acetate = 80: 1) give the product **6d** as a white liquid (59 mg, 91% yield) with 91% *ee*.  $[\alpha]_{\text{D}}^{20} = -9.7$  ( $c = 0.4$ , Chloroform).  $^1\text{H}$  NMR (400 MHz, Chloroform-*d*)  $\delta$  7.45 (dd,  $J = 7.6, 2.0$  Hz, 1H), 7.21 – 7.17 (m, 1H), 6.92 (t,  $J = 7.6$  Hz, 1H), 6.86 (d,  $J = 8.4$  Hz, 1H), 6.74 (d,  $J = 16.0$  Hz, 1H), 6.29 – 6.22 (m, 1H), 3.84 (s, 3H), 2.49 – 2.38 (m, 2H), 2.01 – 1.94 (m, 1H), 1.92 – 1.88 (m, 2H), 1.84 – 1.69 (m, 5H), 1.64 – 1.53 (m, 4H), 1.27 (s, 3H).  $^{13}\text{C}$  NMR (100 MHz, Chloroform-*d*)  $\delta$  156.3, 127.8, 127.7, 126.8, 126.8, 126.4, 120.6, 110.8, 91.4, 82.7, 55.4, 46.3, 39.8, 39.4, 37.2, 36.4, 28.0, 23.9, 23.8. HRMS (ESI) calculated for  $[\text{C}_{19}\text{H}_{26}\text{NaO}_2]$   $[\text{M}+\text{Na}]^+$ : 309.1825 found: 309.1817. Enantiomeric excess was determined by HPLC with a Chiralpak OJH+OJ3 column (hexanes: 2-propanol = 99: 1, 0.5 mL/min, 254 nm); major enantiomer  $t_{\text{r}} = 41.54$  min, minor enantiomer  $t_{\text{r}} = 24.25$  min.

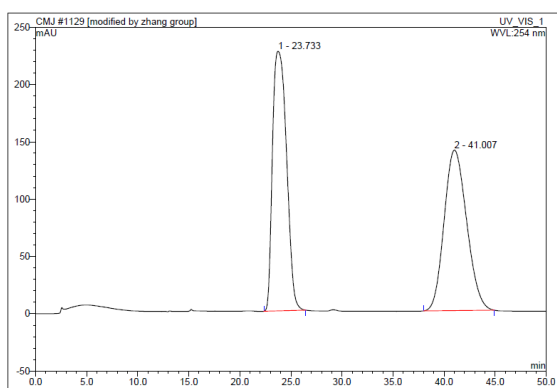

| No.           | Ret.Time<br>min | Peak Name | Height<br>mAU  | Area<br>mAU*min | Rel.Area<br>% | Amount       | Type |
|---------------|-----------------|-----------|----------------|-----------------|---------------|--------------|------|
| 1             | 23.73           | n.a.      | 228.529        | 360.978         | 50.17         | n.a.         | BMB* |
| 2             | 41.01           | n.a.      | 140.060        | 358.584         | 49.83         | n.a.         | BMB* |
| <b>Total:</b> |                 |           | <b>366.589</b> | <b>719.573</b>  | <b>100.00</b> | <b>0.000</b> |      |

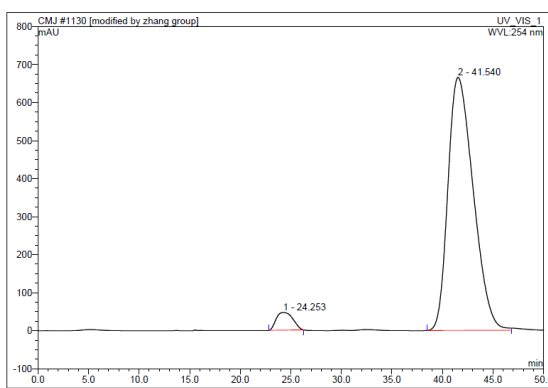

| No.           | Ret.Time<br>min | Peak Name | Height<br>mAU  | Area<br>mAU*min | Rel.Area<br>% | Amount       | Type |
|---------------|-----------------|-----------|----------------|-----------------|---------------|--------------|------|
| 1             | 24.25           | n.a.      | 46.364         | 88.746          | 4.40          | n.a.         | BMB* |
| 2             | 41.54           | n.a.      | 665.365        | 1929.304        | 95.60         | n.a.         | BM*  |
| <b>Total:</b> |                 |           | <b>711.729</b> | <b>2018.050</b> | <b>100.00</b> | <b>0.000</b> |      |

#### 4.1.36 (*S, E*)-2-(3-(4-fluorophenyl)-allyl)-2-methyl-1-oxaspiro[4.4]nonane (**6e**)

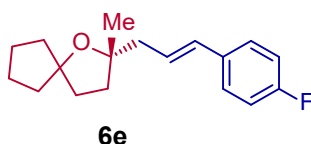

Prepared according to typical procedure at RT for 72 hours by using  $[\text{Pd}(\text{allyl})\text{Cl}]_2$  (2.5 mol%), **Xu8** (10 mol%) from  $\gamma$ -hydroxyalkenes (0.2 mmol) and alkenyl bromide (0.4 mmol), after flash column chromatography on a silica gel (petroleum ether: ethyl acetate = 80: 1) give the product **6e** as a white liquid (54 mg, 93% yield) with 90% *ee*.  $[\alpha]_{\text{D}}^{20} = -1.5$  ( $c = 0.4$ , Chloroform).  $^1\text{H}$  NMR (400 MHz, Chloroform-*d*)  $\delta$  7.32 – 7.29 (m, 2H), 7.00 – 6.95 (m, 2H), 6.36 (d,  $J = 15.6$  Hz, 1H), 6.20 – 6.12 (m, 1H), 2.38 (d,  $J = 7.2$  Hz, 2H), 1.96 – 1.90 (m, 2H), 1.87 – 1.85 (m, 1H), 1.83 – 1.71 (m, 5H), 1.63 – 1.54 (m, 4H), 1.24 (s, 3H).  $^{13}\text{C}$  NMR (100 MHz, Chloroform-*d*)  $\delta$  161.9 (d,  $J = 244.2$  Hz), 133.9 (d,  $J = 3.3$  Hz), 131.1, 127.4 (d,  $J = 7.8$  Hz), 126.9 (d,  $J = 2.2$  Hz), 115.3 (d,  $J = 21.4$  Hz), 91.5, 82.5, 45.8, 39.7, 39.4, 37.2, 36.6, 27.9, 23.8, 23.8.  $^{19}\text{F}$  NMR (376 MHz, Chloroform-*d*)  $\delta$  -115.6. HRMS (ESI) calculated for  $[\text{C}_{18}\text{H}_{23}\text{NaFO}]$   $[\text{M}+\text{Na}]^+$ : 297.1625 found: 297.1613. Enantiomeric excess was determined by HPLC with a Chiralpak OJH column (hexanes: 2-propanol = 99: 1, 0.5 mL/min, 254 nm); major enantiomer  $t_r = 13.48$  min, minor enantiomer  $t_r = 8.69$  min.

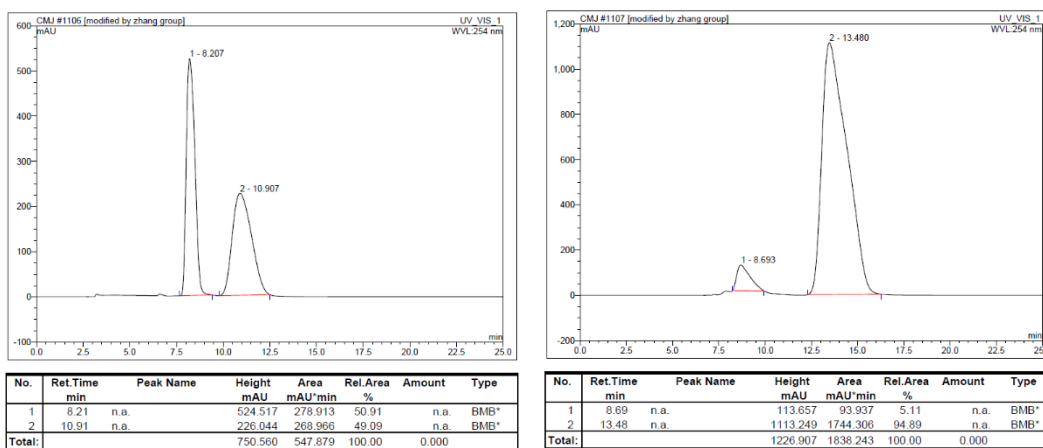

#### 4.1.37 (*S, E*)-2-methyl-2-(3-(naphthalen-1-yl)-allyl)-1-oxaspiro[4.4]nonane (**6f**)

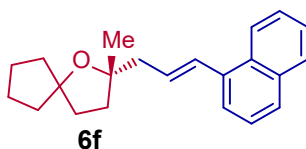

Prepared according to typical procedure at RT for 72 hours by using  $[\text{Pd}(\text{allyl})\text{Cl}]_2$  (2.5 mol%), **Xu8** (10 mol%) from  $\gamma$ -hydroxyalkenes (0.2 mmol) and alkenyl bromide (0.4 mmol), after flash column chromatography on a silica gel (petroleum ether: ethyl acetate = 80: 1) give the product **6f** as a white liquid (59 mg, 95% yield) with 91% *ee*.  $[\alpha]_D^{20} = -12.2$  ( $c = 0.4$ , Chloroform).  $^1\text{H}$  NMR (400 MHz, Chloroform-*d*)  $\delta$  8.16 (d,  $J = 7.6$  Hz, 1H), 7.86 (dd,  $J = 7.6, 2.4$  Hz, 1H), 7.77 (d,  $J = 8.0$  Hz, 1H), 7.60 (d,  $J = 7.2$  Hz, 1H), 7.55 – 7.44 (m, 3H), 7.18 (d,  $J = 15.6$  Hz, 1H), 6.33 – 6.26 (m, 1H), 2.56 (d,  $J = 7.2$  Hz, 2H), 2.08 – 1.99 (m, 1H), 1.96 – 1.92 (m, 2H), 1.87 – 1.76 (m, 5H), 1.67 – 1.55 (m, 4H), 1.34 (s, 3H).  $^{13}\text{C}$  NMR (100 MHz, Chloroform-*d*)  $\delta$  135.5, 133.6, 131.1, 130.4, 129.5, 128.4, 127.3, 125.8, 125.6, 125.6, 123.9, 123.5, 91.5, 82.6, 46.3, 39.8, 39.5, 37.3, 36.6, 28.0, 23.9, 23.8. HRMS (ESI) calculated for  $[\text{C}_{22}\text{H}_{26}\text{NaO}]$   $[\text{M}+\text{Na}]^+$ : 329.1876 found: 329.1878. Enantiomeric excess was determined by HPLC with a Chiralpak OJH+OJ3 column (hexanes: 2-propanol = 99: 1, 0.5 mL/min, 210 nm); major enantiomer  $t_r = 29.83$  min, minor enantiomer  $t_r = 26.73$  min.

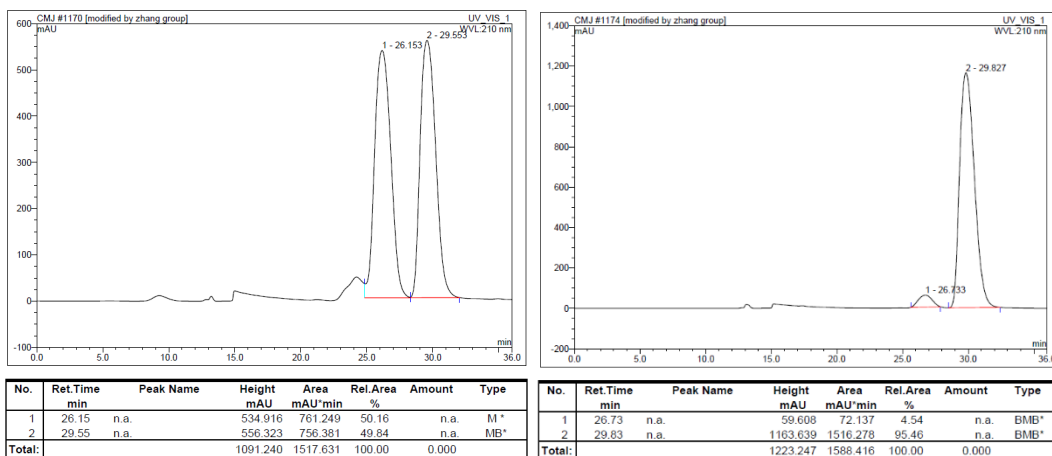

#### 4.1.38 (*S, E*)-2-methyl-2-(3-(naphthalen-2-yl)-allyl)-1-oxaspiro[4.4]nonane (**6g**)

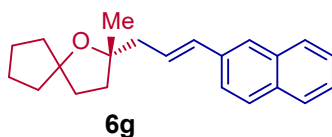

Prepared according to typical procedure at RT for 72 hours by using  $[\text{Pd}(\text{allyl})\text{Cl}]_2$  (2.5 mol%), **Xu8** (10 mol%) from  $\gamma$ -hydroxyalkenes (0.2 mmol) and alkenyl bromide (0.4 mmol), after flash column chromatography on a silica gel (petroleum ether: ethyl acetate = 80: 1) give the product **6g** as a white liquid (58 mg, 95% yield) with 87% *ee*.  $[\alpha]_{\text{D}}^{20} = -7.8$  ( $c = 0.4$ , Chloroform).  $^1\text{H}$  NMR (400 MHz, Chloroform-*d*)  $\delta$  7.81 – 7.73 (m, 3H), 7.71 (s, 1H), 7.62 (d,  $J = 8.8$  Hz, 1H), 7.48 – 7.41 (m, 2H), 6.59 (d,  $J = 16.0$  Hz, 1H), 6.44 – 6.37 (m, 1H), 2.48 (d,  $J = 7.2$  Hz, 2H), 2.07 – 1.98 (m, 1H), 1.94 – 1.90 (m, 2H), 1.87 – 1.76 (m, 5H), 1.66 – 1.55 (m, 4H), 1.31 (s, 3H).  $^{13}\text{C}$  NMR (100 MHz, Chloroform-*d*)  $\delta$  135.2, 133.6, 132.7, 132.4, 128.0, 127.8, 127.6, 127.6, 126.1, 125.5, 125.4, 123.6, 91.5, 82.7, 46.0, 39.7, 39.4, 37.2, 36.6, 28.0, 23.9, 23.8. HRMS (ESI) calculated for  $[\text{C}_{22}\text{H}_{26}\text{NaO}]$   $[\text{M}+\text{Na}]^+$ : 329.1876 found: 329.1872. Enantiomeric excess was determined by HPLC with a Chiralpak OJH+OJH column (hexanes: 2-propanol = 99: 1, 0.5 mL/min, 254 nm); major enantiomer  $t_r = 50.95$  min, minor enantiomer  $t_r = 47.92$  min.

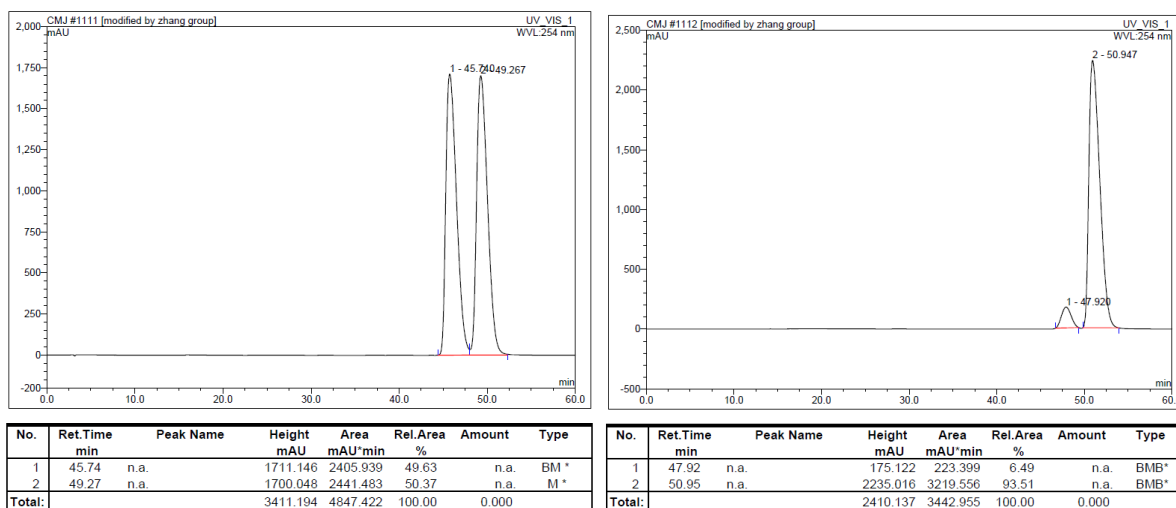

#### 4.1.39 (*S*)-2-methyl-2-((*2E*, *4E*)-5-phenylpenta-2,4-dien-1-yl)-1-oxaspiro[4.4]nonane (**6h**)

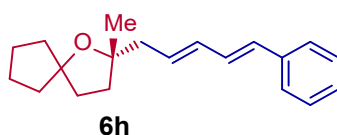

Prepared according to typical procedure at RT for 72 hours by using  $[\text{Pd}(\text{allyl})\text{Cl}]_2$  (2.5 mol%), **Xu8** (10 mol%) from  $\gamma$ -hydroxyalkenes (0.2 mmol) and alkenyl bromide (0.4 mmol), after flash column chromatography on a silica gel (petroleum ether: ethyl acetate = 80: 1) give the product **6h** as a white liquid (57 mg, 96% yield) with 92% *ee*.  $[\alpha]_D^{20} = -13.1$  ( $c = 0.4$ , Chloroform).  $^1\text{H}$  NMR (400 MHz, Chloroform-*d*)  $\delta$  7.40 – 7.38 (m, 2H), 7.33 – 7.29 (m, 2H), 7.23 – 7.18 (m, 1H), 6.79 (dd,  $J = 15.6, 10.4$  Hz, 1H), 6.47 (d,  $J = 15.6$  Hz, 1H), 6.24 (dd,  $J = 15.2, 10.4$  Hz, 1H), 5.90 – 5.82 (m, 1H), 2.35 (d,  $J = 7.6$  Hz, 2H), 1.93 – 1.87 (m, 3H), 1.81 – 1.71 (m, 5H), 1.64 – 1.50 (m, 4H), 1.24 (s, 3H).  $^{13}\text{C}$  NMR (100 MHz, Chloroform-*d*)  $\delta$  137.5, 133.0, 131.8, 130.4, 129.3, 128.5, 127.1, 126.1, 91.4, 82.6, 45.8, 39.7, 39.4, 37.2, 36.7, 27.8, 23.9, 23.8. HRMS (ESI) calculated for  $[\text{C}_{20}\text{H}_{26}\text{NaO}]$   $[\text{M}+\text{Na}]^+$ : 305.1876 found: 305.1874. Enantiomeric excess was determined by HPLC with a Chiralpak OJH+OJ3 column (hexanes: 2-propanol = 99: 1, 0.5 mL/min, 254 nm); major enantiomer  $t_r = 30.16$  min, minor enantiomer  $t_r = 28.13$  min.



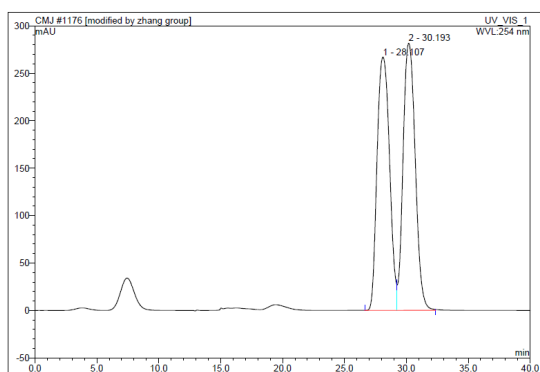

| No.    | Ret. Time min | Peak Name | Height mAU | Area mAU*min | Rel. Area % | Amount | Type |
|--------|---------------|-----------|------------|--------------|-------------|--------|------|
| 1      | 28.11         | n.a.      | 267.061    | 312.245      | 49.30       | n.a.   | BM * |
| 2      | 30.19         | n.a.      | 281.624    | 321.071      | 50.70       | n.a.   | M *  |
| Total: |               |           | 548.684    | 633.316      | 100.00      | 0.000  |      |

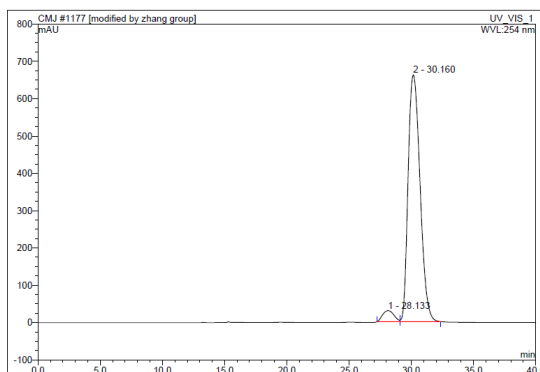

| No.    | Ret. Time min | Peak Name | Height mAU | Area mAU*min | Rel. Area % | Amount | Type |
|--------|---------------|-----------|------------|--------------|-------------|--------|------|
| 1      | 28.13         | n.a.      | 29.427     | 31.134       | 4.07        | n.a.   | BM * |
| 2      | 30.16         | n.a.      | 661.171    | 733.290      | 95.93       | n.a.   | MB * |
| Total: |               |           | 690.599    | 764.424      | 100.00      | 0.000  |      |

## 4.2 General Procedure for reactions of 4-penten-1-ol with alkenyl bromides

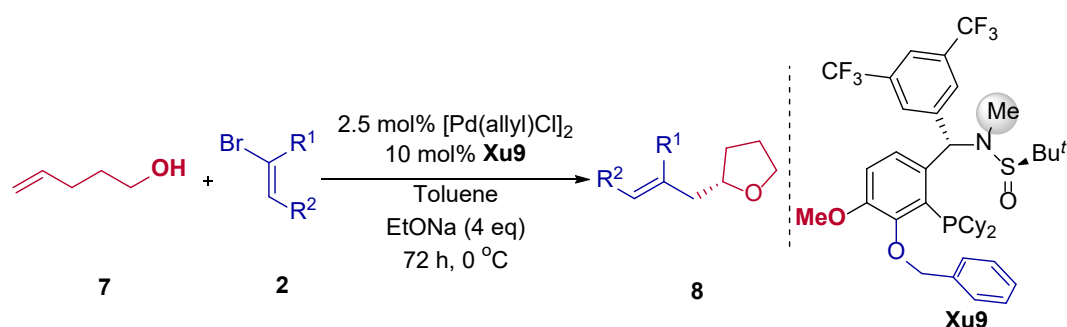

To a sealed tube was added  $[\text{Pd}(\text{allyl})\text{Cl}]_2$  (2.5 mol%), **Xu9** (10 mol%). The flask was evacuated and refilled with argon. Then  $\gamma$ -hydroxyalkenes (0.5 mmol), alkenyl halides (1 mmol), EtONa (4.0 equiv.), and solution of toluene (3.5 mL) was added to the tube, and stirred at 0 °C for 72 hours. After the reaction was complete (monitored by TLC), solvent was removed under reduced pressure. The crude product was then purified by flash column chromatography on silica gel to afford the desired product.

### 4.2.1 Synthesis of (*S, E*)-2-(3-(4-methoxyphenyl)allyl)tetrahydrofuran (**8a**)

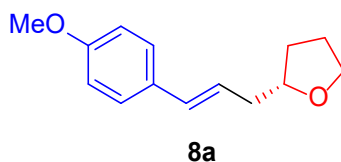

Prepared according to typical procedure at 0 °C for 72 hours by using  $[\text{Pd}(\text{allyl})\text{Cl}]_2$  (2.5 mol%), **Xu9** (10 mol%) from  $\gamma$ -hydroxyalkenes (0.5 mmol) and alkenyl bromide (1 mmol), after flash column chromatography on a silica gel (petroleum ether: ethyl acetate = 50: 1) give the product **8a** as a white liquid (74 mg, 68% yield) with 92% ee.  $[\alpha]_D^{20} = -2.4$  ( $c = 0.4$ , Chloroform).  $^1\text{H}$  NMR (400 MHz, Chloroform-*d*)  $\delta$  7.35 – 7.23 (m, 2H), 6.87 – 6.79 (m, 2H), 6.40 (d,  $J = 15.8$  Hz, 1H), 6.09 (dt,

$J = 15.7, 7.1$  Hz, 1H), 4.02 – 3.84 (m, 2H), 3.79 (s, 3H), 3.74 (q,  $J = 7.4$  Hz, 1H), 2.53 – 2.42 (m, 1H), 2.43 – 2.31 (m, 1H), 1.99 (tdd,  $J = 11.4, 7.0, 4.8$  Hz, 1H), 1.89 (ddd,  $J = 12.3, 7.8, 6.2$  Hz, 2H), 1.56 (dq,  $J = 11.7, 7.8$  Hz, 1H).  $^{13}\text{C}$  NMR (100 MHz, Chloroform- $d$ )  $\delta$  158.8, 131.3, 130.4, 127.2, 124.6, 113.9, 78.9, 68.0, 55.3, 39.3, 30.9, 25.8. HRMS (ESI) calculated for  $[\text{C}_{14}\text{H}_{18}\text{NaO}_2]$   $[\text{M}+\text{Na}]^+$ : 241.1199 found: 241.1199. Enantiomeric excess was determined by HPLC with a Chiralpak OD-H column (hexanes: 2-propanol = 97: 3, 0.6 mL/min, 254 nm); major enantiomer  $t_r = 15.290$  min, minor enantiomer  $t_r = 13.051$  min.

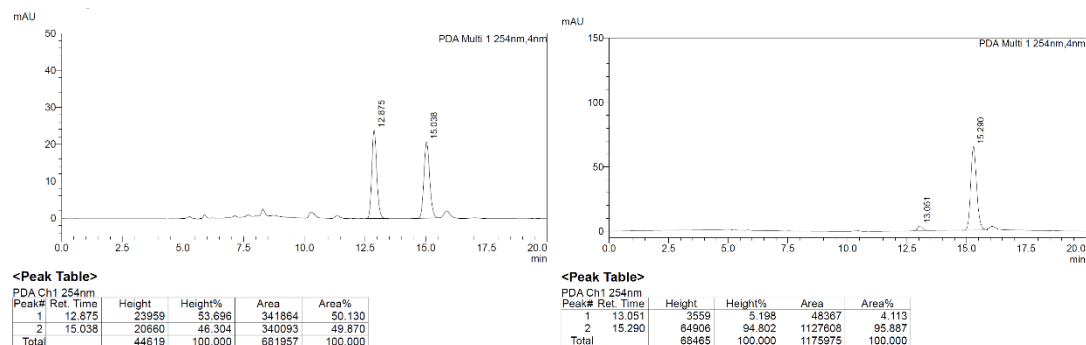

#### 4.2.2 Synthesis of (*S*)-2-cinnamyltetrahydrofuran (**8b**)

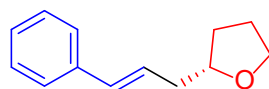

**8b**

Prepared according to typical procedure at 0 °C for 72 hours by using  $[\text{Pd}(\text{allyl})\text{Cl}]_2$  (2.5 mol%), **Xu9** (10 mol%) from  $\gamma$ -hydroxyalkenes (0.5 mmol) and alkenyl bromide (1 mmol), after flash column chromatography on a silica gel (petroleum ether: ethyl acetate = 50: 1) give the product **8b** as a white liquid (69 mg, 73% yield) with 92% ee.  $[\alpha]_D^{20} = 1.3$  ( $c = 0.4$ , Chloroform).  $^1\text{H}$  NMR (400 MHz, Chloroform- $d$ )  $\delta$  7.35 (d,  $J = 7.2$  Hz, 2H), 7.28 (t,  $J = 7.5$  Hz, 2H), 7.19 (t,  $J = 7.2$  Hz, 1H), 6.45 (d,  $J = 15.8$  Hz, 1H), 6.24 (dt,  $J = 15.8, 7.1$  Hz, 1H), 4.05 – 3.85 (m, 2H), 3.82 – 3.68 (m, 1H), 2.57 – 2.44 (m, 1H), 2.45 – 2.32 (m, 1H), 1.98 (tdd,  $J = 9.3, 7.7, 4.3$  Hz, 1H), 1.89 (ddd,  $J = 12.1, 7.9, 6.2$  Hz, 2H), 1.63 – 1.46 (m, 1H).  $^{13}\text{C}$  NMR (101 MHz, Chloroform- $d$ )  $\delta$  137.5, 131.9, 128.4, 127.0, 126.7, 126.0, 78.7, 67.9, 39.2, 30.8, 25.7. HRMS (ESI) calculated for  $[\text{C}_{13}\text{H}_{17}\text{O}]$   $[\text{M}+\text{H}]^+$ : 189.1274 found: 189.1278. Enantiomeric excess was determined by HPLC with a Chiralpak OD-H column (hexanes: 2-propanol = 95: 5, 0.6 mL/min, 254 nm); major enantiomer  $t_r = 12.572$  min, minor enantiomer  $t_r = 10.400$  min.

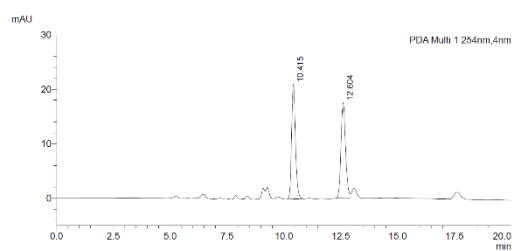

<Peak Table>  
PDA Ch1 254nm

| Peak# | Ret. Time | Height | Height% | Area   | Area%   |
|-------|-----------|--------|---------|--------|---------|
| 1     | 10.415    | 20994  | 54.535  | 247505 | 50.055  |
| 2     | 12.604    | 17503  | 45.465  | 246962 | 49.945  |
| Total |           | 38497  | 100.000 | 494468 | 100.000 |

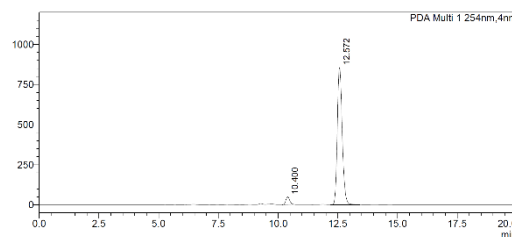

<Peak Table>  
PDA Ch1 254nm

| Peak# | Ret. Time | Height | Height% | Area     | Area%   |
|-------|-----------|--------|---------|----------|---------|
| 1     | 10.400    | 47743  | 5.284   | 529798   | 4.163   |
| 2     | 12.572    | 655751 | 94.716  | 12195728 | 95.837  |
| Total |           | 903495 | 100.000 | 12725526 | 100.000 |

### 4.2.3 Synthesis of (*S*, *E*)-2-(3-(*p*-tolyl)allyl)tetrahydrofuran (**8c**)

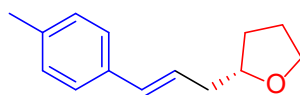

**8c**

Prepared according to typical procedure at 0 °C for 72 hours by using [Pd(allyl)Cl]<sub>2</sub> (2.5 mol%), **Xu9** (10 mol%) from  $\gamma$ -hydroxyalkenes (0.5 mmol) and alkenyl bromide (1 mmol), after flash column chromatography on a silica gel (petroleum ether: ethyl acetate = 50: 1) give the product **8c** as a white liquid (65 mg, 64% yield) with 92% ee.  $[\alpha]_D^{20} = -3.8$  ( $c = 0.4$ , Chloroform). <sup>1</sup>H NMR (400 MHz, Chloroform-*d*)  $\delta$  7.24 (d,  $J = 7.9$  Hz, 2H), 7.09 (d,  $J = 7.9$  Hz, 2H), 6.41 (d,  $J = 15.8$  Hz, 1H), 6.17 (dt,  $J = 15.8, 7.1$  Hz, 1H), 4.00 – 3.84 (m, 2H), 3.79 – 3.69 (m, 1H), 2.54 – 2.43 (m, 1H), 2.45 – 2.33 (m, 1H), 2.31 (s, 3H), 2.06 – 1.93 (m, 1H), 1.93 – 1.79 (m, 2H), 1.55 (dq,  $J = 11.7, 7.8$  Hz, 1H). <sup>13</sup>C NMR (100 MHz, Chloroform-*d*)  $\delta$  136.6, 134.7, 131.7, 129.1, 125.9, 125.6, 78.8, 67.9, 39.2, 30.7, 25.7, 21.0. HRMS (ESI) calculated for [C<sub>22</sub>H<sub>26</sub>NaO] [M+Na]<sup>+</sup>: 225.1250 found: 225.1245. Enantiomeric excess was determined by HPLC with a Chiralpak OD-H column (hexanes: 2-propanol = 95: 5, 0.6 mL/min, 254 nm); major enantiomer  $t_r = 13.659$  min, minor enantiomer  $t_r = 9.569$  min.

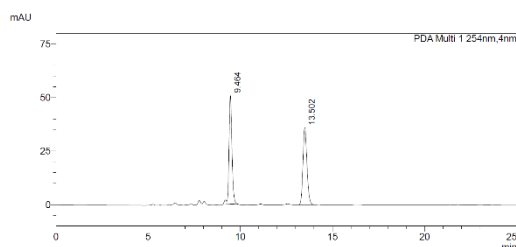

<Peak Table>  
PDA Ch1 254nm

| Peak# | Ret. Time | Height | Height% | Area    | Area%   |
|-------|-----------|--------|---------|---------|---------|
| 1     | 9.464     | 50684  | 58.462  | 550763  | 50.195  |
| 2     | 13.502    | 36011  | 41.538  | 546479  | 49.805  |
| Total |           | 86695  | 100.000 | 1097242 | 100.000 |

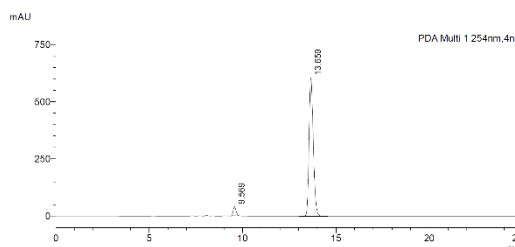

<Peak Table>  
PDA Ch1 254nm

| Peak# | Ret. Time | Height | Height% | Area     | Area%   |
|-------|-----------|--------|---------|----------|---------|
| 1     | 9.569     | 39713  | 6.153   | 410947   | 4.106   |
| 2     | 13.659    | 605713 | 93.847  | 9598708  | 95.894  |
| Total |           | 645425 | 100.000 | 10009655 | 100.000 |

### 4.2.4 Synthesis of (*S*, *E*)-2-(3-(4-isopropylphenyl)allyl)tetrahydrofuran (**8d**)

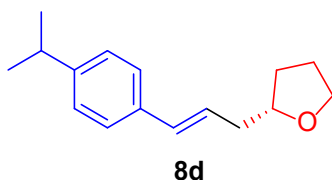

Prepared according to typical procedure at 0 °C for 72 hours by using [Pd(allyl)Cl]<sub>2</sub> (2.5 mol%), **Xu9** (10 mol%) from  $\gamma$ -hydroxyalkenes (0.5 mmol) and alkenyl bromide (1 mmol), after flash column chromatography on a silica gel (petroleum ether: ethyl acetate = 50: 1) give the product **8d** as a white liquid (62 mg, 54% yield) with 94% ee.  $[\alpha]_D^{20} = -5.9$  ( $c = 0.4$ , Chloroform). <sup>1</sup>H NMR (400 MHz, Chloroform-*d*)  $\delta$  7.29 (d,  $J = 8.0$  Hz, 2H), 7.15 (d,  $J = 8.0$  Hz, 2H), 6.42 (d,  $J = 15.8$  Hz, 1H), 6.18 (dt,  $J = 15.8, 7.1$  Hz, 1H), 4.01 – 3.82 (m, 2H), 3.82 – 3.67 (m, 1H), 2.87 (p,  $J = 6.9$  Hz, 1H), 2.58 – 2.42 (m, 1H), 2.43 – 2.32 (m, 1H), 2.02 – 1.77 (m, 3H), 1.61 – 1.47 (m, 1H), 1.23 (d,  $J = 6.9$  Hz, 6H). <sup>13</sup>C NMR (100 MHz, Chloroform-*d*)  $\delta$  147.8, 135.2, 131.8, 126.6, 126.1, 125.8, 78.9, 68.0, 39.3, 33.9, 30.8, 25.8, 24.0. HRMS (ESI) calculated for [C<sub>16</sub>H<sub>22</sub>NaO] [M+Na]<sup>+</sup>: 253.1563 found: 253.1565. Enantiomeric excess was determined by HPLC with a Chiralpak OD-H column (hexanes: 2-propanol = 95: 5, 0.6 mL/min, 254 nm); major enantiomer  $t_r = 9.225$  min, minor enantiomer  $t_r = 7.976$  min.

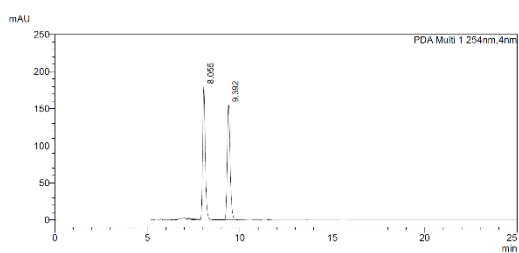

<Peak Table>  
PDA Ch1 254nm

| Peak# | Ret. Time | Height | Height% | Area    | Area%   |
|-------|-----------|--------|---------|---------|---------|
| 1     | 8.056     | 179306 | 53.561  | 1665650 | 49.220  |
| 2     | 9.382     | 155465 | 46.439  | 1718466 | 50.780  |
| Total |           | 334771 | 100.000 | 3384116 | 100.000 |

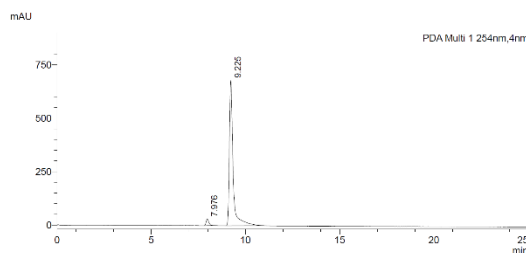

<Peak Table>  
PDA Ch1 254nm

| Peak# | Ret. Time | Height | Height% | Area    | Area%   |
|-------|-----------|--------|---------|---------|---------|
| 1     | 7.976     | 30472  | 4.290   | 307962  | 3.214   |
| 2     | 9.225     | 678661 | 95.710  | 9274605 | 96.786  |
| Total |           | 710333 | 100.000 | 9582567 | 100.000 |

#### 4.2.5 Synthesis of (*S,E*)-2-(3-(4-(tert-butyl)phenyl)allyl)tetrahydrofuran (**8e**)

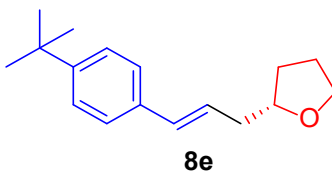

Prepared according to typical procedure at 0 °C for 72 hours by using [Pd(allyl)Cl]<sub>2</sub> (2.5 mol%), **Xu9** (10 mol%) from  $\gamma$ -hydroxyalkenes (0.5 mmol) and alkenyl bromide (1 mmol), after flash column chromatography on a silica gel (petroleum ether: ethyl acetate = 50: 1) give the product **8e** as a white liquid (82 mg, 67% yield) with 93% ee.  $[\alpha]_D^{20} = -7.5$  ( $c = 0.4$ , Chloroform). <sup>1</sup>H NMR (400 MHz, Chloroform-*d*)  $\delta$  7.36 – 7.23 (m, 4H), 6.43 (d,  $J = 15.8$  Hz, 1H), 6.19 (dt,  $J = 15.7, 7.1$  Hz,

1H), 4.03 – 3.82 (m, 2H), 3.73 (td,  $J = 7.9, 6.6$  Hz, 1H), 2.56 – 2.31 (m, 2H), 2.02 – 1.77 (m, 3H), 1.62 – 1.48 (m, 1H), 1.30 (s, 9H).  $^{13}\text{C}$  NMR (100 MHz, Chloroform- $d$ )  $\delta$  150.1, 134.8, 131.7, 125.9, 125.8, 125.4, 78.9, 68.0, 39.3, 34.6, 31.4, 30.8, 25.8. HRMS (ESI) calculated for  $[\text{C}_{17}\text{H}_{24}\text{NaO}]$   $[\text{M}+\text{Na}]^+$ : 267.1719 found: 267.1726. Enantiomeric excess was determined by HPLC with a Chiralpak OD-H column (hexanes: 2-propanol = 95: 5, 0.6 mL/min, 254 nm); major enantiomer  $t_r = 7.851$  min, minor enantiomer  $t_r = 7.371$  min..

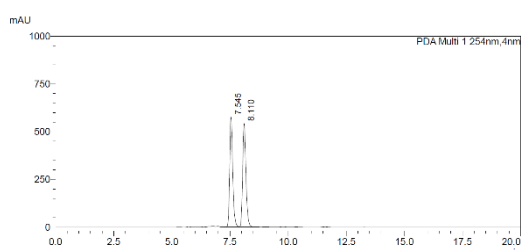

| <Peak Table>  |           |         |         |          |
|---------------|-----------|---------|---------|----------|
| PDA Ch1 254nm |           |         |         |          |
| Peak#         | Ret. Time | Height  | Height% | Area     |
| 1             | 7.545     | 575694  | 51.498  | 5301871  |
| 2             | 8.110     | 542194  | 48.502  | 5301814  |
| Total         |           | 1117888 | 100.000 | 10603685 |

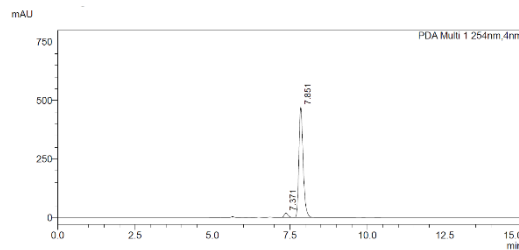

| <Peak Table>  |           |        |         |         |
|---------------|-----------|--------|---------|---------|
| PDA Ch1 254nm |           |        |         |         |
| Peak#         | Ret. Time | Height | Height% | Area    |
| 1             | 7.371     | 19870  | 3.951   | 165540  |
| 2             | 7.851     | 471087 | 96.149  | 4475553 |
| Total         |           | 489957 | 100.000 | 4641092 |

#### 4.2.6 Synthesis of (*S, E*)-2-(3-((1,1'-biphenyl)-4-yl)allyl)tetrahydrofuran (**8f**)

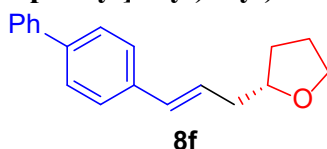

Prepared according to typical procedure at 0 °C for 72 hours by using  $[\text{Pd}(\text{allyl})\text{Cl}]_2$  (2.5 mol%), **Xu9** (10 mol%) from  $\gamma$ -hydroxyalkenes (0.5 mmol) and alkenyl bromide (1 mmol), after flash column chromatography on a silica gel (petroleum ether: ethyl acetate = 50: 1) give the product **8f** as a white solid (70 mg, 53% yield) with 92% ee. Mp: 79.5 – 83.1 °C.  $[\alpha]_D^{20} = 0.9$  ( $c = 0.4$ , Chloroform).  $^1\text{H}$  NMR (400 MHz, Chloroform- $d$ )  $\delta$  7.62 – 7.55 (m, 2H), 7.55 – 7.49 (m, 2H), 7.41 (dt,  $J = 7.8, 3.6$  Hz, 4H), 7.36 – 7.26 (m, 1H), 6.54 – 6.43 (m, 1H), 6.28 (dt,  $J = 15.8, 7.1$  Hz, 1H), 4.04 – 3.84 (m, 2H), 3.74 (td,  $J = 7.8, 6.3$  Hz, 1H), 2.51 (dtd,  $J = 14.8, 6.6, 1.4$  Hz, 1H), 2.46 – 2.36 (m, 1H), 1.98 (dddd,  $J = 11.3, 8.3, 6.3, 4.8$  Hz, 1H), 1.92 – 1.81 (m, 2H), 1.56 (ddt,  $J = 11.5, 8.4, 7.4$  Hz, 1H).  $^{13}\text{C}$  NMR (100 MHz, Chloroform- $d$ )  $\delta$  140.8, 139.8, 136.7, 131.5, 128.8, 127.2, 127.2, 127.0, 126.9, 126.6, 78.8, 68.1, 39.4, 30.9, 25.8. HRMS (ESI) calculated for  $[\text{C}_{19}\text{H}_{20}\text{NaO}]$   $[\text{M}+\text{Na}]^+$ : 287.1406 found: 287.1401. Enantiomeric excess was determined by HPLC with a Chiralpak OD-H column (hexanes: 2-propanol = 95: 5, 0.6 mL/min, 254 nm); major enantiomer  $t_r = 12.804$  min, minor enantiomer  $t_r = 11.448$  min.

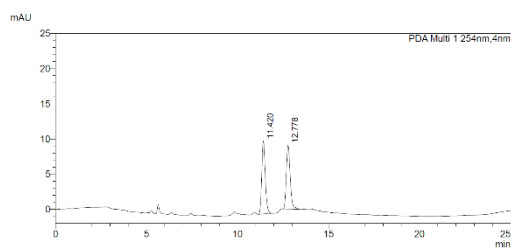

<Peak Table>

| Peak# | Ret. Time | Height | Height% | Area   | Area%   |
|-------|-----------|--------|---------|--------|---------|
| 1     | 11.420    | 10350  | 53.281  | 137788 | 50.737  |
| 2     | 12.778    | 9076   | 46.719  | 133784 | 49.263  |
| Total |           | 19426  | 100.000 | 271573 | 100.000 |

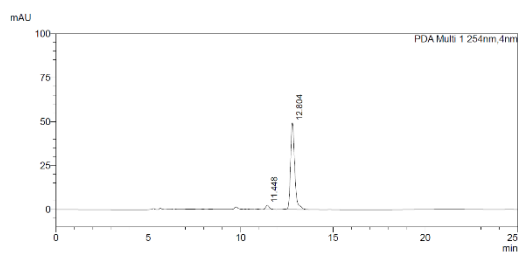

<Peak Table>

| Peak# | Ret. Time | Height | Height% | Area   | Area%   |
|-------|-----------|--------|---------|--------|---------|
| 1     | 11.448    | 2358   | 4.573   | 30827  | 3.872   |
| 2     | 12.804    | 48212  | 95.427  | 765287 | 96.128  |
| Total |           | 51570  | 100.000 | 796114 | 100.000 |

#### 4.2.7 Synthesis of (*S, E*)-2-(3-(2,4-dimethylphenyl)allyl)tetrahydrofuran (**8g**)

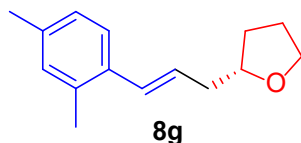

Prepared according to typical procedure at 0 °C for 72 hours by using [Pd(allyl)Cl]<sub>2</sub> (2.5 mol%), **Xu9** (10 mol%) from  $\gamma$ -hydroxyalkenes (0.5 mmol) and alkenyl bromide (1 mmol), after flash column chromatography on a silica gel (petroleum ether: ethyl acetate = 50: 1) give the product **8g** as a white liquid (62 mg, 57% yield) with 93% ee.  $[\alpha]_D^{20} = -7.6$  ( $c = 0.4$ , Chloroform). <sup>1</sup>H NMR (400 MHz, Chloroform-*d*)  $\delta$  7.32 (d,  $J = 7.6$  Hz, 1H), 6.94 (d,  $J = 7.7$  Hz, 2H), 6.61 (d,  $J = 15.7$  Hz, 1H), 6.05 (dt,  $J = 15.7, 7.2$  Hz, 1H), 4.02 – 3.83 (m, 2H), 3.74 (td,  $J = 7.9, 6.5$  Hz, 1H), 2.52 (dddd,  $J = 13.2, 7.2, 5.9, 1.4$  Hz, 1H), 2.46 – 2.35 (m, 1H), 2.29 (d,  $J = 5.1$  Hz, 6H), 2.08 – 1.82 (m, 3H), 1.63 – 1.47 (m, 1H). <sup>13</sup>C NMR (100 MHz, Chloroform-*d*)  $\delta$  136.5, 134.7, 133.7, 130.8, 129.5, 127.0, 126.6, 125.3, 78.8, 67.9, 39.4, 30.7, 25.7, 21.0, 19.7. HRMS (ESI) calculated for [C<sub>15</sub>H<sub>20</sub>NaO] [M+Na]<sup>+</sup>: 239.1406 found: 239.1409. Enantiomeric excess was determined by HPLC with a Chiralpak OD-H column (hexanes: 2-propanol = 95: 5, 0.6 mL/min, 254 nm); major enantiomer  $t_r = 20.085$  min, minor enantiomer  $t_r = 10.095$  min.

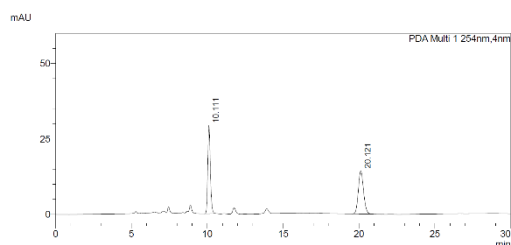

<Peak Table>

| Peak# | Ret. Time | Height | Height% | Area   | Area%   |
|-------|-----------|--------|---------|--------|---------|
| 1     | 10.111    | 29278  | 67.233  | 340671 | 49.942  |
| 2     | 20.121    | 14289  | 32.767  | 341459 | 50.058  |
| Total |           | 43567  | 100.000 | 682129 | 100.000 |

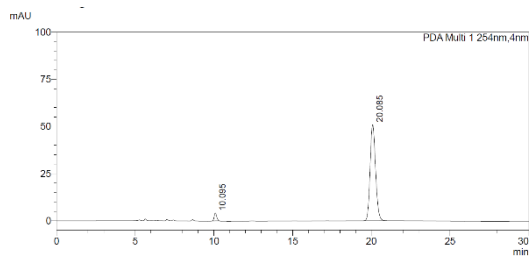

<Peak Table>

| Peak# | Ret. Time | Height | Height% | Area    | Area%   |
|-------|-----------|--------|---------|---------|---------|
| 1     | 10.095    | 4190   | 7.603   | 45663   | 3.610   |
| 2     | 20.085    | 50923  | 92.397  | 1219312 | 96.390  |
| Total |           | 55113  | 100.000 | 1264975 | 100.000 |

#### 4.2.8 Synthesis of (*S, E*)-2-(3-(4-(benzyloxy)phenyl)allyl)tetrahydrofuran (**8h**)

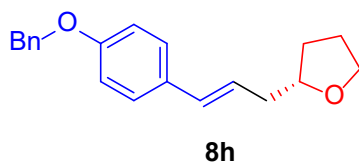

Prepared according to typical procedure at 0 °C for 72 hours by using [Pd(allyl)Cl]<sub>2</sub> (2.5 mol%), **Xu9** (10 mol%) from  $\gamma$ -hydroxyalkenes (0.5 mmol) and alkenyl bromide (1 mmol), after flash column chromatography on a silica gel (petroleum ether: ethyl acetate = 50: 1) give the product **8h** as a white solid (83 mg, 56% yield) with 91% ee. Mp: 40.0 – 41.5 °C.  $[\alpha]_D^{20} = -2.4$  ( $c = 0.4$ , Chloroform). <sup>1</sup>H NMR (400 MHz, Chloroform-*d*)  $\delta$  7.44 – 7.24 (m, 7H), 6.89 (d,  $J = 8.5$  Hz, 2H), 6.39 (d,  $J = 15.8$  Hz, 1H), 6.09 (dt,  $J = 15.6, 7.1$  Hz, 1H), 5.03 (s, 2H), 3.99 – 3.83 (m, 2H), 3.81 – 3.67 (m, 1H), 2.52 – 2.42 (m, 1H), 2.42 – 2.31 (m, 1H), 2.04 – 1.80 (m, 3H), 1.54 (dq,  $J = 11.7, 7.8$  Hz, 1H). <sup>13</sup>C NMR (100 MHz, Chloroform-*d*)  $\delta$  158.0, 137.0, 131.3, 130.7, 128.6, 128.0, 127.5, 127.2, 124.7, 114.9, 79.0, 70.0, 68.0, 39.3, 30.9, 25.8. HRMS (ESI) calculated for [C<sub>20</sub>H<sub>22</sub>NaO<sub>2</sub>] [M+Na]<sup>+</sup>: 317.1512 found: 317.1509. Enantiomeric excess was determined by HPLC with a Chiralpak OD-H column (hexanes: 2-propanol = 95: 5, 0.6 mL/min, 254 nm); major enantiomer tr = 21.576 min, minor enantiomer tr = 17.993 min.

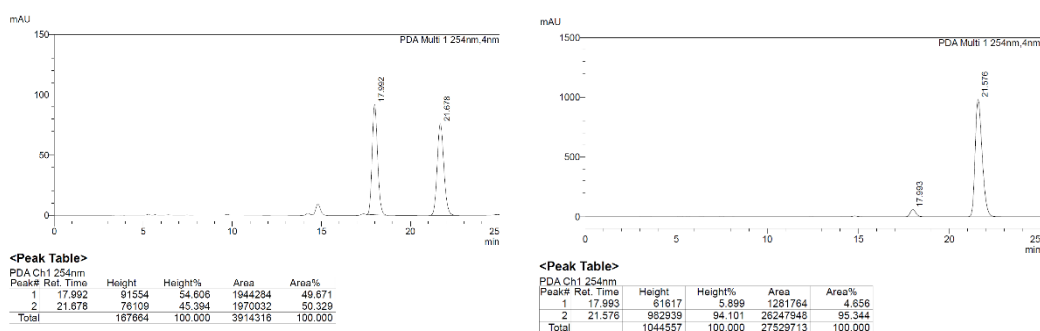

#### 4.2.9 Synthesis of (*S,E*)-2-(3-(2-methoxyphenyl)allyl)tetrahydrofuran (**8i**)

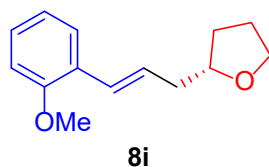

Prepared according to typical procedure at 0 °C for 72 hours by using [Pd(allyl)Cl]<sub>2</sub> (2.5 mol%), **Xu9** (10 mol%) from  $\gamma$ -hydroxyalkenes (0.5 mmol) and alkenyl bromide (1 mmol), after flash column chromatography on a silica gel (petroleum ether: ethyl acetate = 50: 1) give the product **8i** as a white liquid (70 mg, 64% yield) with 92% ee.  $[\alpha]_D^{20} = -4.5$  ( $c = 0.4$ , Chloroform). <sup>1</sup>H NMR (400 MHz, Chloroform-*d*)  $\delta$  7.43 (dd,  $J = 7.6, 1.7$  Hz, 1H), 7.18 (ddd,  $J = 8.1, 7.4, 1.7$  Hz, 1H), 6.90 (td,

$J = 7.5, 1.0$  Hz, 1H), 6.84 (dd,  $J = 8.2, 1.0$  Hz, 1H), 6.78 (dd,  $J = 16.0, 1.6$  Hz, 1H), 6.22 (dt,  $J = 15.9, 7.2$  Hz, 1H), 4.01 – 3.86 (m, 2H), 3.83 (s, 3H), 3.74 (td,  $J = 7.9, 6.4$  Hz, 1H), 2.53 (dddd,  $J = 14.6, 7.3, 6.1, 1.5$  Hz, 1H), 2.41 (dddd,  $J = 13.9, 7.5, 6.5, 1.5$  Hz, 1H), 2.07 – 1.79 (m, 3H), 1.63 – 1.54 (m, 1H).  $^{13}\text{C}$  NMR (100 MHz, Chloroform- $d$ )  $\delta$  156.3, 128.1, 127.4, 126.6, 126.5, 120.6, 110.7, 79.0, 68.0, 55.5, 39.7, 30.8, 25.8. HRMS (ESI) calculated for  $[\text{C}_{14}\text{H}_{18}\text{NaO}_2]$   $[\text{M}+\text{Na}]^+$ : 241.1199 found: 241.1205. Enantiomeric excess was determined by HPLC with a Chiralpak ODH column (hexanes: 2-propanol = 95: 5, 0.6 mL/min, 254 nm); major enantiomer  $t_r = 26.598$  min, minor enantiomer  $t_r = 21.757$  min.

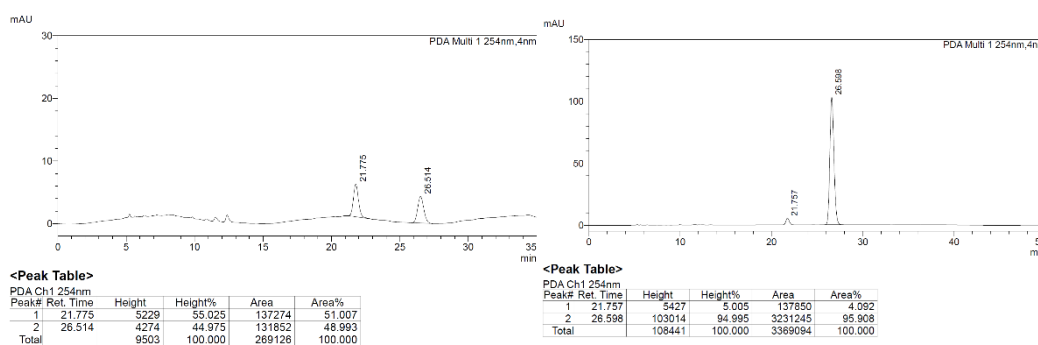

#### 4.2.10 Synthesis of (*S,E*)-5-(3-(tetrahydrofuran-2-yl)prop-1-en-1-yl)benzo[d][1,3]dioxole (**8j**)

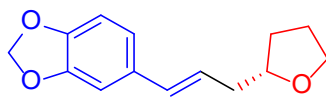

**8j**

Prepared according to typical procedure at 0 °C for 72 hours by using  $[\text{Pd}(\text{allyl})\text{Cl}]_2$  (2.5 mol%), **Xu9** (10 mol%) from  $\gamma$ -hydroxyalkenes (0.5 mmol) and alkenyl bromide (1 mmol), after flash column chromatography on a silica gel (petroleum ether: ethyl acetate = 50: 1) give the product **8j** as a white liquid (54 mg, 56% yield) with 94% ee.  $[\alpha]_D^{20} = 0.1$  ( $c = 0.4$ , Chloroform).  $^1\text{H}$  NMR (400 MHz, Chloroform- $d$ )  $\delta$  6.90 (d,  $J = 1.7$  Hz, 1H), 6.82 – 6.67 (m, 2H), 6.35 (dt,  $J = 15.8, 1.4$  Hz, 1H), 6.13 – 5.99 (m, 1H), 5.92 (s, 2H), 4.00 – 3.83 (m, 2H), 3.74 (td,  $J = 7.9, 6.5$  Hz, 1H), 2.53 – 2.30 (m, 2H), 2.04 – 1.78 (m, 3H), 1.54 (ddt,  $J = 11.7, 8.4, 7.4$  Hz, 1H).  $^{13}\text{C}$  NMR (100 MHz, Chloroform- $d$ )  $\delta$  147.8, 146.6, 132.0, 131.4, 124.9, 120.4, 108.1, 105.4, 100.9, 78.8, 67.9, 39.0, 30.8, 25.7. HRMS (ESI) calculated for  $[\text{C}_{14}\text{H}_{16}\text{NaO}_3]$   $[\text{M}+\text{Na}]^+$ : 255.0992 found: 255.0989. Enantiomeric excess was determined by HPLC with a Chiralpak OD-H column (hexanes: 2-propanol = 95: 5, 0.6 mL/min, 254 nm); major enantiomer  $t_r = 12.594$  min, minor enantiomer  $t_r = 11.869$  min.



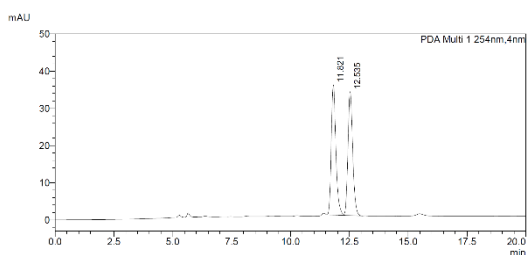

<Peak Table>

| Peak# | Ret. Time | Height | Height% | Area   | Area%   |
|-------|-----------|--------|---------|--------|---------|
| 1     | 11.821    | 35024  | 51.244  | 473897 | 50.156  |
| 2     | 12.535    | 33324  | 48.756  | 470946 | 49.844  |
| Total |           | 68348  | 100.000 | 944843 | 100.000 |

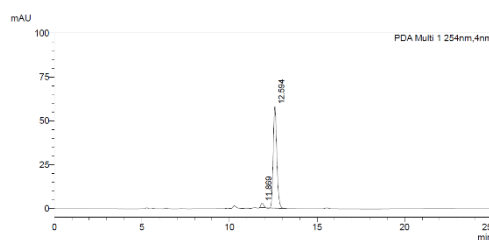

<Peak Table>

| Peak# | Ret. Time | Height | Height% | Area   | Area%   |
|-------|-----------|--------|---------|--------|---------|
| 1     | 11.869    | 2512   | 4.152   | 27651  | 3.247   |
| 2     | 12.694    | 57695  | 95.848  | 823913 | 96.753  |
| Total |           | 60508  | 100.000 | 851564 | 100.000 |

#### 4.2.11 Synthesis of (*S, E*)-2-(3-(3,4-dimethoxyphenyl)allyl)tetrahydrofuran (**8k**)

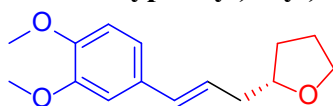

**8k**

Prepared according to typical procedure at 0 °C for 72 hours by using [Pd(allyl)Cl]<sub>2</sub> (2.5 mol%), **Xu9** (10 mol%) from  $\gamma$ -hydroxyalkenes (0.5 mmol) and alkenyl bromide (1 mmol), after flash column chromatography on a silica gel (petroleum ether: ethyl acetate = 50: 1) give the product **8k** as a white liquid (54 mg, 44% yield) with 91% ee.  $[\alpha]_D^{20} = 1.9$  ( $c = 0.4$ , Chloroform). <sup>1</sup>H NMR (400 MHz, Chloroform-*d*)  $\delta$  6.93 (d,  $J = 2.0$  Hz, 1H), 6.88 (dd,  $J = 8.3, 2.0$  Hz, 1H), 6.79 (d,  $J = 8.2$  Hz, 1H), 6.39 (dt,  $J = 15.9, 1.4$  Hz, 1H), 6.11 (dt,  $J = 15.8, 7.2$  Hz, 1H), 3.99 – 3.90 (m, 2H), 3.89 (s, 3H), 3.86 (s, 3H), 3.75 (td,  $J = 7.9, 6.4$  Hz, 1H), 2.55 – 2.30 (m, 2H), 2.00 (dddd,  $J = 11.3, 8.4, 6.3, 4.9$  Hz, 1H), 1.95 – 1.84 (m, 2H), 1.57 (ddt,  $J = 11.6, 8.4, 7.4$  Hz, 1H). <sup>13</sup>C NMR (100 MHz, Chloroform-*d*)  $\delta$  148.9, 148.4, 131.5, 130.7, 124.9, 119.1, 111.1, 108.5, 78.9, 68.0, 55.9, 55.8, 39.21, 30.9, 25.7. HRMS (ESI) calculated for [C<sub>15</sub>H<sub>20</sub>NaO<sub>3</sub>] [M+Na]<sup>+</sup>: 271.1305 found: 271.1313. Enantiomeric excess was determined by HPLC with a Chiralpak OD-H column (hexanes: 2-propanol = 95: 5, 0.6 mL/min, 254 nm); major enantiomer  $t_r = 21.788$  min, minor enantiomer  $t_r = 19.809$  min.

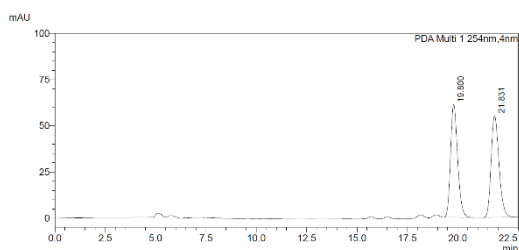

<Peak Table>

| Peak# | Ret. Time | Height | Height% | Area    | Area%   |
|-------|-----------|--------|---------|---------|---------|
| 1     | 19.800    | 61010  | 52.511  | 1490991 | 49.757  |
| 2     | 21.831    | 55174  | 47.489  | 1505550 | 50.243  |
| Total |           | 116184 | 100.000 | 2996542 | 100.000 |

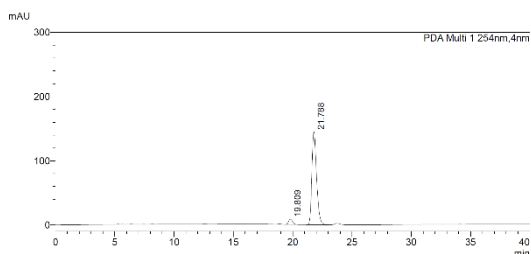

<Peak Table>

| Peak# | Ret. Time | Height | Height% | Area    | Area%   |
|-------|-----------|--------|---------|---------|---------|
| 1     | 19.809    | 8113   | 5.302   | 191973  | 4.536   |
| 2     | 21.788    | 144910 | 94.698  | 4040662 | 95.464  |
| Total |           | 153023 | 100.000 | 4232635 | 100.000 |

#### 4.2.12 Synthesis of (*S, E*)-2-(3-(3,4,5-trimethoxyphenyl)allyl)tetrahydrofuran (**8l**)

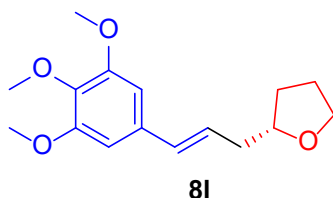

Prepared according to typical procedure at 0 °C for 72 hours by using [Pd(allyl)Cl]<sub>2</sub> (2.5 mol%), **Xu9** (10 mol%) from  $\gamma$ -hydroxyalkenes (0.5 mmol) and alkenyl bromide (1 mmol), after flash column chromatography on a silica gel (petroleum ether: ethyl acetate = 50: 1) give the product **8l** as a white liquid (52 mg, 37% yield) with 92% ee.  $[\alpha]_D^{20} = 3.6$  ( $c = 0.4$ , Chloroform). <sup>1</sup>H NMR (400 MHz, Chloroform-*d*)  $\delta$  6.59 (s, 2H), 6.38 (dt,  $J = 15.8, 1.4$  Hz, 1H), 6.17 (dt,  $J = 15.8, 7.1$  Hz, 1H), 4.00 – 3.89 (m, 2H), 3.87 (s, 6H), 3.83 (s, 3H), 3.76 (td,  $J = 7.9, 6.4$  Hz, 1H), 2.56 – 2.31 (m, 2H), 2.07 – 1.82 (m, 3H), 1.57 (ddt,  $J = 11.7, 8.5, 7.5$  Hz, 1H). <sup>13</sup>C NMR (100 MHz, Chloroform-*d*)  $\delta$  153.2, 137.4, 133.4, 131.8, 126.4, 103.1, 78.8, 68.0, 60.9, 56.0, 39.2, 30.9, 25.7. HRMS (ESI) calculated for [C<sub>16</sub>H<sub>22</sub>NaO<sub>4</sub>] [M+Na]<sup>+</sup>: 301.1410 found: 301.1415. Enantiomeric excess was determined by HPLC with a Chiralpak OD-H column (hexanes: 2-propanol = 95: 5, 0.6 mL/min, 254 nm); major enantiomer  $t_r = 21.027$  min, minor enantiomer  $t_r = 19.968$  min.

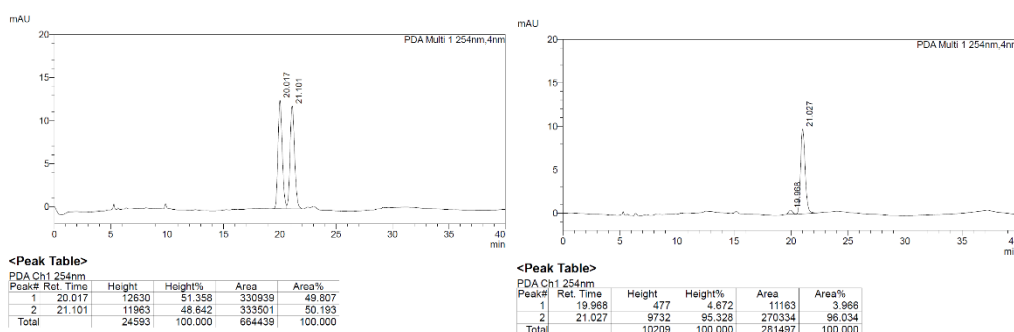

#### 4.2.13 Synthesis of (*S,E*)-*N,N*-dimethyl-4-(3-(tetrahydrofuran-2-yl)prop-1-en-1-yl)aniline (**8m**)

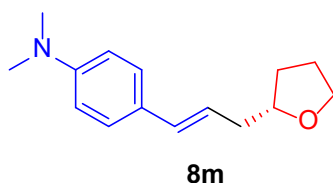

Prepared according to typical procedure at 0 °C for 72 hours by using [Pd(allyl)Cl]<sub>2</sub> (2.5 mol%), **Xu9** (10 mol%) from  $\gamma$ -hydroxyalkenes (0.5 mmol) and alkenyl bromide (1 mmol), after flash column chromatography on a silica gel (petroleum ether: ethyl acetate = 50: 1) give the product **8m** as a white liquid (60 mg, 52% yield) with 91% ee.  $[\alpha]_D^{20} = -6.7$  ( $c = 0.4$ , Chloroform). <sup>1</sup>H NMR (400 MHz, Chloroform-*d*)  $\delta$  7.31 – 7.16 (m, 2H), 6.76 – 6.60 (m, 2H), 6.42 – 6.29 (m, 1H), 6.01 (dt,

$J = 15.8, 7.2$  Hz, 1H), 4.07 – 3.80 (m, 2H), 3.73 (td,  $J = 7.9, 6.4$  Hz, 1H), 2.92 (s, 6H), 2.47 (dddd,  $J = 14.5, 7.3, 6.0, 1.5$  Hz, 1H), 2.35 (dddd,  $J = 13.9, 7.6, 6.5, 1.4$  Hz, 1H), 2.03 – 1.93 (m, 1H), 1.93 – 1.78 (m, 2H), 1.55 (ddt,  $J = 11.7, 8.6, 7.5$  Hz, 1H).  $^{13}\text{C}$  NMR (100 MHz, Chloroform- $d$ )  $\delta$  149.8, 131.8, 127.0, 126.4, 122.4, 112.6, 79.2, 68.0, 40.6, 39.3, 30.8, 25.8. HRMS (ESI) calculated for  $[\text{C}_{15}\text{H}_{22}\text{NO}]$   $[\text{M}+\text{Na}]^+$ : 232.1696 found: 232.1698. Enantiomeric excess was determined by HPLC with a Chiralpak OD-H column (hexanes: 2-propanol = 95: 5, 0.6 mL/min, 254 nm); major enantiomer  $t_r = 17.316$  min, minor enantiomer  $t_r = 14.020$  min. (Note: The mixture of **8m** and *ent*-**8m** with different concentration to gain the HPLC time, all HPLC time difference are less than one minute.)

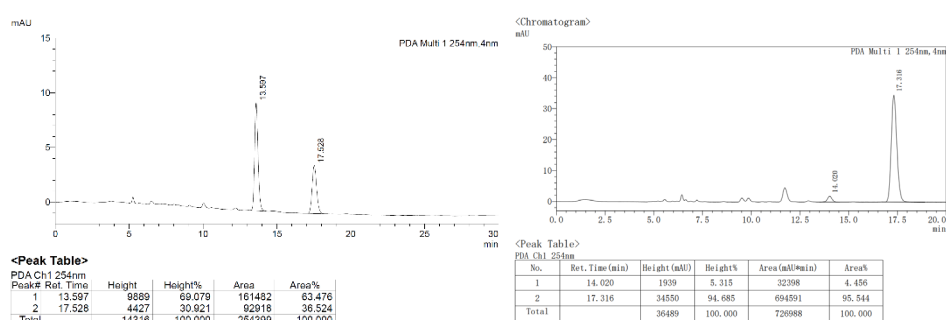

#### 4.2.14 Synthesis of (*S, E*)-2-(3-(4-(trifluoromethoxy)phenyl)allyl)tetrahydrofuran (**8n**)

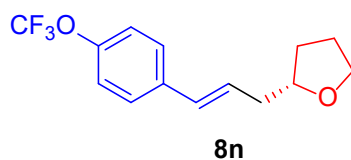

Prepared according to typical procedure at 0 °C for 72 hours by using  $[\text{Pd}(\text{allyl})\text{Cl}]_2$  (2.5 mol%), **Xu9** (10 mol%) from  $\gamma$ -hydroxyalkenes (0.5 mmol) and alkenyl bromide (1 mmol), after flash column chromatography on a silica gel (petroleum ether: ethyl acetate = 50: 1) give the product **8n** as a white liquid (67 mg, 49% yield) with 92% ee.  $[\alpha]_D^{20} = 4.1$  ( $c = 0.4$ , Chloroform).  $^1\text{H}$  NMR (400 MHz, Chloroform- $d$ )  $\delta$  7.39 – 7.31 (m, 2H), 7.13 (d,  $J = 8.3$  Hz, 2H), 6.44 (d,  $J = 15.9$  Hz, 1H), 6.23 (dt,  $J = 15.8, 7.1$  Hz, 1H), 4.02 – 3.83 (m, 2H), 3.82 – 3.68 (m, 1H), 2.53 – 2.32 (m, 2H), 1.95 (dddd,  $J = 36.0, 14.7, 7.2, 4.4$  Hz, 3H), 1.55 (dq,  $J = 11.6, 7.8$  Hz, 1H).  $^{13}\text{C}$  NMR (100 MHz, Chloroform- $d$ )  $\delta$  148.1 (d,  $J = 1.9$  Hz), 136.4, 130.5, 128.1, 127.2, 121.0, 120.5 (d,  $J = 256.8$  Hz), 78.6, 68.0, 39.2, 30.9, 25.7.  $^{19}\text{F}$  NMR (376 MHz, Chloroform- $d$ )  $\delta$  -57.91. HRMS (ESI) calculated for  $[\text{C}_{14}\text{H}_{15}\text{F}_3\text{NaO}_2]$   $[\text{M}+\text{Na}]^+$ : 295.0916 found: 295.0909. Enantiomeric excess was determined by

HPLC with a Chiralpak AD-H column (hexanes: 2-propanol = 99: 1, 0.6 mL/min, 254nm); major enantiomer  $t_r$  = 10.873 min, minor enantiomer  $t_r$  = 10.042 min.

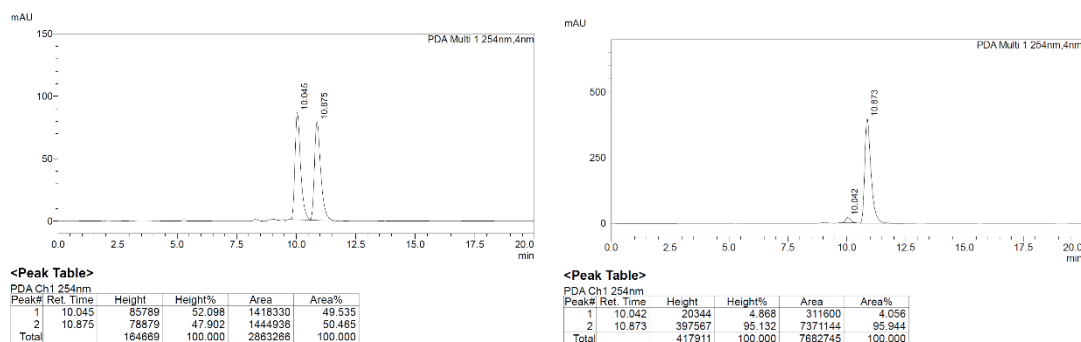

#### 4.2.15 Synthesis of (*S, E*)-2-(3-(4-fluorophenyl)allyl)tetrahydrofuran (**8o**)

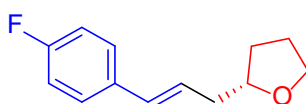

**8o**

Prepared according to typical procedure at 0 °C for 72 hours by using [Pd(allyl)Cl]<sub>2</sub> (2.5 mol%), **Xu9** (10 mol%) from  $\gamma$ -hydroxyalkenes (0.5 mmol) and alkenyl bromide (1 mmol), after flash column chromatography on a silica gel (petroleum ether: ethyl acetate = 50: 1) give the product **8o** as a white liquid (52 mg, 50% yield) with 91% ee.  $[\alpha]_D^{20}$  = 3.3 ( $c$  = 0.4, Chloroform). <sup>1</sup>H NMR (400 MHz, Chloroform-*d*)  $\delta$  7.35 – 7.27 (m, 2H), 7.07 – 6.91 (m, 2H), 6.48 – 6.35 (m, 1H), 6.15 (dt,  $J$  = 15.8, 7.1 Hz, 1H), 4.06 – 3.84 (m, 2H), 3.75 (td,  $J$  = 7.9, 6.4 Hz, 1H), 2.55 – 2.24 (m, 2H), 2.00 (dddd,  $J$  = 11.3, 8.4, 6.3, 4.9 Hz, 1H), 1.96 – 1.80 (m, 2H), 1.56 (ddt,  $J$  = 11.6, 8.4, 7.4 Hz, 1H). <sup>13</sup>C NMR (100 MHz, Chloroform-*d*)  $\delta$  162.0 (d,  $J$  = 245.8 Hz), 133.7 (d,  $J$  = 3.3 Hz), 130.7, 127.5 (d,  $J$  = 7.8 Hz), 126.6 (d,  $J$  = 2.3 Hz), 115.3 (d,  $J$  = 21.5 Hz), 78.8, 68.0, 39.2, 30.9, 25.7. <sup>19</sup>F NMR (376 MHz, Chloroform-*d*)  $\delta$  -115.44. HRMS (ESI) calculated for [C<sub>13</sub>H<sub>15</sub>FN<sub>1</sub>O] [M+Na]<sup>+</sup>: 229.0999 found: 229.0999. Enantiomeric excess was determined by HPLC with a Chiralpak AD-H column (hexanes: 2-propanol = 99: 1, 0.6 mL/min, 254 nm); major enantiomer  $t_r$  = 12.318 min, minor enantiomer  $t_r$  = 11.652 min.

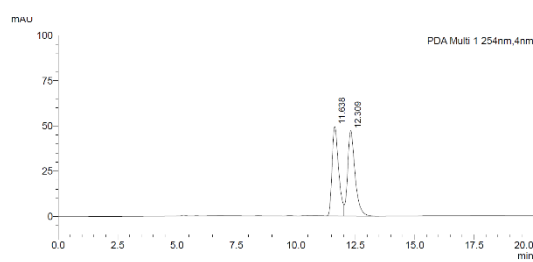

<Peak Table>

| Peak# | Ret. Time | Height | Height% | Area    | Area%   |
|-------|-----------|--------|---------|---------|---------|
| 1     | 11.038    | 49440  | 51.142  | 952266  | 48.197  |
| 2     | 12.309    | 47232  | 48.858  | 1023516 | 51.803  |
| Total |           | 96672  | 100.000 | 1975782 | 100.000 |

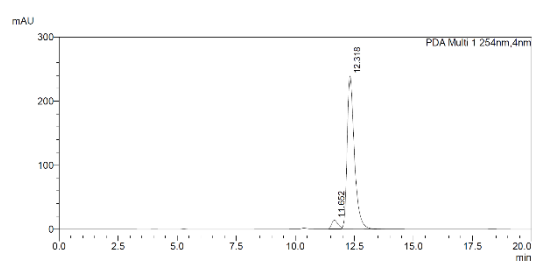

<Peak Table>

| Peak# | Ret. Time | Height | Height% | Area    | Area%   |
|-------|-----------|--------|---------|---------|---------|
| 1     | 11.052    | 13674  | 5.412   | 249482  | 4.684   |
| 2     | 12.318    | 238961 | 94.588  | 5076298 | 95.316  |
| Total |           | 252635 | 100.000 | 5325758 | 100.000 |

#### 4.2.16 Synthesis of (*S, E*)-2-(3-(4-(trifluoromethyl)phenyl)allyl)tetrahydrofuran (**8p**)

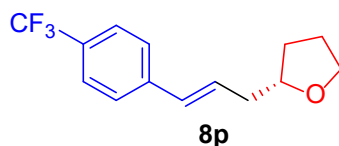

Prepared according to typical procedure at 0 °C for 72 hours by using [Pd(allyl)Cl]<sub>2</sub> (2.5 mol%), **Xu9** (10 mol%) from  $\gamma$ -hydroxyalkenes (0.5 mmol) and alkenyl bromide (1 mmol), after flash column chromatography on a silica gel (petroleum ether: ethyl acetate = 50: 1) give the product **8p** as a white liquid (74 mg, 58% yield) with 91% ee.  $[\alpha]_D^{20}$  = 3.4 ( $c$  = 0.4, Chloroform). <sup>1</sup>H NMR (400 MHz, Chloroform-*d*)  $\delta$  7.35 (d,  $J$  = 8.7 Hz, 2H), 7.19 – 7.07 (m, 2H), 6.44 (dd,  $J$  = 16.0, 1.6 Hz, 1H), 6.23 (dt,  $J$  = 15.9, 7.1 Hz, 1H), 4.05 – 3.85 (m, 2H), 3.75 (td,  $J$  = 7.8, 6.4 Hz, 1H), 2.54 – 2.34 (m, 2H), 2.07 – 1.80 (m, 3H), 1.62 – 1.44 (m, 1H). <sup>13</sup>C NMR (100 MHz, Chloroform-*d*)  $\delta$  148.13, 148.11, 136.38, 130.47, 128.06, 127.22, 121.77, 120.97, 119.21, 78.64, 67.98, 39.14, 30.91, 25.70. <sup>19</sup>F NMR (376 MHz, CDC13)  $\delta$  -57.92. HRMS (ESI) calculated for [C<sub>14</sub>H<sub>16</sub>F<sub>3</sub>O] [M+H]<sup>+</sup>: 257.1148 found: 257.1145. Enantiomeric excess was determined by HPLC with a Chiralpak AD-H column (hexanes: 2-propanol = 99: 1, 0.6 mL/min, 254 nm); major enantiomer  $t_r$  = 10.956 min, minor enantiomer  $t_r$  = 10.078 min.

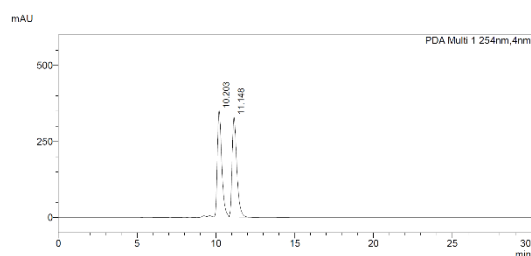

<Peak Table>

| Peak# | Ret. Time | Height | Height% | Area     | Area%   |
|-------|-----------|--------|---------|----------|---------|
| 1     | 10.203    | 349182 | 51.530  | 6748061  | 49.813  |
| 2     | 11.148    | 328451 | 48.470  | 6798604  | 50.187  |
| Total |           | 677633 | 100.000 | 13546665 | 100.000 |

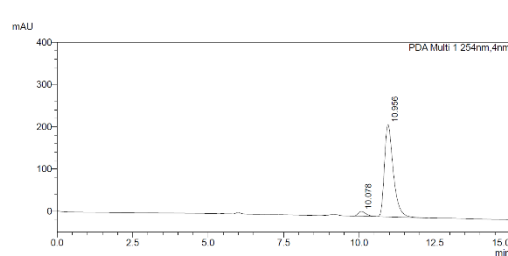

<Peak Table>

| Peak# | Ret. Time | Height | Height% | Area    | Area%   |
|-------|-----------|--------|---------|---------|---------|
| 1     | 10.078    | 11294  | 4.867   | 206445  | 4.424   |
| 2     | 10.956    | 216974 | 95.133  | 4459941 | 95.576  |
| Total |           | 230178 | 100.000 | 4666385 | 100.000 |

#### 4.2.17 Synthesis of (*S, E*)-2-(3-(thiophen-2-yl)allyl)tetrahydrofuran (**8q**)

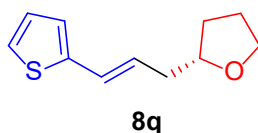

Prepared according to typical procedure at 0 °C for 72 hours by using [Pd(allyl)Cl]<sub>2</sub> (2.5 mol%), **Xu9** (10 mol%) from  $\gamma$ -hydroxyalkenes (0.5 mmol) and alkenyl bromide (1 mmol), after flash column chromatography on a silica gel (petroleum ether: ethyl acetate = 50: 1) give the product **8q** as a white liquid (64 mg, 65% yield) with 91% ee.  $[\alpha]_D^{20} = 5.3$  ( $c = 0.4$ , Chloroform). <sup>1</sup>H NMR (400 MHz, Chloroform-*d*)  $\delta$  7.09 (dt,  $J = 5.1, 0.8$  Hz, 1H), 6.97 – 6.84 (m, 2H), 6.58 (dd,  $J = 15.7, 1.6$  Hz, 1H), 6.07 (dt,  $J = 15.7, 7.2$  Hz, 1H), 4.01 – 3.84 (m, 2H), 3.74 (td,  $J = 7.8, 6.4$  Hz, 1H), 2.54 – 2.26 (m, 2H), 2.00 (dddd,  $J = 11.4, 8.4, 6.4, 4.9$  Hz, 1H), 1.94 – 1.81 (m, 2H), 1.55 (ddt,  $J = 11.7, 8.4, 7.4$  Hz, 1H). <sup>13</sup>C NMR (100 MHz, Chloroform-*d*)  $\delta$  142.8, 127.2, 126.7, 125.2, 124.7, 123.4, 78.6, 68.0, 39.1, 30.9, 25.8. HRMS (ESI) calculated for [C<sub>11</sub>H<sub>15</sub>OS] [M+H]<sup>+</sup>:195.0838 found: 195.837. Enantiomeric excess was determined by HPLC with a Chiralpak OD-H column (hexanes: 2-propanol = 95: 5, 0.6 mL/min, 254 nm); major enantiomer tr = 15.378 min, minor enantiomer tr = 11.923 min.

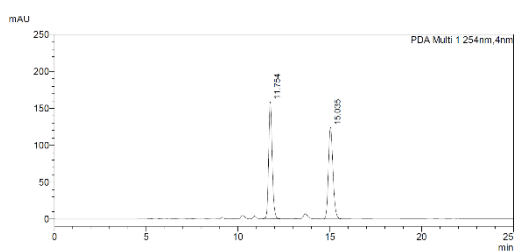

<Peak Table>  
PDA Ch1 254nm

| Peak# | Ret. Time | Height | Height% | Area    | Area%   |
|-------|-----------|--------|---------|---------|---------|
| 1     | 11.754    | 158840 | 56.135  | 2138142 | 50.154  |
| 2     | 15.035    | 124119 | 43.865  | 2122985 | 49.846  |
| Total |           | 282959 | 100.000 | 4258127 | 100.000 |

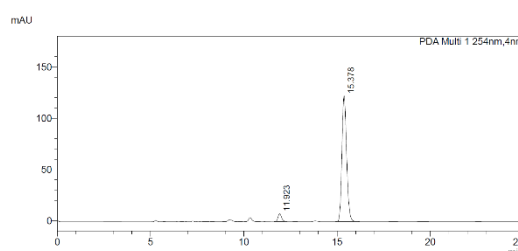

<Peak Table>  
PDA Ch1 254nm

| Peak# | Ret. Time | Height | Height% | Area    | Area%   |
|-------|-----------|--------|---------|---------|---------|
| 1     | 11.923    | 7758   | 5.955   | 102316  | 4.570   |
| 2     | 15.378    | 122514 | 94.045  | 2138413 | 95.430  |
| Total |           | 130271 | 100.000 | 2238729 | 100.000 |

#### 4.2.18 Synthesis of (*S, E*)-2-(3-(naphthalen-1-yl)allyl)tetrahydrofuran (**8r**)

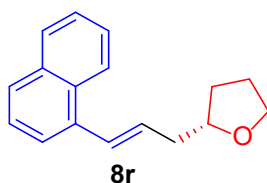

Prepared according to typical procedure at 0 °C for 72 hours by using [Pd(allyl)Cl]<sub>2</sub> (2.5 mol%), **Xu9** (10 mol%) from  $\gamma$ -hydroxyalkenes (0.5 mmol) and alkenyl bromide (1 mmol), after flash column chromatography on a silica gel (petroleum ether: ethyl acetate = 50: 1) give the product **8r** as a white liquid (79 mg, 66% yield) with 92% ee.  $[\alpha]_D^{20} = -4.0$  ( $c = 0.4$ , Chloroform). <sup>1</sup>H NMR (400 MHz, Chloroform-*d*)  $\delta$  8.17 – 8.06 (m, 1H), 7.83 (dd,  $J = 8.0, 1.6$  Hz, 1H), 7.74 (d,  $J = 8.2$  Hz, 1H),

7.57 (dt,  $J = 7.1, 0.9$  Hz, 1H), 7.53 – 7.39 (m, 3H), 7.19 (d,  $J = 15.6$  Hz, 1H), 6.25 (dt,  $J = 15.5, 7.1$  Hz, 1H), 4.03 (dq,  $J = 7.7, 6.3$  Hz, 1H), 3.93 (ddd,  $J = 8.3, 7.2, 6.2$  Hz, 1H), 3.77 (td,  $J = 7.9, 6.4$  Hz, 1H), 2.58 (dddd,  $J = 44.9, 14.0, 7.6, 6.3, 1.5$  Hz, 2H), 2.04 (dddd,  $J = 11.6, 8.5, 6.5, 4.9$  Hz, 1H), 1.99 – 1.81 (m, 2H), 1.69 – 1.61 (m, 1H).  $^{13}\text{C}$  NMR (100 MHz, Chloroform- $d$ )  $\delta$  135.4, 133.6, 131.1, 130.1, 129.2, 128.5, 127.5, 125.9, 125.7, 123.9, 123.7, 78.8, 68.1, 39.6, 30.9, 25.8. HRMS (ESI) calculated for  $[\text{C}_{17}\text{H}_{18}\text{NaO}] [\text{M}+\text{Na}]^+$ : 261.1250 found: 261.1256. Enantiomeric excess was determined by HPLC with a Chiralpak OD-H column (hexanes: 2-propanol = 95: 5, 0.6 mL/min, 254 nm); major enantiomer  $t_r = 16.388$  min, minor enantiomer  $t_r = 15.385$  min.

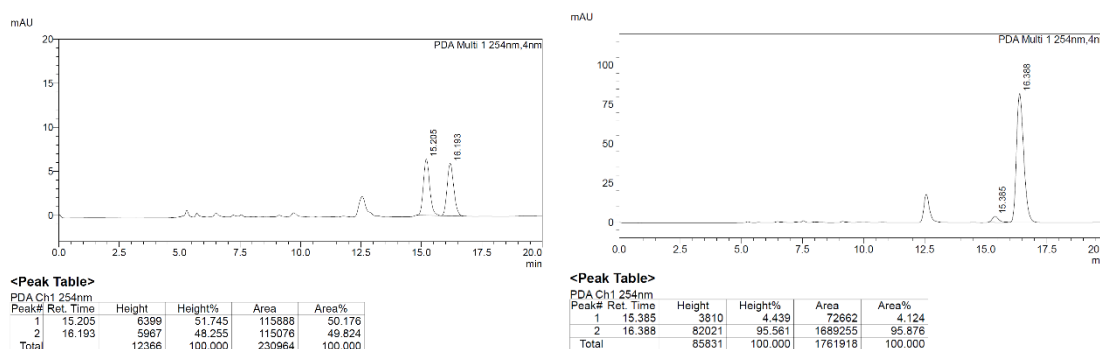

#### 4.2.19 Synthesis of (*S, E*)-2-(3-(naphthalen-2-yl)allyl)tetrahydrofuran (**8s**)

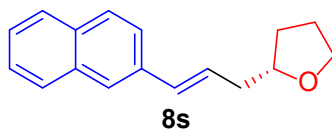

Prepared according to typical procedure at 0 °C for 72 hours by using  $[\text{Pd}(\text{allyl})\text{Cl}]_2$  (2.5 mol%), **Xu9** (10 mol%) from  $\gamma$ -hydroxyalkenes (0.5 mmol) and alkenyl bromide (1 mmol), after flash column chromatography on a silica gel (petroleum ether: ethyl acetate = 50: 1) give the product **8s** as a yellow solid (69 mg, 58% yield) with 90% ee. Mp: 31.2– 34.3 °C.  $[\alpha]_{\text{D}}^{20} = 0.9$  ( $c = 0.4$ , Chloroform).  $^1\text{H}$  NMR (400 MHz, Chloroform- $d$ )  $\delta$  7.75 (t,  $J = 8.3$  Hz, 3H), 7.67 (d,  $J = 1.6$  Hz, 1H), 7.58 (dd,  $J = 8.6, 1.7$  Hz, 1H), 7.40 (pd,  $J = 7.0, 1.4$  Hz, 2H), 6.59 (d,  $J = 15.8$  Hz, 1H), 6.35 (dt,  $J = 15.9, 7.1$  Hz, 1H), 4.07 – 3.85 (m, 2H), 3.81 – 3.69 (m, 1H), 2.48 (dq,  $J = 30.7, 7.2$  Hz, 2H), 2.05 – 1.93 (m, 1H), 1.93 – 1.79 (m, 2H), 1.56 (dq,  $J = 11.7, 7.8$  Hz, 1H).  $^{13}\text{C}$  NMR (100 MHz, Chloroform- $d$ )  $\delta$  134.9, 133.5, 132.6, 131.9, 127.9, 127.8, 127.5, 127.2, 126.0, 125.6, 125.5, 123.5, 78.7, 67.9, 39.3, 30.8, 25.6. HRMS (ESI) calculated for  $[\text{C}_{17}\text{H}_{18}\text{NaO}] [\text{M}+\text{Na}]^+$ : 261.1250 found: 261.1255. Enantiomeric excess was determined by HPLC with a Chiralpak AD-H column (hexanes:

2-propanol = 95: 5, 0.6 mL/min, 254 nm); major enantiomer  $t_r$  = 11.337 min, minor enantiomer  $t_r$  = 10.624 min.

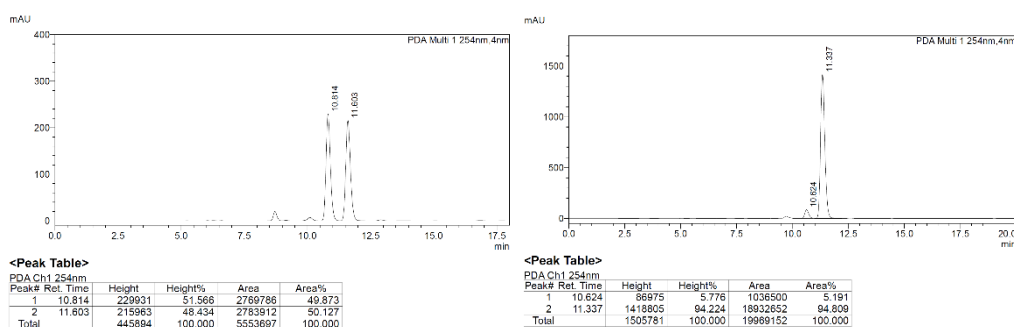

#### 4.2.20 Synthesis of (*S*)-2-((2*E*,4*E*)-5-phenylpenta-2,4-dien-1-yl)tetrahydrofuran (**8t**)

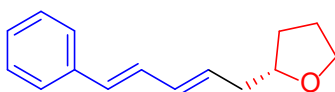

**8t**

Prepared according to typical procedure at 0 °C for 72 hours by using [Pd(allyl)Cl]<sub>2</sub> (2.5 mol%), **Xu9** (10 mol%) from  $\gamma$ -hydroxyalkenes (0.5 mmol) and alkenyl bromide (1 mmol), after flash column chromatography on a silica gel (petroleum ether: ethyl acetate = 50: 1) give the product **8t** as a white liquid (78 mg, 73% yield) with 91% ee.  $[\alpha]_D^{20} = 4.4$  ( $c = 0.4$ , Chloroform). <sup>1</sup>H NMR (400 MHz, Chloroform-*d*)  $\delta$  7.41 – 7.34 (m, 2H), 7.29 (dd,  $J = 8.5, 6.8$  Hz, 2H), 7.23 – 7.15 (m, 1H), 6.76 (dd,  $J = 15.6, 10.4$  Hz, 1H), 6.46 (d,  $J = 15.7$  Hz, 1H), 6.36 – 6.19 (m, 1H), 5.83 (dt,  $J = 14.9, 7.3$  Hz, 1H), 4.01 – 3.83 (m, 2H), 3.74 (td,  $J = 7.9, 6.5$  Hz, 1H), 2.51 – 2.27 (m, 2H), 2.06 – 1.77 (m, 3H), 1.53 (ddt,  $J = 11.8, 8.5, 7.5$  Hz, 1H). <sup>13</sup>C NMR (100 MHz, Chloroform-*d*)  $\delta$  137.6, 132.6, 131.4, 130.7, 129.2, 128.6, 127.2, 126.2, 78.8, 68.0, 39.1, 30.9, 25.7. HRMS (ESI) calculated for [C<sub>15</sub>H<sub>18</sub>NaO] [M+Na]<sup>+</sup>: 237.1250 found: 237.1249. Enantiomeric excess was determined by HPLC with a Chiralpak OD-H column (hexanes: 2-propanol = 95: 5, 0.6 mL/min, 254 nm); major enantiomer  $t_r$  = 9.507 min, minor enantiomer  $t_r$  = 10.029 min.

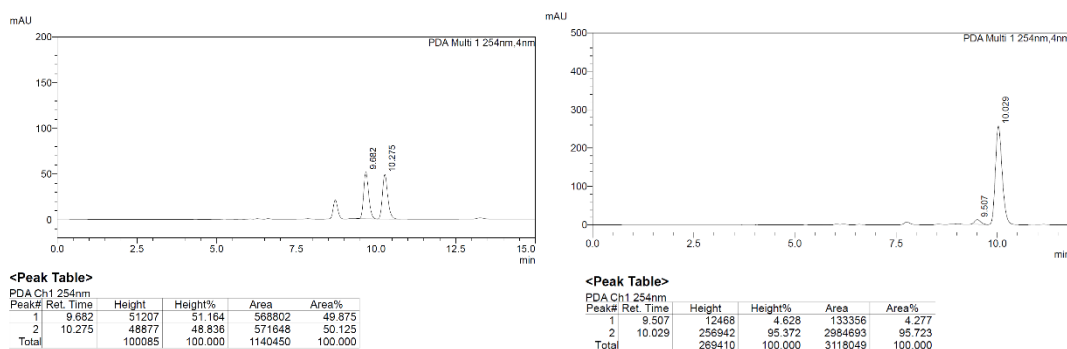

#### 4.2.21 Synthesis of (*S*)-2-(2-phenylallyl)tetrahydrofuran (**8u**)



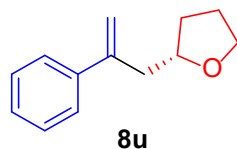

Prepared according to typical procedure at 0 °C for 72 hours by using [Pd(allyl)Cl]<sub>2</sub> (2.5 mol%), **Xu9** (10 mol%) from  $\gamma$ -hydroxyalkenes (0.5 mmol) and alkenyl bromide (1 mmol), after flash column chromatography on a silica gel (petroleum ether: ethyl acetate = 50: 1) give the product **8u** as a white liquid (32 mg, 34% yield) with 87% *ee*.  $[\alpha]_D^{20} = -1.4$  (*c* = 0.4, Chloroform). <sup>1</sup>H NMR (400 MHz, Chloroform-*d*)  $\delta$  7.45 – 7.38 (m, 2H), 7.32 (ddd, *J* = 8.1, 7.1, 1.1 Hz, 2H), 7.29 – 7.26 (m, 1H), 5.34 (d, *J* = 1.5 Hz, 1H), 5.15 (q, *J* = 1.3 Hz, 1H), 4.00 – 3.84 (m, 2H), 3.69 (td, *J* = 8.2, 6.2 Hz, 1H), 2.88 (ddd, *J* = 14.3, 6.5, 1.3 Hz, 1H), 2.60 (ddd, *J* = 14.3, 7.0, 1.2 Hz, 1H), 1.97 – 1.73 (m, 3H), 1.58 – 1.43 (m, 1H). <sup>13</sup>C NMR (100 MHz, Chloroform-*d*)  $\delta$  145.7, 141.1, 128.5, 128.3, 127.4, 126.2, 126.1, 114.2, 77.6, 67.8, 41.6, 31.1, 25.6. HRMS (ESI) calculated for [C<sub>13</sub>H<sub>17</sub>O] [M+H]<sup>+</sup>: 189.1274 found: 189.1278. Enantiomeric excess was determined by HPLC with a Chiralpak AD-H column (hexanes: 2-propanol = 95: 5, 0.6 mL/min, 254 nm); major enantiomer *tr* = 7.345 min, minor enantiomer *tr* = 7.893 min.

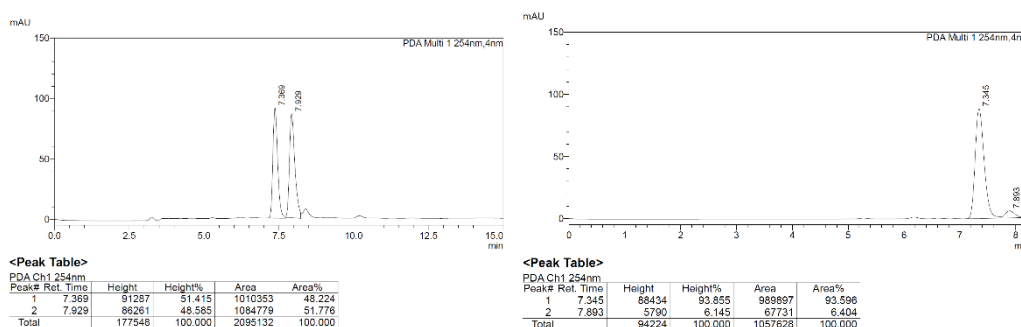

#### 4.2.22 Synthesis of (S)-2-((1H-inden-2-yl)methyl)tetrahydrofuran (**8v**)

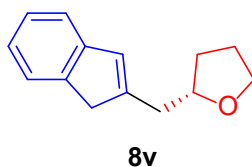

Prepared according to typical procedure at 0 °C for 72 hours by using [Pd(allyl)Cl]<sub>2</sub> (2.5 mol%), **Xu9** (10 mol%) from  $\gamma$ -hydroxyalkenes (0.5 mmol) and alkenyl bromide (1 mmol), after flash column chromatography on a silica gel (petroleum ether: ethyl acetate = 50: 1) give the product **8v** as a white liquid (82 mg, 82% yield) with 95% *ee*.  $[\alpha]_D^{20} = -3.7$  (*c* = 0.4, Chloroform). <sup>1</sup>H NMR (400 MHz, Chloroform-*d*)  $\delta$  7.38 (dq, *J* = 7.4, 0.9 Hz, 1H), 7.28 (dt, *J* = 7.5, 0.9 Hz, 1H), 7.21 (td, *J*

= 7.4, 1.0 Hz, 1H), 7.10 (td,  $J = 7.4, 1.3$  Hz, 1H), 6.61 – 6.57 (m, 1H), 4.11 (dq,  $J = 7.6, 6.4$  Hz, 1H), 3.91 (ddd,  $J = 8.3, 7.1, 6.2$  Hz, 1H), 3.75 (td,  $J = 7.9, 6.5$  Hz, 1H), 3.42 – 3.34 (m, 2H), 2.78 (ddd,  $J = 14.8, 6.6, 1.3$  Hz, 1H), 2.66 (ddd,  $J = 14.8, 6.2, 1.1$  Hz, 1H), 2.02 (dddd,  $J = 11.6, 8.4, 6.4, 5.0$  Hz, 1H), 1.96 – 1.83 (m, 2H), 1.59 – 1.51 (m, 1H).  $^{13}\text{C}$  NMR (100 MHz, Chloroform- $d$ )  $\delta$  147.1, 145.4, 143.3, 128.0, 126.2, 123.8, 123.4, 120.1, 78.6, 67.9, 41.7, 37.4, 31.3, 25.7. HRMS (ESI) calculated for  $[\text{C}_{14}\text{H}_{17}\text{O}] [\text{M}+\text{H}]^+$ : 201.1274 found: 201.1278. Enantiomeric excess was determined by HPLC with a Chiralpak OD-H column (hexanes: 2-propanol = 95: 5, 0.6 mL/min, 254 nm); major enantiomer  $t_r = 10.973$  min, minor enantiomer  $t_r = 10.363$  min.

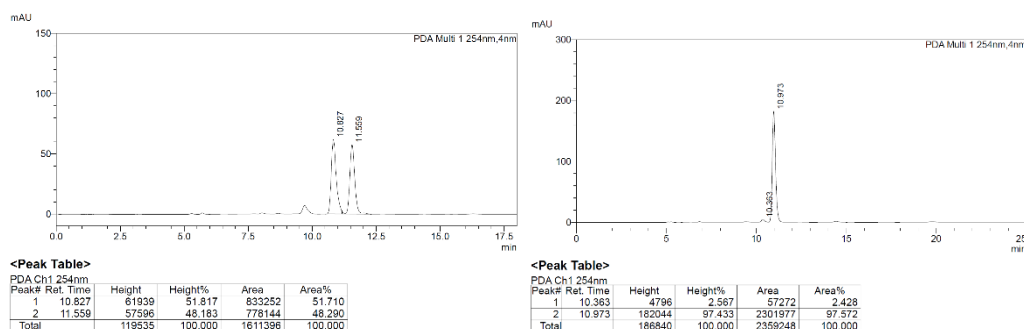

#### 4.2.23 Synthesis of (*S*)-2-((*R*, *E*)-3-(4-methoxyphenyl)allyl-1-d)tetrahydrofuran (**8-D**)

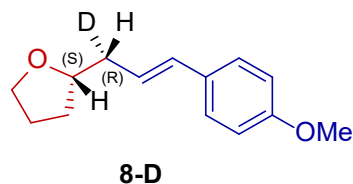

Prepared according to typical procedure at 0 °C for 36 hours by using  $[\text{Pd}(\text{allyl})\text{Cl}]_2$  (2.5 mol%), **Xu9** (10 mol%) from D- $\gamma$ -hydroxyalkenes (0.5 mmol) and alkenyl bromide (1 mmol), after flash column chromatography on a silica gel (petroleum ether: ethyl acetate = 50: 1) give the product **8-D** as a white liquid (68 mg, 62% yield) with 92% *ee*, >20:1 dr.  $[\alpha]_{\text{D}}^{20} = -2.5$  ( $c = 0.4$ , Chloroform).  $^1\text{H}$  NMR (400 MHz, Chloroform- $d$ )  $\delta$  7.31 – 7.26 (m, 2H), 6.89 – 6.77 (m, 2H), 6.39 (dd,  $J = 15.9, 1.4$  Hz, 1H), 6.08 (dd,  $J = 15.8, 7.0$  Hz, 1H), 3.98 – 3.85 (m, 2H), 3.78 (s, 3H), 3.74 (td,  $J = 7.9, 6.4$  Hz, 1H), 2.45 (td,  $J = 6.7, 1.7$  Hz, 1H), 1.98 (dddd,  $J = 11.4, 8.6, 6.4, 4.9$  Hz, 1H), 1.92 – 1.79 (m, 2H), 1.55 (ddt,  $J = 11.7, 8.5, 7.5$  Hz, 1H).  $^{13}\text{C}$  NMR (100 MHz, Chloroform- $d$ )  $\delta$  158.7, 131.2, 130.3, 127.1, 124.4, 113.8, 78.8, 67.9, 55.2, 39.1-38.4 (m), 30.7, 25.7. RMS (ESI) calculated for  $[\text{C}_{14}\text{H}_{17}\text{DNaO}_2] [\text{M}+\text{Na}]^+$ : 242.1262 found: 242.1258. Enantiomeric excess was determined by HPLC with a Chiralpak OD-H column (hexanes: 2-propanol = 99: 1, 0.6 mL/min, 254 nm); major enantiomer  $t_r = 27.808$  min, minor enantiomer  $t_r = 21.379$  min.

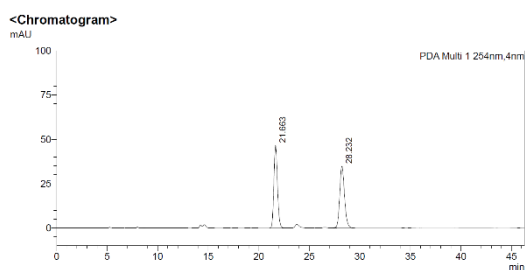

<Peak Table>

| Peak# | Ret. Time | Height | Height% | Area    | Area%   |
|-------|-----------|--------|---------|---------|---------|
| 1     | 21.663    | 46657  | 57.187  | 1151447 | 49.928  |
| 2     | 28.232    | 34929  | 42.813  | 1154755 | 50.072  |
| Total |           | 81586  | 100.000 | 2306202 | 100.000 |

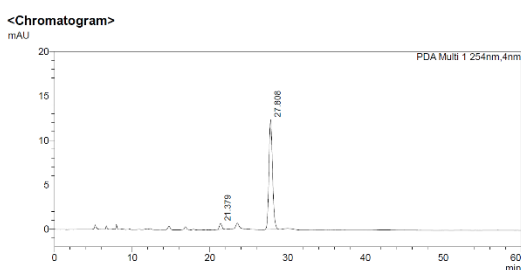

<Peak Table>

| Peak# | Ret. Time | Height | Height% | Area   | Area%   |
|-------|-----------|--------|---------|--------|---------|
| 1     | 21.379    | 681    | 5.216   | 15769  | 3.804   |
| 2     | 27.808    | 12371  | 94.784  | 398785 | 96.196  |
| Total |           | 13051  | 100.000 | 414554 | 100.000 |

### 4.3 General procedure for reactions of primary /secondary $\gamma$ -hydroxy alkenes with **2b**

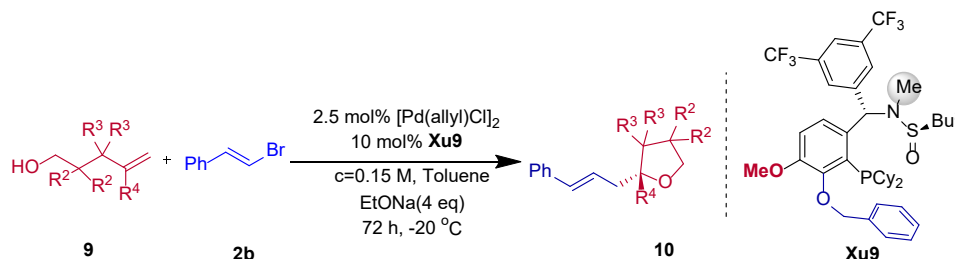

To a sealed tube was added  $[\text{Pd}(\text{allyl})\text{Cl}]_2$  (2.5 mol%), **Xu9** (10 mol%). The flask was evacuated and refilled with argon. Then  $\gamma$ -hydroxyalkenes (0.5 mmol), alkenyl halides (1 mmol), EtONa (4.0 equiv.), and solution of toluene (3.5 mL) was added to the tube, and stirred at  $-20^\circ\text{C}$  for 72 hours. After the reaction was complete (monitored by TLC), solvent was removed under reduced pressure. The crude product was then purified by flash column chromatography on silica gel to afford the desired product.

#### 4.3.1 Synthesis of (*R*)-3,3-dibenzyl-2-cinnamyltetrahydrofuran (**10a**)

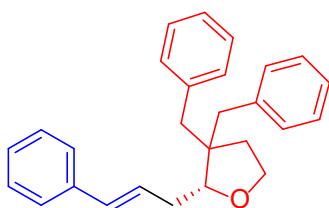

**10a**

Prepared according to typical procedure at  $-20^\circ\text{C}$  for 72 hours by using  $[\text{Pd}(\text{allyl})\text{Cl}]_2$  (2.5 mol%), **Xu9** (10 mol%) from  $\gamma$ -hydroxyalkenes **9a** (0.5 mmol) and alkenyl bromide (1 mmol), after flash column chromatography on a silica gel (petroleum ether: ethyl acetate = 50: 1) give the product **10a** as a white liquid (116 mg, 63% yield) with 93% *ee*.  $[\alpha]_D^{20} = 59.5$  ( $c = 0.4$ , Chloroform).  $^1\text{H NMR}$  (400 MHz, Chloroform-*d*)  $\delta$  7.39 – 7.31 (m, 4H), 7.30 – 7.16 (m, 9H), 7.05 – 7.00 (m, 2H), 6.50 (d,  $J = 15.8 \text{ Hz}$ , 1H), 6.32 (dt,  $J = 15.8, 6.9 \text{ Hz}$ , 1H), 4.00 – 3.89 (m, 1H), 3.67 (ddt,  $J = 9.7, 6.7, 3.2$

Hz, 2H), 2.88 – 2.73 (m, 3H), 2.68 – 2.60 (m, 1H), 2.56 – 2.42 (m, 2H), 1.83 (ddd,  $J = 12.8, 7.4, 3.2$  Hz, 1H), 1.67 – 1.57 (m, 1H).  $^{13}\text{C}$  NMR (100 MHz, Chloroform- $d$ )  $\delta$  138.7, 137.6, 137.4, 131.6, 131.0, 130.9, 128.5, 128.2, 128.1, 128.0, 127.1, 126.4, 126.2, 82.8, 65.1, 48.0, 39.9, 38.7, 33.1, 31.7. HRMS (ESI) calculated for  $[\text{C}_{27}\text{H}_{28}\text{NaO}]$   $[\text{M}+\text{Na}]^+$ : 391.2032 found: 391.2022. Enantiomeric excess was determined by HPLC with a Chiralpak AD-H column (hexanes: 2-propanol = 99: 1, 0.6 mL/min, 254 nm); major enantiomer  $t_r = 13.311$  min, minor enantiomer  $t_r = 11.545$  min.

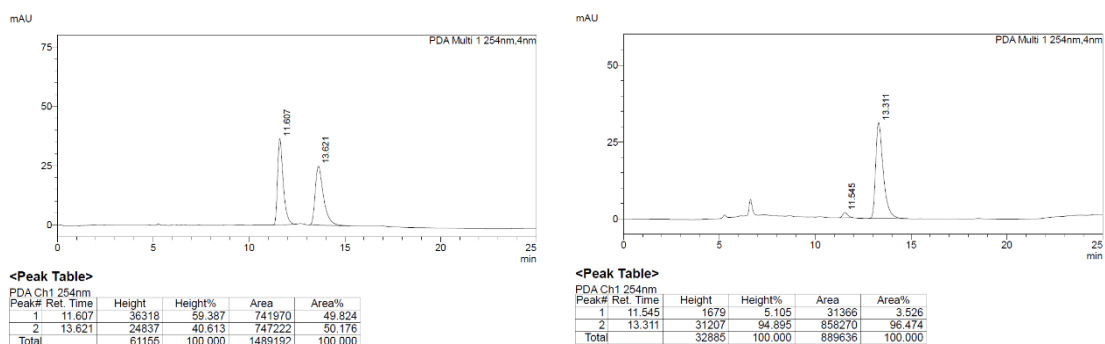

#### 4.3.2 Synthesis of (*R*)-2-cinnamyl-3,3-bis(4-methylbenzyl)tetrahydrofuran (**10b**)

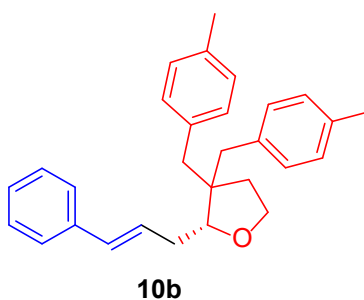

Prepared according to typical procedure at  $-20$  °C for 72 hours by using  $[\text{Pd}(\text{allyl})\text{Cl}]_2$  (2.5 mol%), **Xu9** (10 mol%) from  $\gamma$ -hydroxyalkenes (0.5 mmol) and alkenyl bromide (1 mmol), after flash column chromatography on a silica gel (petroleum ether: ethyl acetate = 50: 1) give the product **10b** as a white liquid (116 mg, 63% yield) with 92% *ee*.  $[\alpha]_D^{20} = 41.1$  ( $c = 0.4$ , Chloroform).  $^1\text{H}$  NMR (400 MHz, Chloroform- $d$ )  $\delta$  7.40 – 7.35 (m, 2H), 7.28 (dd,  $J = 8.4, 6.8$  Hz, 2H), 7.21 – 7.09 (m, 5H), 7.05 (d,  $J = 7.8$  Hz, 2H), 6.97 – 6.86 (m, 2H), 6.50 (d,  $J = 15.7$  Hz, 1H), 6.32 (dt,  $J = 15.8, 6.9$  Hz, 1H), 3.99 – 3.87 (m, 1H), 3.66 (ddd,  $J = 9.4, 8.3, 3.1$  Hz, 2H), 2.84 – 2.68 (m, 3H), 2.63 – 2.56 (m, 1H), 2.48 (ddd,  $J = 13.2, 6.7, 3.0, 1.4$  Hz, 2H), 2.36 (s, 3H), 2.30 (s, 3H), 1.82 (ddd,  $J = 12.7, 7.4, 3.1$  Hz, 1H), 1.66 – 1.57 (m, 1H).  $^{13}\text{C}$  NMR (100 MHz, Chloroform- $d$ )  $\delta$  137.7, 135.8, 135.5, 134.3, 131.4, 130.8, 130.8, 128.9, 128.8, 128.5, 128.1, 127.0, 126.2, 82.8, 65.1, 48.0, 39.4, 38.2, 33.1, 31.6, 21.1, 21.1, 21.0. HRMS (ESI) calculated for  $[\text{C}_{29}\text{H}_{32}\text{NaO}]$   $[\text{M}+\text{Na}]^+$ : 419.2345 found: 419.2354. Enantiomeric excess was determined by HPLC with a Chiralpak AS-H column (hexanes:

2-propanol = 99: 1, 0.6 mL/min, 254 nm); major enantiomer tr = 9.629 min, minor enantiomer tr = 7.807 min.

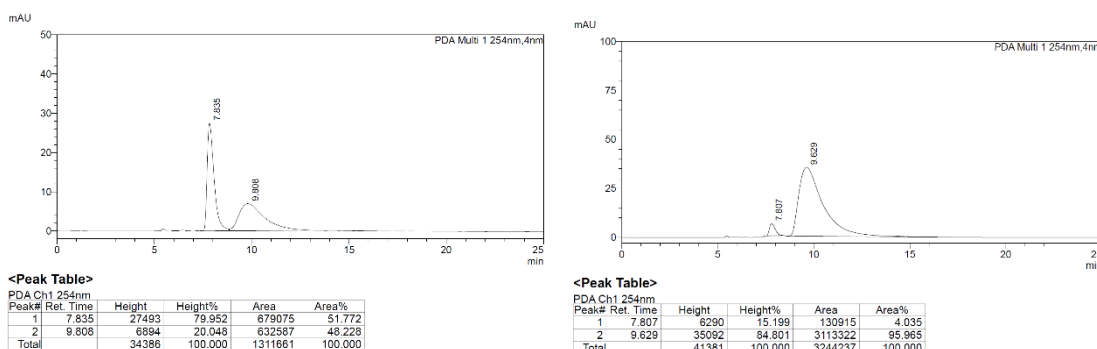

### 4.3.3 Synthesis of (*R*)-2-cinnamyl-3,3-bis(4-fluorobenzyl)tetrahydrofuran (**10c**)

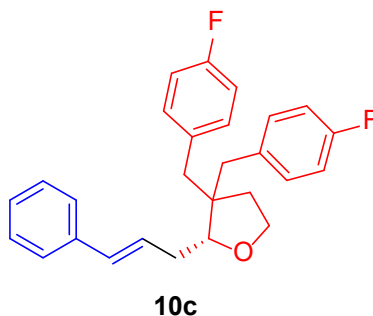

Prepared according to typical procedure at -20 °C for 72 hours by using [Pd(allyl)Cl]<sub>2</sub> (2.5 mol%), **Xu9** (10 mol%) from  $\gamma$ -hydroxyalkenes (0.5 mmol) and alkenyl bromide (1 mmol), after flash column chromatography on a silica gel (petroleum ether: ethyl acetate = 50: 1) give the product **10c** as a white liquid (140 mg, 69% yield) with 93% *ee*.  $[\alpha]_D^{20} = 57.1$  ( $c = 0.4$ , Chloroform). <sup>1</sup>H NMR (400 MHz, Chloroform-*d*)  $\delta$  7.40 – 7.33 (m, 2H), 7.29 (dd,  $J = 8.4, 6.8$  Hz, 2H), 7.24 – 7.12 (m, 3H), 7.08 – 6.89 (m, 6H), 6.51 (d,  $J = 15.9$  Hz, 1H), 6.31 (dt,  $J = 15.8, 6.9$  Hz, 1H), 3.92 (td,  $J = 8.7, 7.5$  Hz, 1H), 3.73 – 3.59 (m, 2H), 2.82 (d,  $J = 13.7$  Hz, 1H), 2.79 – 2.67 (m, 2H), 2.59 (d,  $J = 13.7$  Hz, 1H), 2.54 – 2.44 (m, 2H), 1.79 (ddd,  $J = 12.8, 7.5, 3.3$  Hz, 1H), 1.65 – 1.53 (m, 1H). <sup>13</sup>C NMR (100 MHz, Chloroform-*d*)  $\delta$  161.72 (d,  $J = 244.9$  Hz), 161.64 (d,  $J = 245.1$  Hz), 137.4, 134.1 (d,  $J = 3.3$  Hz), 132.8 (d,  $J = 3.4$  Hz), 132.8, 132.8, 132.2, 132.1, 131.7, 128.5, 127.6, 127.2, 126.2, 115.1 (d,  $J = 10.5$  Hz), 114.9 (d,  $J = 10.4$  Hz), 82.7, 65.0, 47.9, 39.0, 37.9, 33.1, 31.5. <sup>19</sup>F NMR (376 MHz, CDCl<sub>3</sub>)  $\delta$  -116.37, -116.57. HRMS (ESI) calculated for [C<sub>27</sub>H<sub>26</sub>F<sub>2</sub>NaO] [M+Na]<sup>+</sup>: 427.1844 found: 427.1848. Enantiomeric excess was determined by HPLC with a Chiralpak AD-H column (hexanes: 2-propanol = 95: 5, 0.6 mL/min, 254 nm); major enantiomer tr = 15.830 min, minor enantiomer tr = 13.675 min.

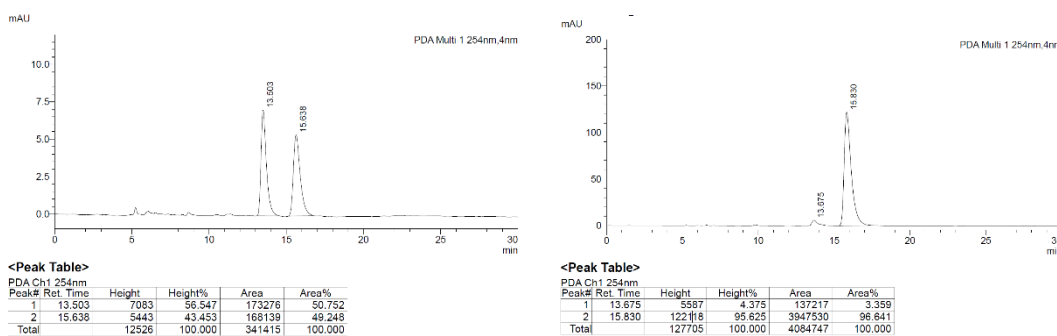

#### 4.3.4 Synthesis of (*R*)-3,3-bis(4-chlorobenzyl)-2-cinnamyltetrahydrofuran (**10d**)

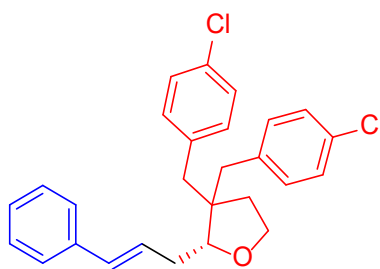

**10d**

Prepared according to typical procedure at  $-20\text{ }^{\circ}\text{C}$  for 72 hours by using  $[\text{Pd}(\text{allyl})\text{Cl}]_2$  (2.5 mol%), **Xu9** (10 mol%) from  $\gamma$ -hydroxyalkenes (0.5 mmol) and alkenyl bromide (1 mmol), after flash column chromatography on a silica gel (petroleum ether: ethyl acetate = 50: 1) give the product **10d** as a yellow solid (170 mg, 78% yield) with 94% *ee*. Mp: 86.0-89.1  $^{\circ}\text{C}$ .  $[\alpha]_{\text{D}}^{20} = 41.0$  ( $c = 0.4$ , Chloroform).  $^1\text{H}$  NMR (400 MHz, Chloroform-*d*)  $\delta$  7.40 – 7.34 (m, 2H), 7.33 – 7.26 (m, 4H), 7.25 – 7.17 (m, 3H), 7.16 – 7.09 (m, 2H), 6.97 – 6.91 (m, 2H), 6.51 (d,  $J = 15.7$  Hz, 1H), 6.30 (dt,  $J = 15.8$ , 6.9 Hz, 1H), 3.91 (td,  $J = 8.7$ , 7.5 Hz, 1H), 3.71 – 3.57 (m, 2H), 2.82 (d,  $J = 13.5$  Hz, 1H), 2.78 – 2.66 (m, 2H), 2.63 – 2.55 (m, 1H), 2.54 – 2.39 (m, 2H), 1.78 (ddd,  $J = 12.9$ , 7.5, 3.3 Hz, 1H), 1.64 – 1.56 (m, 1H).  $^{13}\text{C}$  NMR (100 MHz, Chloroform-*d*)  $\delta$  137.4, 136.8, 135.5, 132.4, 132.1, 132.1, 131.7, 128.5, 128.4, 128.3, 127.4, 127.2, 126.2, 82.6, 64.9, 47.9, 39.2, 38.1, 33.0, 31.5. HRMS (ESI) calculated for  $[\text{C}_{27}\text{H}_{26}\text{Cl}_2\text{NaO}]$   $[\text{M}+\text{Na}]^+$ : 459.1253 found: 459.1263. Enantiomeric excess was determined by HPLC with a Chiralpak AD-H column (hexanes: 2-propanol = 95: 5, 0.6 mL/min, 254 nm); major enantiomer  $t_r = 15.804$  min, minor enantiomer  $t_r = 14.077$  min.

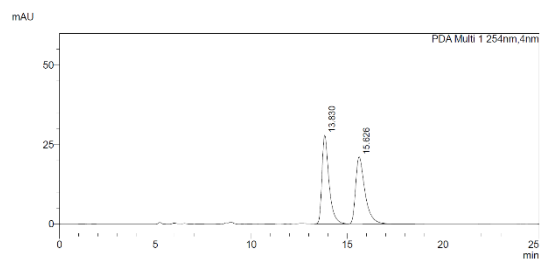

<Peak Table>

| Peak# | Ret. Time | Height | Height% | Area    | Area%   |
|-------|-----------|--------|---------|---------|---------|
| 1     | 13.830    | 27864  | 56.930  | 706017  | 49.857  |
| 2     | 15.826    | 21080  | 43.070  | 710054  | 50.143  |
| Total |           | 48943  | 100.000 | 1416071 | 100.000 |

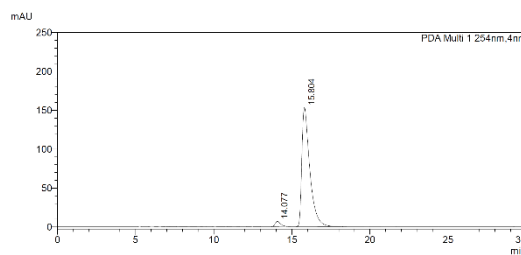

<Peak Table>

| Peak# | Ret. Time | Height | Height% | Area    | Area%   |
|-------|-----------|--------|---------|---------|---------|
| 1     | 14.077    | 6560   | 4.099   | 154553  | 2.763   |
| 2     | 15.804    | 153468 | 85.901  | 5440036 | 97.237  |
| Total |           | 160028 | 100.000 | 5594589 | 100.000 |

### 4.3.5 Synthesis of (*R*)-2-cinnamyl-3,3-bis(4-(trifluoromethyl)benzyl)tetrahydrofuran (**10e**)

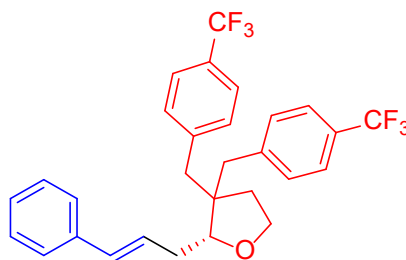

**10e**

Prepared according to typical procedure at -20 °C for 72 hours by using [Pd(allyl)Cl]<sub>2</sub> (2.5 mol%), **Xu9** (10 mol%) from  $\gamma$ -hydroxyalkenes (0.5 mmol) and alkenyl bromide (1 mmol), after flash column chromatography on a silica gel (petroleum ether: ethyl acetate = 50: 1) give the product **10e** as a white liquid (192 mg, 76% yield) with 93% *ee*. [ $\alpha$ ]<sub>D</sub><sup>20</sup> = 41.5 (*c* = 0.4, Chloroform). <sup>1</sup>H NMR (400 MHz, Chloroform-*d*)  $\delta$  7.61 (d, *J* = 8.0 Hz, 2H), 7.52 (d, *J* = 7.9 Hz, 2H), 7.43 – 7.36 (m, 2H), 7.31 (td, *J* = 8.0, 6.2 Hz, 4H), 7.24 – 7.19 (m, 1H), 7.14 (d, *J* = 7.9 Hz, 2H), 6.61 – 6.43 (m, 1H), 6.32 (dt, *J* = 15.8, 6.9 Hz, 1H), 3.95 (td, *J* = 8.6, 7.5 Hz, 1H), 3.77 – 3.56 (m, 2H), 2.94 (d, *J* = 13.5 Hz, 1H), 2.84 (s, 2H), 2.71 (d, *J* = 13.5 Hz, 1H), 2.61 – 2.46 (m, 2H), 1.82 (ddd, *J* = 12.9, 7.5, 3.3 Hz, 1H), 1.70 – 1.59 (m, 1H). <sup>13</sup>C NMR (100 MHz, Chloroform-*d*)  $\delta$  142.6 (d, *J* = 1.5 Hz), 141.3 (d, *J* = 1.4 Hz), 137.4, 131.9, 131.2, 131.2, 128.9 (q, *J* = 32.3 Hz), 128.6, 127.3, 126.2, 125.2 (q, *J* = 3.8 Hz), 125.1 (q, *J* = 3.8 Hz), 82.7, 64.9, 48.1, 39.7, 38.7, 33.1, 31.6. <sup>19</sup>F NMR (376 MHz, Chloroform-*d*)  $\delta$  -62.27, -62.32. HRMS (ESI) calculated for [C<sub>29</sub>H<sub>26</sub>F<sub>6</sub>NaO] [M+Na]<sup>+</sup>: 527.1780 found: 527.1783. Enantiomeric excess was determined by HPLC with a Chiralpak AS-H column (hexanes: 2-propanol = 99: 1, 0.6 mL/min, 254 nm); major enantiomer *tr* = 10.681 min, minor enantiomer *tr* = 8.541 min.

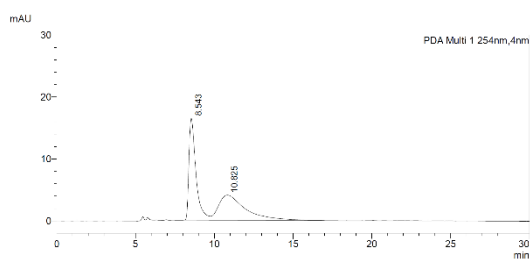

| <Peak Table>  |           |        |         |        |         |
|---------------|-----------|--------|---------|--------|---------|
| PDA Ch1 254nm |           |        |         |        |         |
| Peak#         | Ret. Time | Height | Height% | Area   | Area%   |
| 1             | 8.543     | 18420  | 80.220  | 503695 | 50.737  |
| 2             | 10.825    | 4049   | 19.780  | 488996 | 49.283  |
| Total         |           | 20469  | 100.000 | 992691 | 100.000 |

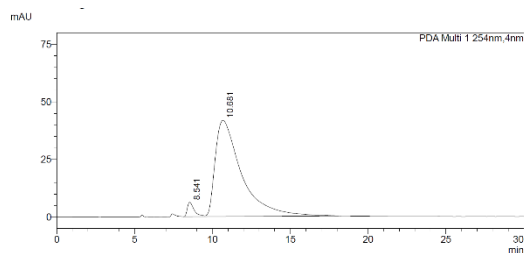

| <Peak Table>  |           |        |         |         |         |
|---------------|-----------|--------|---------|---------|---------|
| PDA Ch1 254nm |           |        |         |         |         |
| Peak#         | Ret. Time | Height | Height% | Area    | Area%   |
| 1             | 8.541     | 6211   | 12.964  | 185678  | 3.652   |
| 2             | 10.681    | 41698  | 87.036  | 4898546 | 96.346  |
| Total         |           | 47909  | 100.000 | 5084224 | 100.000 |

#### 4.3.6 Synthesis of (*R*)-2-cinnamyl-3,3-bis(4-methoxybenzyl)tetrahydrofuran (**10f**)

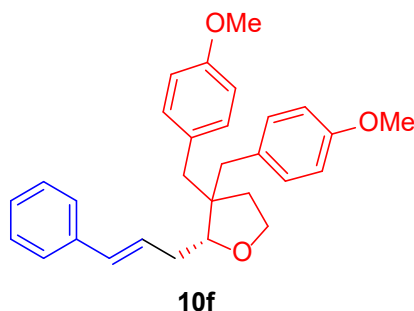

Prepared according to typical procedure at  $-20\text{ }^{\circ}\text{C}$  for 72 hours by using  $[\text{Pd}(\text{allyl})\text{Cl}]_2$  (2.5 mol%), **Xu9** (10 mol%) from  $\gamma$ -hydroxyalkenes (0.5 mmol) and alkenyl bromide (1 mmol), after flash column chromatography on a silica gel (petroleum ether: ethyl acetate = 50: 1) give the product **10f** as a white liquid (136 mg, 63% yield) with 90% *ee*.  $[\alpha]_{\text{D}}^{20} = 45.9$  ( $c = 0.4$ , Chloroform).  $^1\text{H}$  NMR (400 MHz, Chloroform-*d*)  $\delta$  7.31 – 7.25 (m, 2H), 7.18 (t,  $J = 7.6$  Hz, 2H), 7.12 – 7.07 (m, 1H), 7.05 – 7.00 (m, 2H), 6.87 – 6.81 (m, 2H), 6.79 – 6.75 (m, 2H), 6.69 (dq,  $J = 9.6, 3.1, 2.7$  Hz, 2H), 6.40 (d,  $J = 15.8$  Hz, 1H), 6.23 (dt,  $J = 15.8, 6.9$  Hz, 1H), 3.89 – 3.78 (m, 1H), 3.69 (s, 3H), 3.64 (s, 3H), 3.60 – 3.52 (m, 2H), 2.72 – 2.55 (m, 3H), 2.46 (d,  $J = 13.6$  Hz, 1H), 2.42 – 2.31 (m, 2H), 1.70 (ddt,  $J = 14.8, 7.4, 3.7$  Hz, 1H), 1.50 (dt,  $J = 11.9, 9.5$  Hz, 1H).  $^{13}\text{C}$  NMR (100 MHz, Chloroform-*d*)  $\delta$  158.3, 158.2, 137.7, 131.9, 131.8, 131.5, 130.6, 129.4, 128.5, 128.1, 127.1, 126.2, 113.7, 113.5, 82.8, 65.1, 55.3, 55.2, 55.2, 48.1, 39.0, 37.7, 33.1, 31.7. HRMS (ESI) calculated for  $[\text{C}_{29}\text{H}_{32}\text{NaO}_3]$   $[\text{M}+\text{Na}]^+$ : 451.2244 found: 451.2256. Enantiomeric excess was determined by HPLC with a Chiralpak AD-H column (hexanes: 2-propanol = 95: 5, 0.6 mL/min, 254 nm); major enantiomer  $t_r = 22.581$  min, minor enantiomer  $t_r = 24.506$  min.



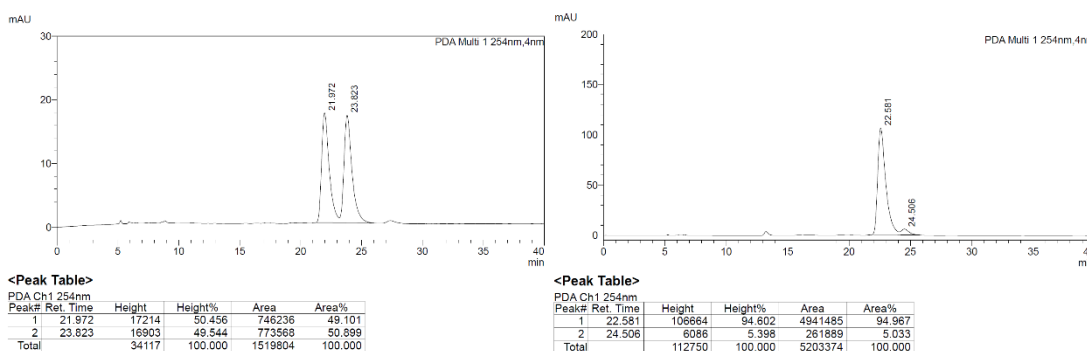

### 4.3.7 Synthesis of (*R*)-2-cinnamyl-3,3-bis(3-methoxybenzyl)tetrahydrofuran (**10g**)

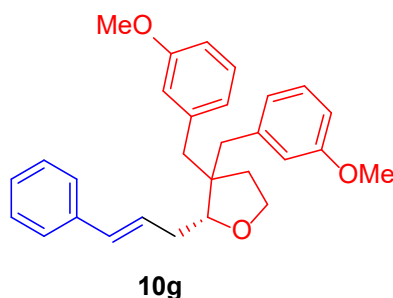

Prepared according to typical procedure at  $-20\text{ }^{\circ}\text{C}$  for 72 hours by using  $[\text{Pd}(\text{allyl})\text{Cl}]_2$  (2.5 mol%), **Xu9** (10 mol%) from  $\gamma$ -hydroxyalkenes (0.5 mmol) and alkenyl bromide (1 mmol), after flash column chromatography on a silica gel (petroleum ether: ethyl acetate = 50: 1) give the product **10g** as a white liquid (137 mg, 64% yield) with 90% *ee*.  $[\alpha]_{\text{D}}^{20} = 56.4$  ( $c = 0.4$ , Chloroform).  $^1\text{H}$  NMR (400 MHz, Chloroform-*d*)  $\delta$  7.39 – 7.31 (m, 2H), 7.25 (dt,  $J = 9.0, 7.6$  Hz, 3H), 7.20 – 7.09 (m, 2H), 6.84 – 6.76 (m, 3H), 6.73 (ddd,  $J = 8.3, 2.6, 0.9$  Hz, 1H), 6.63 (dt,  $J = 7.6, 1.2$  Hz, 1H), 6.58 (dd,  $J = 2.6, 1.6$  Hz, 1H), 6.49 (d,  $J = 15.9$  Hz, 1H), 6.33 (dt,  $J = 15.8, 6.9$  Hz, 1H), 3.94 (td,  $J = 8.7, 7.4$  Hz, 1H), 3.78 (s, 3H), 3.72 – 3.63 (m, 5H), 2.86 – 2.71 (m, 3H), 2.60 (d,  $J = 13.4$  Hz, 1H), 2.54 – 2.37 (m, 2H), 1.85 (ddd,  $J = 12.7, 7.4, 3.2$  Hz, 1H), 1.73 – 1.59 (m, 1H).  $^{13}\text{C}$  NMR (100 MHz, Chloroform-*d*)  $\delta$  159.5, 159.4, 140.3, 139.0, 137.6, 131.6, 129.2, 129.0, 128.5, 128.0, 127.1, 126.2, 123.5, 123.4, 117.2, 116.8, 111.8, 111.3, 83.0, 65.1, 55.2, 55.2, 48.0, 40.1, 38.8, 33.2, 32.0. HRMS (ESI) calculated for  $[\text{C}_{29}\text{H}_{32}\text{NaO}_3]$   $[\text{M}+\text{Na}]^+$ : 451.2244 found: 451.2254. Enantiomeric excess was determined by HPLC with a Chiralpak AD-H column (hexanes: 2-propanol = 90: 10, 0.6 mL/min, 254 nm); major enantiomer  $t_r = 13.800$  min, minor enantiomer  $t_r = 15.075$  min..

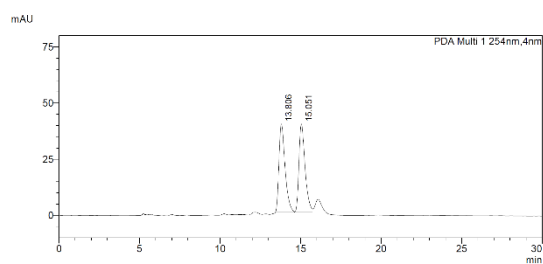

<Peak Table>  
PDA Ch1 254nm

| Peak# | Ret. Time | Height | Height% | Area    | Area%   |
|-------|-----------|--------|---------|---------|---------|
| 1     | 13.806    | 39336  | 49.866  | 1040769 | 50.028  |
| 2     | 15.051    | 39390  | 50.034  | 1039590 | 49.972  |
| Total |           | 78726  | 100.000 | 2080359 | 100.000 |

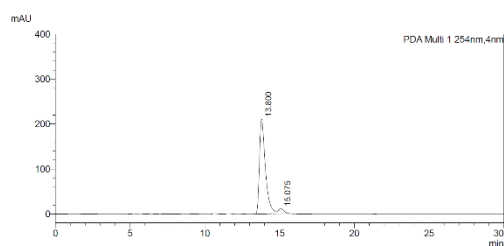

<Peak Table>  
PDA Ch1 254nm

| Peak# | Ret. Time | Height | Height% | Area    | Area%   |
|-------|-----------|--------|---------|---------|---------|
| 1     | 13.800    | 210524 | 94.878  | 5817507 | 95.059  |
| 2     | 15.075    | 11366  | 5.122   | 302367  | 4.941   |
| Total |           | 221890 | 100.000 | 6119874 | 100.000 |

### 4.3.8 Synthesis of (*R*)-2-cinnamyl-3,3-bis(2-methoxybenzyl)tetrahydrofuran (**10h**)

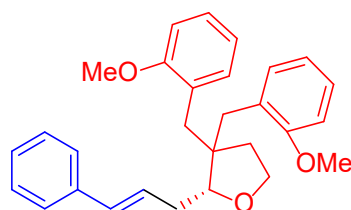

**10h**

Prepared according to typical procedure at  $-20\text{ }^{\circ}\text{C}$  for 72 hours by using  $[\text{Pd}(\text{allyl})\text{Cl}]_2$  (2.5 mol%), **Xu9** (10 mol%) from  $\gamma$ -hydroxyalkenes (0.5 mmol) and alkenyl bromide (1 mmol), after flash column chromatography on a silica gel (petroleum ether: ethyl acetate = 50: 1) give the product **10h** as a white liquid (133 mg, 62% yield) with 90% *ee*.  $[\alpha]_{\text{D}}^{20} = 61.6$  ( $c = 0.4$ , Chloroform).  $^1\text{H}$  NMR (400 MHz, Chloroform-*d*)  $\delta$  7.40 – 7.33 (m, 2H), 7.31 – 7.22 (m, 3H), 7.22 – 7.14 (m, 3H), 6.96 – 6.86 (m, 3H), 6.81 (ddd,  $J = 8.3, 4.3, 1.1$  Hz, 2H), 6.53 (d,  $J = 15.9$  Hz, 1H), 6.34 (dt,  $J = 15.8, 6.7$  Hz, 1H), 4.04 (dt,  $J = 9.4, 7.4$  Hz, 1H), 3.80 (s, 3H), 3.75 (s, 3H), 3.64 (ddd,  $J = 10.0, 7.7, 2.4$  Hz, 1H), 3.52 (dd,  $J = 10.2, 1.6$  Hz, 1H), 2.98 (dd,  $J = 15.0, 13.4$  Hz, 2H), 2.80 (ddt,  $J = 14.8, 6.6, 1.7$  Hz, 1H), 2.74 – 2.59 (m, 2H), 2.47 (dddd,  $J = 15.0, 10.2, 6.8, 1.4$  Hz, 1H), 1.76 (ddd,  $J = 12.6, 7.2, 2.4$  Hz, 1H), 1.67 – 1.60 (m, 1H).  $^{13}\text{C}$  NMR (100 MHz, Chloroform-*d*)  $\delta$  158.4, 158.2, 137.9, 133.2, 133.0, 130.9, 129.2, 128.4, 127.6, 127.5, 127.5, 126.8, 126.2, 126.1, 120.1, 119.9, 110.5, 110.1, 82.9, 65.5, 55.1, 49.0, 33.4, 32.9, 32.2, 31.3. HRMS (ESI) calculated for  $[\text{C}_{29}\text{H}_{32}\text{NaO}_3]$   $[\text{M}+\text{Na}]^+$ : 451.2244 found: 451.2255. Enantiomeric excess was determined by HPLC with a Chiralpak OD-H column (hexanes: 2-propanol = 97: 3, 0.6 mL/min, 254 nm); major enantiomer  $t_r = 29.578$  min, minor enantiomer  $t_r = 33.929$  min.

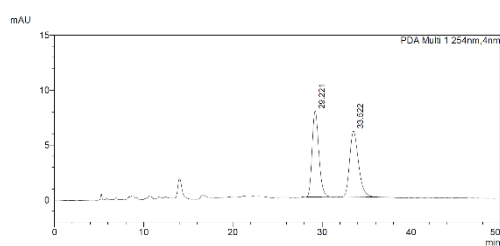

| <Peak Table>  |           |        |         |        |
|---------------|-----------|--------|---------|--------|
| PDA Ch1 254nm |           |        |         |        |
| Peak#         | Ret. Time | Height | Height% | Area   |
| 1             | 29.221    | 7816   | 56.928  | 406769 |
| 2             | 33.522    | 5967   | 43.372  | 411633 |
| Total         |           | 13803  | 100.000 | 820402 |

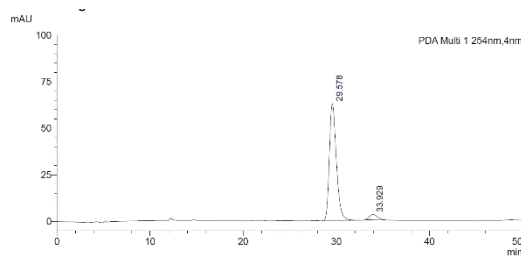

| <Peak Table>  |           |        |         |         |
|---------------|-----------|--------|---------|---------|
| PDA Ch1 254nm |           |        |         |         |
| Peak#         | Ret. Time | Height | Height% | Area    |
| 1             | 29.578    | 62662  | 95.659  | 3272914 |
| 2             | 33.929    | 2843   | 4.341   | 174688  |
| Total         |           | 65506  | 100.000 | 3447603 |

### 4.3.9 Synthesis of (*R*)-3,3-diallyl-2-cinnamyltetrahydrofuran (**10i**)

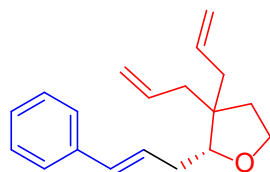

**10i**

Prepared according to typical procedure at -20 °C for 72 hours by using [Pd(allyl)Cl]<sub>2</sub> (2.5 mol%), **Xu9** (10 mol%) from  $\gamma$ -hydroxyalkenes (0.5 mmol) and alkenyl bromide (1 mmol), after flash column chromatography on a silica gel (petroleum ether: ethyl acetate = 50: 1) give the product **10i** as a white liquid (95 mg, 71% yield) with 90% *ee*.  $[\alpha]_D^{20} = 15.4$  ( $c = 0.4$ , Chloroform). <sup>1</sup>H NMR (400 MHz, Chloroform-*d*)  $\delta$  7.37 – 7.33 (m, 2H), 7.30 – 7.25 (m, 2H), 7.22 – 7.11 (m, 1H), 6.52 – 6.38 (m, 1H), 6.29 (dt,  $J = 15.8, 6.9$  Hz, 1H), 5.84 (tddd,  $J = 17.6, 14.4, 9.3, 7.2$  Hz, 2H), 5.16 – 5.04 (m, 4H), 3.89 (td,  $J = 8.3, 6.5$  Hz, 1H), 3.81 – 3.70 (m, 1H), 3.65 (dd,  $J = 8.1, 4.9$  Hz, 1H), 2.44 – 2.32 (m, 2H), 2.24 – 2.12 (m, 4H), 1.93 – 1.82 (m, 1H), 1.81 – 1.72 (m, 1H). <sup>13</sup>C NMR (100MHz, Chloroform-*d*)  $\delta$  137.6, 135.1, 134.5, 131.4, 128.4, 128.0, 127.0, 126.1, 126.1, 118.0, 117.7, 85.2, 65.5, 46.7, 40.9, 37.7, 35.5, 34.1. HRMS (ESI) calculated for [C<sub>19</sub>H<sub>24</sub>NaO] [M+Na]<sup>+</sup>: 291.1719 found: 291.1717. Enantiomeric excess was determined by HPLC with a Chiralpak OD-H column (hexanes: 2-propanol = 95: 5, 0.6 mL/min, 254 nm); major enantiomer *tr* = 8.483 min, minor enantiomer *tr* = 16.925 min.

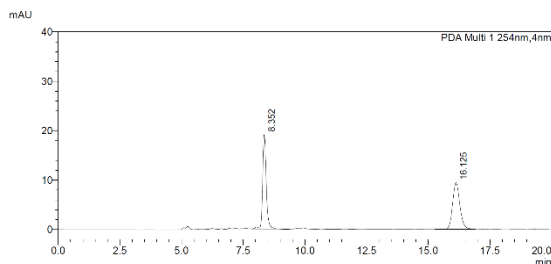

| <Peak Table>  |           |        |         |        |
|---------------|-----------|--------|---------|--------|
| PDA Ch1 254nm |           |        |         |        |
| Peak#         | Ret. Time | Height | Height% | Area   |
| 1             | 8.352     | 19102  | 66.971  | 189661 |
| 2             | 16.125    | 9421   | 33.029  | 189118 |
| Total         |           | 28523  | 100.000 | 378779 |

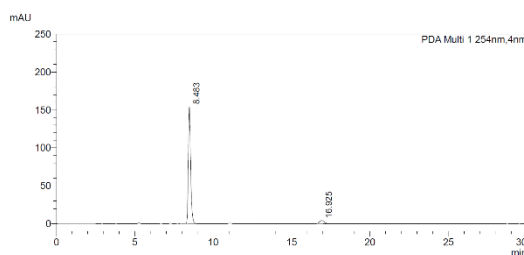

| <Peak Table>  |           |        |         |         |
|---------------|-----------|--------|---------|---------|
| PDA Ch1 254nm |           |        |         |         |
| Peak#         | Ret. Time | Height | Height% | Area    |
| 1             | 8.483     | 153914 | 97.435  | 1616107 |
| 2             | 16.925    | 4051   | 2.565   | 83379   |
| Total         |           | 157966 | 100.000 | 1699486 |

### 4.3.10 Synthesis of (*R*)-2-cinnamyl-3,3-diphenyltetrahydrofuran (**10j**)

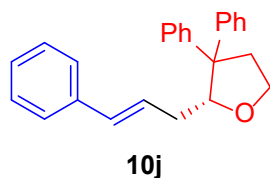

Prepared according to typical procedure at -20 °C for 72 hours by using [Pd(allyl)Cl]<sub>2</sub> (2.5 mol%), **Xu9** (10 mol%) from  $\gamma$ -hydroxyalkenes (0.5 mmol) and alkenyl bromide (1 mmol), after flash column chromatography on a silica gel (petroleum ether: ethyl acetate = 50: 1) give the product **10j** as a white liquid (119 mg, 71% yield) with 91% *ee*.  $[\alpha]_D^{20} = 110.4$  ( $c = 0.4$ , Chloroform). <sup>1</sup>H NMR (400 MHz, Chloroform-*d*)  $\delta$  7.32 – 7.25 (m, 9H), 7.23 – 7.13 (m, 4H), 7.11 – 7.06 (m, 2H), 6.28 – 6.18 (m, 2H), 4.68 (dd,  $J = 9.6, 2.8$  Hz, 1H), 4.19 (td,  $J = 8.7, 3.3$  Hz, 1H), 3.82 (q,  $J = 8.4$  Hz, 1H), 2.94 (dt,  $J = 12.4, 8.8$  Hz, 1H), 2.30 (ddd,  $J = 12.3, 7.9, 3.4$  Hz, 1H), 2.22 – 2.10 (m, 1H), 1.85 (ddd,  $J = 14.2, 9.6, 4.9$  Hz, 1H). <sup>13</sup>C NMR (100 MHz, Chloroform-*d*)  $\delta$  147.5, 145.0, 137.7, 131.5, 128.8, 128.6, 128.5, 128.3, 128.2, 128.1, 128.1, 127.9, 127.8, 127.0, 126.5, 126.3, 126.1, 84.1, 66.0, 58.2, 39.2, 37.1. HRMS (ESI) calculated for [C<sub>25</sub>H<sub>24</sub>NaO] [M+Na]<sup>+</sup>: 363.1719 found: 363.1712. Enantiomeric excess was determined by HPLC with a Chiralpak OD-H column (hexanes: 2-propanol = 95: 5, 0.6 mL/min, 254 nm); major enantiomer *tr* = 10.471 min, minor enantiomer *tr* = 18.737 min.

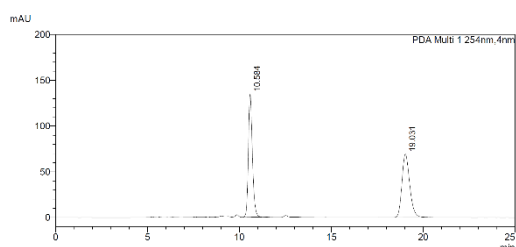

<Peak Table>

| Peak# | Ret. Time | Height | Height% | Area    | Area%   |
|-------|-----------|--------|---------|---------|---------|
| 1     | 10.584    | 134501 | 85.990  | 2072740 | 50.559  |
| 2     | 18.031    | 89318  | 34.010  | 2026878 | 49.441  |
| Total |           | 203819 | 100.000 | 4099618 | 100.000 |

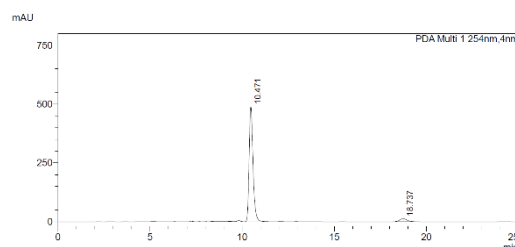

<Peak Table>

| Peak# | Ret. Time | Height | Height% | Area    | Area%   |
|-------|-----------|--------|---------|---------|---------|
| 1     | 10.471    | 489109 | 97.569  | 7129223 | 95.618  |
| 2     | 18.737    | 12189  | 2.431   | 326737  | 4.382   |
| Total |           | 501298 | 100.000 | 7455960 | 100.000 |

#### 4.3.11 Synthesis of (*R*)-2-cinnamyl-3,3-dimethyltetrahydrofuran (**10k**)

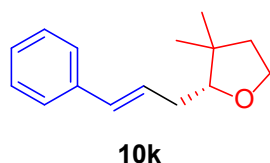

Prepared according to typical procedure at -20 °C for 72 hours by using [Pd(allyl)Cl]<sub>2</sub> (2.5 mol%), **Xu9** (10 mol%) from  $\gamma$ -hydroxyalkenes (0.5 mmol) and alkenyl bromide (1 mmol), after flash column chromatography on a silica gel (petroleum ether: ethyl acetate = 50: 1) give the product **10k**

as a white liquid (72 mg, 67% yield) with 90% *ee*.  $[\alpha]_D^{20} = 23.8$  ( $c = 0.4$ , Chloroform).  $^1\text{H}$  NMR (400 MHz, Chloroform-*d*)  $\delta$  7.37 – 7.32 (m, 2H), 7.31 – 7.23 (m, 2H), 7.21 – 7.14 (m, 1H), 6.47 (dt,  $J = 15.9, 1.5$  Hz, 1H), 6.29 (dt,  $J = 15.8, 7.0$  Hz, 1H), 3.90 (q,  $J = 8.1$  Hz, 1H), 3.80 (td,  $J = 8.7, 4.6$  Hz, 1H), 3.46 (dd,  $J = 7.6, 5.3$  Hz, 1H), 2.32 (tt,  $J = 7.0, 1.3$  Hz, 2H), 1.84 – 1.68 (m, 2H), 1.07 (s, 3H), 0.97 (s, 3H).  $^{13}\text{C}$  NMR (100 MHz, Chloroform-*d*)  $\delta$  137.7, 131.3, 128.4, 128.1, 126.9, 126.1, 86.6, 65.4, 41.4, 40.5, 34.0, 25.5, 21.7. HRMS (ESI) calculated for  $[\text{C}_{15}\text{H}_{20}\text{NaO}] [\text{M}+\text{Na}]^+$ : 239.1406 found: 239.1409. Enantiomeric excess was determined by HPLC with a Chiralpak OD-H column (hexanes: 2-propanol = 95: 5, 0.6 mL/min, 254 nm); major enantiomer  $t_r = 8.520$  min, minor enantiomer  $t_r = 13.746$  min.

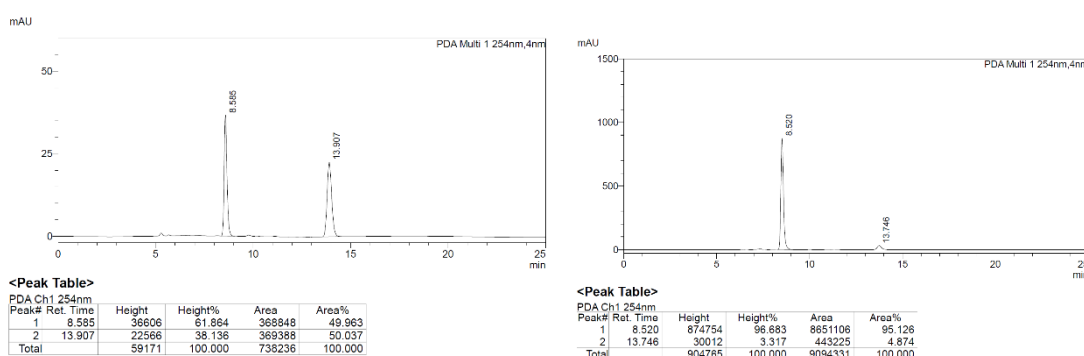

#### 4.3.12 Synthesis of (*R*)-2-cinnamyl-3,3-diethyltetrahydrofuran (**10I**)

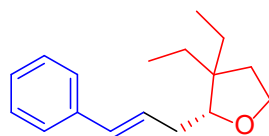

**10I**

Prepared according to typical procedure at  $-20$  °C for 72 hours by using  $[\text{Pd}(\text{allyl})\text{Cl}]_2$  (2.5 mol%), **Xu9** (10 mol%) from  $\gamma$ -hydroxyalkenes (0.5 mmol) and alkenyl bromide (1 mmol), after flash column chromatography on a silica gel (petroleum ether: ethyl acetate = 50: 1) give the product **10I** as a white liquid (84 mg, 69% yield) with 88% *ee*.  $[\alpha]_D^{20} = 34.9$  ( $c = 0.4$ , Chloroform).  $^1\text{H}$  NMR (400 MHz, Chloroform-*d*)  $\delta$  7.39 – 7.31 (m, 2H), 7.26 (t,  $J = 7.7$  Hz, 2H), 7.19 – 7.12 (m, 1H), 6.44 (d,  $J = 15.9$  Hz, 1H), 6.32 (dt,  $J = 15.8, 6.8$  Hz, 1H), 3.87 (td,  $J = 8.3, 5.8$  Hz, 1H), 3.73 (td,  $J = 8.4, 6.6$  Hz, 1H), 3.62 (dd,  $J = 7.7, 5.3$  Hz, 1H), 2.33 (td,  $J = 7.1, 6.6, 1.5$  Hz, 2H), 1.73 (dddd,  $J = 33.5, 12.4, 8.4, 6.1$  Hz, 2H), 1.50 – 1.34 (m, 4H), 0.88 (dt,  $J = 9.2, 7.5$  Hz, 6H).  $^{13}\text{C}$  NMR (100 MHz, Chloroform-*d*)  $\delta$  137.7, 131.2, 128.5, 128.4, 126.9, 126.1, 85.7, 65.6, 47.1, 36.1, 34.7, 28.3, 24.5, 9.1, 9.0. HRMS (ESI) calculated for  $[\text{C}_{17}\text{H}_{24}\text{NaO}] [\text{M}+\text{Na}]^+$ : 267.1719 found: 267.1721.

Enantiomeric excess was determined by HPLC with a Chiralpak OD-H column (hexanes: 2-propanol = 95: 5, 0.6 mL/min, 254 nm); major enantiomer  $t_r$  = 8.175 min, minor enantiomer  $t_r$  = 12.139 min..

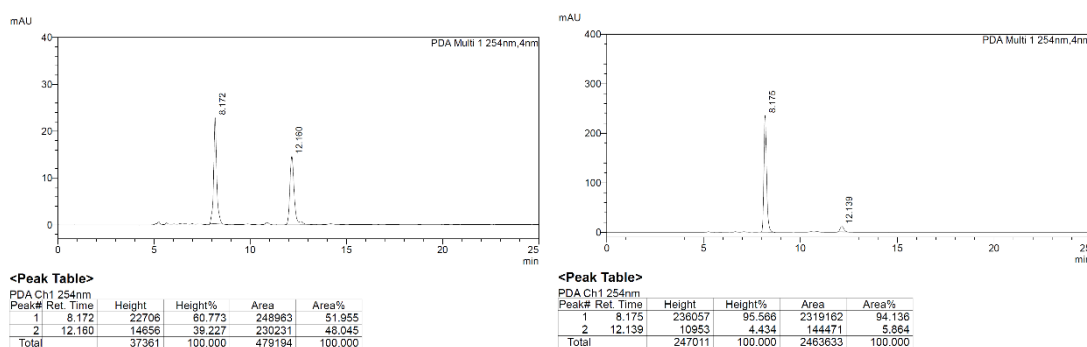

### 4.3.13 Synthesis of (*R*)-1-cinnamyl-2-oxaspiro[4.4]nonane (**10m**)

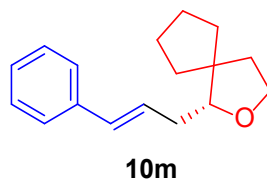

Prepared according to typical procedure at -20 °C for 72 hours by using [Pd(allyl)Cl]<sub>2</sub> (2.5 mol%), **Xu9** (10 mol%) from  $\gamma$ -hydroxyalkenes (0.5 mmol) and alkenyl bromide (1 mmol), after flash column chromatography on a silica gel (petroleum ether: ethyl acetate = 50: 1) give the product **10m** as a white liquid (79 mg, 65% yield) with 85% *ee*.  $[\alpha]_D^{20} = 31.3$  ( $c = 0.4$ , Chloroform). <sup>1</sup>H NMR (400 MHz, Chloroform-*d*)  $\delta$  7.37 – 7.32 (m, 2H), 7.26 (dd,  $J = 8.4, 6.8$  Hz, 2H), 7.20 – 7.12 (m, 1H), 6.55 – 6.39 (m, 1H), 6.30 (dt,  $J = 15.8, 6.9$  Hz, 1H), 3.84 (dtd,  $J = 27.5, 8.2, 6.4$  Hz, 2H), 3.70 (dd,  $J = 7.3, 5.5$  Hz, 1H), 2.33 (td,  $J = 6.3, 5.6, 1.5$  Hz, 2H), 1.79 (qdd,  $J = 12.0, 7.8, 6.4$  Hz, 2H), 1.64 (dddd,  $J = 8.5, 7.2, 4.9, 3.7, 2.0$  Hz, 5H), 1.59 – 1.52 (m, 2H), 1.38 (tq,  $J = 5.5, 2.4$  Hz, 1H). <sup>13</sup>C NMR (100 MHz, Chloroform-*d*)  $\delta$  137.7, 131.4, 128.4, 128.1, 126.9, 126.1, 84.9, 66.0, 52.6, 39.8, 36.5, 35.2, 32.2, 24.9, 24.0. HRMS (ESI) calculated for [C<sub>17</sub>H<sub>22</sub>NaO] [M+Na]<sup>+</sup>: 265.1563 found: 265.1566. Enantiomeric excess was determined by HPLC with a Chiralpak OD-H column (hexanes: 2-propanol = 95: 5, 0.6 mL/min, 254 nm); major enantiomer  $t_r$  = 9.612 min, minor enantiomer  $t_r$  = 16.531 min.

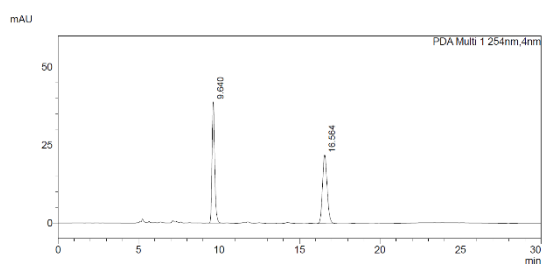

<Peak Table>  
PDA Ch1 254nm

| Peak# | Ret. Time | Height | Height% | Area   | Area%   |
|-------|-----------|--------|---------|--------|---------|
| 1     | 9.640     | 38913  | 63.852  | 444762 | 50.176  |
| 2     | 16.564    | 22030  | 36.148  | 441605 | 49.822  |
| Total |           | 60943  | 100.000 | 886367 | 100.000 |

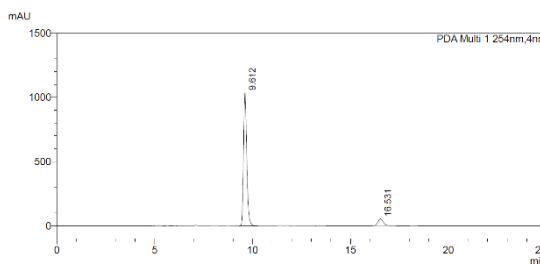

<Peak Table>  
PDA Ch1 254nm

| Peak# | Ret. Time | Height  | Height% | Area     | Area%   |
|-------|-----------|---------|---------|----------|---------|
| 1     | 9.612     | 1034020 | 95.316  | 11820743 | 92.597  |
| 2     | 16.531    | 50814   | 4.684   | 945084   | 7.403   |
| Total |           | 1084834 | 100.000 | 12765827 | 100.000 |

#### 4.3.14 Synthesis of (*R*)-1-cinnamyl-2-oxaspiro[4.5]decane (**10n**)

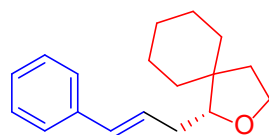

**10n**

Prepared according to typical procedure at -20 °C for 72 hours by using [Pd(allyl)Cl]<sub>2</sub> (2.5 mol%), **Xu9** (10 mol%) from  $\gamma$ -hydroxyalkenes (0.5 mmol) and alkenyl bromide (1 mmol), after flash column chromatography on a silica gel (petroleum ether: ethyl acetate = 50: 1) give the product **10n** as a white liquid (86 mg, 67% yield) with 87% *ee*.  $[\alpha]_D^{20} = 33.7$  ( $c = 0.4$ , Chloroform). <sup>1</sup>H NMR (400 MHz, Chloroform-*d*)  $\delta$  7.40 – 7.31 (m, 2H), 7.26 (dd,  $J = 8.5, 6.8$  Hz, 2H), 7.21 – 7.11 (m, 1H), 6.51 – 6.41 (m, 1H), 6.31 (dt,  $J = 15.8, 6.9$  Hz, 1H), 3.90 (td,  $J = 8.3, 6.5$  Hz, 1H), 3.76 (td,  $J = 8.7, 5.9$  Hz, 1H), 3.44 (dd,  $J = 7.2, 5.8$  Hz, 1H), 2.32 (td,  $J = 6.3, 5.7, 1.4$  Hz, 2H), 1.95 (ddd,  $J = 12.4, 8.2, 5.9$  Hz, 1H), 1.70 – 1.57 (m, 4H), 1.50 – 1.41 (m, 1H), 1.40 – 1.32 (m, 4H), 1.31 – 1.13 (m, 2H). <sup>13</sup>C NMR (100 MHz, Chloroform-*d*)  $\delta$  137.7, 131.3, 128.4, 126.9, 126.1, 87.3, 65.7, 44.8, 35.7, 35.4, 33.9, 30.3, 26.5, 24.0, 23.0. HRMS (ESI) calculated for [C<sub>18</sub>H<sub>24</sub>NaO] [M+Na]<sup>+</sup>: 279.1719 found: 279.1720. Enantiomeric excess was determined by HPLC with a Chiralpak OD-H column (hexanes: 2-propanol = 95: 5, 0.6 mL/min, 254 nm); major enantiomer *tr* = 9.748 min, minor enantiomer *tr* = 21.555 min.

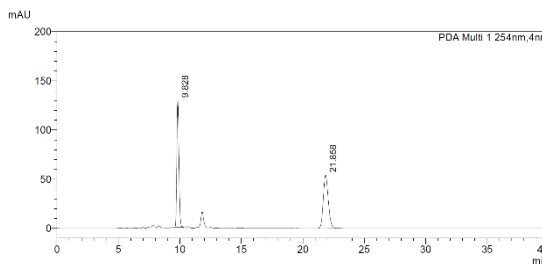

<Peak Table>  
PDA Ch1 254nm

| Peak# | Ret. Time | Height | Height% | Area    | Area%   |
|-------|-----------|--------|---------|---------|---------|
| 1     | 9.828     | 129058 | 70.296  | 1524000 | 49.767  |
| 2     | 21.858    | 54535  | 29.704  | 1538260 | 50.233  |
| Total |           | 183593 | 100.000 | 3062260 | 100.000 |

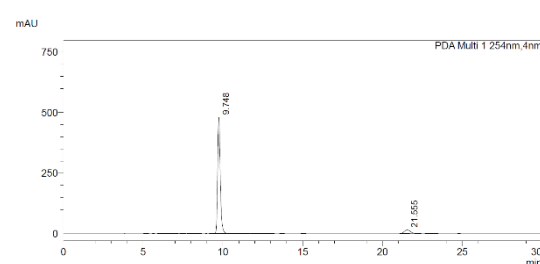

<Peak Table>  
PDA Ch1 254nm

| Peak# | Ret. Time | Height | Height% | Area    | Area%   |
|-------|-----------|--------|---------|---------|---------|
| 1     | 9.748     | 480932 | 96.987  | 5579582 | 93.556  |
| 2     | 21.555    | 14943  | 3.013   | 384333  | 6.444   |
| Total |           | 495875 | 100.000 | 5963916 | 100.000 |

### 4.3.15 Synthesis of (*R*)-2-cinnamyl-4,4-dimethyltetrahydrofuran (**10o**)

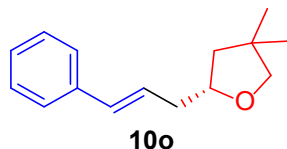

Prepared according to typical procedure at 0 °C for 72 hours by using [Pd(allyl)Cl]<sub>2</sub> (2.5 mol%), **Xu9** (10 mol%) from  $\gamma$ -hydroxyalkenes (0.5 mmol) and alkenyl bromide (1 mmol), after flash column chromatography on a silica gel (petroleum ether: ethyl acetate = 50: 1) give the product **10o** as a white liquid (78 mg, 72% yield) with 87% *ee*.  $[\alpha]_D^{20} = -4.3$  (*c* = 0.4, Chloroform). <sup>1</sup>H NMR (400 MHz, Chloroform-*d*)  $\delta$  7.37 – 7.32 (m, 2H), 7.28 (dd, *J* = 8.5, 6.8 Hz, 2H), 7.22 – 7.16 (m, 1H), 6.45 (dt, *J* = 15.9, 1.4 Hz, 1H), 6.22 (dt, *J* = 15.8, 7.1 Hz, 1H), 4.13 (dq, *J* = 9.0, 6.4 Hz, 1H), 3.55 (d, *J* = 8.1 Hz, 1H), 3.47 (d, *J* = 8.1 Hz, 1H), 2.53 (dtd, *J* = 13.6, 6.7, 1.4 Hz, 1H), 2.41 (dddd, *J* = 14.0, 7.4, 6.2, 1.4 Hz, 1H), 1.80 (dd, *J* = 12.2, 6.5 Hz, 1H), 1.44 (dd, *J* = 12.3, 9.0 Hz, 1H), 1.10 (d, *J* = 3.6 Hz, 6H). <sup>13</sup>C NMR (100 MHz, Chloroform-*d*)  $\delta$  137.6, 132.0, 128.5, 127.0, 126.7, 126.1, 80.2, 78.9, 46.4, 39.8, 39.7, 26.9, 26.6. HRMS (ESI) calculated for [C<sub>15</sub>H<sub>20</sub>NaO] [M+Na]<sup>+</sup>: 239.1406 found: 239.1412. Enantiomeric excess was determined by HPLC with a Chiralpak OD-H column (hexanes: 2-propanol = 95: 5, 0.6 mL/min, 254 nm); major enantiomer *tr* = 7.962 min, minor enantiomer *tr* = 8.298 min.

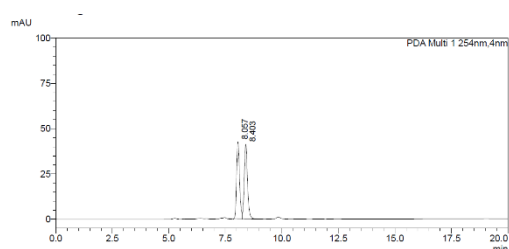

| <Peak Table> |           |        |         |        |
|--------------|-----------|--------|---------|--------|
| Peak#        | Ret. Time | Height | Height% | Area   |
| 1            | 8.057     | 42410  | 50.693  | 383037 |
| 2            | 8.403     | 41249  | 49.307  | 406000 |
| Total        |           | 83659  | 100.000 | 789036 |

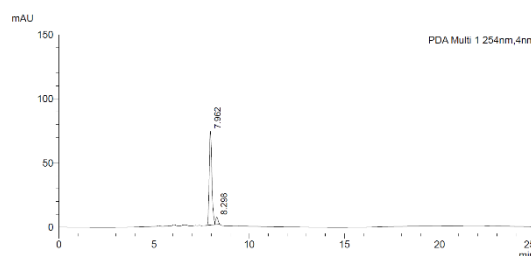

| <Peak Table> |           |        |         |        |
|--------------|-----------|--------|---------|--------|
| Peak#        | Ret. Time | Height | Height% | Area   |
| 1            | 7.962     | 73064  | 92.824  | 692291 |
| 2            | 8.298     | 5648   | 7.176   | 48511  |
| Total        |           | 78712  | 100.000 | 740802 |

### 4.3.16 Synthesis of (*R*)-7-cinnamyl-6-oxaspiro[3.4]octane (**10p**)

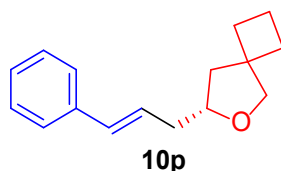

Prepared according to typical procedure at 0 °C for 72 hours by using [Pd(allyl)Cl]<sub>2</sub> (2.5 mol%), **Xu9** (10 mol%) from  $\gamma$ -hydroxyalkenes (0.5 mmol) and alkenyl bromide (1 mmol), after flash column chromatography on a silica gel (petroleum ether: ethyl acetate = 50: 1) give the product **10p**



as a white liquid (84 mg, 74% yield) with 82% *ee*.  $[\alpha]_D^{20} = -7.9$  ( $c = 0.4$ , Chloroform).  $^1\text{H}$  NMR (400 MHz, Chloroform-*d*)  $\delta$  7.37 – 7.32 (m, 2H), 7.28 (dd,  $J = 8.5, 6.8$  Hz, 2H), 7.22 – 7.16 (m, 1H), 6.44 (dt,  $J = 15.9, 1.4$  Hz, 1H), 6.21 (dt,  $J = 15.9, 7.2$  Hz, 1H), 4.01 (dq,  $J = 8.4, 6.2$  Hz, 1H), 3.80 (d,  $J = 8.4$  Hz, 1H), 3.73 (d,  $J = 8.4$  Hz, 1H), 2.49 (dddd,  $J = 13.5, 7.3, 6.3, 1.4$  Hz, 1H), 2.39 (dddd,  $J = 14.0, 7.4, 6.2, 1.4$  Hz, 1H), 2.12 – 1.95 (m, 5H), 1.91 – 1.79 (m, 2H), 1.69 – 1.60 (m, 1H).  $^{13}\text{C}$  NMR (100 MHz, Chloroform-*d*)  $\delta$  137.6, 132.0, 128.5, 127.0, 126.7, 126.1, 79.1, 78.4, 46.2, 44.8, 39.5, 33.1, 31.5, 16.5. HRMS (ESI) calculated for  $[\text{C}_{16}\text{H}_{20}\text{NaO}]$   $[\text{M}+\text{Na}]^+$ : 251.1406 found: 251.1412. Enantiomeric excess was determined by HPLC with a Chiralpak OD-H column (hexanes: 2-propanol = 95: 5, 0.6 mL/min, 254 nm); major enantiomer  $t_r = 9.276$  min, minor enantiomer  $t_r = 8.883$  min.

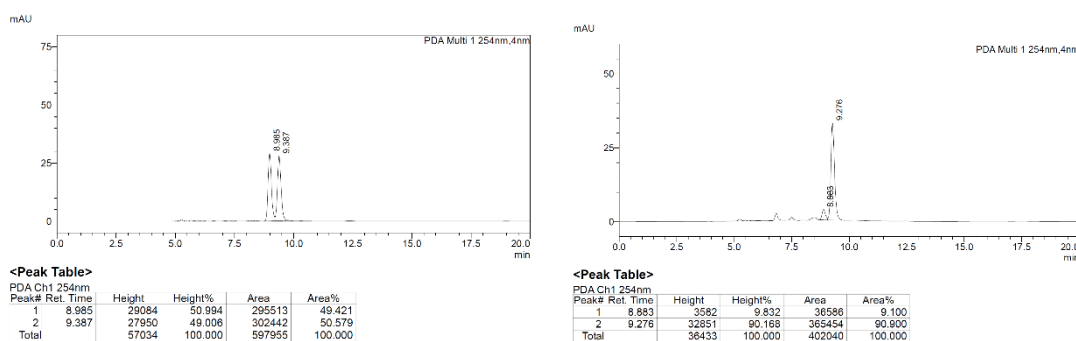

#### 4.3.17 Synthesis of (*S*)-2-cinnamyl-2-methyltetrahydrofuran (**10q**)

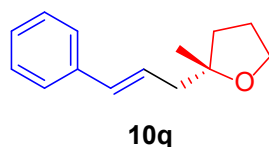

Prepared according to typical procedure at 0 °C for 72 hours by using  $[\text{Pd}(\text{allyl})\text{Cl}]_2$  (2.5 mol%), **Xu9** (10 mol%) from  $\gamma$ -hydroxyalkenes (0.5 mmol) and alkenyl bromide (1 mmol), after flash column chromatography on a silica gel (petroleum ether: ethyl acetate = 50: 1) give the product **10q** as a white liquid (70 mg, 69% yield) with 81% *ee*.  $[\alpha]_D^{20} = 7.0$  ( $c = 0.4$ , Chloroform).  $^1\text{H}$  NMR (400 MHz, Chloroform-*d*)  $\delta$  7.39 – 7.33 (m, 2H), 7.29 (dd,  $J = 8.5, 6.8$  Hz, 2H), 7.22 – 7.16 (m, 1H), 6.51 – 6.37 (m, 1H), 6.25 (dt,  $J = 15.8, 7.3$  Hz, 1H), 3.93 – 3.76 (m, 2H), 2.41 (dd,  $J = 7.4, 1.2$  Hz, 2H), 1.99 – 1.79 (m, 3H), 1.65 (ddd,  $J = 11.6, 5.6, 2.6$  Hz, 1H), 1.23 (s, 3H).  $^{13}\text{C}$  NMR (100 MHz, Chloroform-*d*)  $\delta$  137.7, 132.5, 128.5, 127.0, 126.8, 126.1, 82.6, 67.5, 44.9, 36.3, 26.3, 26.2. **HRMS** (ESI) calculated for  $[\text{C}_{14}\text{H}_{18}\text{NaO}]$   $[\text{M}+\text{Na}]^+$ : 225.1250 found: 225.1255. Enantiomeric excess was

determined by HPLC with a Chiralpak OD-H column (hexanes: 2-propanol = 99: 1, 0.5 mL/min, 254 nm); major enantiomer  $t_r$  = 13.055 min, minor enantiomer  $t_r$  = 17.859 min.

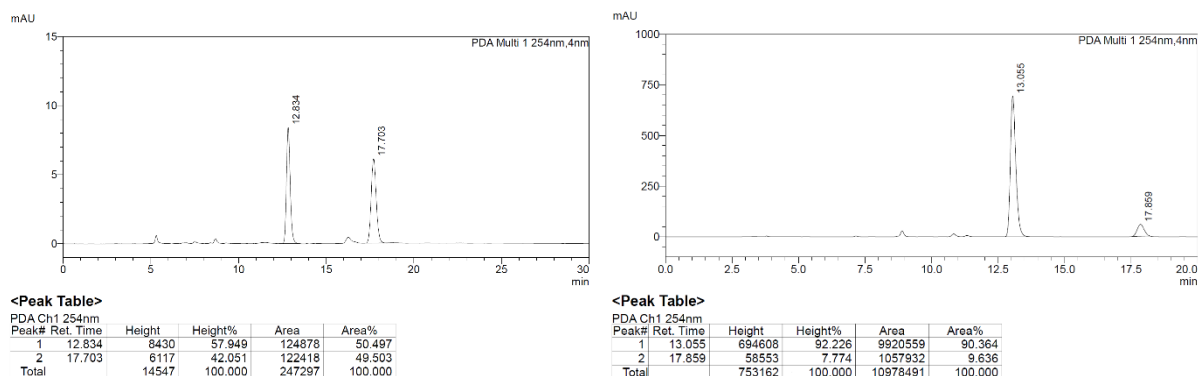

#### 4.4 (*S*, *Z*)-2-(3-phenylallyl)-1-oxaspiro[4.5]decane (*Z*-3b)

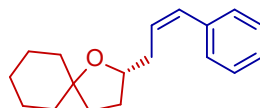

**Z-3b**

Prepared according to typical procedure at RT for 72 hours by using  $[\text{Pd}(\text{allyl})\text{Cl}]_2$  (5 mol%), **Xu2** (20 mol%) from  $\gamma$ -hydroxyalkenes (0.2 mmol) and alkenyl bromide (0.4 mmol), after flash column chromatography on a silica gel (petroleum ether: ethyl acetate = 80: 1) give the product **Z-3b** as a white liquid (29 mg, 57% yield) with 88% *ee*.  $[\alpha]_D^{20} = -34.9$  ( $c = 0.4$ , Chloroform).  $^1\text{H}$  NMR (400 MHz, Chloroform-*d*)  $\delta$  7.34 – 7.28 (m, 4H), 7.21 (ddd,  $J = 6.7, 5.7, 2.6$  Hz, 1H), 6.50 (dt,  $J = 11.7, 1.7$  Hz, 1H), 5.73 (dt,  $J = 11.8, 7.2$  Hz, 1H), 4.05 (dq,  $J = 12.4, 6.2$  Hz, 1H), 2.73 – 2.59 (m, 1H), 2.49 (dtd,  $J = 8.6, 6.9, 1.8$  Hz, 1H), 2.04 – 1.92 (m, 1H), 1.75 – 1.62 (m, 4H), 1.57 – 1.42 (m, 5H), 1.42 – 1.23 (m, 4H).  $^{13}\text{C}$  NMR (100 MHz, Chloroform-*d*)  $\delta$  137.6, 130.3, 128.8, 128.7, 128.1, 126.5, 100.0, 82.8, 38.5, 37.6, 35.8, 35.3, 31.0, 25.7, 24.2, 23.8. HRMS (ESI) calculated for  $[\text{C}_{18}\text{H}_{24}\text{NaO}]$   $[\text{M}+\text{Na}]^+$ : 279.1720 found: 279.1719. Enantiomeric excess was determined by HPLC with a Chiralpak ADH+ADH column (hexanes: 2-propanol = 99: 1, 0.6 mL/min, 254 nm); major enantiomer  $t_r$  = 13.126. min, minor enantiomer  $t_r$  = 12.777 min.

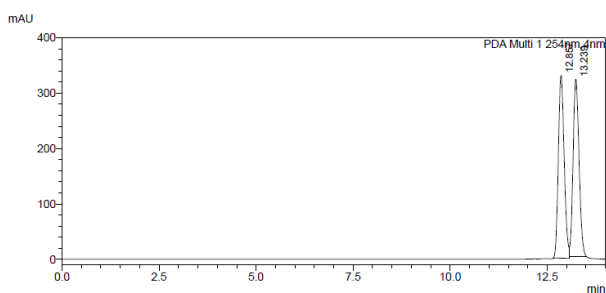

<Peak Table>

| Peak# | Ret. Time | Height | Height% | Area    | Area%   |
|-------|-----------|--------|---------|---------|---------|
| 1     | 12.857    | 330006 | 50.706  | 3461776 | 50.357  |
| 2     | 13.239    | 320813 | 49.294  | 3412760 | 49.643  |
| Total |           | 650819 | 100.000 | 6874536 | 100.000 |

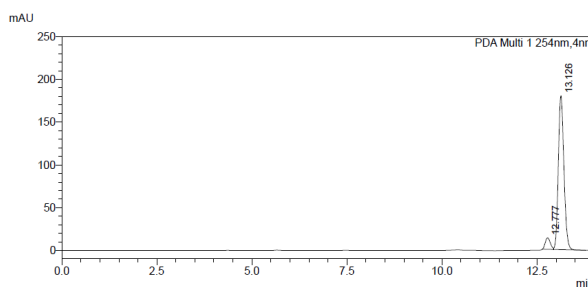

<Peak Table>

| Peak# | Ret. Time | Height | Height% | Area    | Area%   |
|-------|-----------|--------|---------|---------|---------|
| 1     | 12.777    | 13371  | 6.919   | 123072  | 6.266   |
| 2     | 13.126    | 179866 | 93.081  | 1841196 | 93.734  |
| Total |           | 193237 | 100.000 | 1964269 | 100.000 |

## 4.5 Gram-scale synthesis of **6c**:

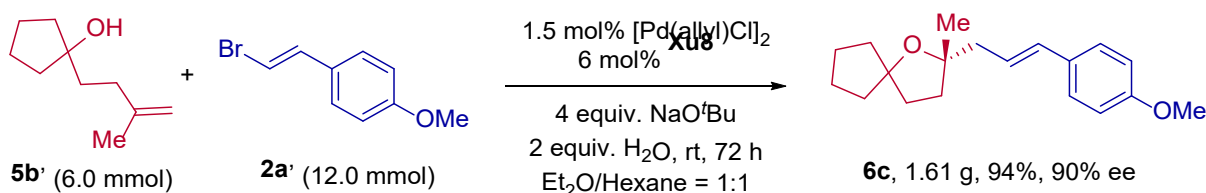

To a 100 mL tube was added  $[Pd(allyl)Cl]_2$  (0.09 mmol, 32.9 mg, 1.5 mol%), **Xu8** (0.36 mmol, 234.8 mg, 6 mol%). The flask was evacuated and refilled with argon. Then tertiary  $\gamma$ -hydroxyalkenes **5b** (6 mmol), alkenyl halides **2a** (12 mmol), NaO<sup>t</sup>Bu (24 mmol, 2.3g, 4.0 equiv.), H<sub>2</sub>O (12 mmol, 324 mg, 2.0 equiv.) and a mixed solution of Et<sub>2</sub>O/Hexane (1: 1, 60 mL) was added to the tube, and stirred at room temperature for 72 hours. After the reaction was complete (monitored by TLC), solvent was removed under reduced pressure. The crude product was then purified by flash column chromatography on silica gel to afford the desired product **6c** (1.61g, 94%, 90% ee).

## 4.6 Procedure for synthetic applications

### 4.6.1 (*R*)-2-(3-(4-methoxyphenyl)propyl)-2-methyl-1-oxaspiro[4.4]nonane (**11**)

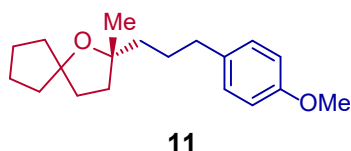

To a solution of (*S*)-**5c** (0.1 mmol, 52.2 mg) in MeOH (1 mL) was added 10% Pd/C (1 mol%, 1 mg) at room temperature. The reaction flask was evacuated twice under reduced pressure, and a H<sub>2</sub>

balloon was placed on the top. After stirring at room temperature for 3.5 h, the mixture was concentrated and the residue was purified by column chromatography on a silica gel column(hexanes/EtOAc=80/1) to afford the desired product **11** (25.5mg, 89% yield) with 90% *ee*.  $[\alpha]_D^{20} = -9.3$  ( $c = 0.4$ , Chloroform).  $^1\text{H NMR}$  (400 MHz, Chloroform-*d*)  $\delta$  7.09 (d,  $J = 8.6$  Hz, 2H), 6.84 – 6.75 (m, 2H), 3.78 (s, 3H), 2.54 (t,  $J = 7.4$  Hz, 2H), 1.88 – 1.56 (m, 12H), 1.50 (ddd,  $J = 13.5$ , 8.1, 3.9 Hz, 4H), 1.17 (s, 3H).  $^{13}\text{C NMR}$  (100 MHz, Chloroform-*d*)  $\delta$  157.7, 134.8, 129.3, 113.7, 91.0, 82.6, 55.3, 42.1, 39.8, 39.6, 37.4, 37.0, 35.6, 27.5, 27.0, 24.0, 23.9. HRMS (ESI) calculated for  $[\text{C}_{19}\text{H}_{28}\text{NaO}_2]$   $[\text{M}+\text{Na}]^+$ : 311.1982 found: 311.1977. Enantiomeric excess was determined by HPLC with a Chiralpak ADH+ ADH column (hexanes: 2-propanol = 99: 1, 0.6 mL/min, 254 nm); major enantiomer  $t_r = 14.356$  min, minor enantiomer  $t_r = 13.818$  min.

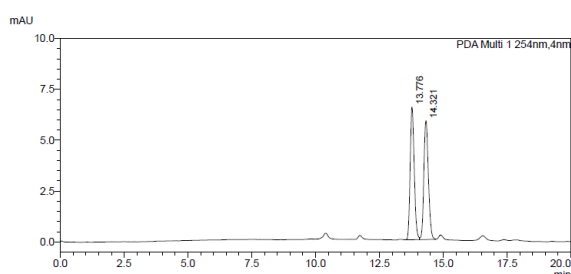

<Peak Table>

| Peak# | Ret. Time | Height | Height% | Area   | Area%   |
|-------|-----------|--------|---------|--------|---------|
| 1     | 13.776    | 6521   | 52.773  | 72667  | 50.212  |
| 2     | 14.321    | 5836   | 47.227  | 72053  | 49.788  |
| Total |           | 12357  | 100.000 | 144720 | 100.000 |

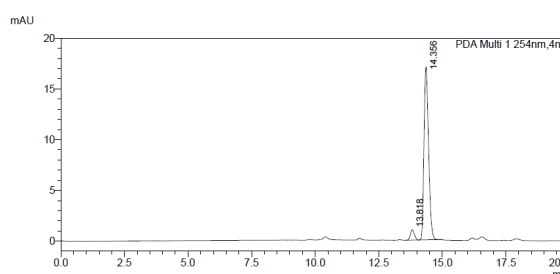

<Peak Table>

| Peak# | Ret. Time | Height | Height% | Area   | Area%   |
|-------|-----------|--------|---------|--------|---------|
| 1     | 13.818    | 1023   | 5.654   | 11318  | 5.038   |
| 2     | 14.356    | 17068  | 94.346  | 213343 | 94.962  |
| Total |           | 18090  | 100.000 | 224661 | 100.000 |

#### 4.6.2 1-((*S*, *E*)-3-(4-methoxyphenyl)-1-((*S*)-2-methyl-1-oxaspiro[4.4]nonan-2-yl)allyl)-1H-pyrazole (**12**)

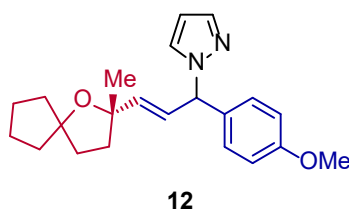

To a solution of **1**, 4-dioxane (1.0 mL) was added (*R*)-**5c** (0.2 mmol), (0.24 mmol) and DDQ (0.28 mmol). The reaction mixture was stirred at room temperature for 8 h and then the solvent was removed under vacuum. The residue was purified by column chromatography on a silica gel column(hexanes/EtOAc=80/1) to afford the desired product **12** as a white liquid (62 mg, 88% yield) with 1.2:1 dr.  $[\alpha]_D^{20} = -12.6$  ( $c = 0.4$ , Chloroform).  $^1\text{H NMR}$  (400 MHz, Chloroform-*d*)  $\delta$  7.56 – 7.47 (m, 1H), 7.38 (dd,  $J = 4.3$ , 2.3 Hz, 1H), 7.09 (dt,  $J = 4.5$ , 2.2 Hz, 2H), 6.85 (dd,  $J = 8.7$ , 1.0 Hz, 2H),

6.25 (dd,  $J = 4.1, 2.1$  Hz, 1H), 6.17 (ddd,  $J = 15.3, 6.7, 1.2$  Hz, 1H), 5.99 (d,  $J = 6.6$  Hz, 1H), 5.56 (ddd,  $J = 15.3, 4.8, 1.3$  Hz, 1H), 3.78 (d,  $J = 0.7$  Hz, 3H), 1.96 – 1.67 (m, 8H), 1.66 – 1.48 (m, 4H), 1.31 (d,  $J = 0.8$  Hz, 3H).  $^{13}\text{C}$  NMR (100 MHz, Chloroform-*d*)  $\delta$  159.2, 141.3, 141.3, 139.2, 132.0, 131.9, 128.7, 128.6, 128.1, 128.0, 125.4, 125.3, 114.0, 105.4, 105.3, 92.2, 92.1, 81.9, 81.9, 66.5, 66.4, 55.3, 39.6, 39.0, 38.9, 38.5, 38.4, 36.7, 28.4, 28.1, 23.9. HRMS (ESI) calculated for  $[\text{C}_{22}\text{H}_{28}\text{N}_2\text{NaO}_2]$   $[\text{M}+\text{Na}]^+$ : 375.2043 found: 375.2038.

#### 4.6.3 (*S, E*)-4-(3-(2-methyl-1-oxaspiro[4.4]nonan-2-yl)prop-1-en-1-yl)phenol (**13**)<sup>8-9</sup>

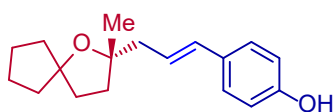

$\text{C}_{12}\text{H}_{25}\text{SH}$  (204 mg, 1 mmol) was added to a stirred suspension of sodium hydride (60% dispersion in mineral oil) (44 mg, 1.1 mmol) in dry diethyl ether (2 mL) over 10 min at a temperature around 5 °C. The solvent was removed in a vacuum, and the obtained residue was added NMP (1 mL). Then (*R*)-**5c** (143 mg, 0.5 mmol) was added with vigorous stirring at room temperature. The mixture was allowed to heat to 130 °C and kept at that temperature for 18 h. The solvent was neutralized to  $\text{pH} < 7$  by using a diluted hydrochloric acid solution and extracted with ethyl acetate ( $3 \times 15$  mL). The combined organic layer was washed with brine, dried over anhydrous  $\text{Na}_2\text{SO}_4$  and filtered. The filtrate was concentrated, after flash column chromatography on a silica gel (petroleum ether: ethyl acetate = 5: 1) give the product **13** as a yellow solid (108.4 mg, 80% yield, 90% ee). m.p. 137-147 °C.  $[\alpha]_{\text{D}}^{20} = 0.57$  ( $c = 0.4$ , Chloroform).  $^1\text{H}$  NMR (400 MHz, Chloroform-*d*)  $\delta$  7.25 (s, 1H), 7.13 (d,  $J = 8.6$  Hz, 2H), 6.78 (t,  $J = 5.6$  Hz, 2H), 6.30 (d,  $J = 15.8$  Hz, 1H), 6.11 – 5.97 (m, 1H), 2.44 – 2.31 (m, 2H), 1.97 – 1.81 (m, 5H), 1.79 – 1.67 (m, 3H), 1.58 (dddd,  $J = 14.4, 10.4, 9.8, 5.4$  Hz, 4H), 1.27 (s, 3H).  $^{13}\text{C}$  NMR (100 MHz, Chloroform-*d*)  $\delta$  155.43, 132.12, 129.92, 127.23, 123.88, 115.52, 92.21, 83.58, 45.67, 39.54, 39.36, 37.16, 36.79, 27.48, 23.69. RMS (ESI) calculated for  $[\text{C}_{18}\text{H}_{24}\text{NaO}_2]$   $[\text{M}+\text{Na}]^+$ : 295.1662 found: 295.1669.  $[\alpha]_{\text{D}}^{20} = 0.57$  ( $c = 0.4$ , Chloroform). Enantiomeric excess was determined by HPLC with a Chiralpak ADH column (hexanes: 2-propanol = 99: 10, 0.5 mL/min, 254 nm); major enantiomer  $t_{\text{r}} = 12.151$  min, minor enantiomer  $t_{\text{r}} = 14.004$  min.

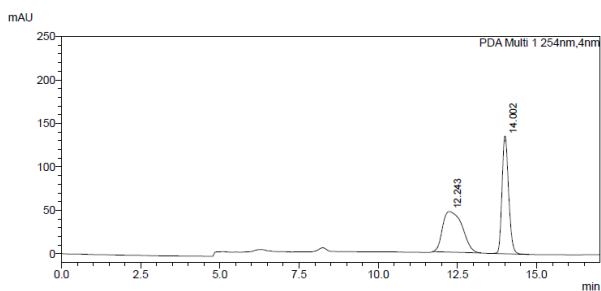

<Peak Table>

| Peak# | Ret. Time | Height | Height% | Area    | Area%   |
|-------|-----------|--------|---------|---------|---------|
| 1     | 12.243    | 46705  | 25.629  | 2009709 | 50.680  |
| 2     | 14.002    | 135528 | 74.371  | 1955797 | 49.320  |
| Total |           | 182233 | 100.000 | 3965507 | 100.000 |

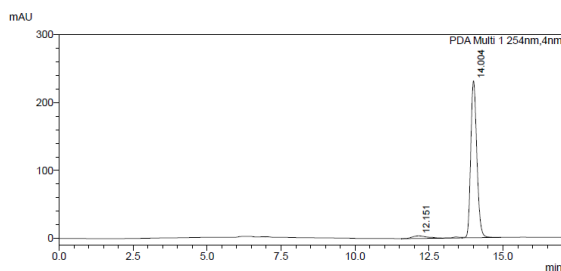

<Peak Table>

| Peak# | Ret. Time | Height | Height% | Area    | Area%   |
|-------|-----------|--------|---------|---------|---------|
| 1     | 12.151    | 3746   | 1.595   | 169043  | 4.853   |
| 2     | 14.004    | 231146 | 98.405  | 3314183 | 95.147  |
| Total |           | 234893 | 100.000 | 3483227 | 100.000 |

## 5. X-ray structure of Xu6 and 13.

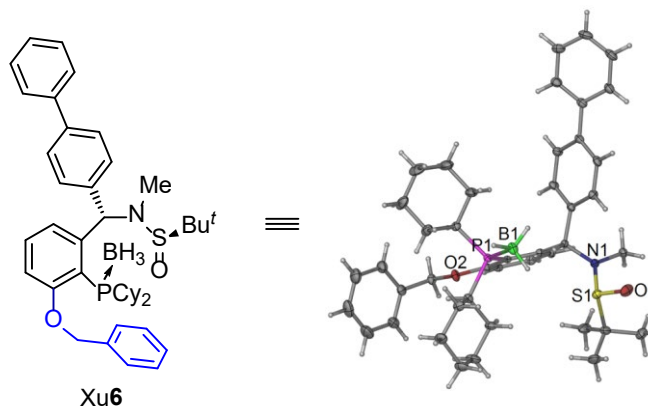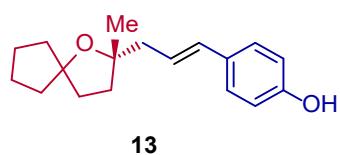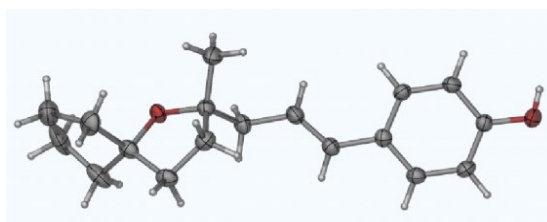

## 6. Procedure of vibrational circular dichroism (VCD) experiment

VCD and IR measurements of **8-D** were performed on a BioTools ChiralIR-2X FT-VCD spectrometer, equipped with a single photoelastic modulation and a mercury cadmium tellurium detector. 15 mg of sample was dissolved in 300  $\mu$ L  $\text{CDCl}_3$  and placed in a  $\text{BaF}_2$  cell with a pathlength of 75  $\mu$ m. Data were acquired at a resolution of 4  $\text{cm}^{-1}$  for 15 h.

## 7. Computational details

### General calculation procedure

Density functional theory (DFT) calculations were carried out using Gaussian 09 E.01 software package.<sup>10</sup> All structure optimizations and frequency calculations were performed using the PBE0 functional<sup>11</sup> with D3BJ dispersion correction (PBE0-D3BJ) and combined basis set.<sup>12-13</sup> That is SDD basis set<sup>14</sup> for Palladium and 6-31G\* basis set for all other elements.<sup>15-16</sup> Intrinsic reaction coordinate calculations were performed to ensure every TS is connected with corresponding equilibrium structure<sup>17-18</sup>. Single point energies were further calculated using PBE0-D3BJ functional and def2-TZVP basis set<sup>19</sup> for higher accuracy. Truhlar and coworkers' SMD solvation model<sup>20</sup> was employed to consider the solvent effect of the mixed solvent of Et<sub>2</sub>O and Hexane. The solvent is defined by 7 parameters. As it is not on the solvent list of Gaussian 09 software, the parameters used in calculation are the average value of Et<sub>2</sub>O and Hexane: eps (3.06095), epsinf (1.36375), HBondAcidity(0.00), HBondBasicity(0.205), SurfaceTensionAtInterface(24.855), CarbonAromaticity(0.000), ElectronegativeHalogenicity(0.000). 3D structures and isosurfaces are visualized by VMD 1.9.3<sup>21</sup> and CYLview v0.1b<sup>22</sup>.

### VCD calculation procedure

VCD spectra of different conformers may differ considerably. In order to compare with the experimental spectrum, conformation search and Boltzmann weighted spectrums are essential. First, systematic conformation search of both configuration (*S* and *R*) of **8-D** (**8-D-S** and **8-D-R**) was performed with **CREST** program developed by Prof. Grimme.<sup>23</sup> (detailed input: “crest xtbopt.xyz --T 4 --v3 --ewin 6 --rthr 0.35 --ethr 0.2 --chrg 0 --noreftopo --temp 298.15 --gfn 2 --shake 1 --hmass 1”) Then, **isostat** component of **Molclus** program developed by Tian Lu et al.<sup>24</sup> is used to remove the duplicated conformers (detailed input: “isostat crest\_conformers.xyz -nt 4 -Nout 60 -Eout 5 -Edis 0.3 -Gdis 0.3 -T 298.15”). 23 and 28 low-energy conformations of **8-D-S** and **8-D-R** were achieved, respectively.

Then, optimization and free energy calculations of the structures were carried out using the Gaussian 09 E.01 software package.<sup>10</sup> All structure optimizations, frequency and VCD spectrum calculations (invoked by “freq=vcd” keyword) were performed using B3LYP functional<sup>25-27</sup> with D3BJ dispersion correction developed by Grimme et al. And 6-31G\* basis set was chosen to match the frequency correction factor (0.9614) provided by Multiwfn.<sup>28</sup> The solvent was changed to chloroform (specified by “scrf=(smd,solvent=chloroform)” in the command line of Gaussian input file) to match the solvent (CDCl<sub>3</sub>) used in the VCD experiment. Single point energies were further calculated at B3LYP-D3BJ/def2-TZVP level for higher accuracy.

After obtaining the free energy of all conformations, their VCD spectrum were calculated according to Boltzmann distribution with Multiwfn.<sup>28</sup> FWHM was set as 8.0 cm<sup>-1</sup>, while frequency correction factor is 0.9614.

Experimental and simulated (with the same procedure stated above) IR spectrum of **8-D-SR** and **8-D-SS** are provided is **Supplementary Figure1**.

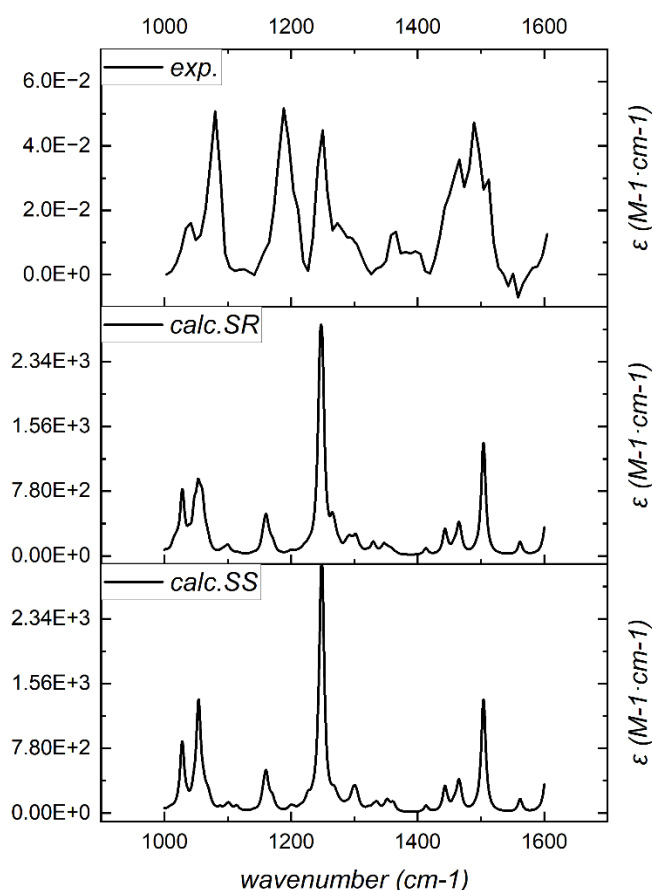

**Supplementary Figure1. Experimental and simulated IR spectrum of 8-D-SR and 8-D-SS**

Considering that free energy profile of conformations may be sensitive to the computational parameters, which will influence the Boltzmann distribution result and consequently result in differences in simulated spectrums, we slightly altered the calculation parameters and reperformed the calculation. The Boltzmann distribution profile are provided in **Supplementary Table1** and spectrums are provided in **Supplementary Figure2**. We observed that while there are variations in the Boltzmann distribution of different conformers and the spectra, the overall trend remains consistent across various calculation levels. Therefore, we believe that this result lends support to our initial conclusion.

**Supplementary Table1. Boltzmann distribution profile of 8-D-S conformers under different computational parameters**

| structure index | standard* | no-disp-scrf** | no-disp-scrf-dp*** |
|-----------------|-----------|----------------|--------------------|
| 0               | 4.80%     | 2.40%          | 2.51%              |
| 1               | 4.62%     | 4.93%          | 4.89%              |
| 2               | 6.96%     | 6.78%          | 6.90%              |



|    |        |        |        |
|----|--------|--------|--------|
| 3  | 14.23% | 14.60% | 10.50% |
| 4  | 11.03% | 4.25%  | 4.69%  |
| 5  | 10.99% | 4.25%  | 4.69%  |
| 6  | 4.74%  | 1.90%  | 1.96%  |
| 7  | 5.39%  | 6.17%  | 6.26%  |
| 8  | 0.77%  | 0.35%  | 0.26%  |
| 9  | 2.83%  | 3.99%  | 4.04%  |
| 10 | 0.44%  | 0.22%  | 0.20%  |
| 11 | 7.11%  | 12.98% | 13.46% |
| 12 | 8.69%  | 0.38%  | 0.43%  |
| 13 | 3.83%  | 7.70%  | 8.19%  |
| 14 | 3.63%  | 4.01%  | 4.23%  |
| 15 | 1.42%  | 3.90%  | 4.18%  |
| 16 | 1.55%  | 4.65%  | 4.73%  |
| 17 | 3.58%  | 10.66% | 11.87% |
| 18 | 0.52%  | 0.18%  | 0.18%  |
| 19 | 1.55%  | 4.69%  | 4.74%  |
| 20 | 0.71%  | 0.33%  | 0.33%  |
| 21 | 0.31%  | 0.34%  | 0.38%  |
| 22 | 0.31%  | 0.34%  | 0.38%  |

\* standard parameter

\*\* standard parameter without dispersion correction and solvent model

\*\*\* standard parameter without dispersion correction and solvent model and change basis from 6-31G\* to 6-31G\*\* in optimization process

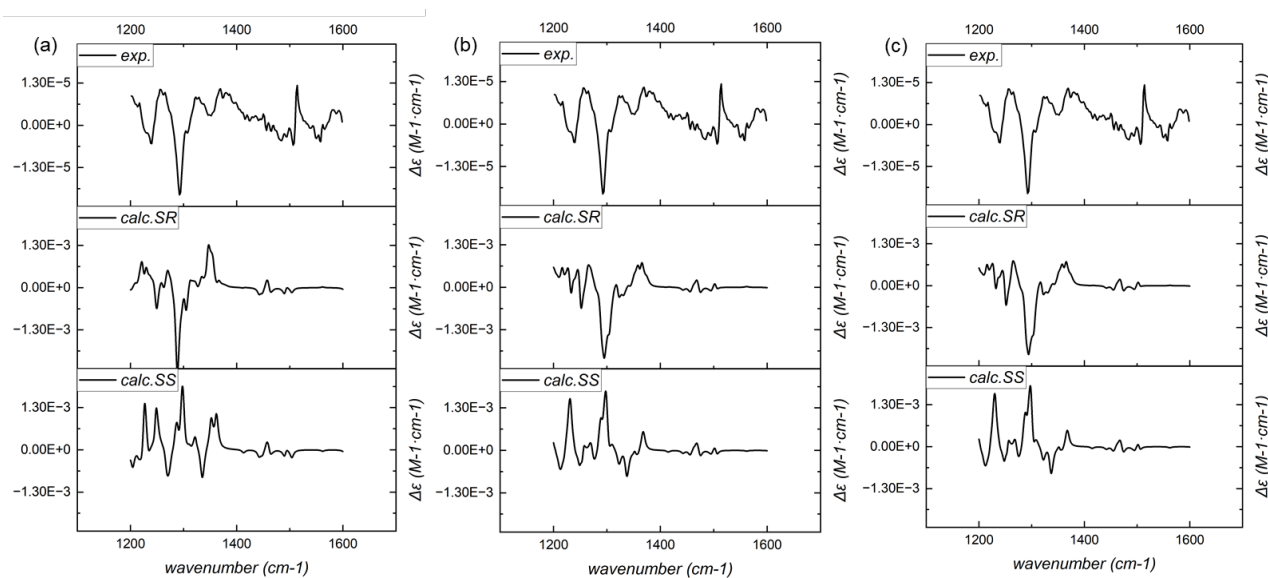

**Supplementary Figure 2. VCD spectrum of 8-D-SR and 8-D-SS under different computational parameters.** (a) standard parameter; (b) standard parameter without dispersion correction and solvent model; (c) standard parameter without dispersion correction and solvent model and change basis from 6-31G\* to 6-31G\*\* in optimization process.

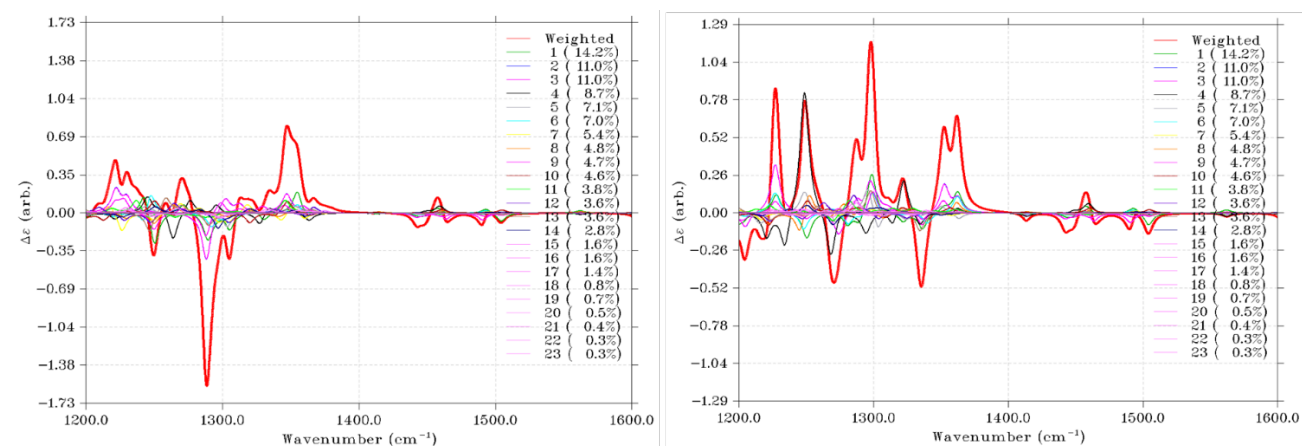

**Supplementary Figure3. Overlaid and weighted 8-D-SR (left) and 8-D-SS (right) VCD spectra of all conformers under standard calculation parameters**

In order to be certain that we have considered enough conformers, clustering threshold was tightened in *isostat* (modified input: “*isostat crest\_conformers.xyz -nt 4 -Nout 60 -Eout 5 -Edis 0.2 -Gdis 0.2 -T 298.15*”), and 38 and 42 low-energy conformations of 8-D-S and 8-D-R were achieved. VCD calculation procedure were applied to these conformers and the comparison between the 8-D-SS and 8-D-SR VCD spectra of different number of conformers are provided in **Supplementary Figure4**. From which we may conclude that the conformers we have taken into consideration is basically sufficient and the spectra is reliable.

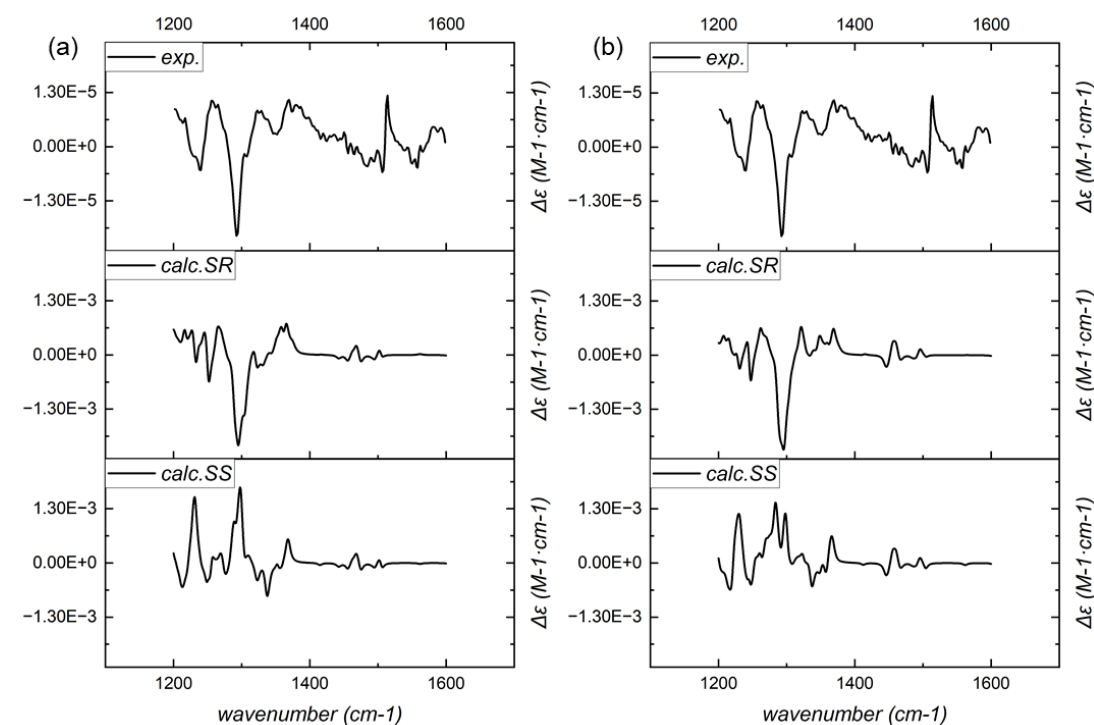

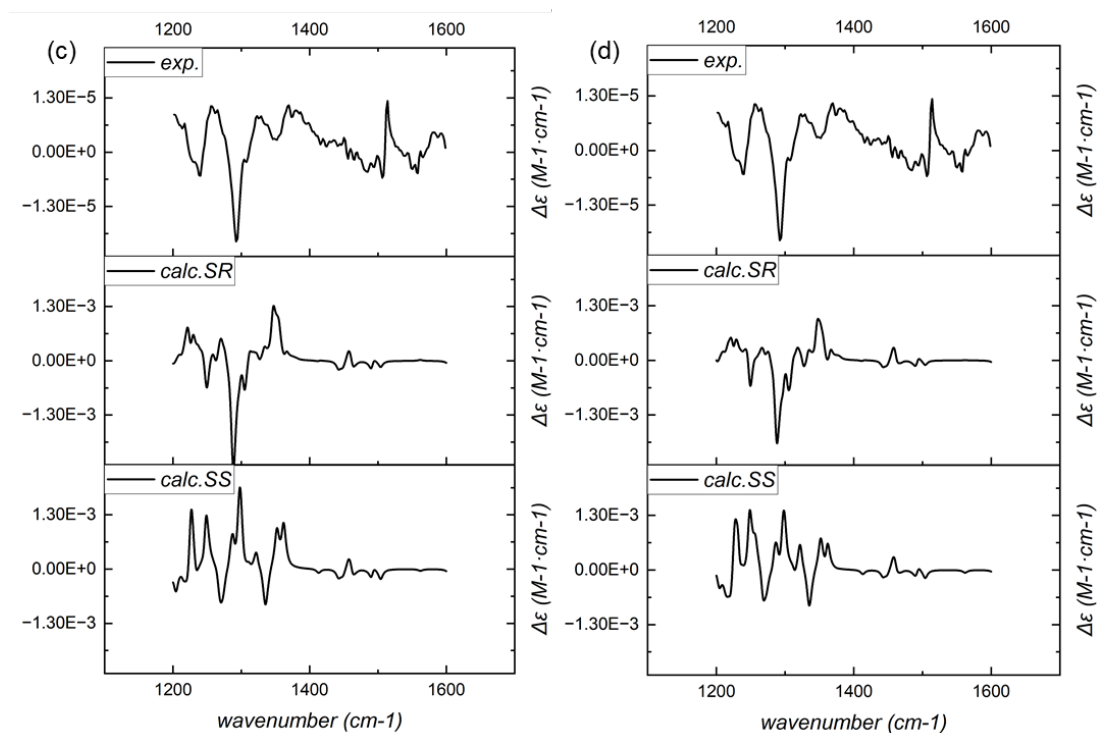

**Supplementary Figure4. Comparison between VCD spectrum calculated with different number of conformers.** (a) standard parameter without dispersion correction and solvent model, 23 conformers; (b) standard parameter without dispersion correction and solvent model, 38 conformers; (c) standard parameter, 23 conformers; (d) standard parameter, 38 conformers.

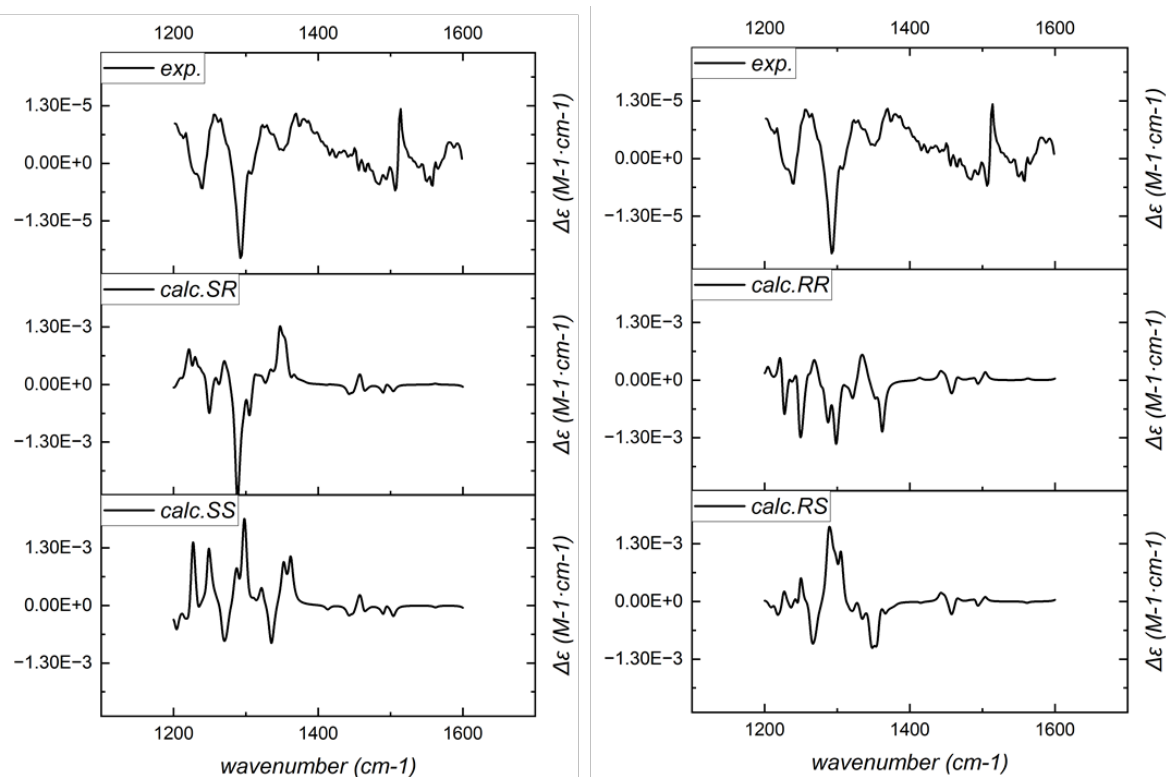

**Supplementary Figure5. Comparison between 8-D-S (left) and 8-D-R (right) VCD spectrum.**

### Transition state calculations

Since the conformations of the TSs are quite complicated, in order to prove that the TS core structures found in **Xu8** are representative in this reaction other than a result by chance, **Xu1**, **Xu2**, **Xu3**, **Xu6**, **Xu8**, **Xu9** were taken as templates to calculate the free energy difference between major and minor TSs based on the core TS conformation found in **Xu8**. The calculated *ee*% are in good accordance with the experimental results (**Supplementary Table2**). TS structures are provided in **related .xlsx file along with the SI**, named as **Xu1-1a-2a-major** and **Xu1-1a-2a-minor** etc.

**Supplementary Table2. Calculated and experimental *ee*%**

| Entry | Ligand and reactants | Calc. $\Delta\Delta G$<br>(kcal/mol) | Calc. <i>ee</i> % | Exp. <i>ee</i> % |
|-------|----------------------|--------------------------------------|-------------------|------------------|
| 1     | <b>Xu1 + 1a + 2a</b> | -0.02                                | -2                | 2                |
| 2     | <b>Xu2 + 1a + 2a</b> | 0.87                                 | 63                | 85               |
| 3     | <b>Xu3 + 1a + 2a</b> | 1.42                                 | 83                | 86               |
| 4     | <b>Xu6 + 1a + 2a</b> | 0.98                                 | 68                | 82               |
| 5     | <b>Xu8 + 1a + 2a</b> | 2.23                                 | 95                | 92               |
| 6     | <b>Xu9 + 1a + 2a</b> | 1.81                                 | 91                | 92               |

### Energy difference decomposition calculations

In order to analysis the key stereo-controlling factors and investigate the CH- $\pi$  interaction quantitatively, energy difference decomposition calculations were carried out. Firstly, from **Supplementary Table3**, we can tell that metal-involved interactions are quite similar between TSs of **Xu6** and **Xu8**. In other words, these interactions do not contribute much to the  $\Delta\Delta E$  between them. Therefore, Pd atoms are removed from the TS structures in the later analysis, to eliminate the interaction difference involving metal centers. And weak interactions between **Xu-Phos** and substrates are focused.

**Supplementary Table3. Calculated  $\Delta\Delta G$  and  $\Delta E$  of structure without Pd (kcal/mol)**

| Entry | Ligand and reactants | Calc. $\Delta\Delta G$ | no Pd $\Delta E$ | Metal-involved interaction |
|-------|----------------------|------------------------|------------------|----------------------------|
| 1     | <b>Xu6 + 1a + 2a</b> | 0.98                   | 7.86             | 6.88                       |
| 2     | <b>Xu8 + 1a + 2a</b> | 2.23                   | 9.35             | 7.12                       |

Secondly, to investigate interaction between **Xu-Phos** and substrates, no Pd TS structures were split into two dimers: (a) **Xu-Phos**-alcohol dimer (referenced as dimer1 later) and (b) **Xu-Phos**-vinyl substrate dimer (referenced as dimer2 later).  $\Delta E_{\text{dimer1}}$  and  $\Delta E_{\text{dimer2}}$  are provided in **Supplementary Table4**.

**Supplementary Table4. Calculated  $\Delta E_{\text{dimer1}}$  and  $\Delta E_{\text{dimer2}}$  (kcal/mol)**

| Entry | Ligand and reactants | $\Delta E_{\text{dimer1}}$ | $\Delta E_{\text{dimer2}}$ |
|-------|----------------------|----------------------------|----------------------------|
| 1     | <b>Xu6 + 1a + 2a</b> | 2.53                       | 3.80                       |
| 2     | <b>Xu8 + 1a + 2a</b> | 1.84                       | 8.20                       |

From **Supplementary Table4**, it is clear that the energy difference of dimer2 is the main contributor of the total energy gap. So, we further separate the dimer into (a) **Xu-Phos** and (b) vinyl substrate. More analysis results (**Fig 7b**) are provided in the manuscript.

### Analysis of different conformation of Xu6 and Xu8 TSs

We proposed that the side-arm conformation of **Xu6** and **Xu8** are critical to the enantioselectivity. To certify that current conformations are not a result by chance, we replaced H adjacent to the side-arm in **Xu6** TSs to OMe to generate new conformation of **Xu8** TSs and also generated new conformation of **Xu6** TSs with similar procedure. The energy difference profile of the TSs is provided in **Supplementary Table5**, the structures are shown in **Supplementary Figure6**, and coordinates are provided in **related .xlsx file along with the SI**.

**Supplementary Table5. Energy difference between conformations of Xu6 and Xu8 TSs (kcal/mol)**

| Entry | TS name          | $\Delta E_{\text{Xu-phos}}$ | $\Delta E_{\text{other}}$ | $\Delta E_{\text{int-sidearm}}$ | $\Delta E_{\text{int-all}}$ | $\Delta E_{\text{all}}$ | $\Delta G_{\text{all}}$ |
|-------|------------------|-----------------------------|---------------------------|---------------------------------|-----------------------------|-------------------------|-------------------------|
| 1     | <b>Xu6-major</b> | 2.51                        | 1.55                      | -0.04                           | -3.08                       | 0.98                    | 0.66                    |
| 2     | <b>Xu6-minor</b> | -1.50                       | 0.06                      | 3.67                            | 3.83                        | 2.39                    | 4.07                    |
| 3     | <b>Xu8-major</b> | 0.36                        | -0.08                     | 0.02                            | -0.39                       | -0.10                   | 1.42                    |
| 4     | <b>Xu8-minor</b> | 1.90                        | -0.28                     | -3.03                           | -0.50                       | 1.12                    | 2.08                    |

- 1) All energy differences are calculated as the new TSs' energy subtract the original TSs' energy
- 2)  $E_{\text{Xu-phos}}$  refers to the single point energy of **Xu-phos** segment in the TS structures
- 3)  $E_{\text{other}}$  refers to the sum of single point energy of all segments except for **Xu-phos** (i.e. vinyl substrate and alcohol substrate) in the TS structures
- 4)  $E_{\text{int-sidearm}}$  refers to the interaction energy between side-arm and vinyl substrate in the TS structures
- 5)  $E_{\text{int-all}}$  refers to the sum of interaction energy between all segments in the TS structures
- 6)  $E_{\text{all}}$  refers to the single point energy of the TS structures
- 7)  $G_{\text{all}}$  refers to the free energy of the TS structures

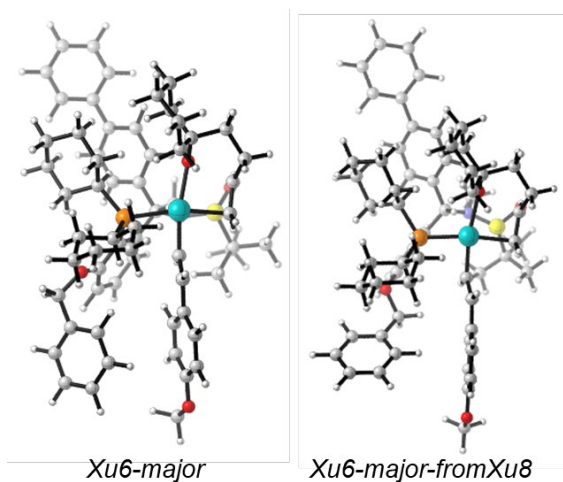

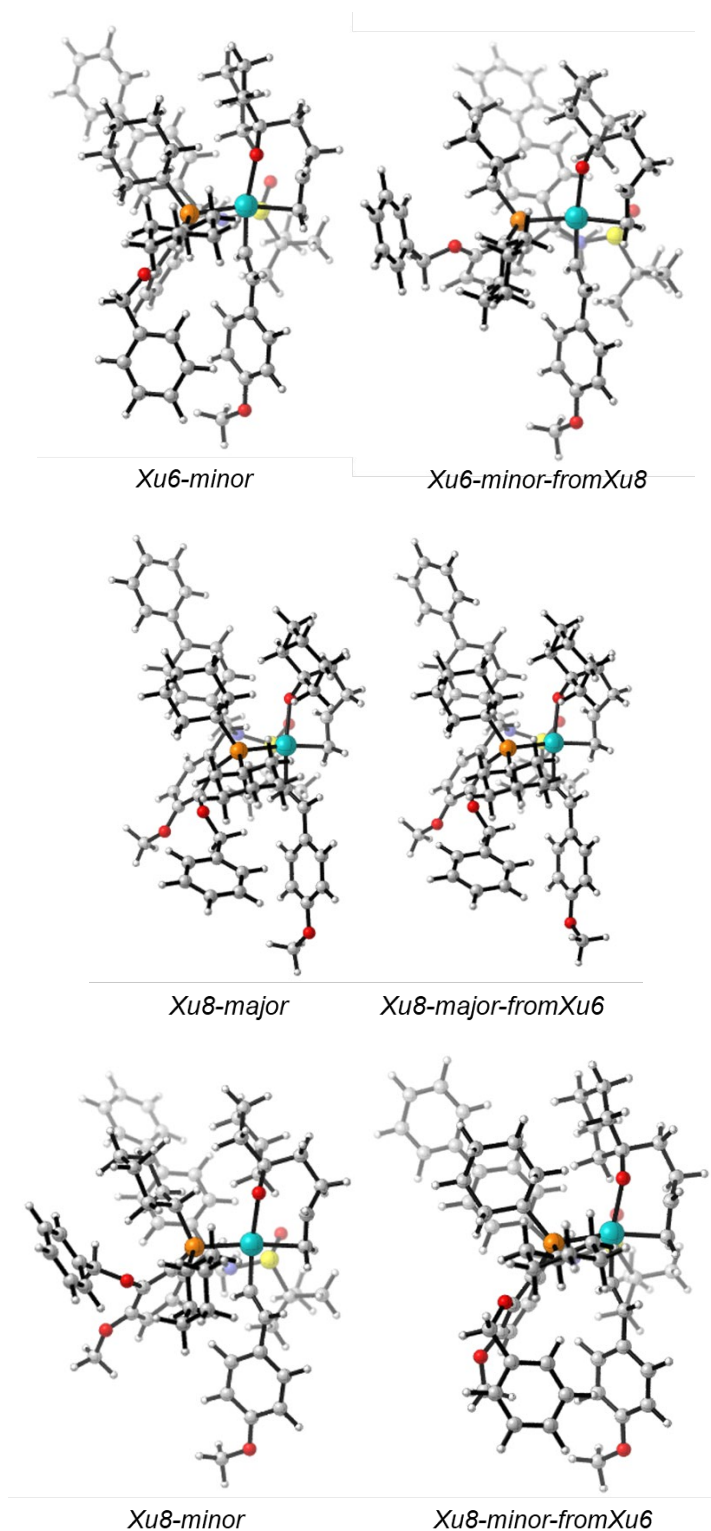

**Supplementary Figure6. Structures of different structures of Xu6 and Xu8 TSs.**

Referring to **Supplementary Table5**, we can make the following observations: 1) None of the new TS structures exhibit lower free energy compared to their corresponding original TS structures. This reinforces our analysis, which is primarily based on the original TS structures; 2) Focusing on the **Xu6**-major TSs, a noteworthy increase in energy, denoted by  $\Delta E_{\text{Xu-phos}}$ , suggests that the introduction of the OMe group does indeed compel the side-arm to adopt a different position (even though both positions are downward), resulting in an overall higher energy for the entire ligand (+2.51 kcal/mol); 3) Concerning the **Xu6**-minor TSs, it is notable that the primary contributor to

the increase in energy (+3.67 kcal/mol) is the loss of interaction between the side-arm and the vinyl substrate. This underscores the significance of this interaction in the overall energetics of the system; 4) In the case of **Xu8**-major TSs, after the H was substituted with OMe, side-arm was optimized spontaneously to a conformation similar to the original **Xu8**-major TS. As a result, the single-point energies of these structures turned out to be very similar.; 5) Concerning **Xu8**-minor TSs, forcing the side-arm to take the downward conformation indeed make the ligand energy higher (+1.90 kcal/mol), which is the main contributor of the overall energy rise, and although interaction between the side-arm and vinyl substrate is stronger, it is masked by the loss of other interactions.

#### Analysis of the effect of OR groups ortho to the side-arm

We originally proposed that the main reason of OMe promoting the side-arm effect is its steric influence. To verify this proposal, OMe group was replaced with OEt, OiPr and OtBu groups respectively to generate new ligands **Xu12**, **Xu13** and **Xu14**. Difference of free energies and *ee%* values were calculated according to the standard procedure and provided in **Supplementary Table6**.

**Supplementary Table6. Calculated and experimental *ee%* of ligands with different OR groups**

| Entry | Ligand and reactants  | Calc. $\Delta\Delta G$<br>(kcal/mol) | Calc. <i>ee%</i> | Exp. <i>ee%</i> |
|-------|-----------------------|--------------------------------------|------------------|-----------------|
| 1     | <b>Xu12 + 1a + 2a</b> | 2.16                                 | 94               | 90              |
| 2     | <b>Xu13 + 1a + 2a</b> | 0.99                                 | 68               | 85              |
| 3     | <b>Xu14 + 1a + 2a</b> | 1.08                                 | 72               | /*              |

\* Multiple attempts to synthesize **Xu14** all failed, so experimental *ee%* value of **Xu14** is not available.

The high calc. and exp. *ee%* value of **Xu12** supports that the steric effect of OR groups are beneficial to improvement of *ee%*. However, we also found that when the OR group gets bulkier, the *ee%* value starts to drop. From visual inspection of the TSs of **Xu13** and **Xu14**, we suspect that as the OR groups might have weak interaction with vinyl substrate (**Supplementary Figure7**). To verify this, interaction energy between OR groups and vinyl substrates are calculated and provided in **Supplementary Table7**.

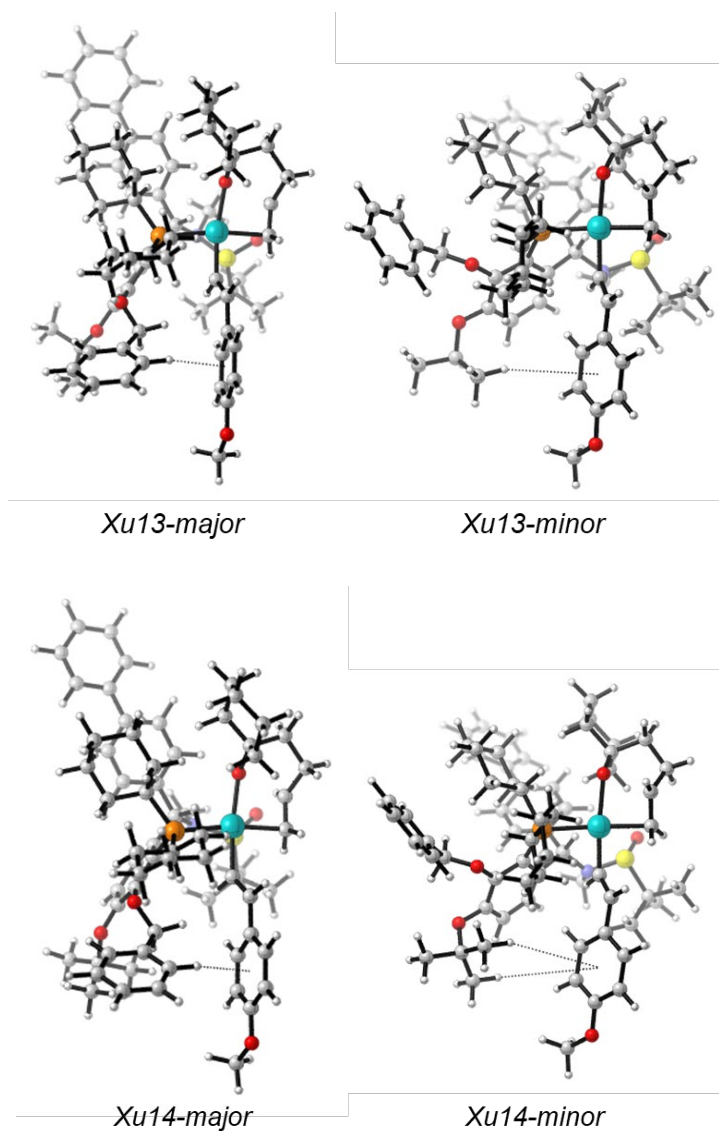

**Supplementary Figure7. Structure of Xu13 and Xu14 TSs**

**Supplementary Table7. Weak interaction energy between different OR groups and vinyl substrate (kcal/mol)**

| Entry | Ligand and reactants | Eint  | $\Delta$ Eint | Calc. $\Delta\Delta$ G |
|-------|----------------------|-------|---------------|------------------------|
| 1     | <b>Xu8-major</b>     | -0.01 | /             | /                      |
| 2     | <b>Xu8-minor</b>     | -0.13 | -0.12         | 2.23                   |
| 3     | <b>Xu12-major</b>    | -0.03 | /             | /                      |
| 4     | <b>Xu12-minor</b>    | -0.17 | -0.14         | 2.16                   |
| 5     | <b>Xu13-major</b>    | -0.07 | /             | /                      |
| 6     | <b>Xu13-minor</b>    | -0.77 | -0.70         | 0.99                   |
| 7     | <b>Xu14-major</b>    | -0.56 | /             | /                      |
| 8     | <b>Xu14-minor</b>    | -1.48 | -0.91         | 1.08                   |

From **Supplementary Table7**, it is clear that when the OR group is OMe or OEt, the interaction between OR group and vinyl substrate is quite weak and negligible, but when it comes to OiPr and OtBu, the interaction become significant. More importantly, the interactions in the minor TSs are



stronger than those in the major TSs due to the conformation difference. And  $\Delta E_{int}$  accounts for the major part of the decrease of the  $\Delta\Delta G$  and thus the decrease of  $ee\%$ .

In conclusion, we posit that the enhancement in  $ee\%$  achieved by introducing the OMe group into the ortho position of the side-arm is primarily attributed to its steric effect. Nonetheless, the introduction of bulkier substitution groups is likely to lead to weak interactions with the vinyl substrate, particularly in the minor transition state, consequently resulting in a decrease in  $ee\%$ .

### Visualization of weak interaction

We calculated weak interactions between two fragments: 1. Side-arm (OBn group, atom index 77-91 in **Xu8-ts**) 2. Vinyl substrate (atom index 108-126 in **Xu8-ts**). Weak interaction is calculated with IGM method by Multiwfn.<sup>28</sup> Isovalue of the isosurface shown in **Fig 7** is 0.01.

### Quantitative calculation of weak interaction

The interaction energy values are defined as the single point energy gap between the complex and components of the complex (**Eq 1**).<sup>29</sup>

$$E_{int} = E_{complex} - E_{component1} - E_{component2} \text{ (Eq 1)}$$

To illustrate the calculation procedure, we will use the example of calculating the interaction energy between the side-arm and the vinyl substrate in Xu8-ts. Firstly, we isolate the side-arm (OBn group, atom index 77-91) and the vinyl substrate (atom index 108-126) from the TS structure. Next, we introduce a hydrogen atom at each break point of the covalent bonds within these isolated molecules. The positions of these added hydrogen atoms are then optimized using standard optimization parameters (as outlined in the General Calculation Procedure), with all other atoms held strictly constrained. Finally, we perform a single-point energy calculation using standard parameters (as specified in the **General Calculation Procedure**). This calculation yields the energy of the complex as well as the individual energies of its constituent parts.

# 9. $^1\text{H}$ , $^{13}\text{C}$ , $^{31}\text{P}$ , $^{19}\text{F}$ NMR spectra

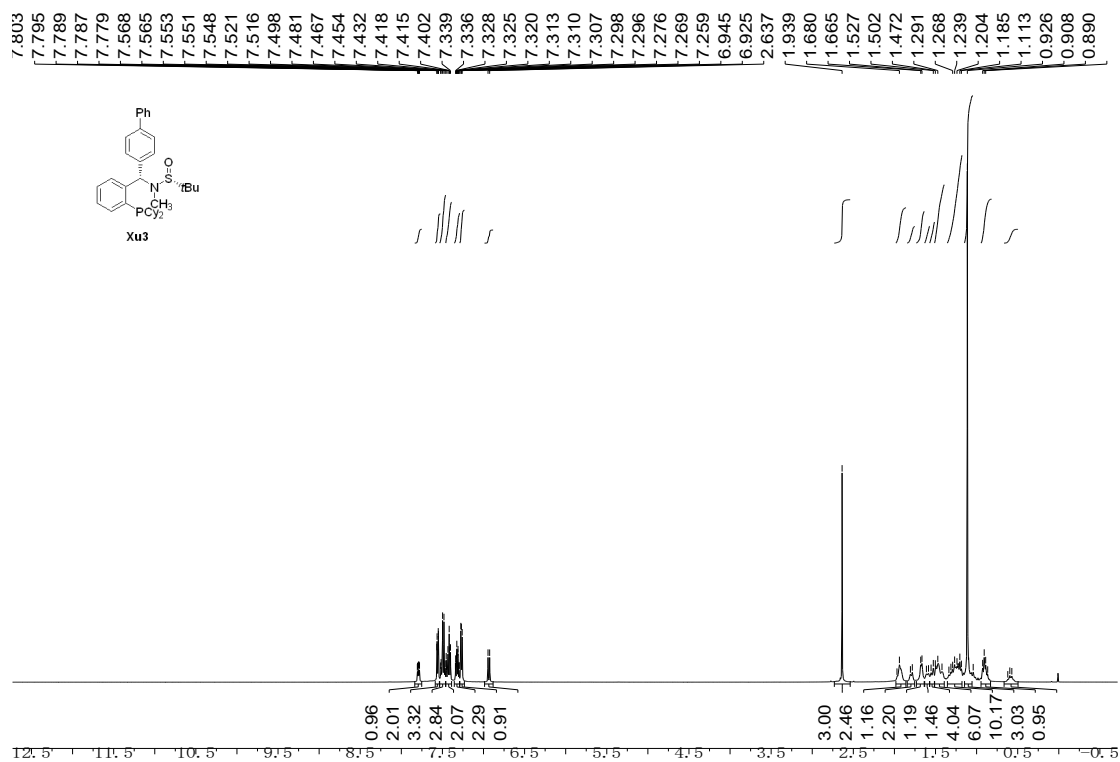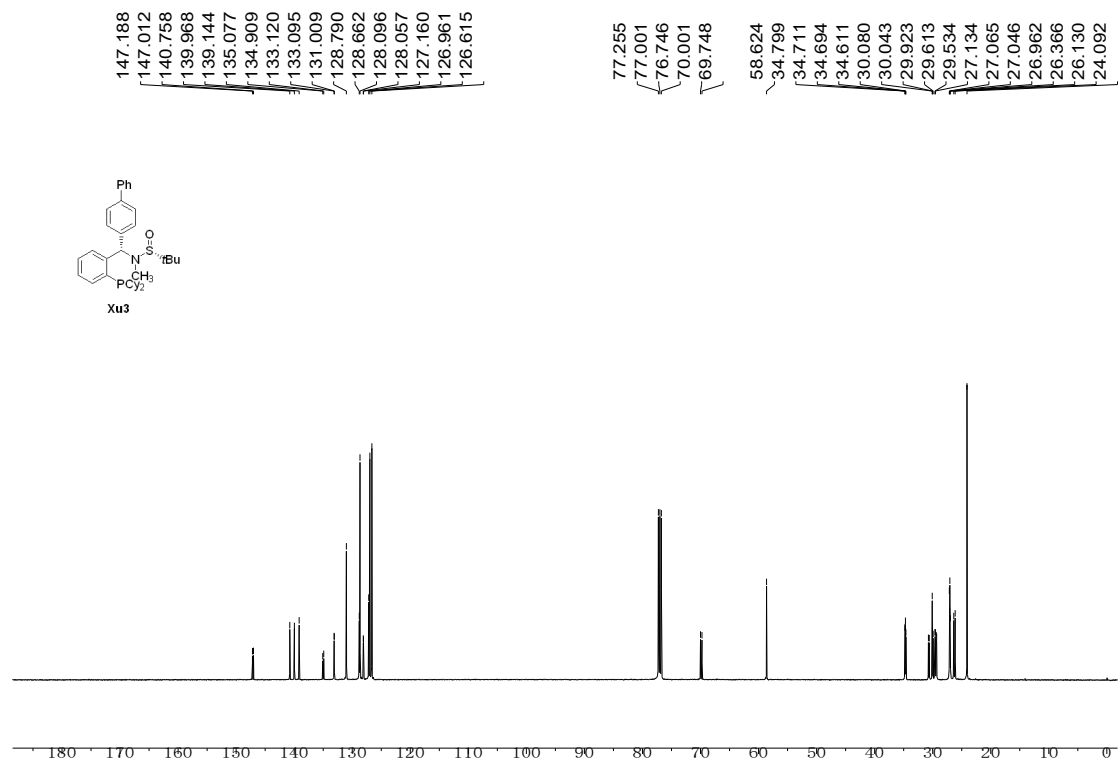

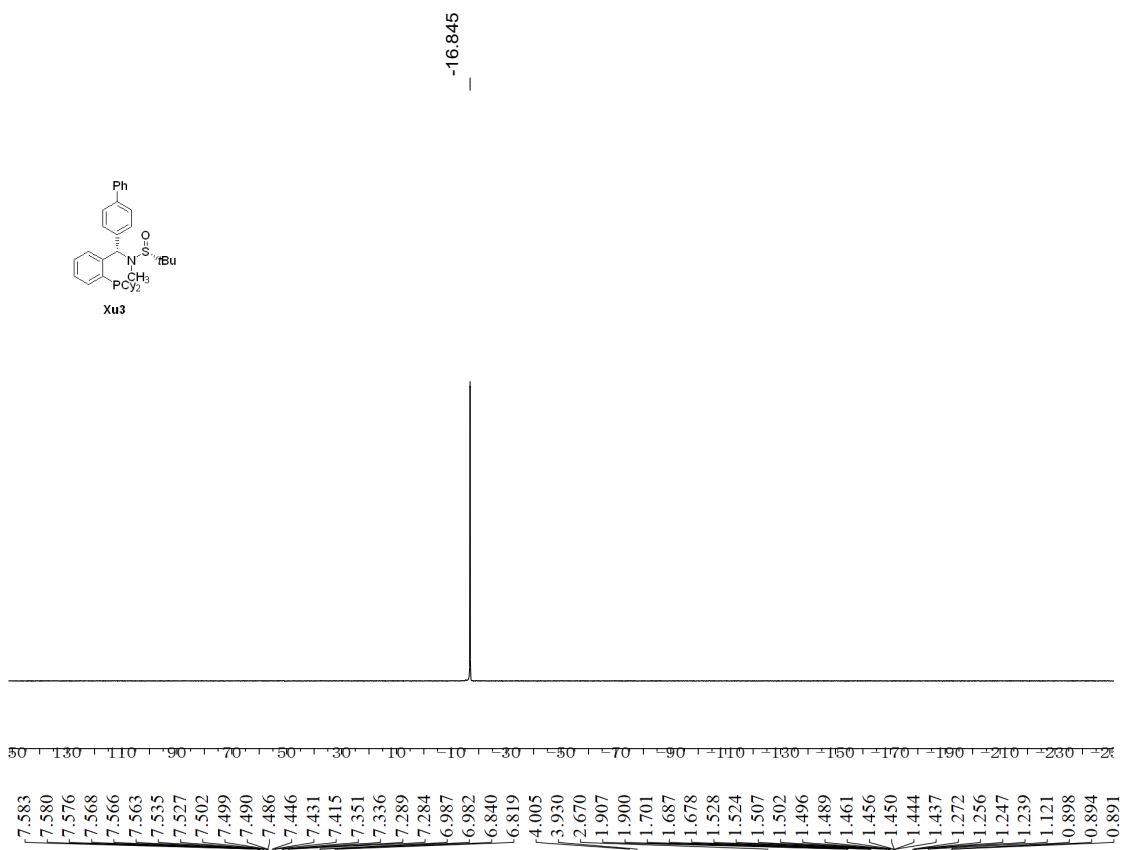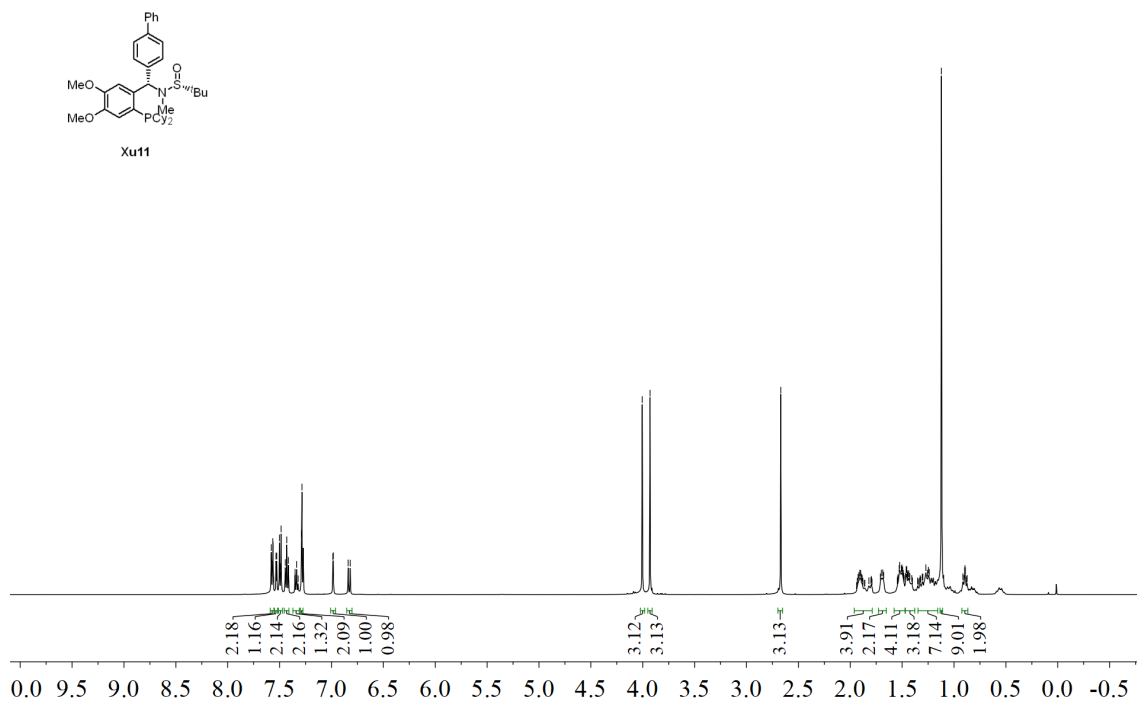

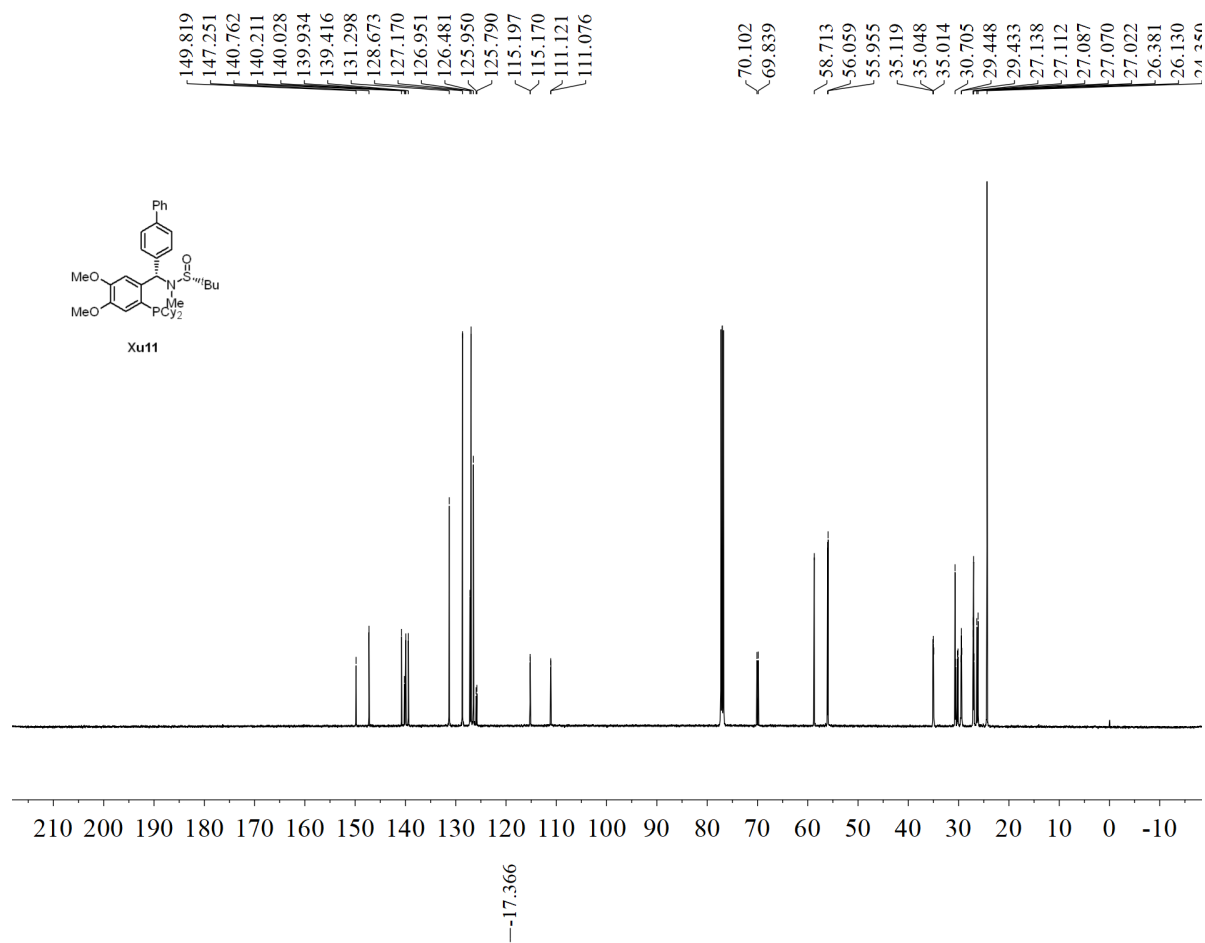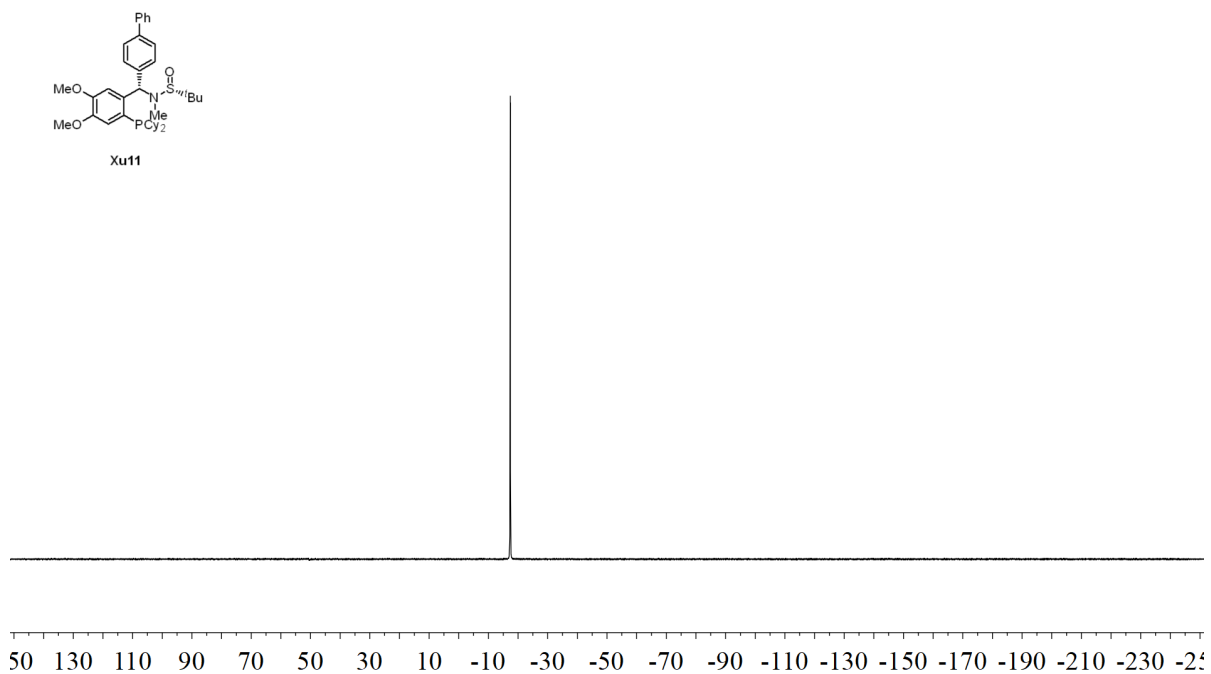

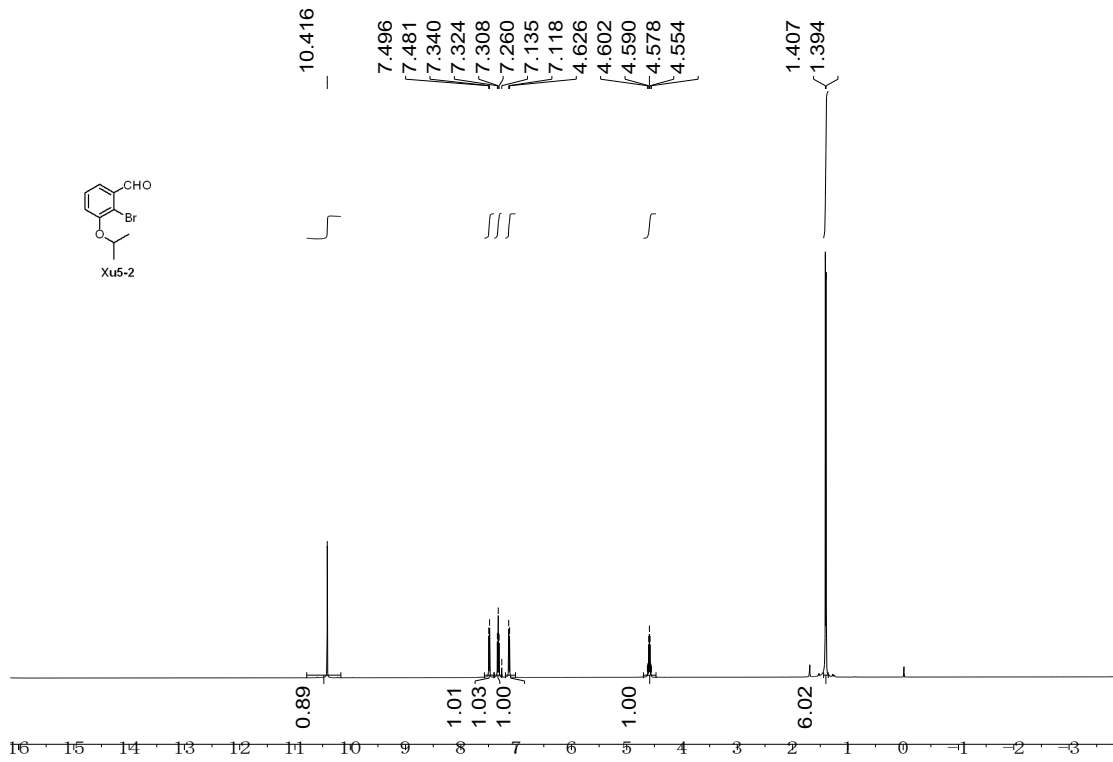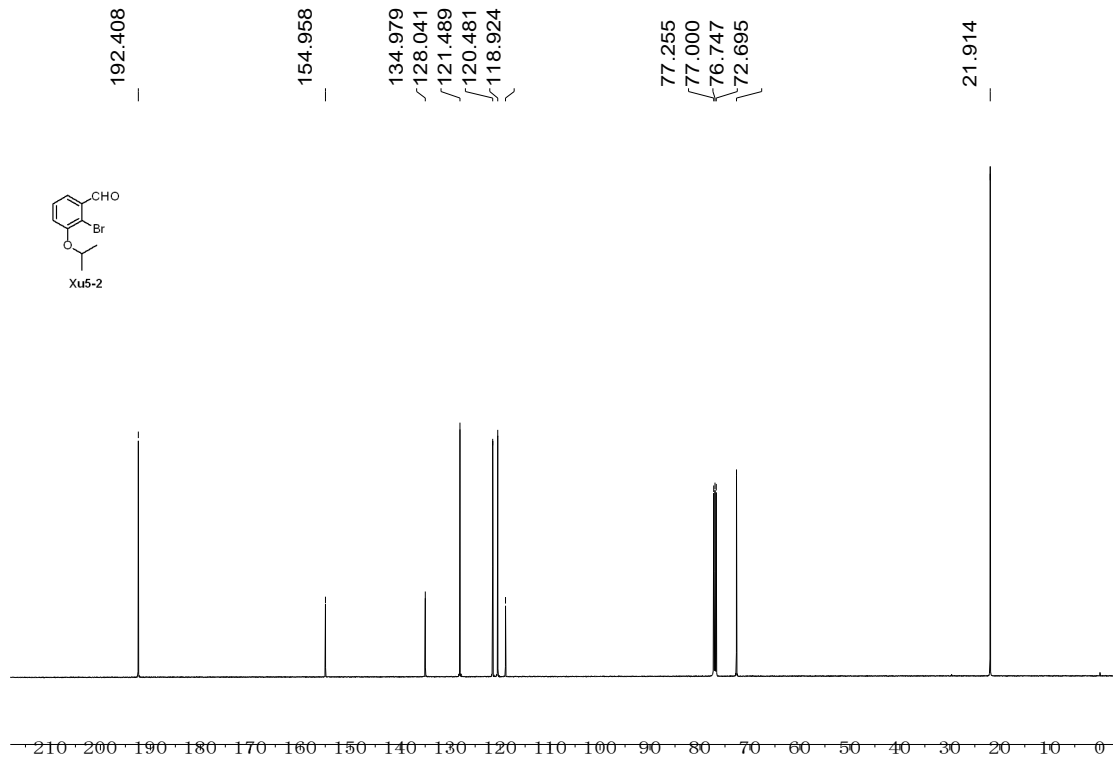

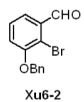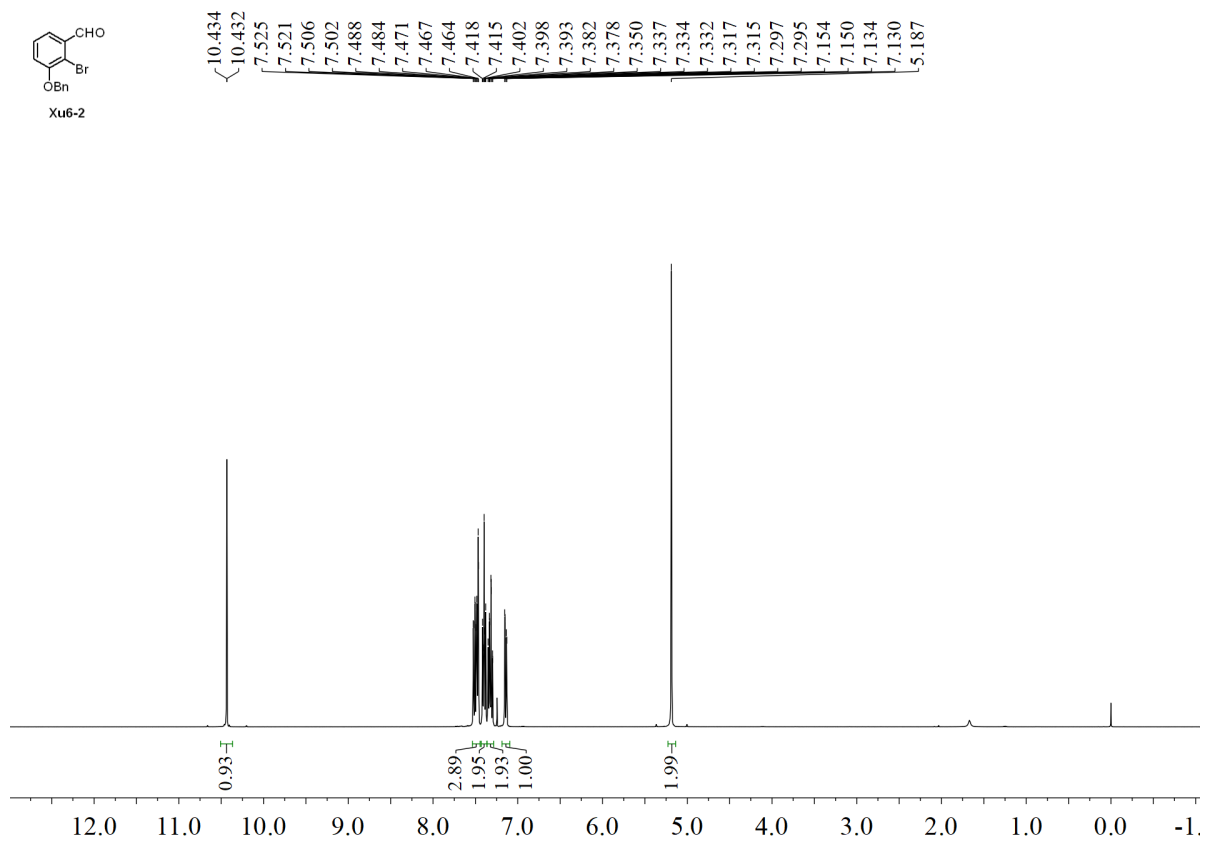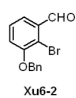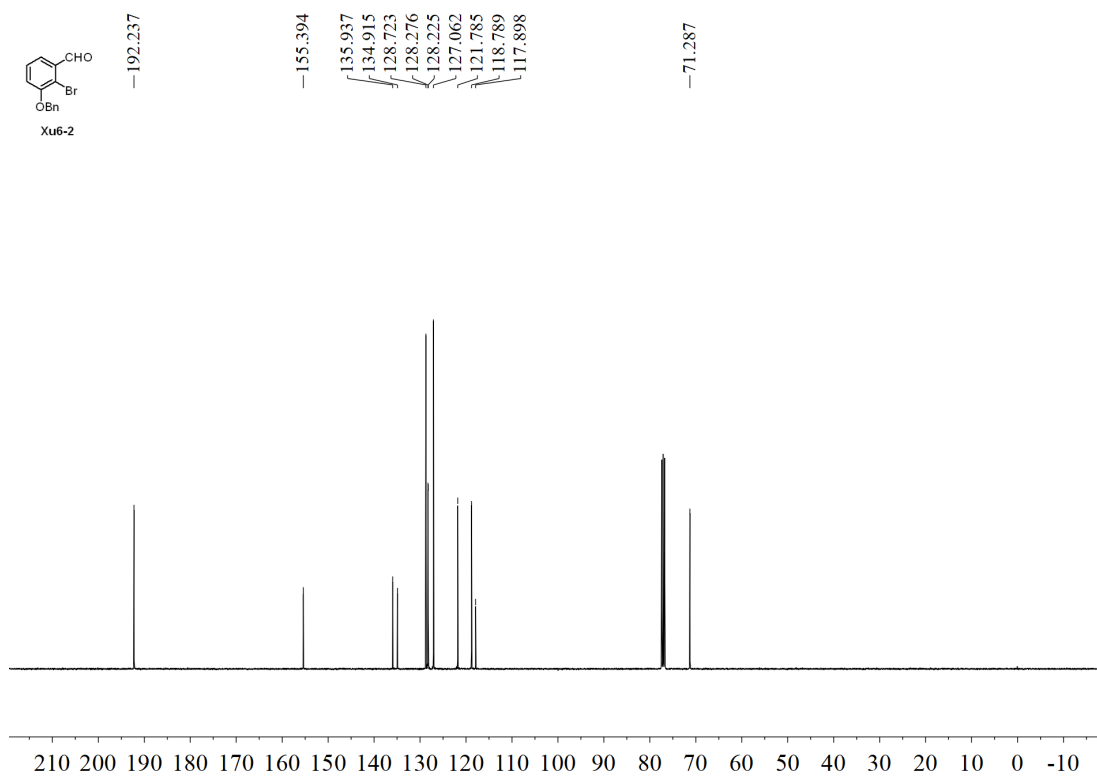

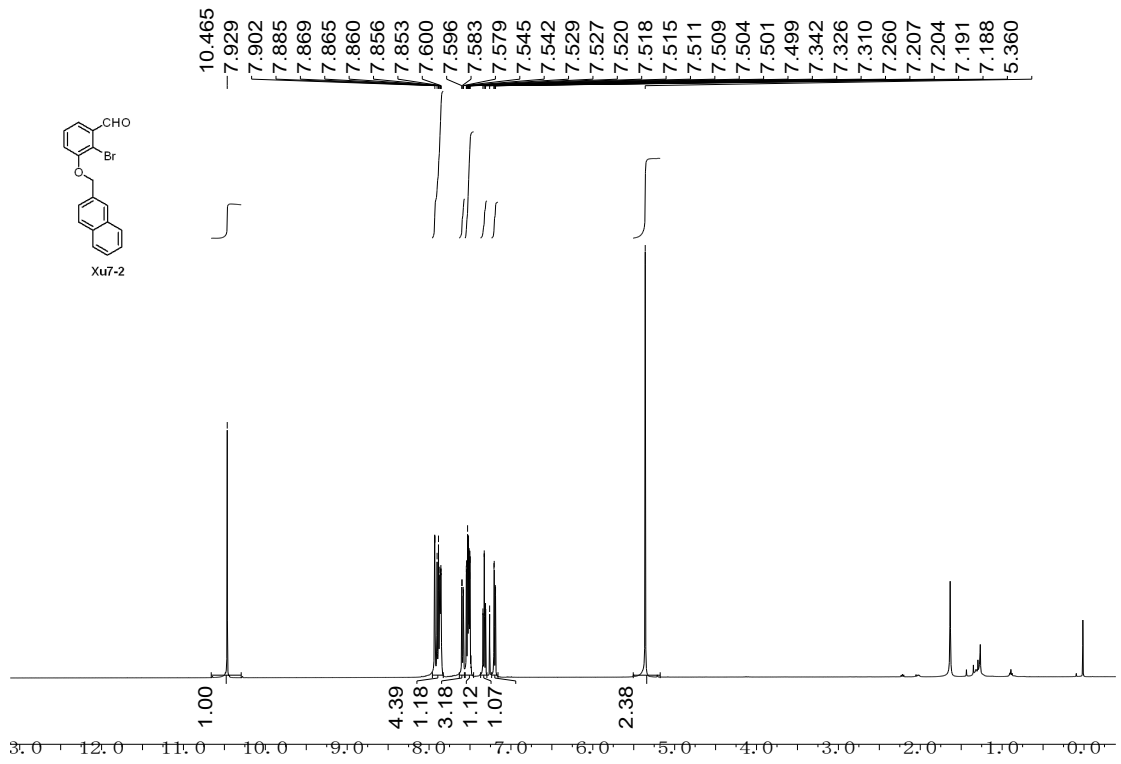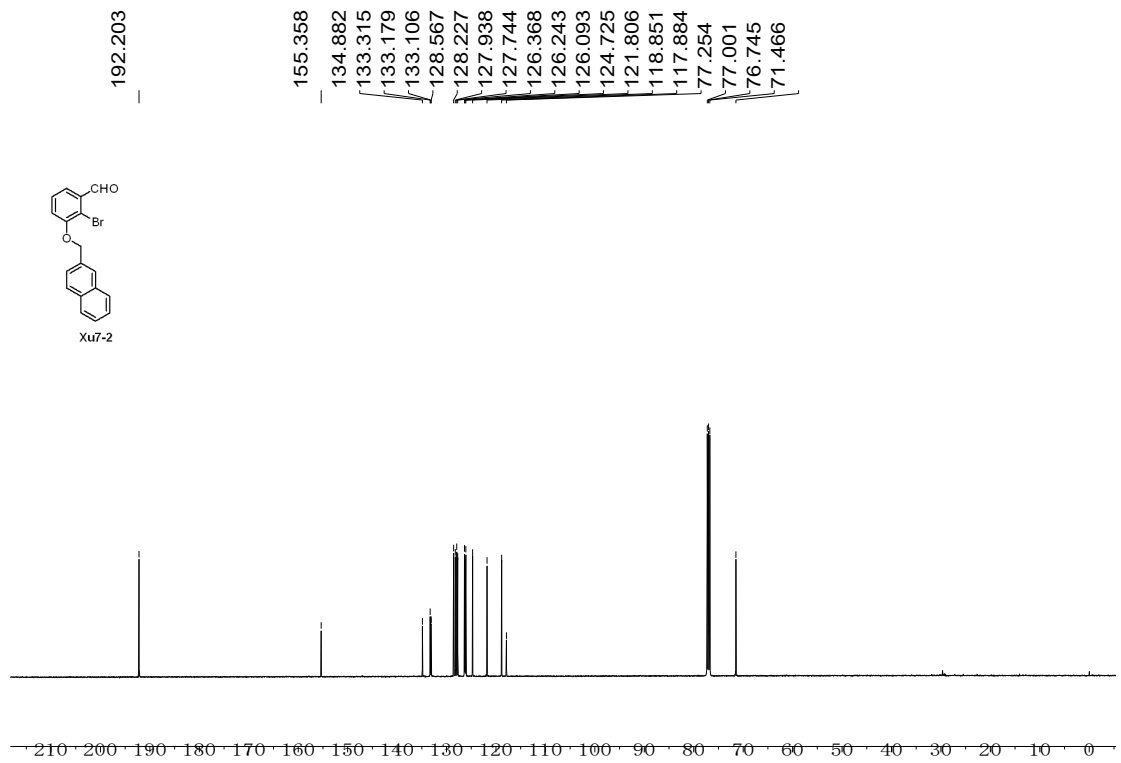

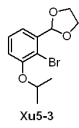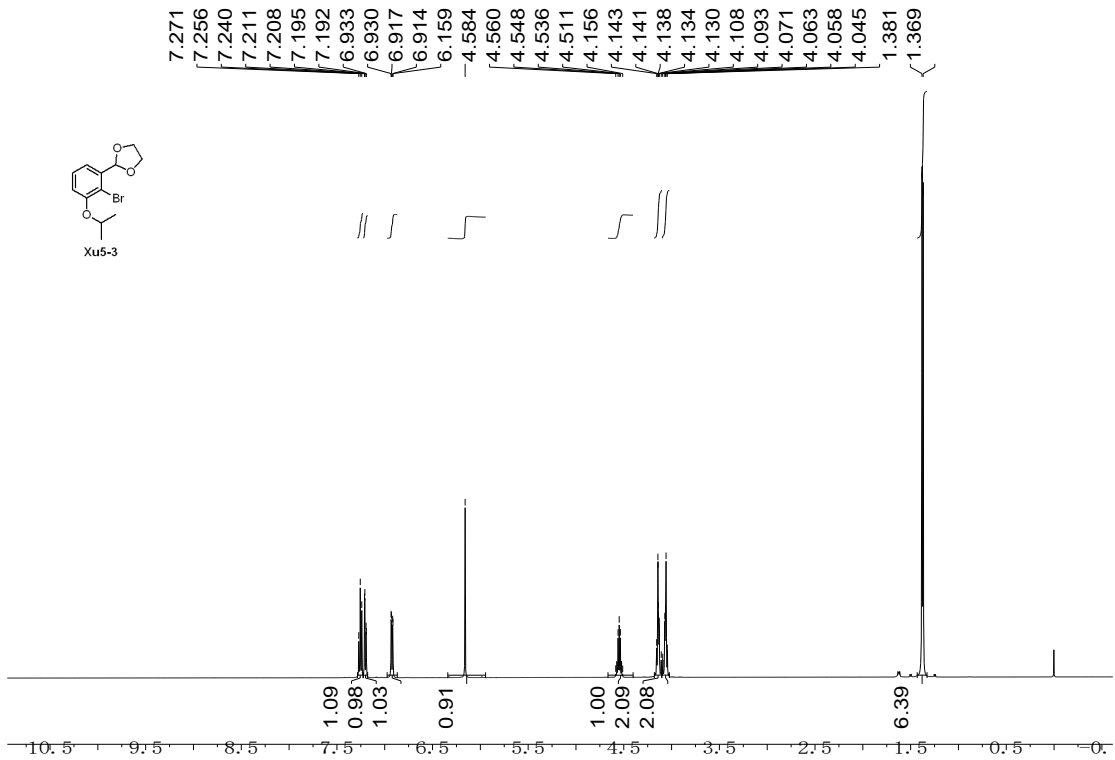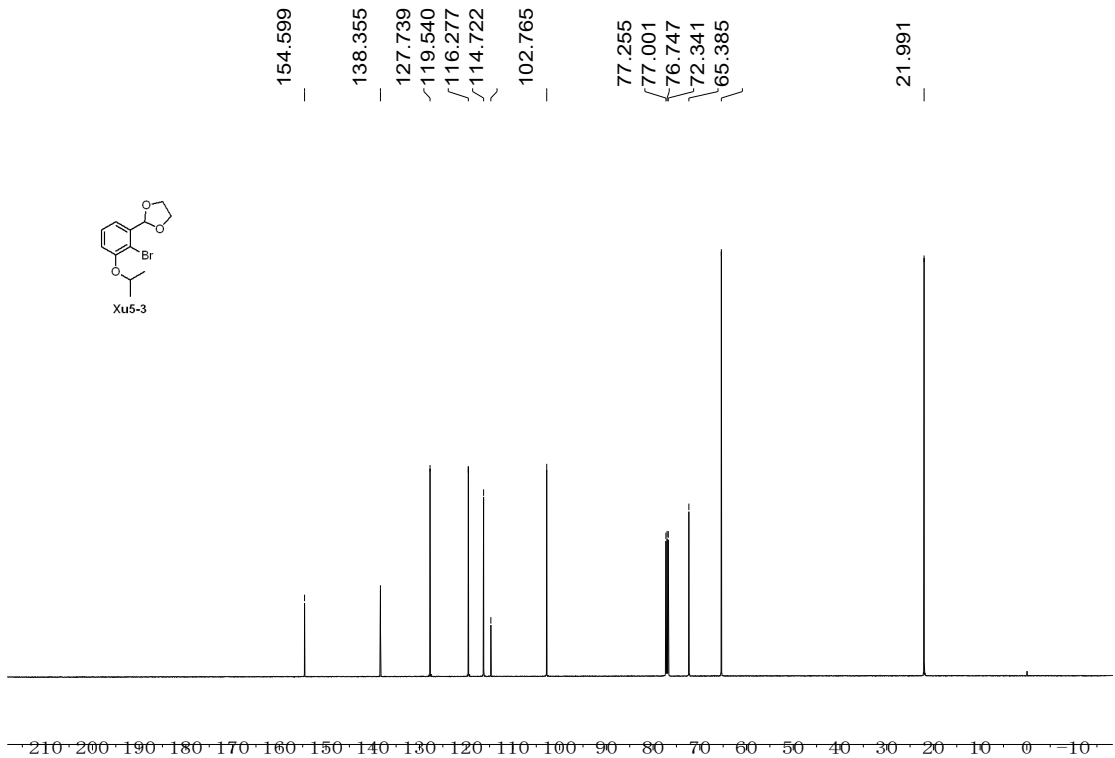



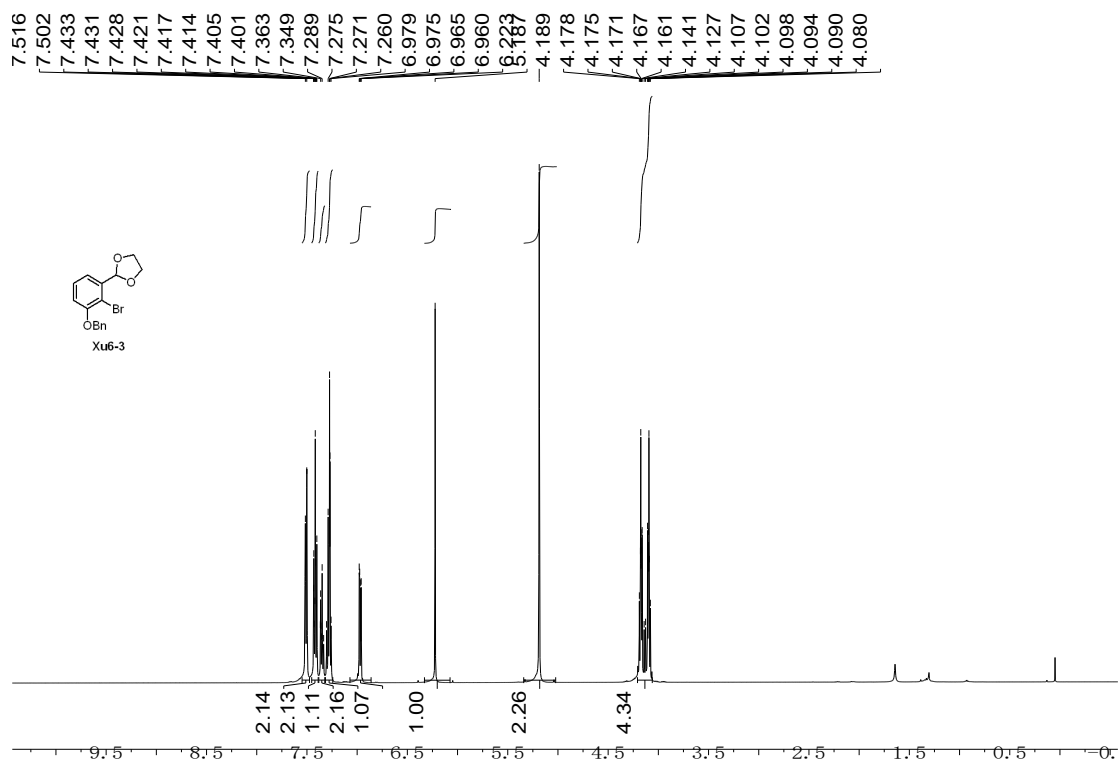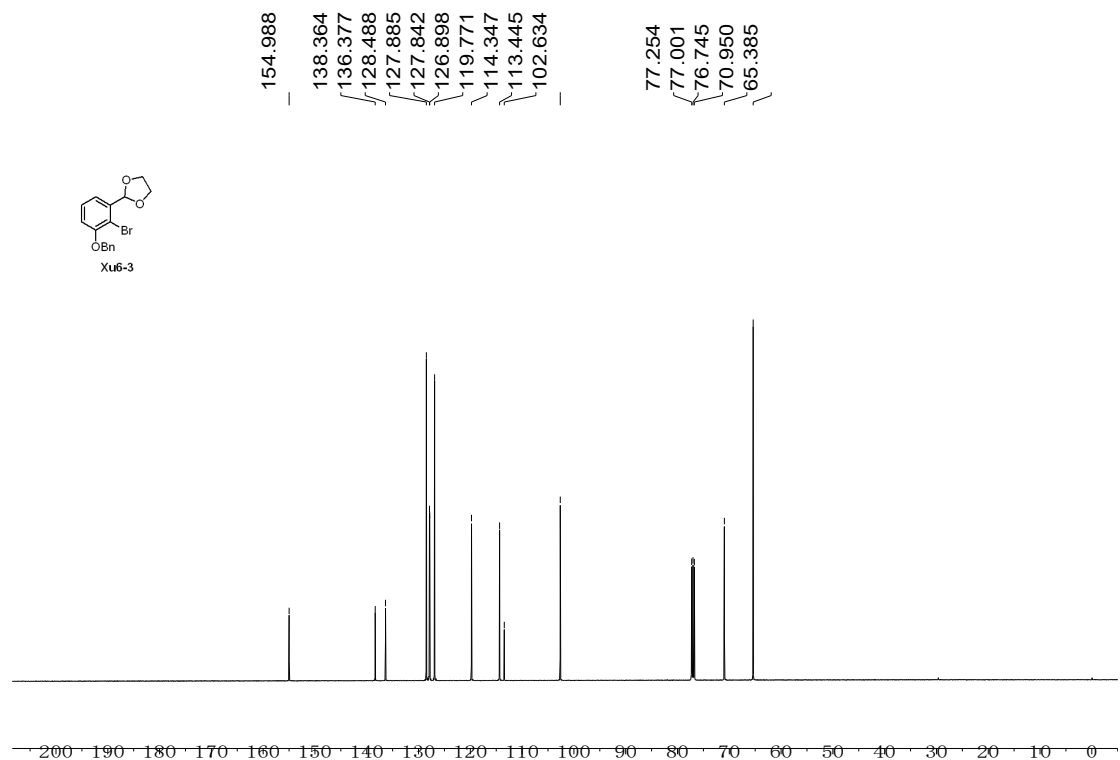

7.943  
7.900  
7.884  
7.878  
7.870  
7.866  
7.614  
7.611  
7.524  
7.521  
7.519  
7.513  
7.507  
7.505  
7.502  
7.279  
7.276  
7.268  
7.007  
6.237  
5.388  
4.177  
4.174  
4.170  
4.166  
4.160  
4.141  
4.127  
4.108  
4.102  
4.098  
4.094  
4.091  
4.080

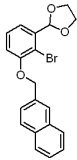

Xu7-3

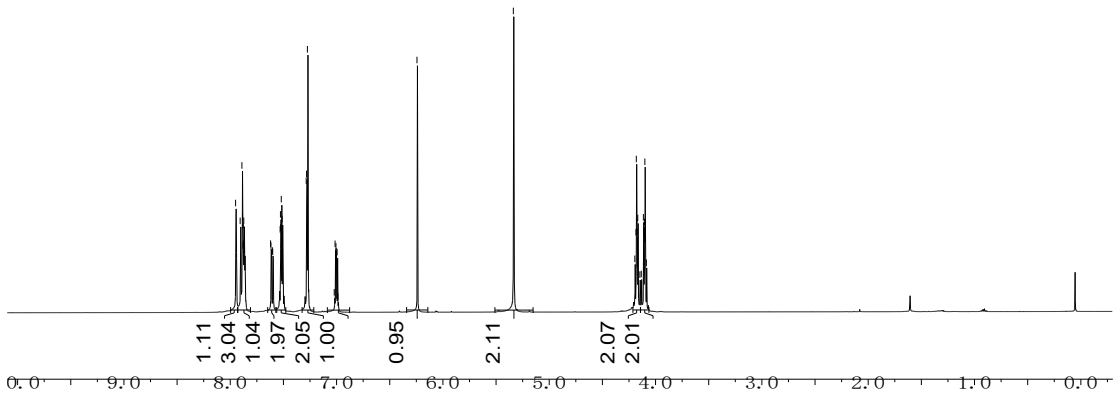

155.055  
138.420  
133.881  
133.177  
132.996  
128.366  
127.928  
127.676  
126.187  
126.017  
125.874  
124.778  
119.854  
114.480  
113.505  
102.669  
77.254  
77.000  
76.746  
71.200  
65.412

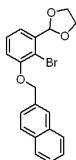

Xu7-3

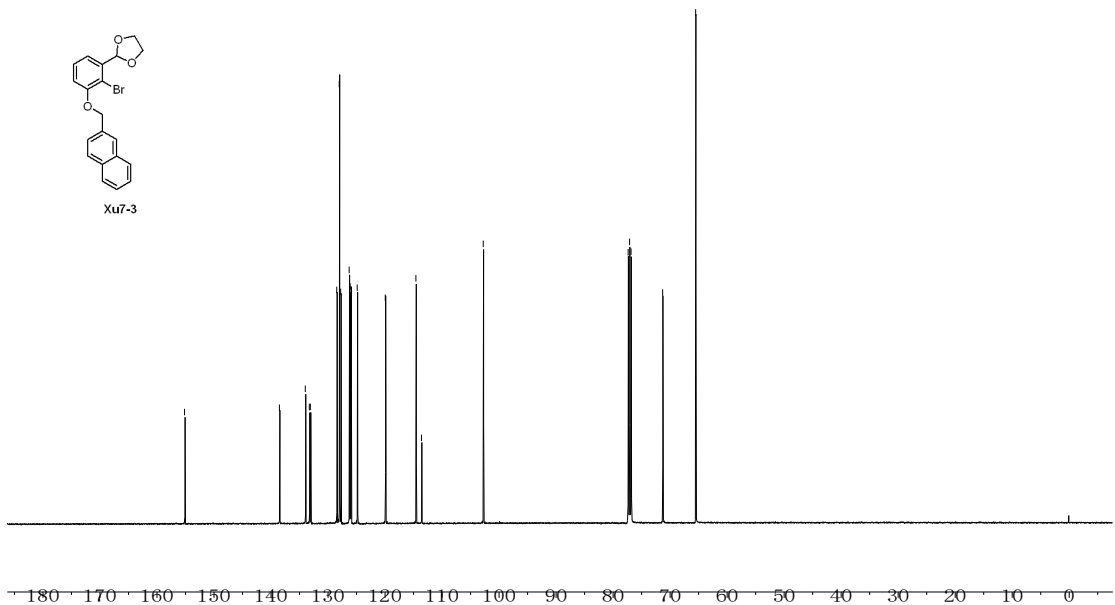

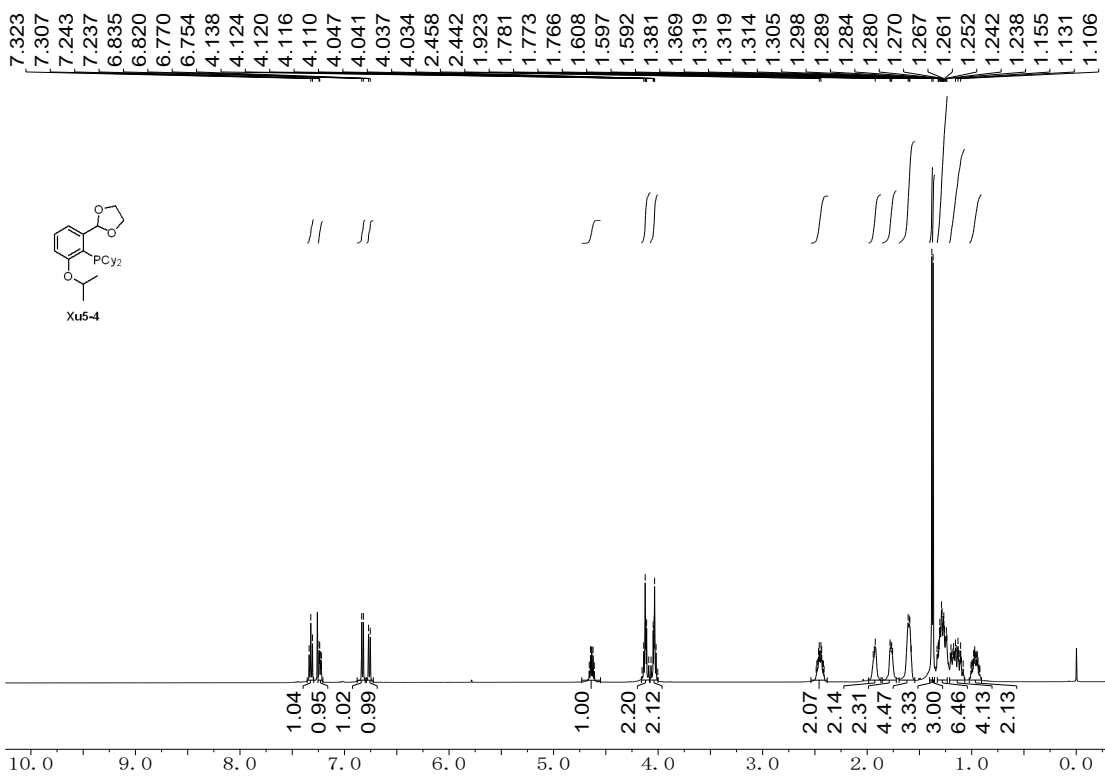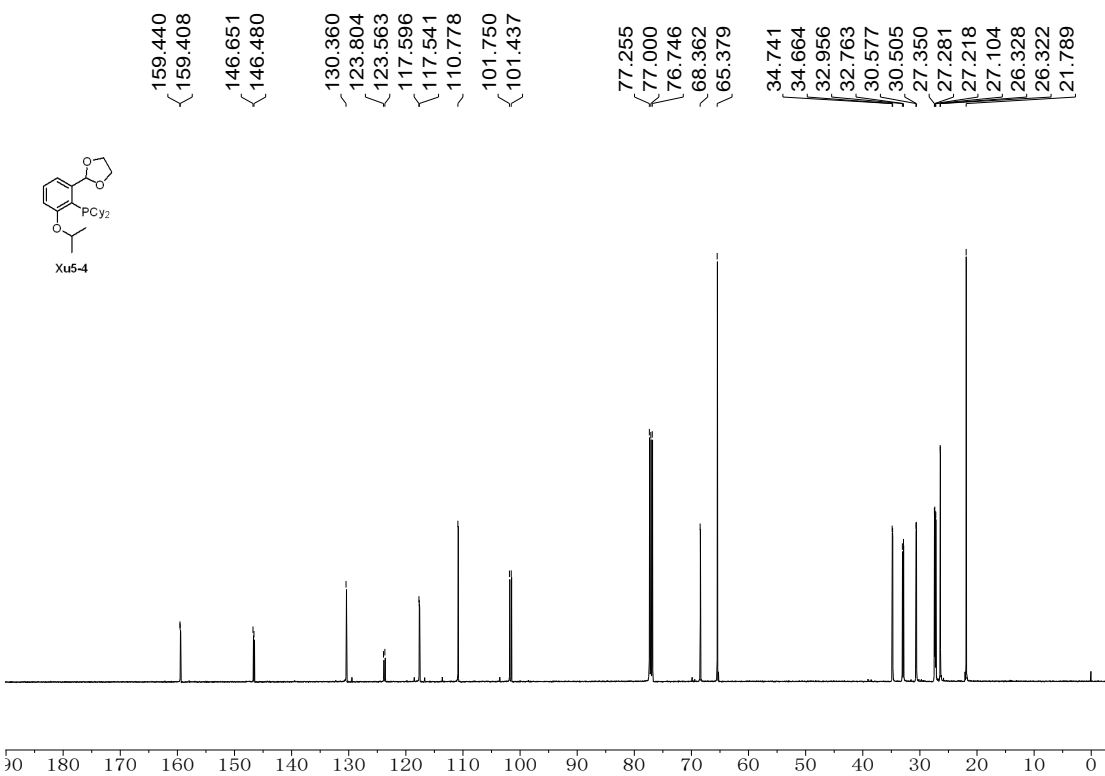

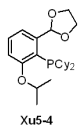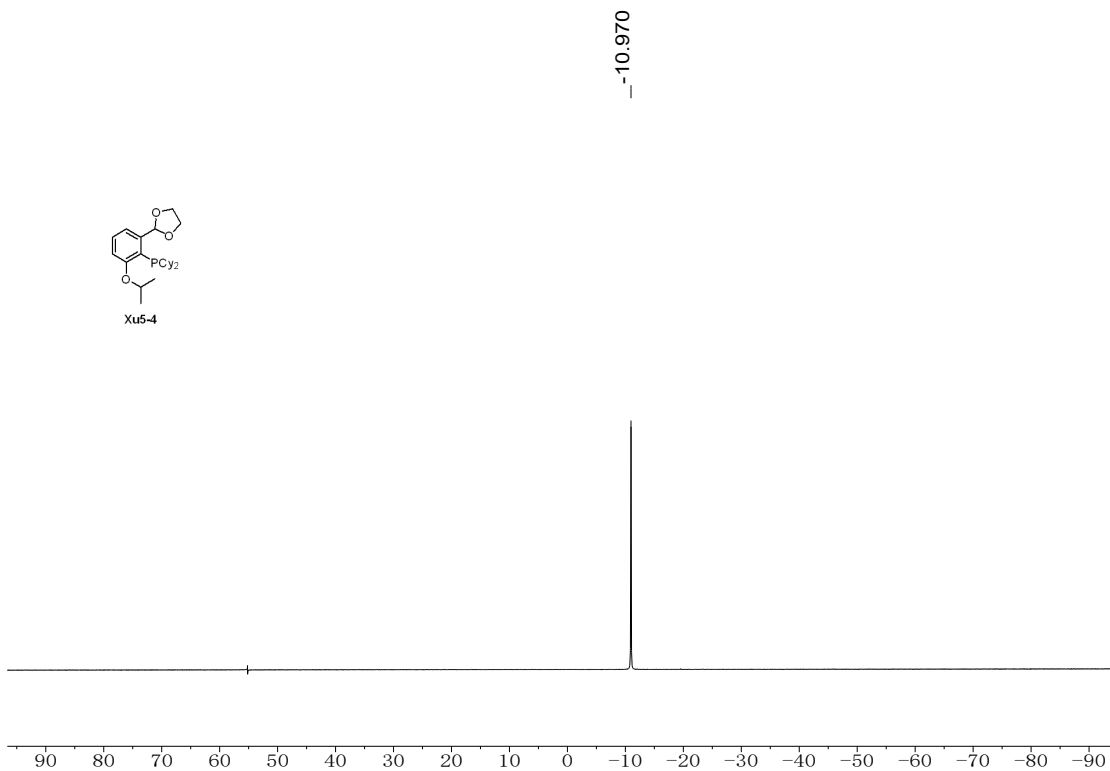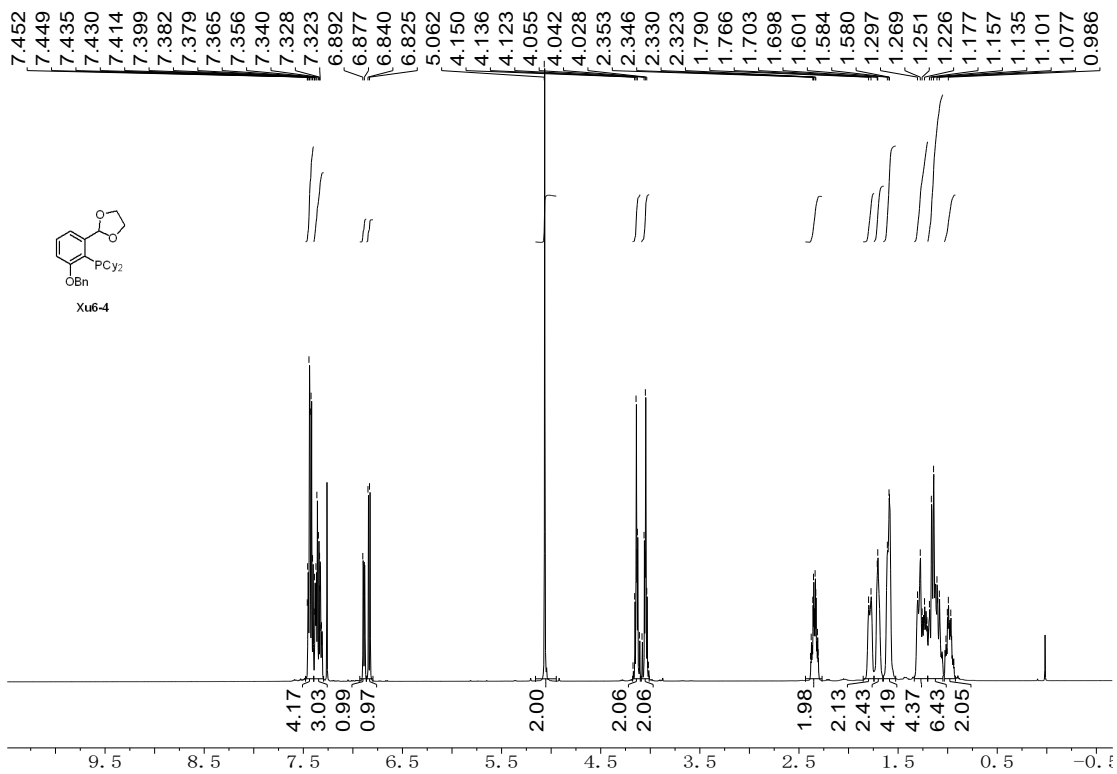

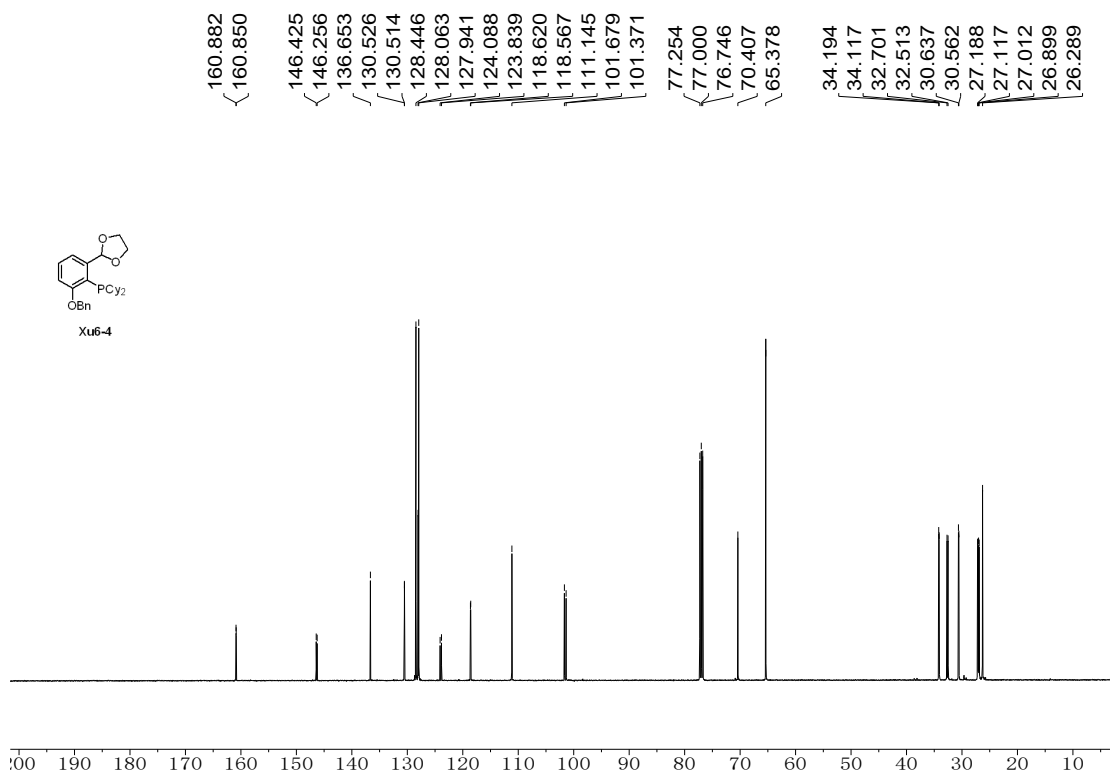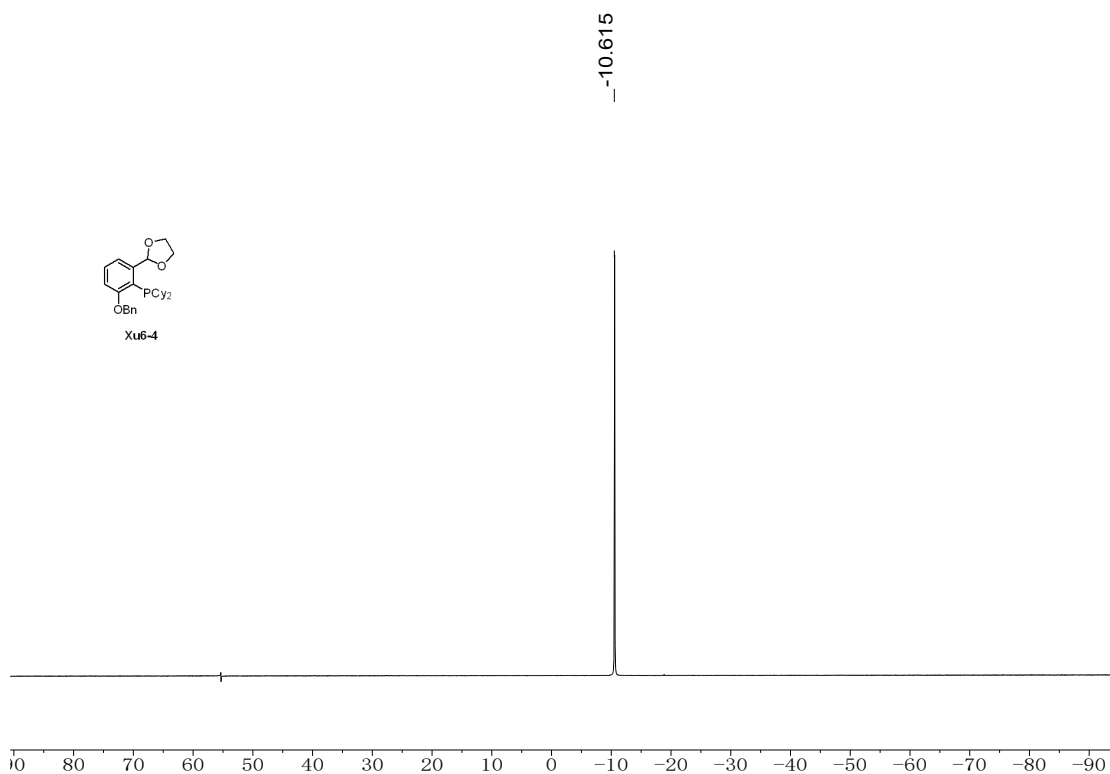

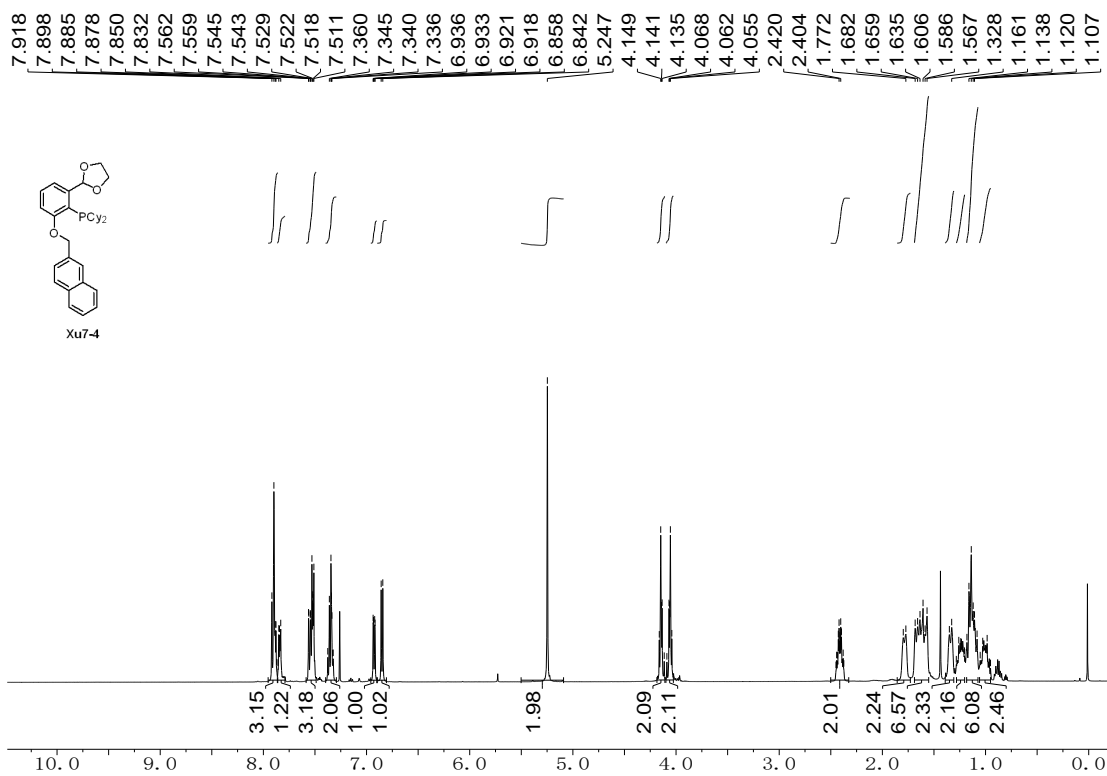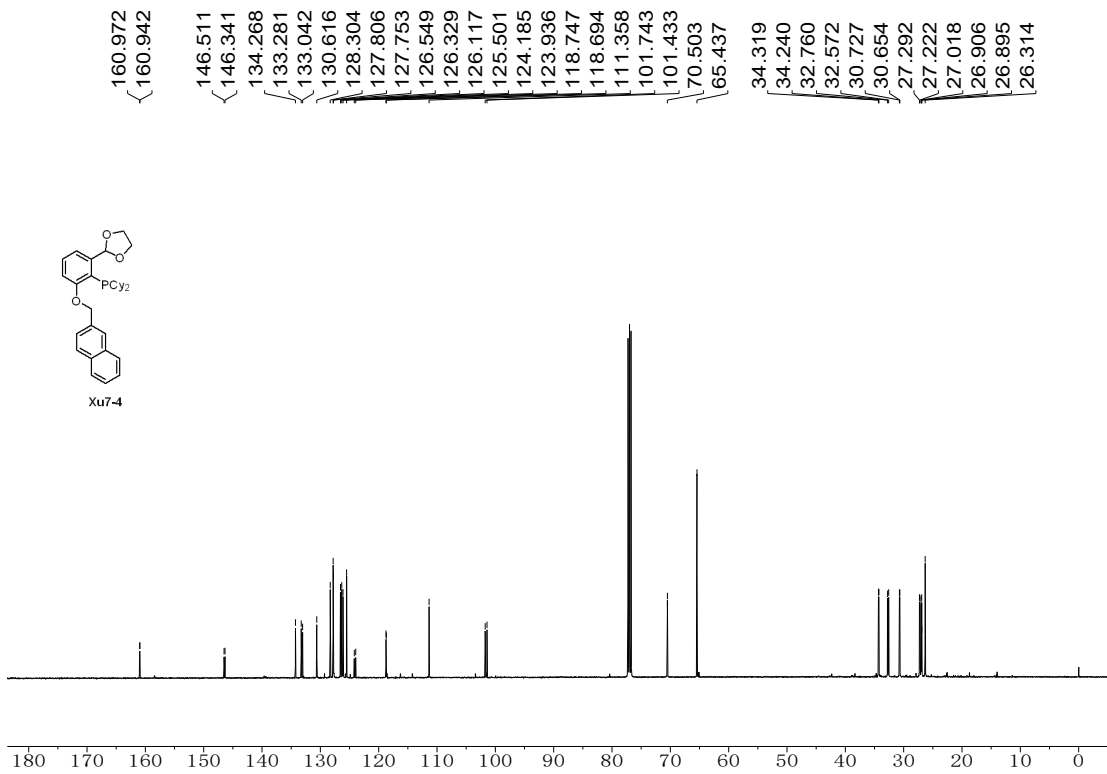

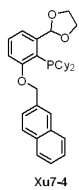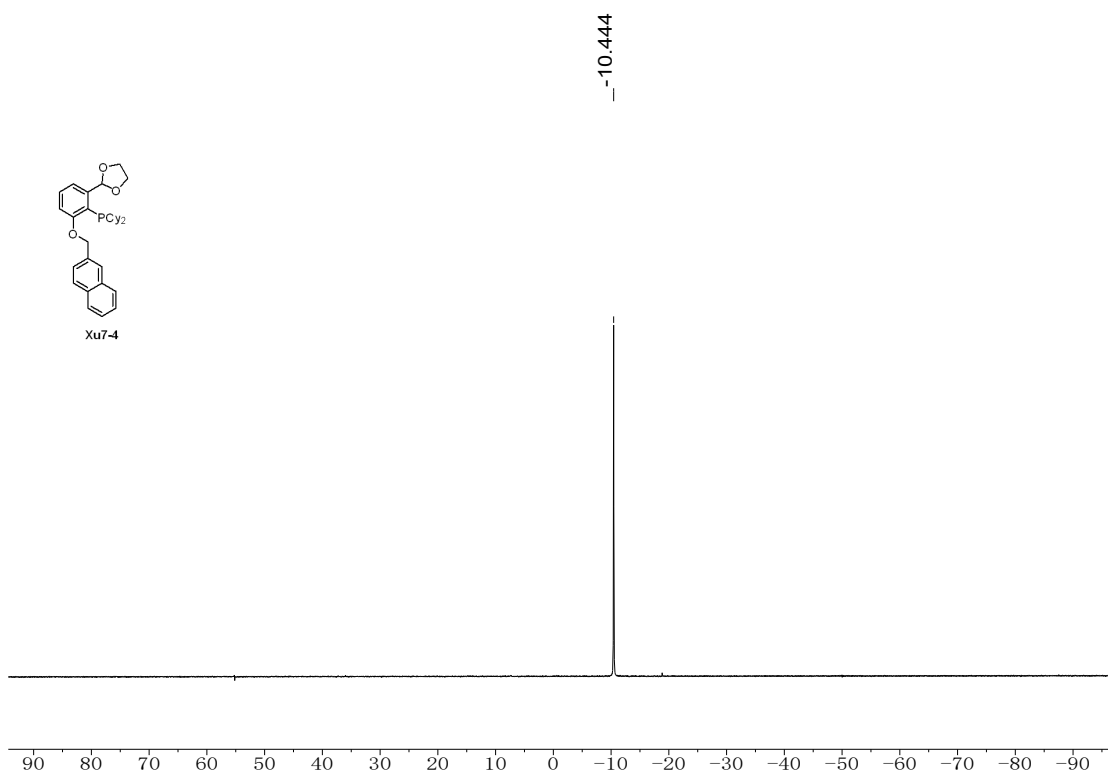

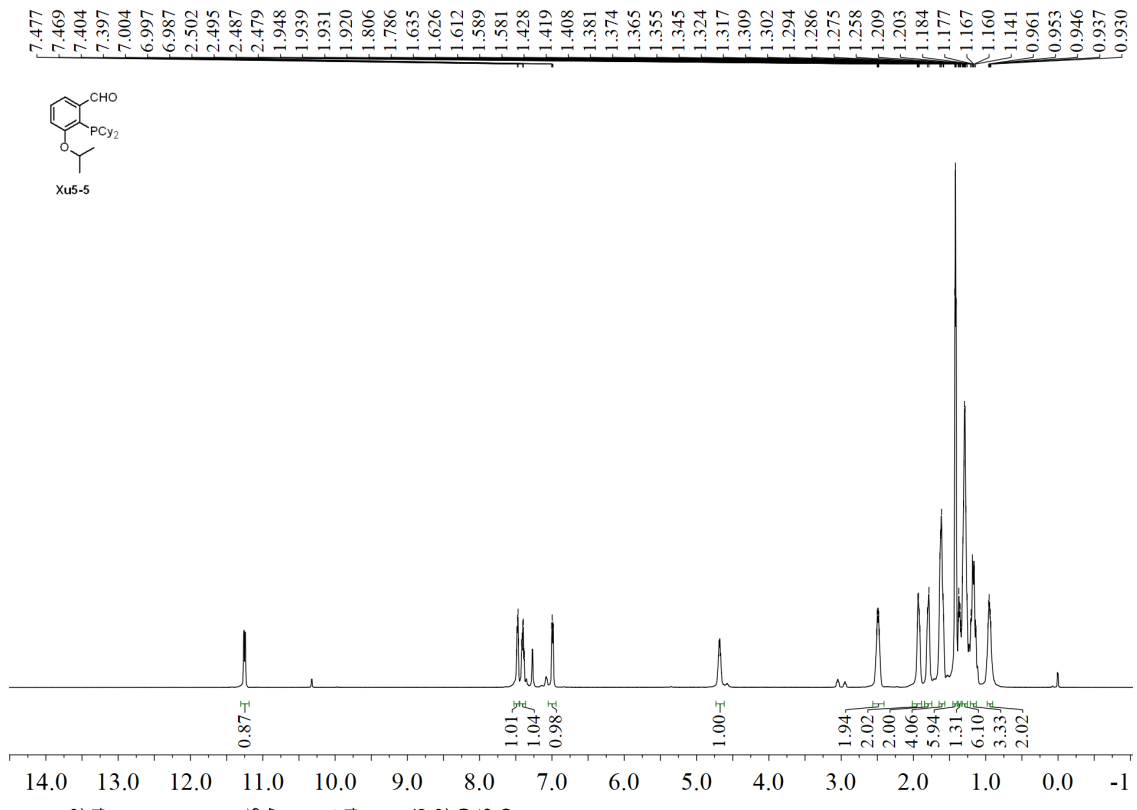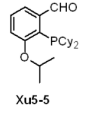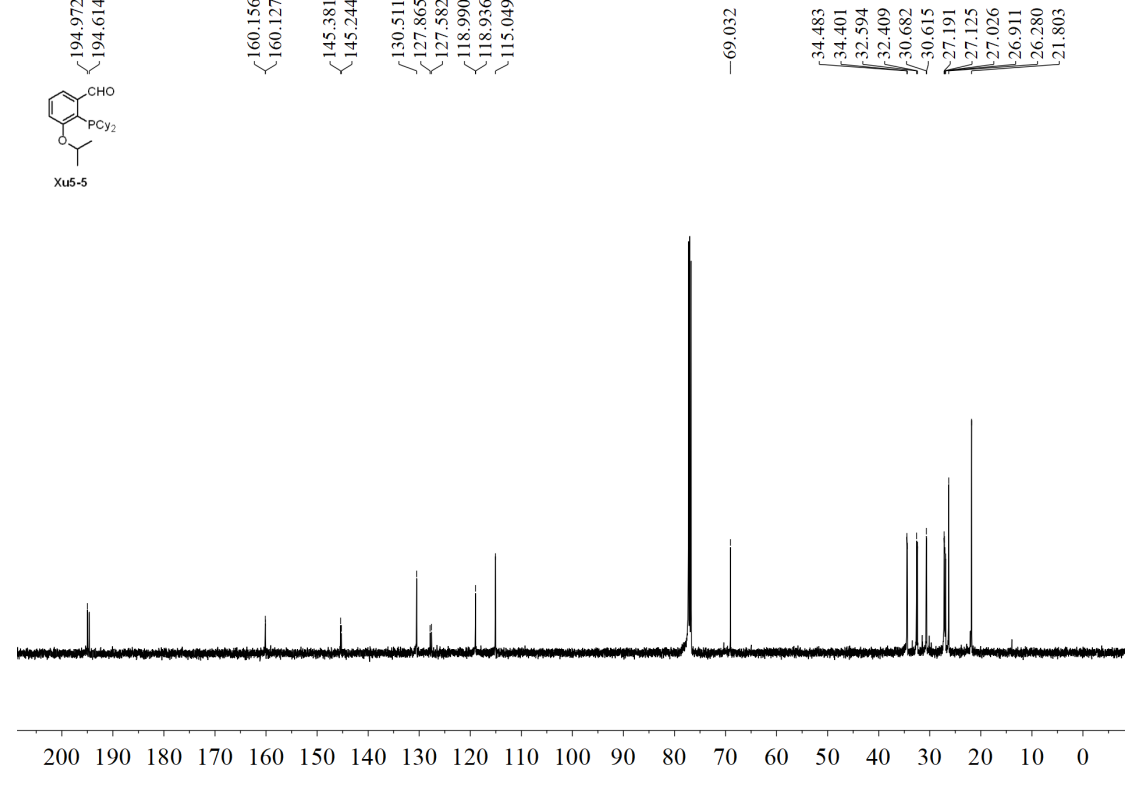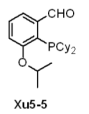



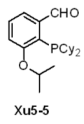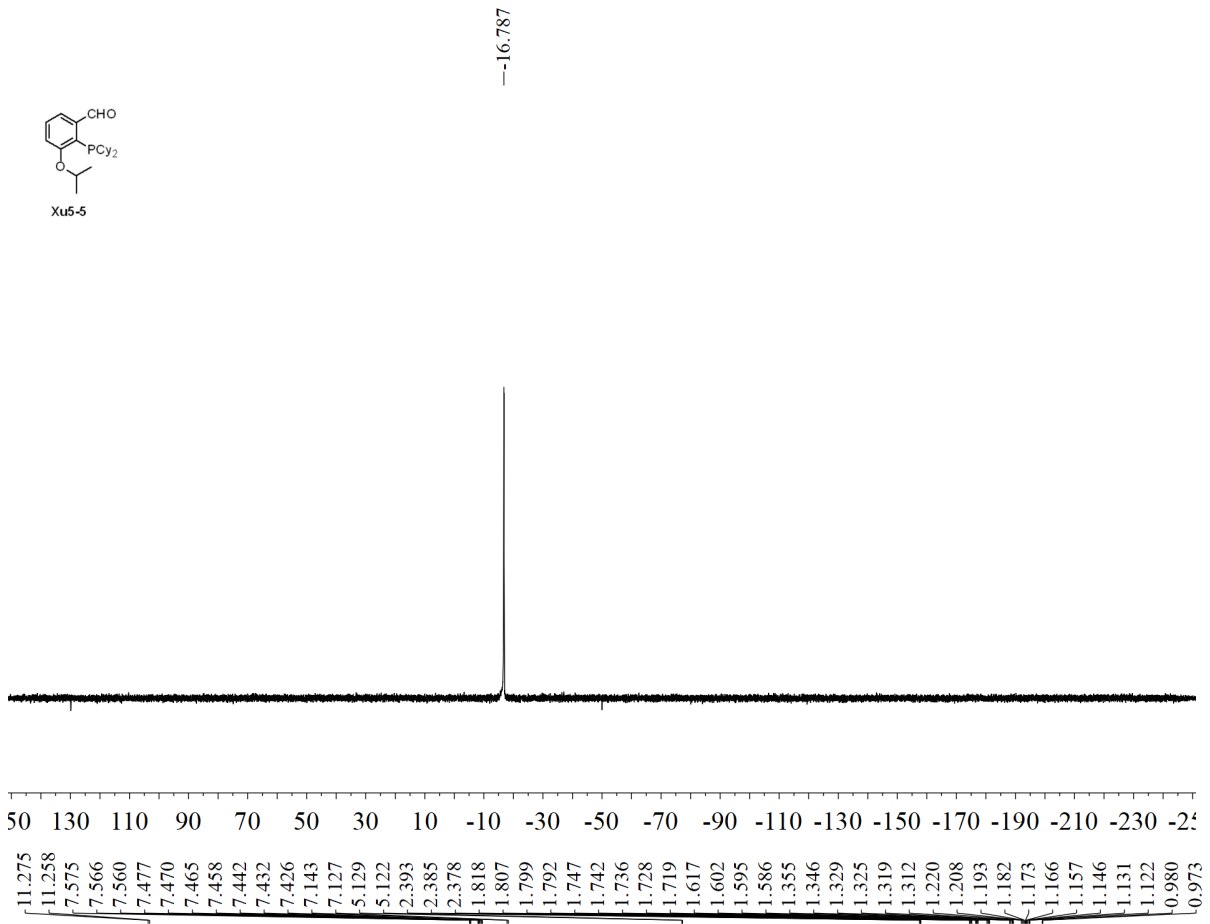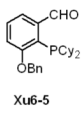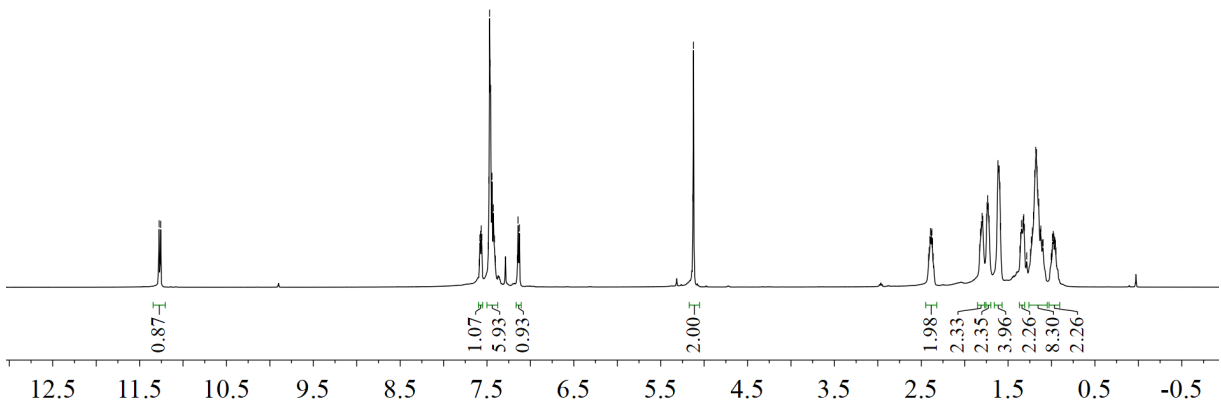

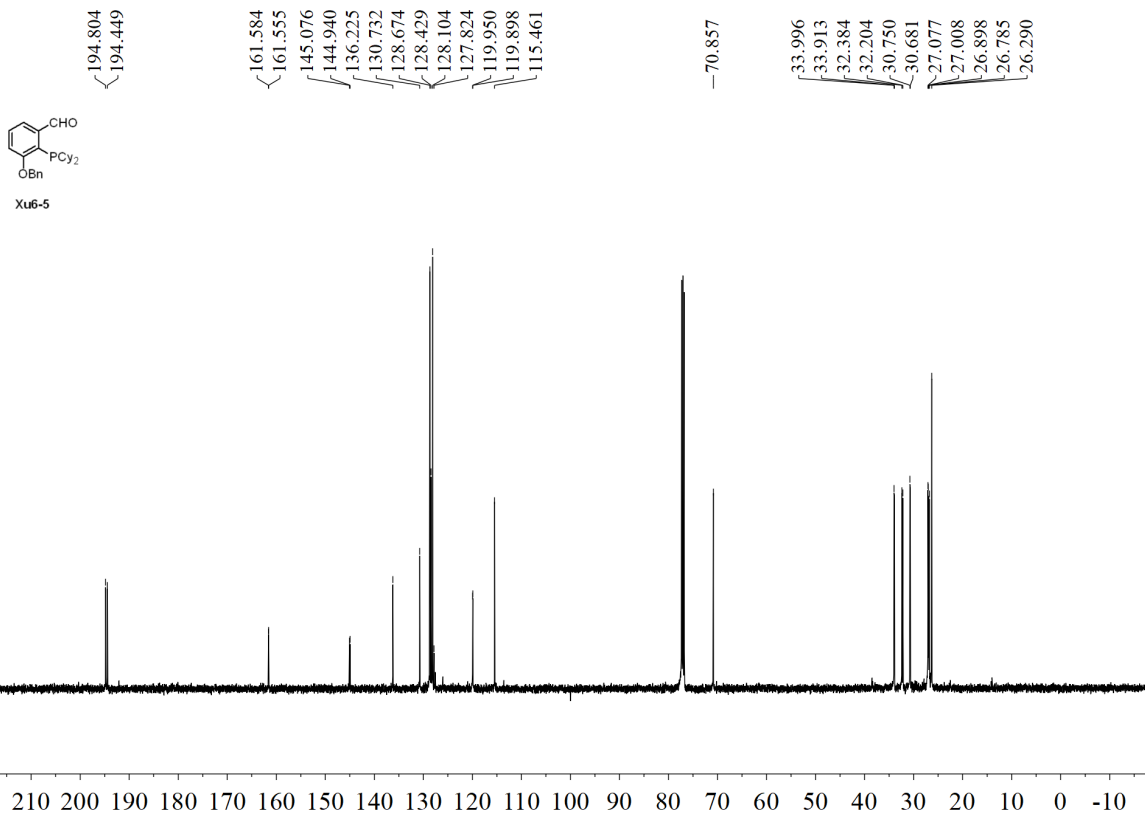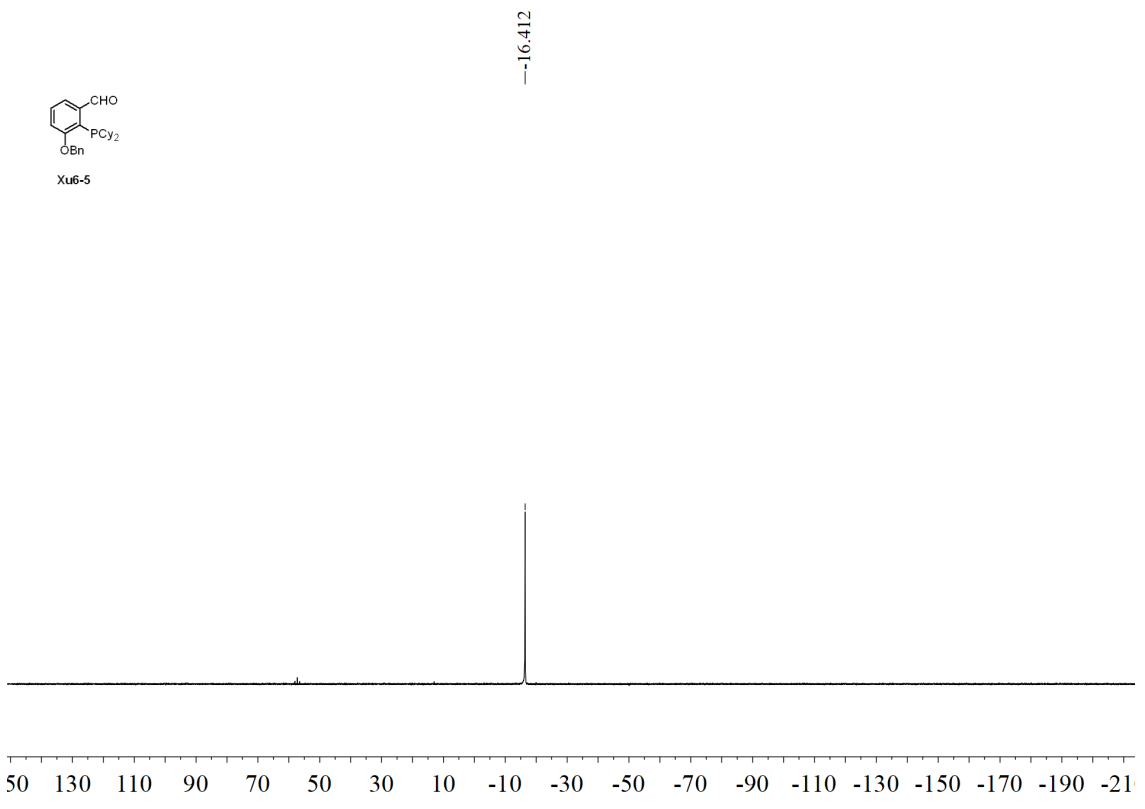

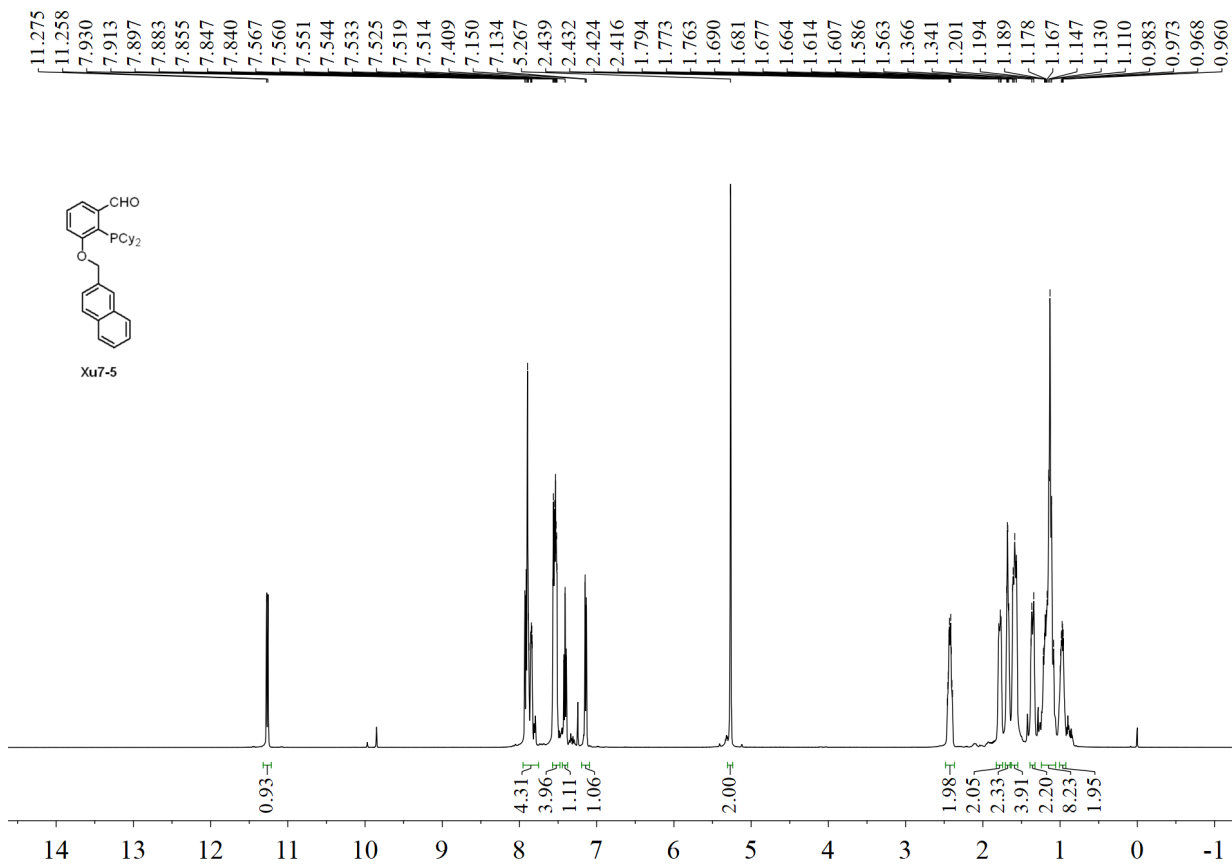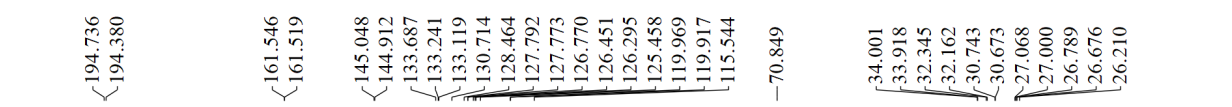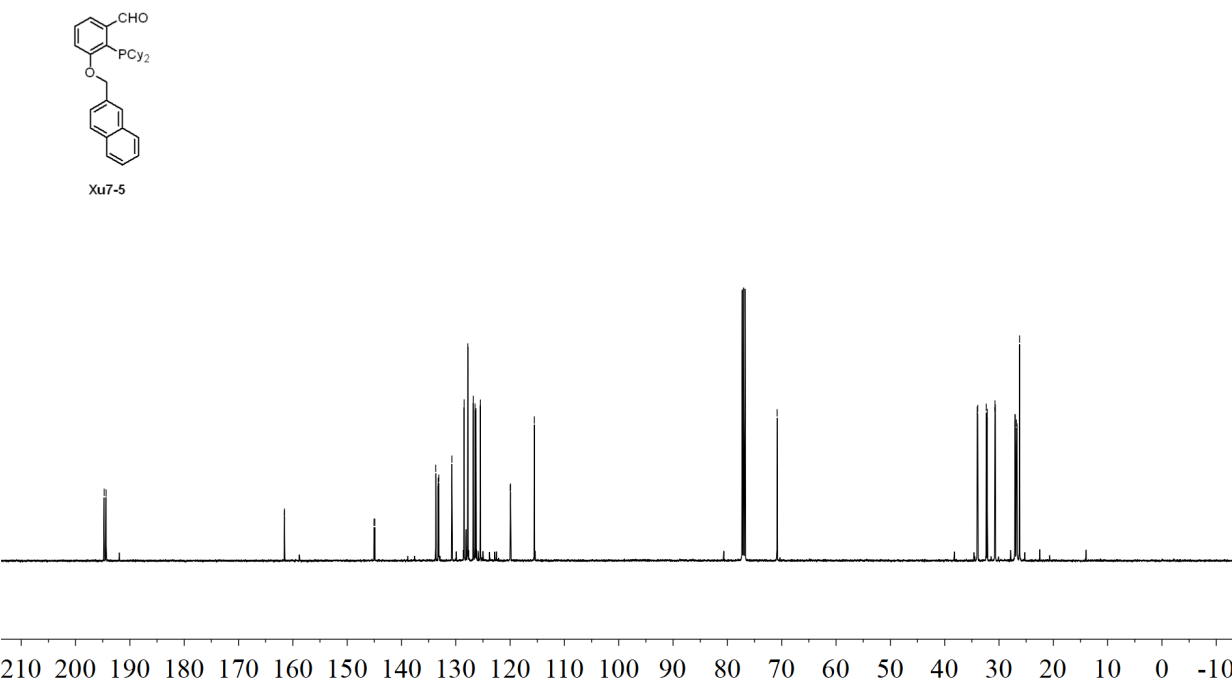

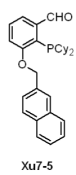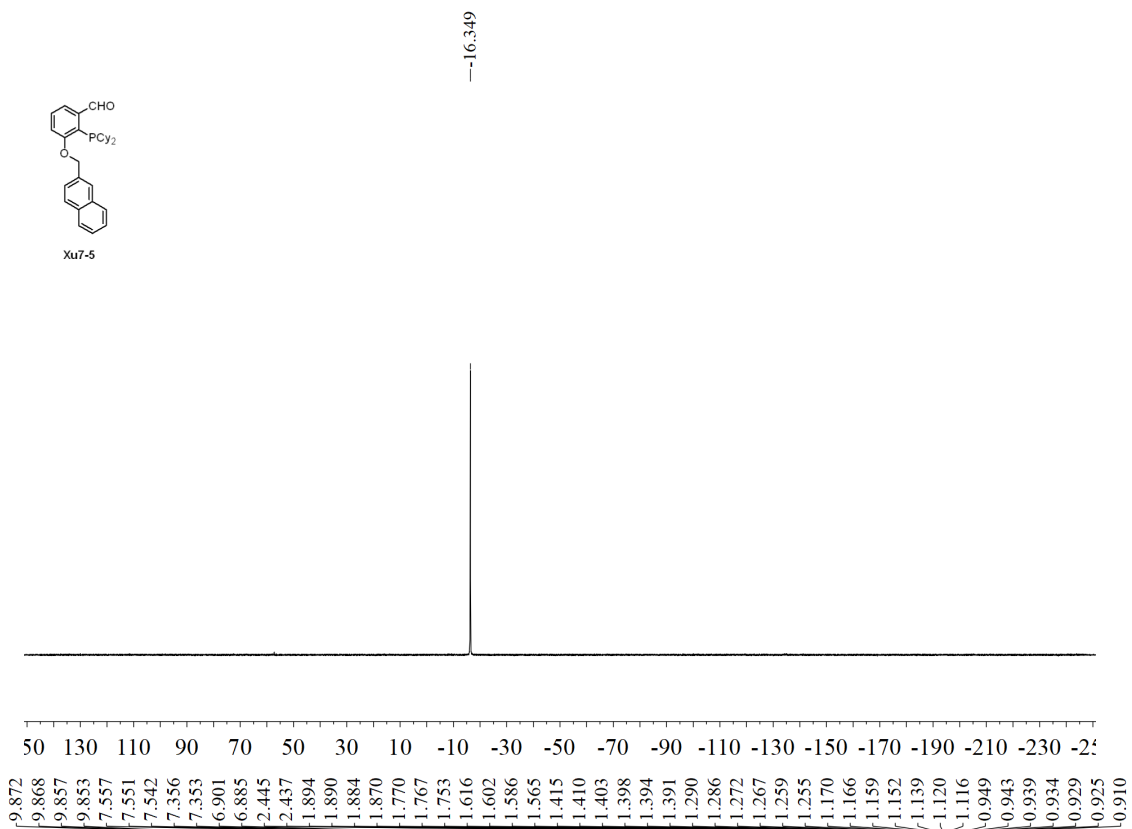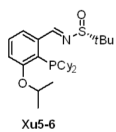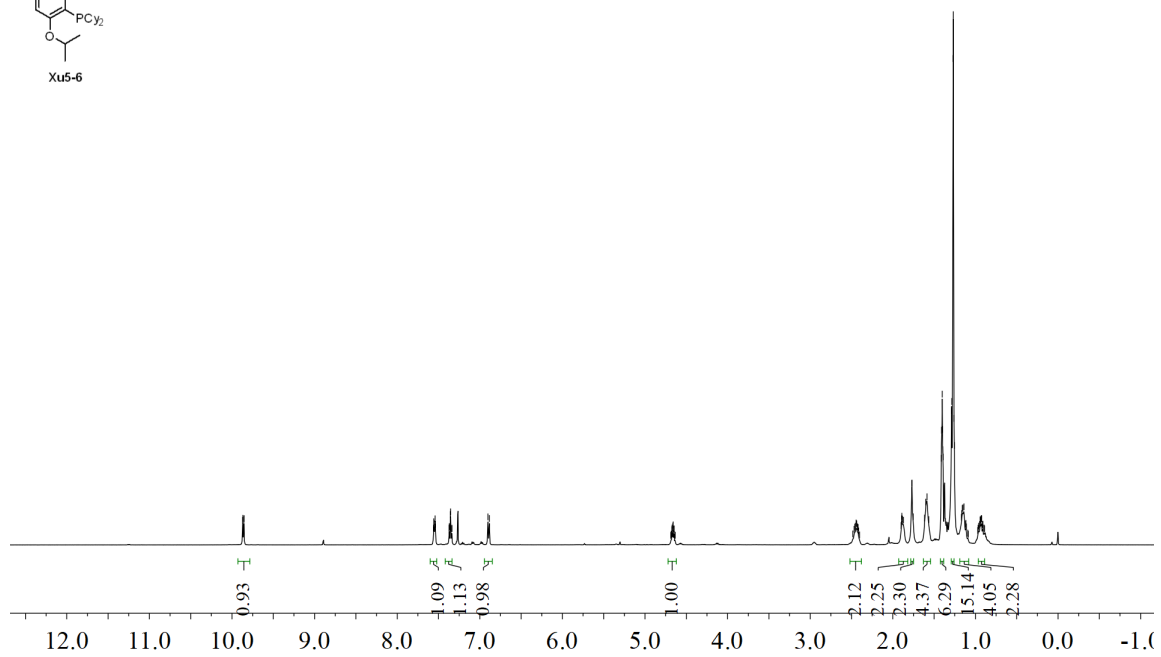

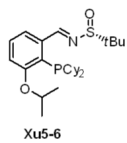

165.143  
 164.815  
 160.144  
 160.116  
 143.922  
 143.749  
 130.270  
 127.219  
 126.949  
 119.585  
 119.535  
 113.139  
 -68.818  
 -57.729  
 34.674  
 34.583  
 32.437  
 32.401  
 32.212  
 30.603  
 30.533  
 30.463  
 30.396  
 27.285  
 27.250  
 27.219  
 26.315  
 22.741  
 21.813  
 21.768

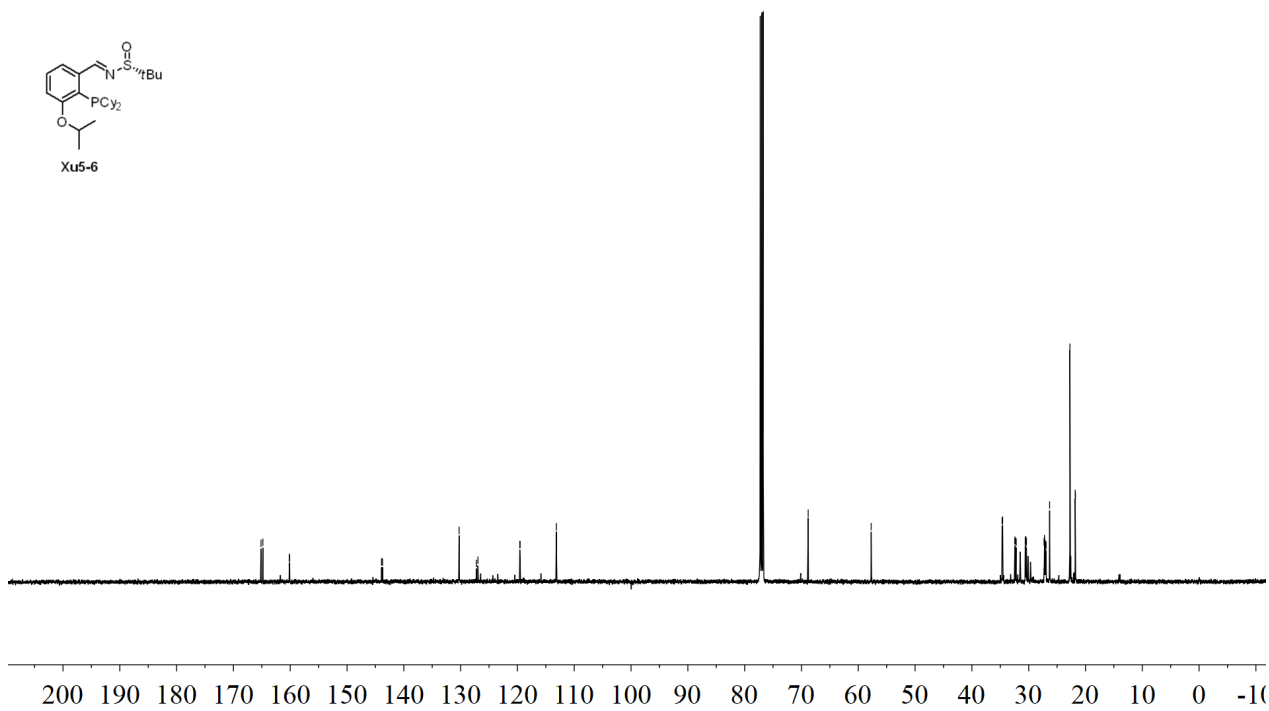

--12.133

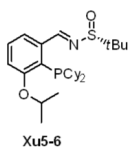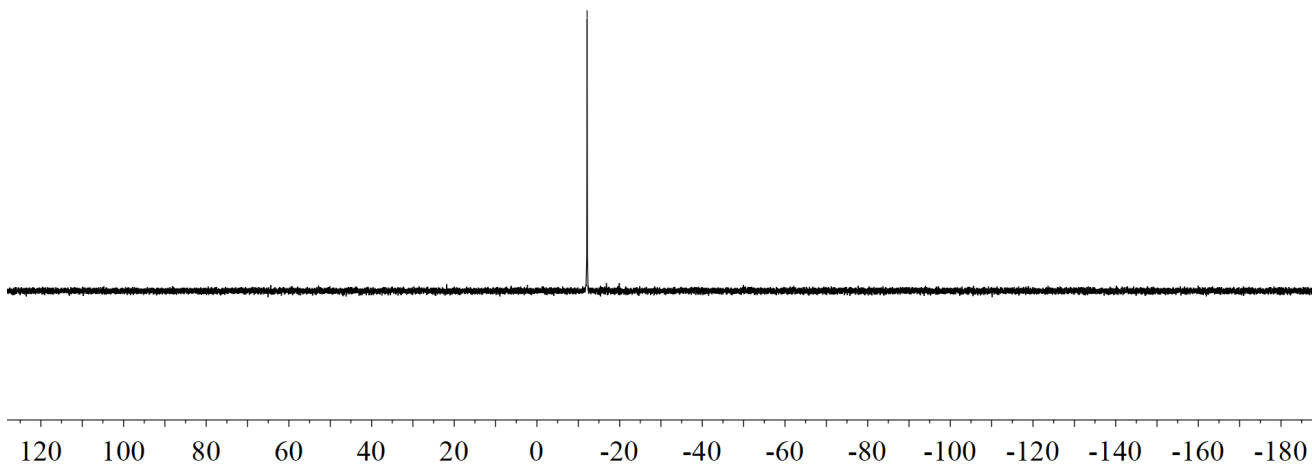

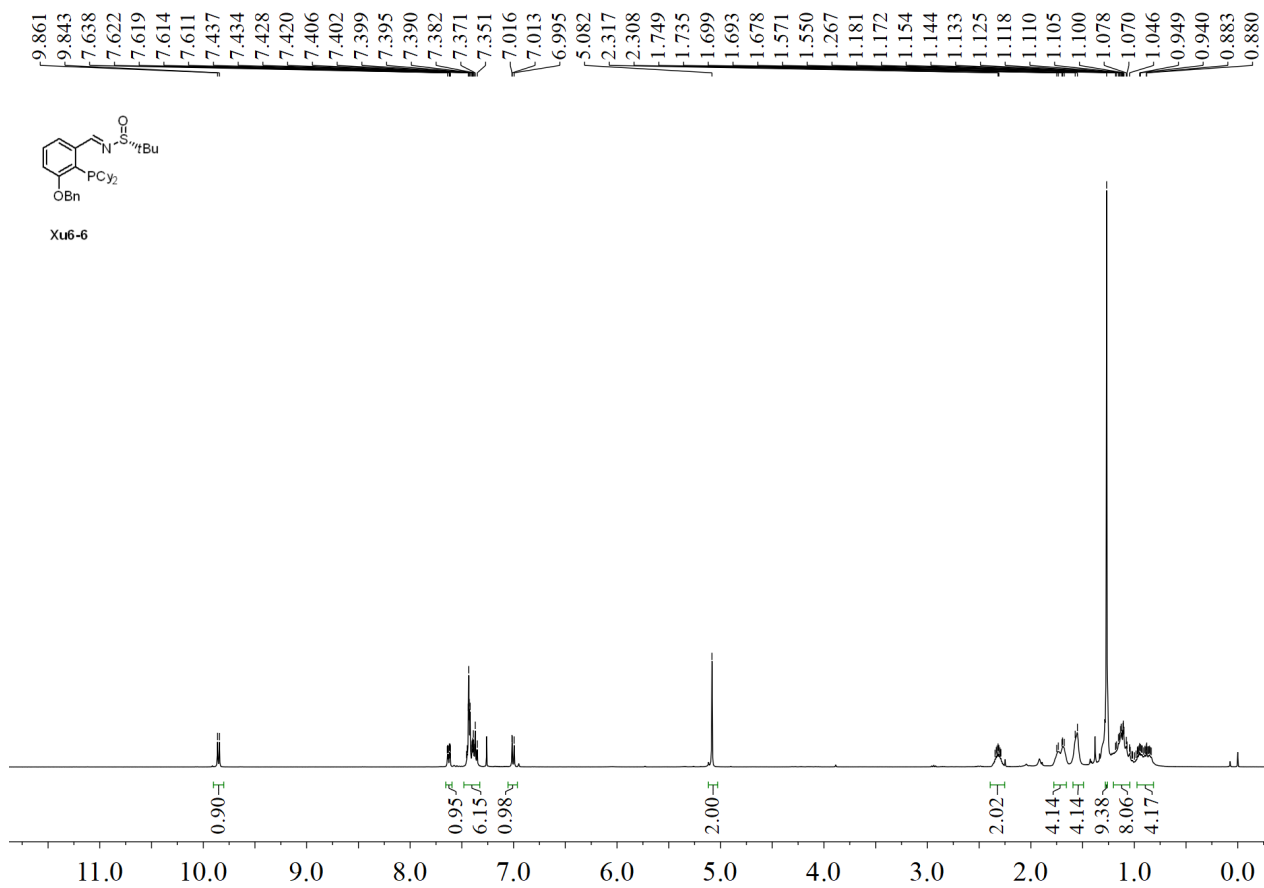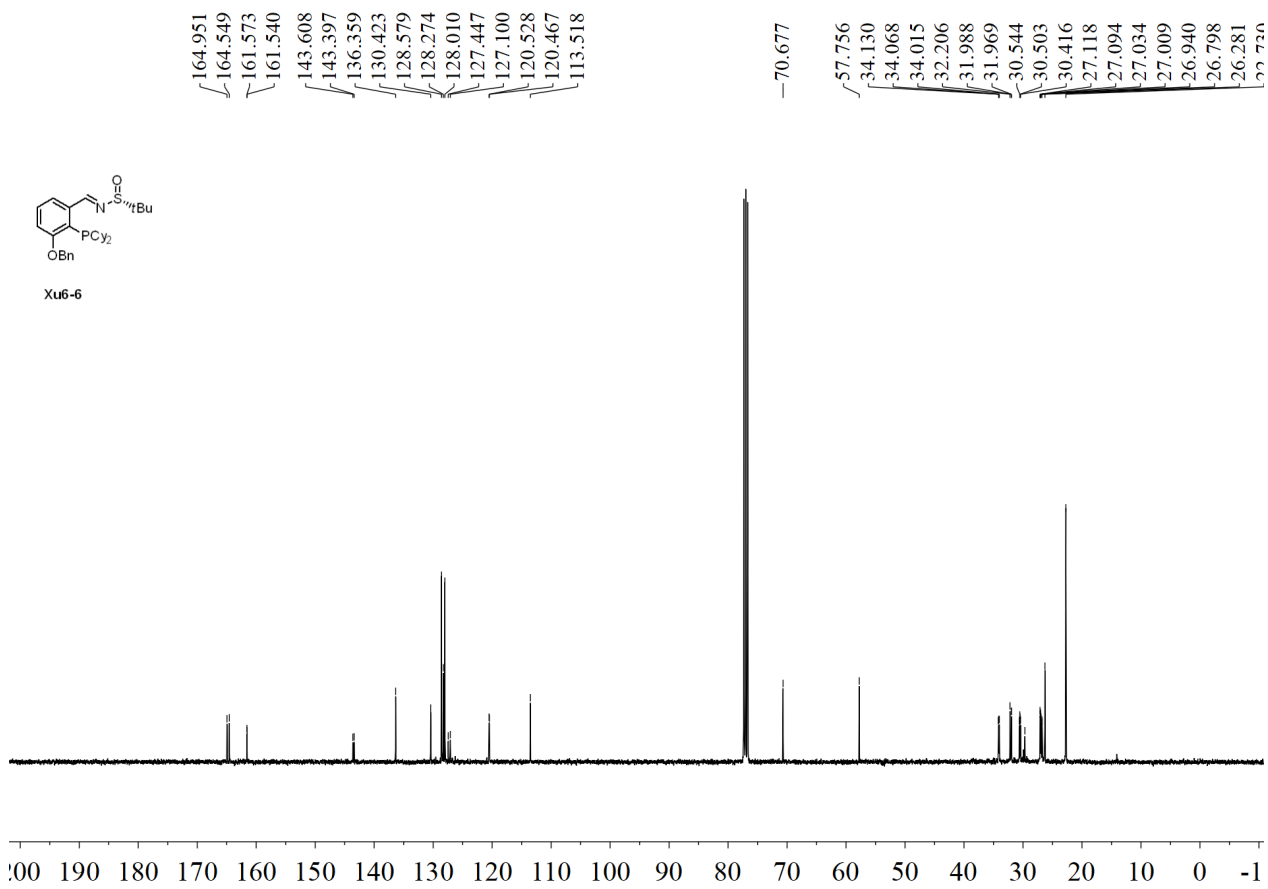

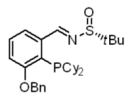

Xu6-6

--11.789

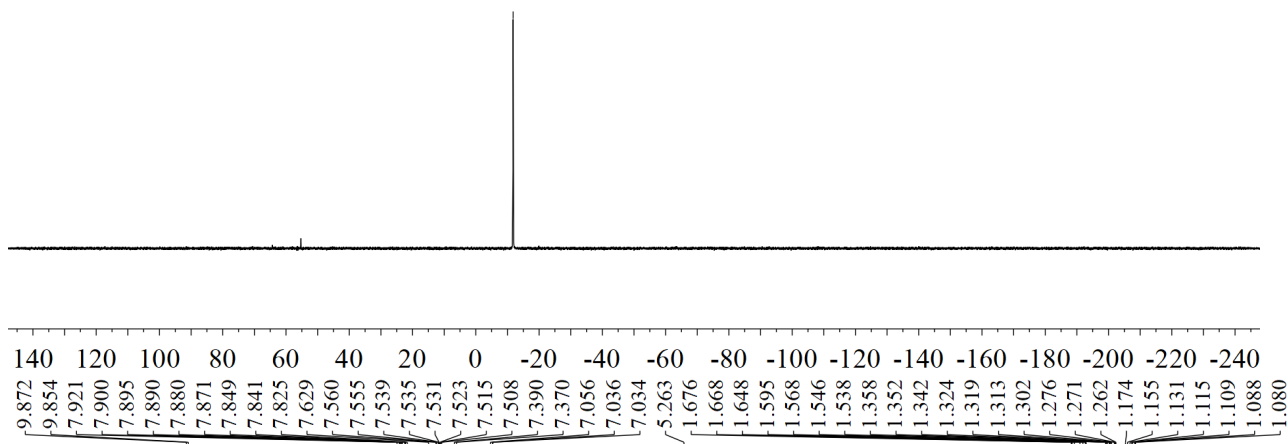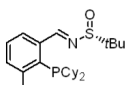

Xu7-6

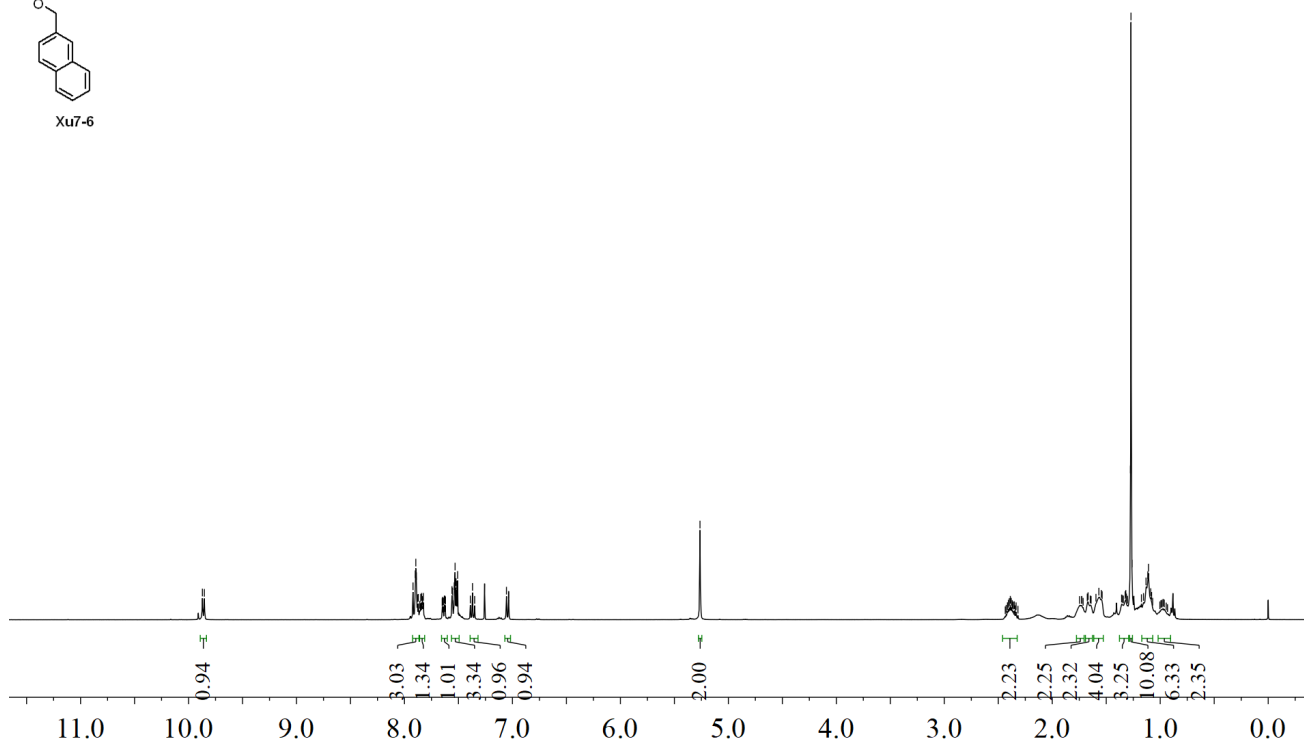

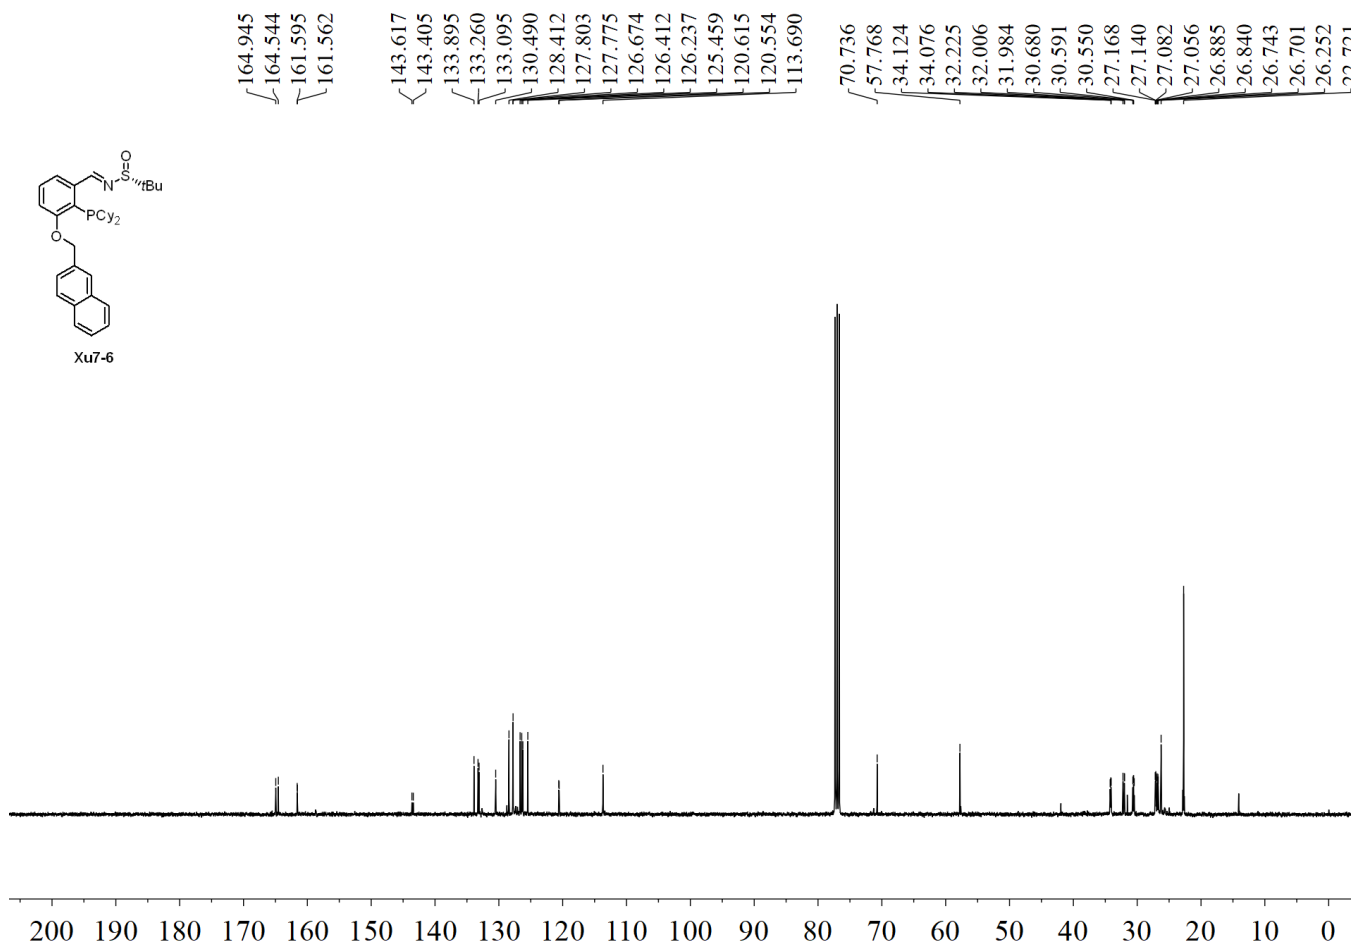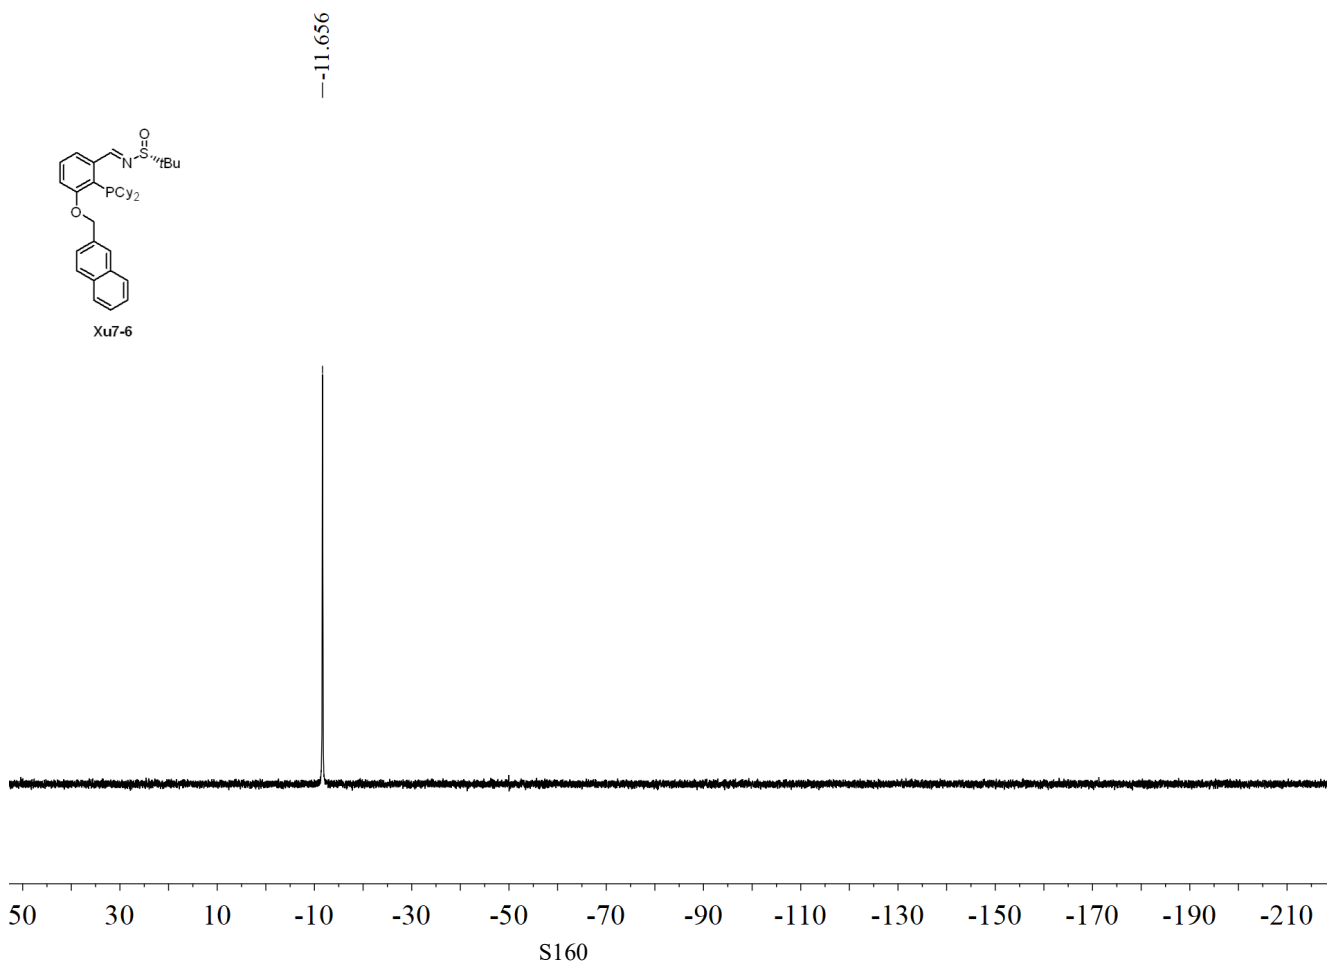



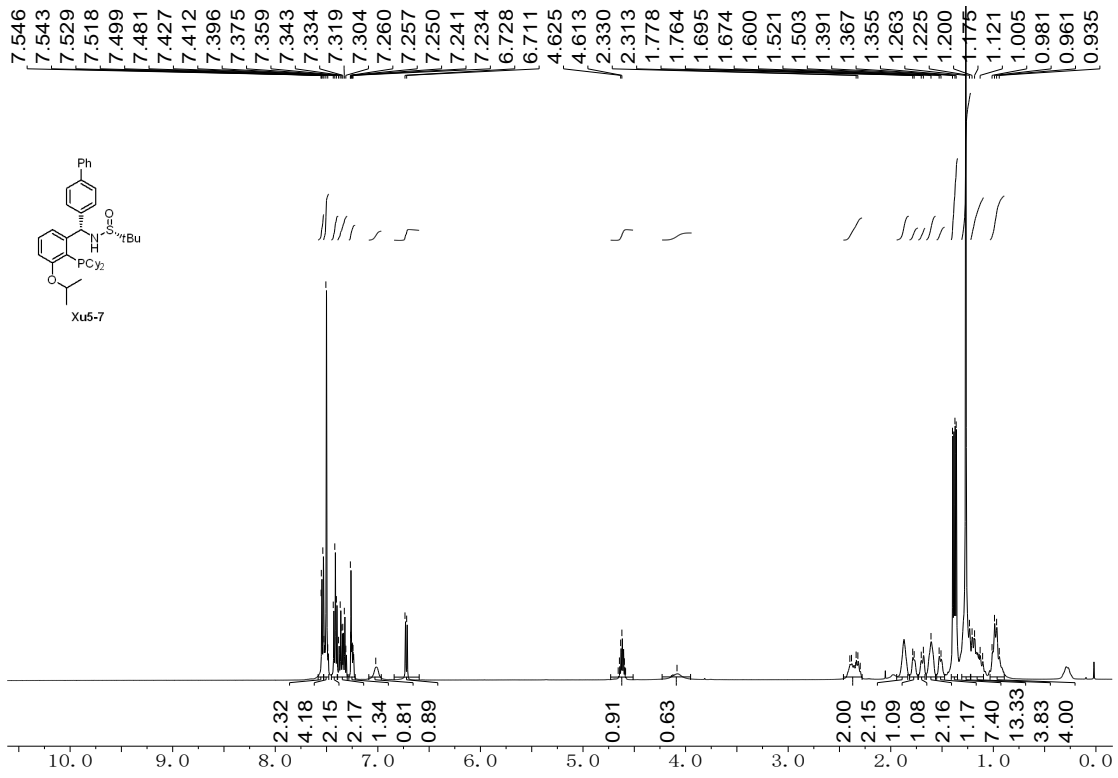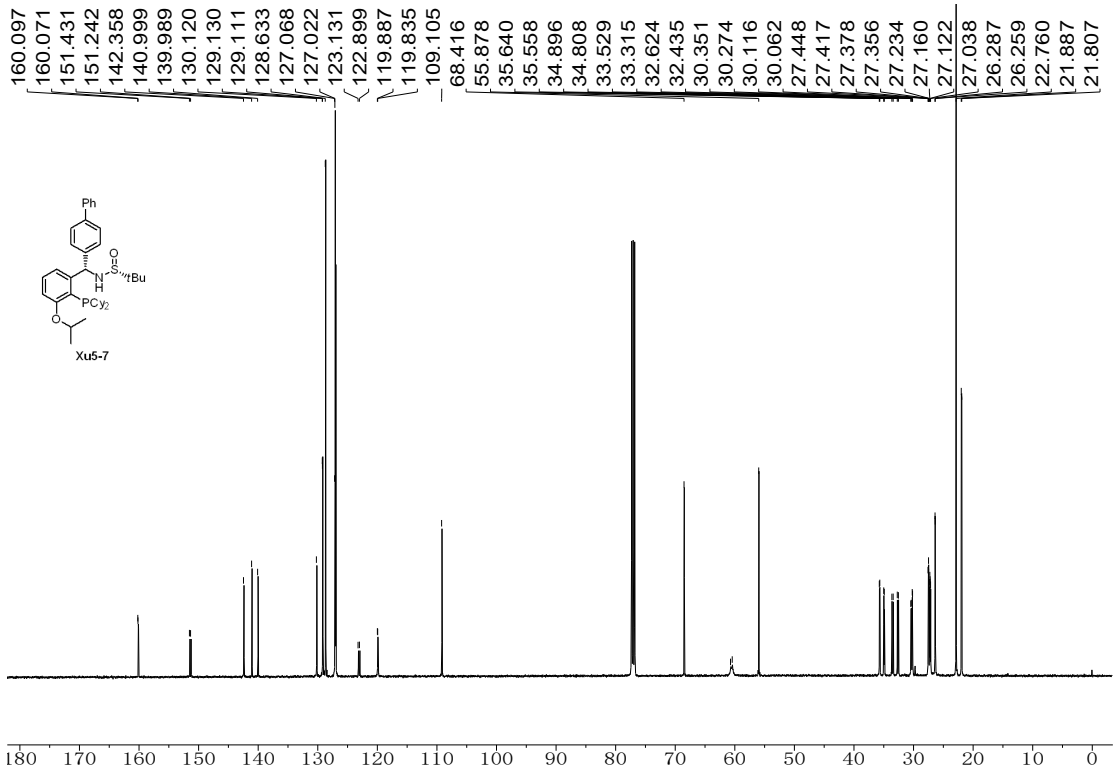

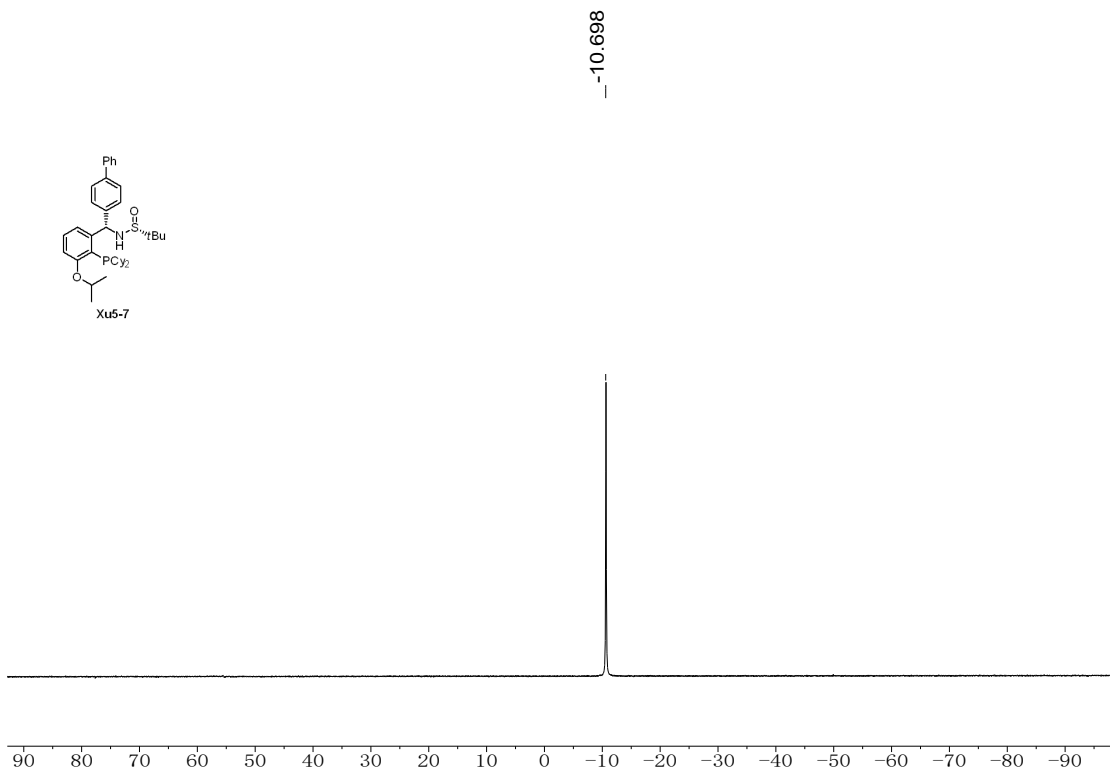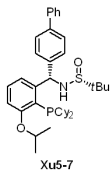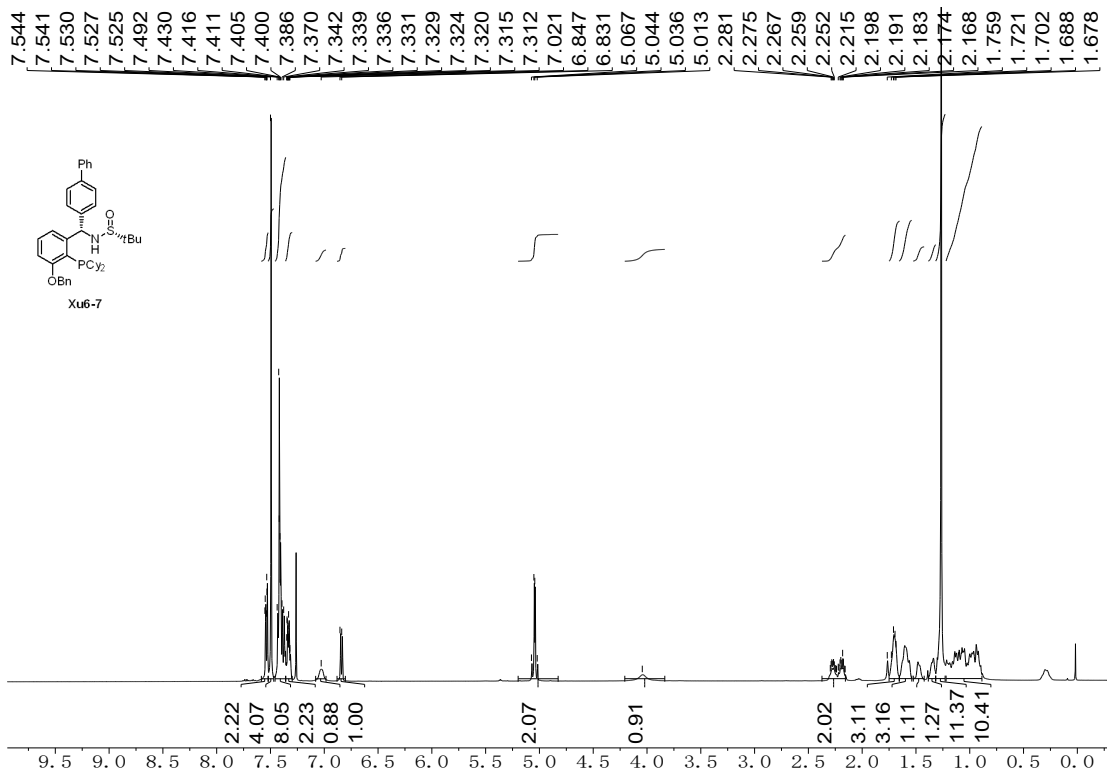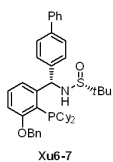

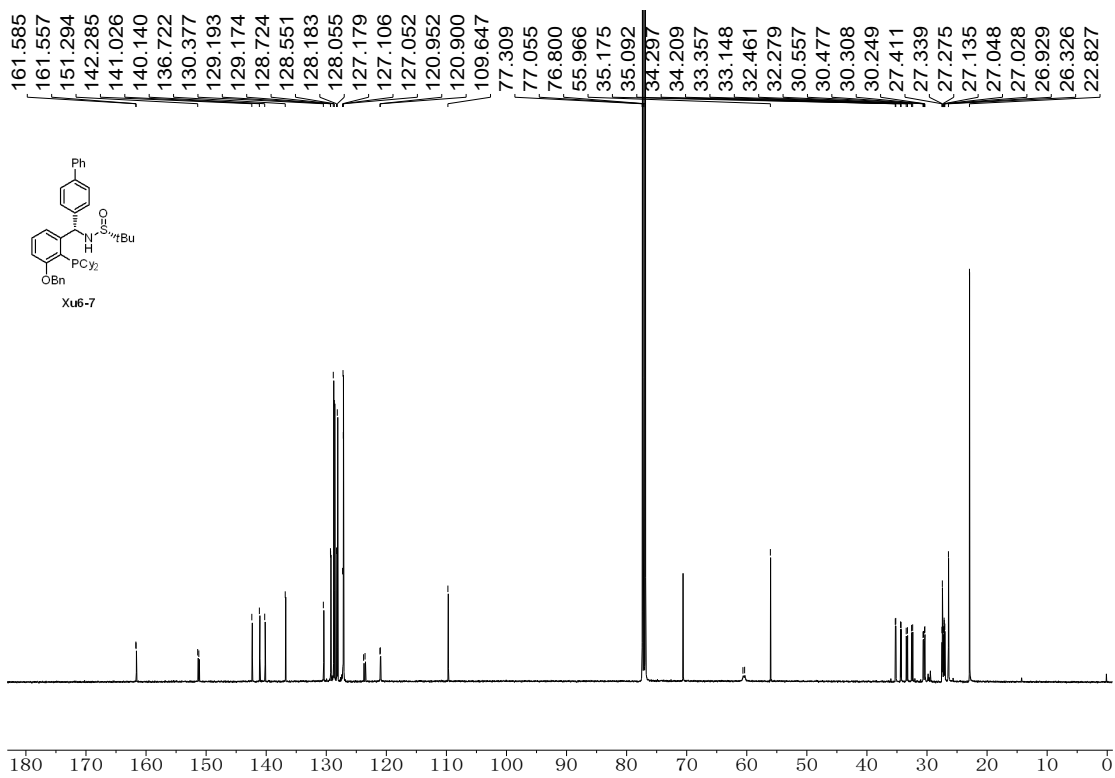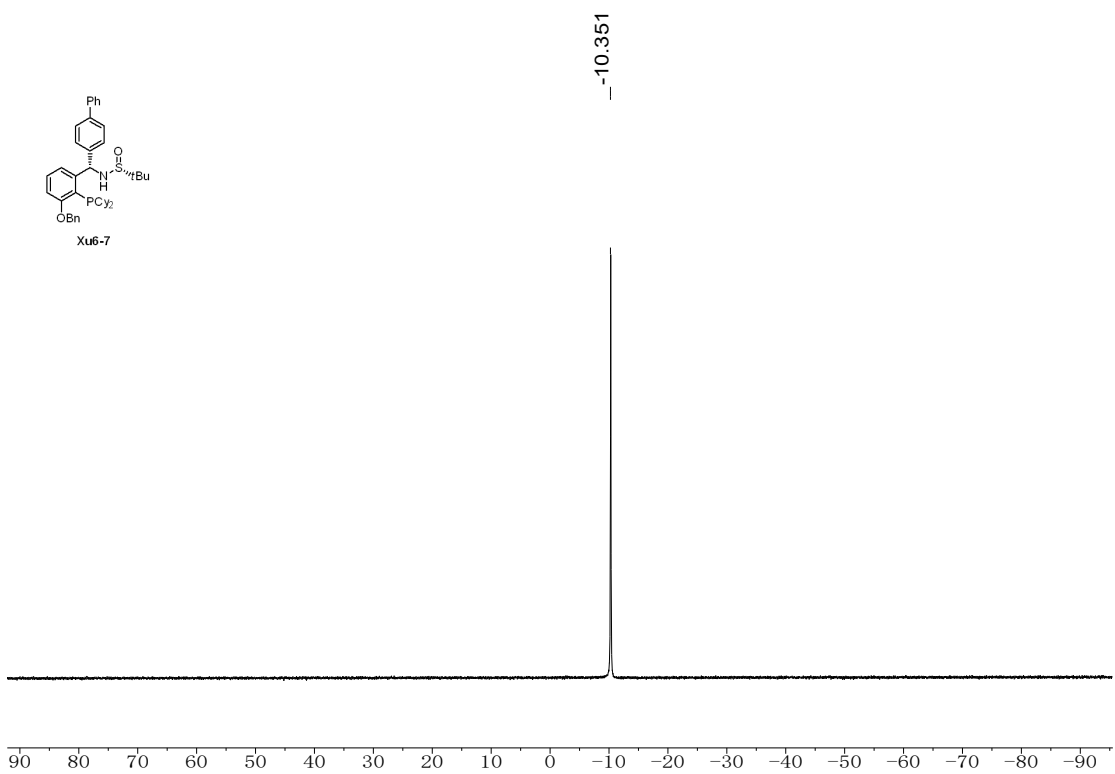

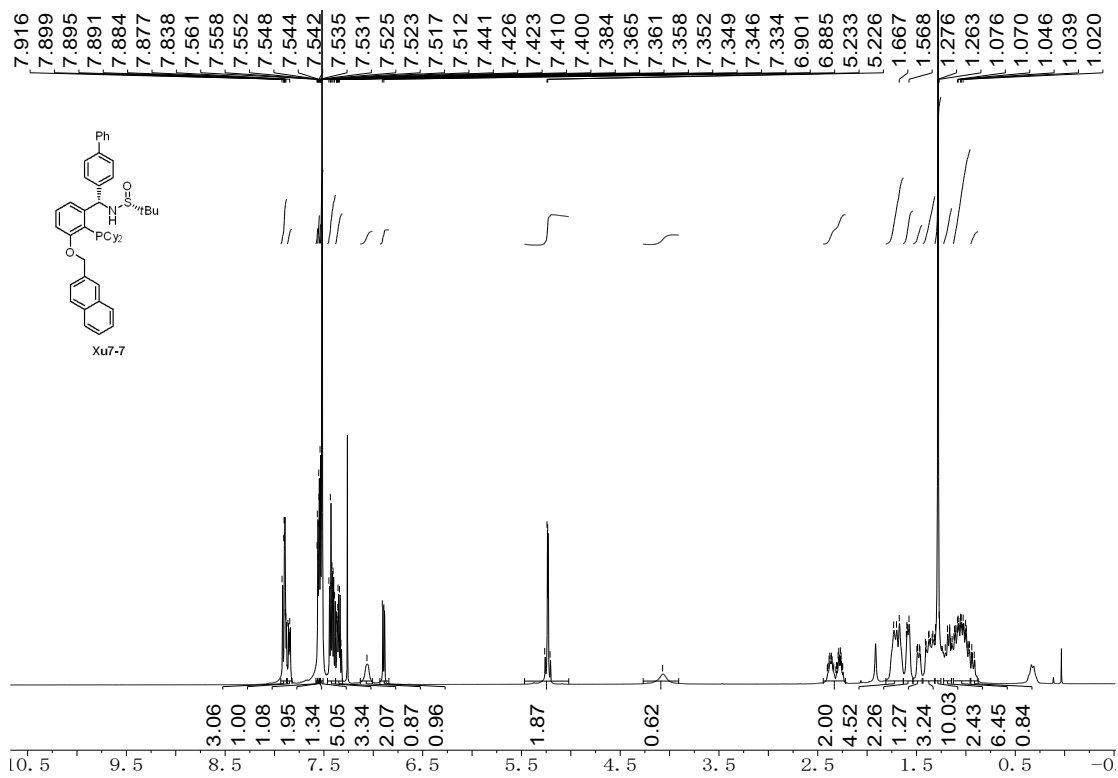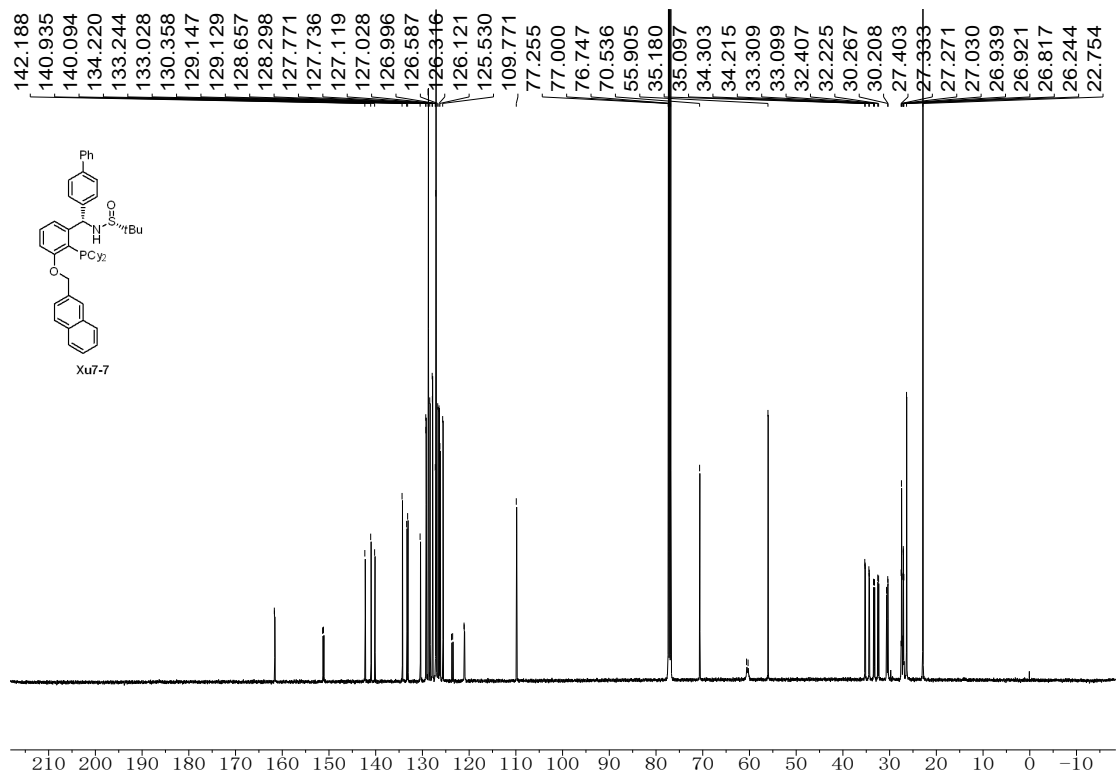

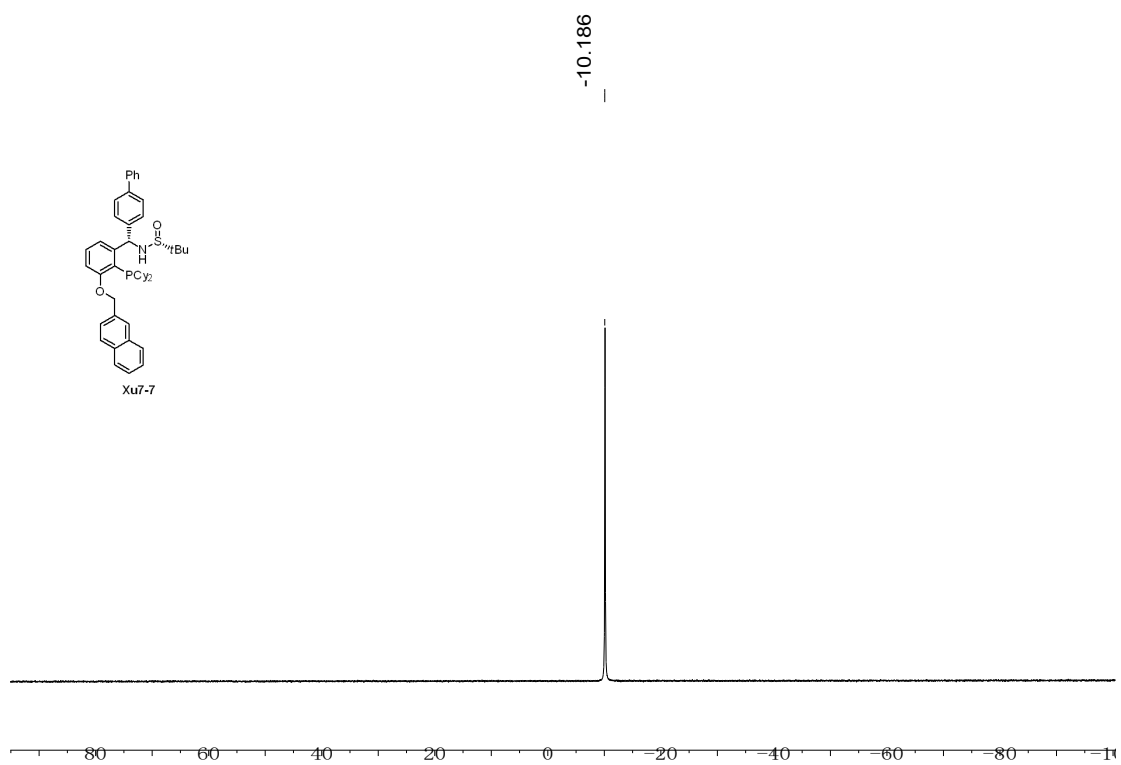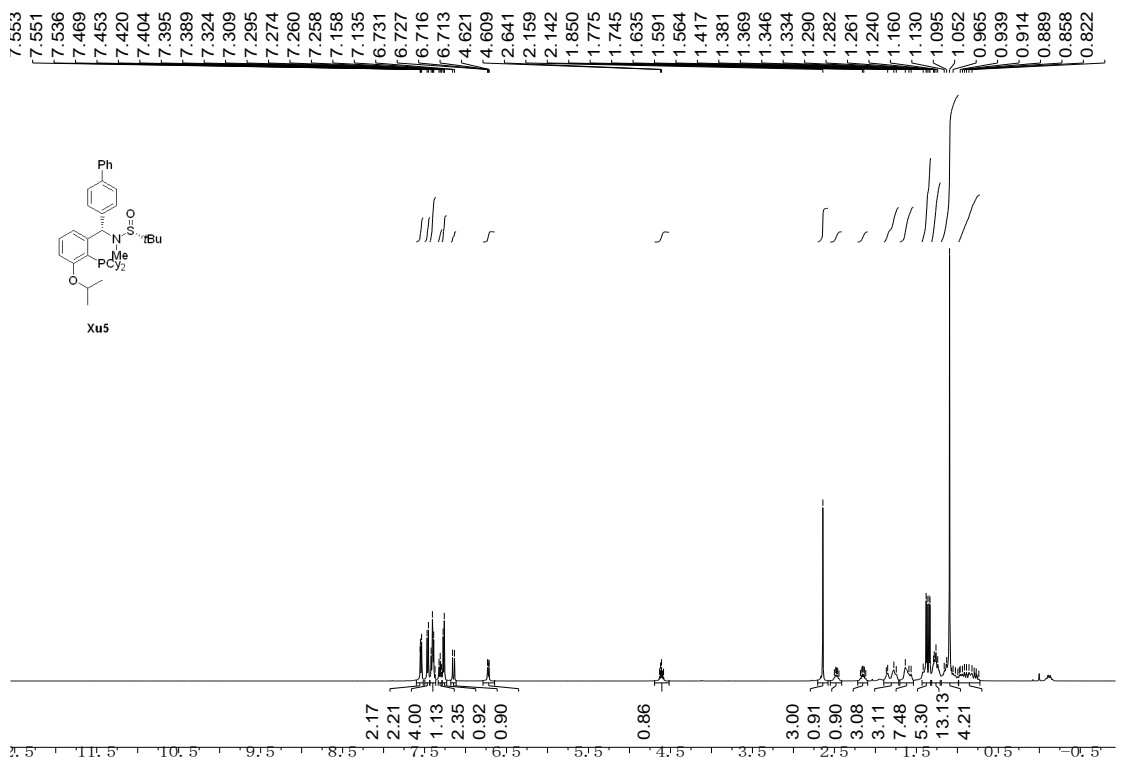

160.108  
160.079  
150.160  
149.979  
140.989  
139.811  
139.233  
131.717  
130.252  
128.626  
127.057  
126.979  
126.382  
122.959  
122.732  
119.573  
119.531  
109.152  
77.255  
77.001  
76.746  
70.723  
70.401  
68.336  
58.601  
35.475  
35.395  
34.538  
34.449  
33.623  
33.407  
32.424  
32.241  
30.781  
30.695  
30.394  
29.691  
29.638  
27.390  
27.357  
27.317  
27.296  
27.163  
27.097  
27.056  
26.974  
26.411  
26.156  
24.115  
21.870  
21.826

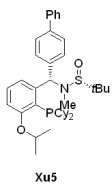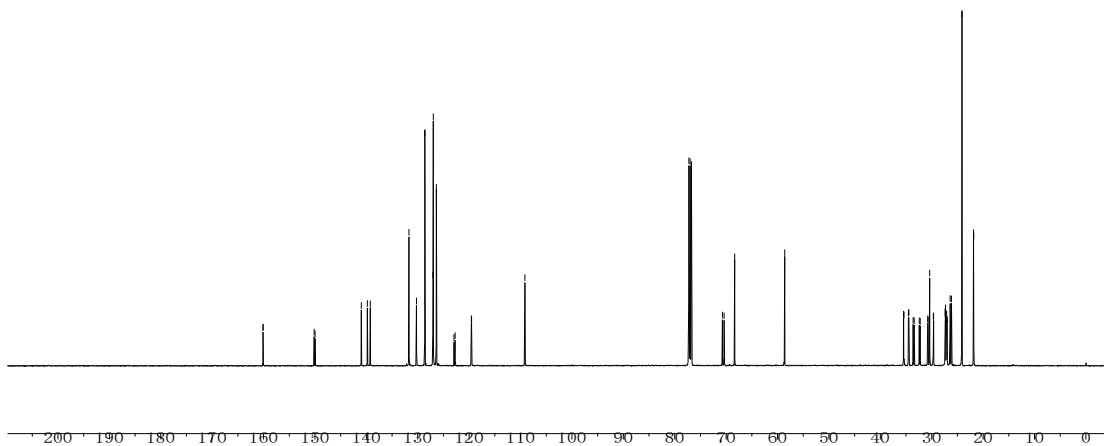

-10.402

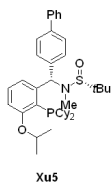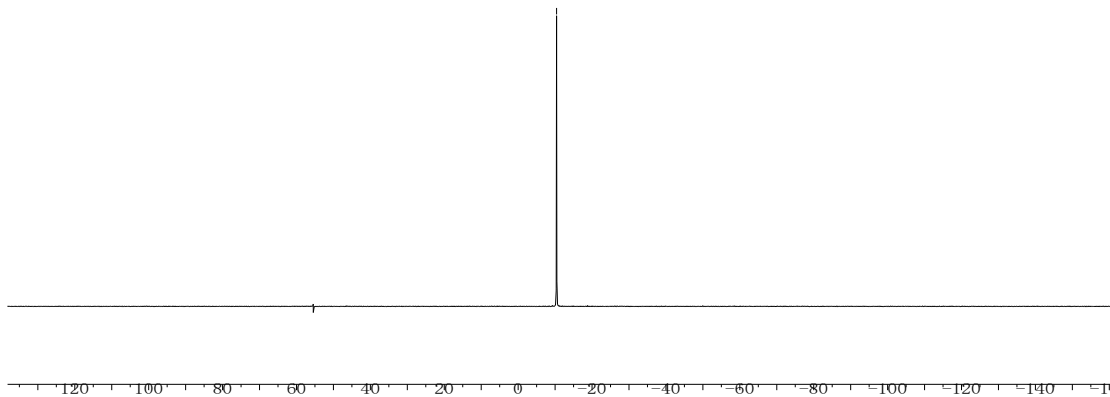

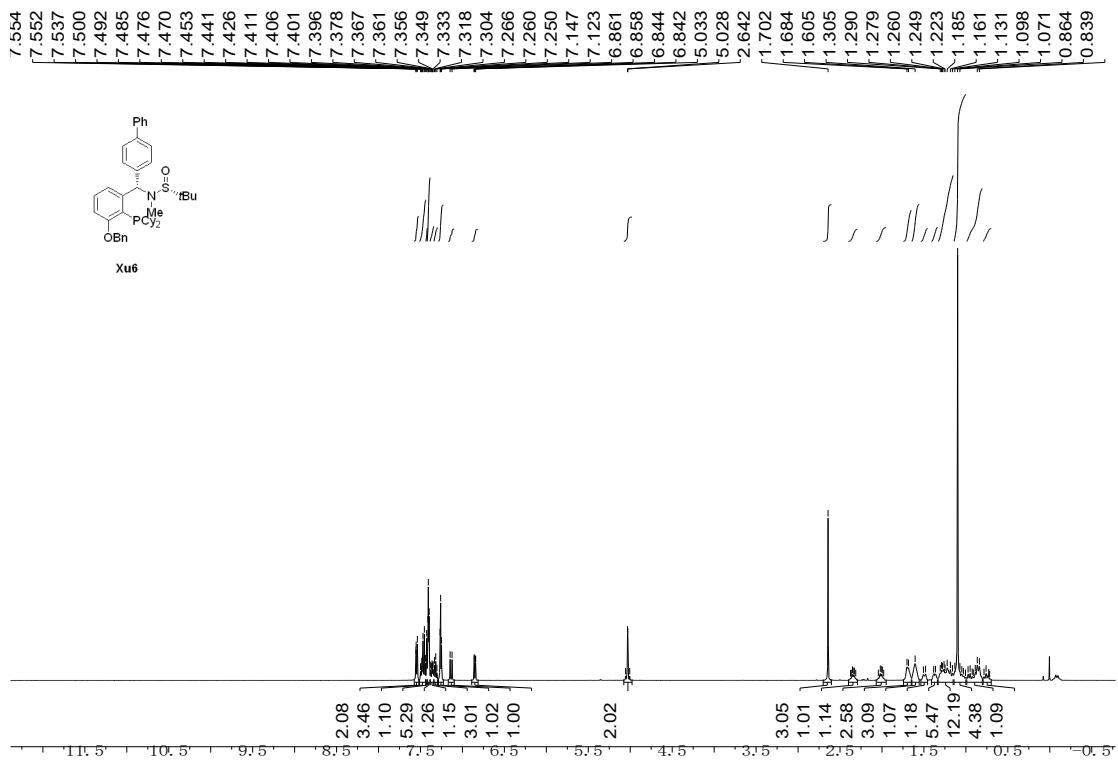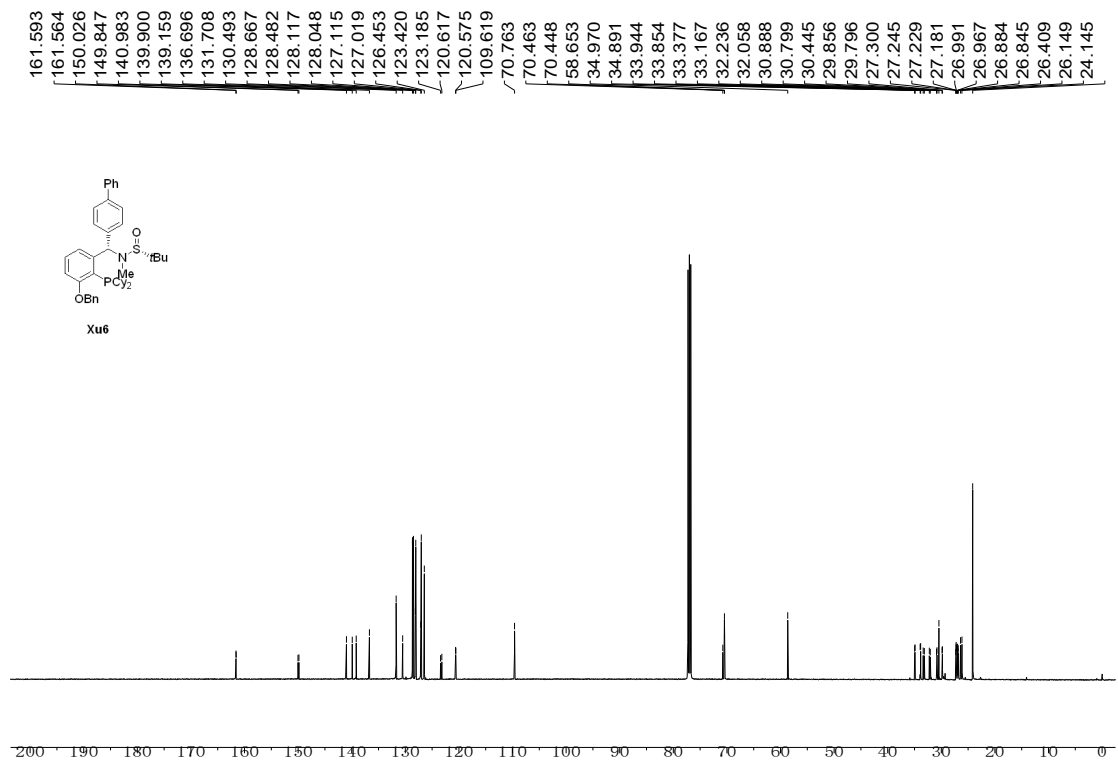

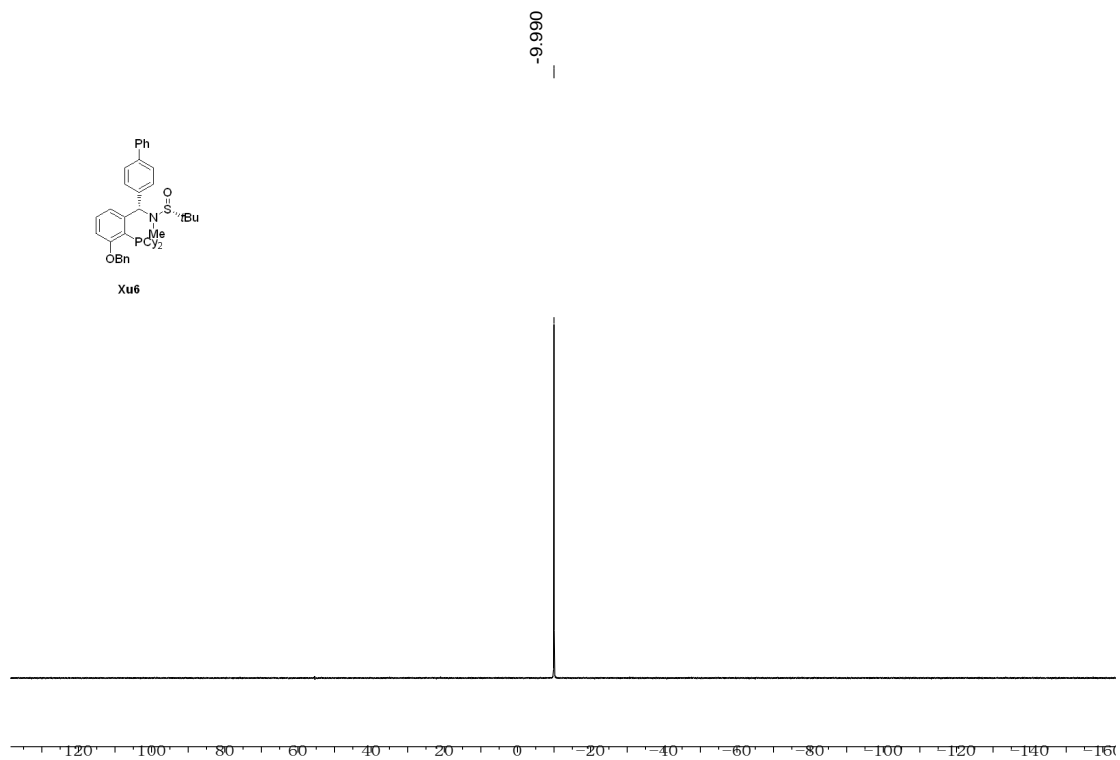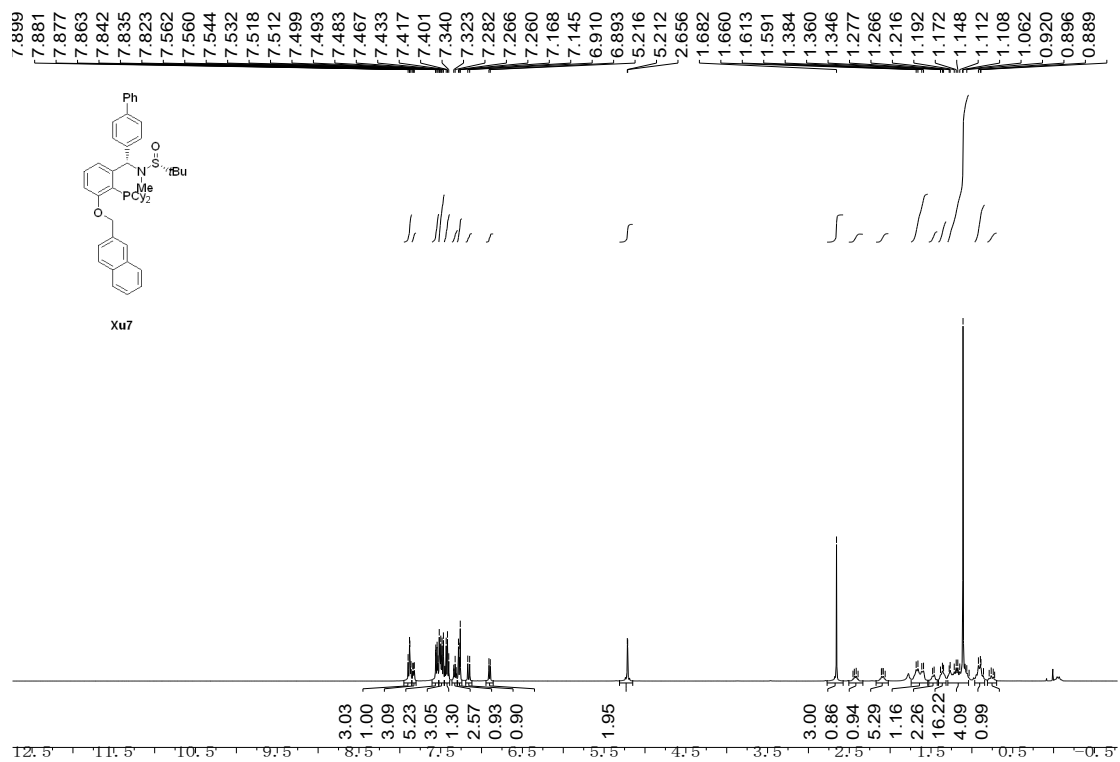



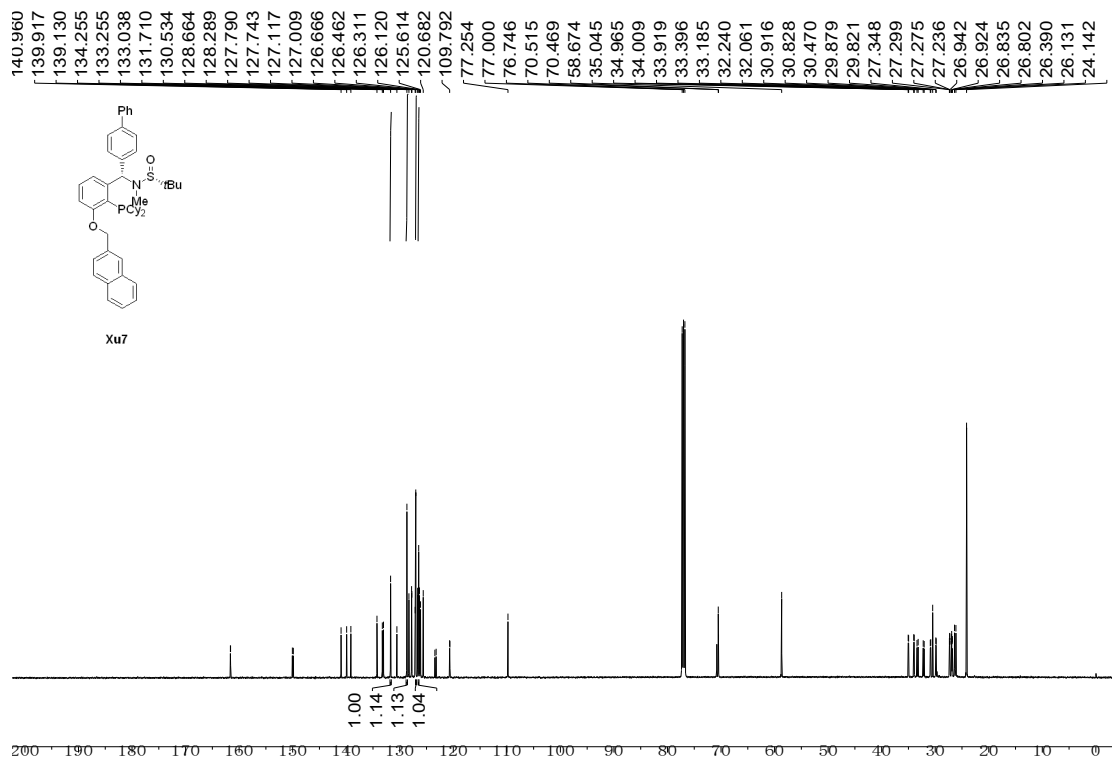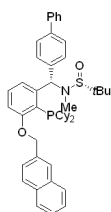

Xu7

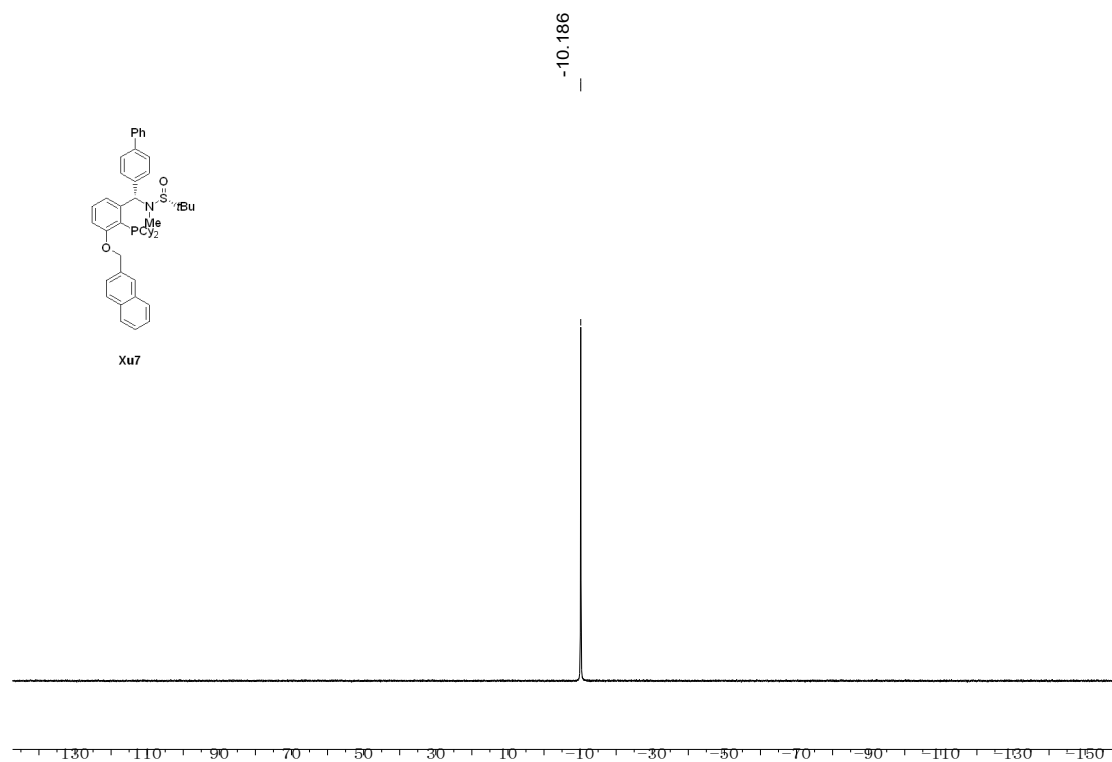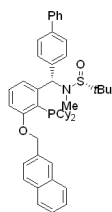

Xu7

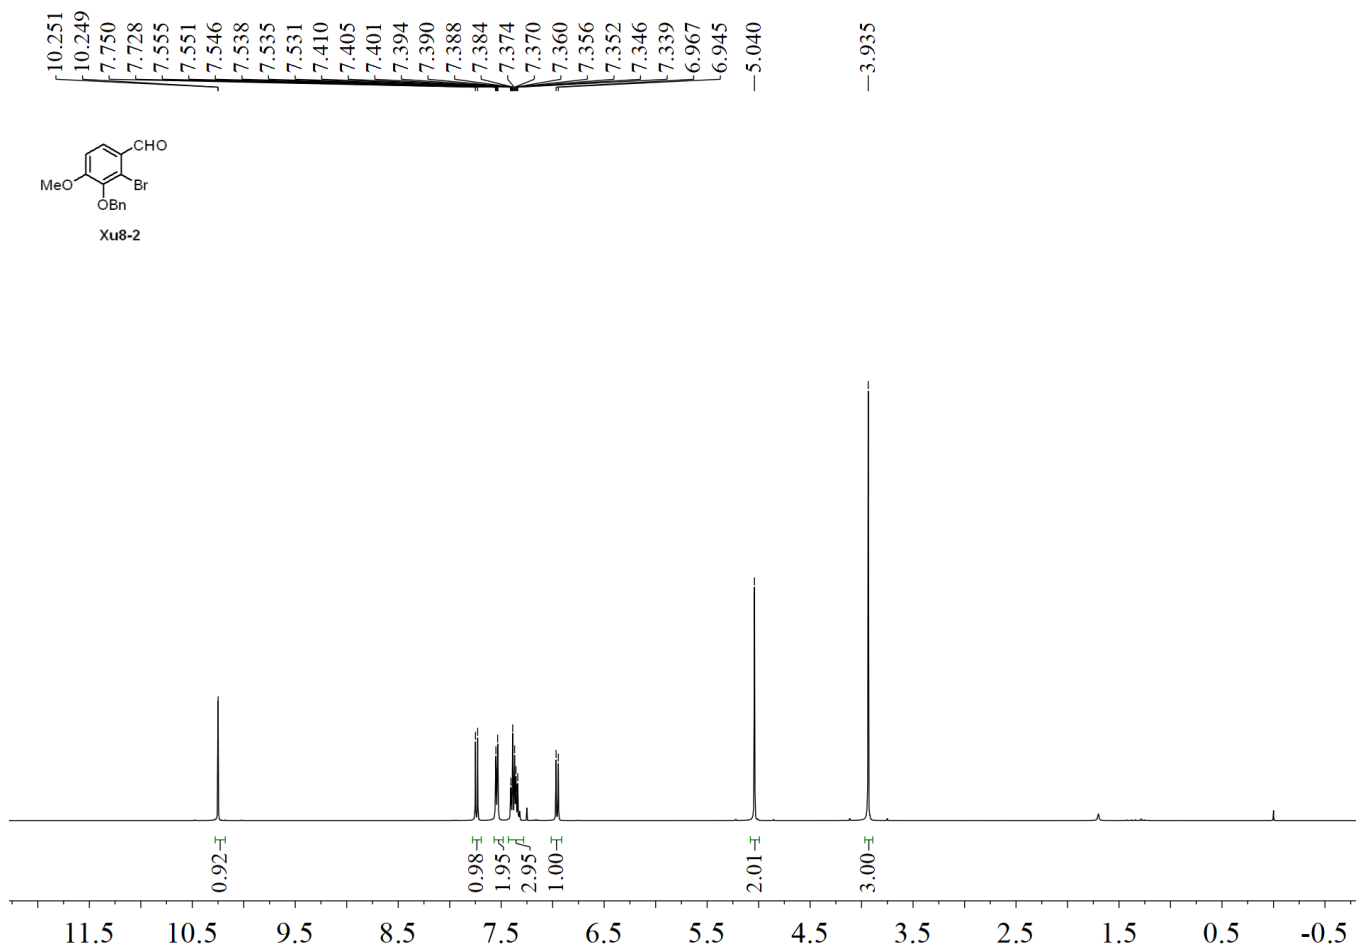

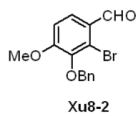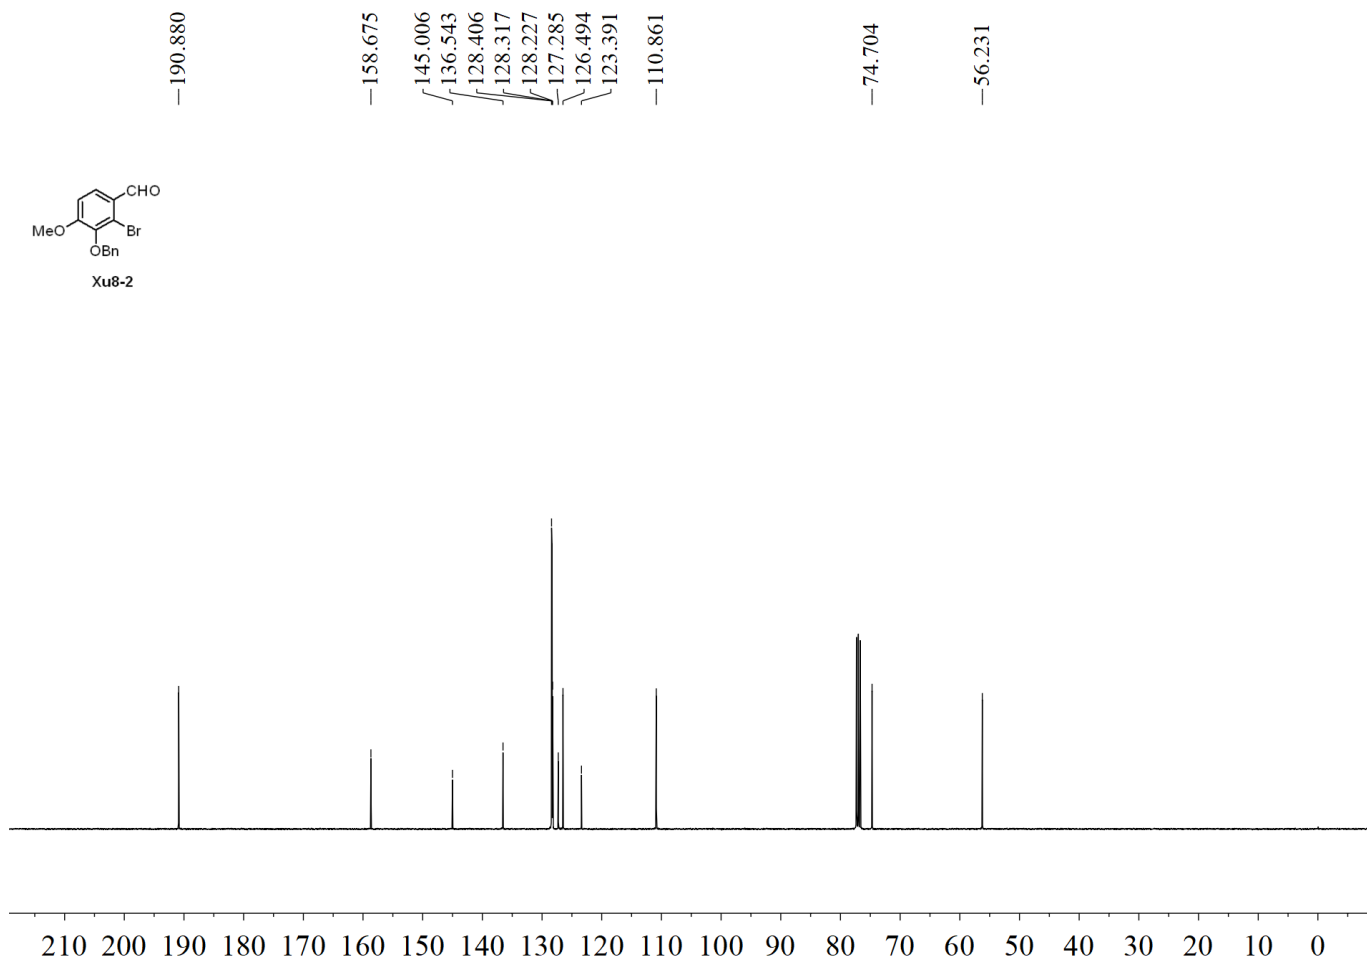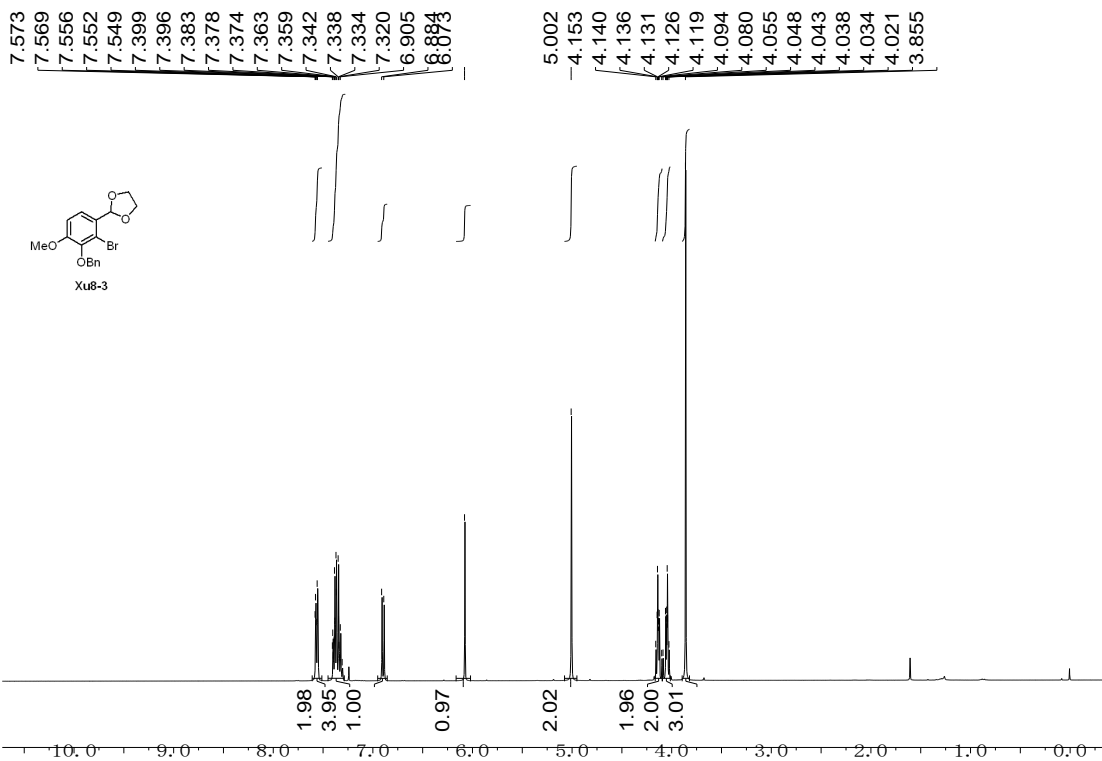

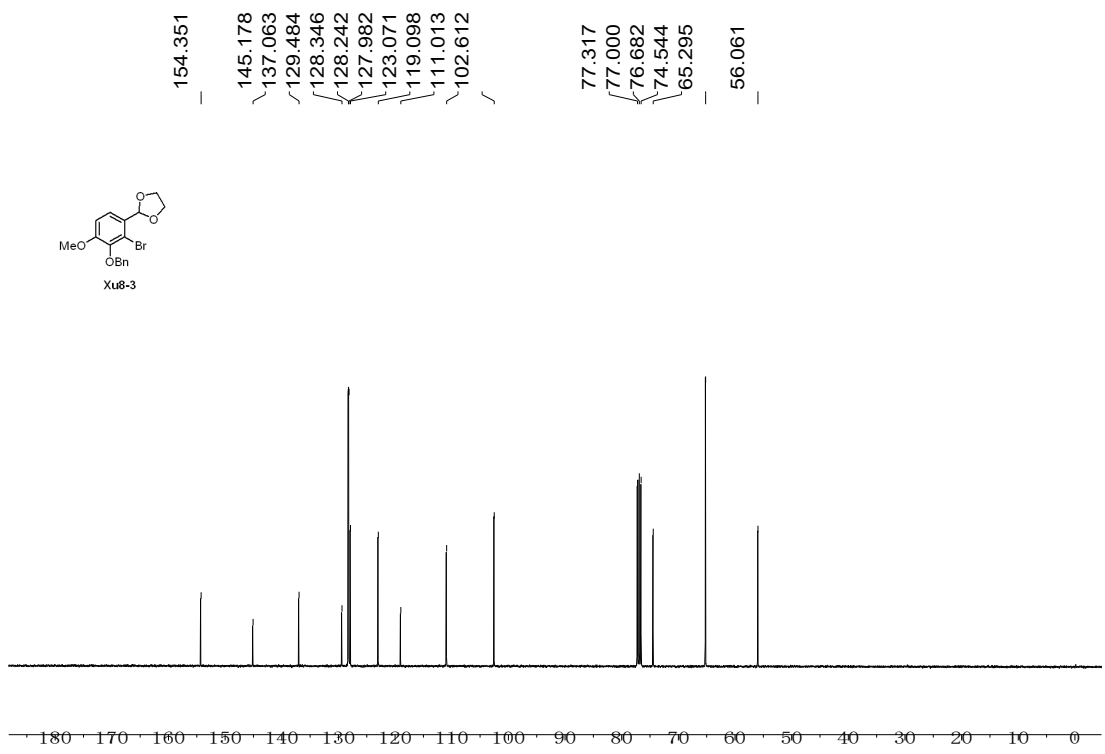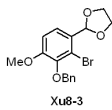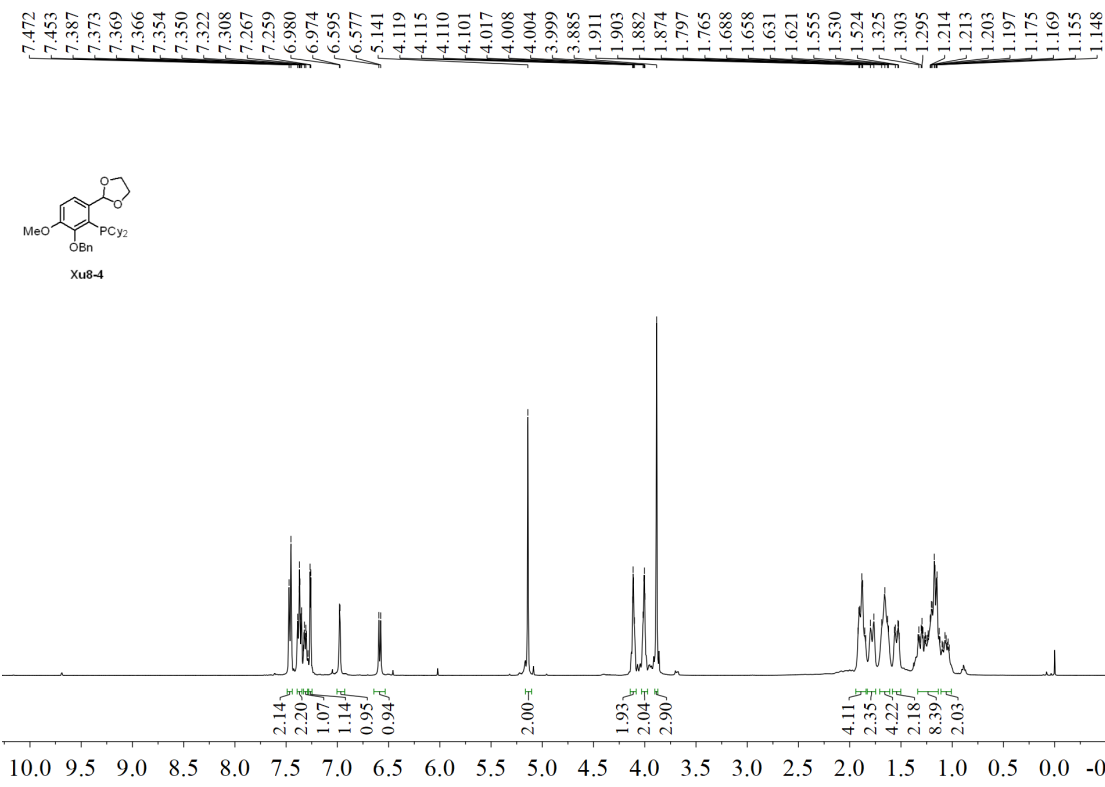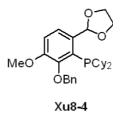

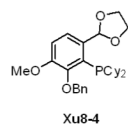

149.304  
 149.217  
 137.296  
 137.080  
 136.789  
 128.442  
 127.881  
 127.624  
 126.641  
 126.411  
 115.080  
 110.795  
 110.728  
 101.167  
 100.839  
 -70.649  
 -65.272  
 -56.224  
 34.288  
 34.167  
 30.620  
 30.444  
 29.171  
 29.092  
 27.177  
 27.087  
 27.052  
 27.009  
 26.291

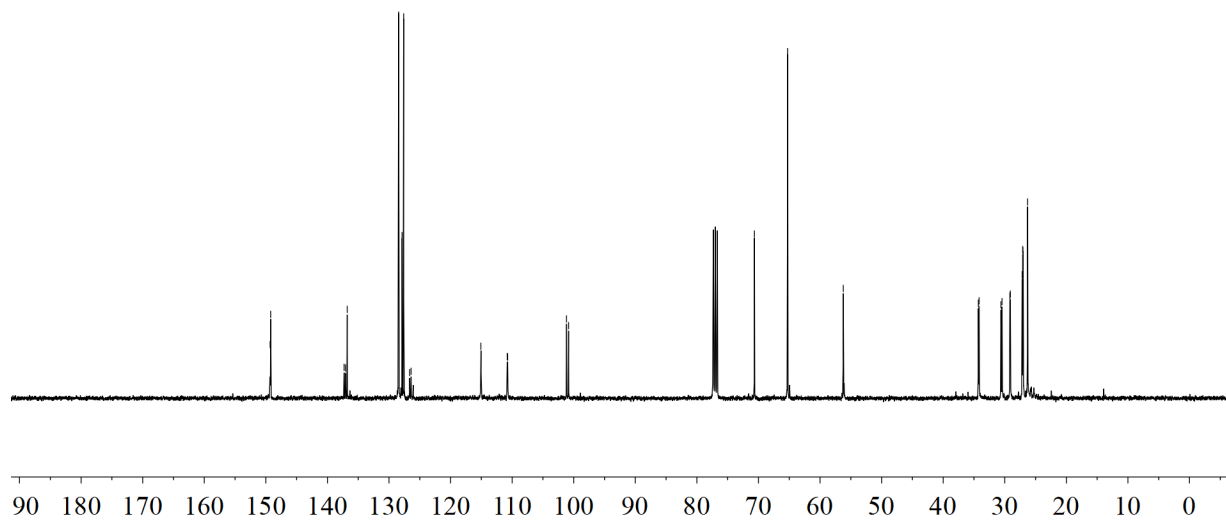

--17.479

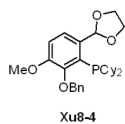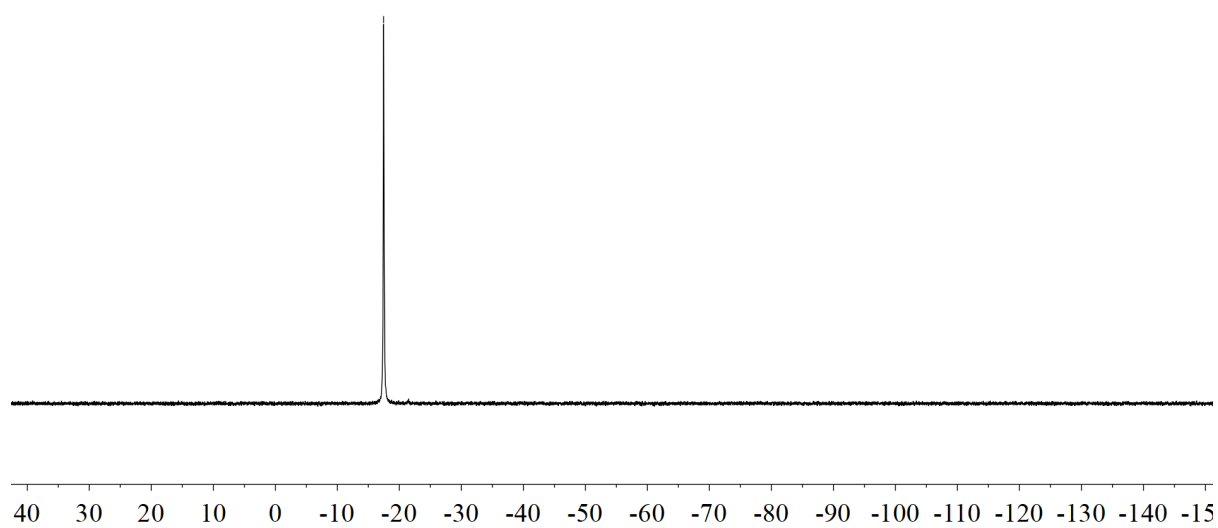

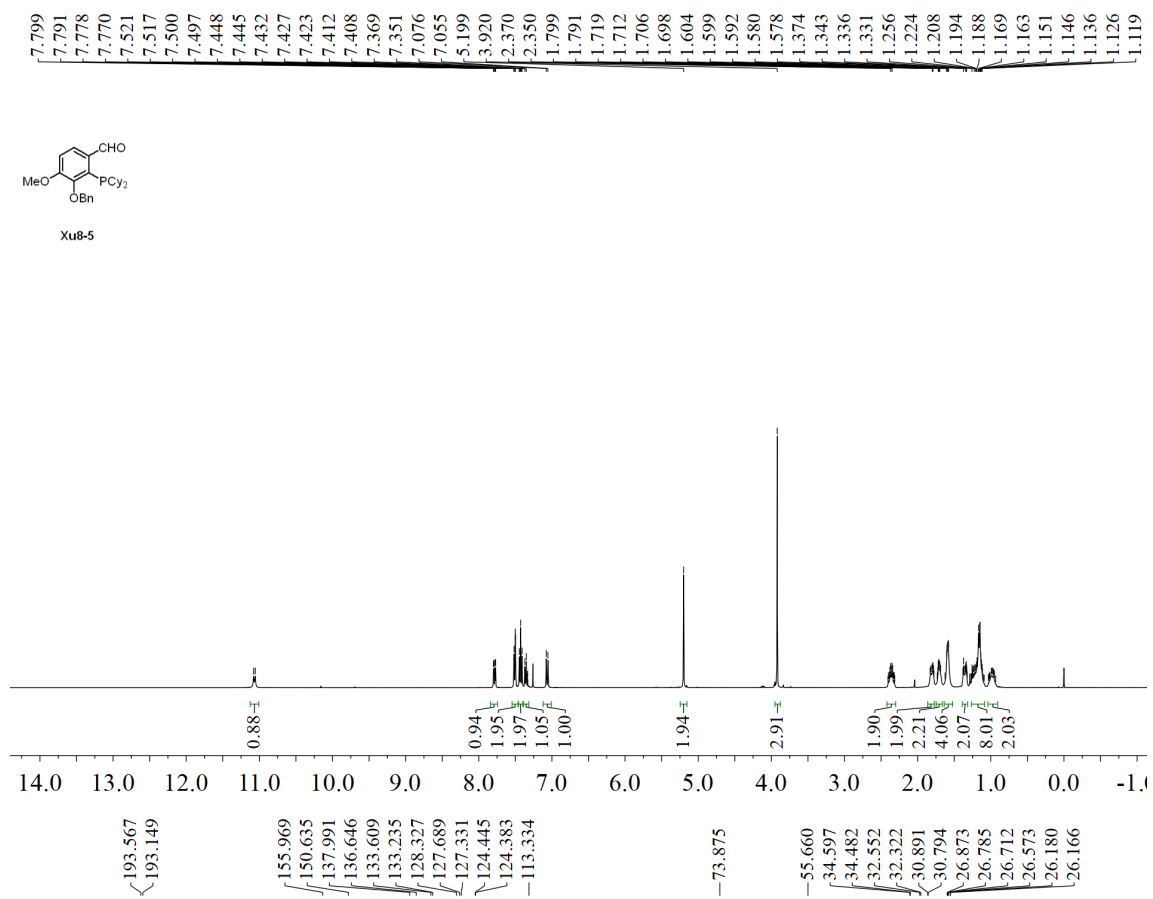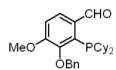

Xu8-5

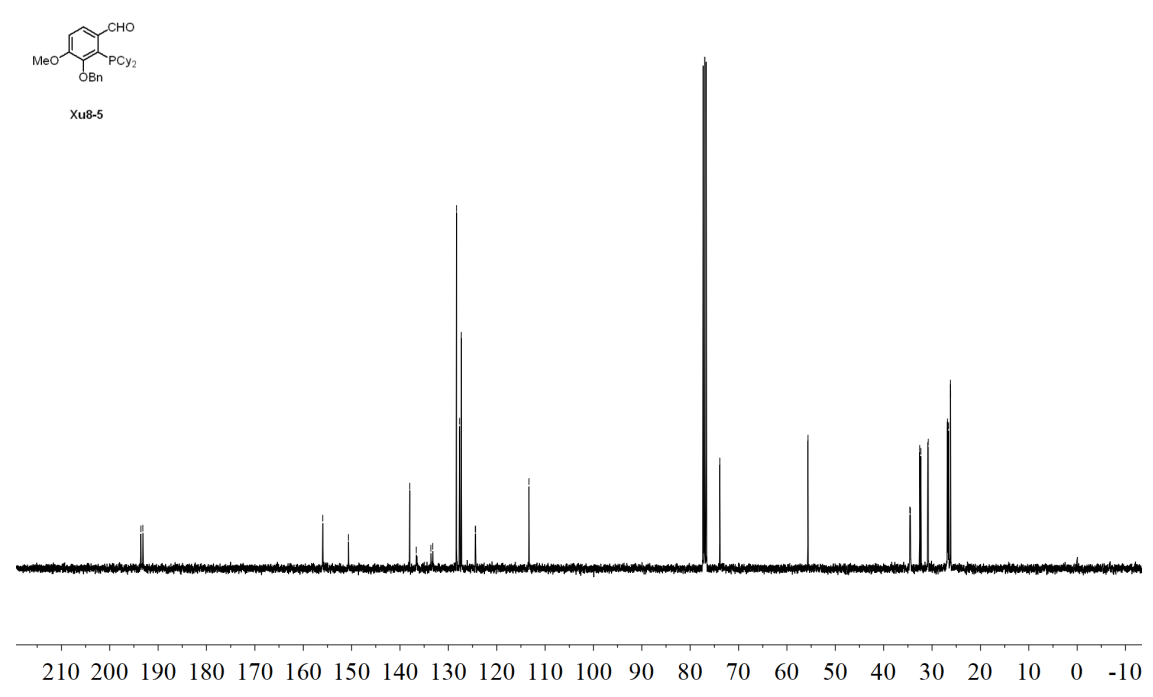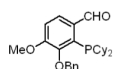

Xu8-5

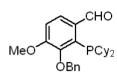

Xu8-5

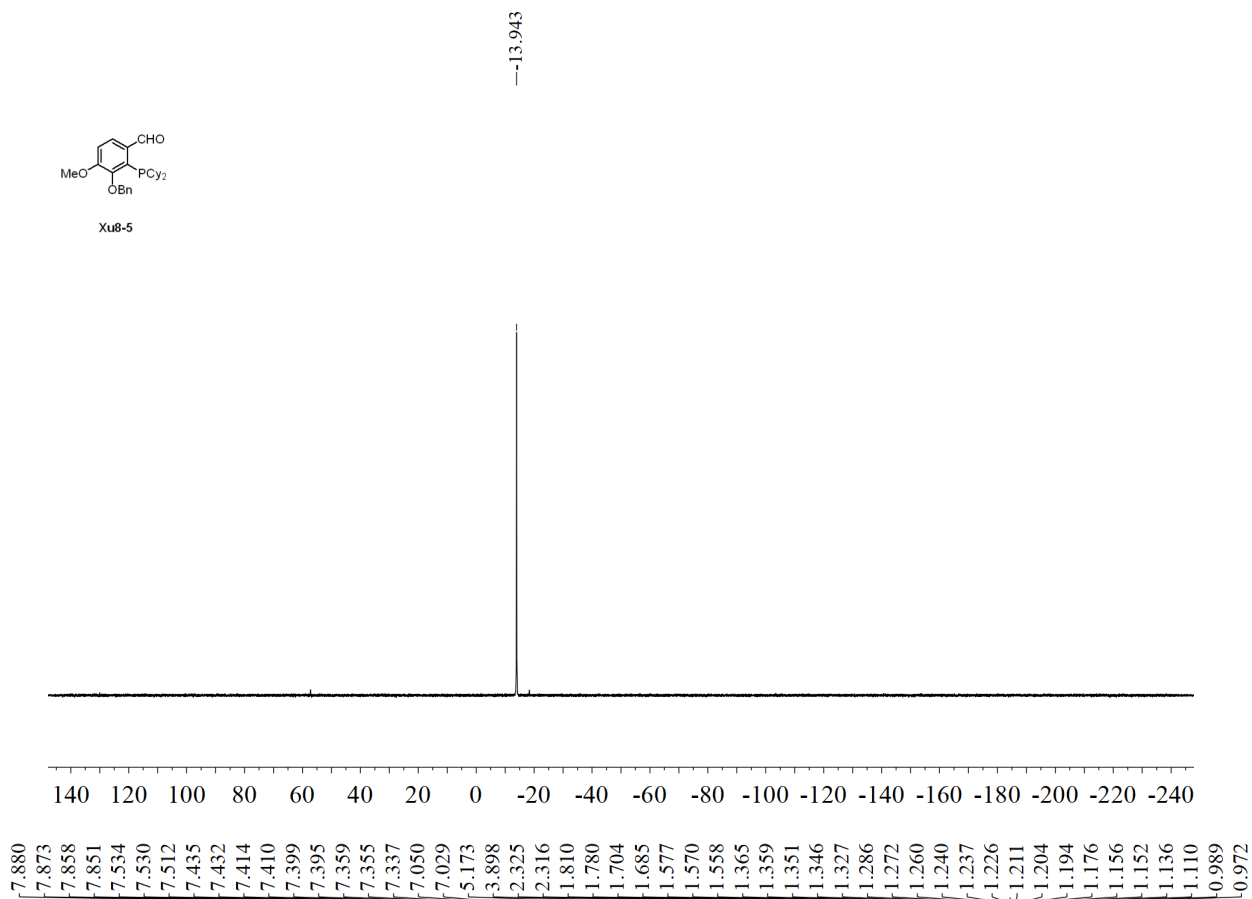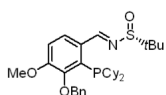

Xu8-6

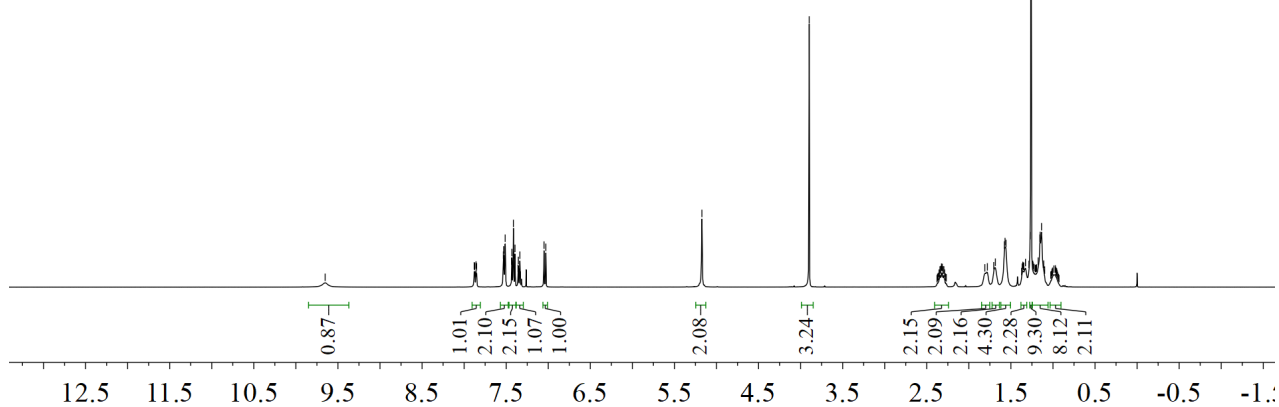

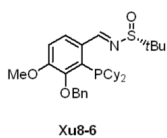

164.049  
163.706  
154.513  
151.034  
138.029  
128.252  
127.610  
127.440  
124.306  
124.269  
113.494

73.961  
57.530  
55.626  
34.779  
32.417  
32.177  
30.730  
30.658  
30.632  
30.562  
26.883  
26.795  
26.731  
26.687  
26.592  
26.549  
26.168  
22.620

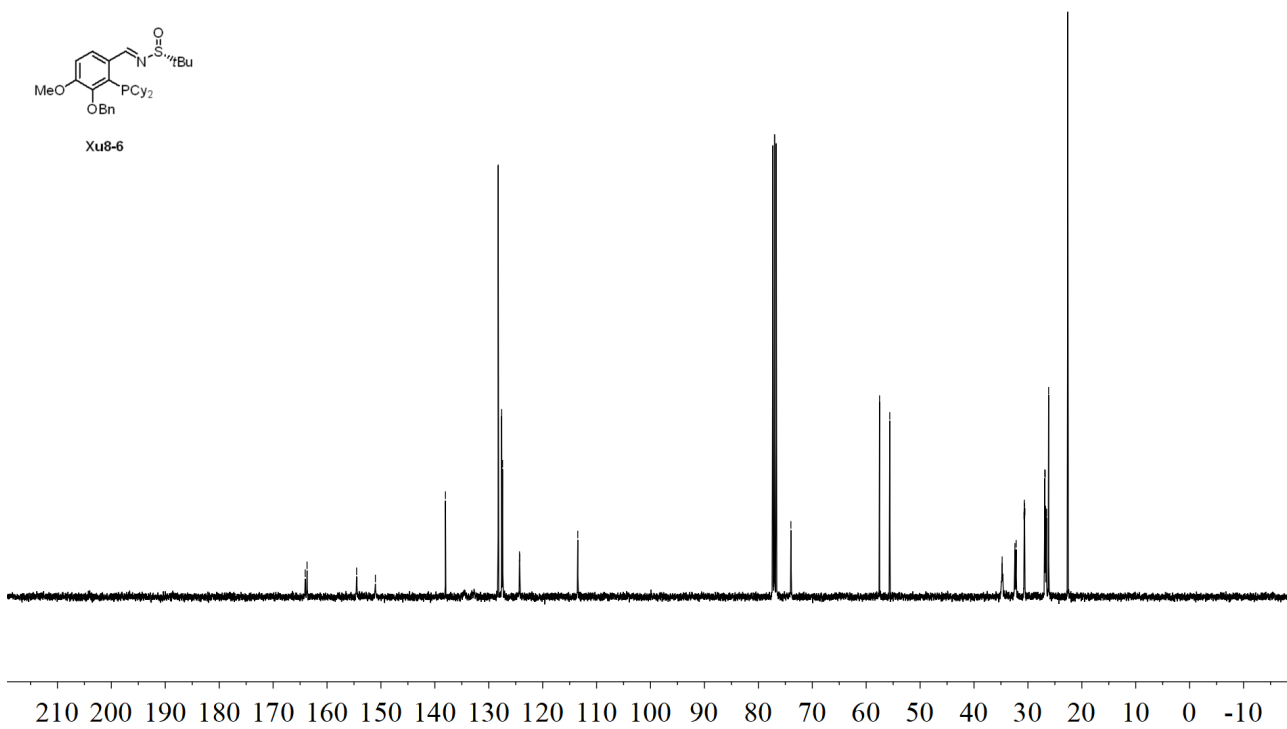

-9.324

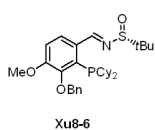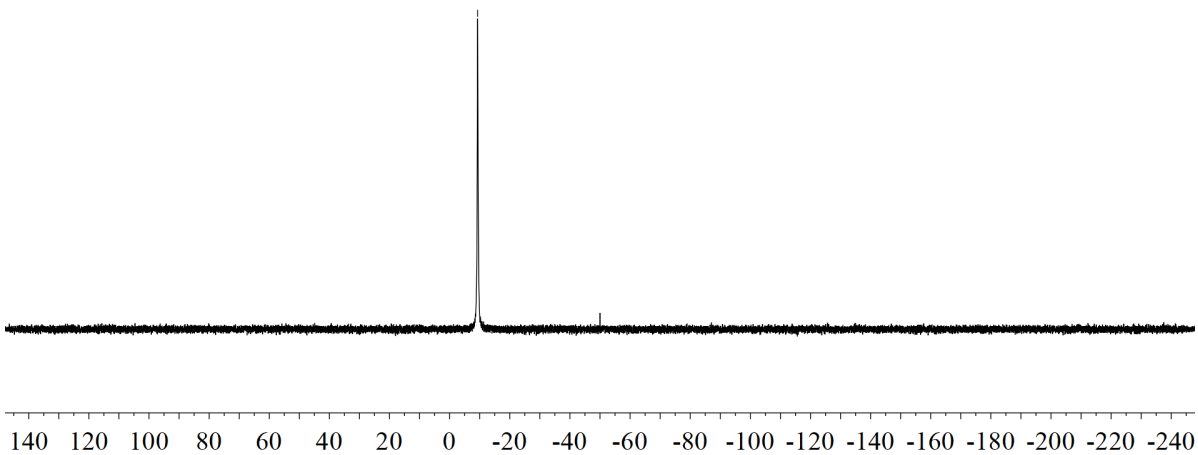



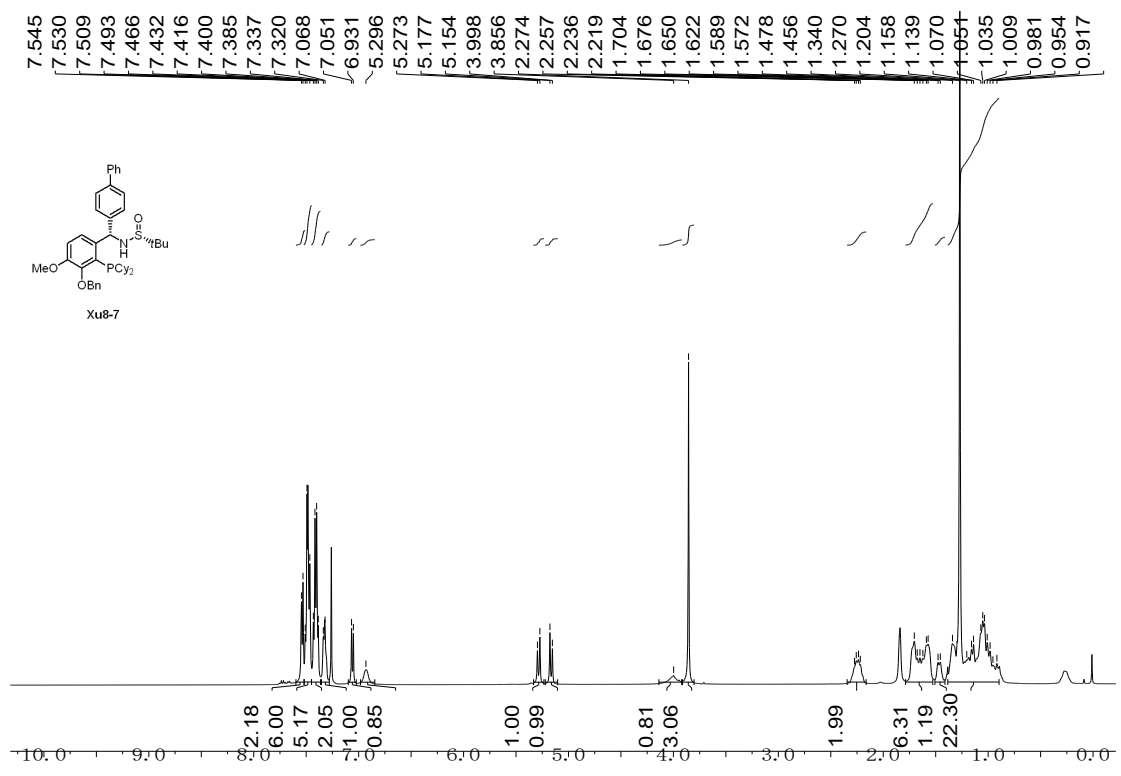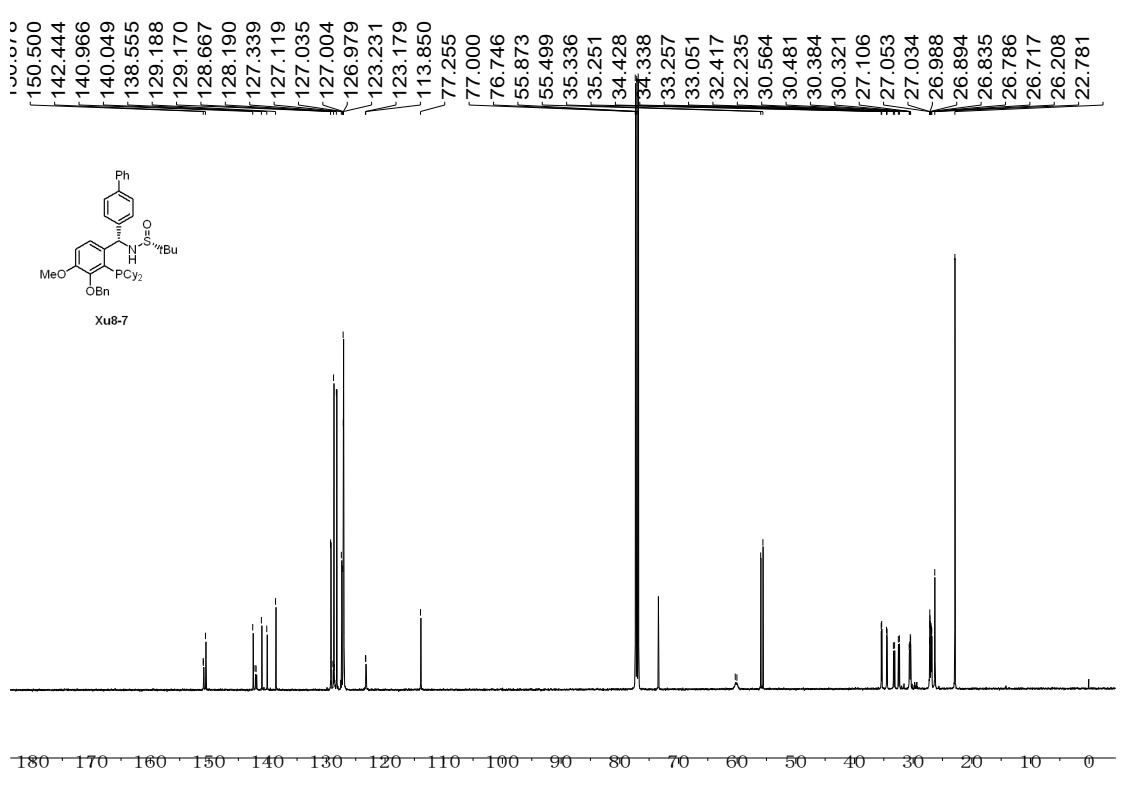

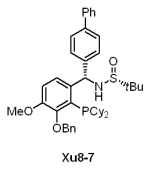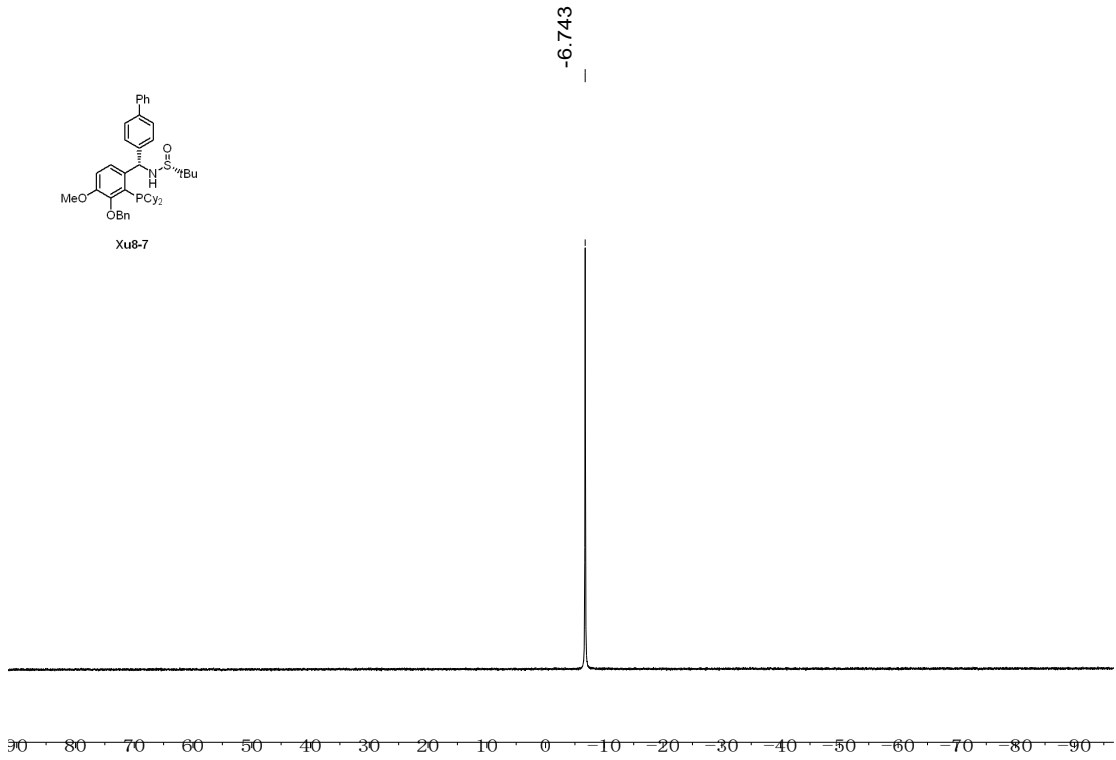

7.930  
 7.713  
 7.457  
 7.453  
 7.440  
 7.414  
 7.411  
 7.400  
 7.396  
 7.384  
 7.380  
 7.339  
 7.336  
 7.325  
 7.321  
 7.306  
 7.302  
 7.295  
 7.284  
 7.278  
 7.066  
 7.062  
 7.049  
 7.045  
 5.296  
 5.292  
 5.272  
 5.269  
 5.164  
 5.141  
 3.868  
 3.865  
 1.696  
 1.632  
 1.629  
 1.549  
 1.527  
 1.338  
 1.335  
 1.275  
 1.272  
 1.094  
 1.070  
 1.039  
 1.025  
 1.022  
 1.006  
 1.002  
 0.978  
 0.974

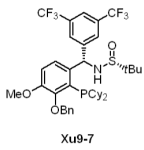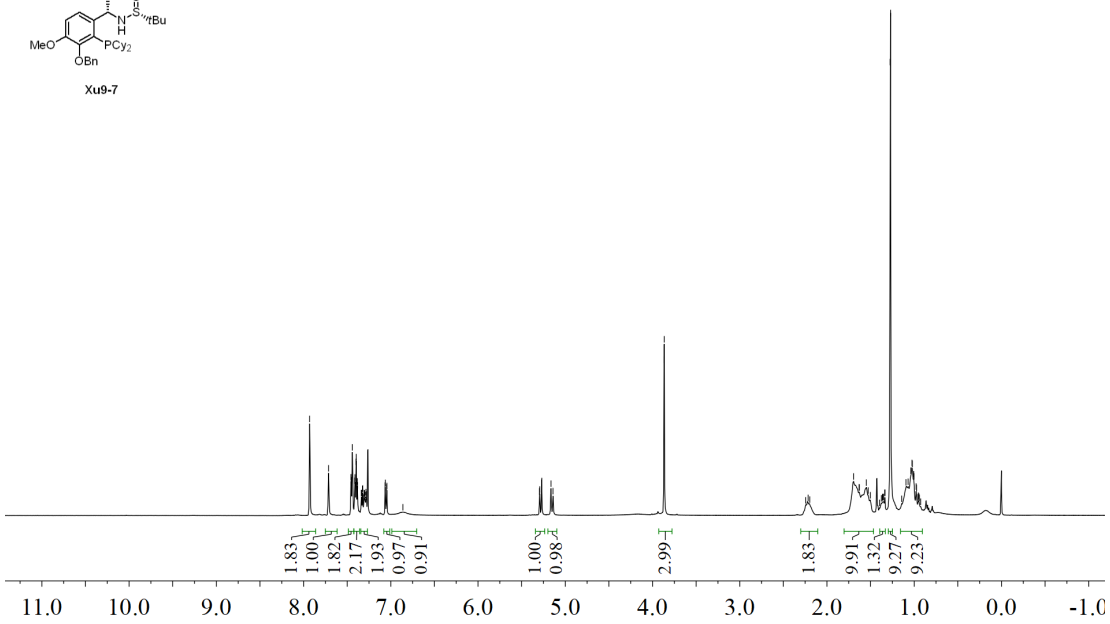

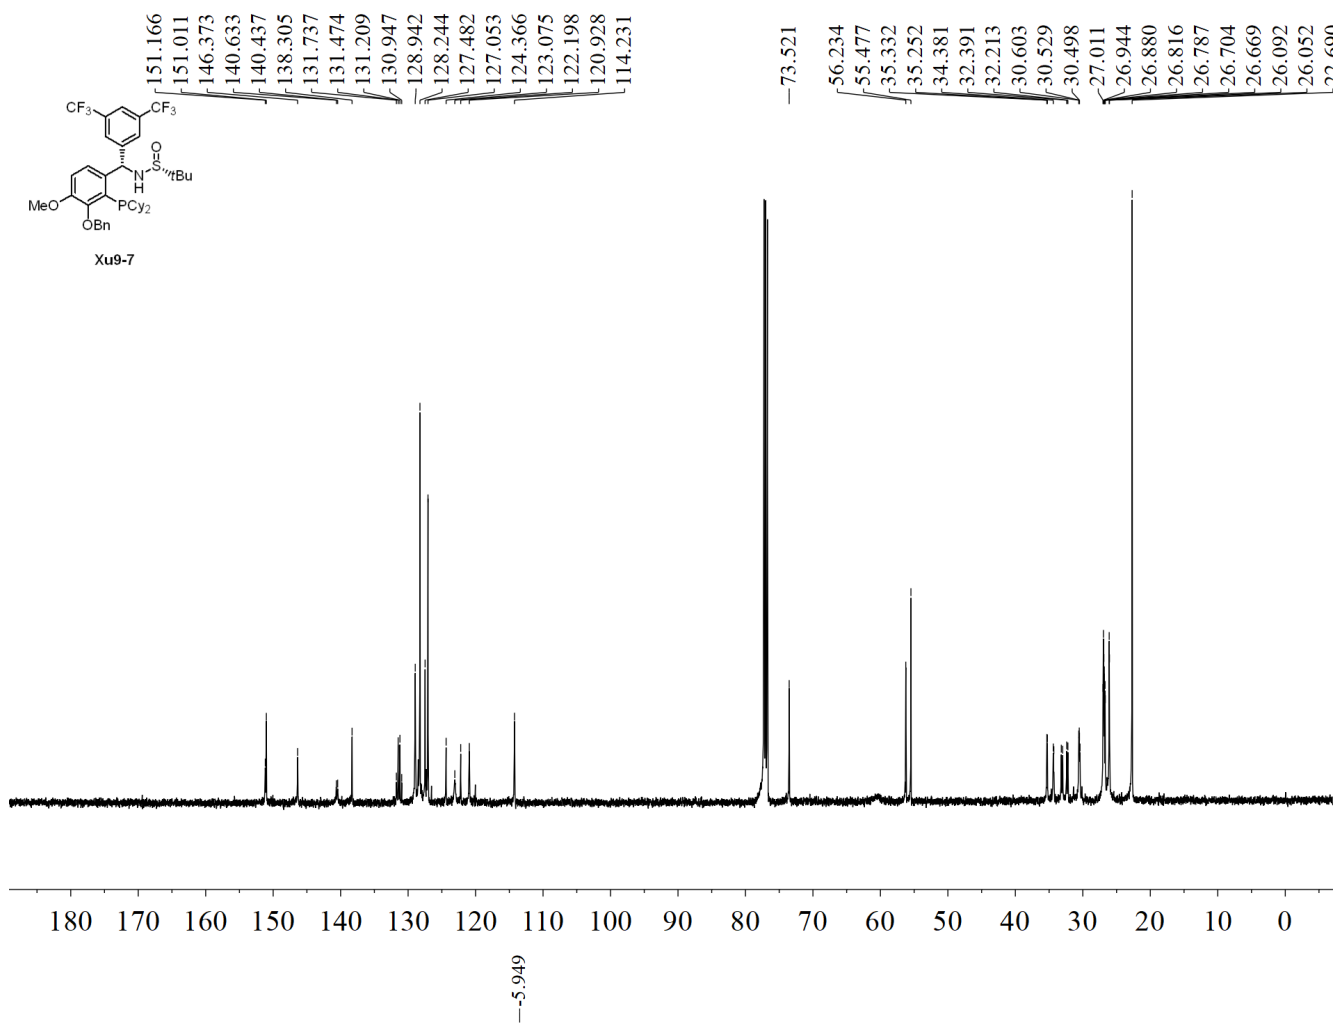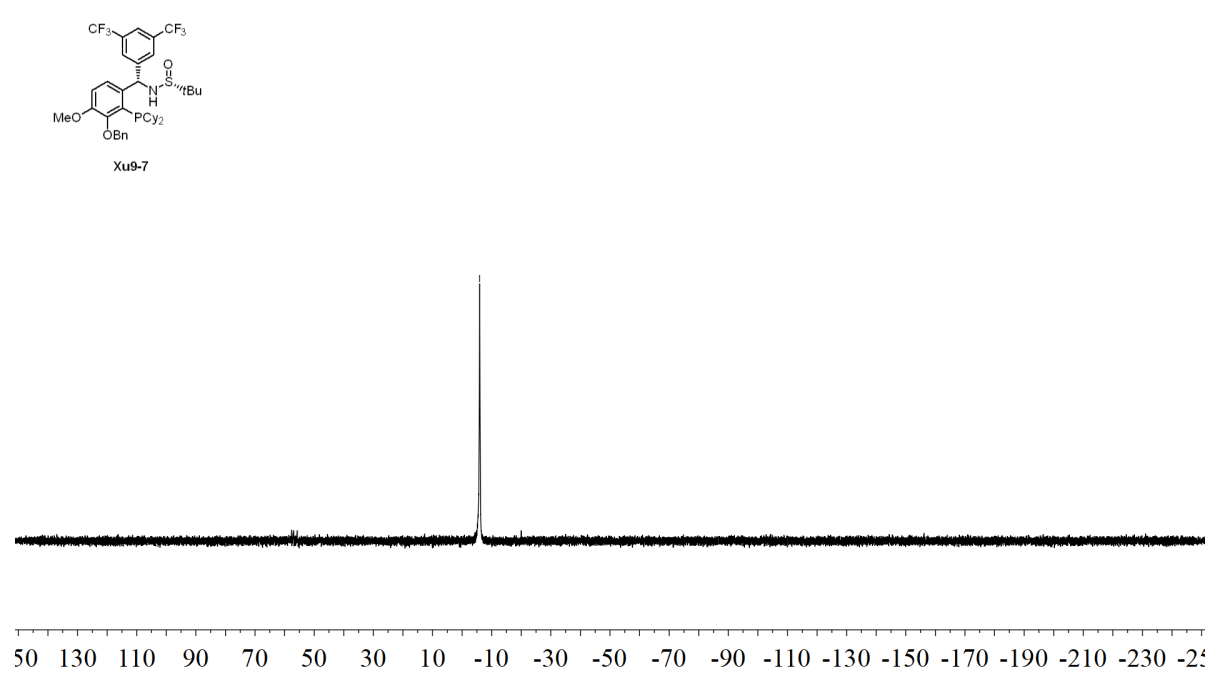

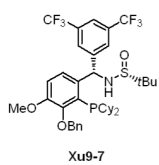

--62.717

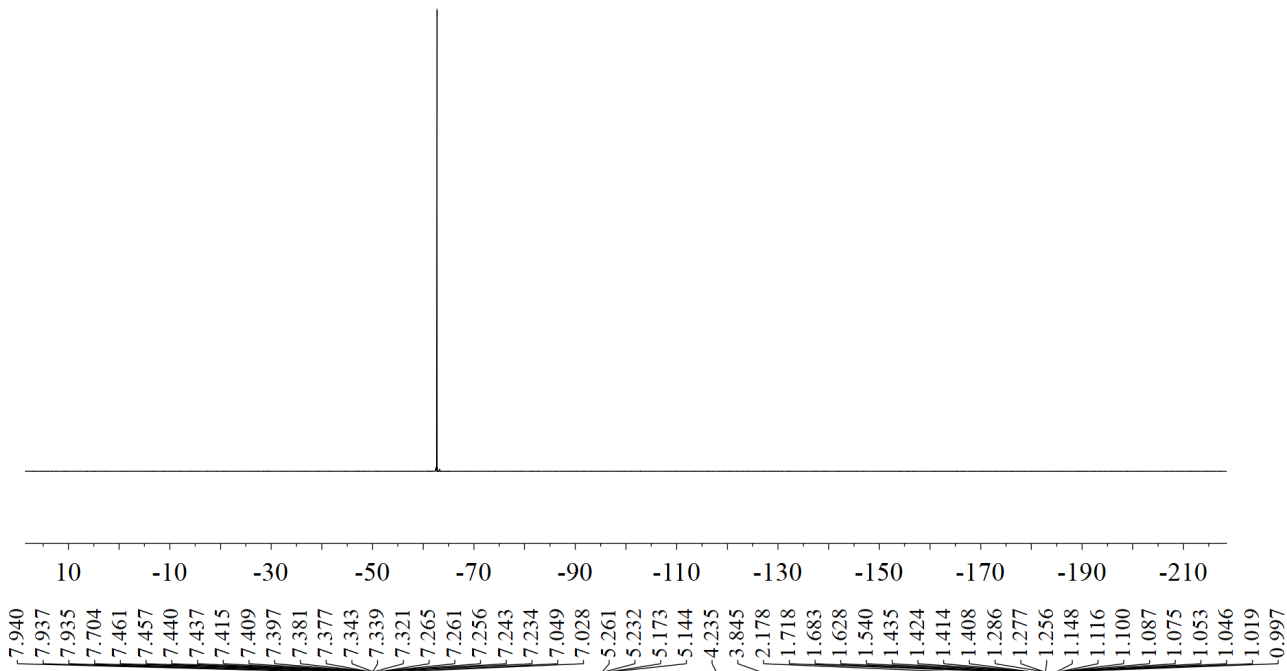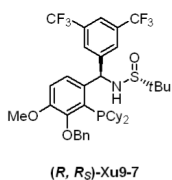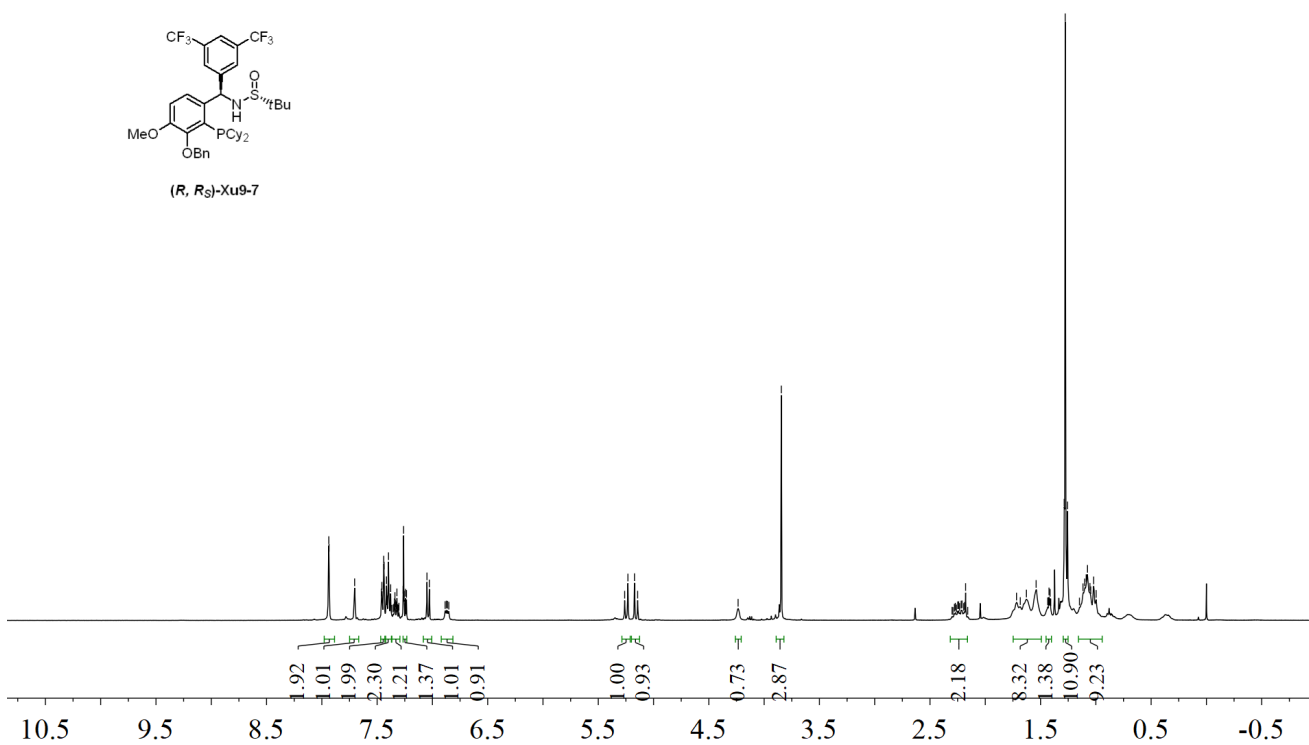

151.320  
151.292  
151.229  
146.093  
141.565  
141.372  
138.313  
131.625  
131.362  
131.099  
130.835  
128.865  
128.299  
127.542  
127.118  
124.474  
122.663  
122.606  
122.307  
120.748  
114.649  
73.626  
59.855  
59.605  
56.304  
55.575  
35.348  
35.268  
34.703  
34.624  
33.192  
32.990  
32.490  
32.311  
30.743  
30.666  
30.633  
30.576  
27.072  
27.005  
26.912  
26.876  
26.793  
26.765  
26.624  
26.133  
22.763

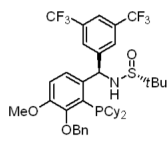

(R, R<sub>s</sub>)-Xu9-7

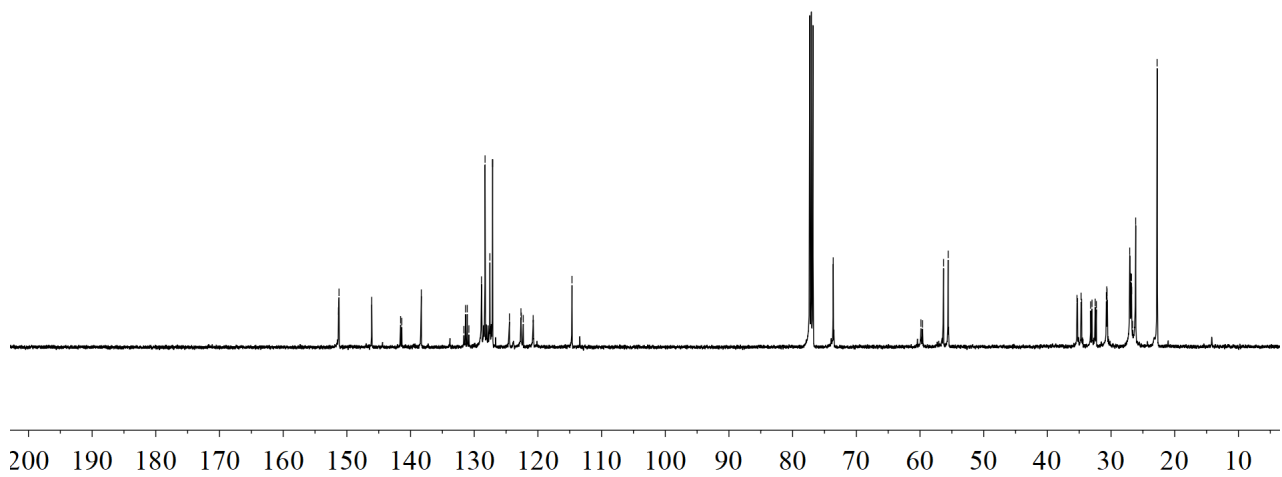

--6.695

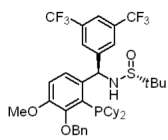

(R, R<sub>s</sub>)-Xu9-7

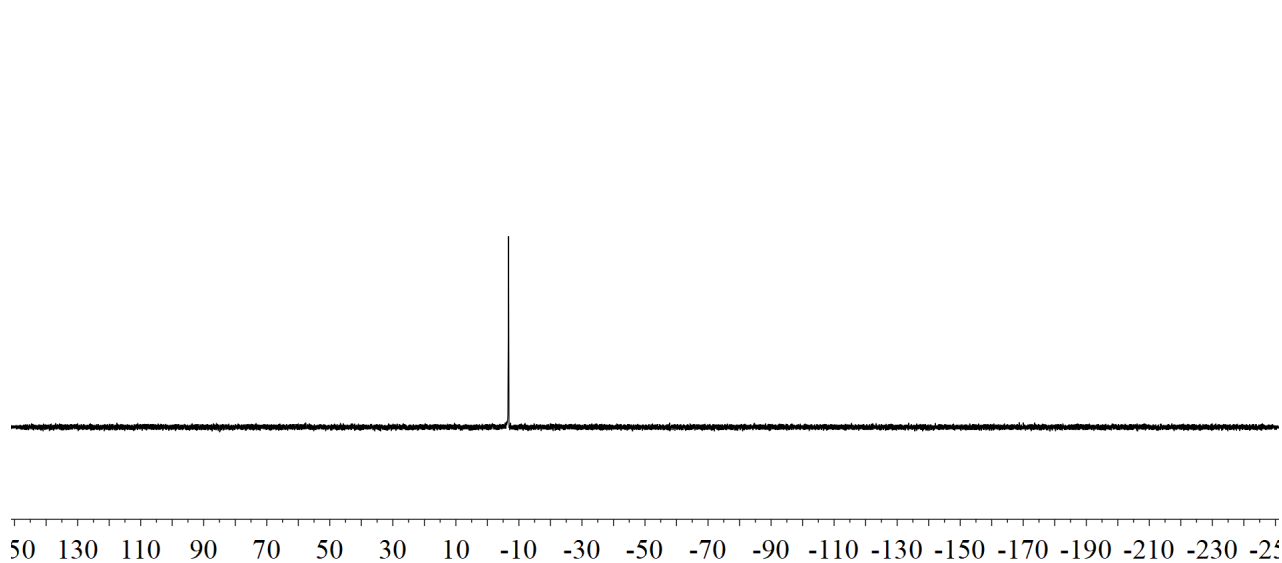

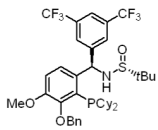

(R, R<sub>3</sub>)-Xu9-7

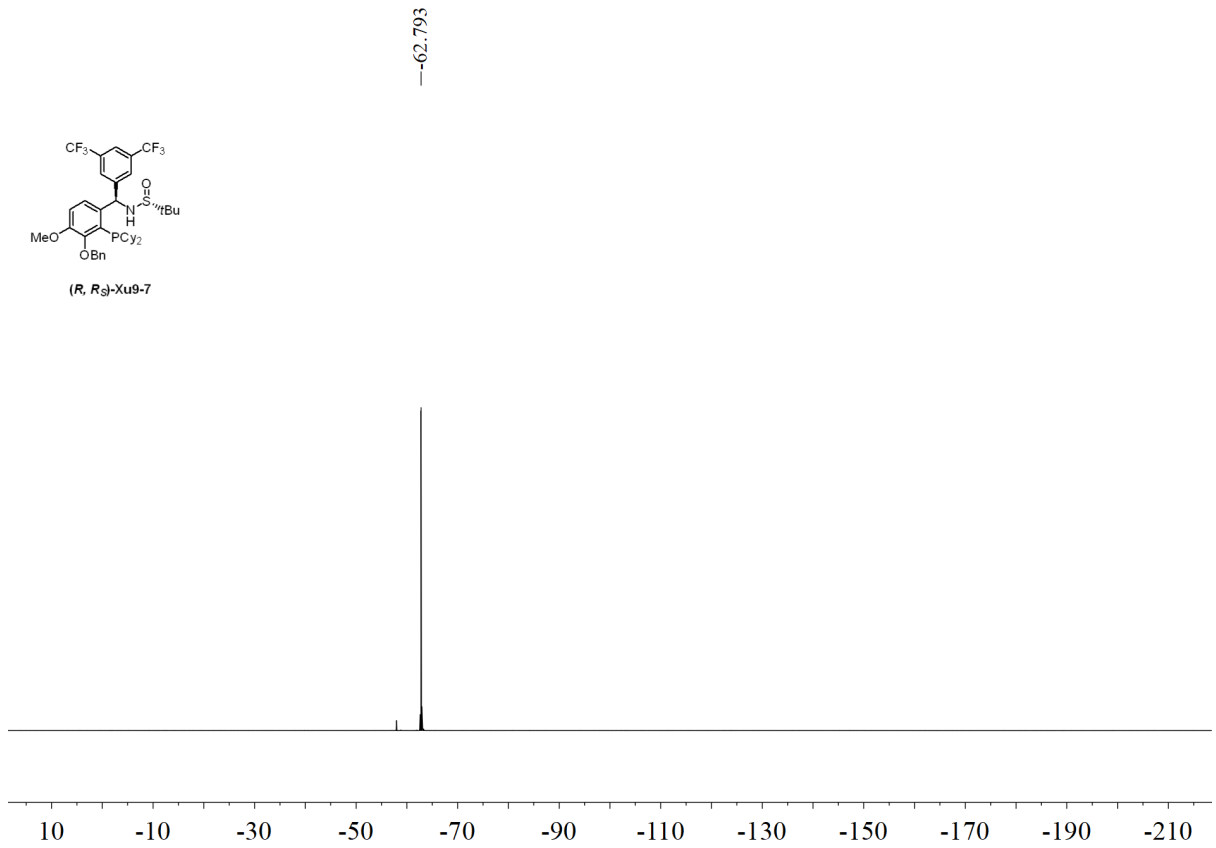

7.571  
7.561  
7.554  
7.545  
7.476  
7.471  
7.459  
7.453  
7.432  
7.417  
7.404  
7.390  
7.374  
7.337  
7.322  
7.309  
7.295  
7.260  
7.242  
7.099  
7.081  
7.037  
7.014  
5.213  
3.865  
2.645  
2.370  
2.347  
2.071  
2.048  
1.685  
1.666  
1.614  
1.496  
1.473  
1.367  
1.216  
1.189  
1.174  
1.154  
1.098  
1.074  
0.960  
0.934  
0.916  
0.896  
0.883  
0.858  
0.787  
0.762  
0.737

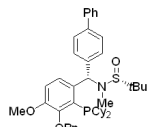

Xu8

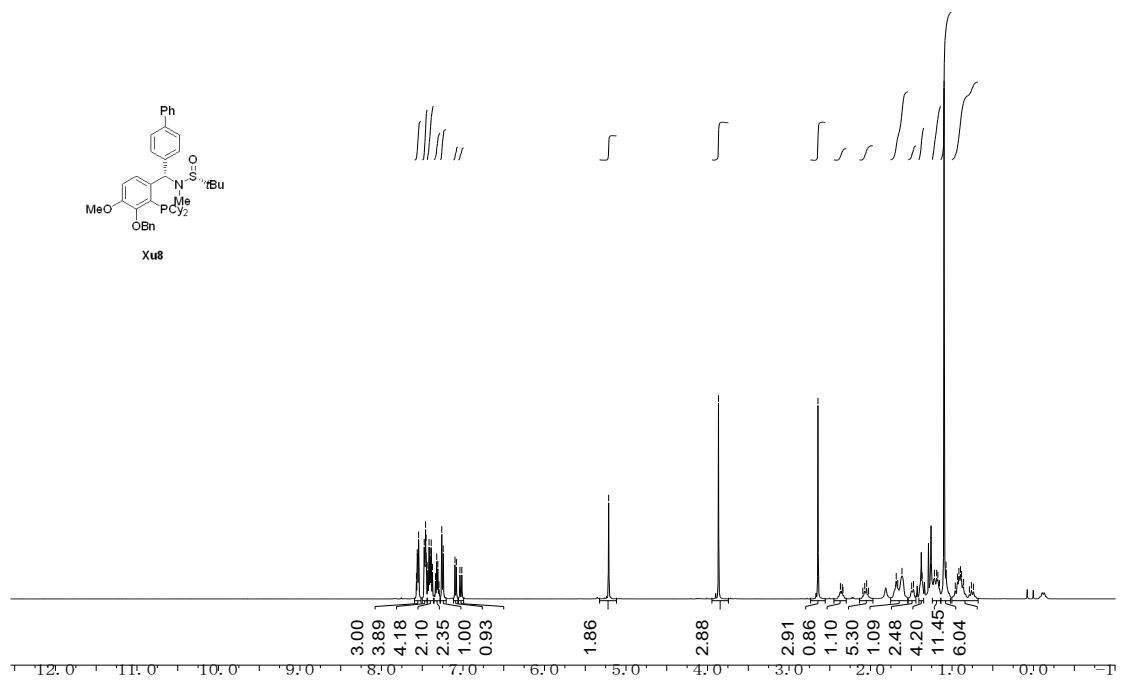

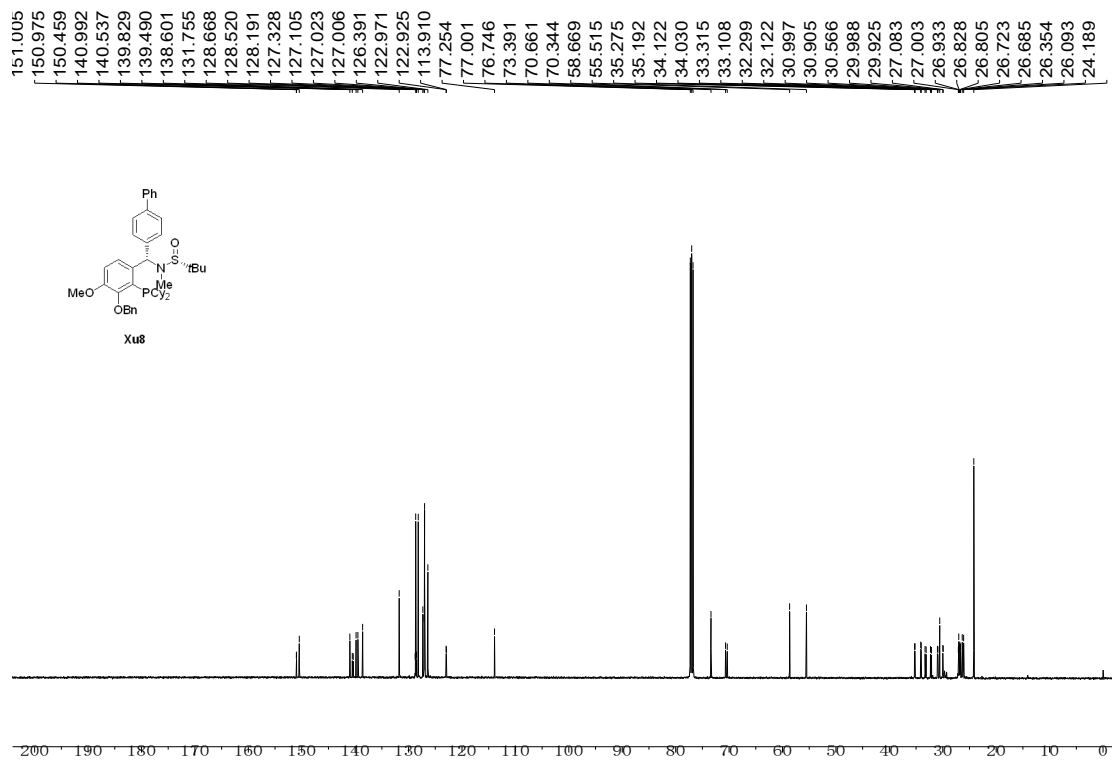

-6.114

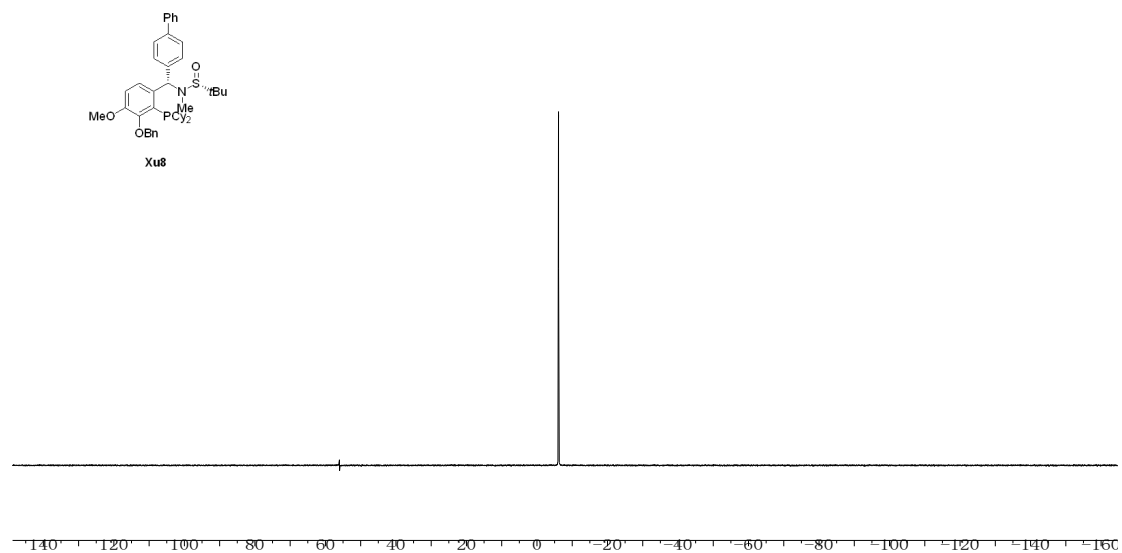

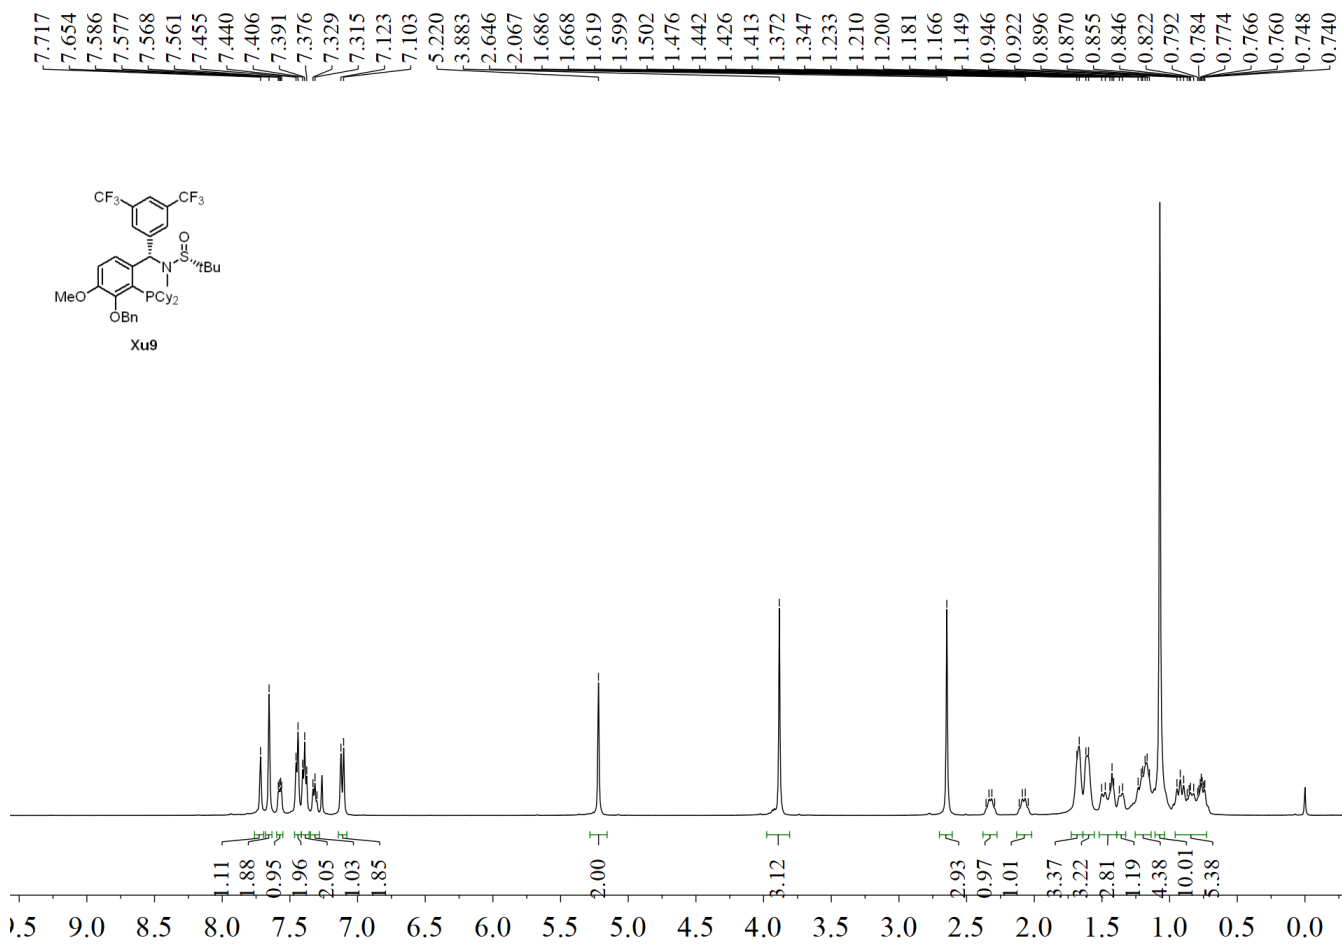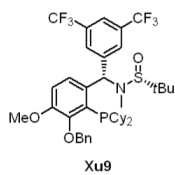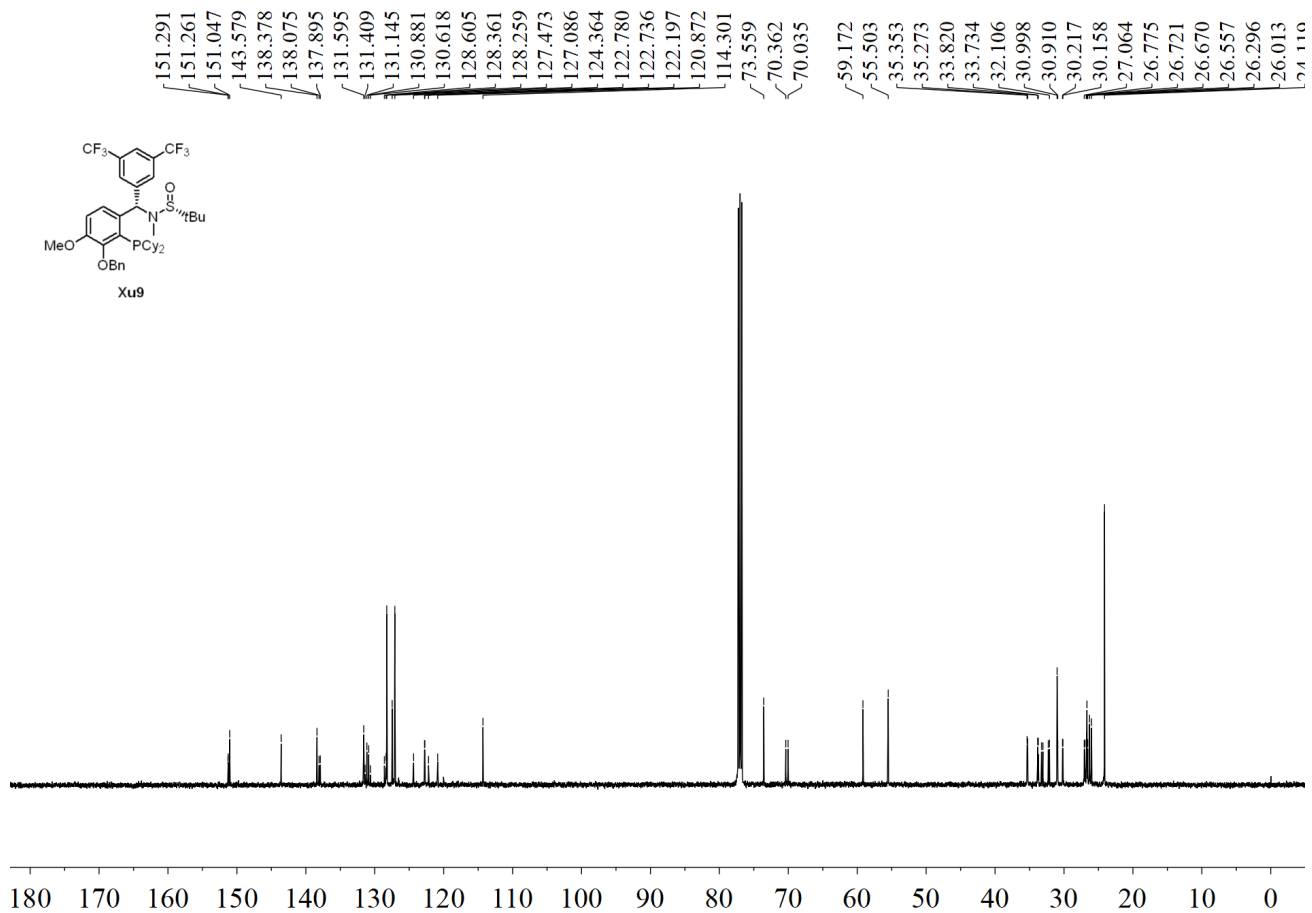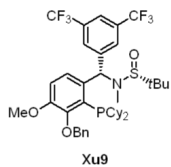



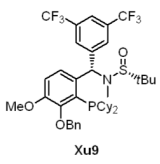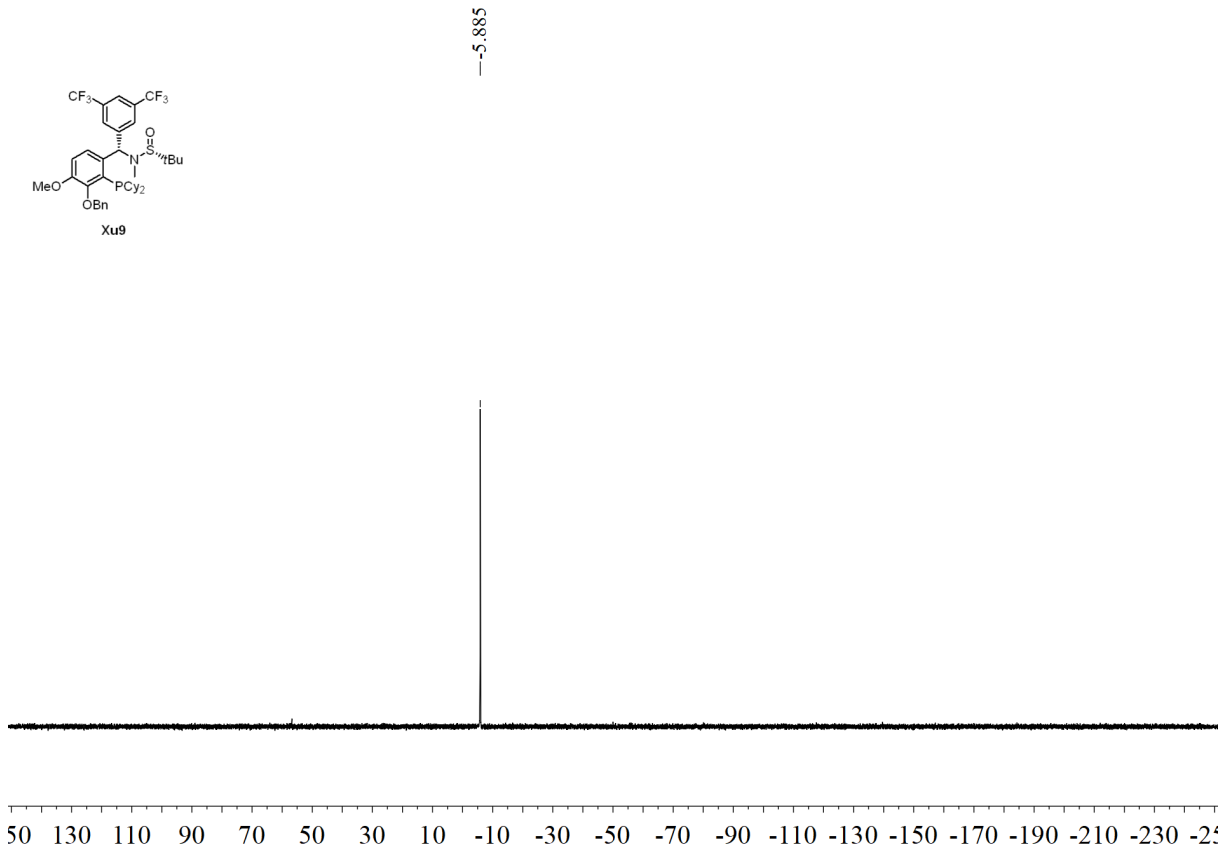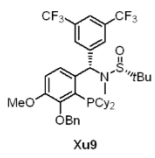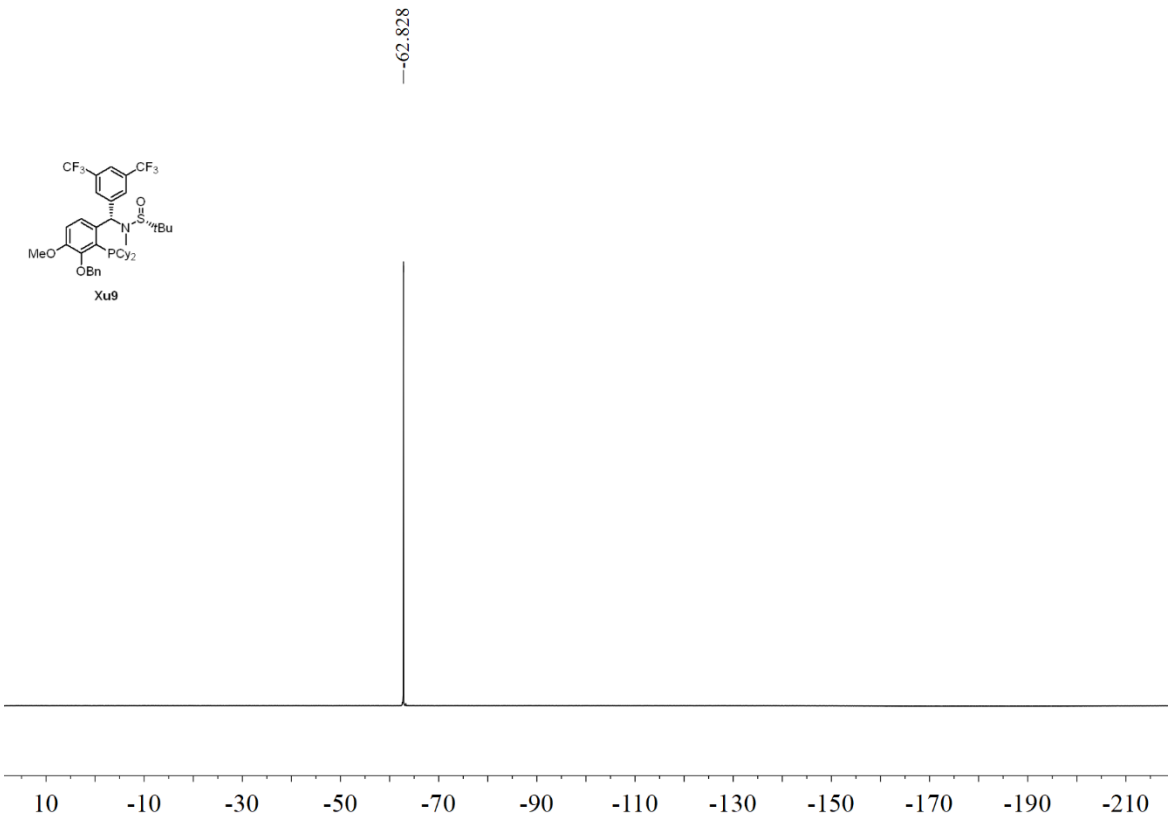

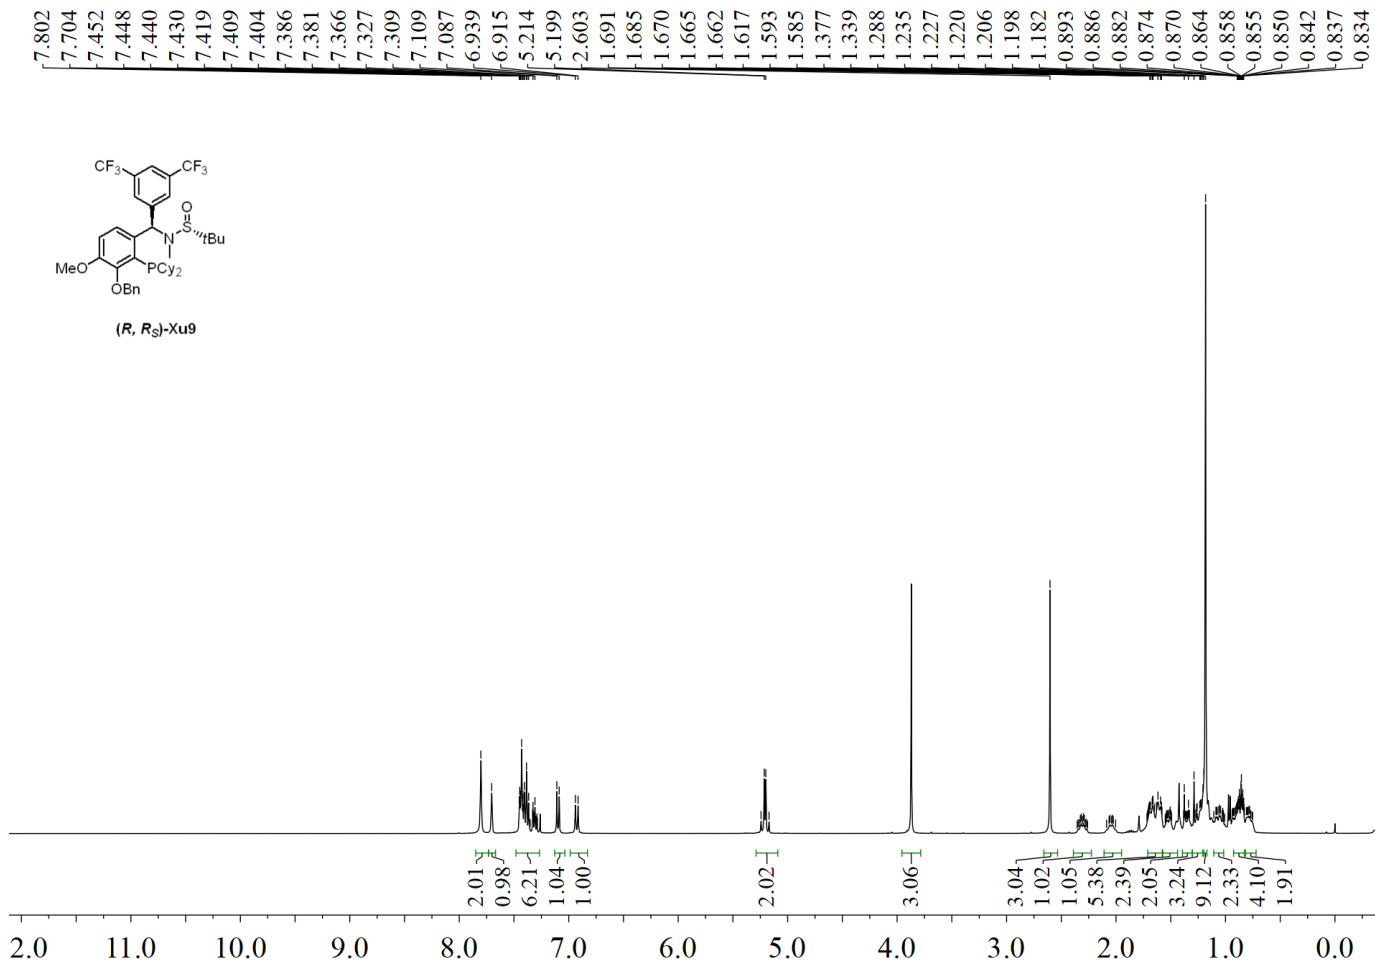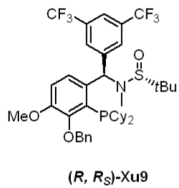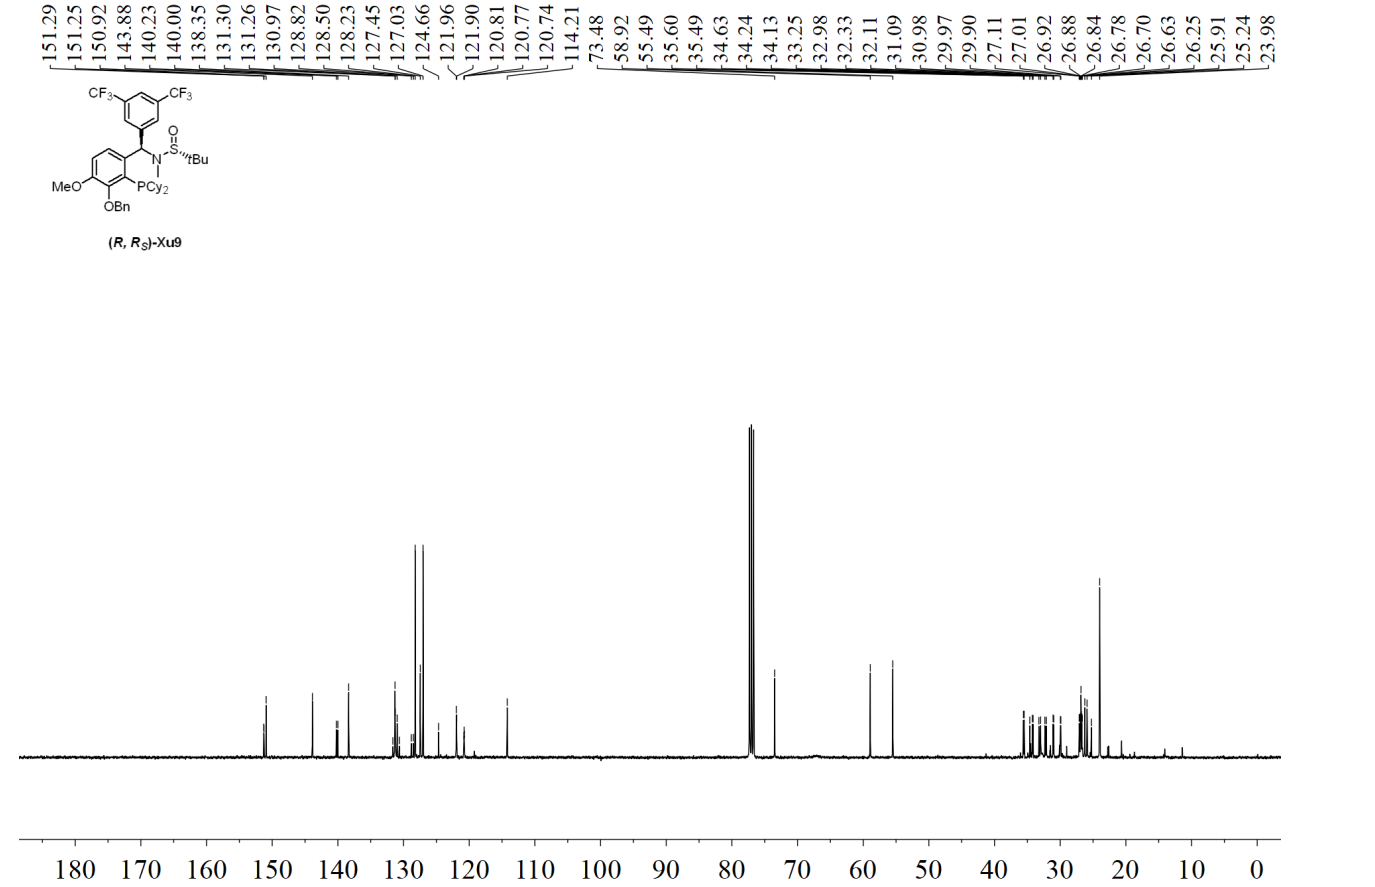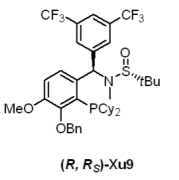

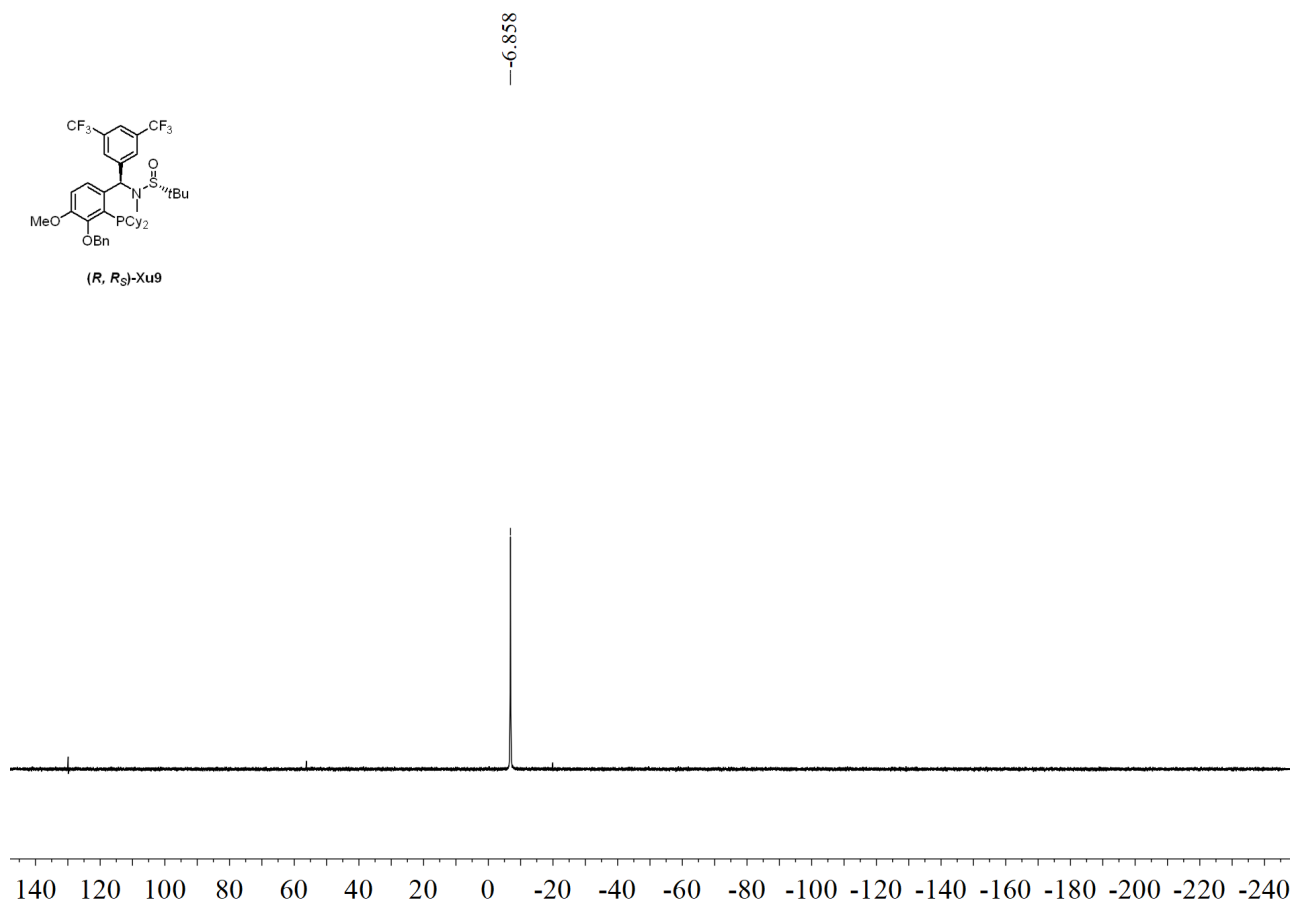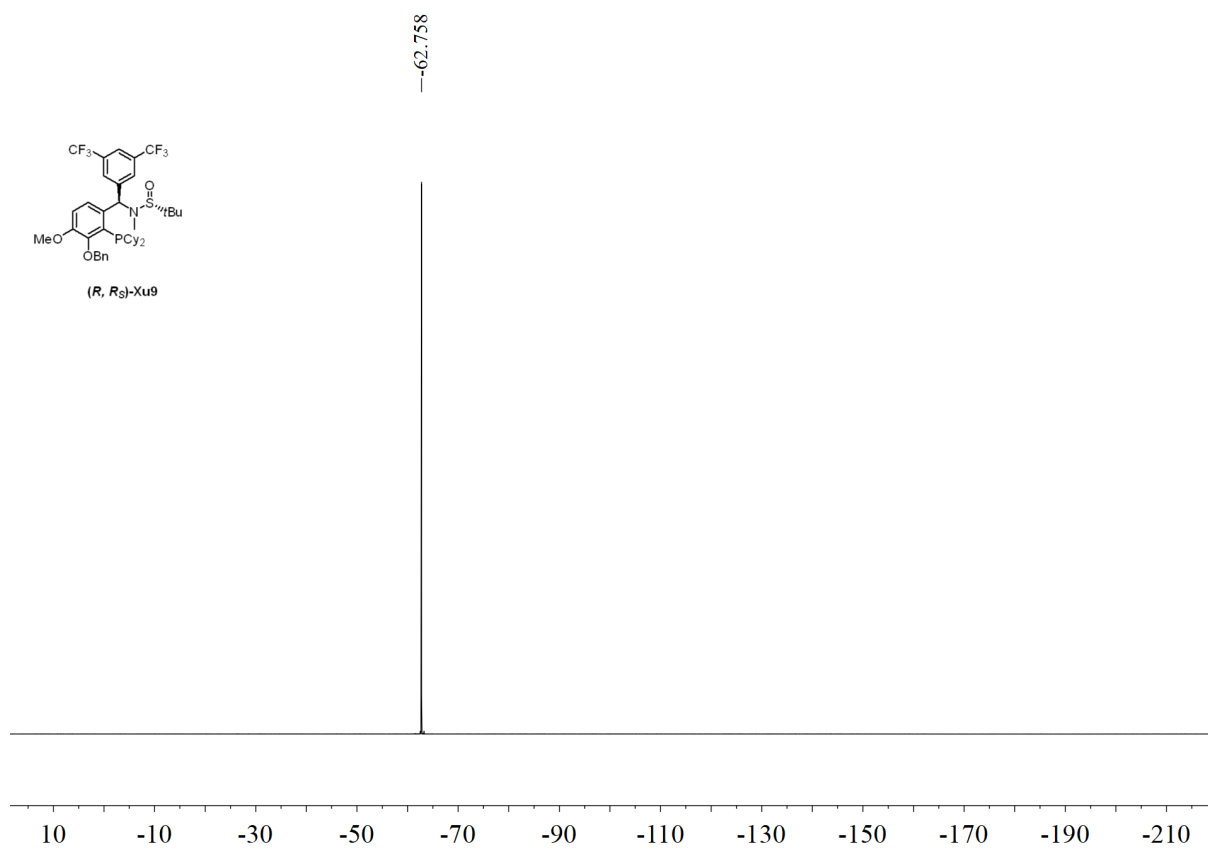

10.243  
7.712  
7.690  
7.466  
7.457  
7.448  
7.442  
7.427  
7.423  
7.413  
7.409  
7.404  
7.398  
7.383  
7.369  
7.364  
7.358  
7.347  
7.331  
7.324  
7.320  
7.313  
7.307  
7.302  
7.019  
6.997  
5.180  
5.043  
5.039

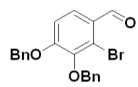

Xu10-2

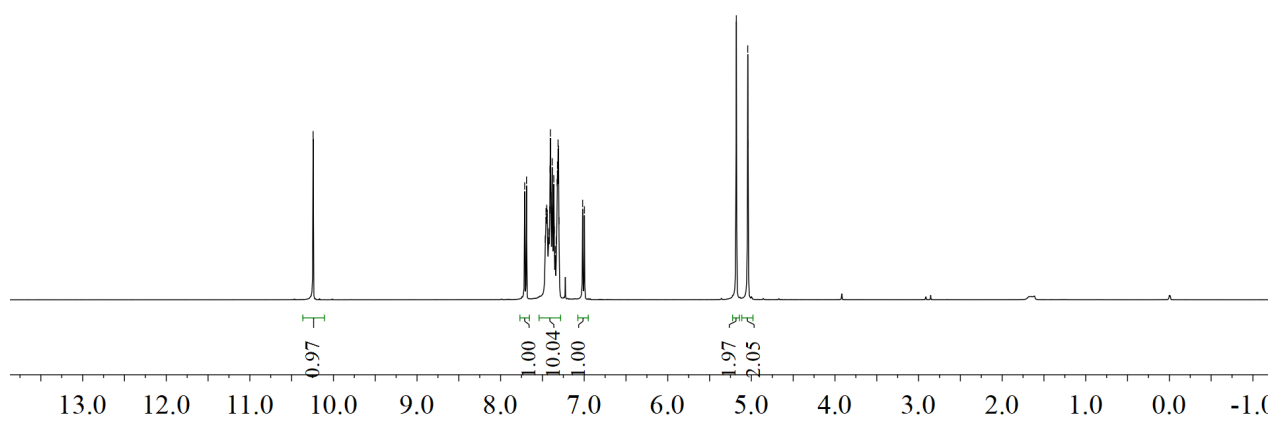

190.838  
157.707  
145.386  
136.452  
135.372  
128.669  
128.581  
128.400  
128.290  
128.227  
127.516  
127.426  
126.372  
123.551  
112.283  
74.781  
71.052

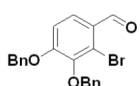

Xu10-2

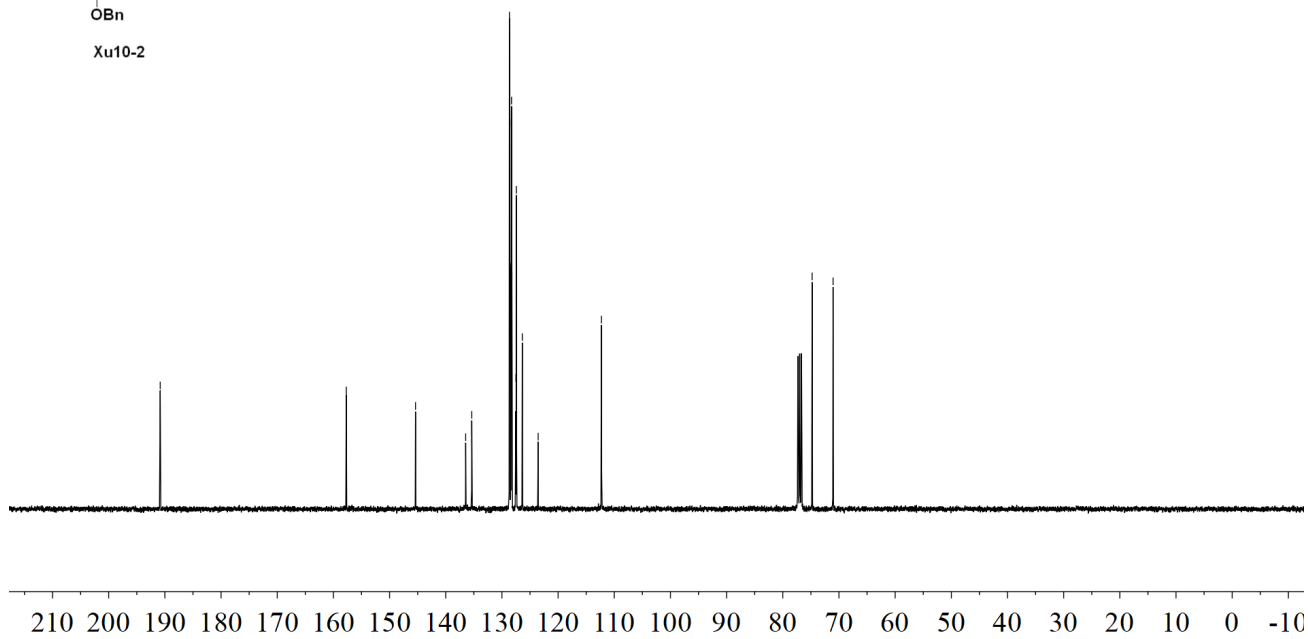

7.419  
7.412  
7.399  
7.395  
7.351  
7.339  
7.335  
7.331  
7.290  
7.288  
7.273  
7.268  
7.262  
7.258  
7.251  
7.245  
7.236  
7.230  
7.227  
6.895  
6.873  
5.466  
5.046  
4.955

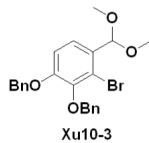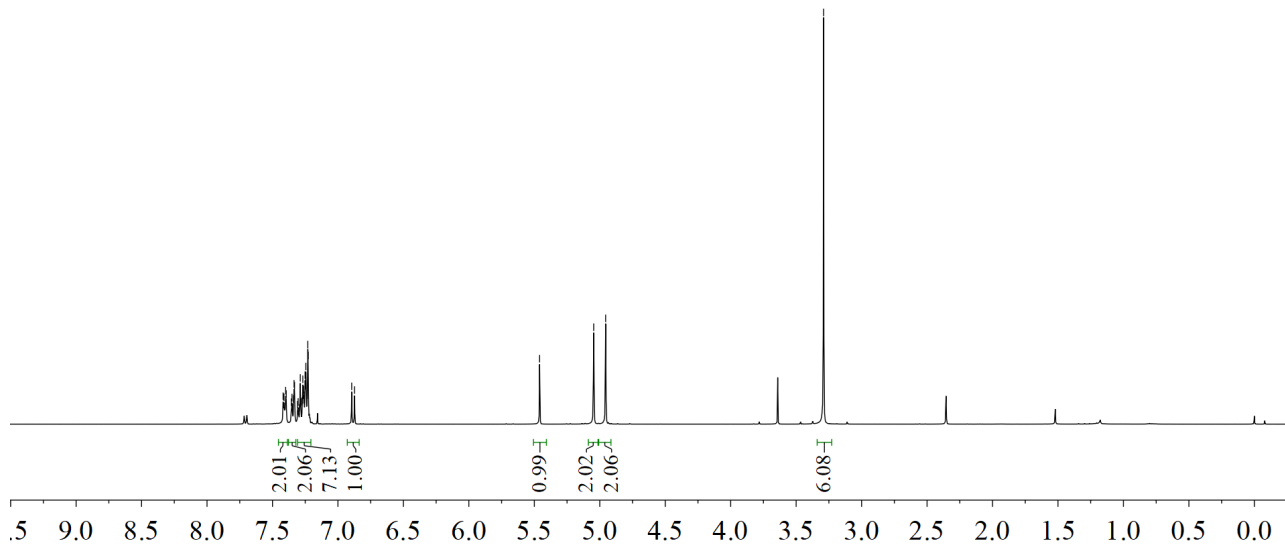

153.042  
145.693  
137.083  
136.456  
130.445  
129.895  
128.643  
128.624  
128.321  
128.149  
128.101  
127.492  
123.482  
119.403  
112.772  
103.079  
-74.727  
-71.156  
-53.946

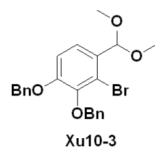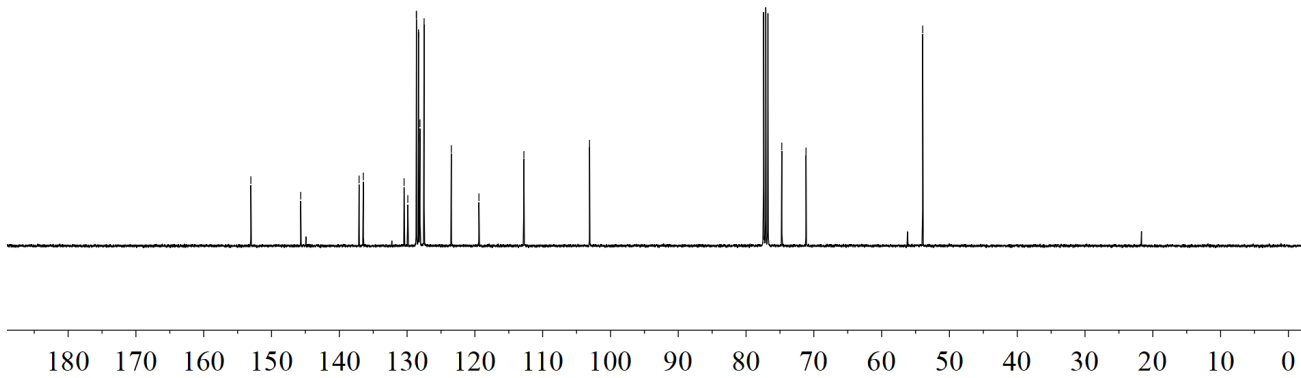

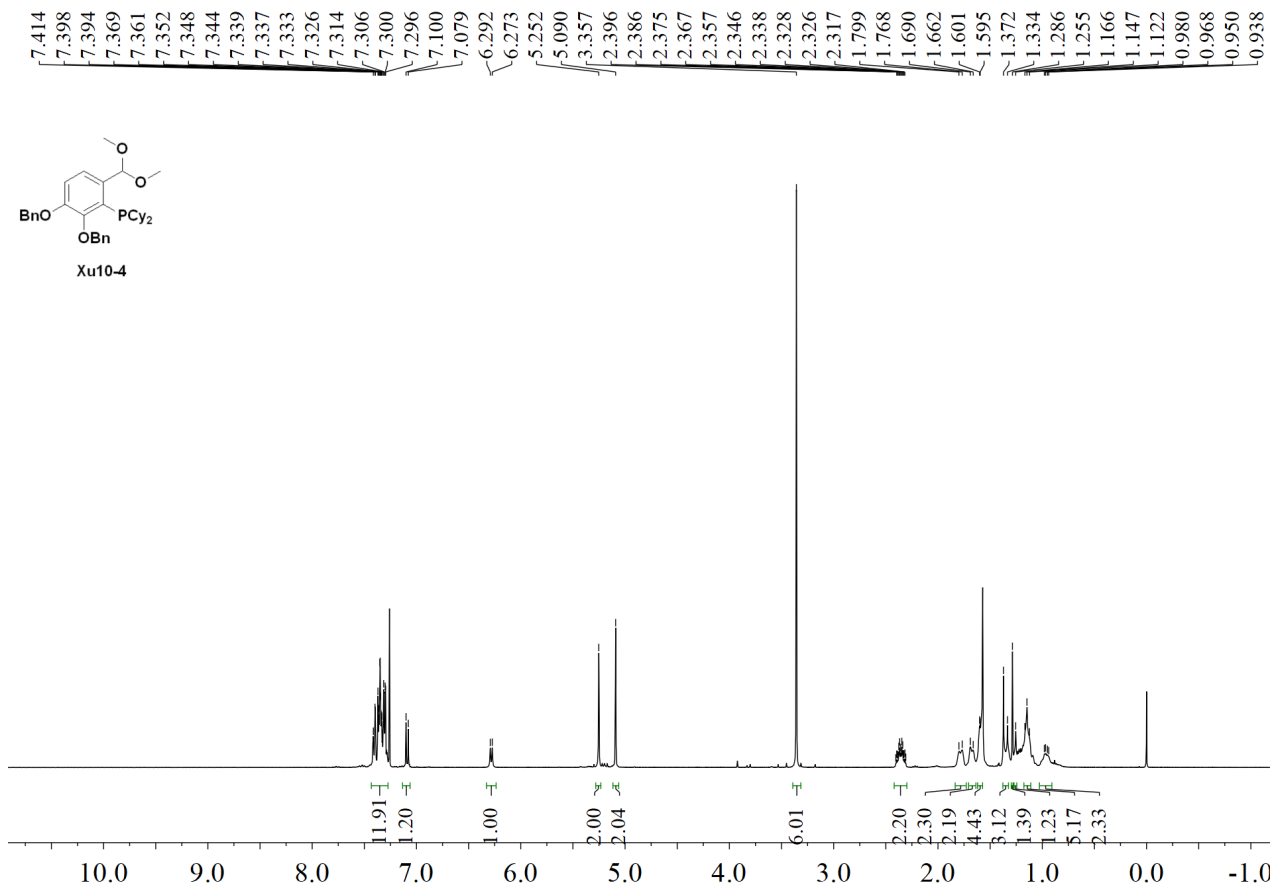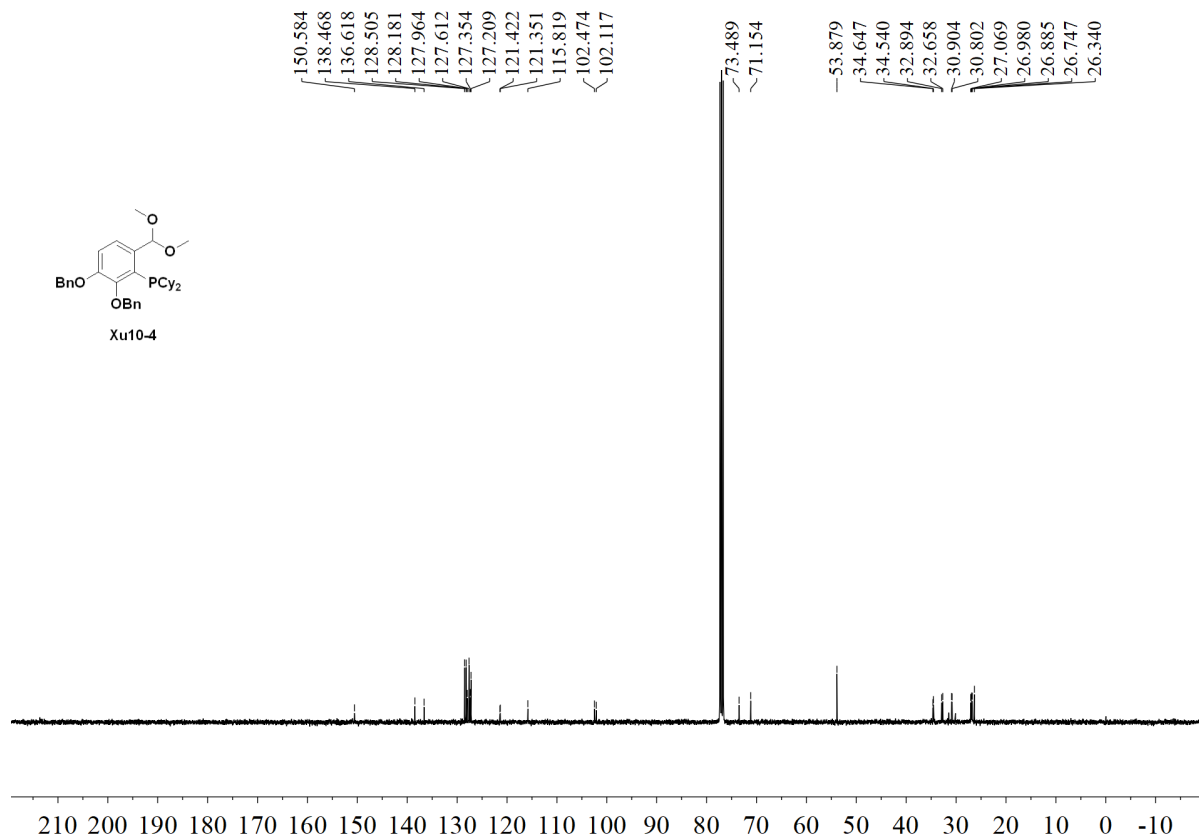

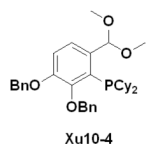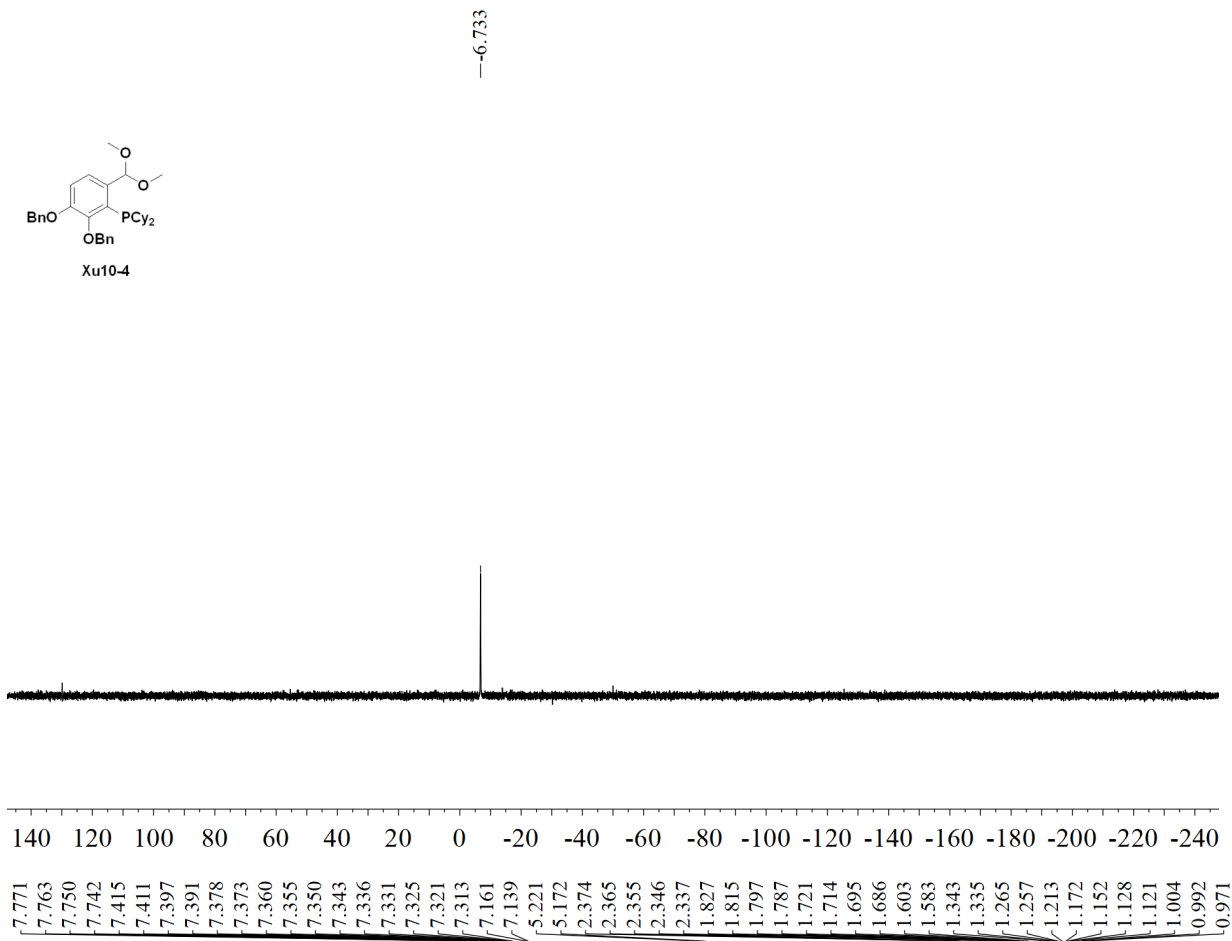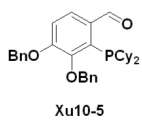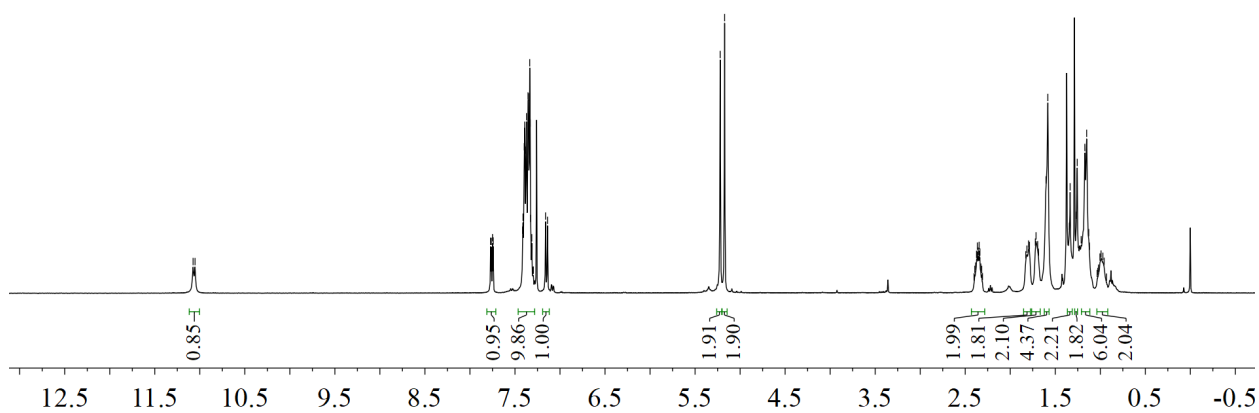

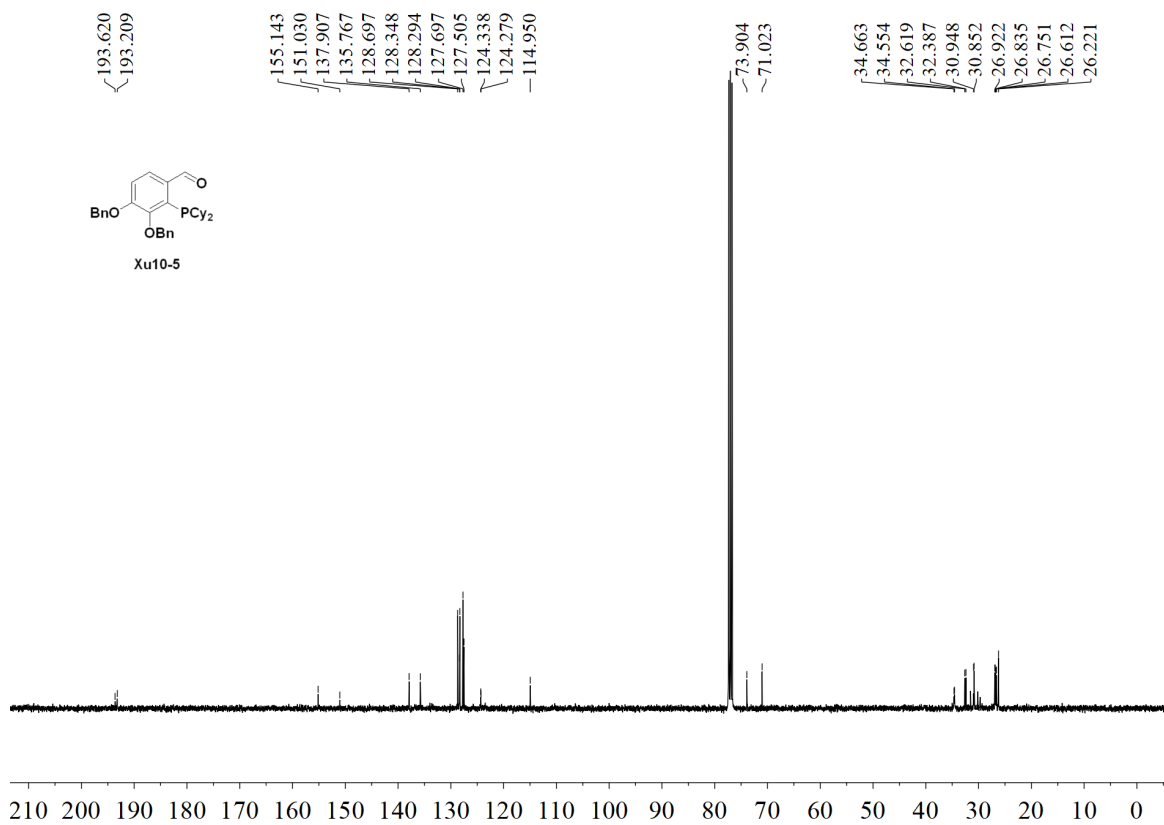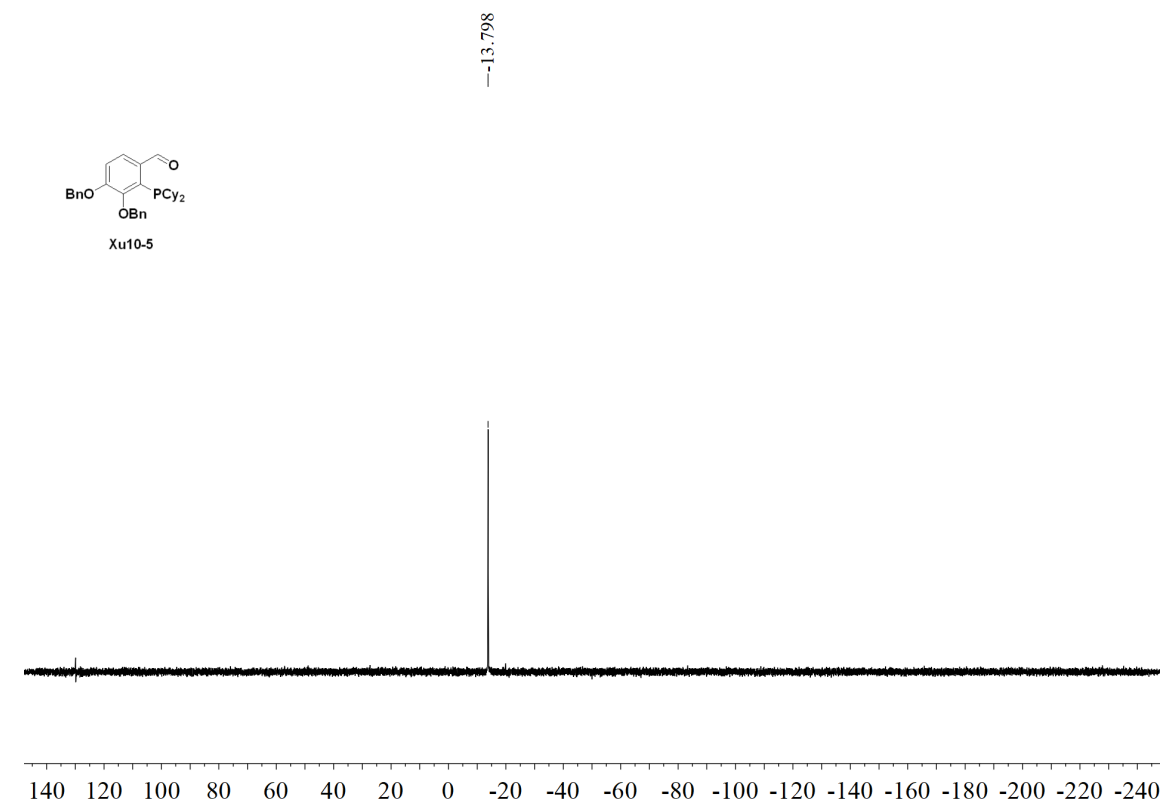



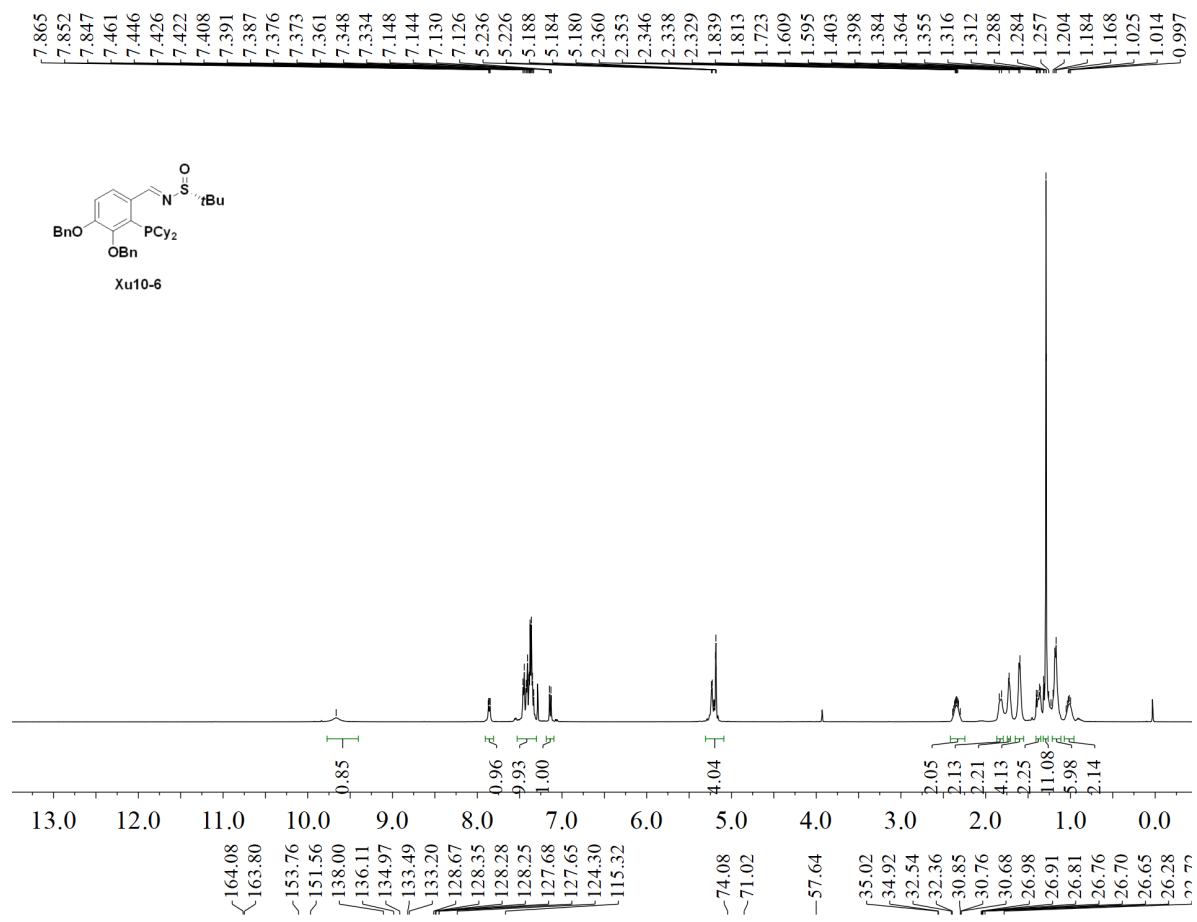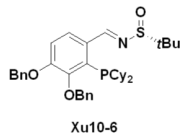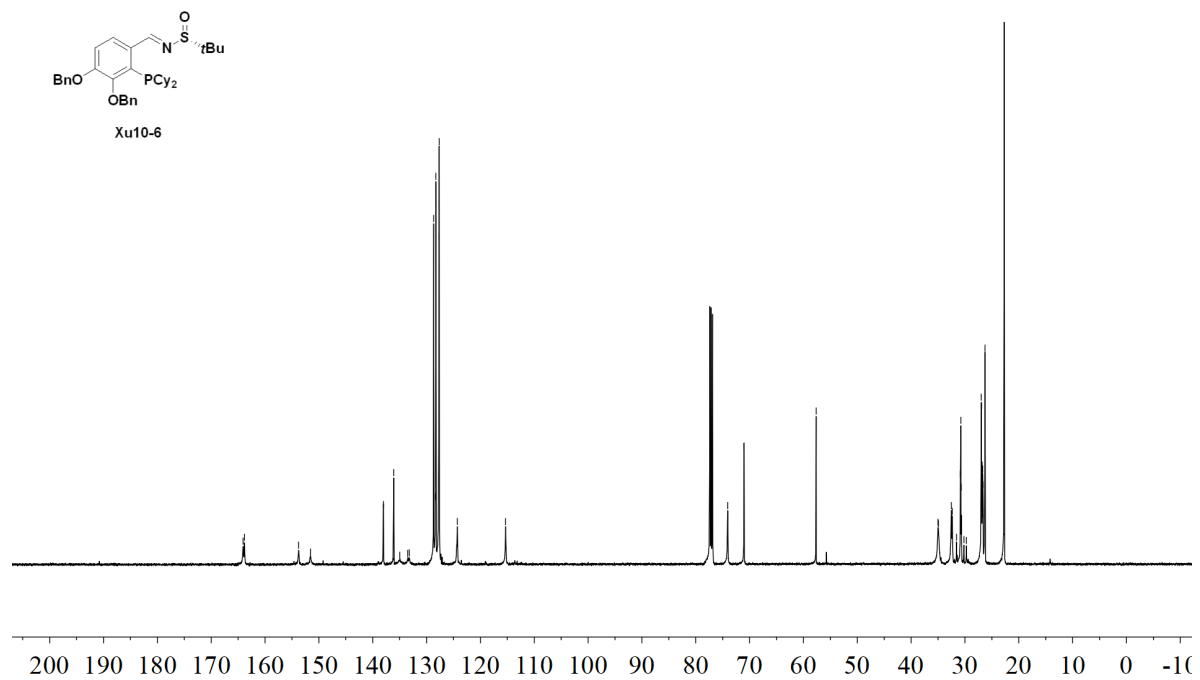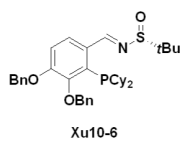

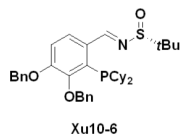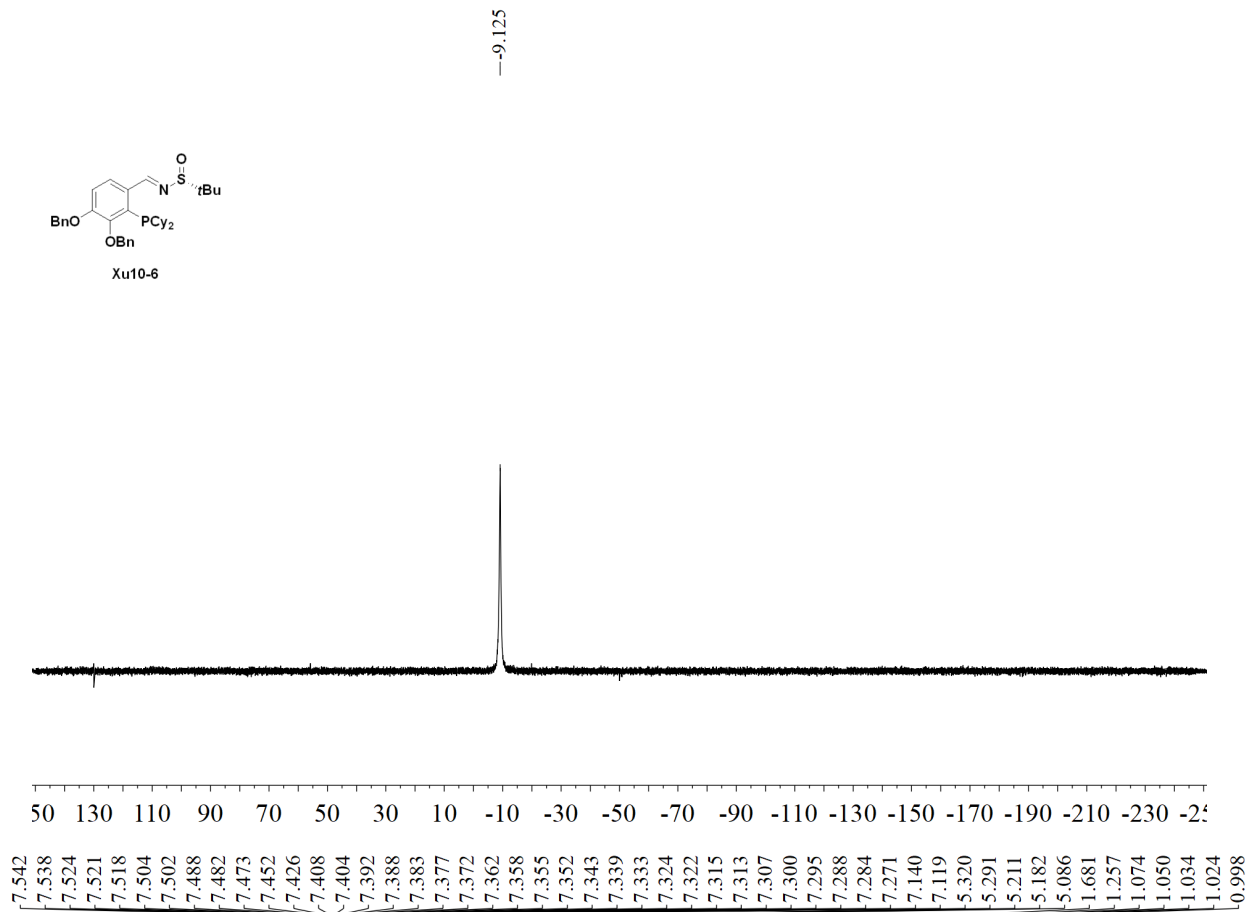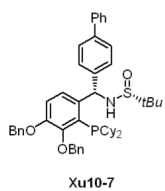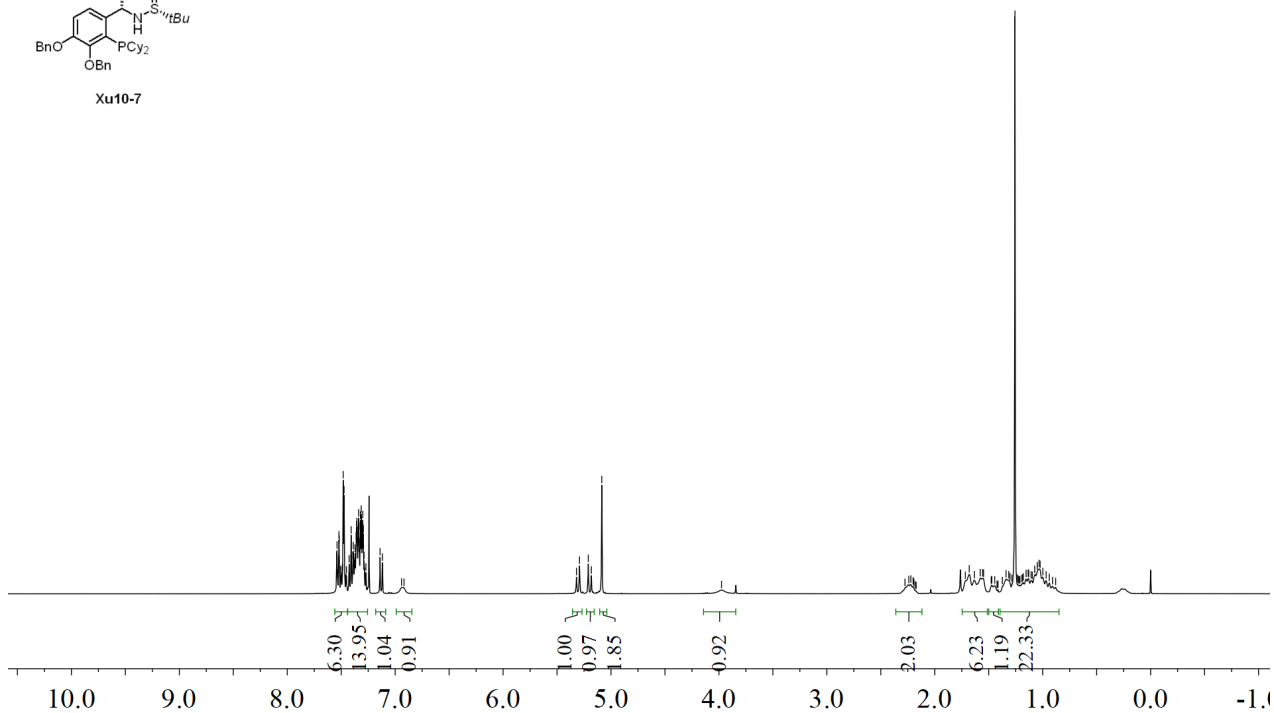

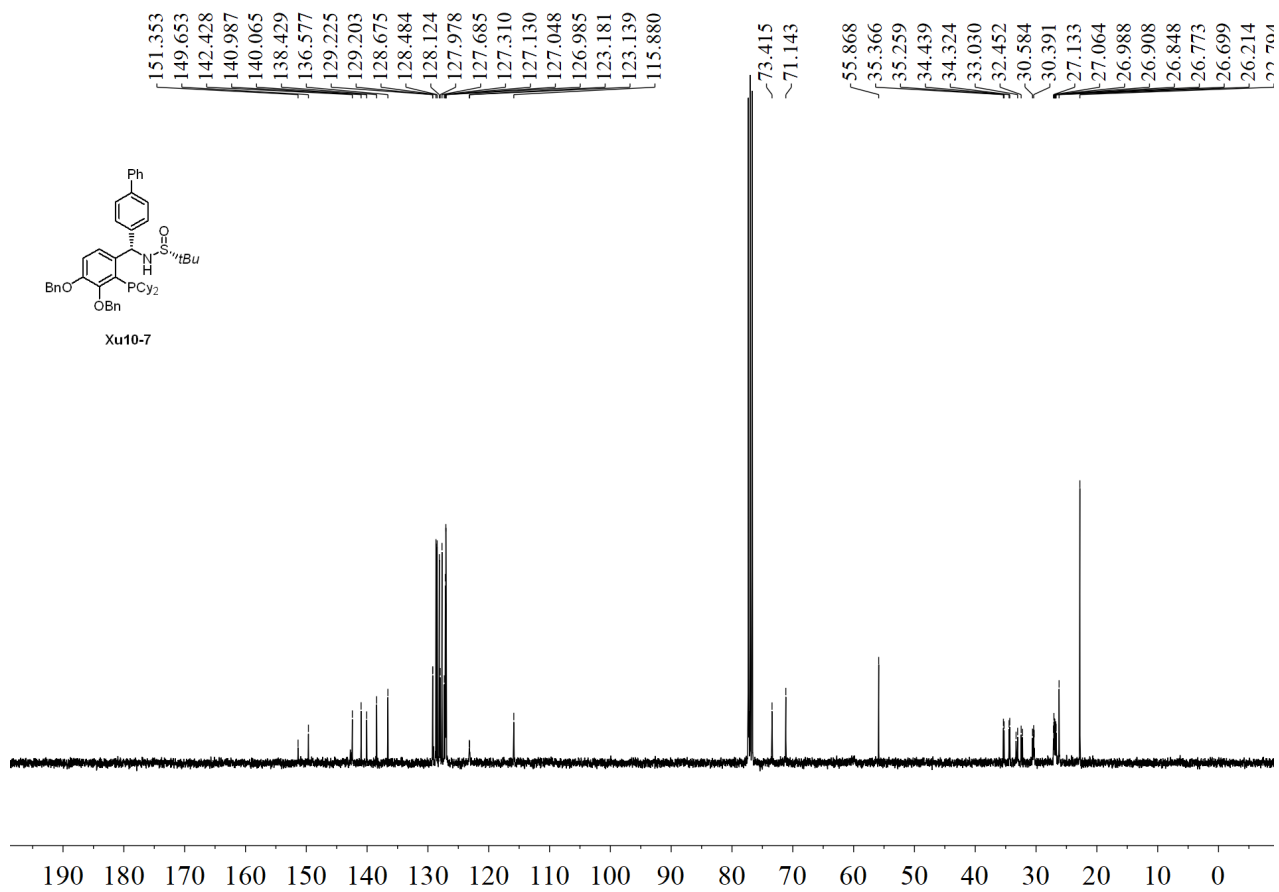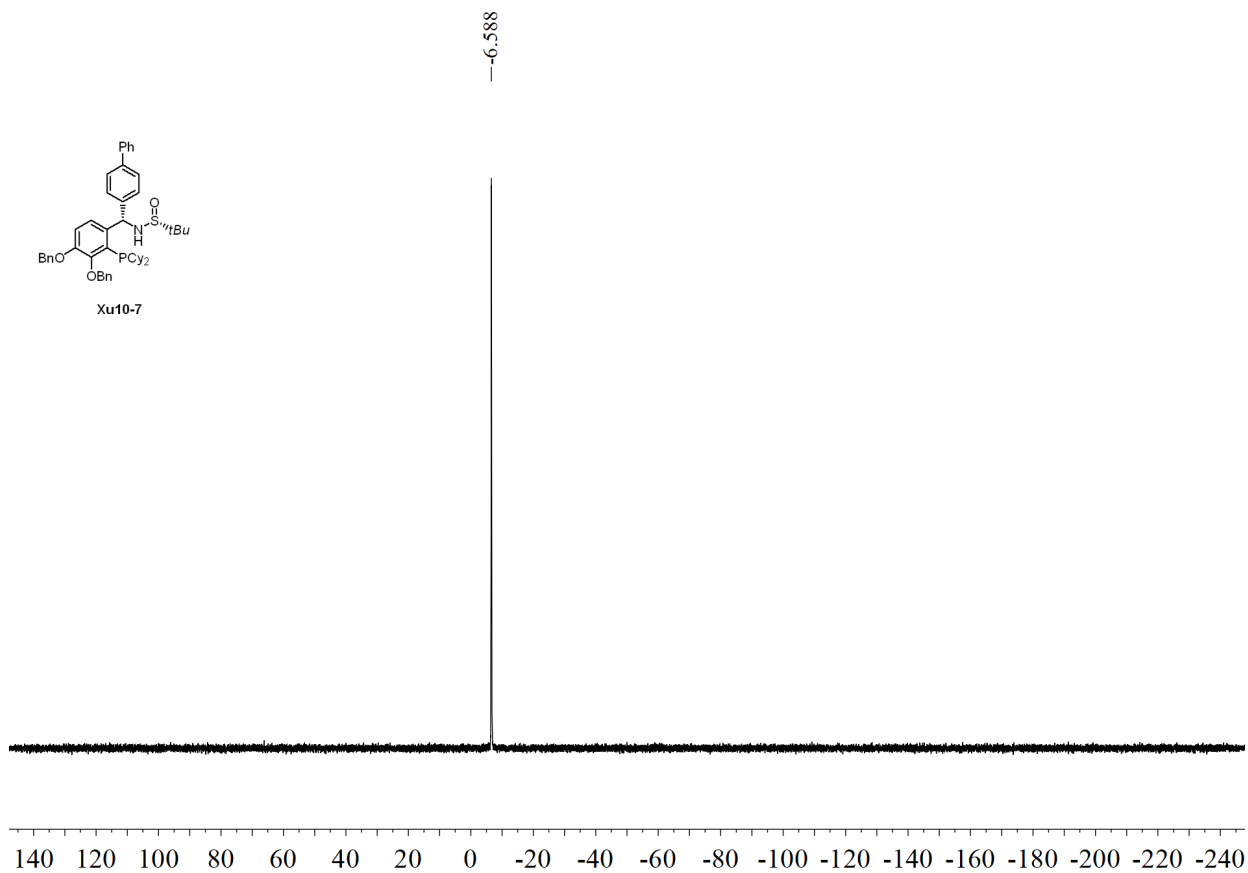

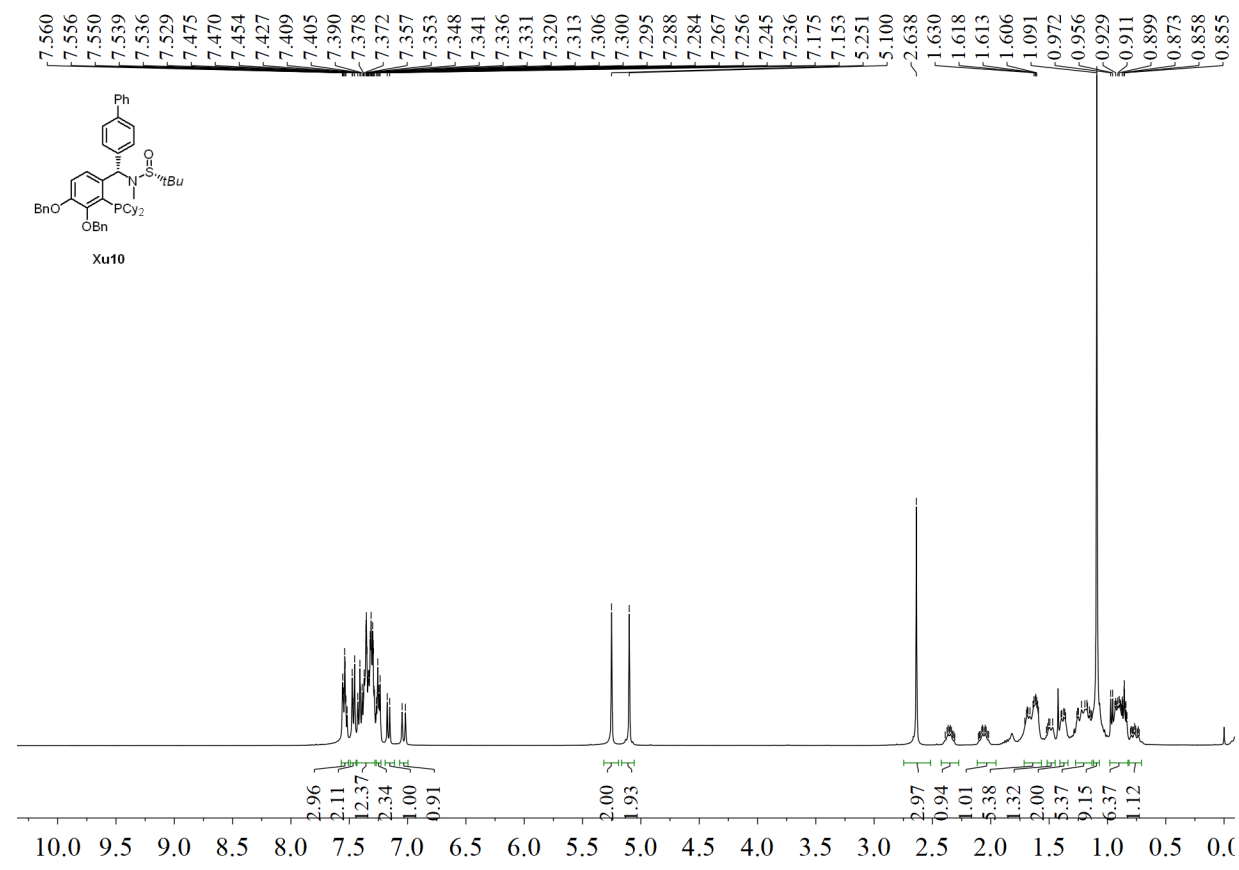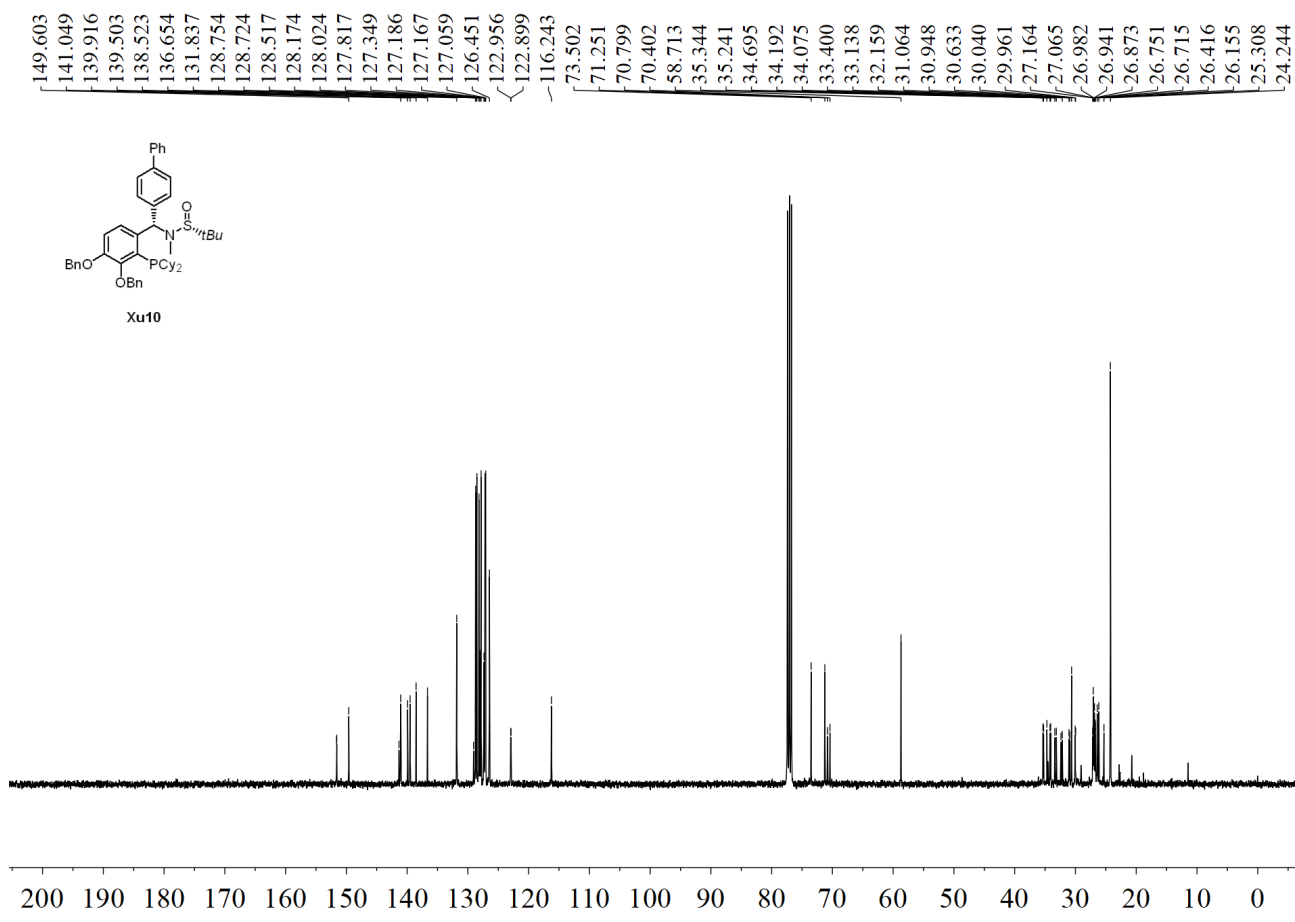

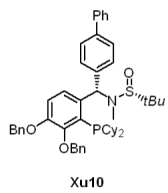

--5.942

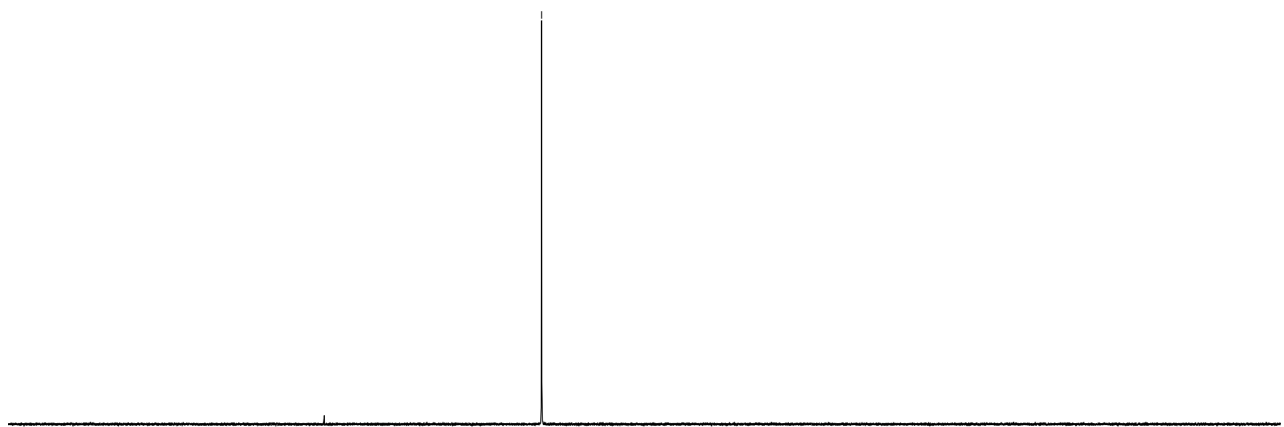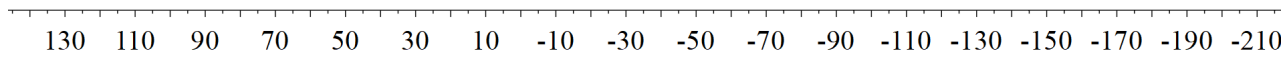

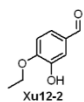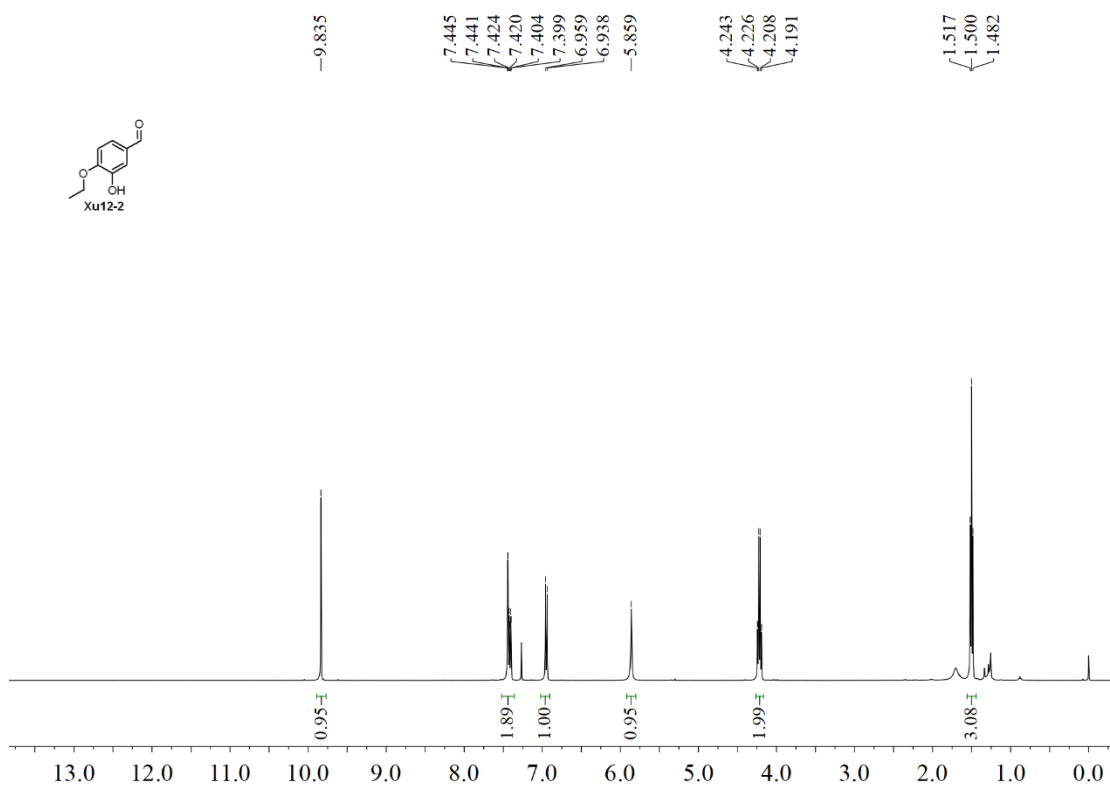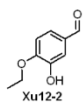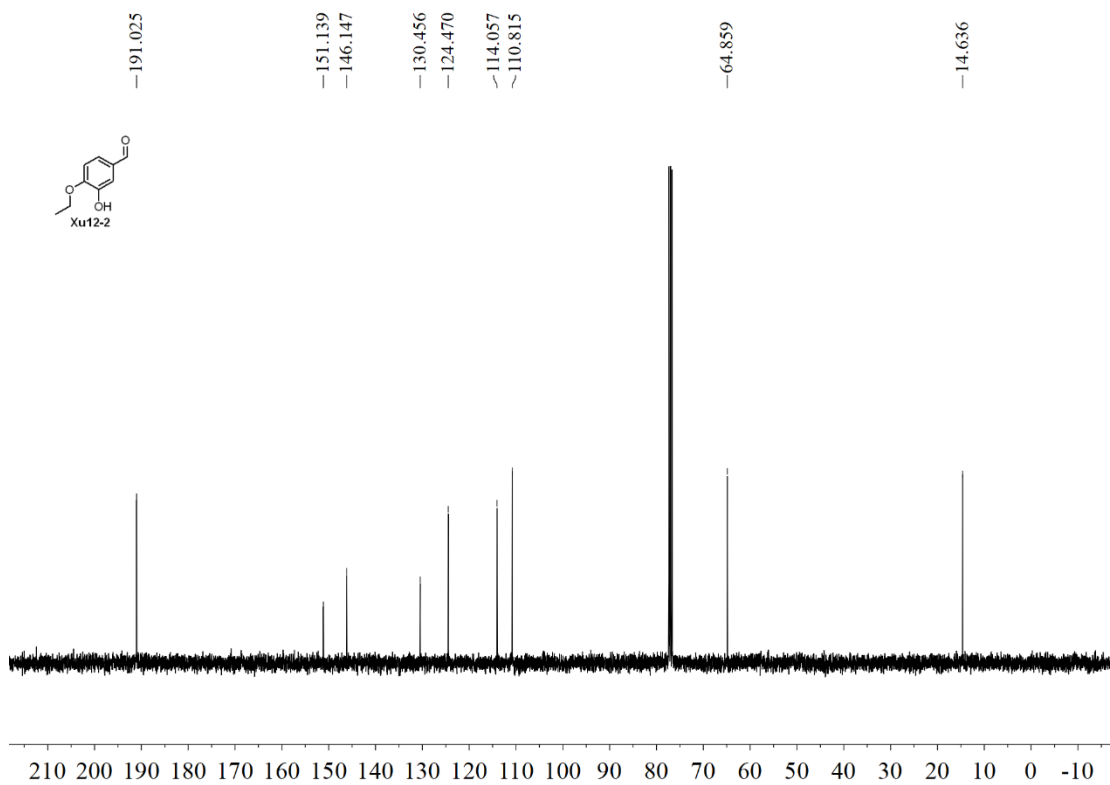

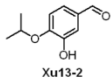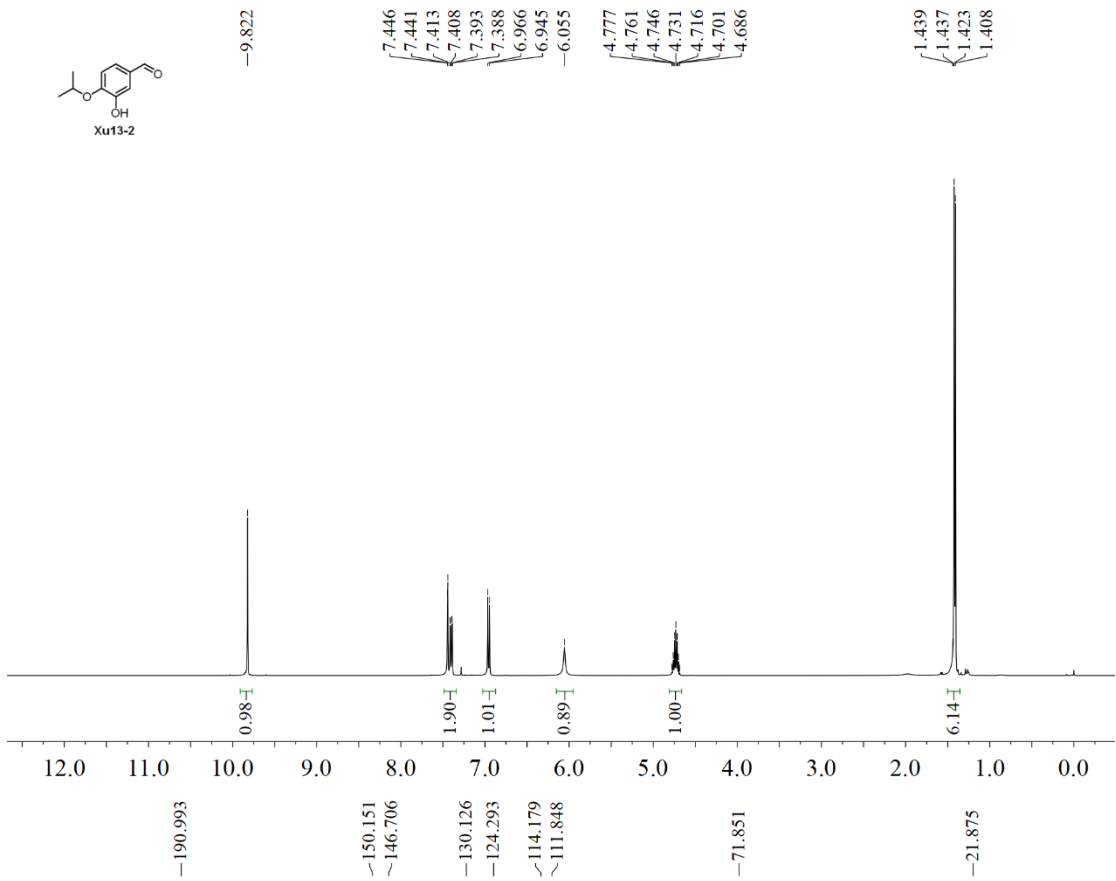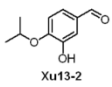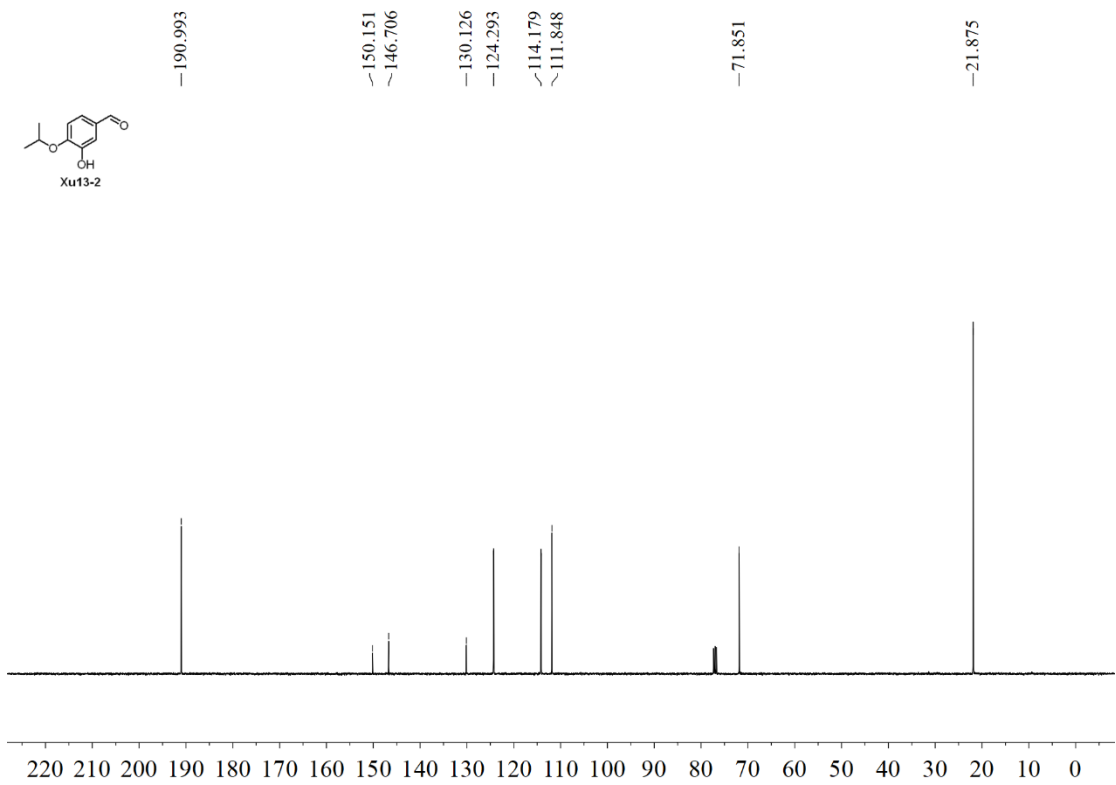

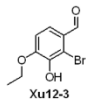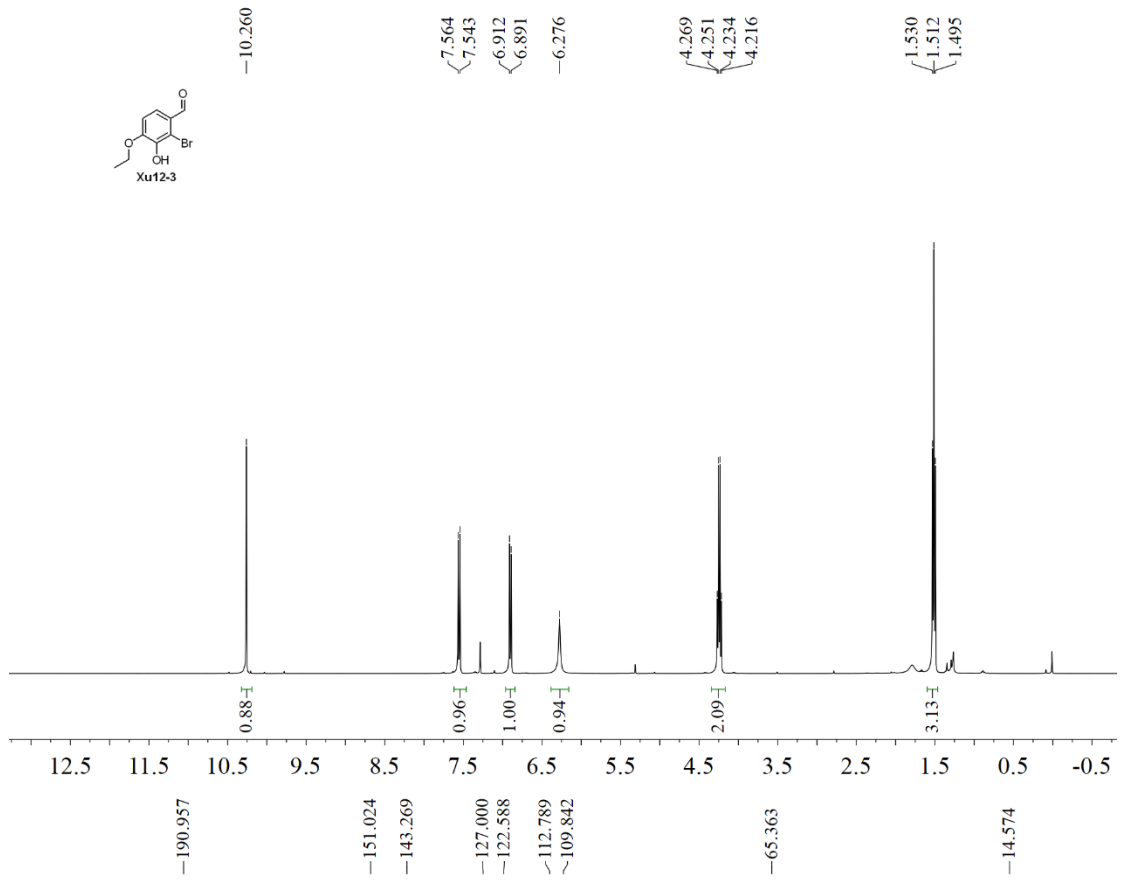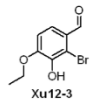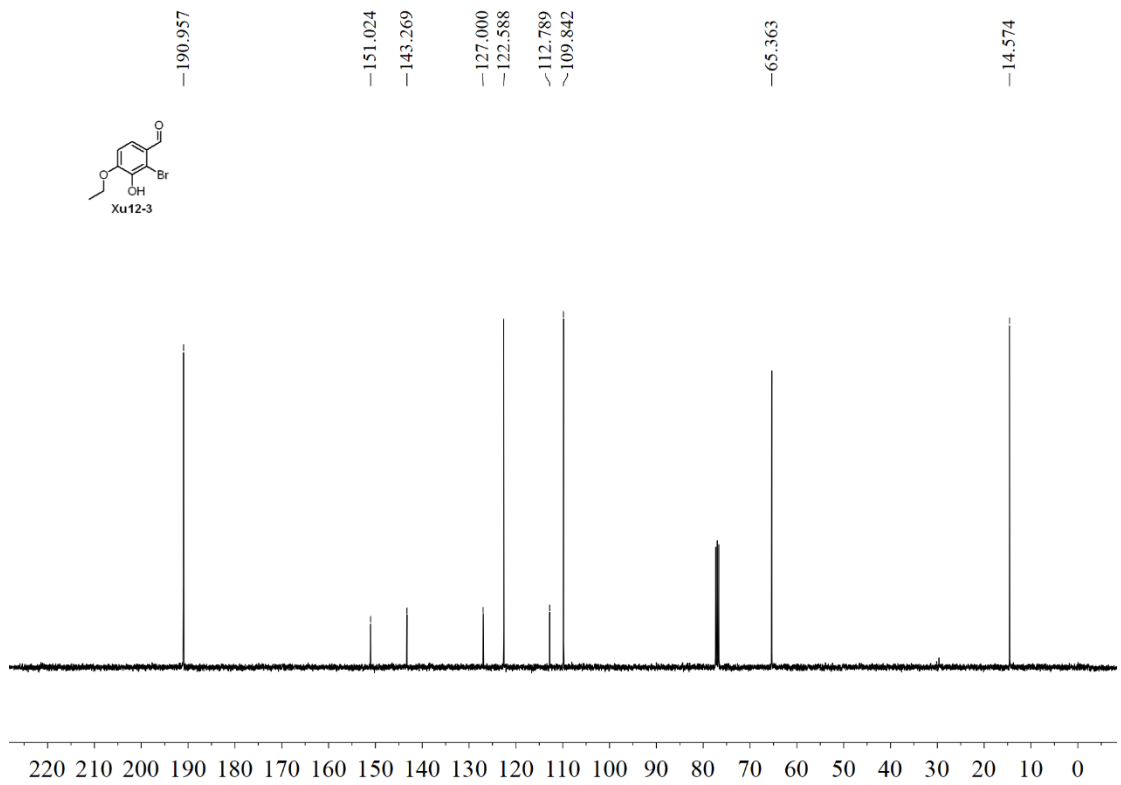



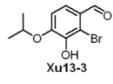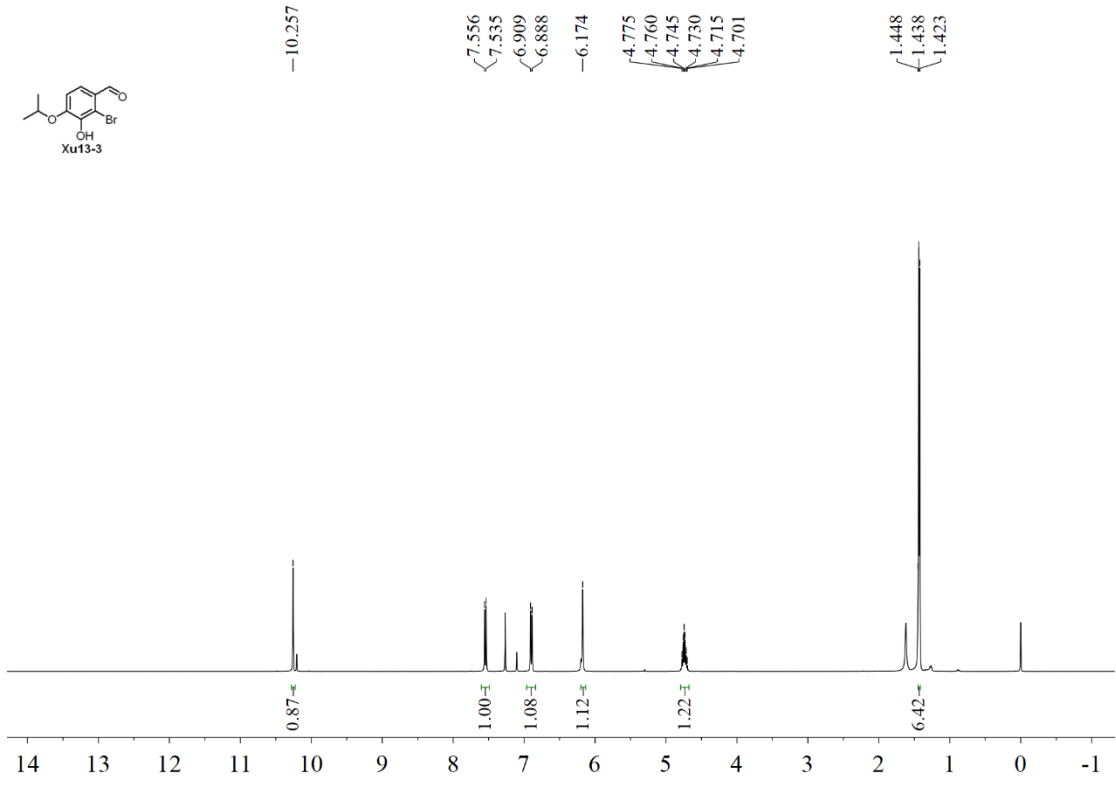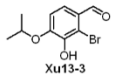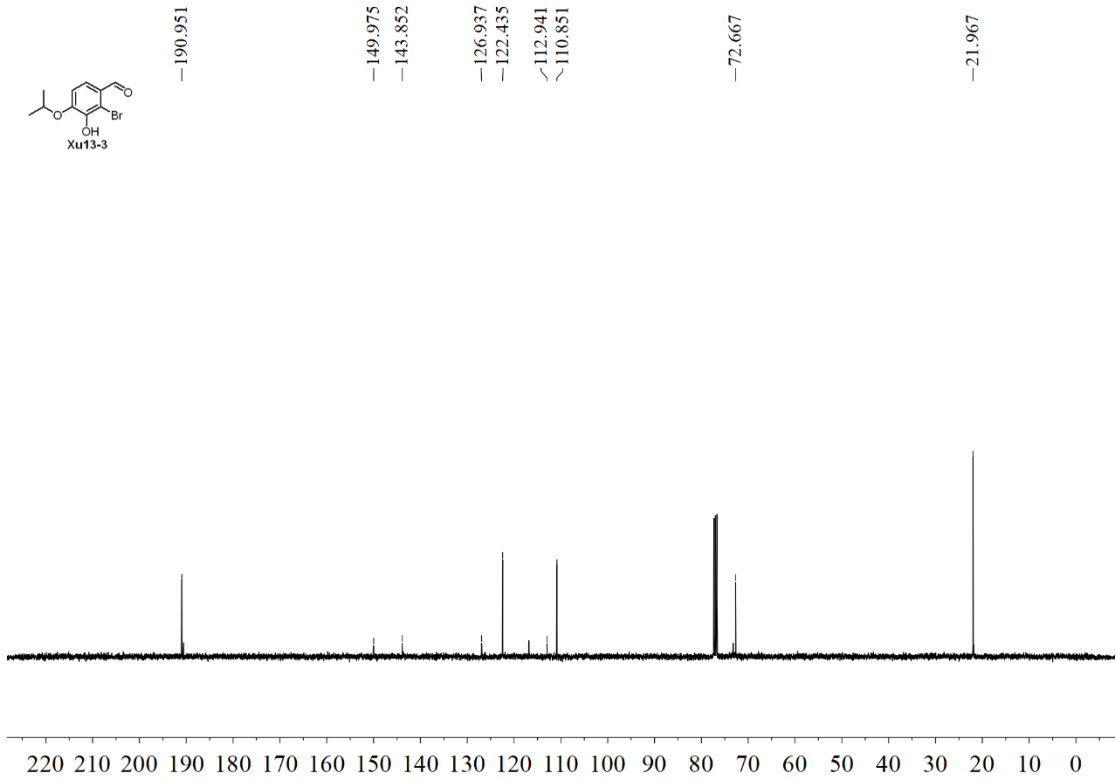

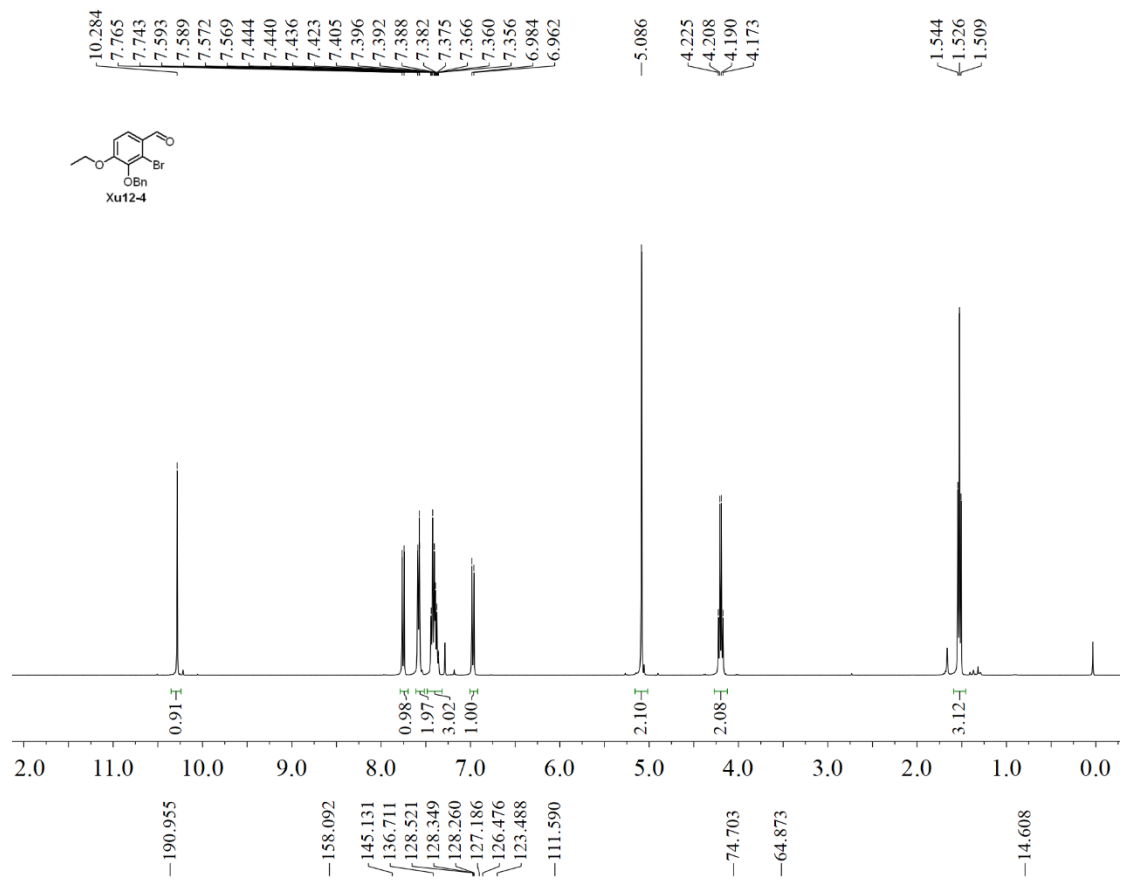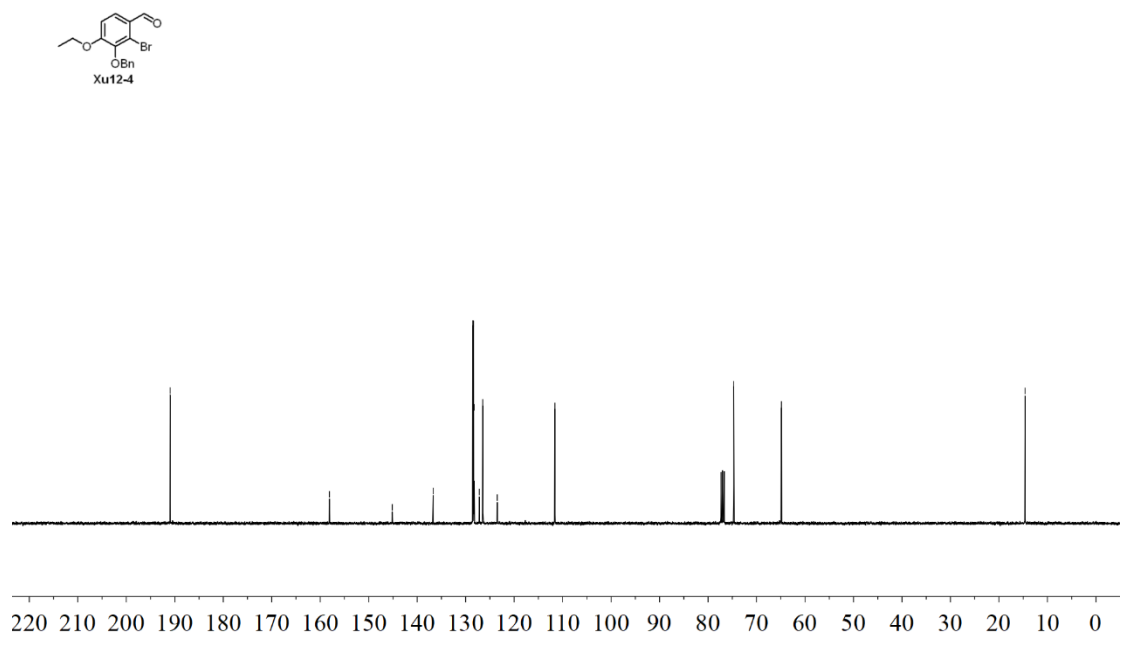

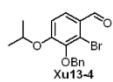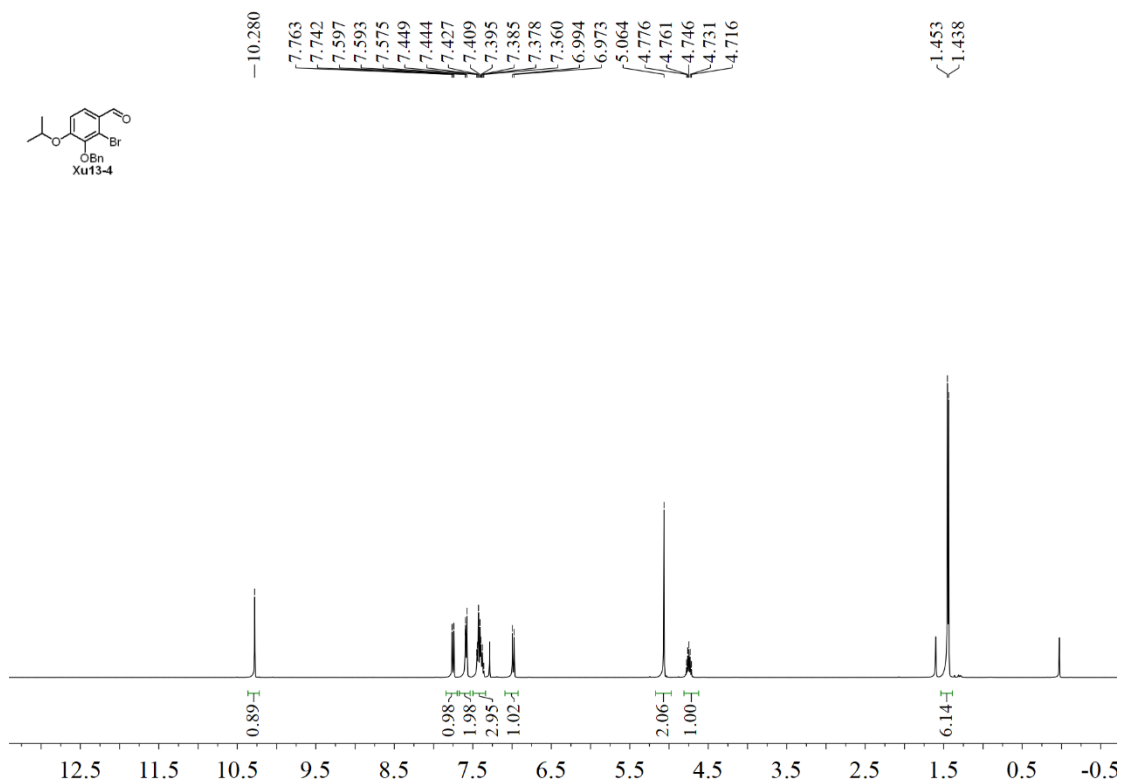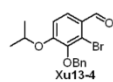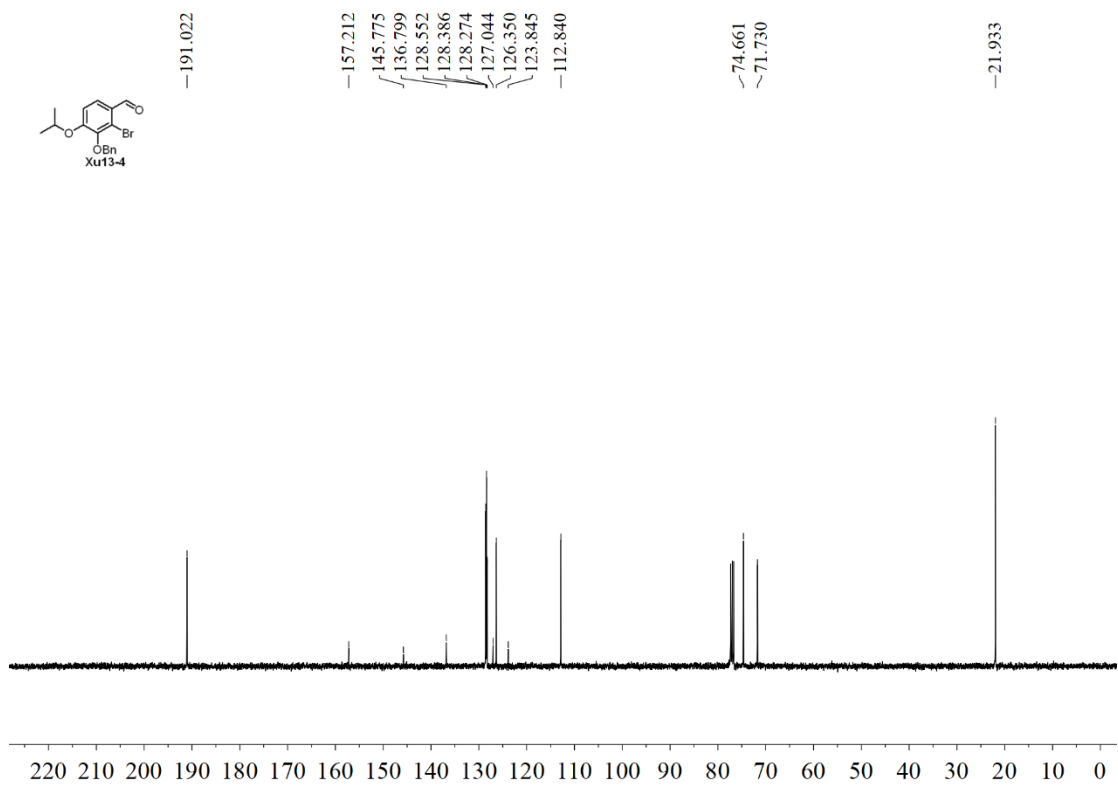

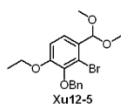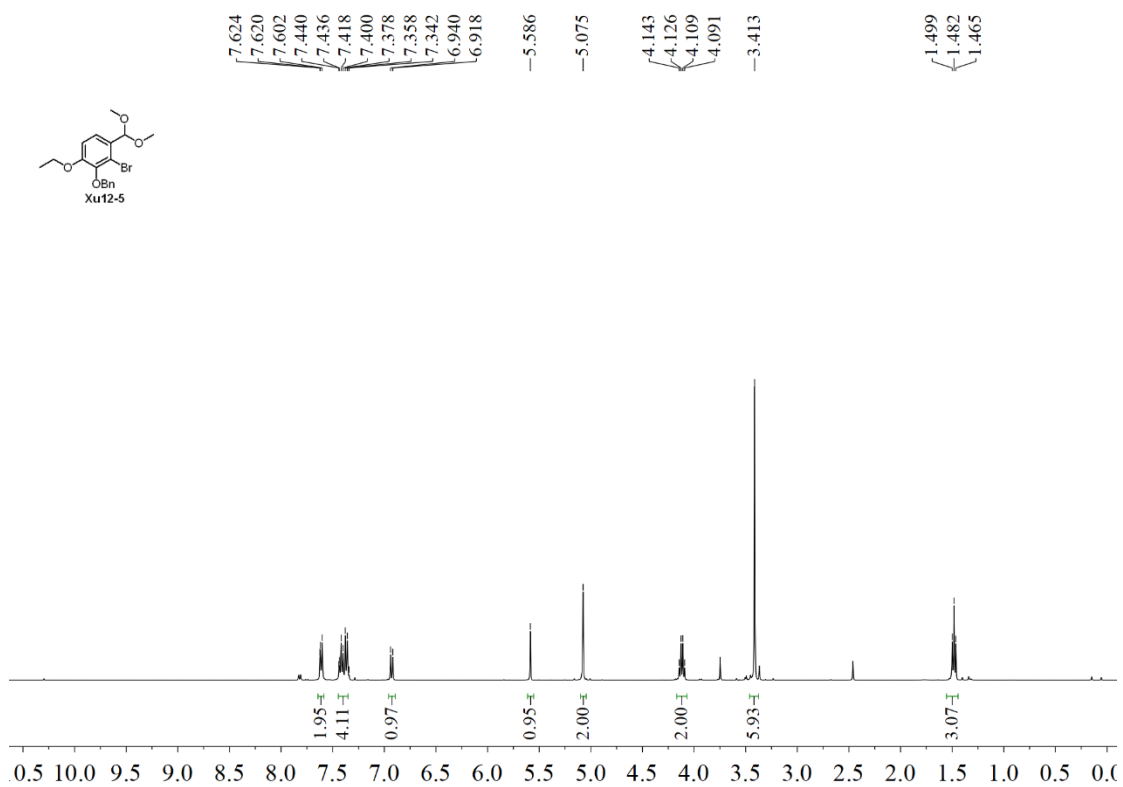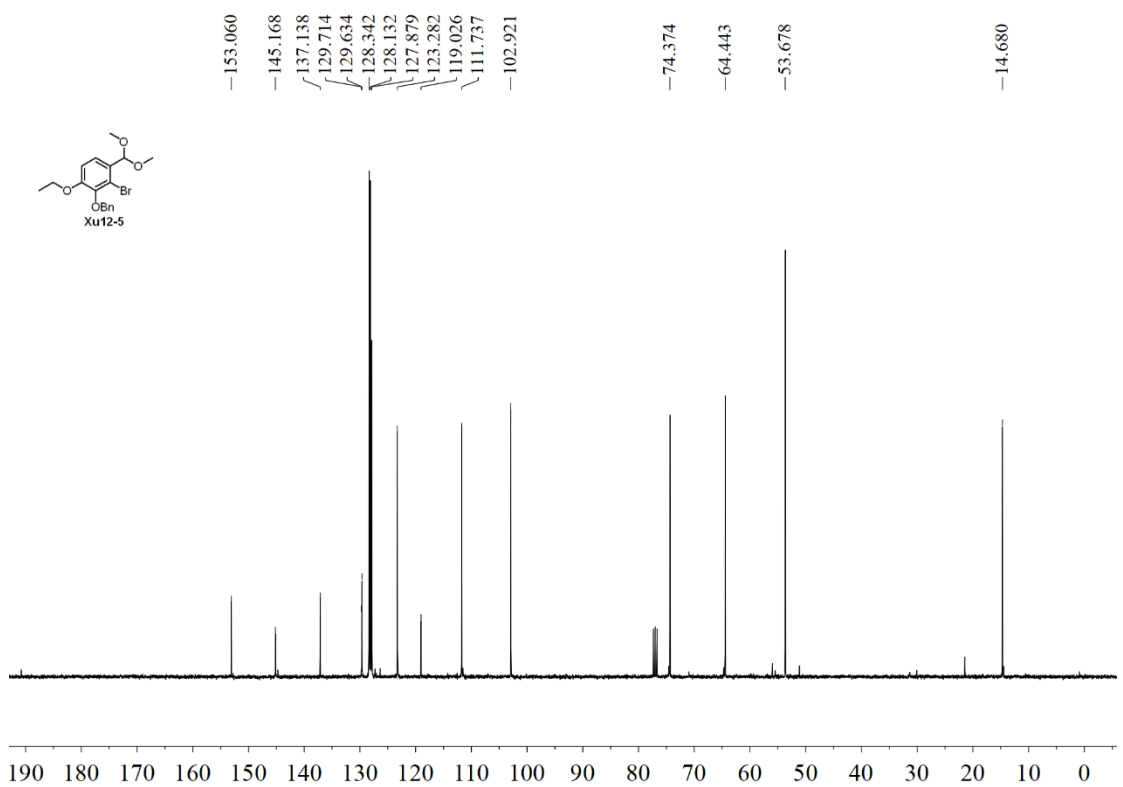

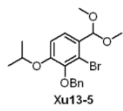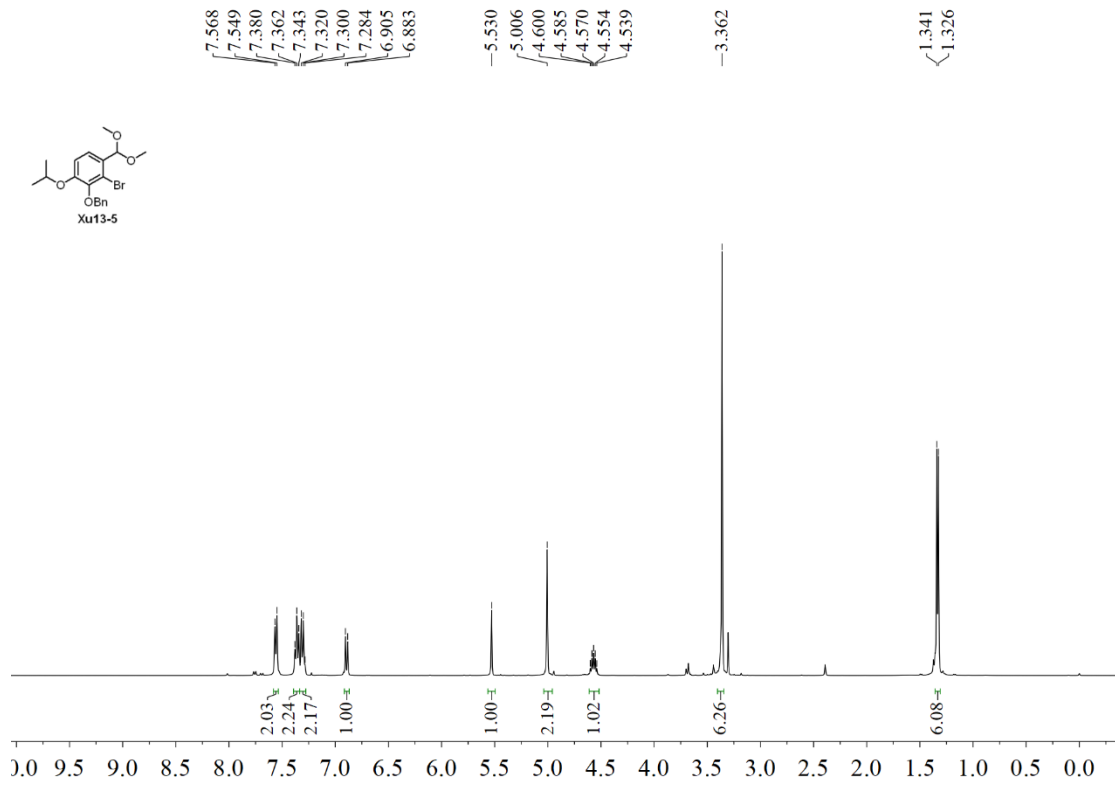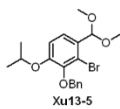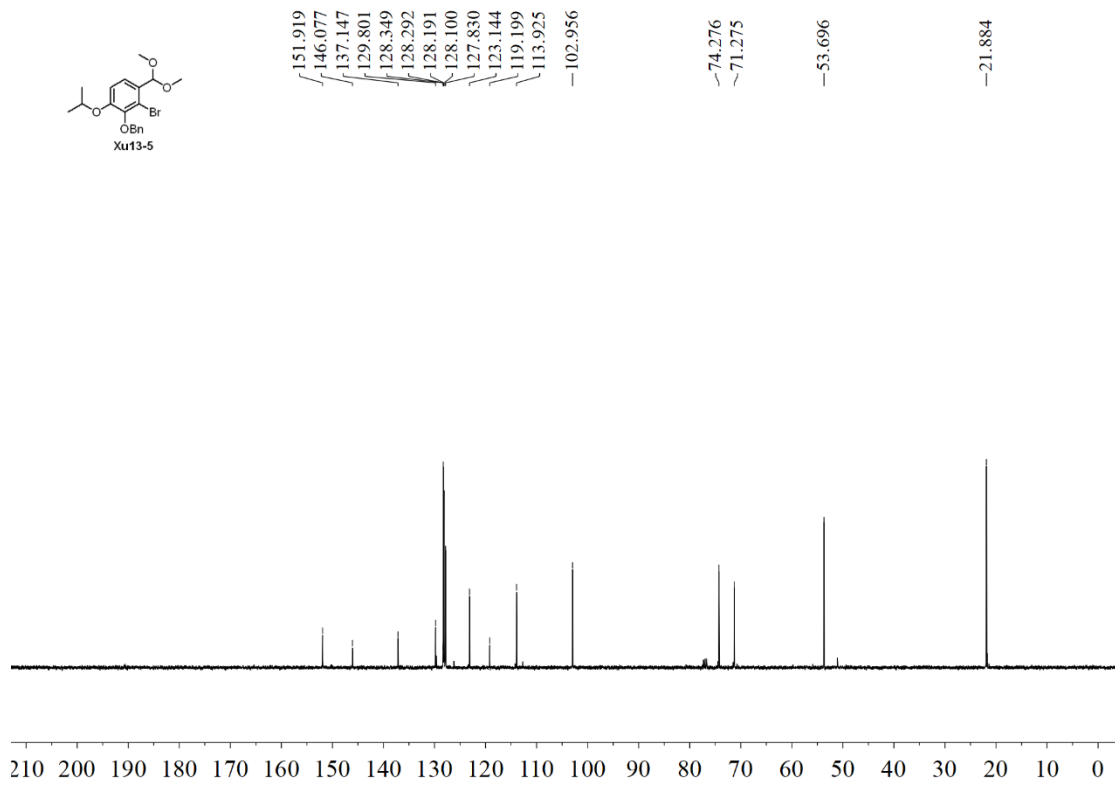

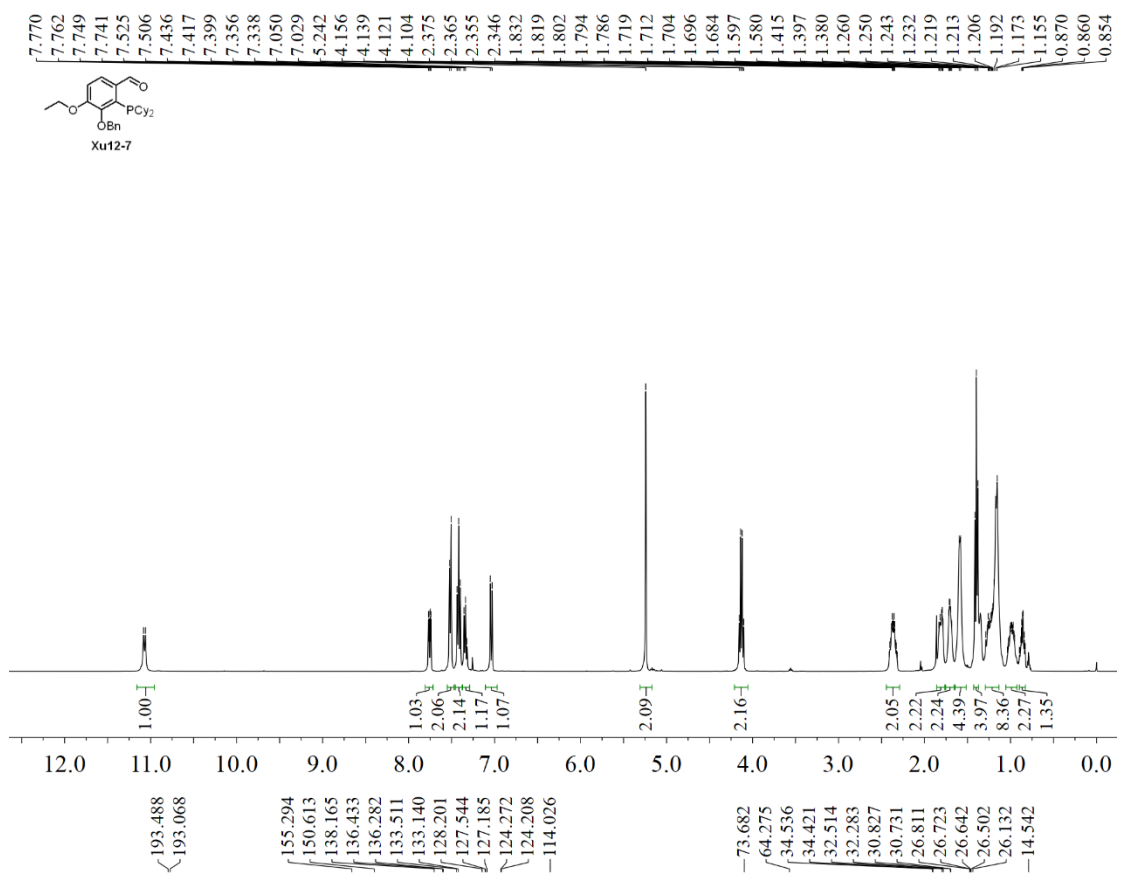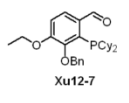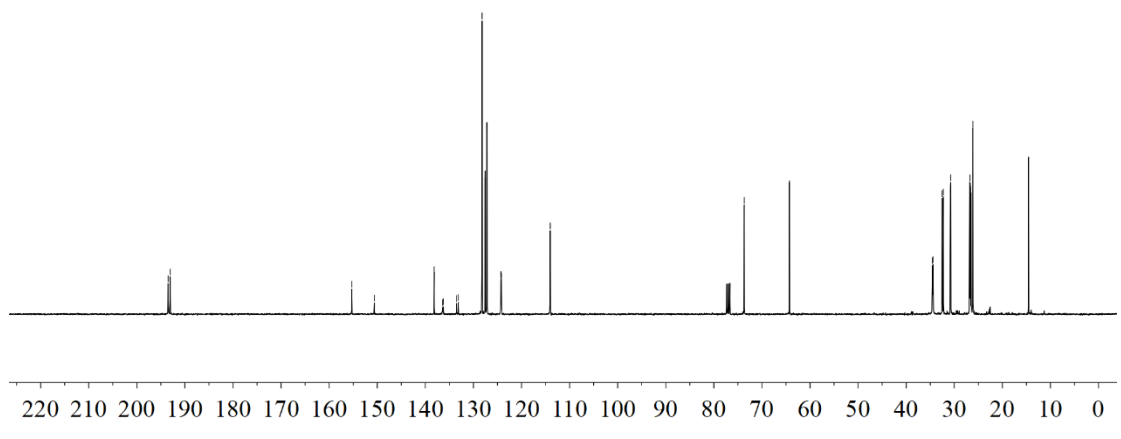

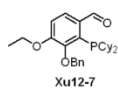

—13.992

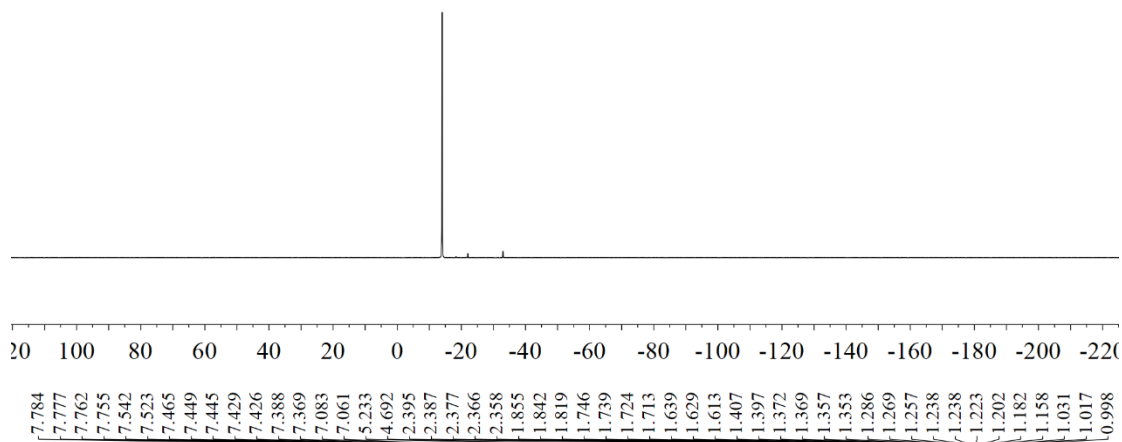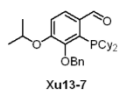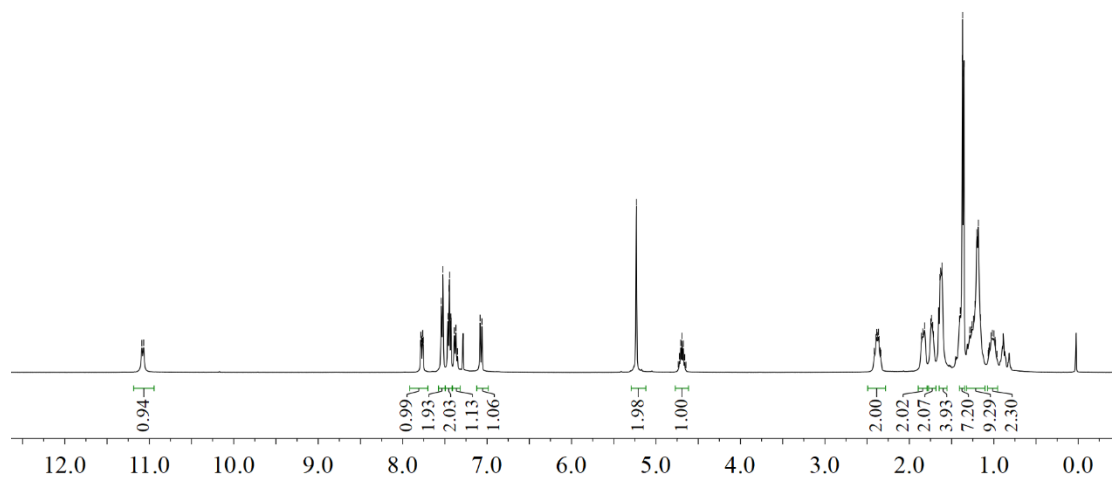

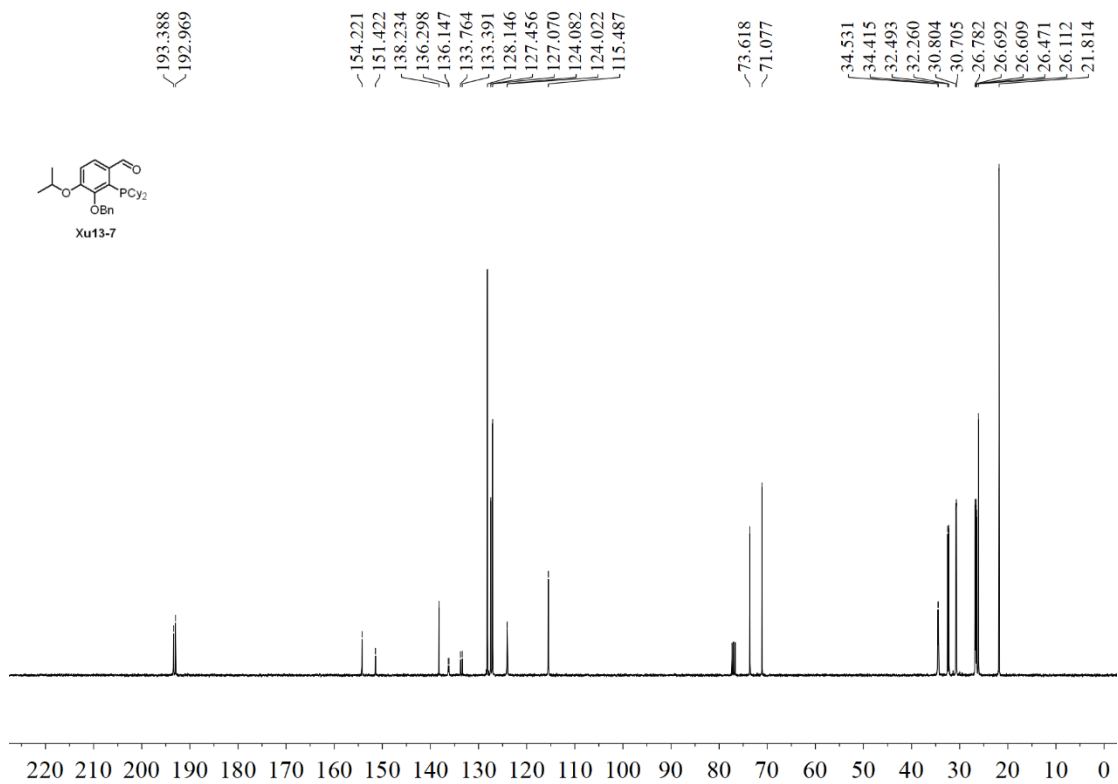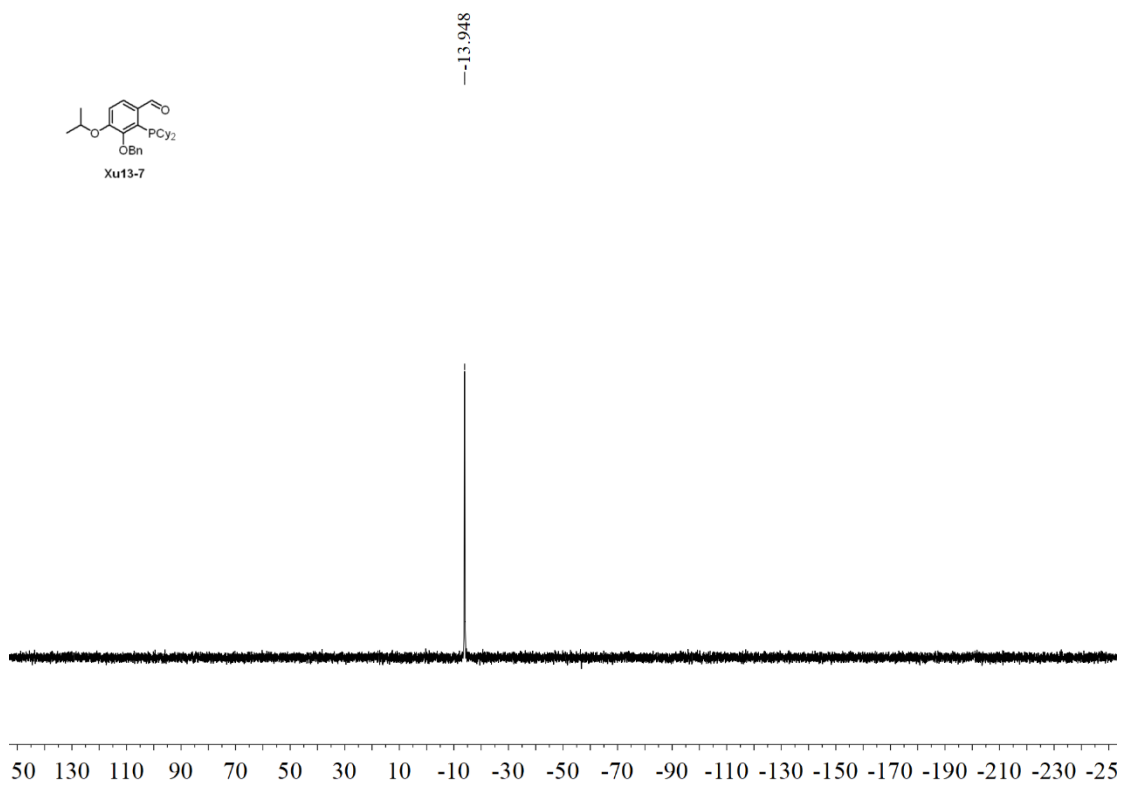



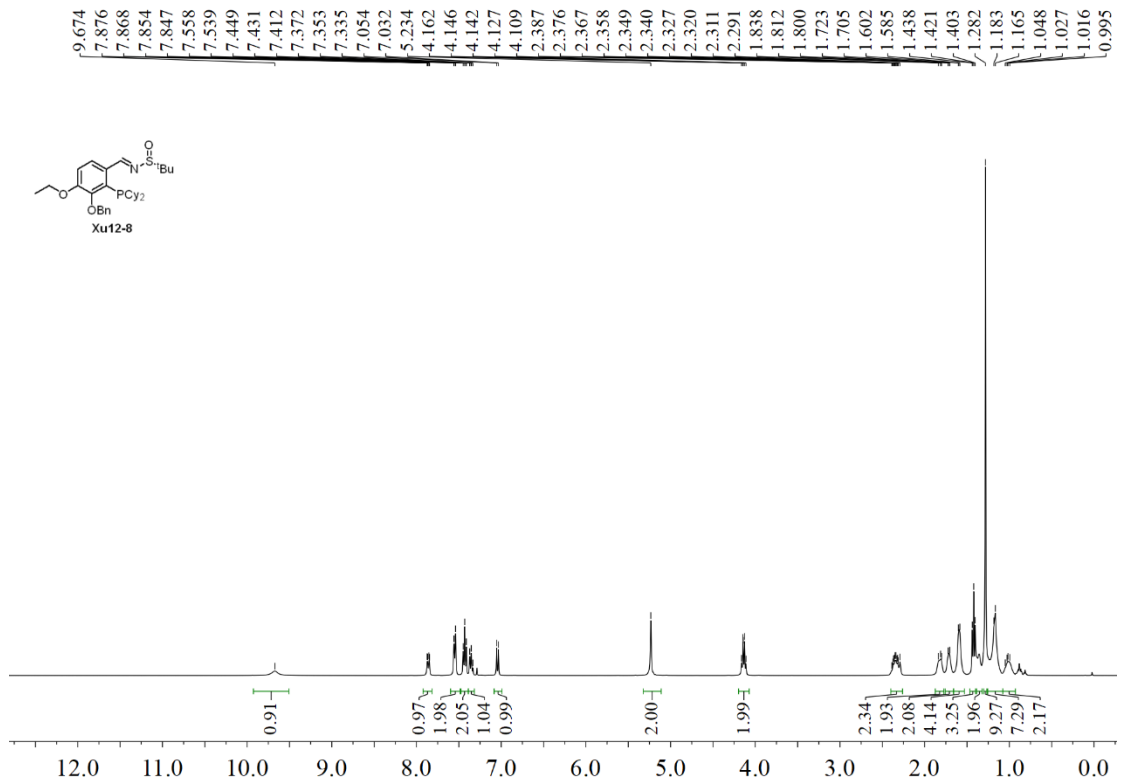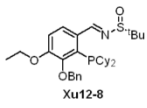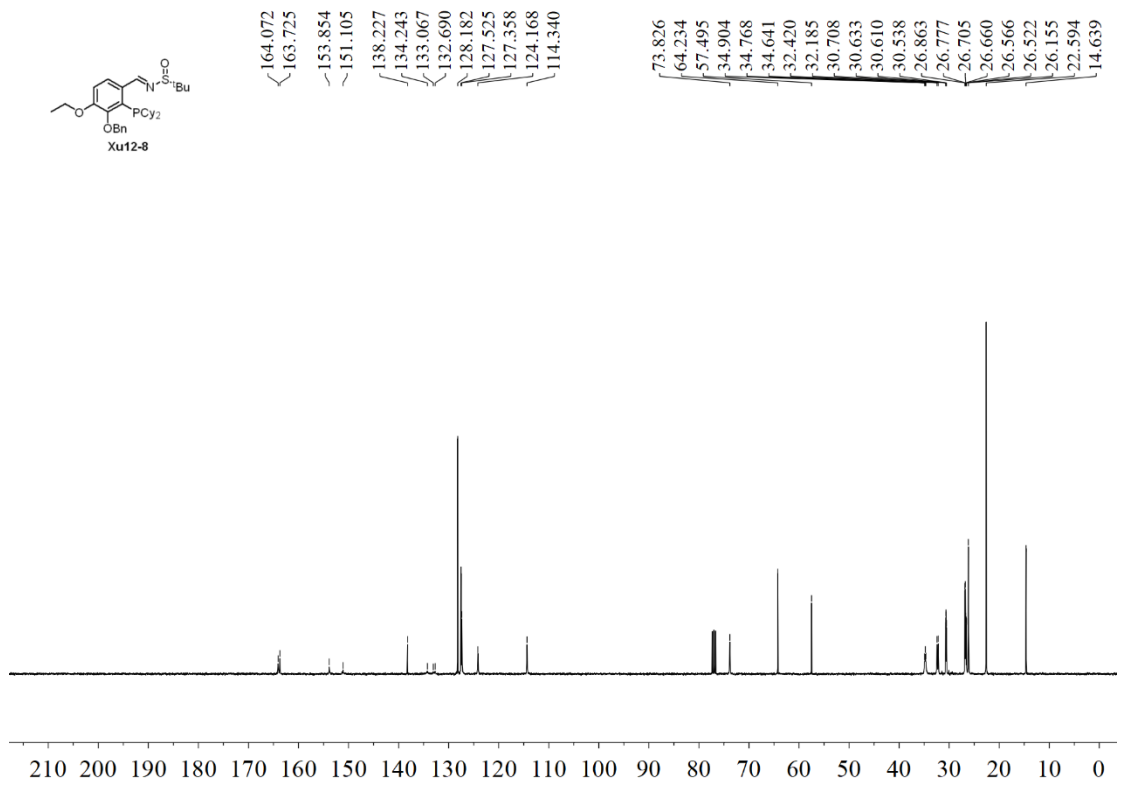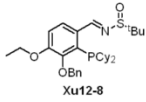

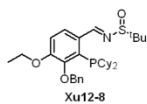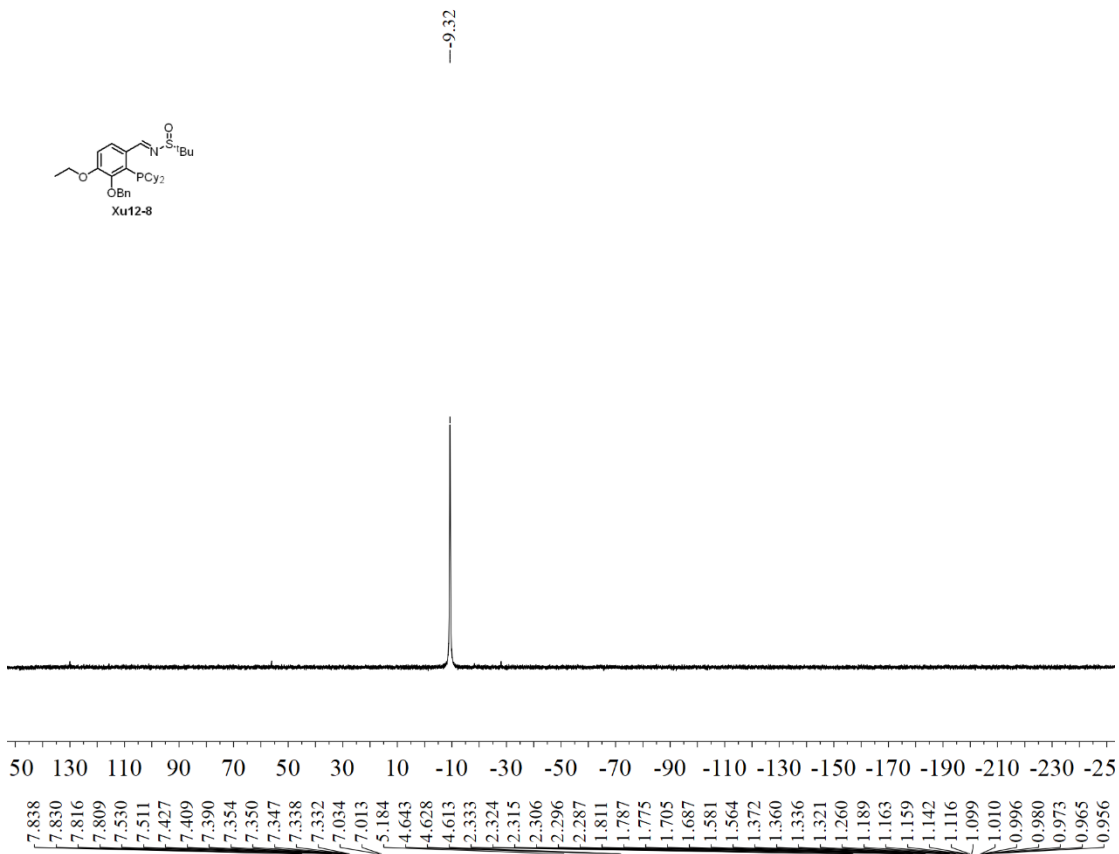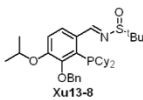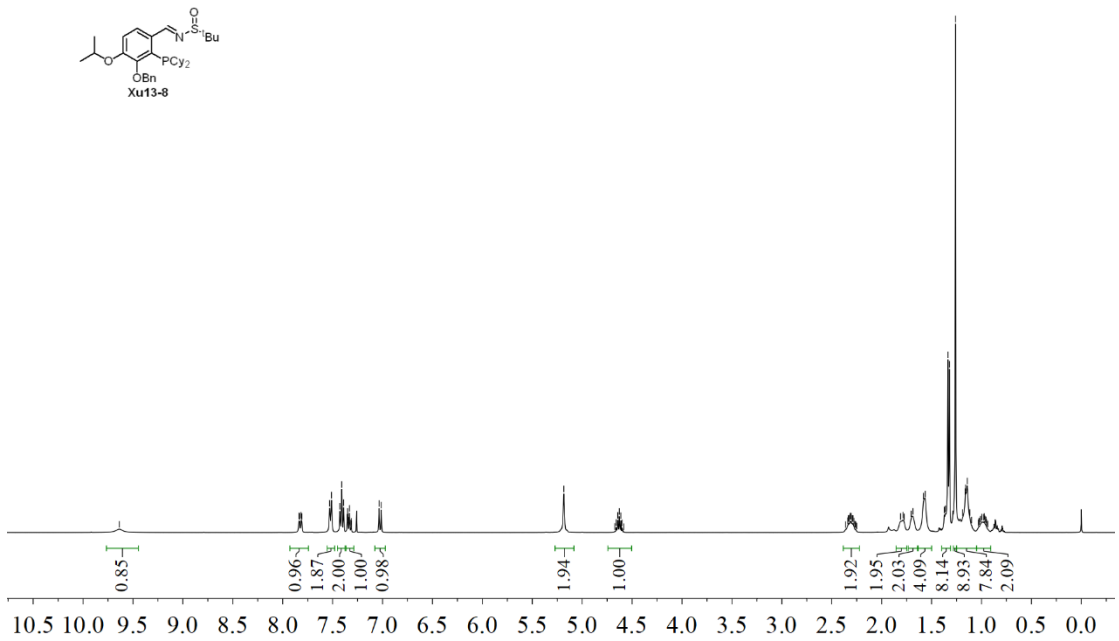

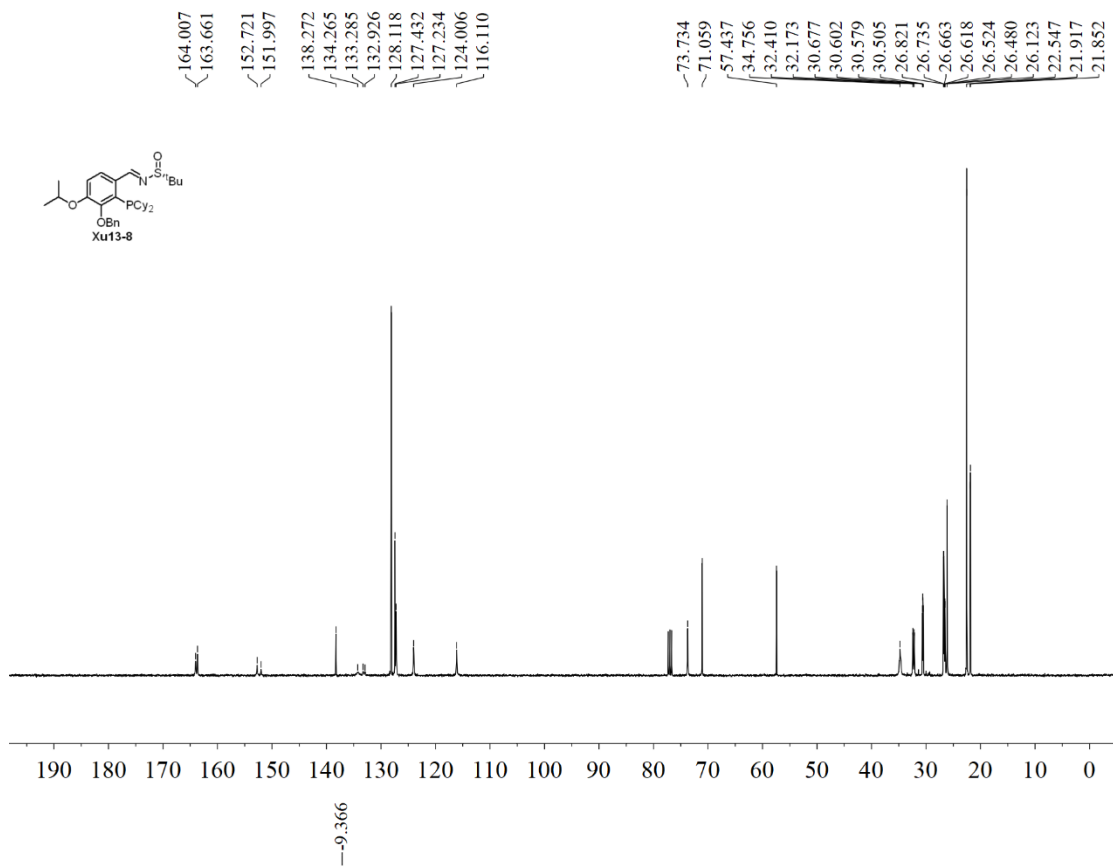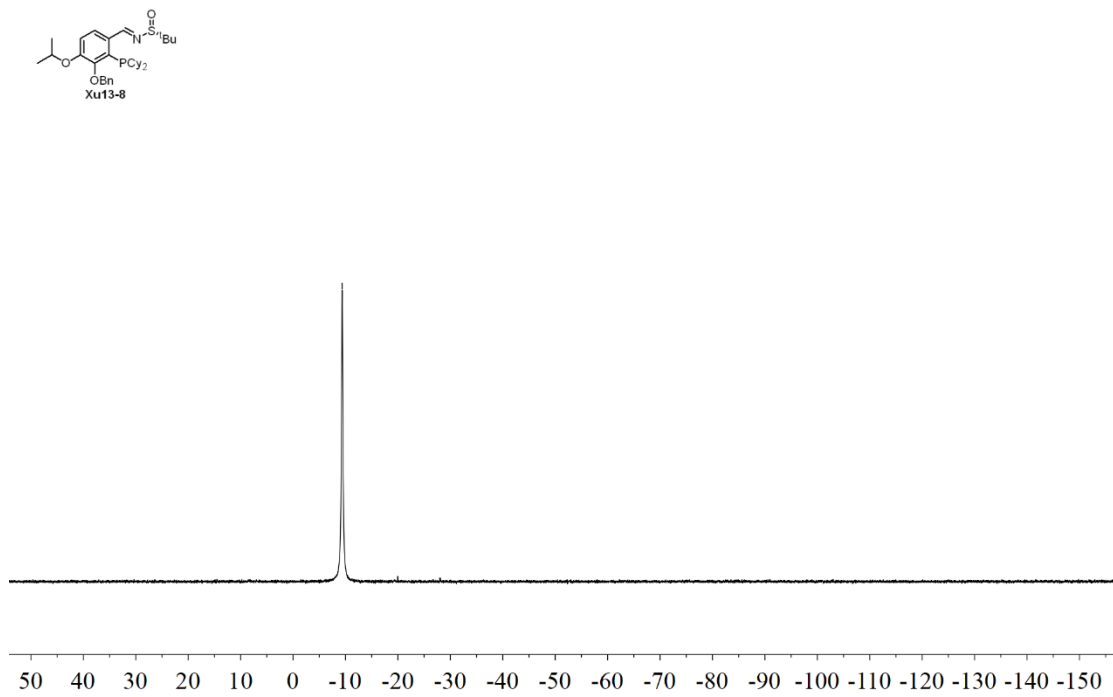

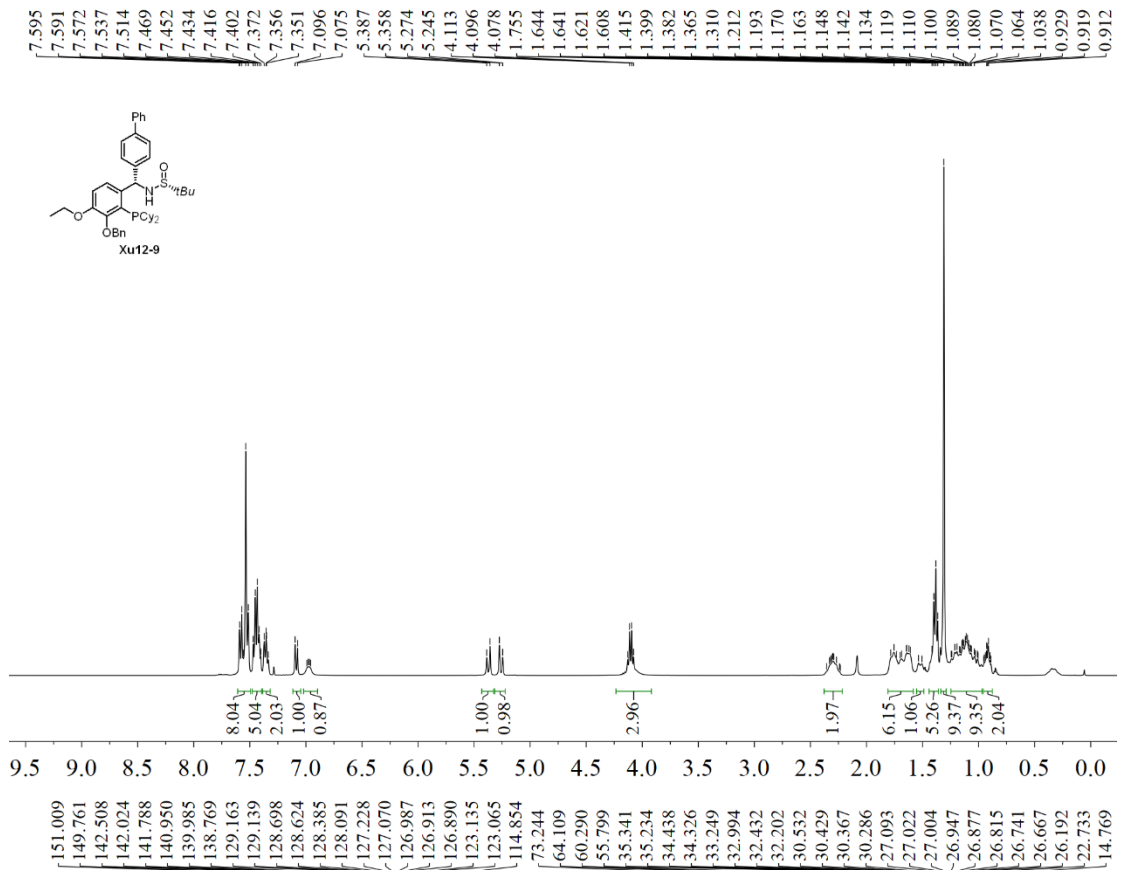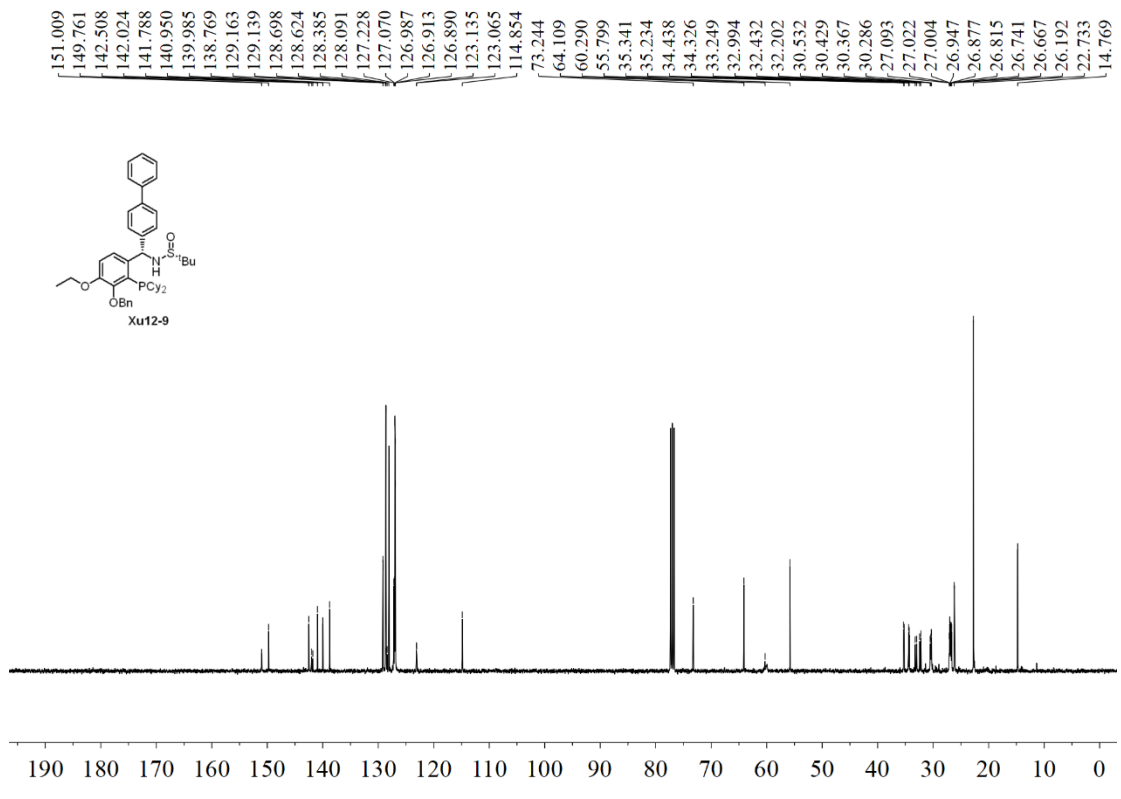

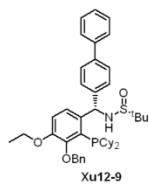

--6.67

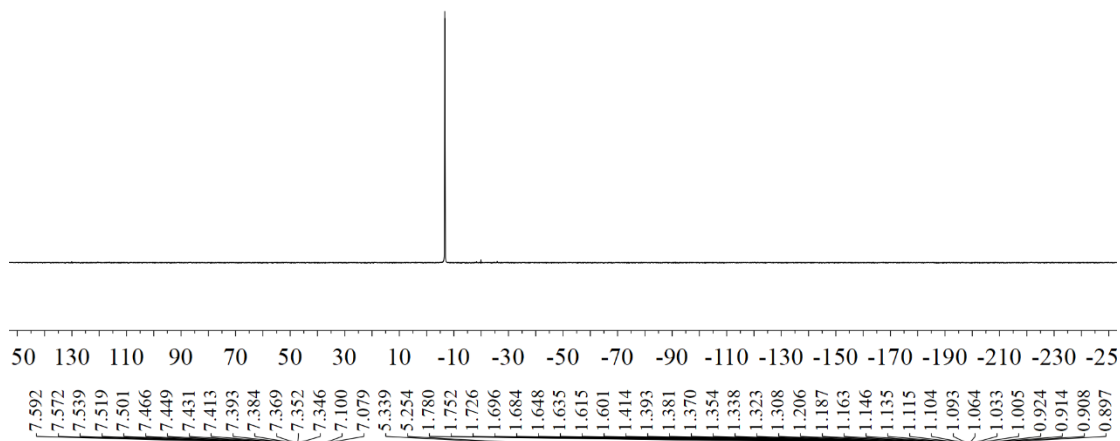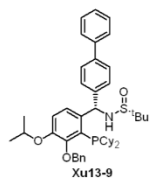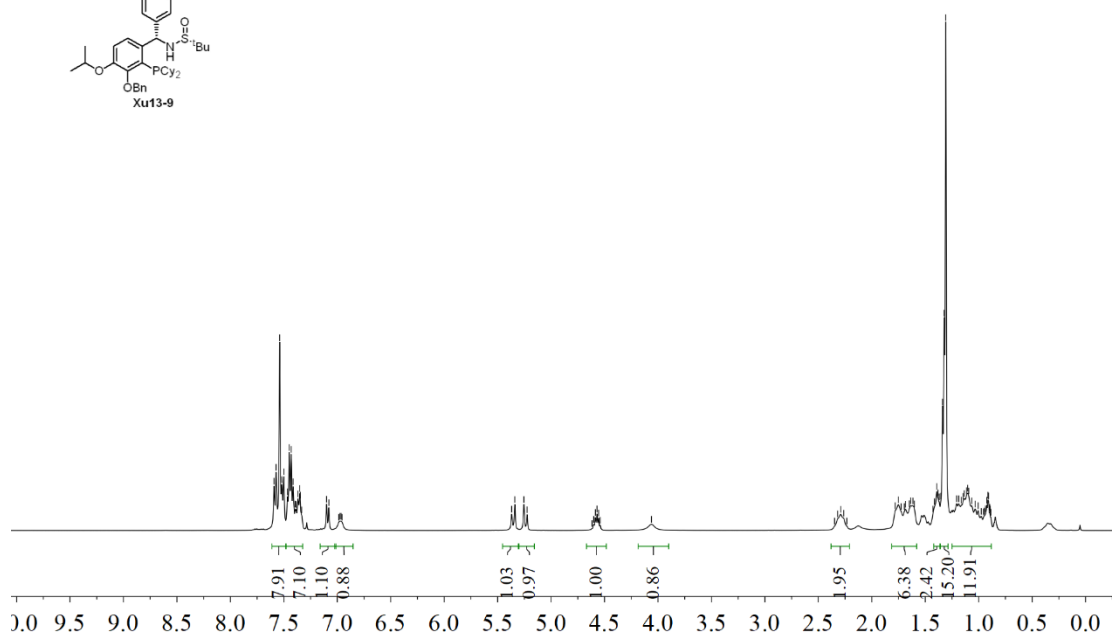

152.170  
148.567  
142.530  
142.299  
142.064  
140.957  
139.977  
138.855  
129.156  
129.134  
128.629  
128.087  
127.178  
127.072  
126.992  
126.921  
126.800  
123.140  
123.069  
117.291  
73.214  
71.249  
60.327  
59.975  
55.821  
55.385  
55.280  
54.519  
54.406  
53.259  
53.001  
52.451  
52.223  
50.546  
50.444  
50.393  
50.315  
27.101  
27.035  
27.007  
26.957  
26.885  
26.827  
26.752  
26.681  
26.193  
22.745  
22.102  
22.047

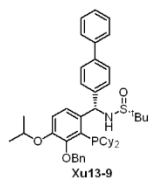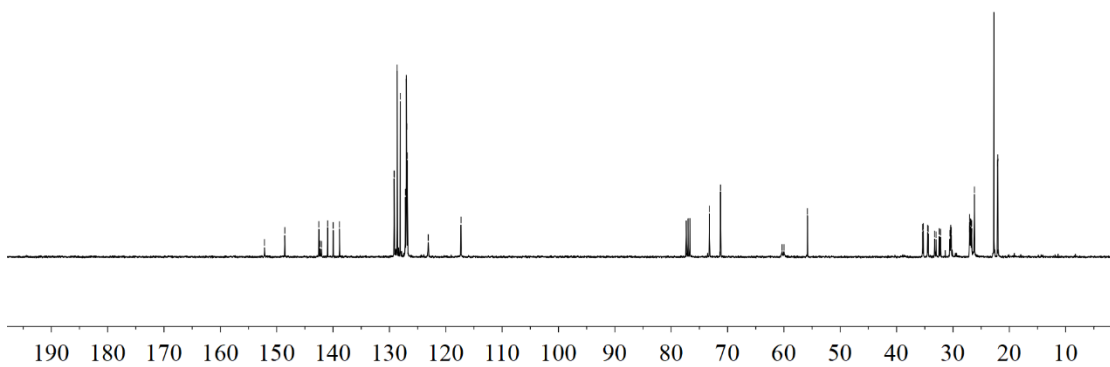

-6.782

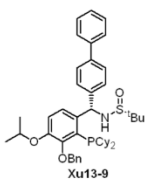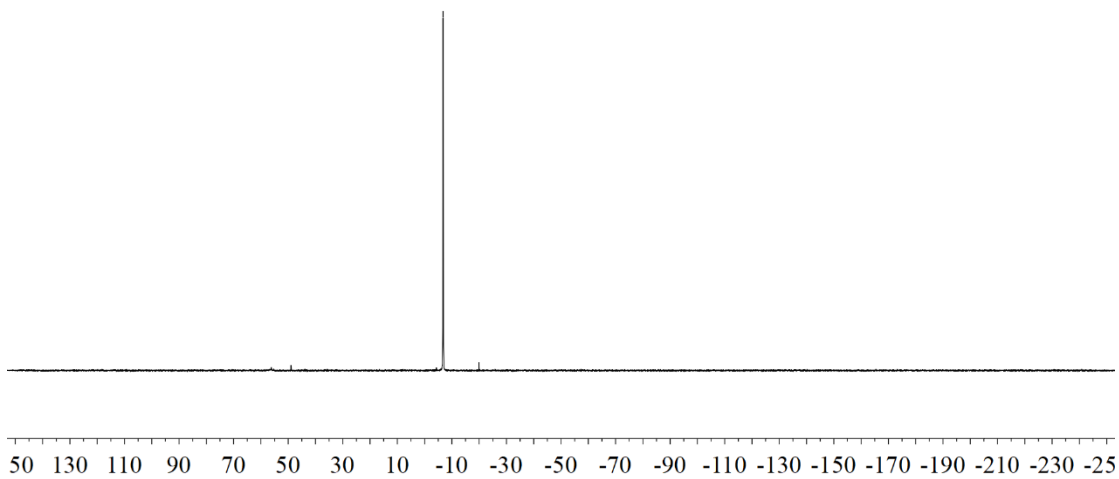

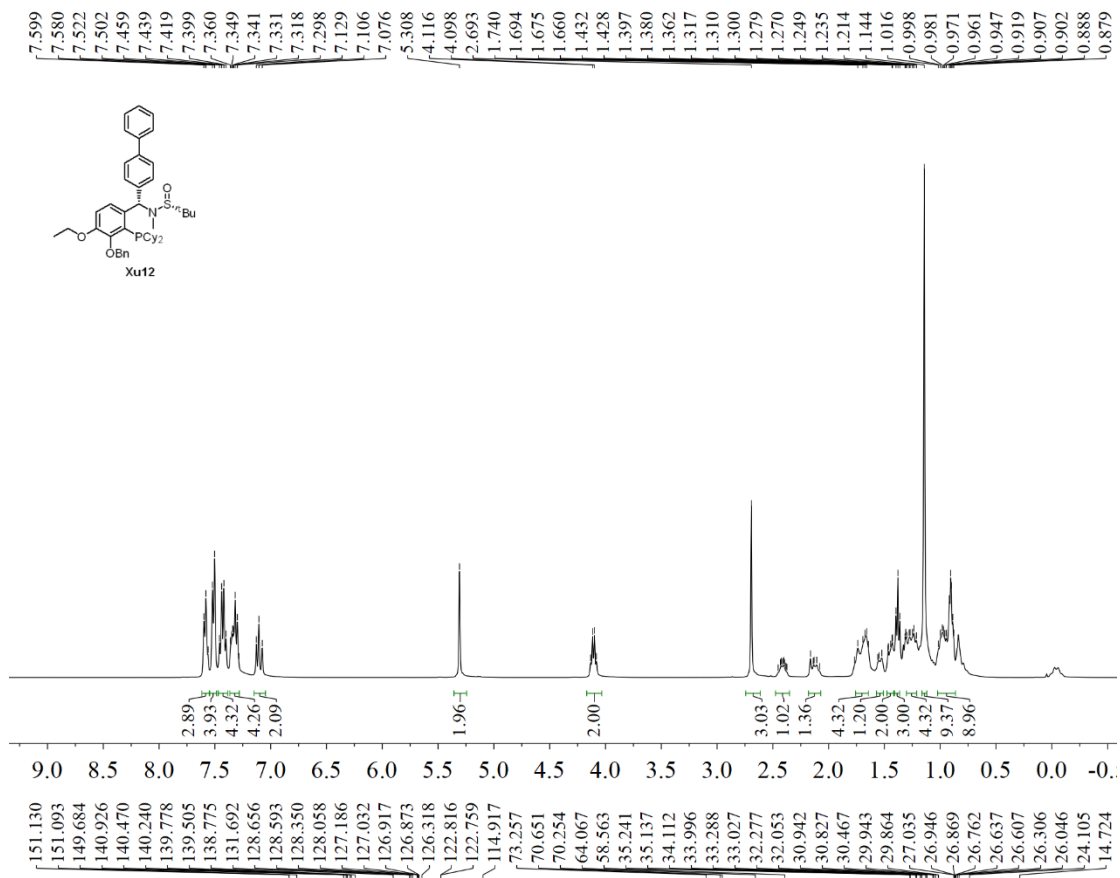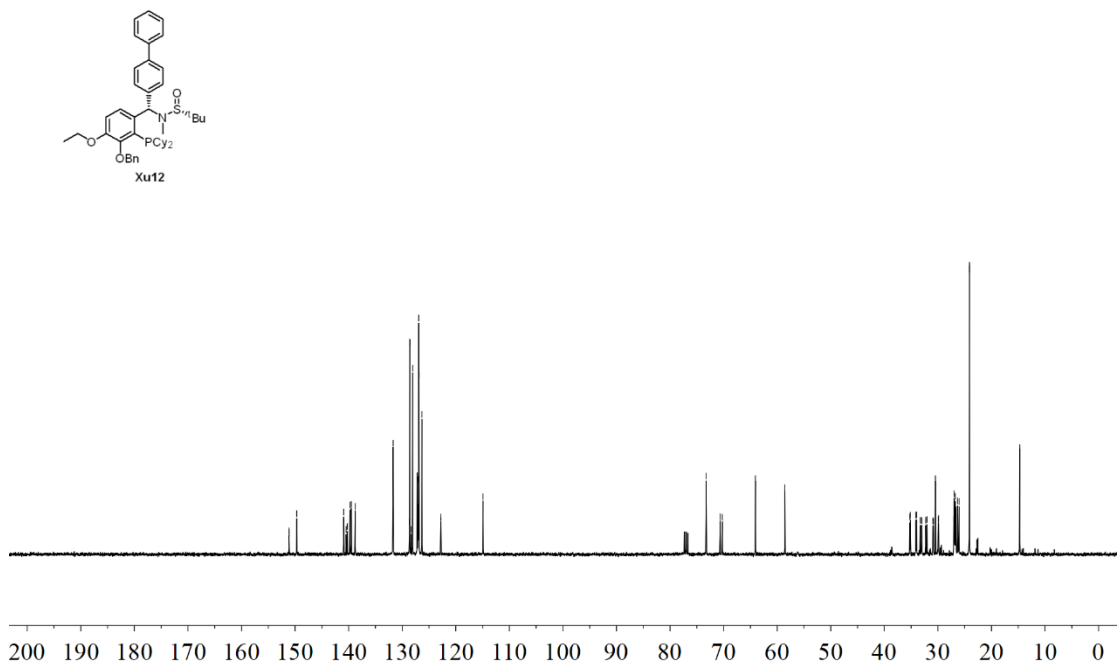

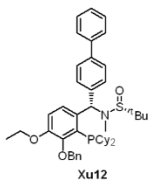

--6.10

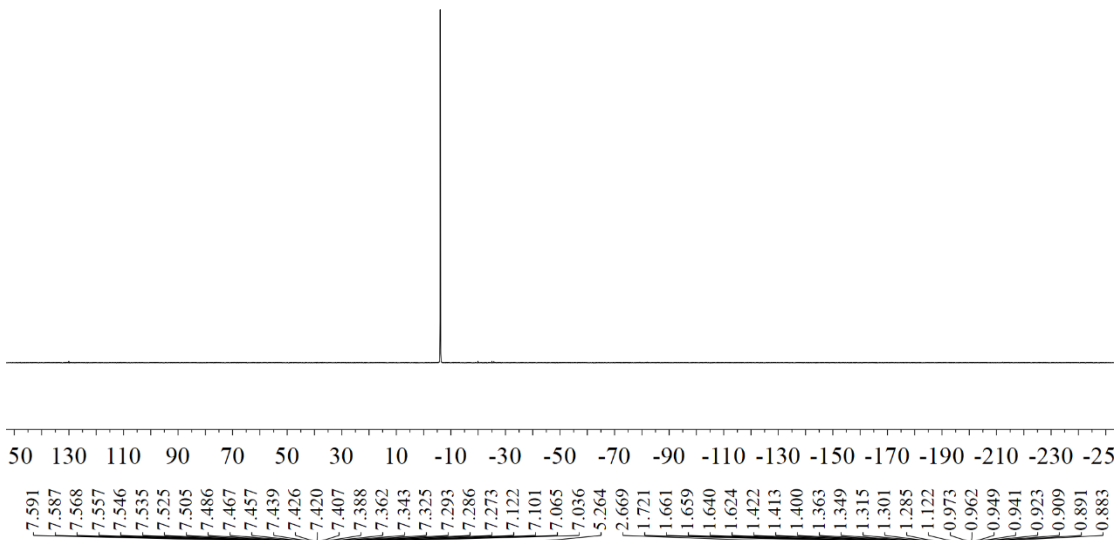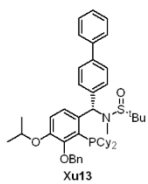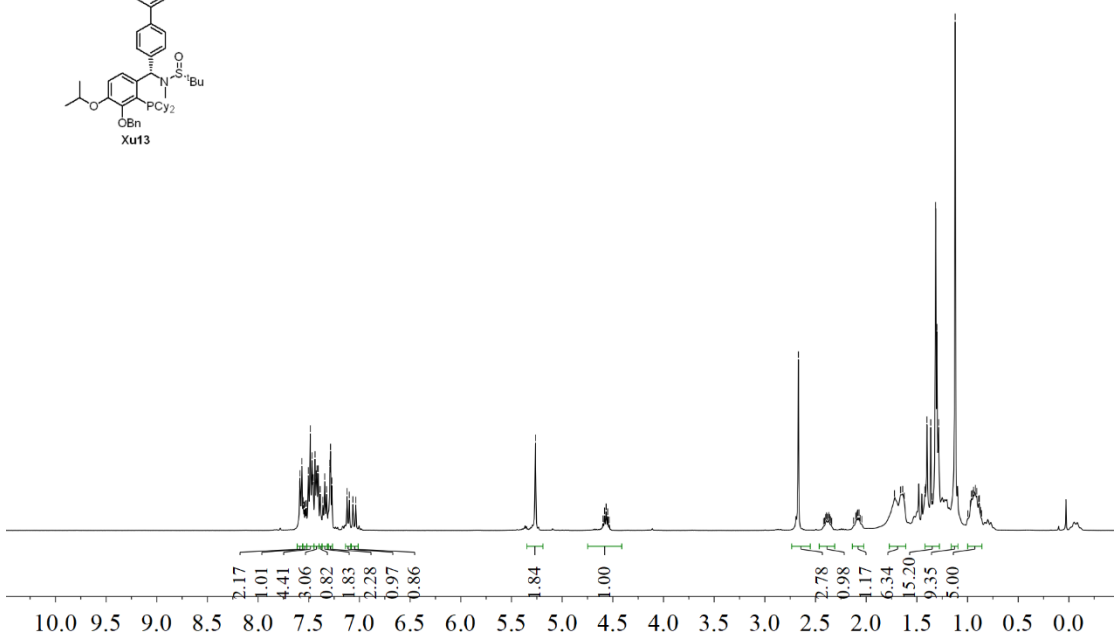



148.517  
 141.028  
 139.825  
 139.559  
 138.928  
 131.765  
 128.681  
 128.133  
 127.208  
 127.110  
 127.031  
 127.019  
 126.862  
 126.399  
 122.910  
 122.853  
 117.698  
 73.287  
 71.352  
 70.731  
 70.331  
 58.680  
 35.355  
 35.253  
 34.243  
 34.128  
 33.354  
 33.093  
 32.372  
 31.485  
 31.413  
 31.024  
 30.909  
 30.584  
 30.177  
 30.120  
 30.018  
 29.938  
 29.672  
 27.116  
 27.020  
 26.936  
 26.849  
 26.725  
 26.676  
 26.379  
 26.117  
 24.208  
 22.097  
 22.076

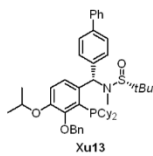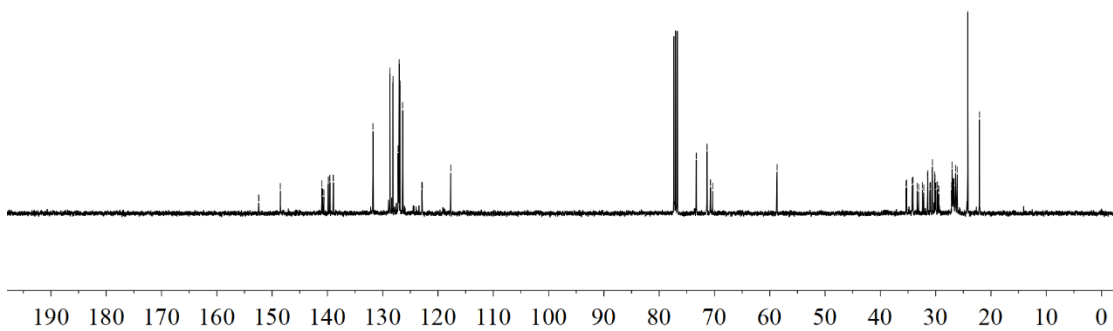

-6.250

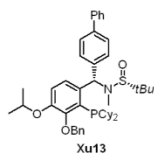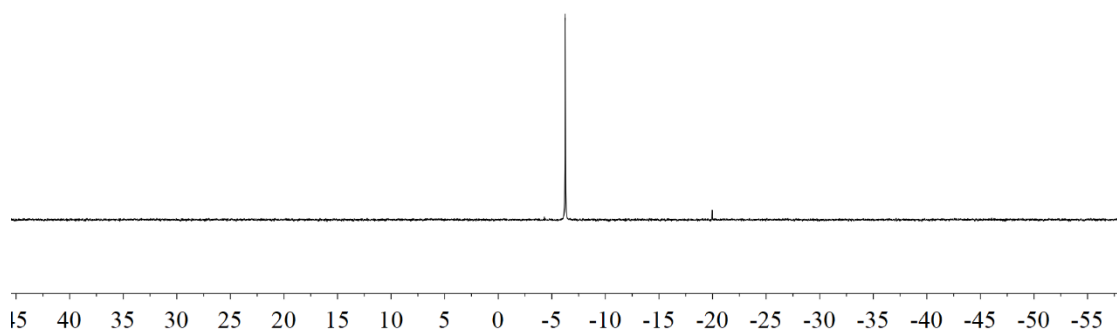

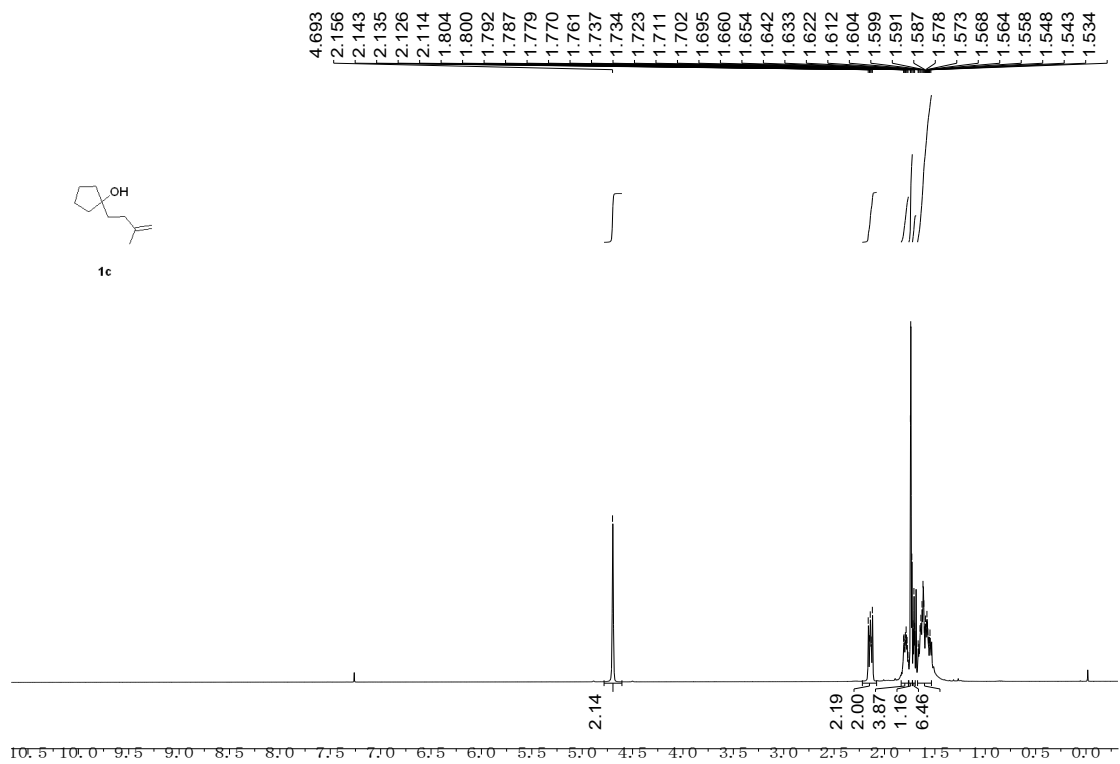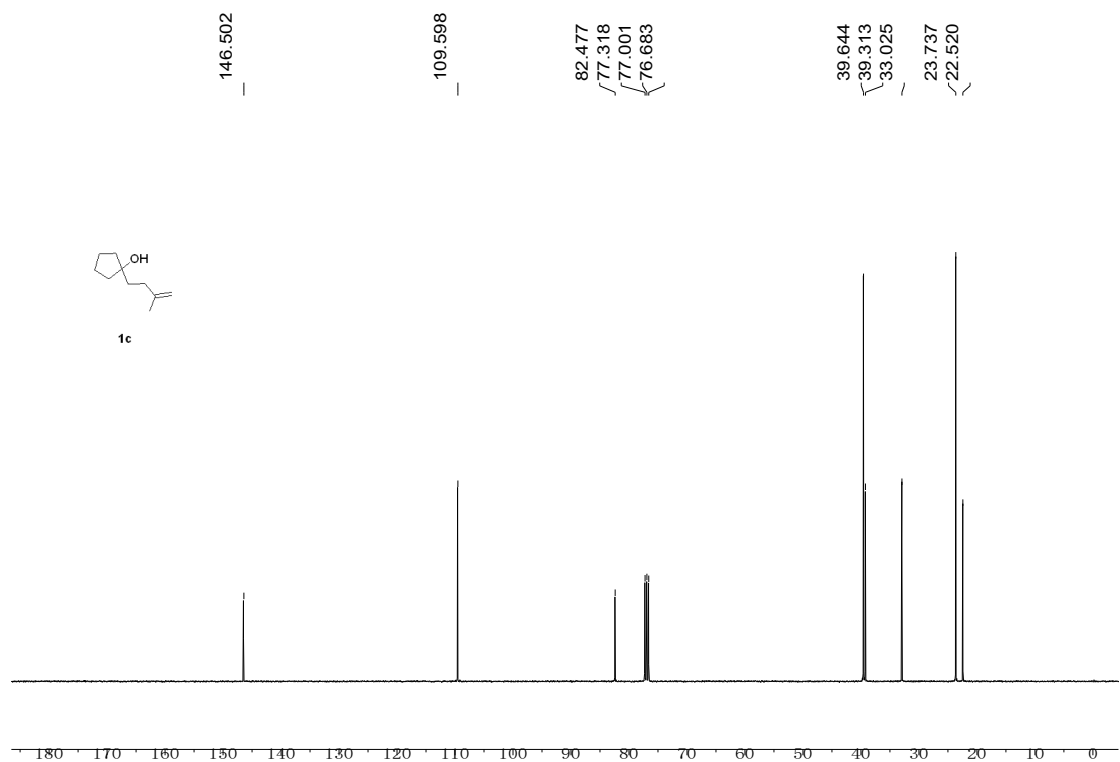

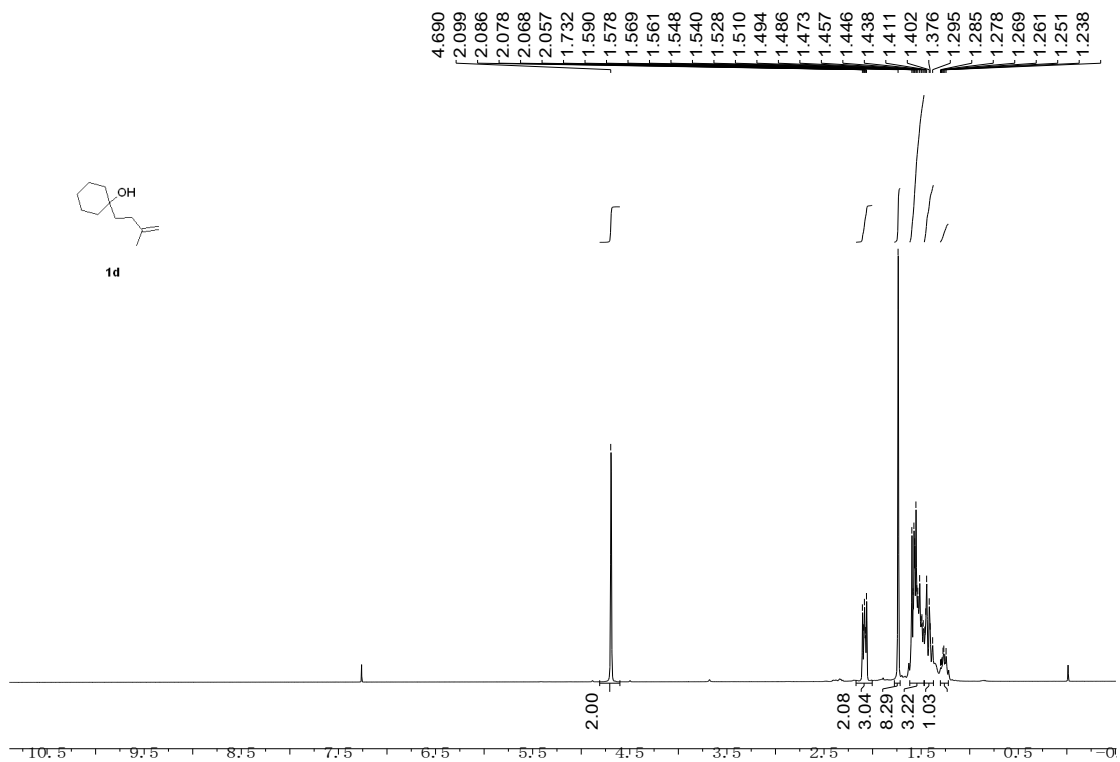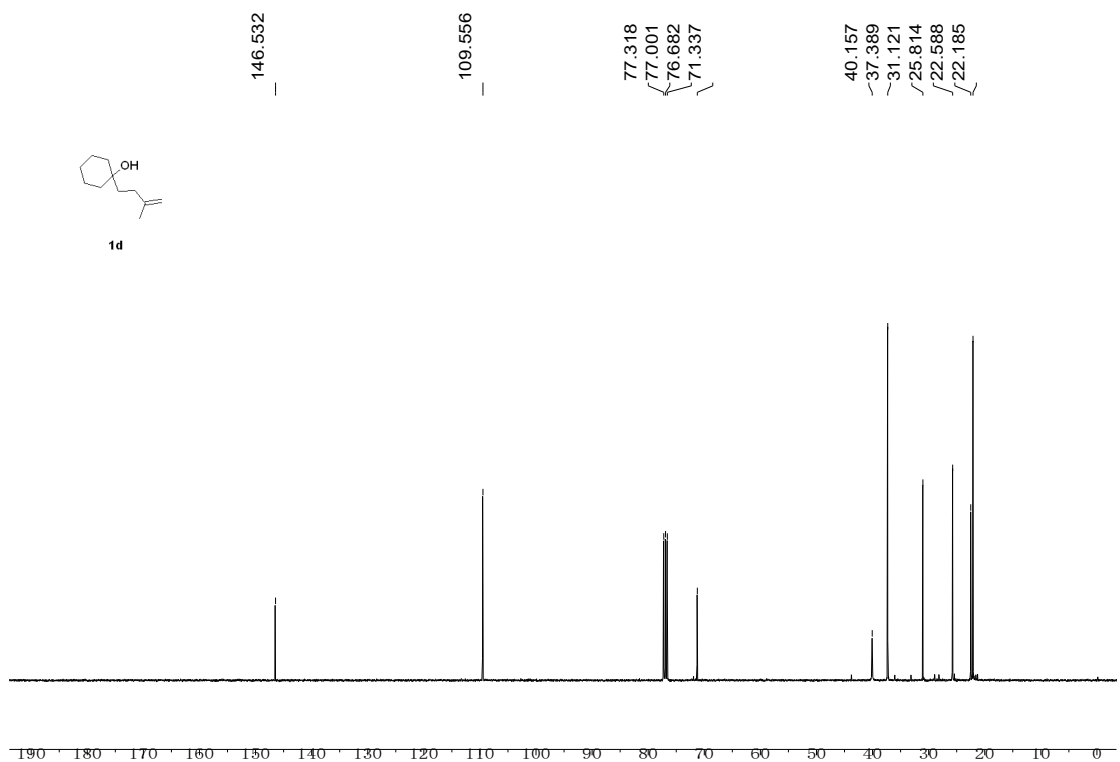

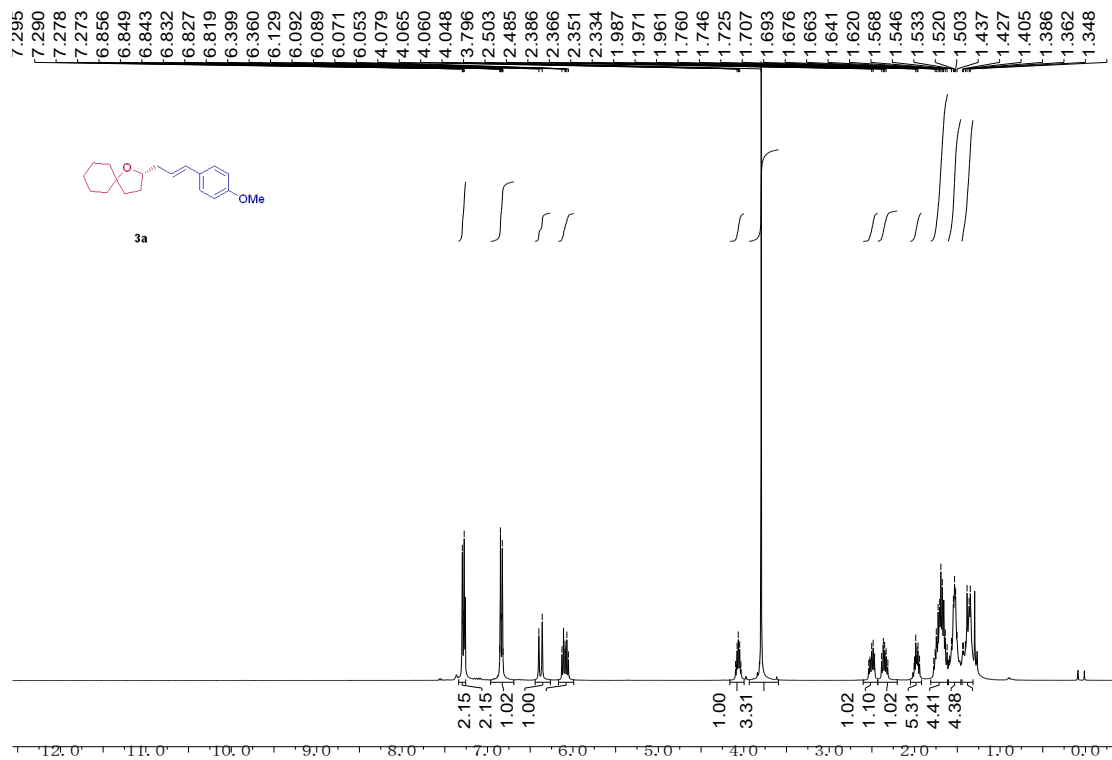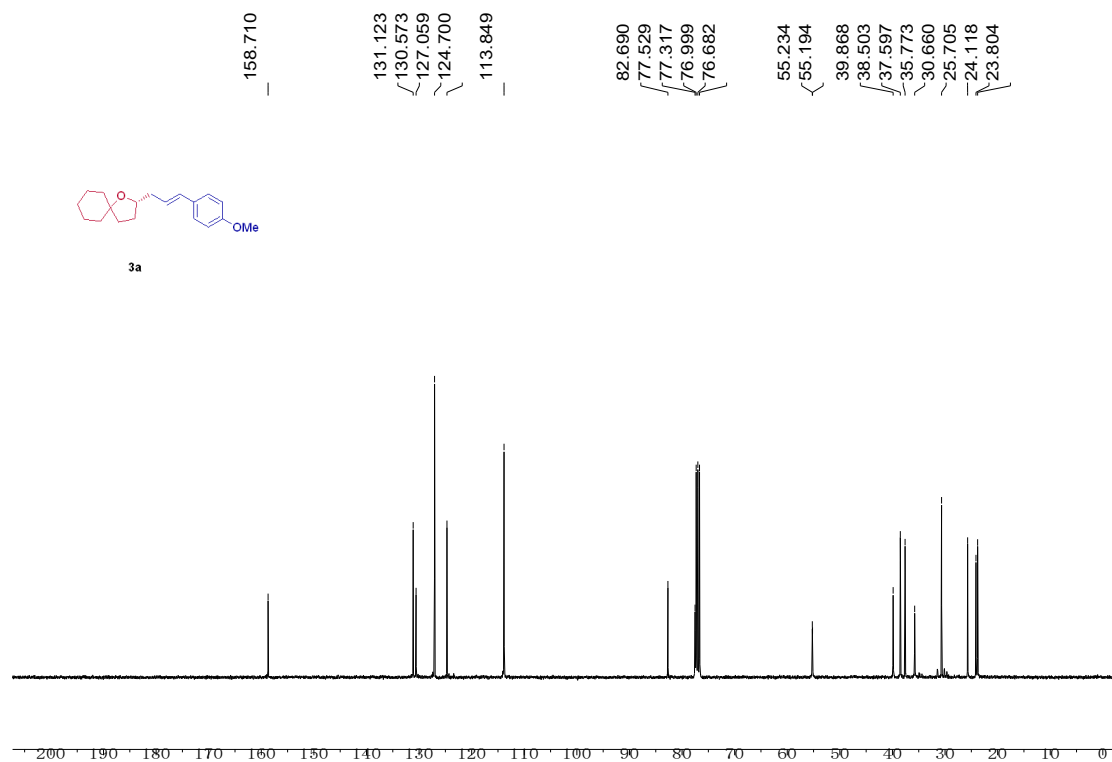

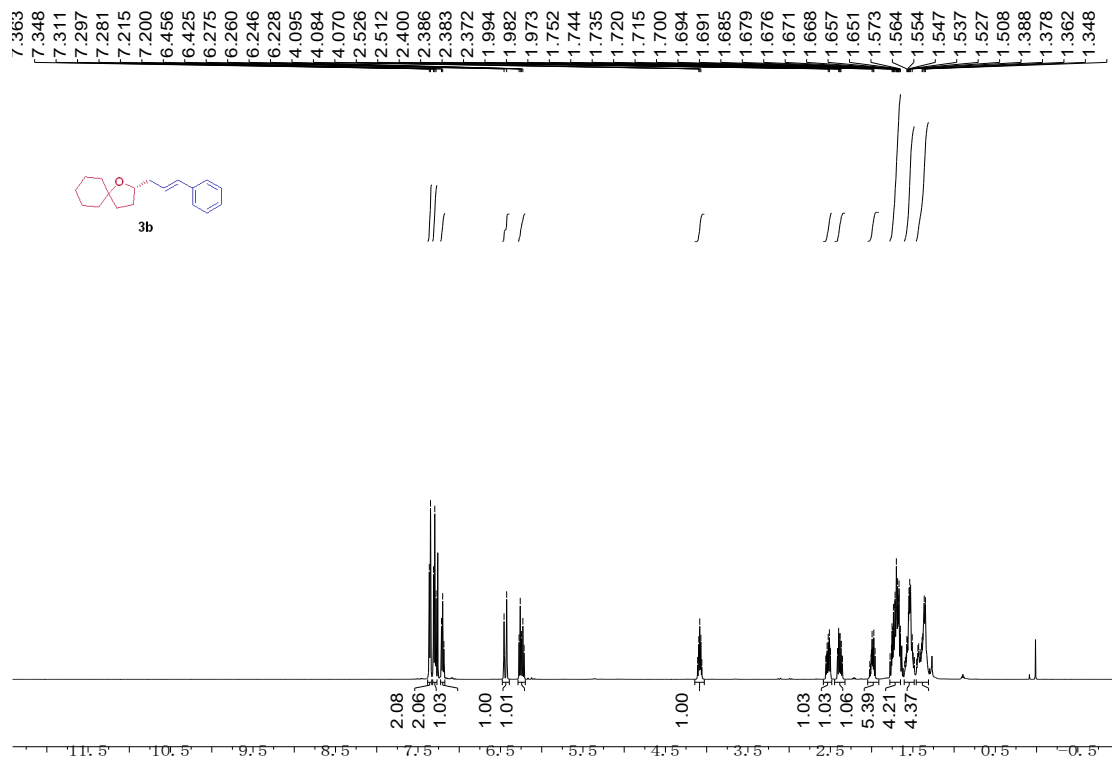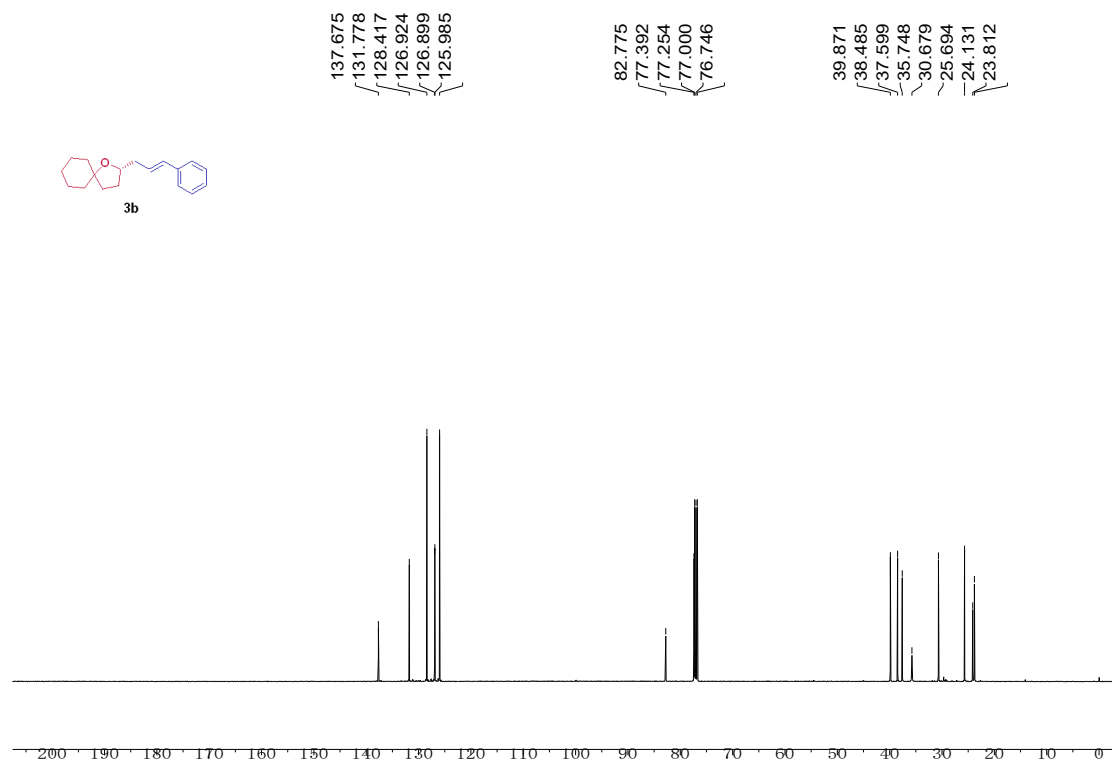

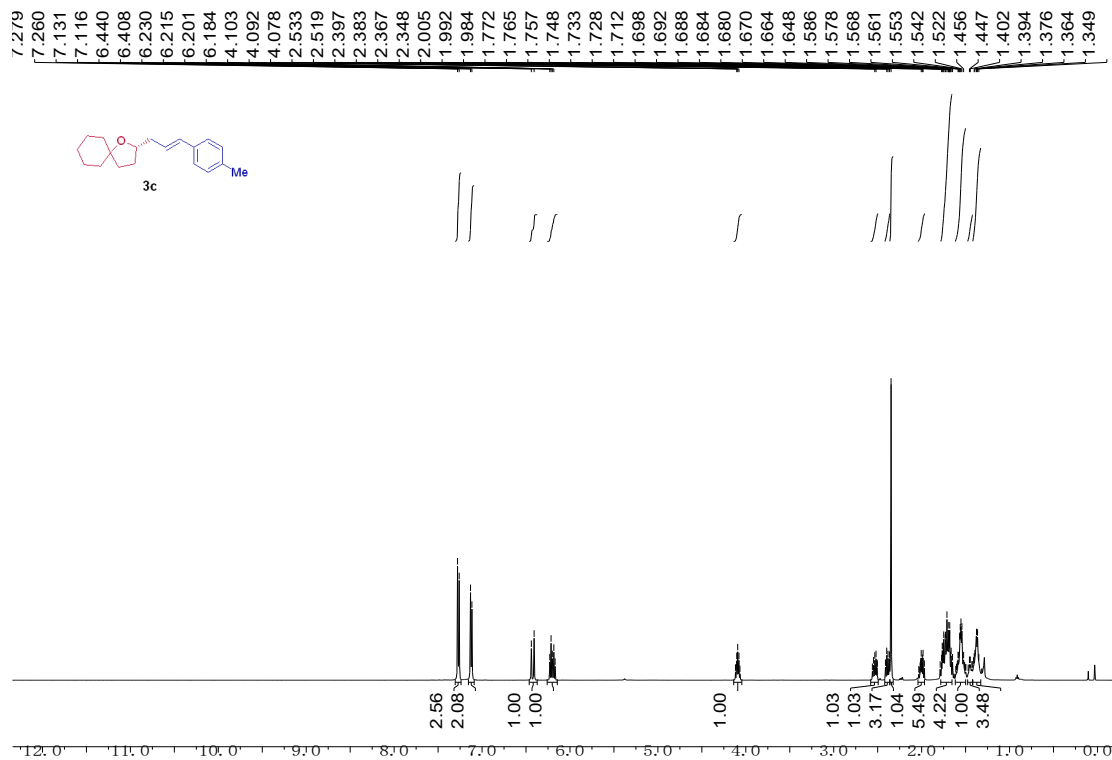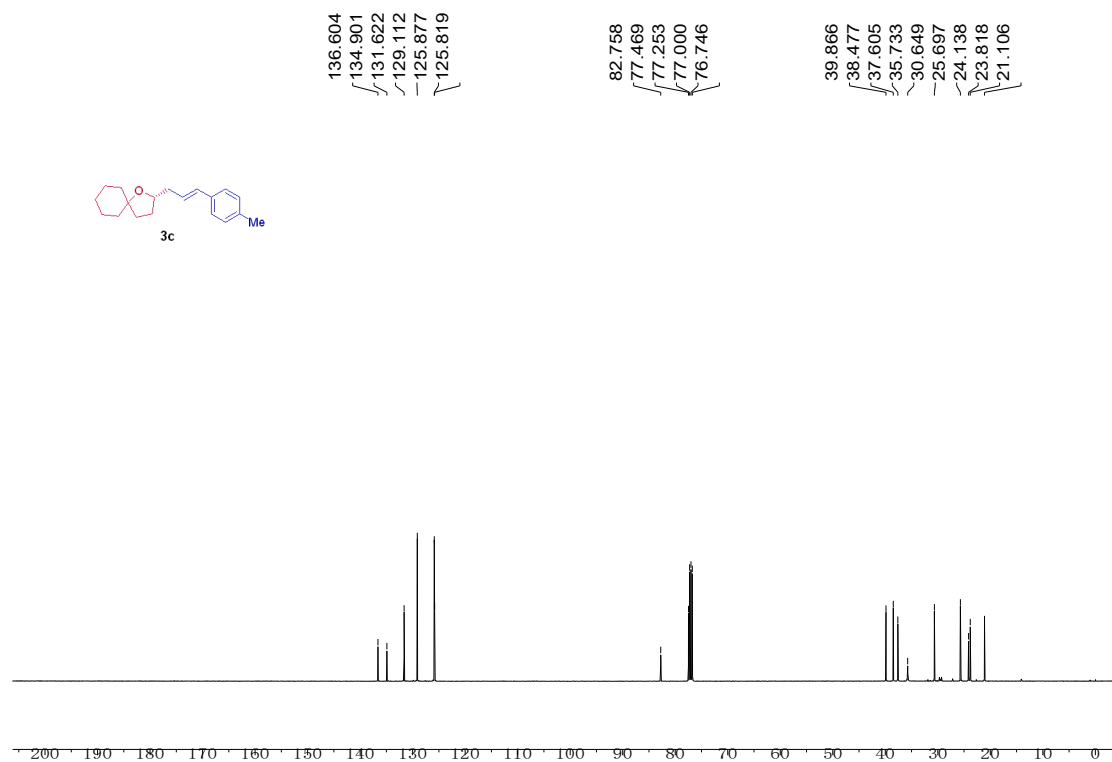

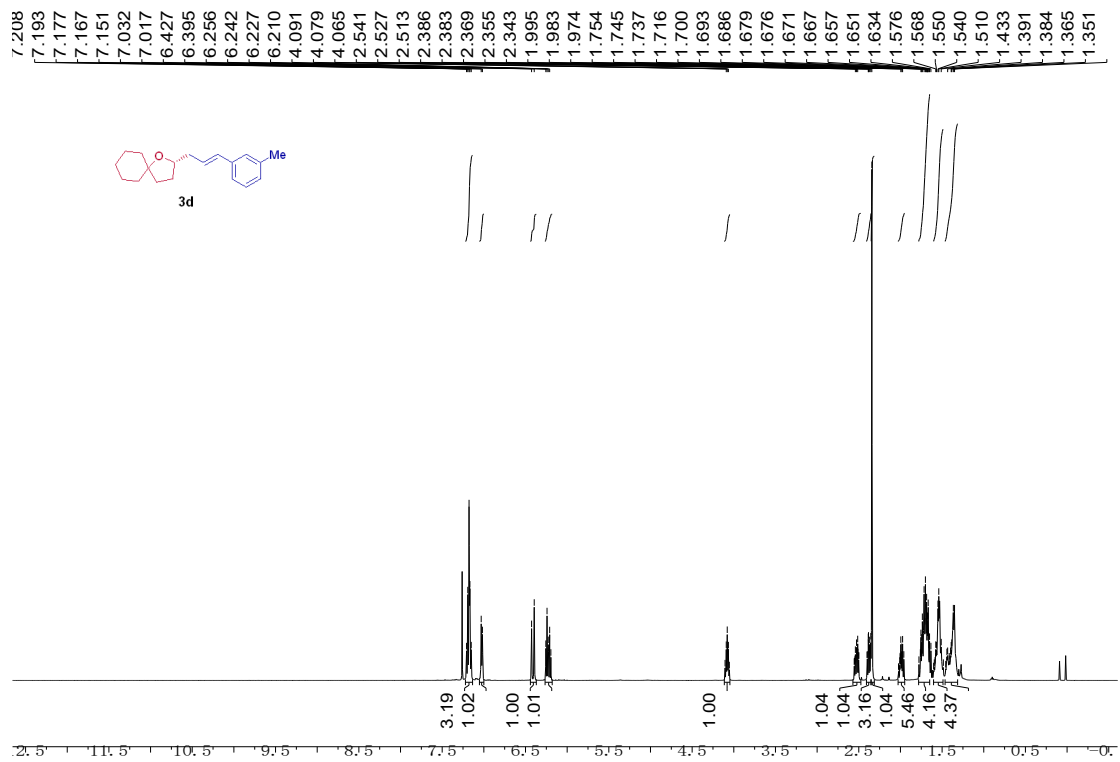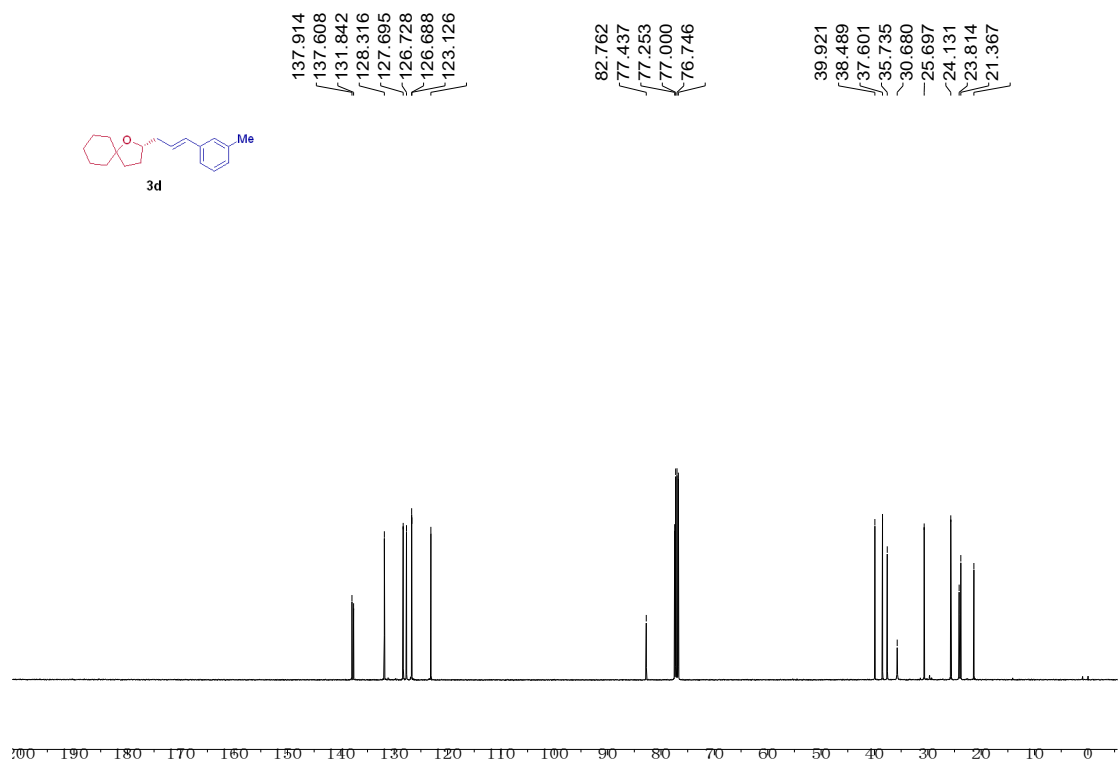

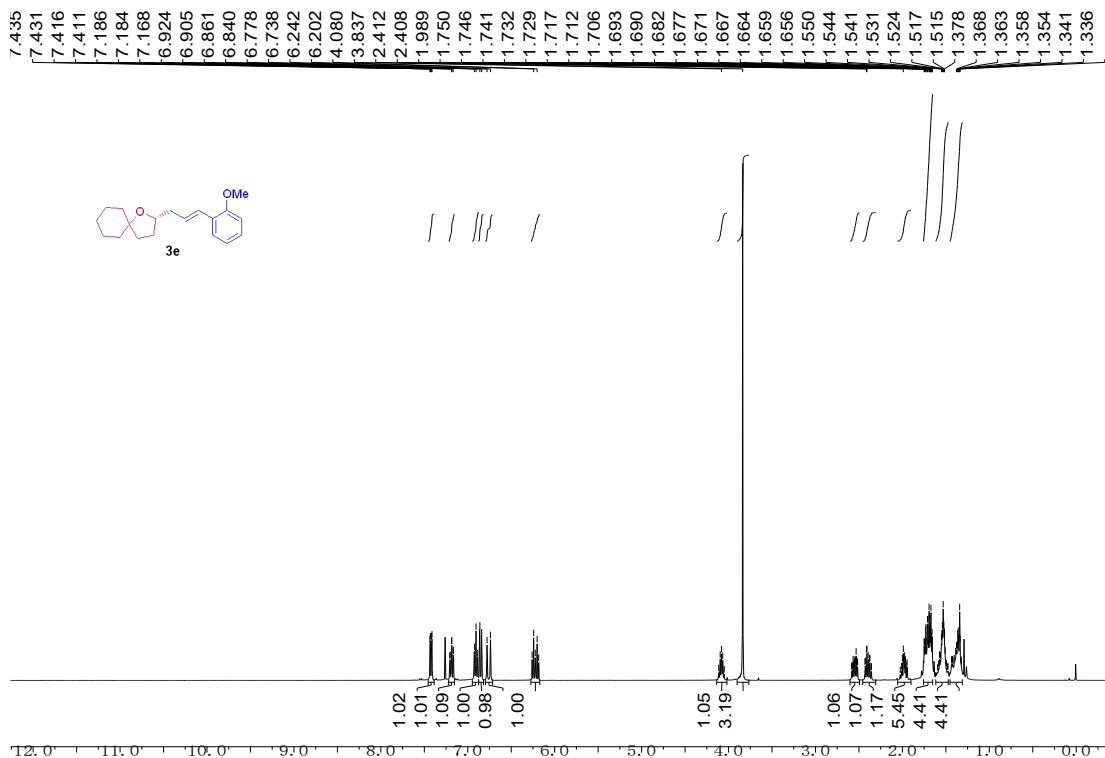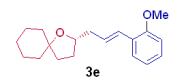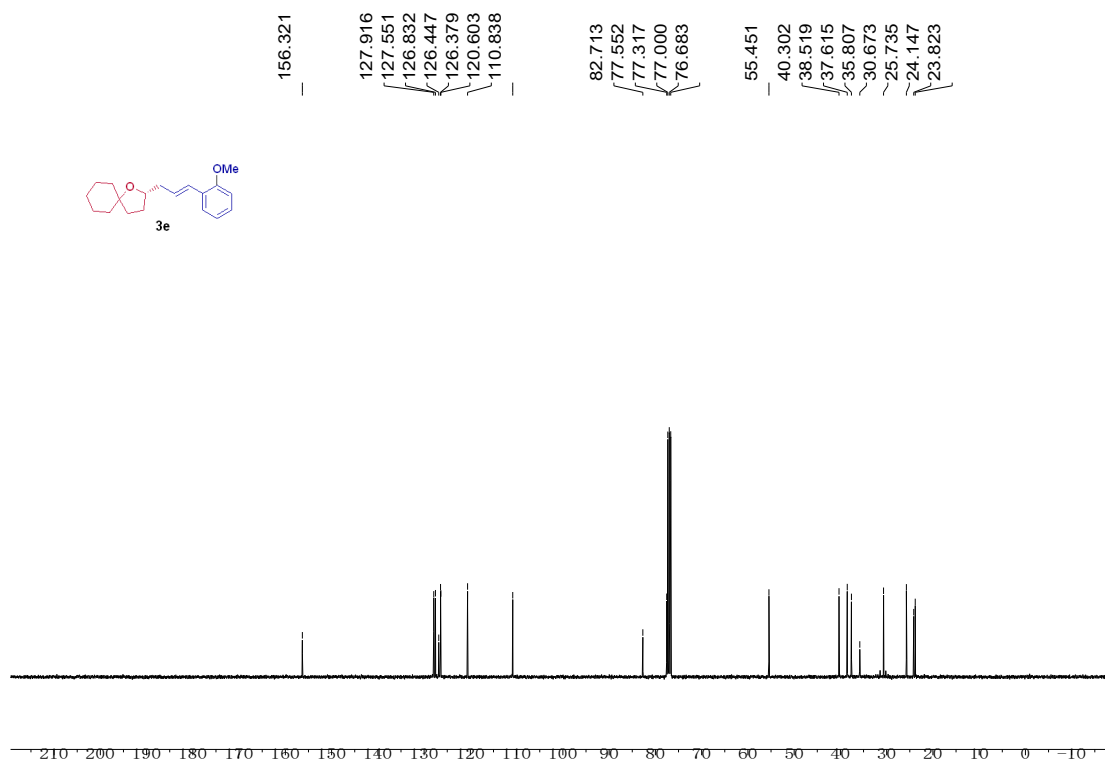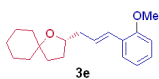



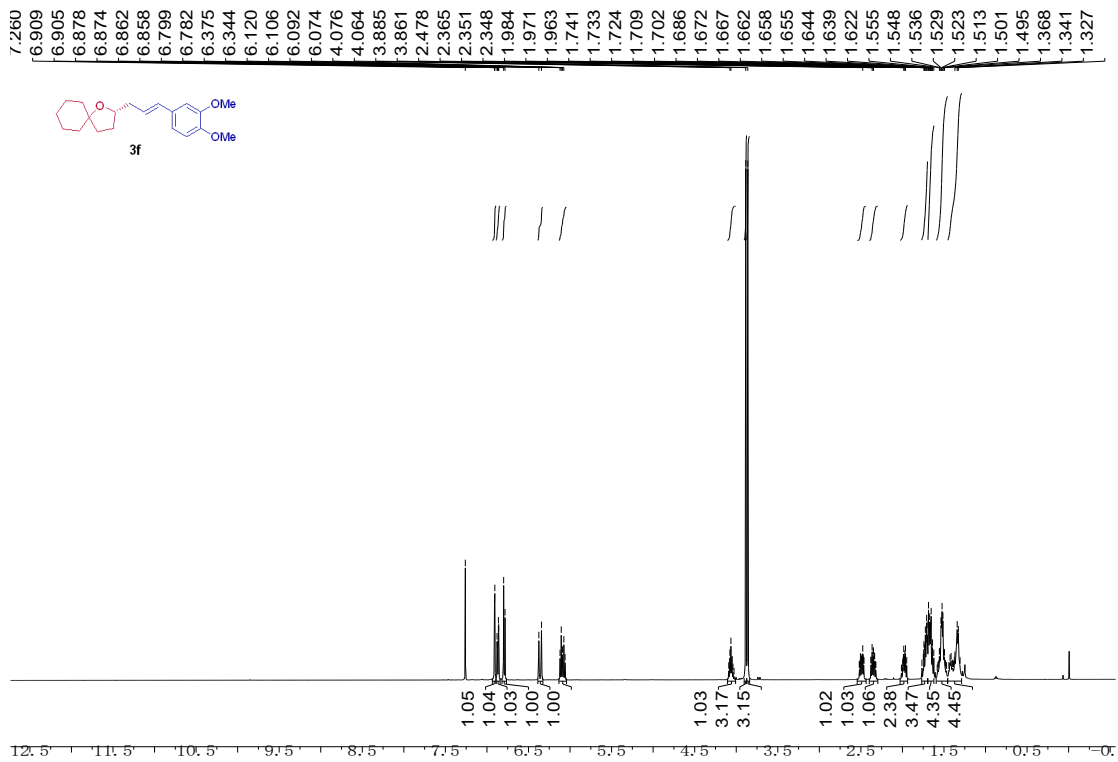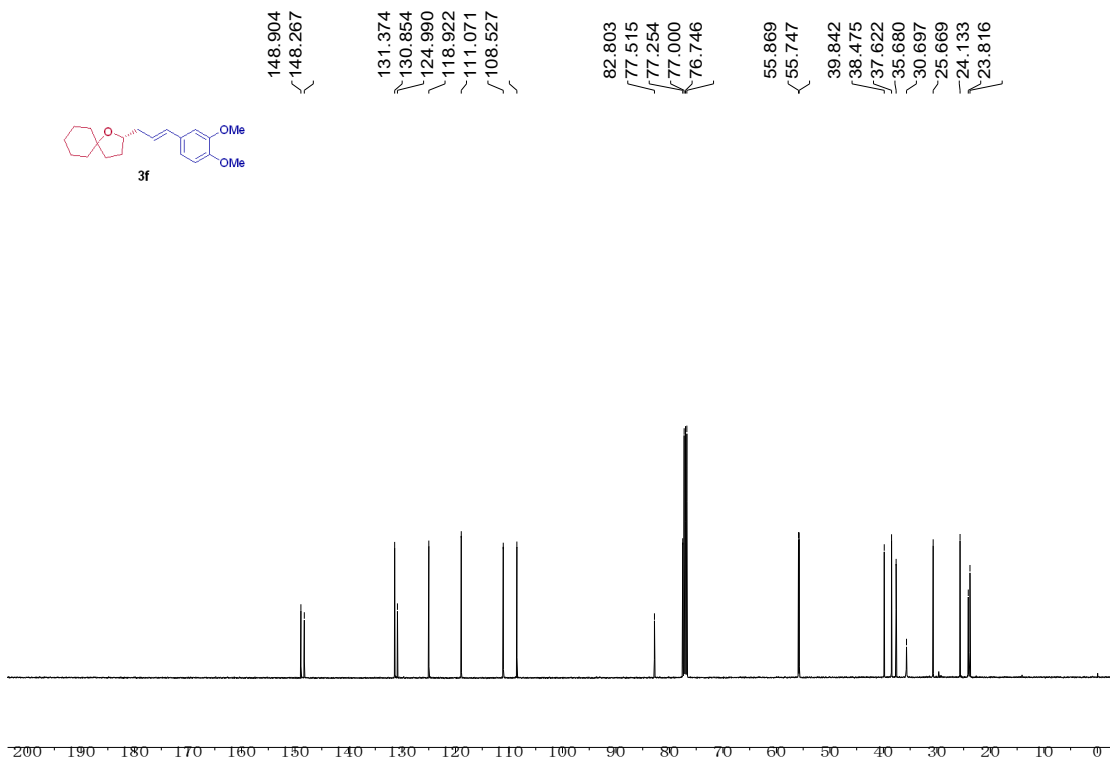

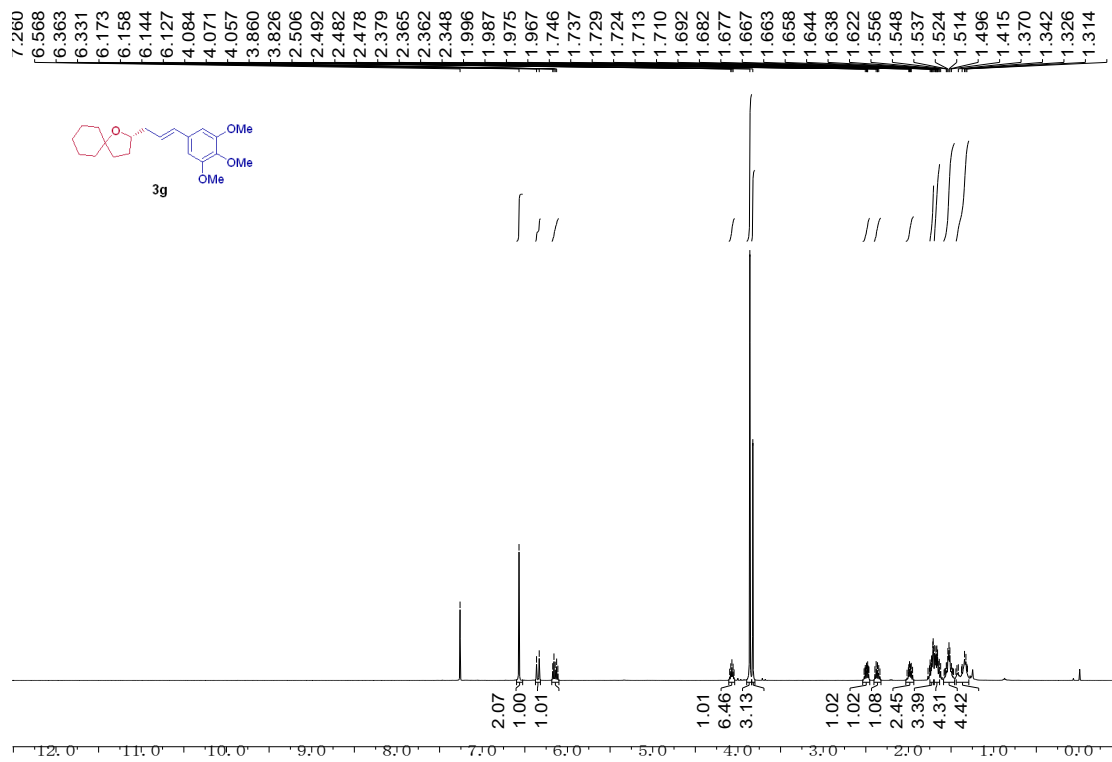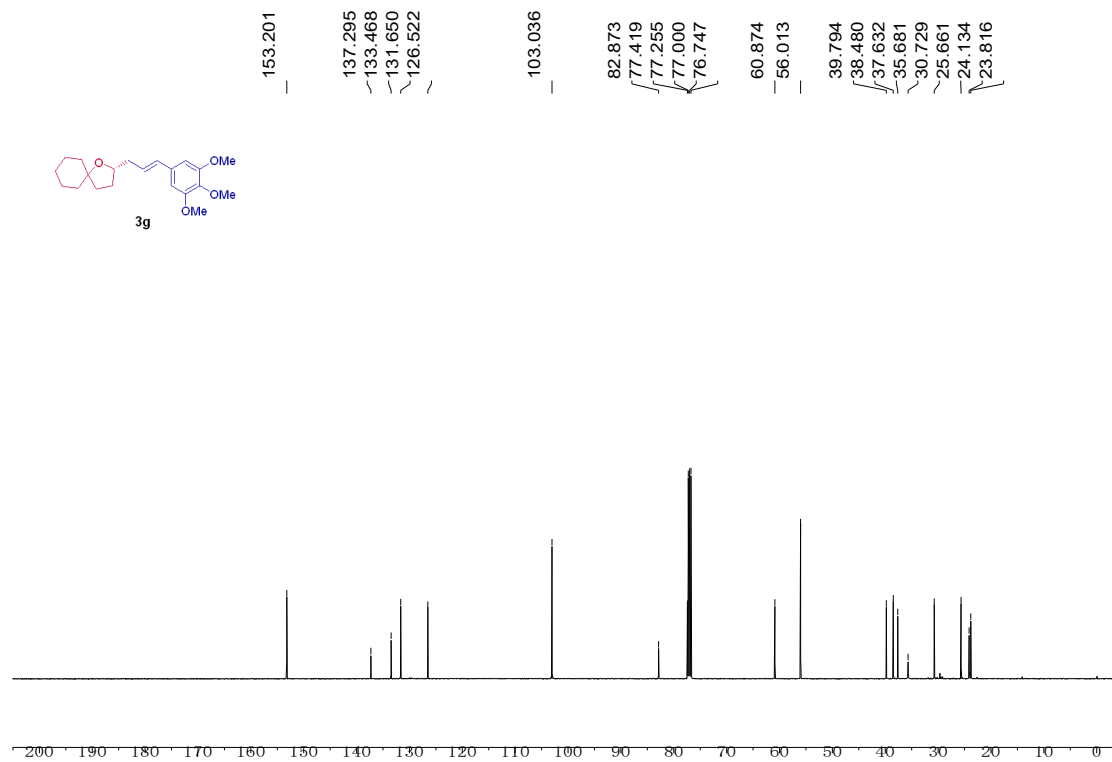

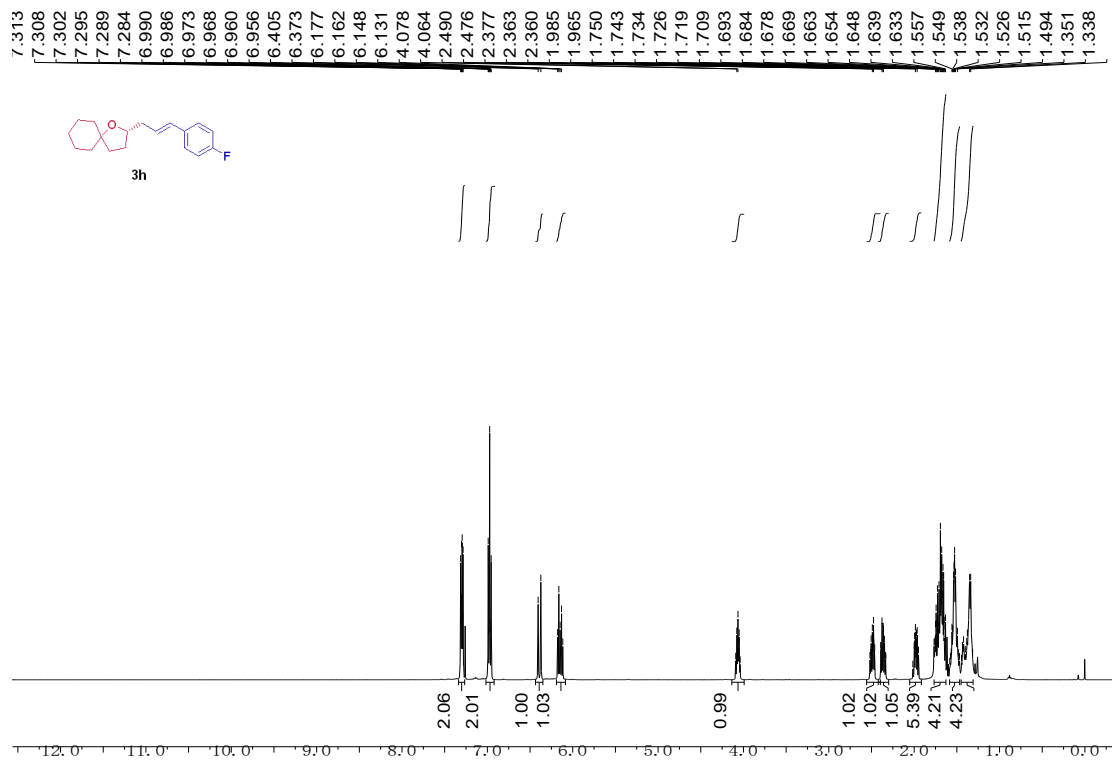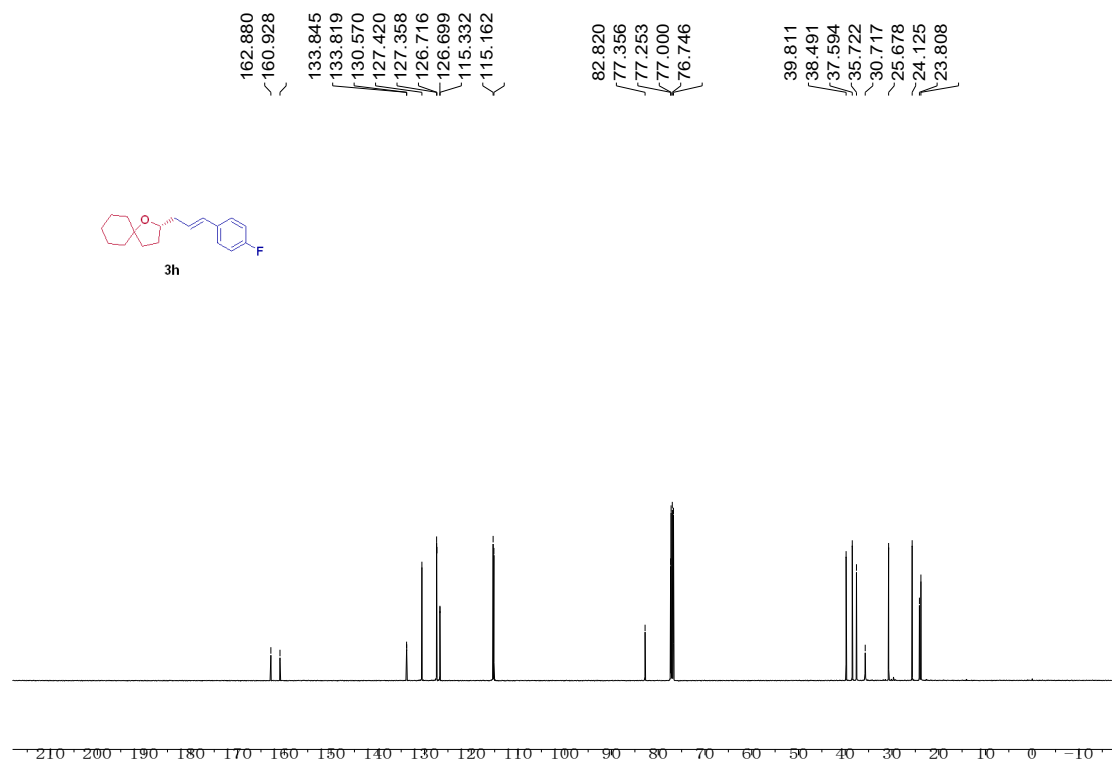

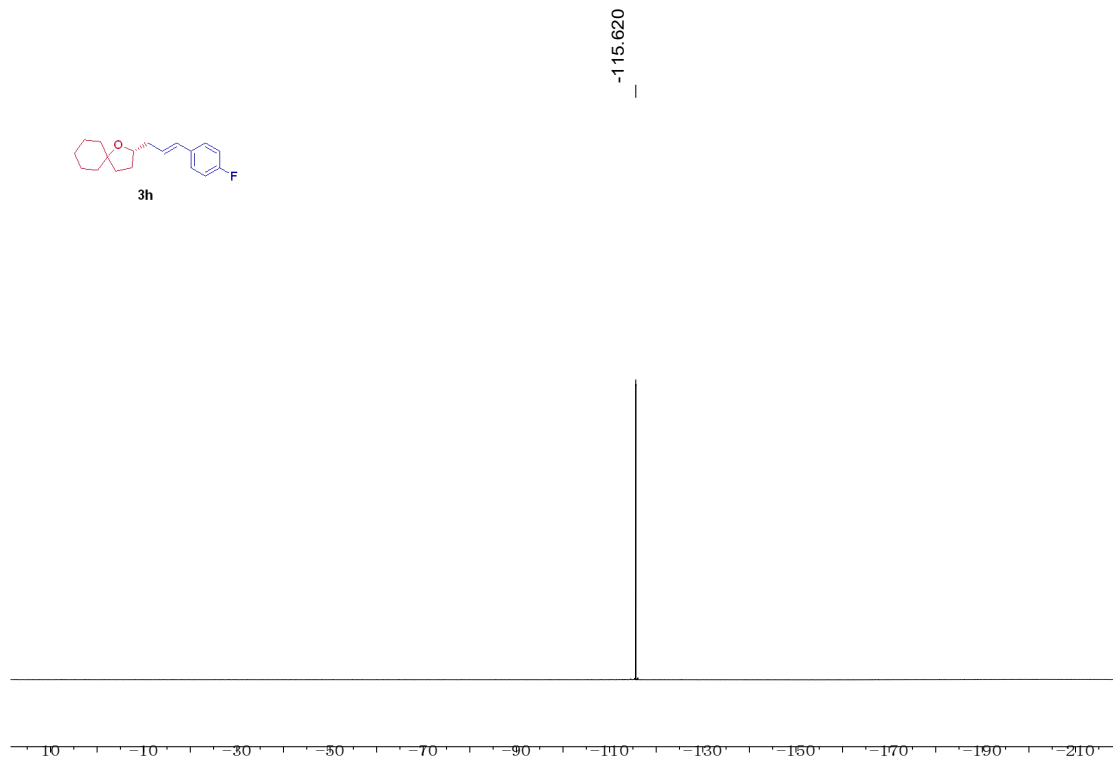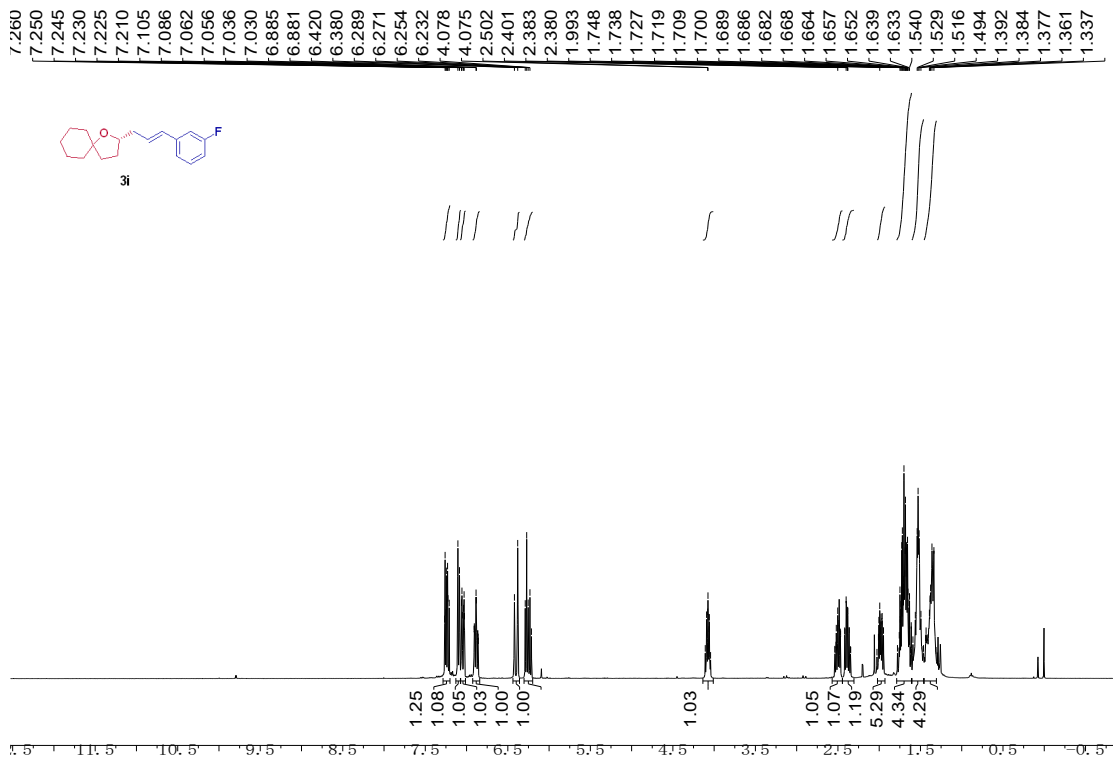

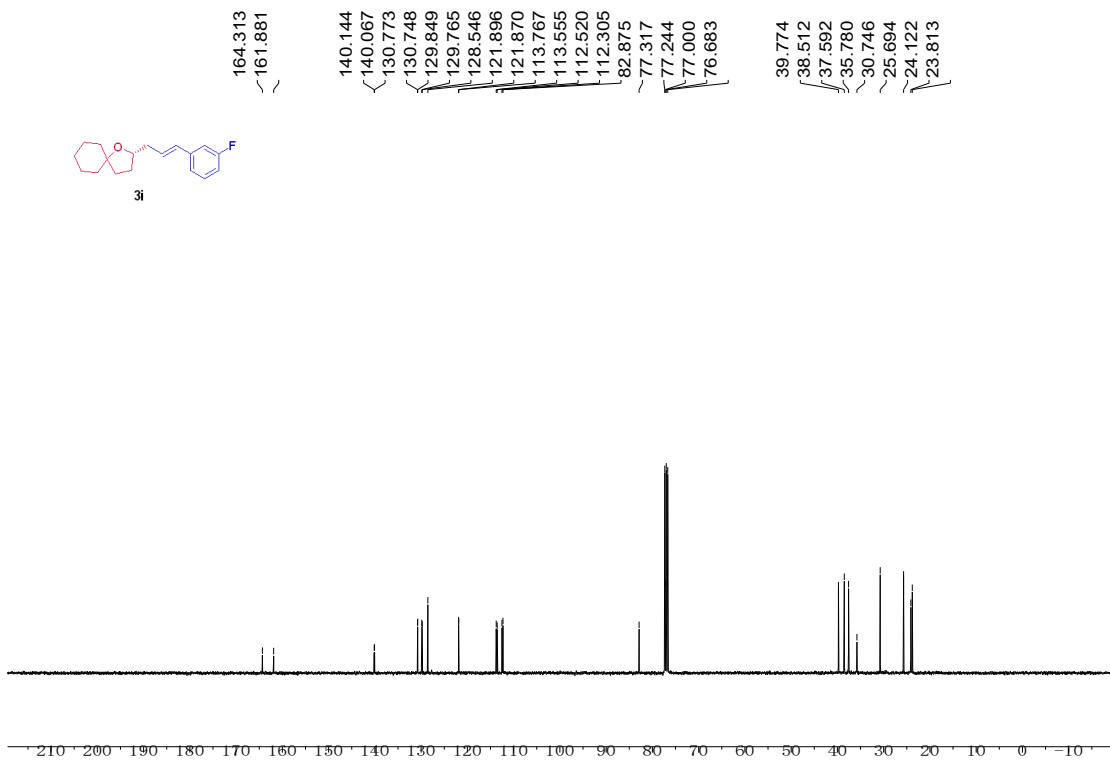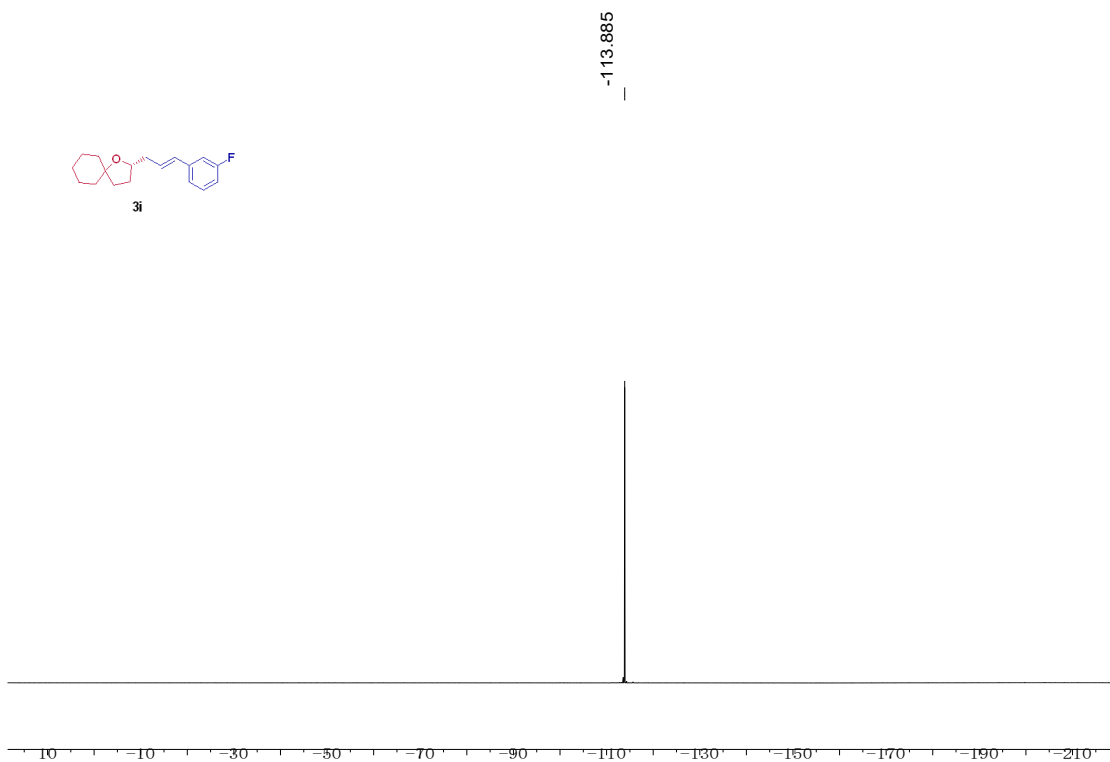

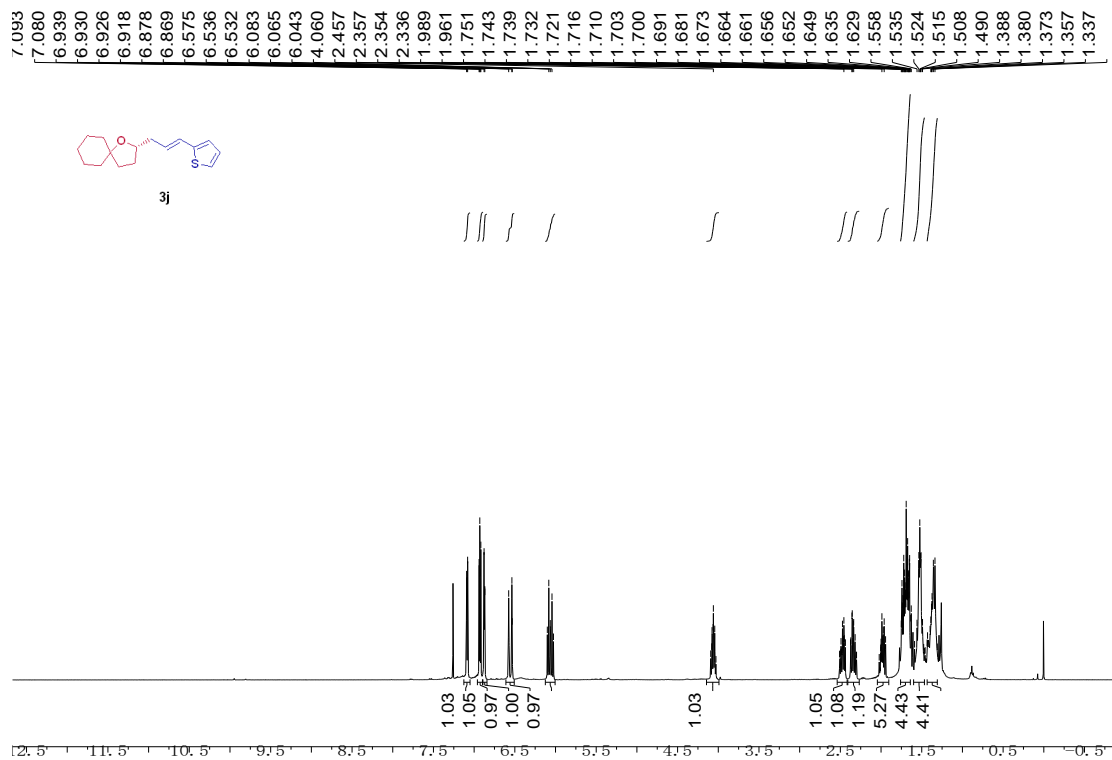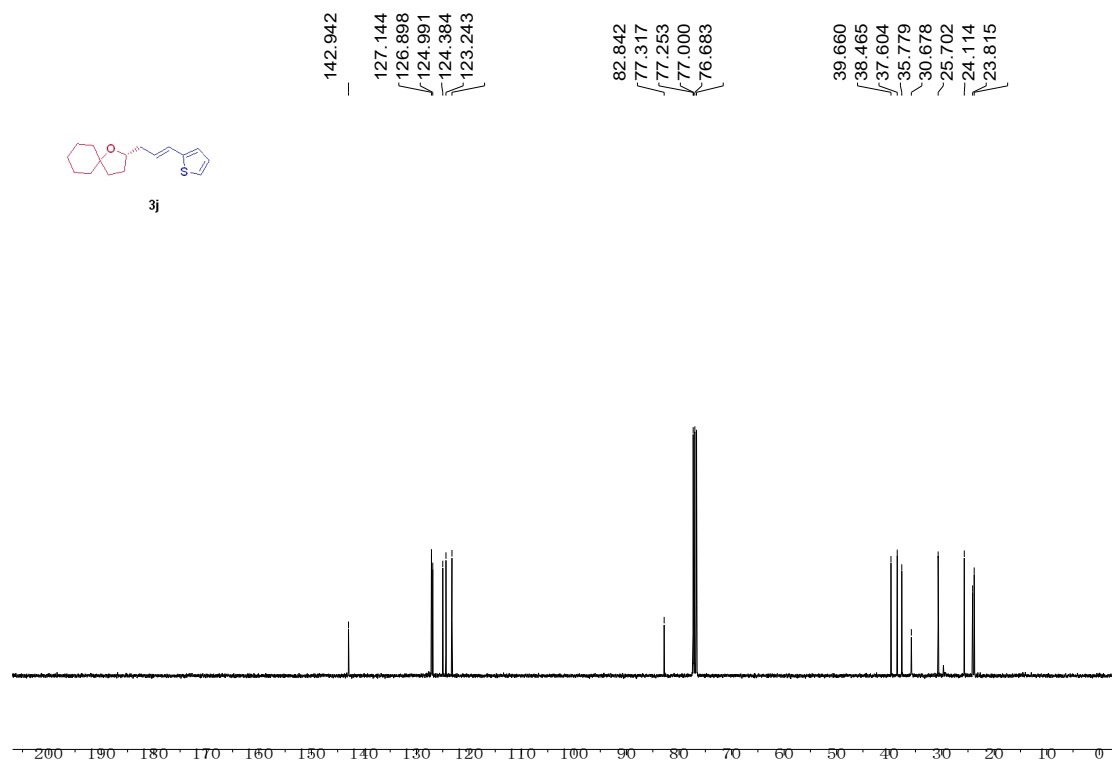

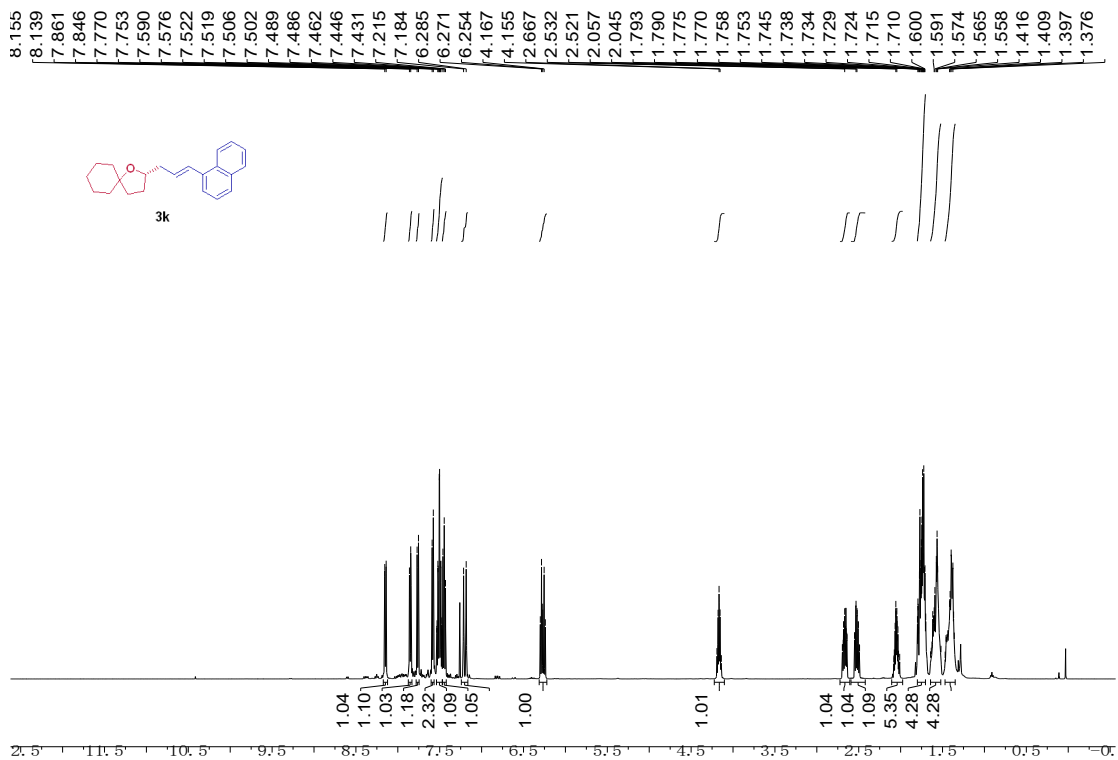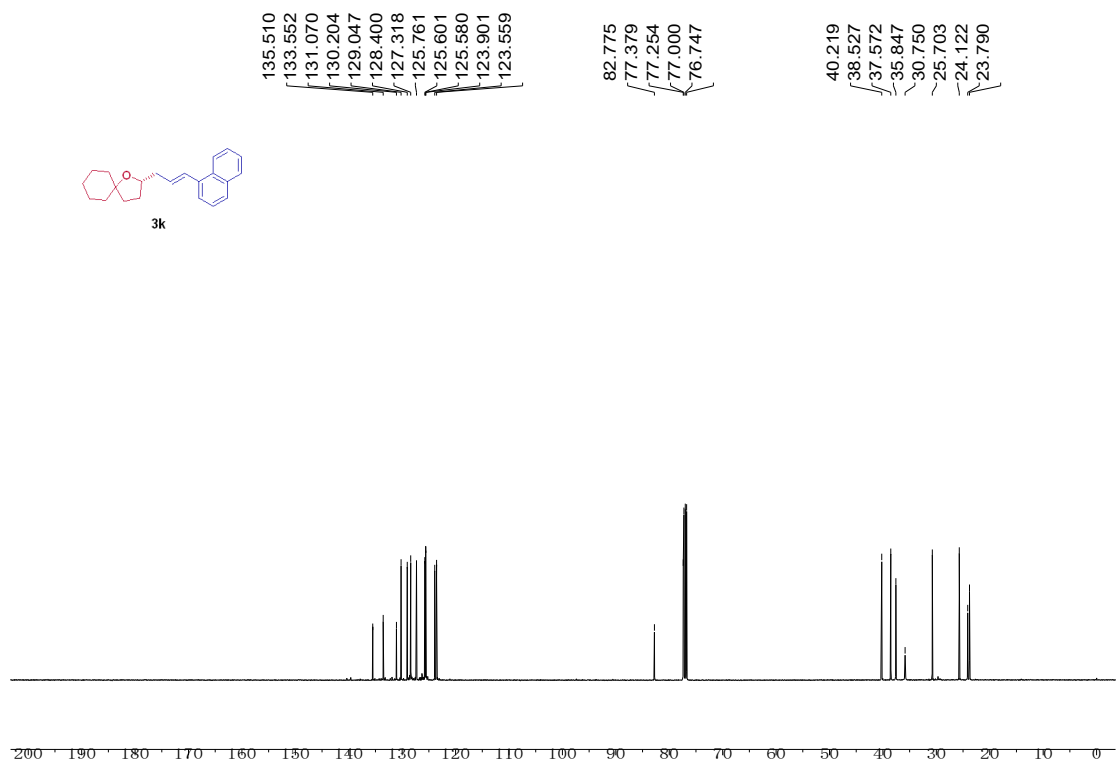

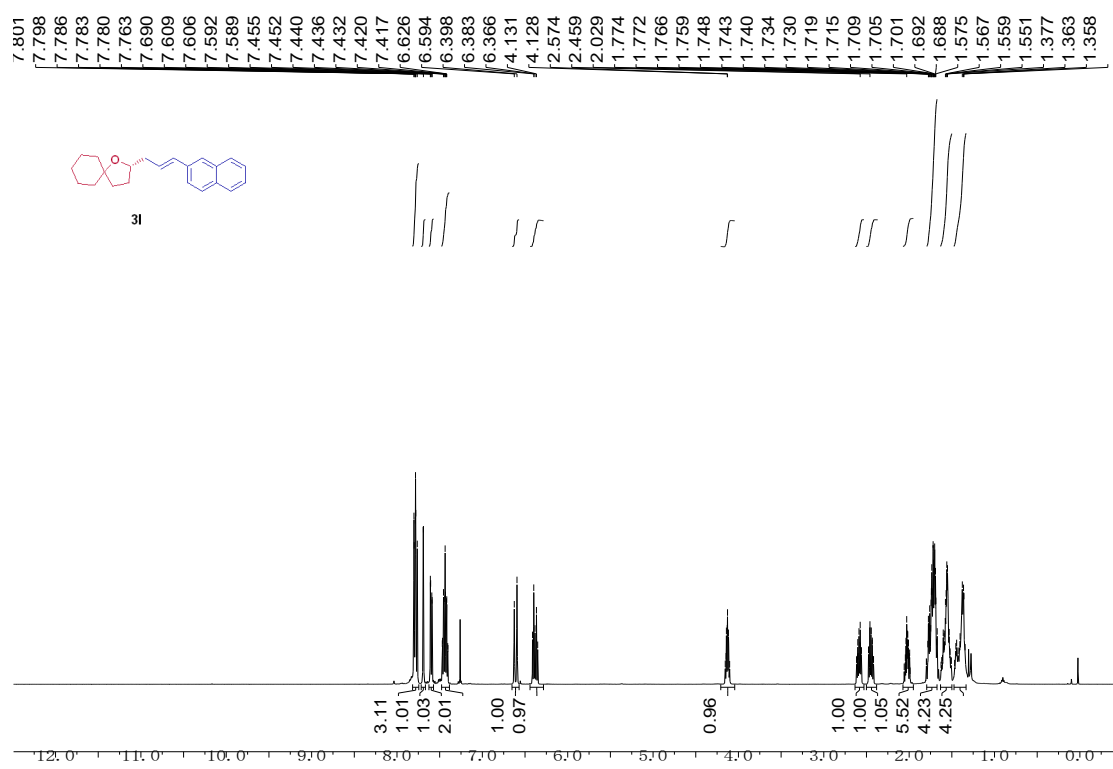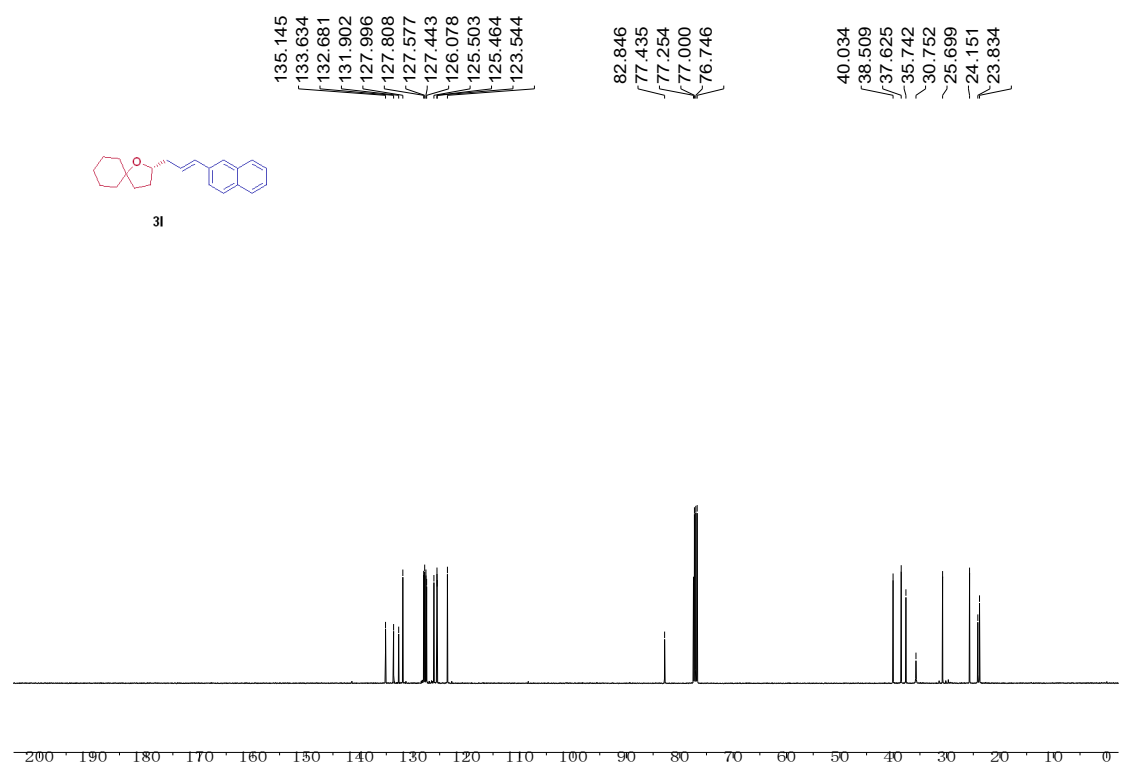



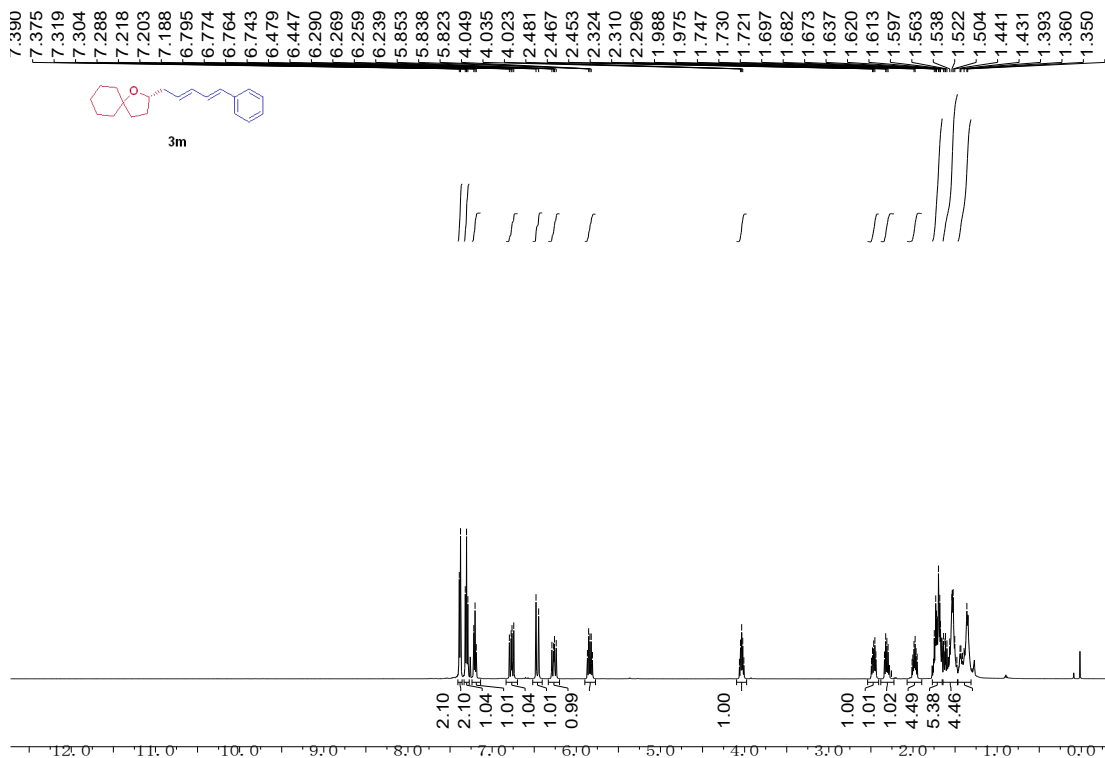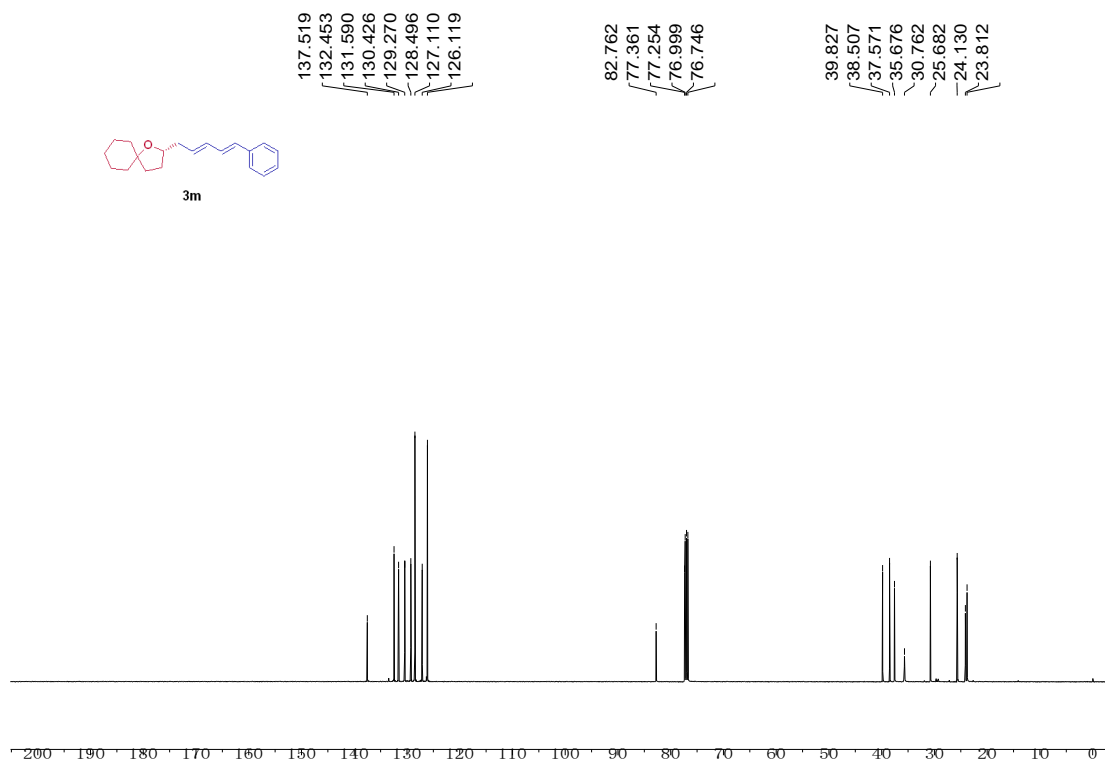

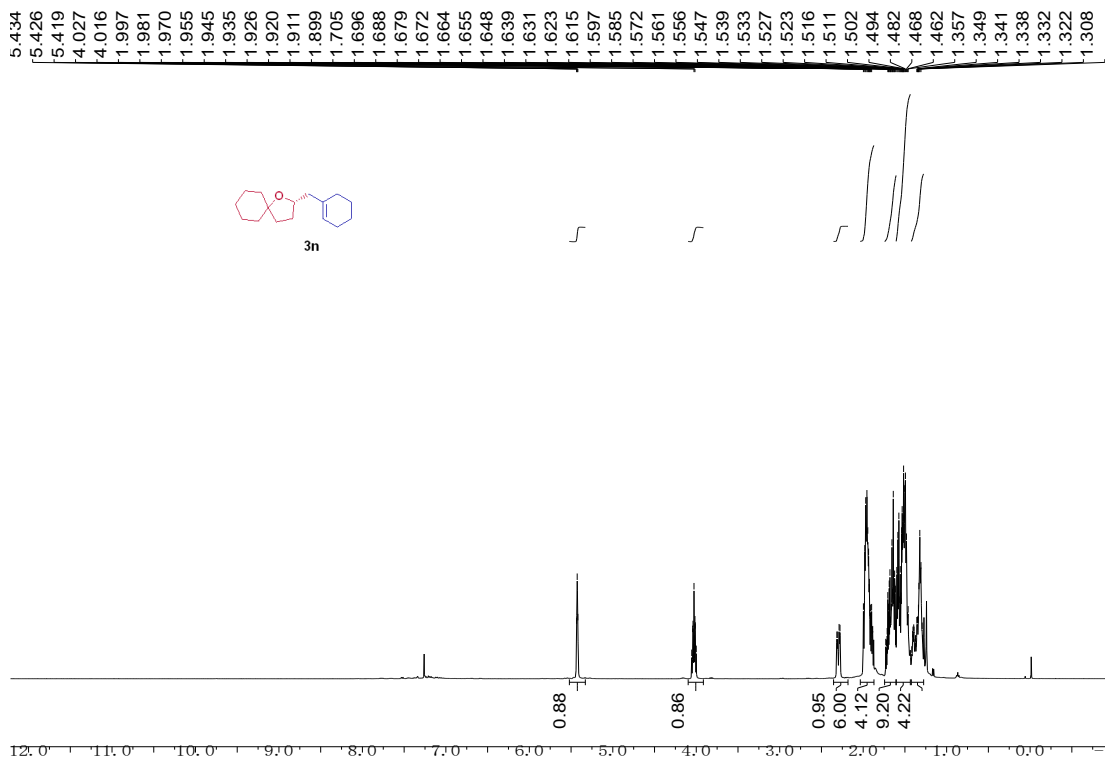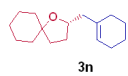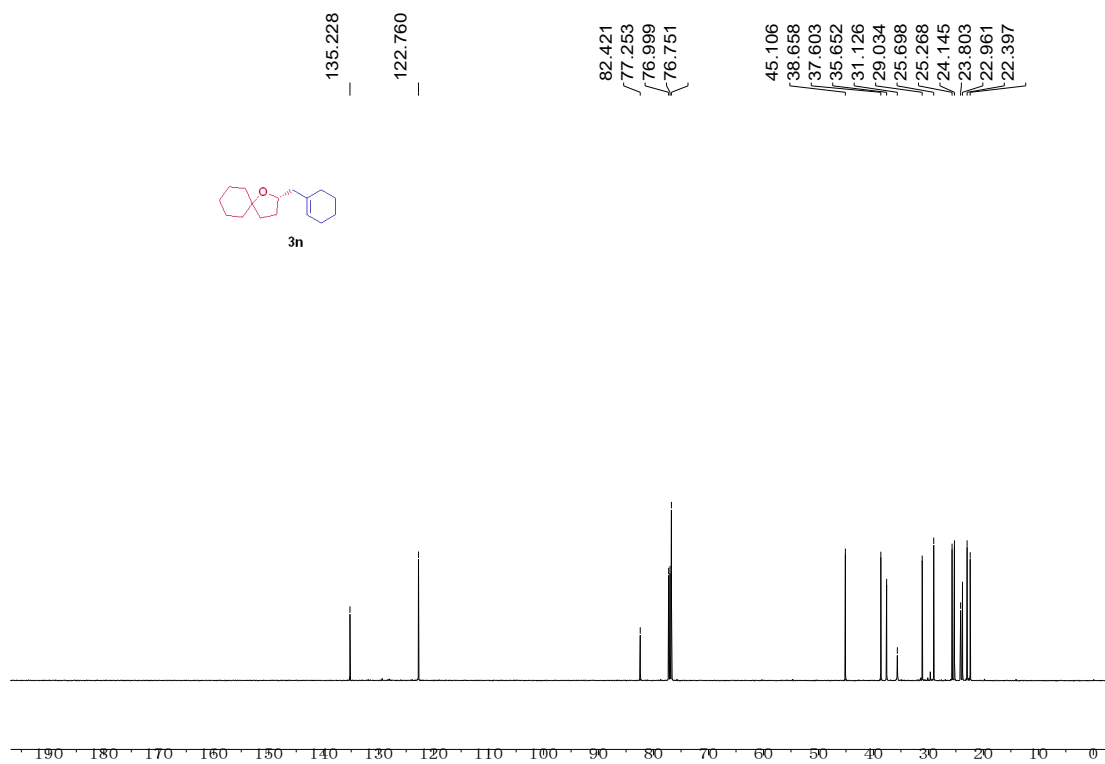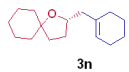

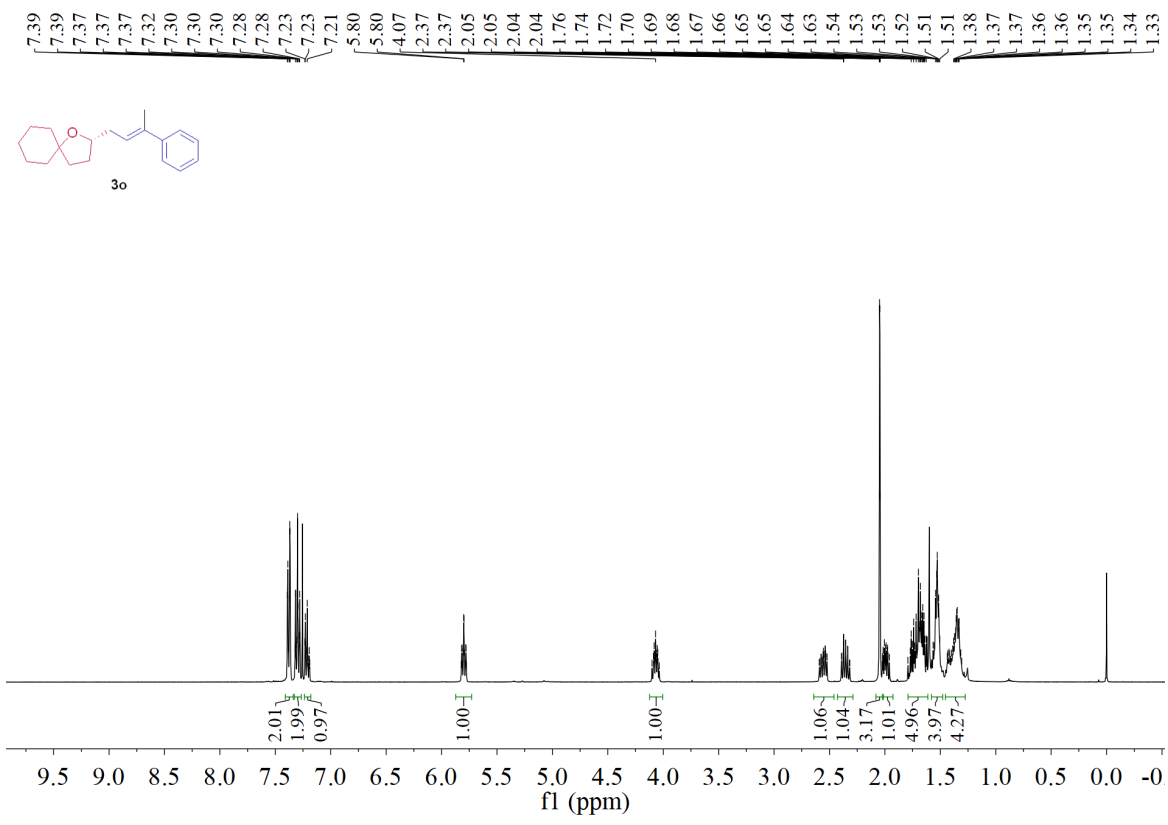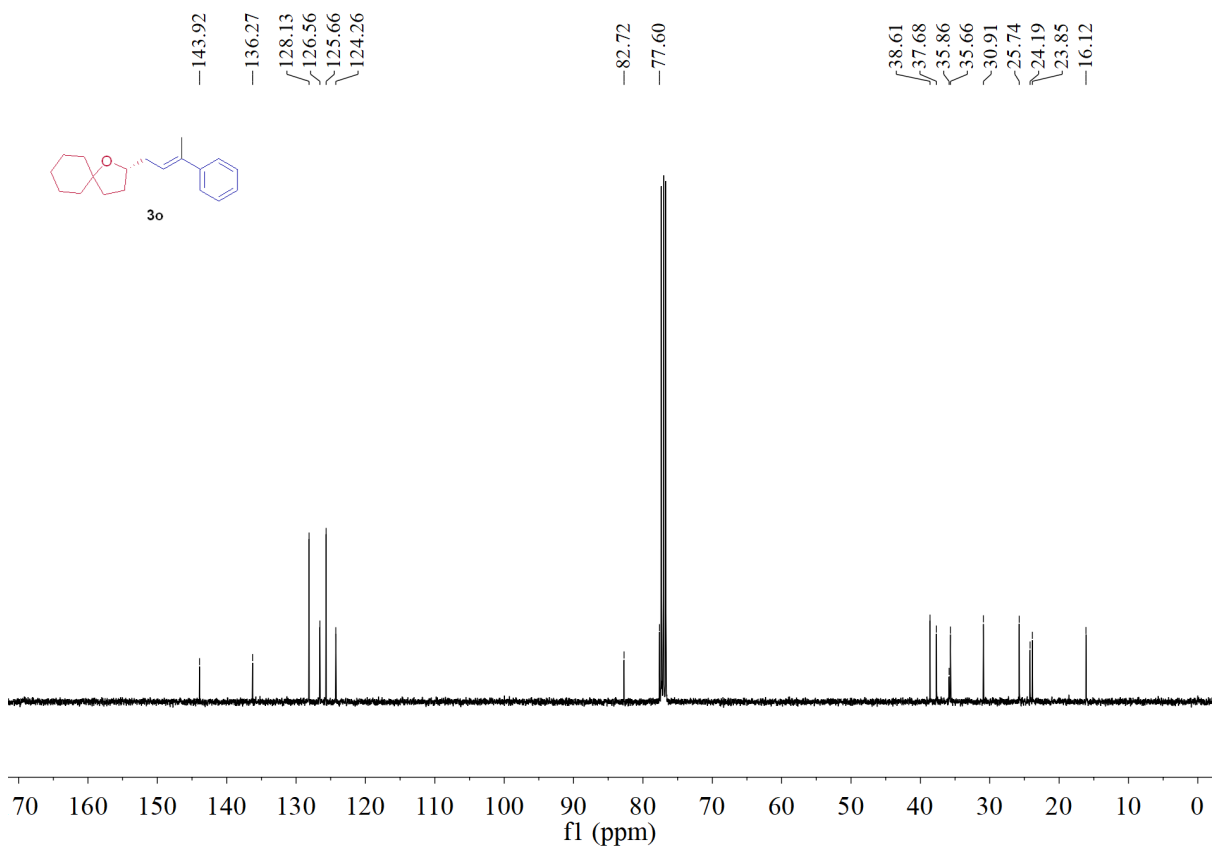

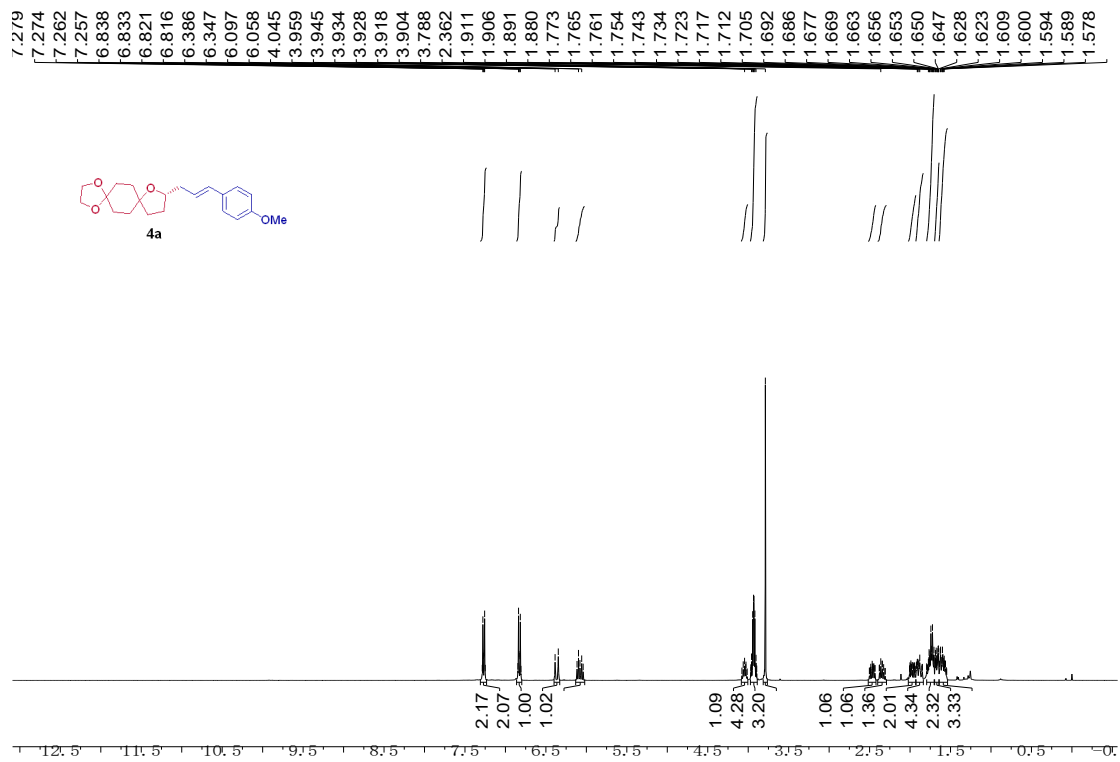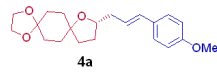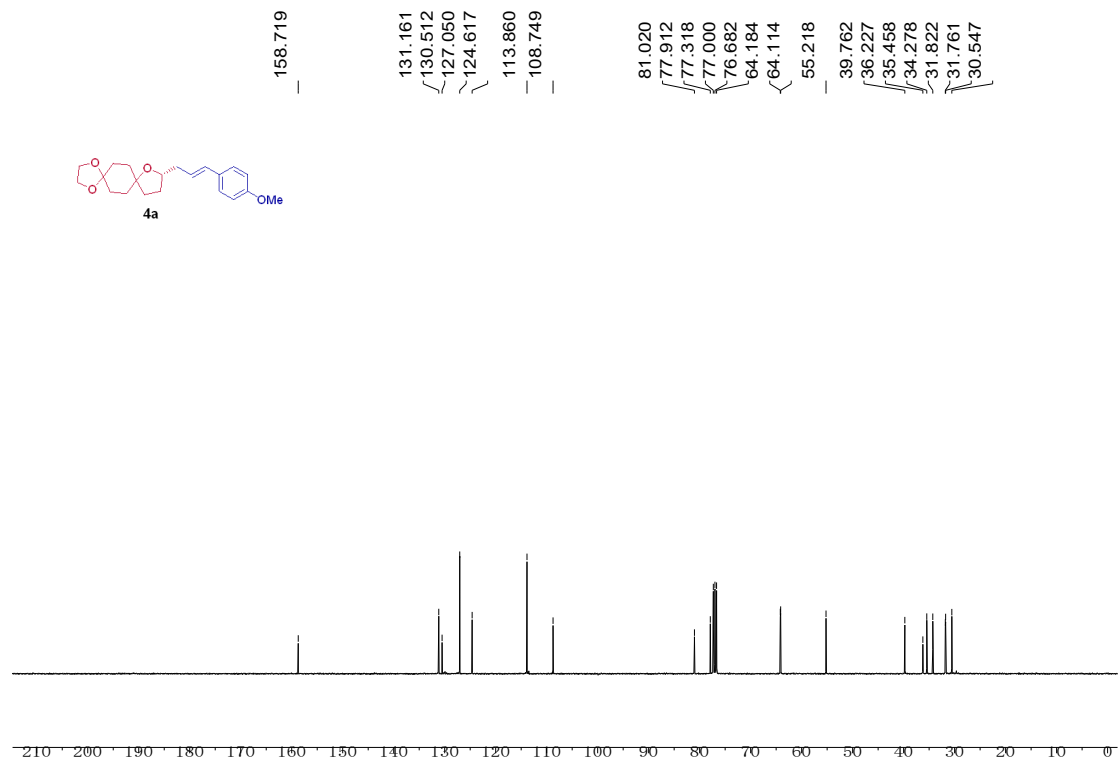

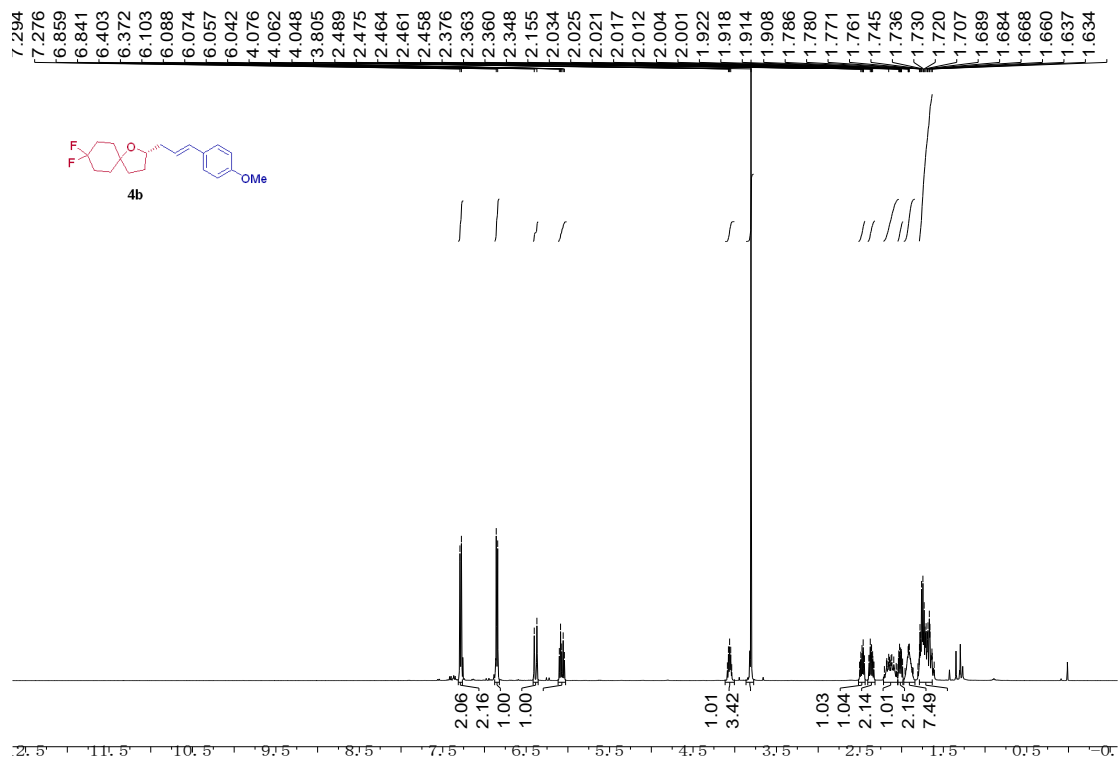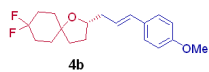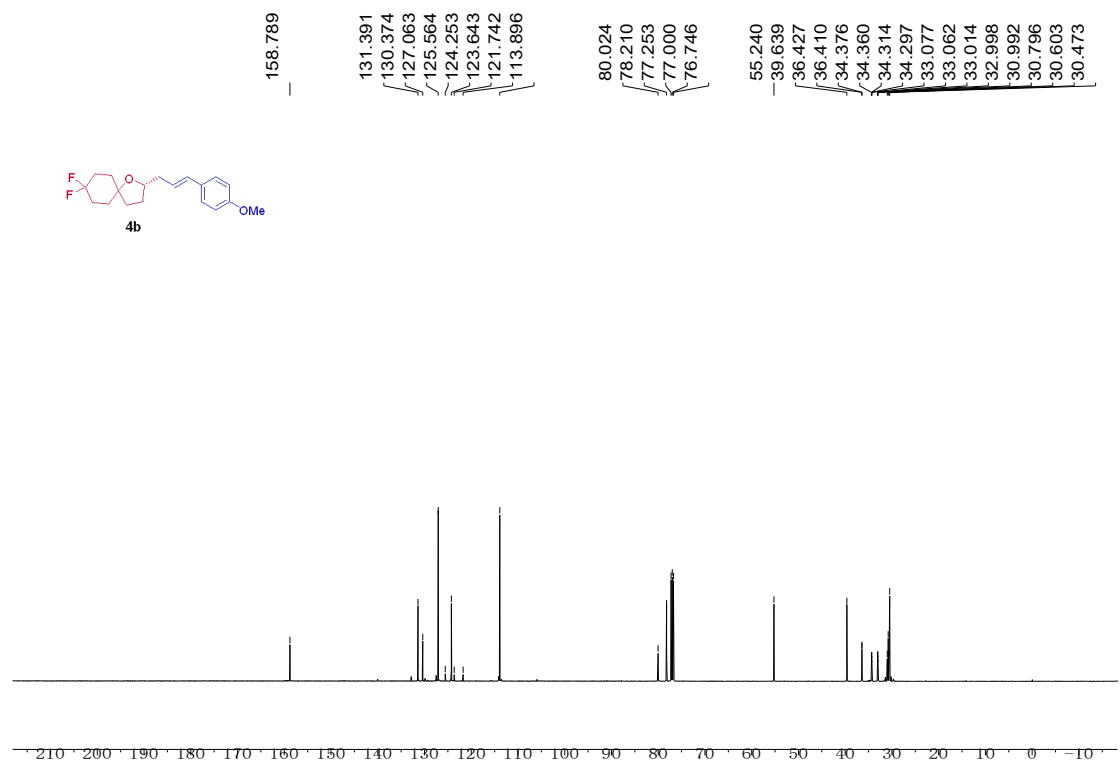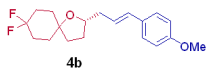

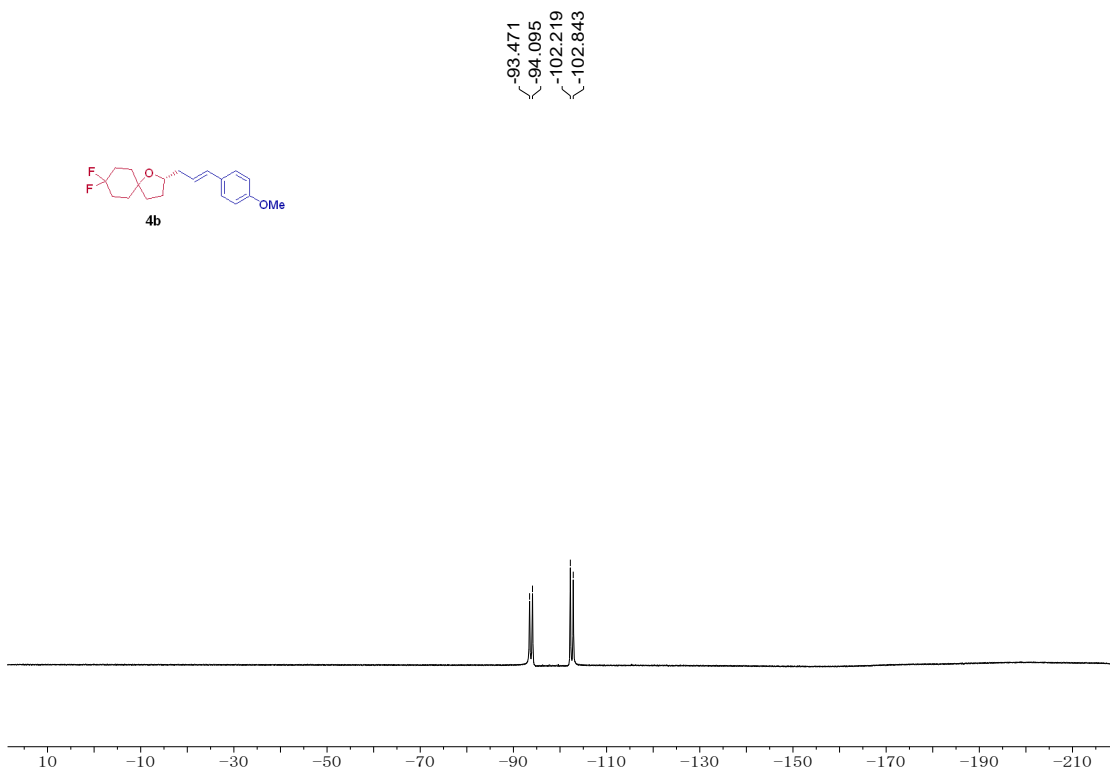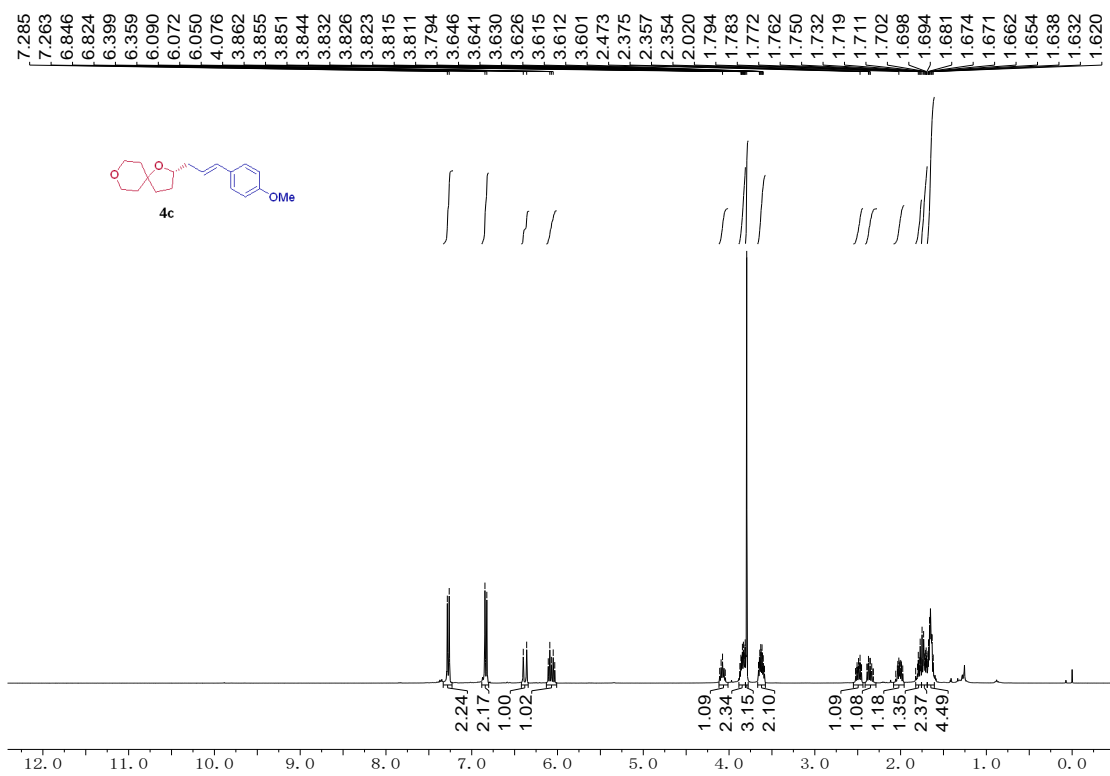

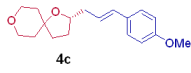

158.794

131.377  
130.436  
127.073  
124.338  
113.901

79.418  
77.881  
77.317  
77.000  
76.683  
65.544  
65.410  
55.247

39.742  
38.725  
37.643  
36.541  
30.319

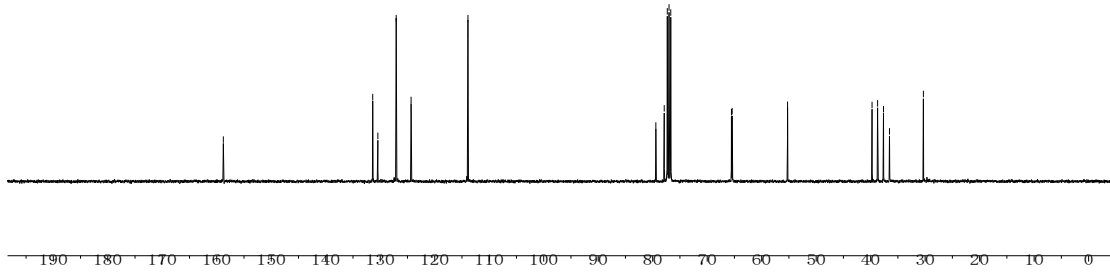

7.283  
7.261  
6.839  
6.817  
6.384  
6.344  
6.106  
6.088  
6.070  
6.048  
6.030  
4.016  
4.002  
3.988  
3.788  
2.490  
2.473  
2.347  
2.344  
2.330  
2.313  
2.309  
1.961  
1.950  
1.940  
1.935  
1.924  
1.921  
1.773  
1.765  
1.743  
1.734  
1.729  
1.723  
1.712  
1.702  
1.692  
1.682  
1.664  
1.652  
1.645  
1.635  
1.615  
1.608  
1.596  
1.563  
1.554  
1.435  
1.422  
1.409  
1.389

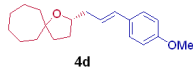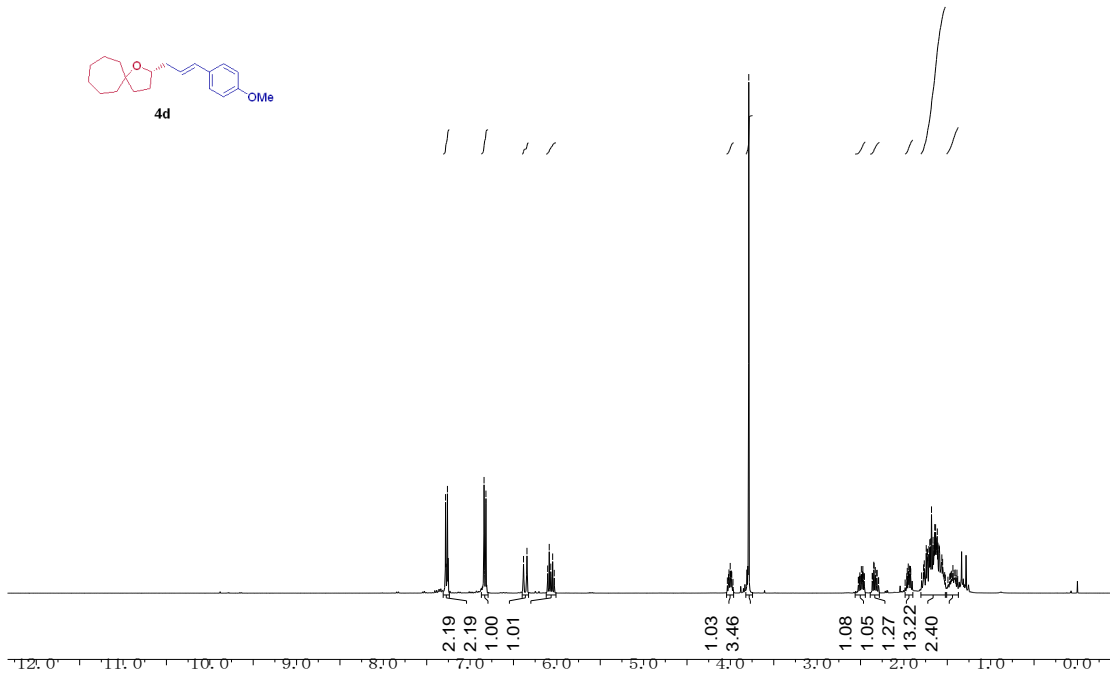

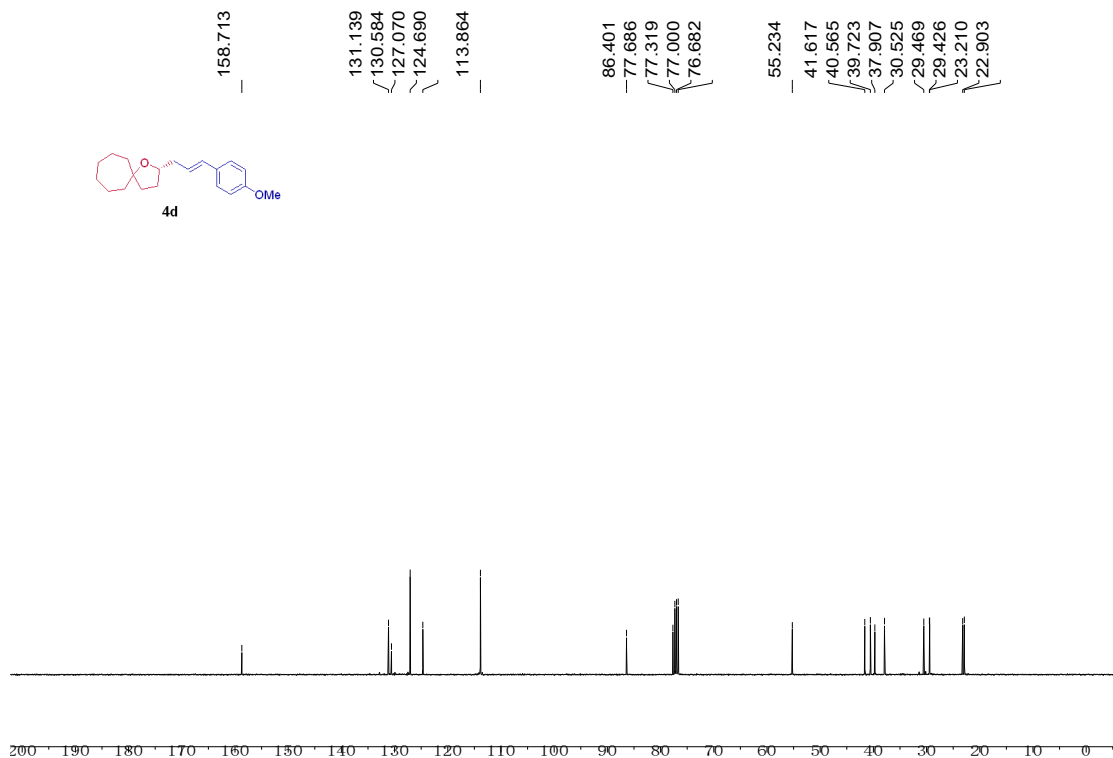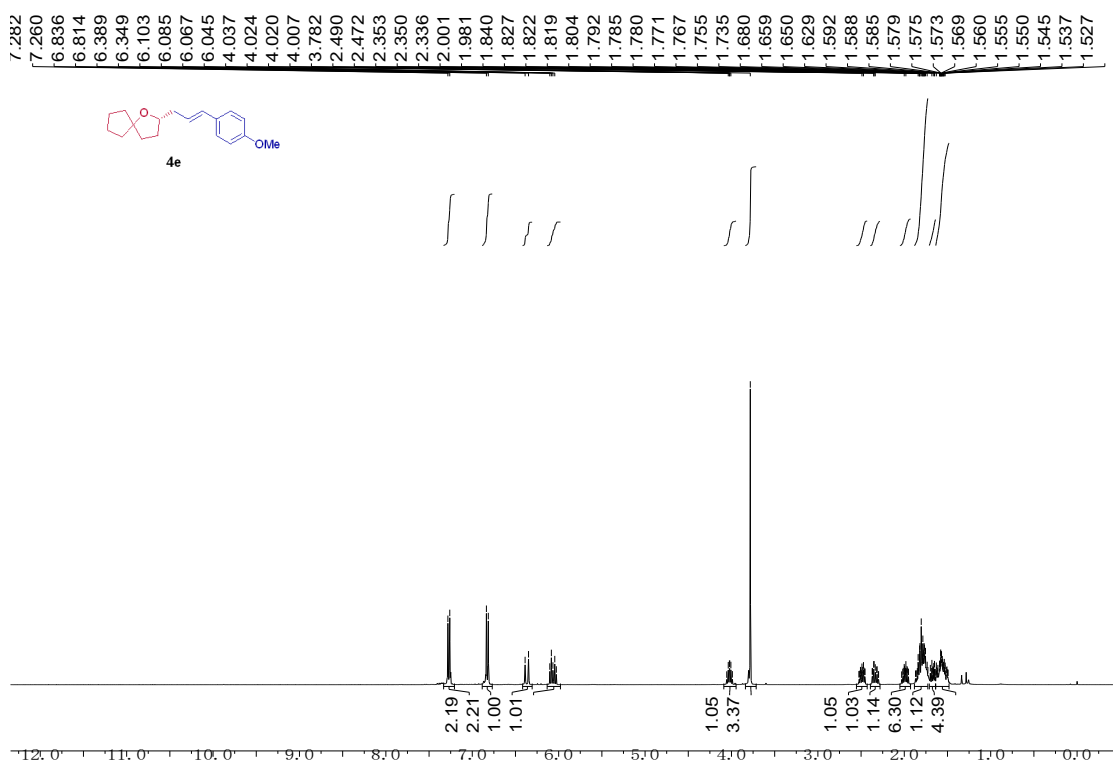



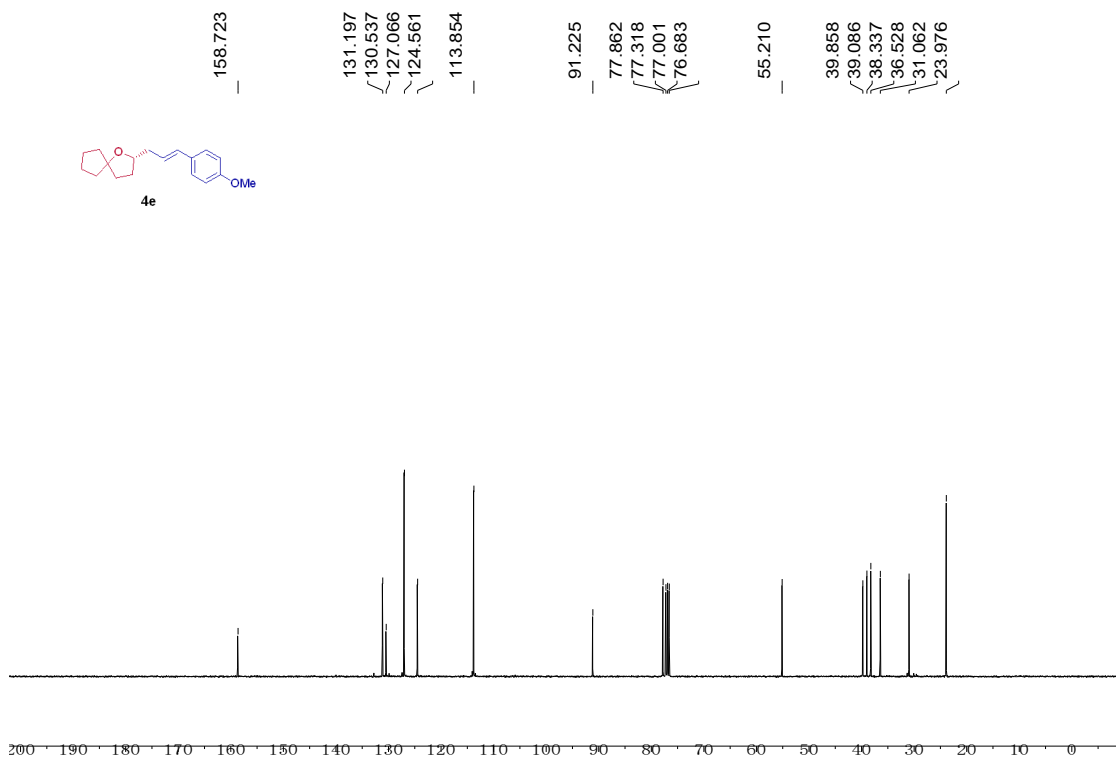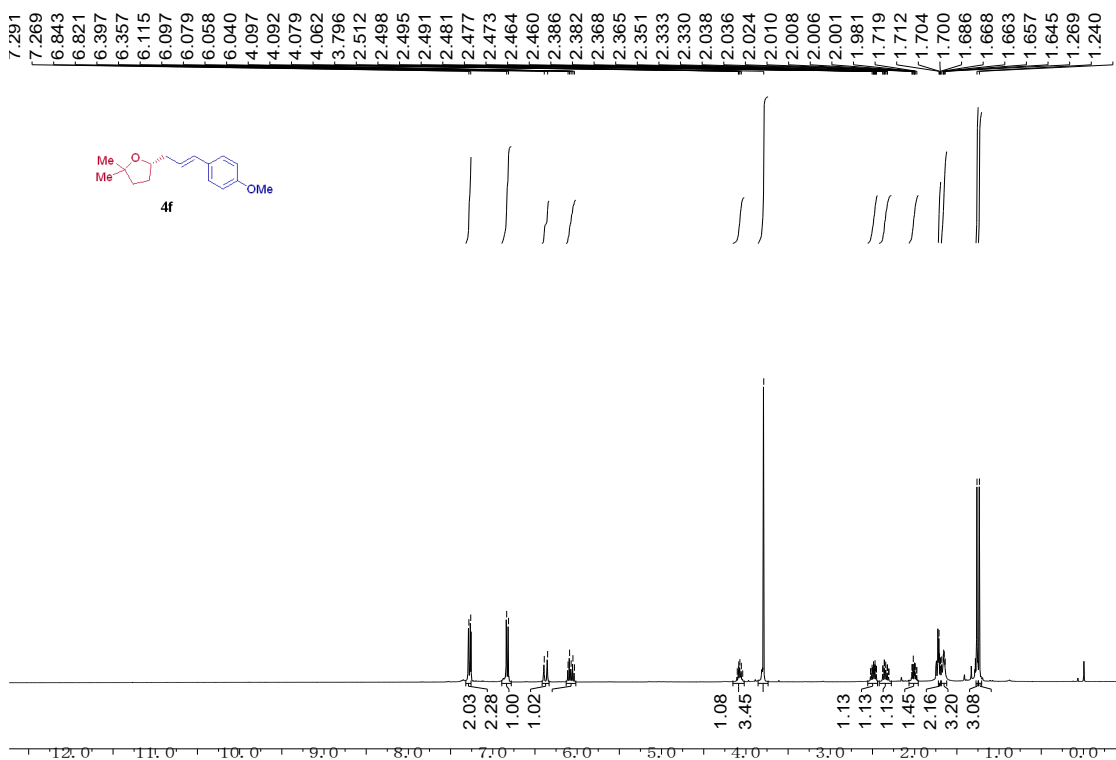

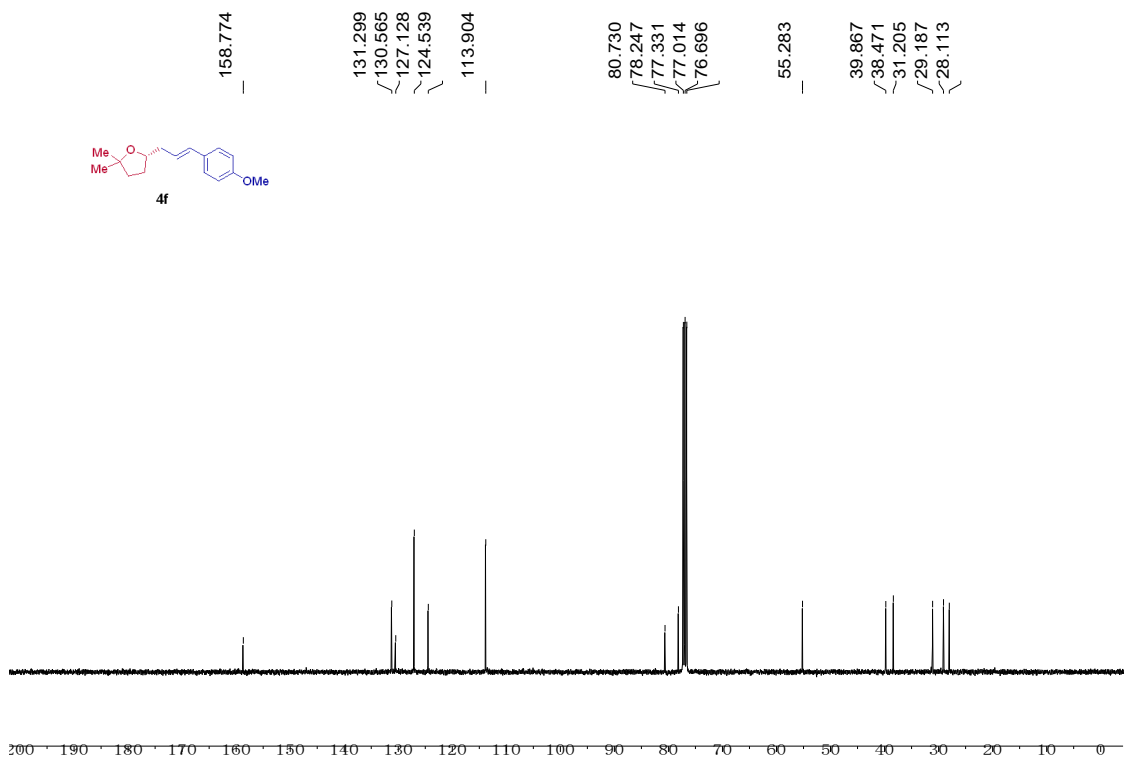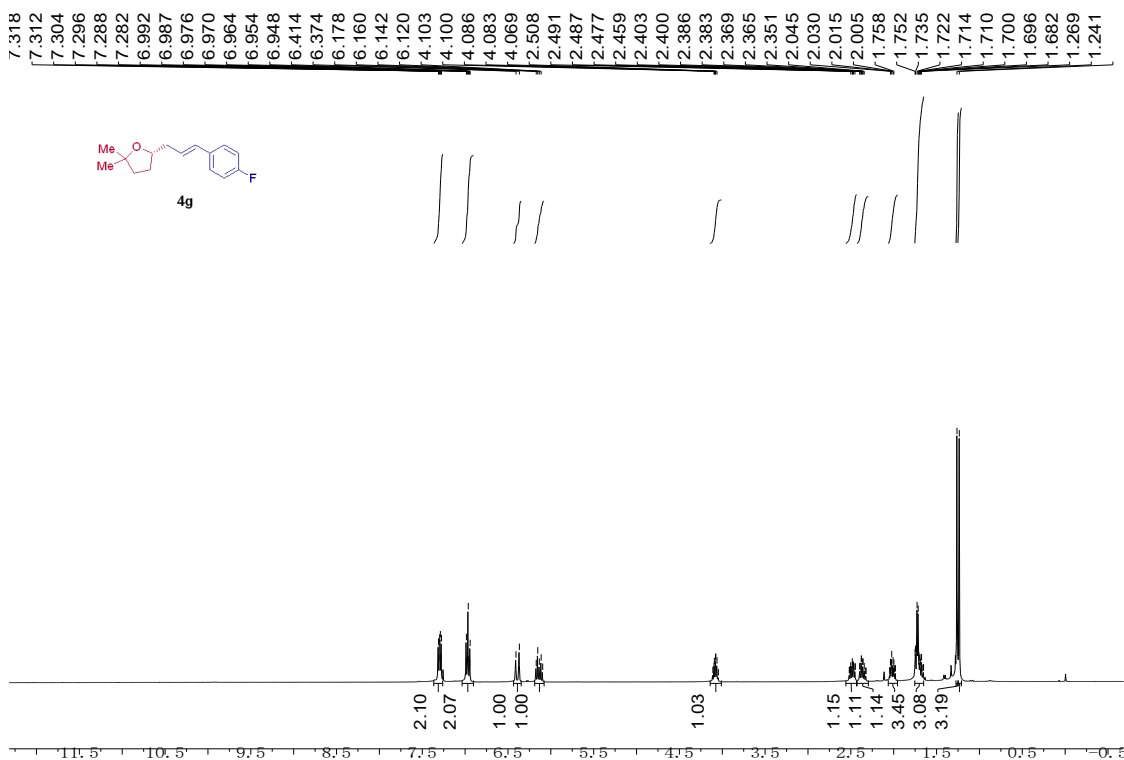

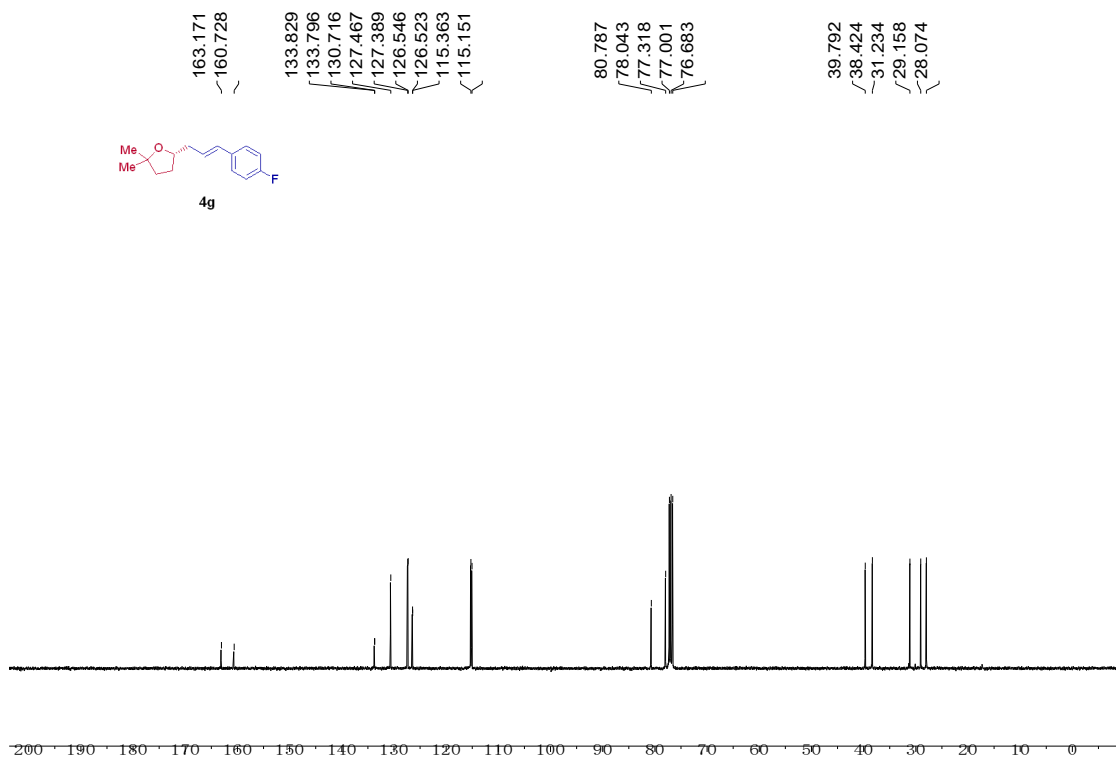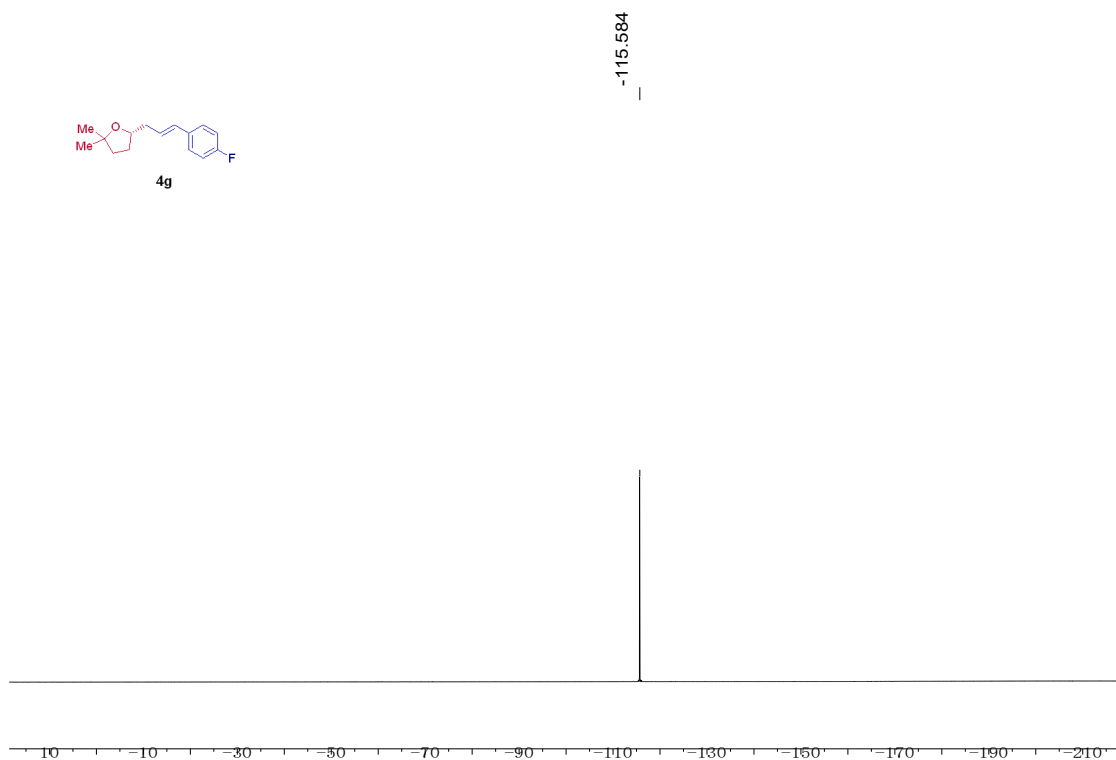

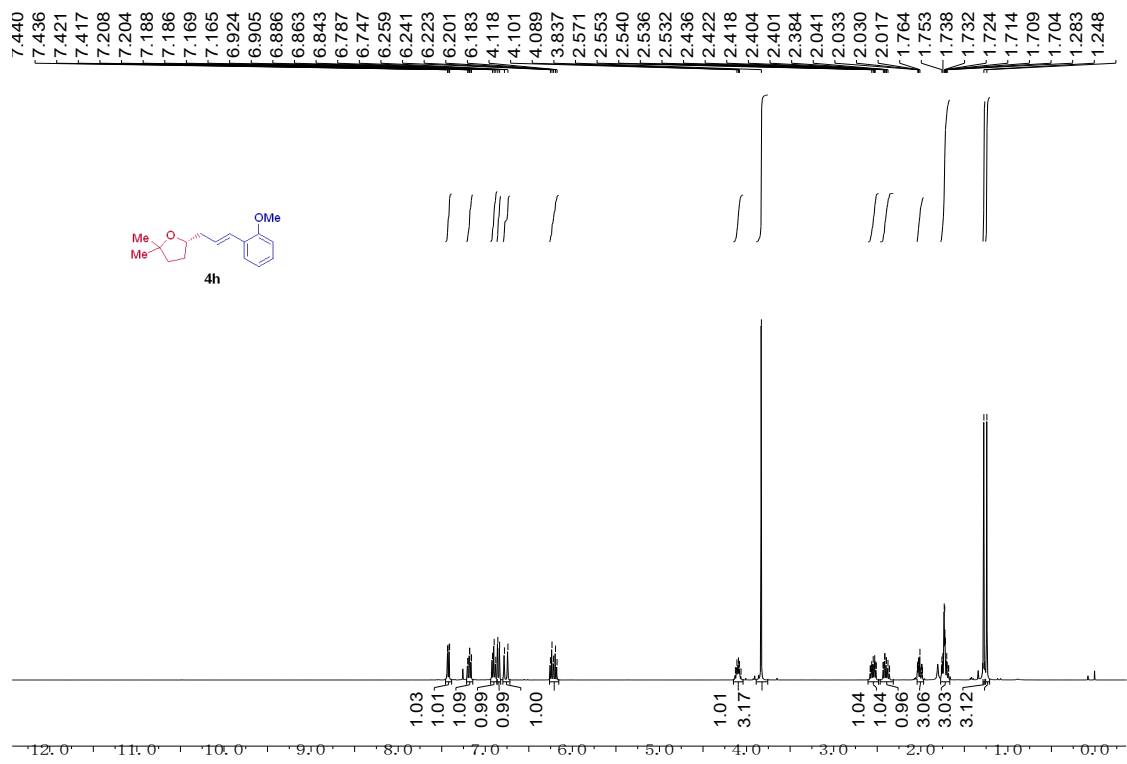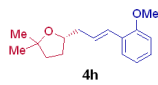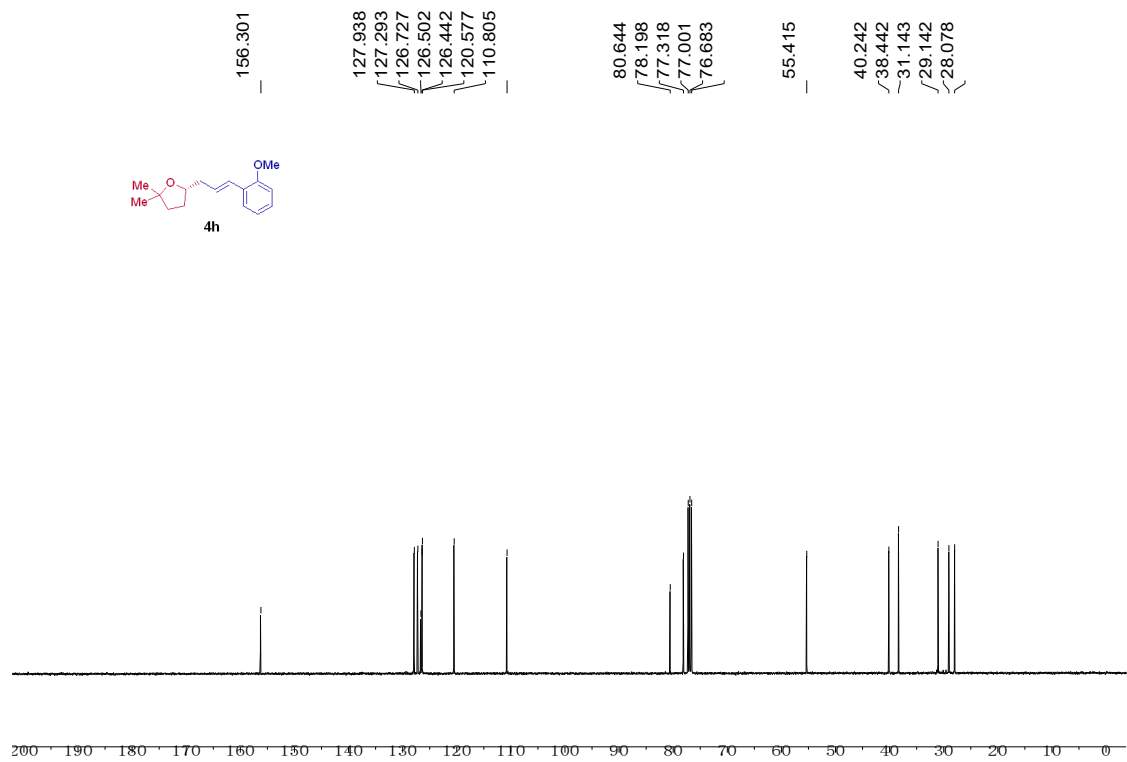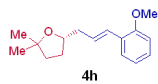

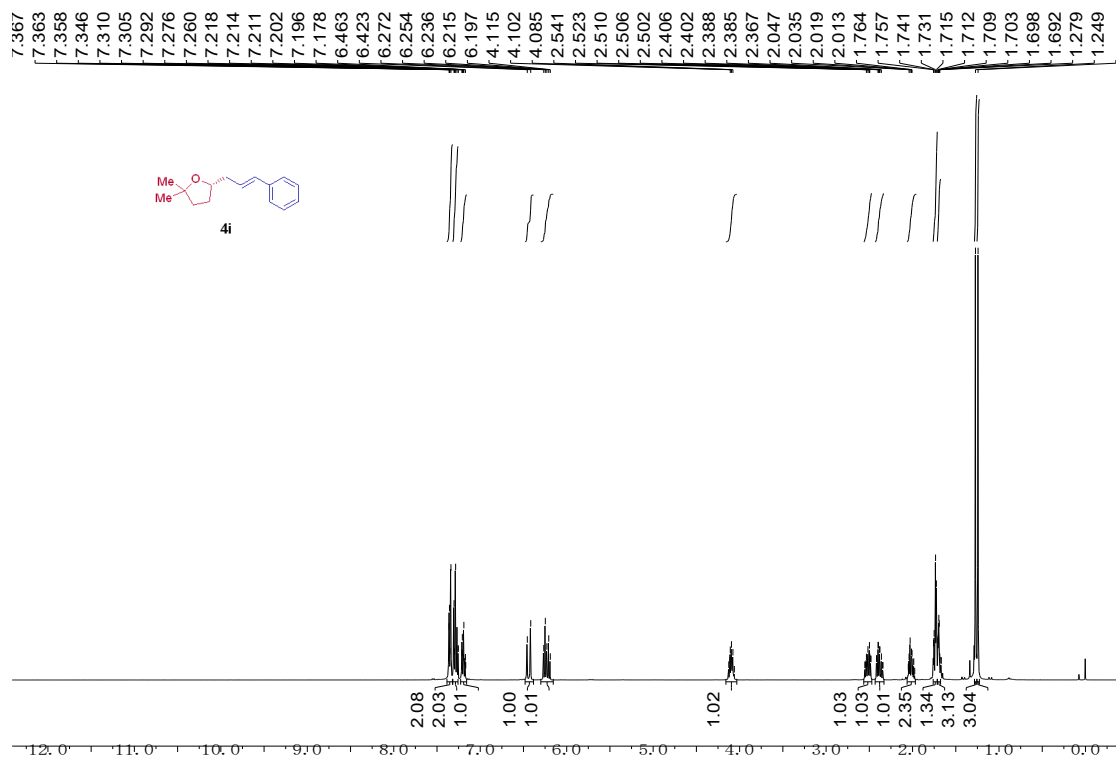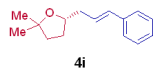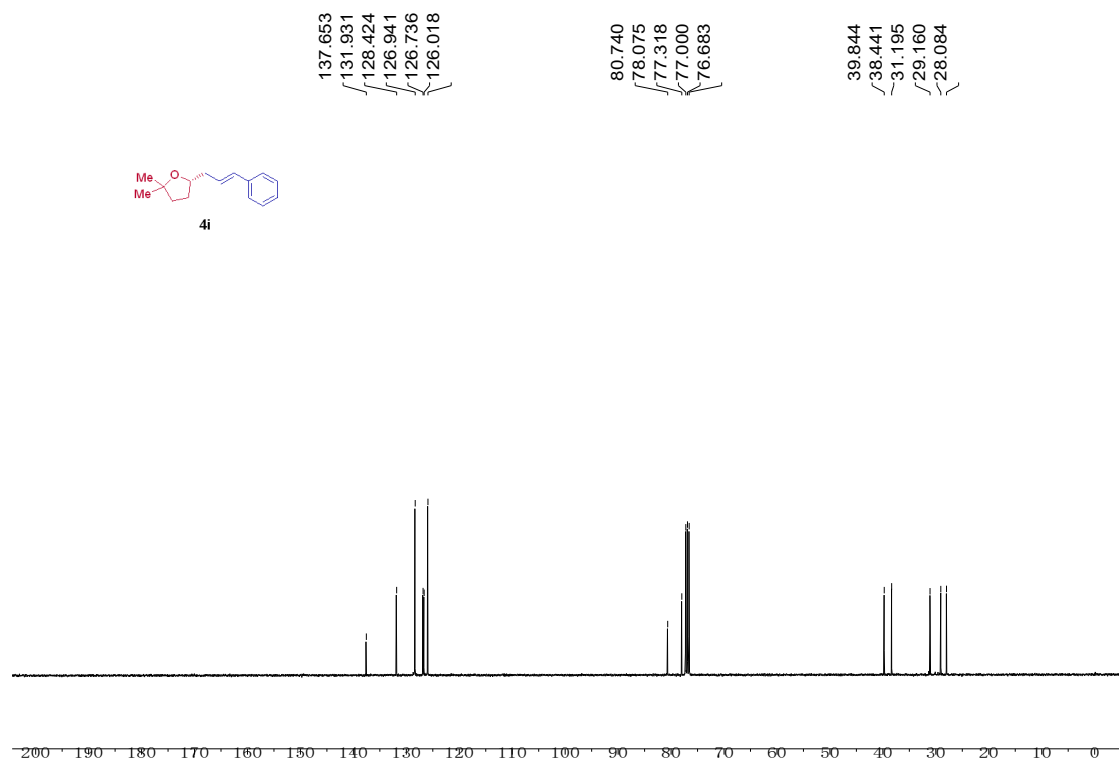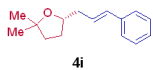

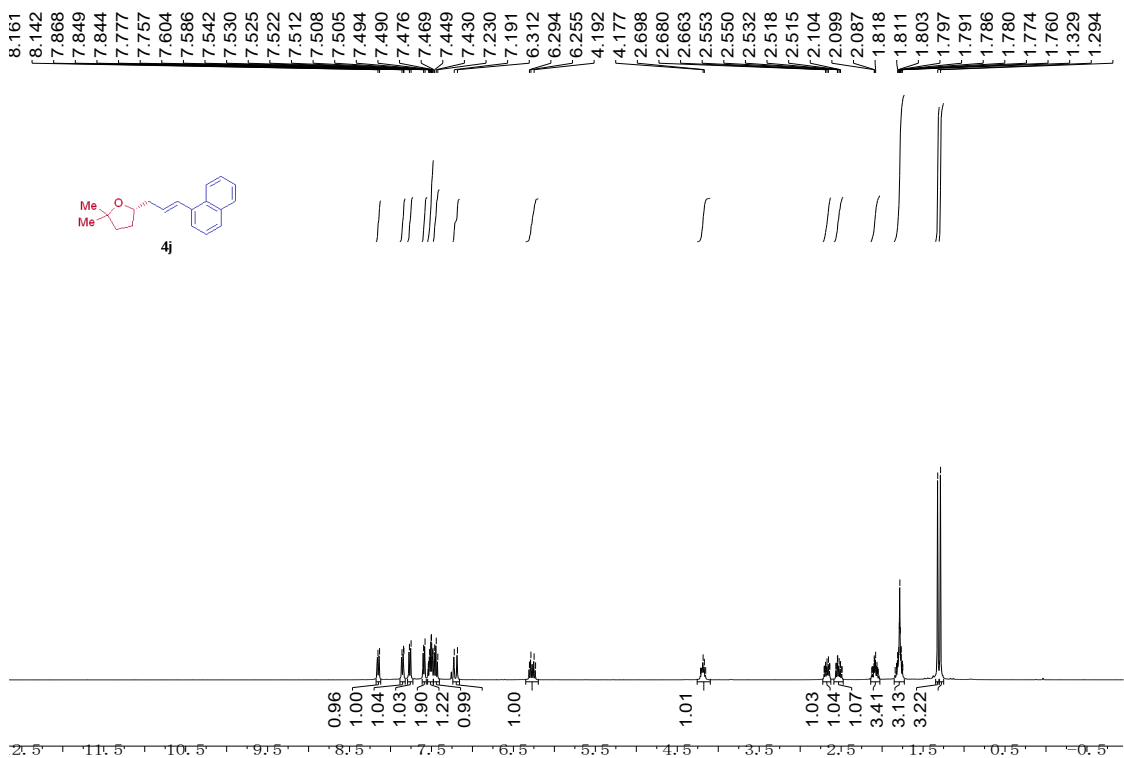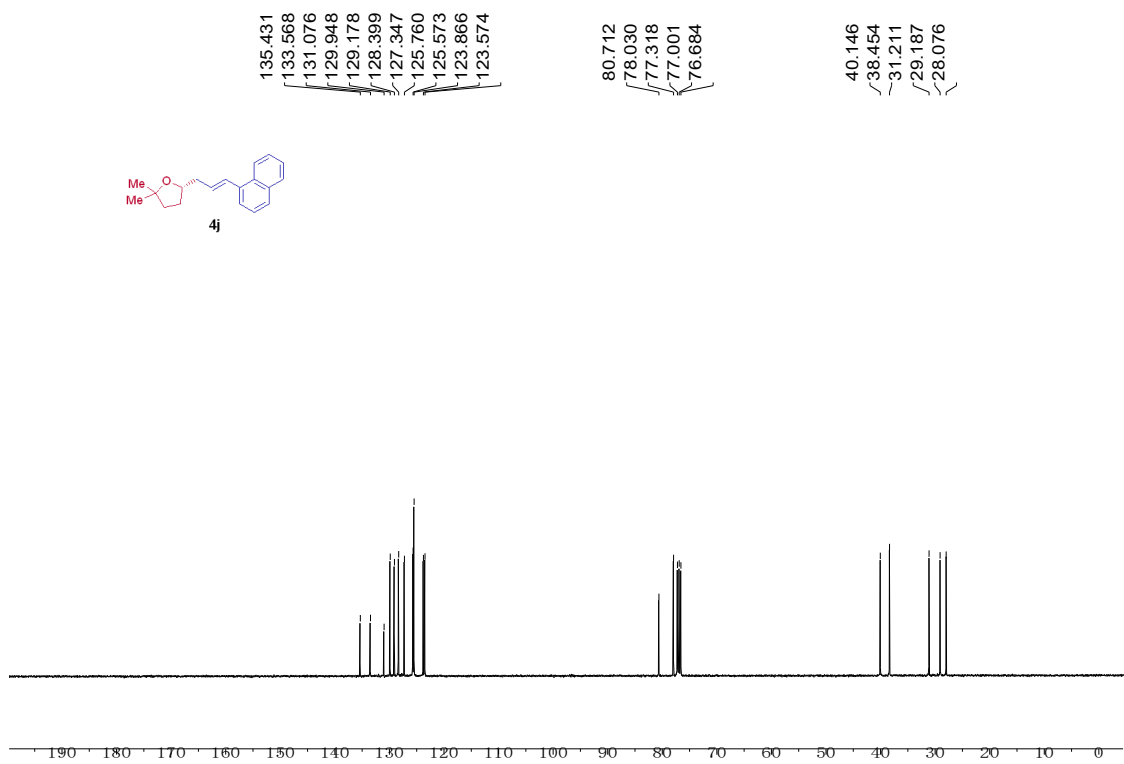

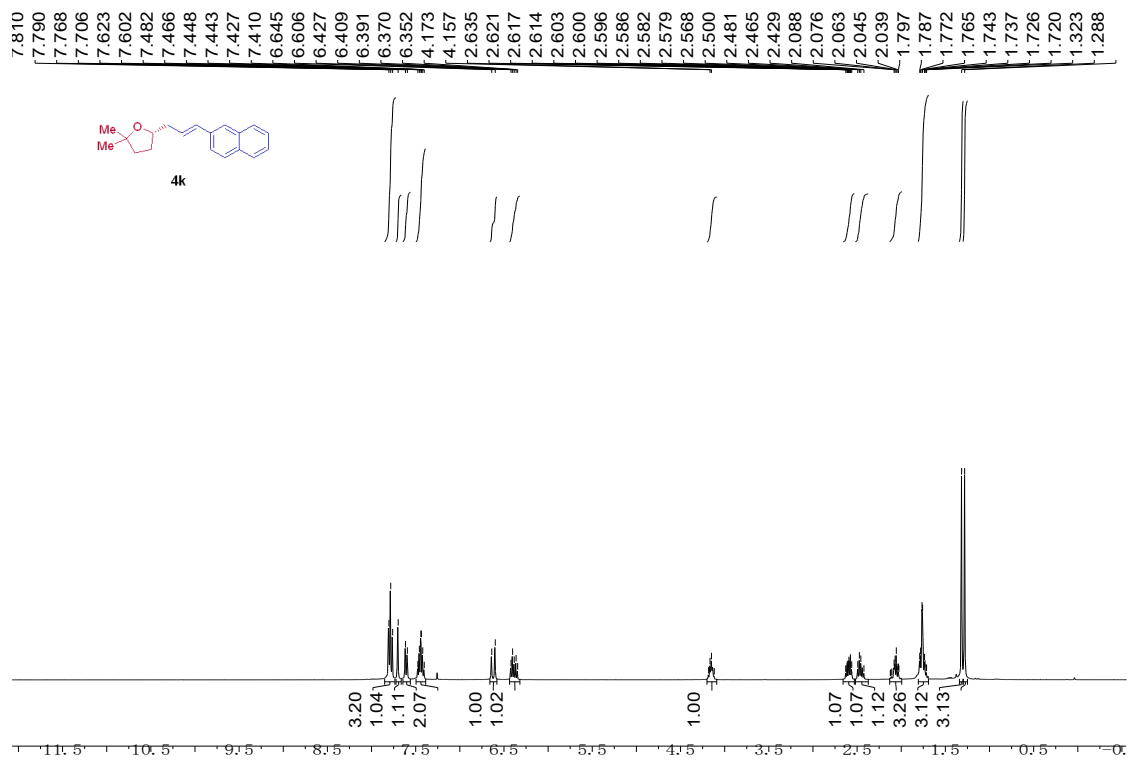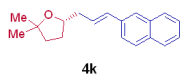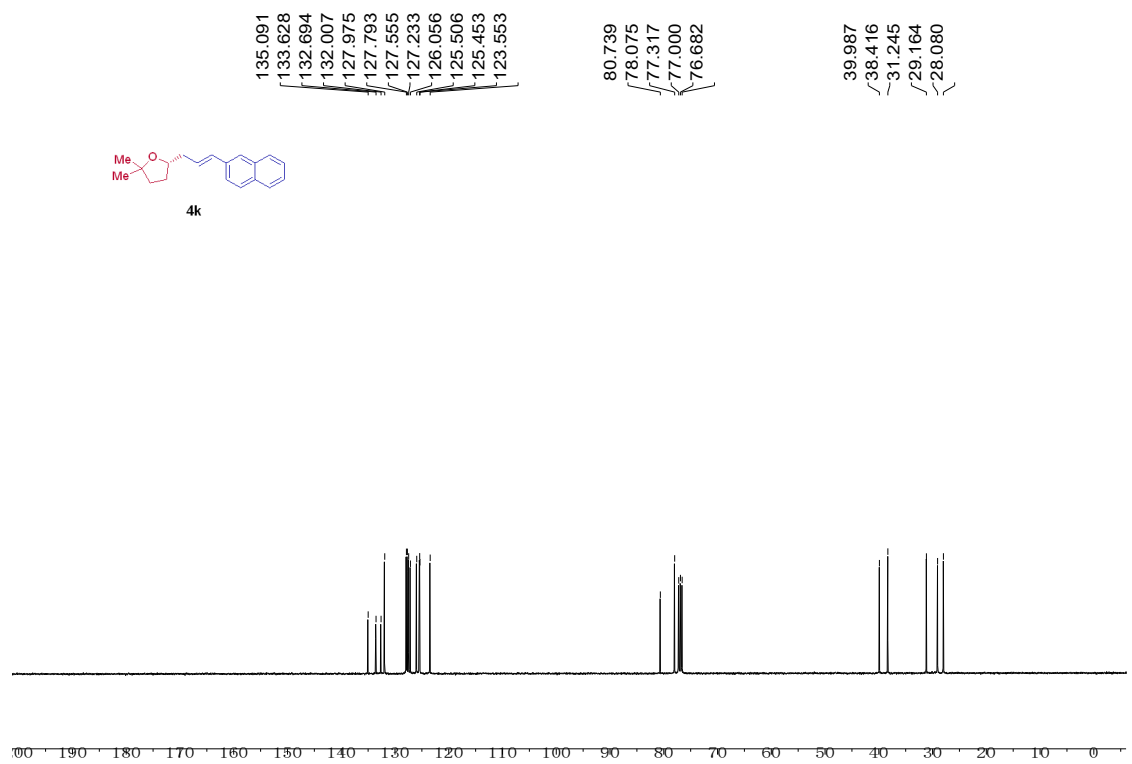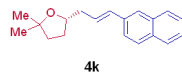

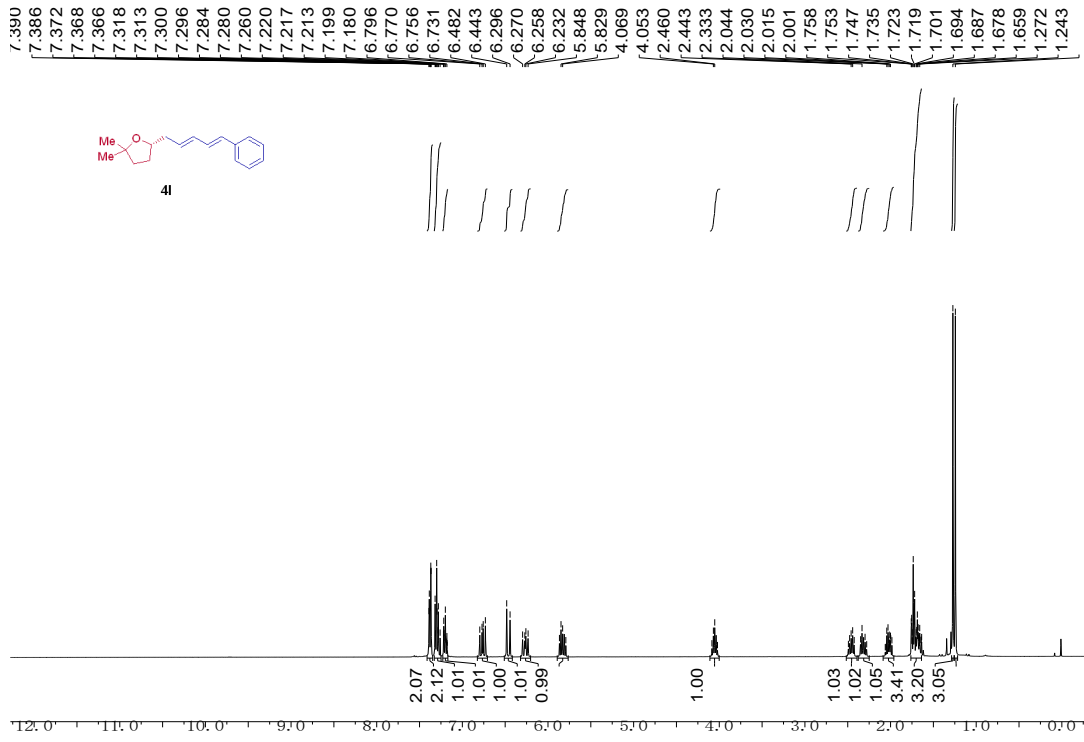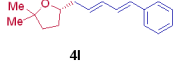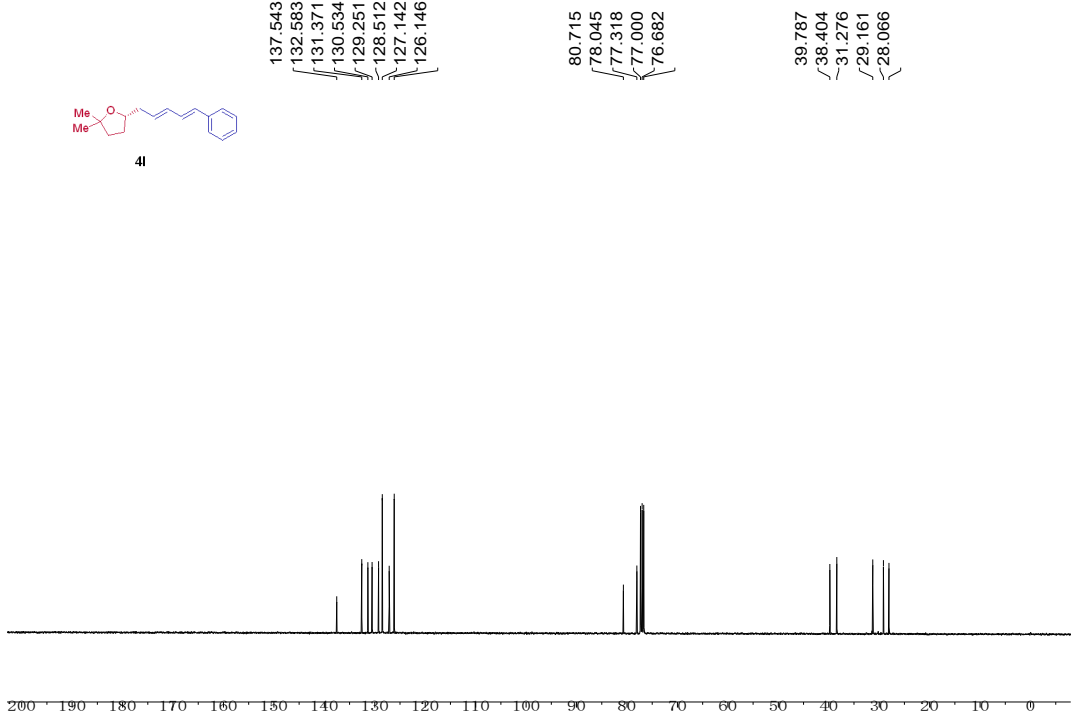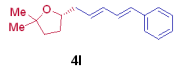



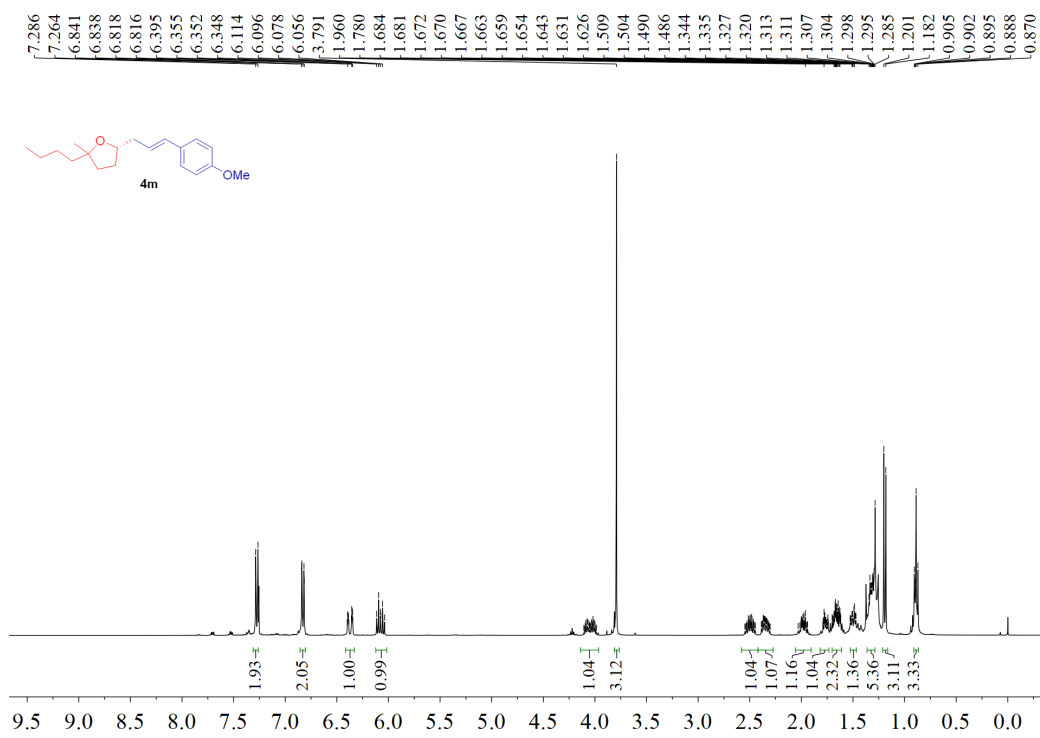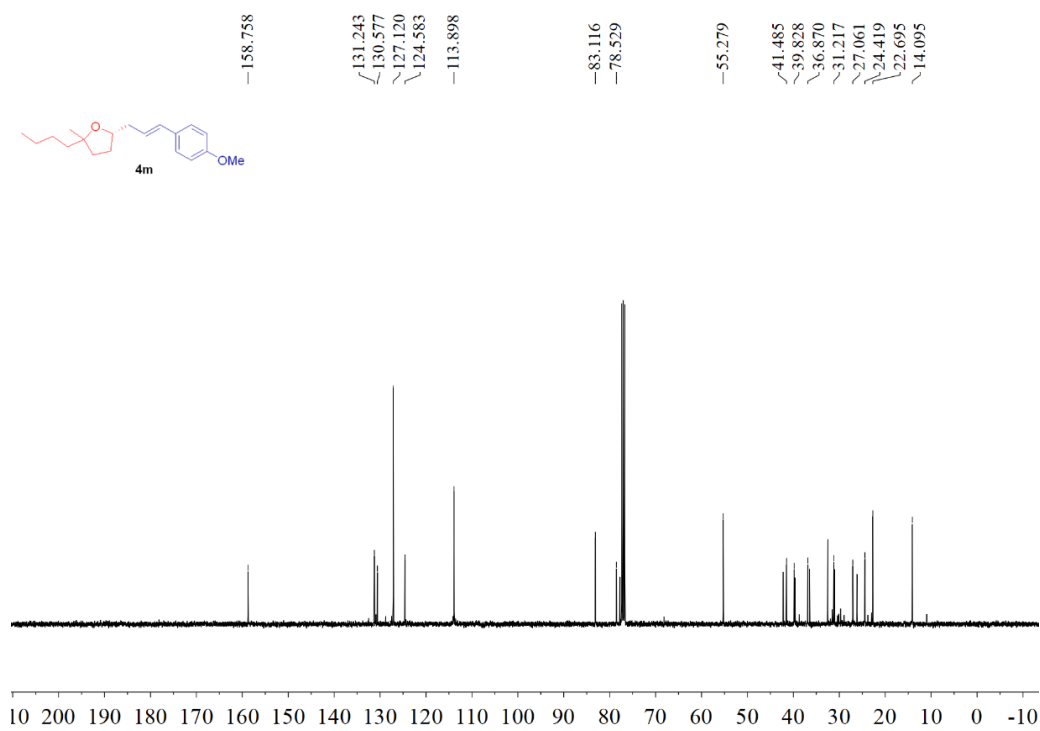

7.290  
7.275  
7.269  
6.846  
6.842  
6.837  
6.829  
6.824  
6.820  
6.400  
6.361  
6.354  
6.096  
6.093  
6.056  
5.857  
5.841  
5.048  
5.044  
5.005  
5.001  
4.948  
4.944  
4.923  
4.919  
3.799  
2.360  
2.121  
1.975  
1.798  
1.718  
1.698  
1.693  
1.689  
1.683  
1.680  
1.675  
1.667  
1.661  
1.657  
1.651  
1.642  
1.634  
1.629  
1.617  
1.598  
1.254  
1.224  
1.206  
1.201

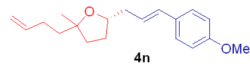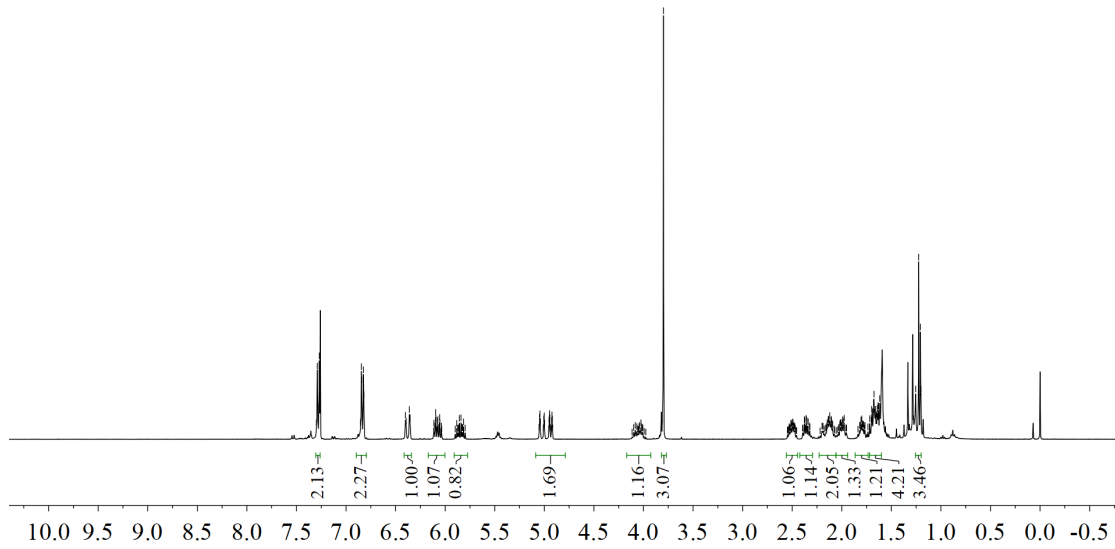

10.0 9.5 9.0 8.5 8.0 7.5 7.0 6.5 6.0 5.5 5.0 4.5 4.0 3.5 3.0 2.5 2.0 1.5 1.0 0.5 0.0 -0.5

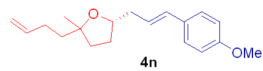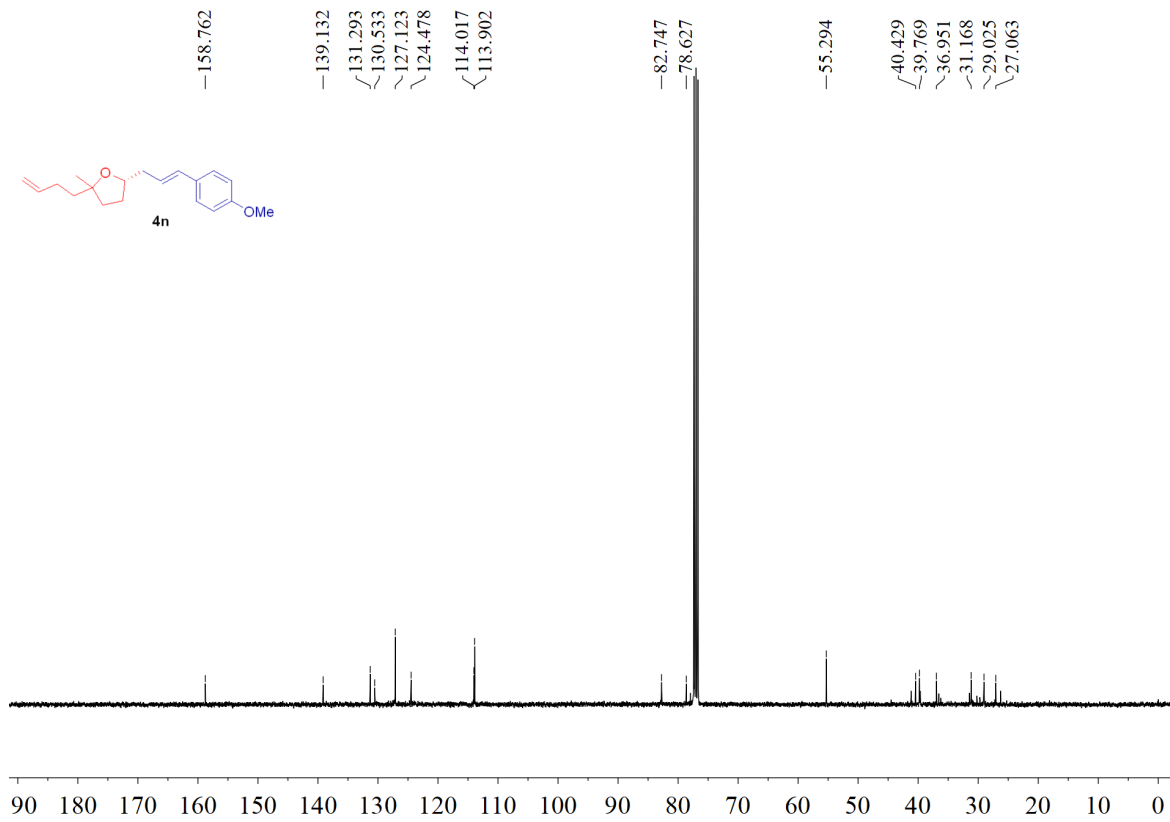

90 180 170 160 150 140 130 120 110 100 90 80 70 60 50 40 30 20 10 0

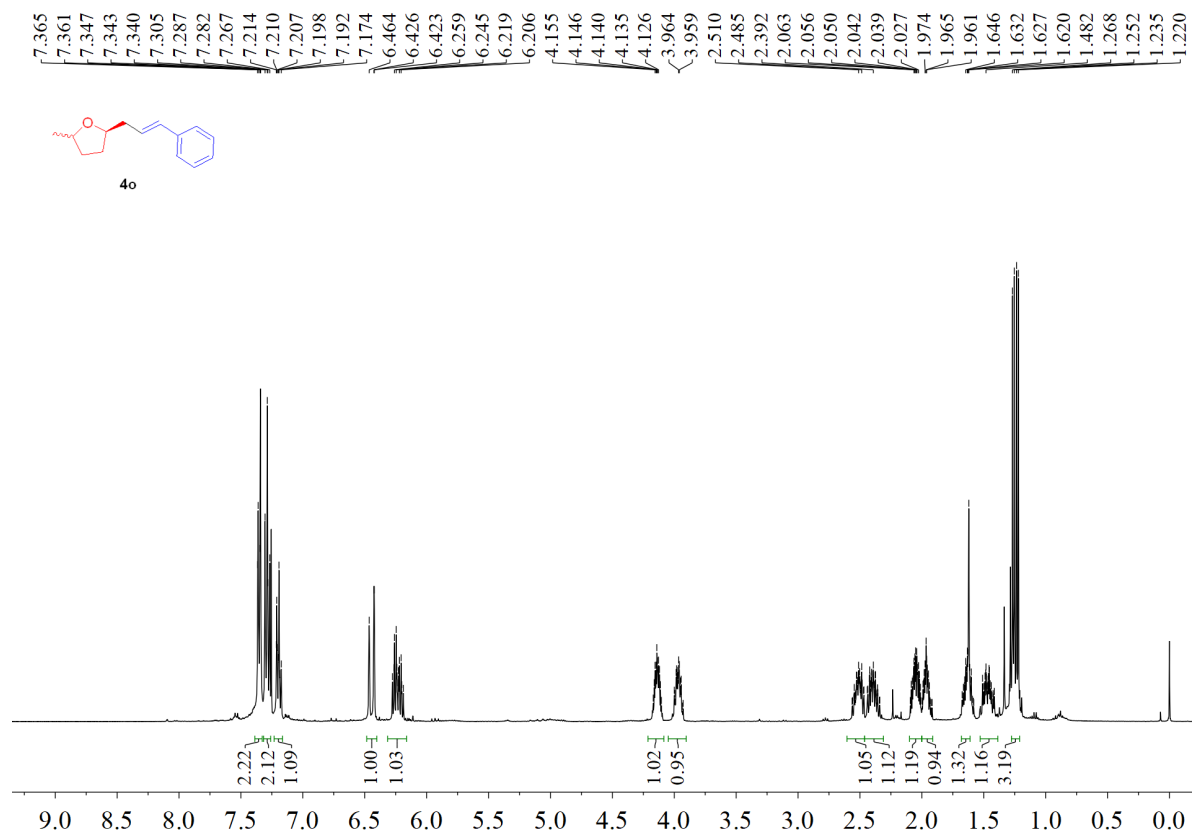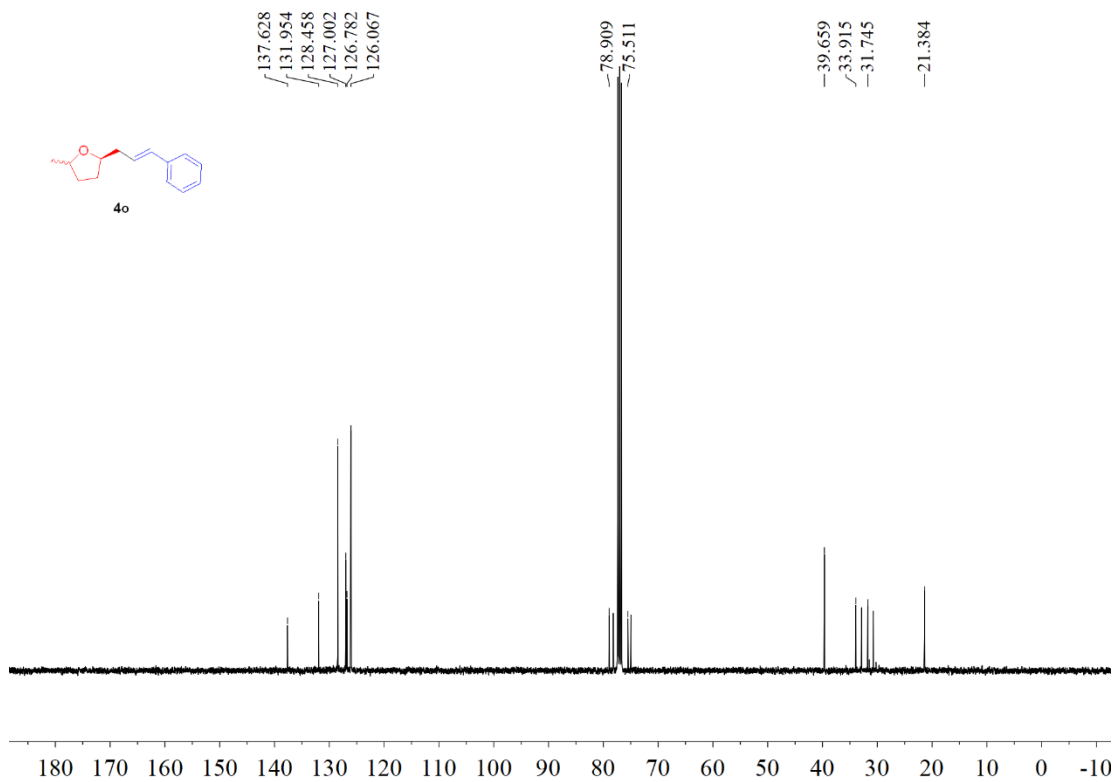

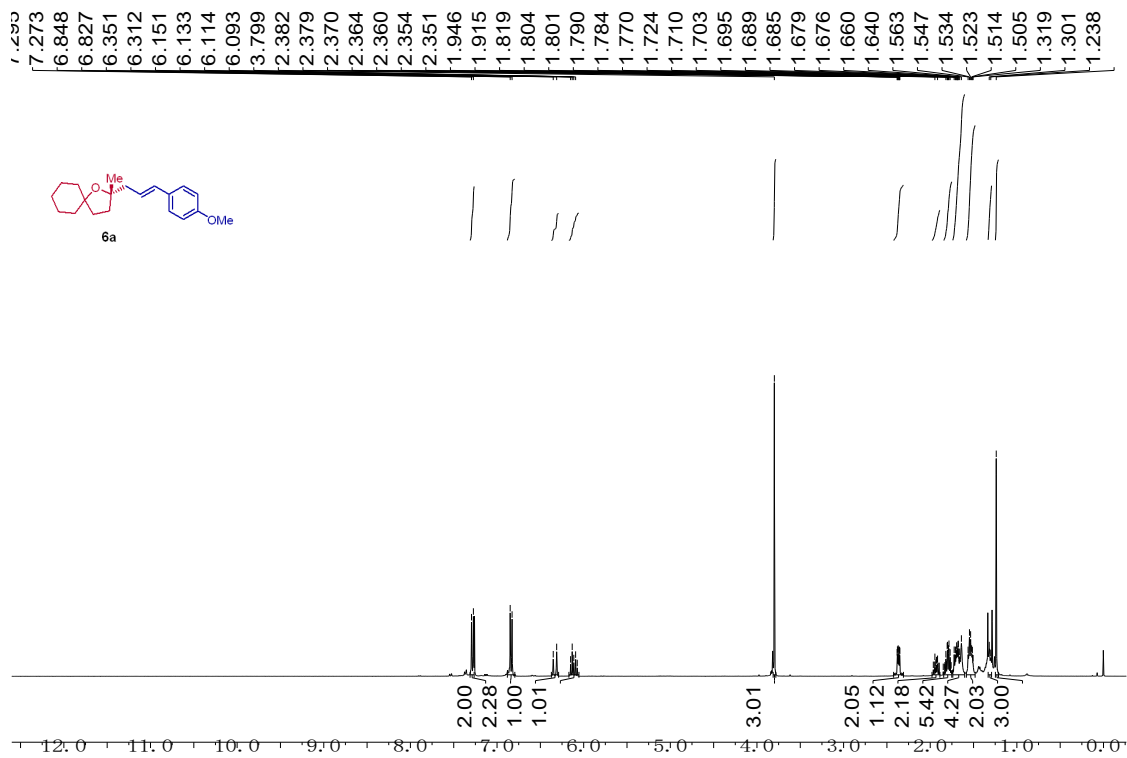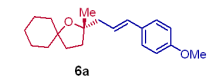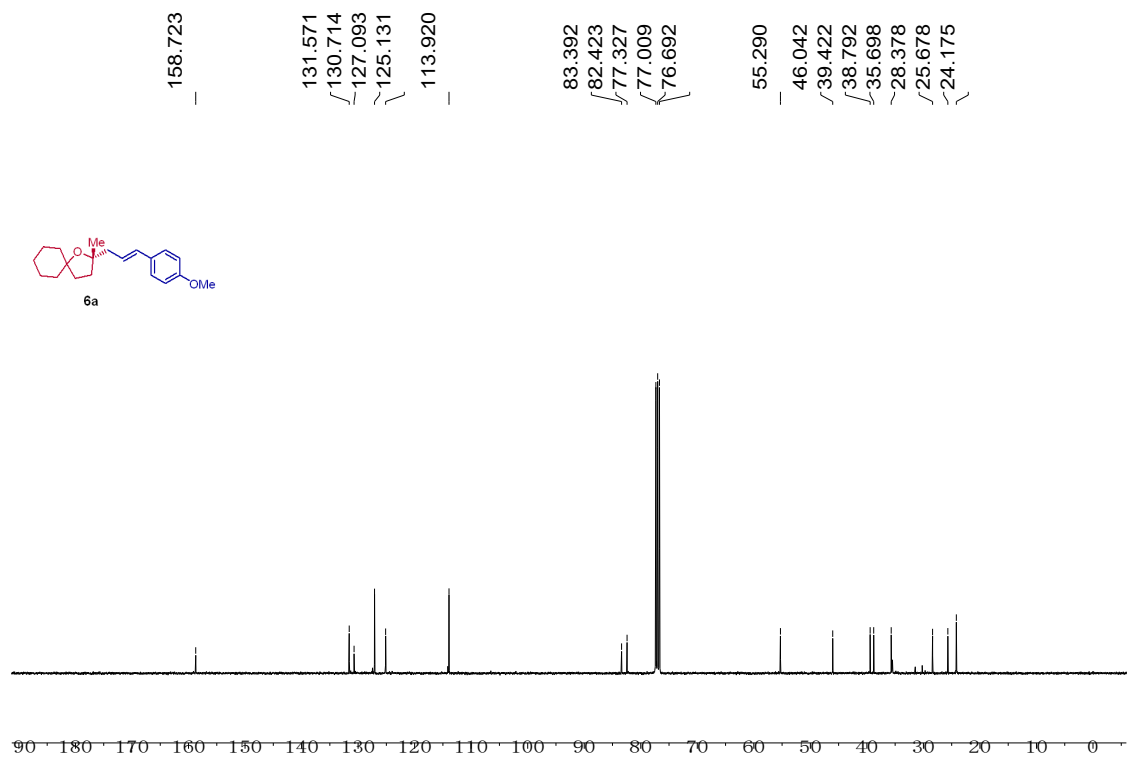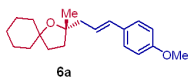

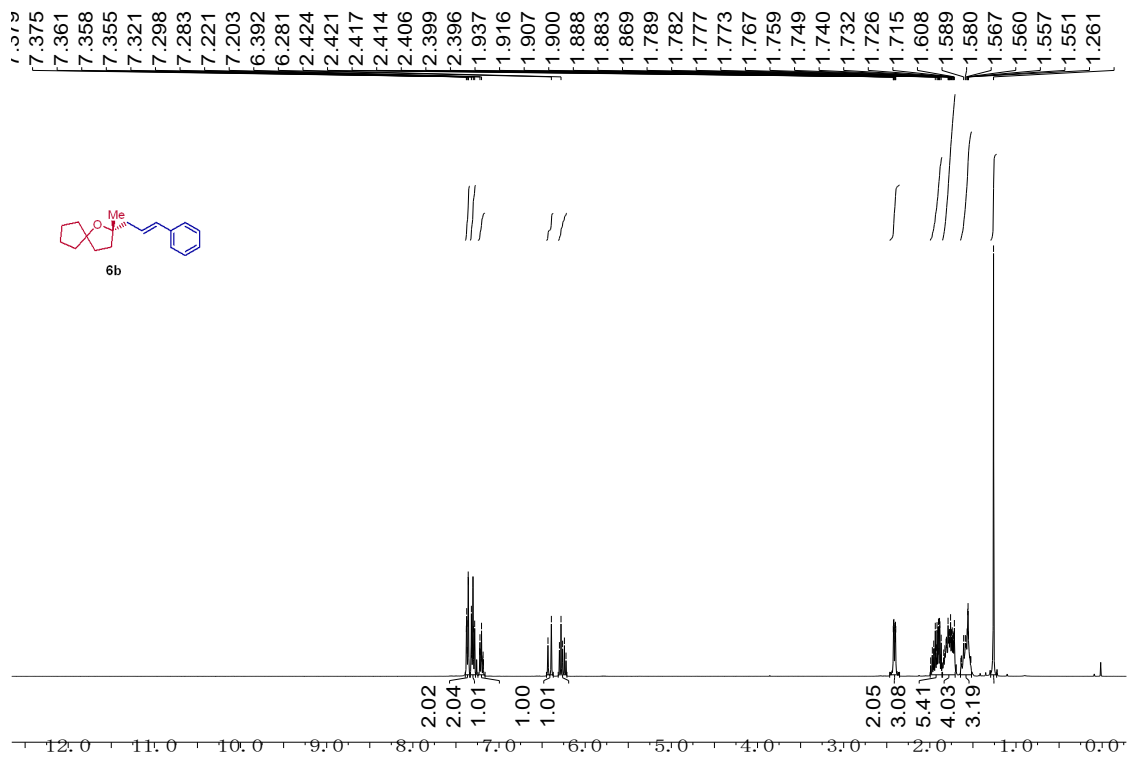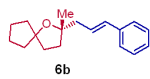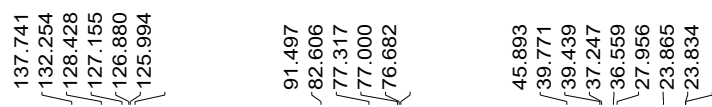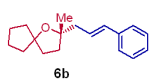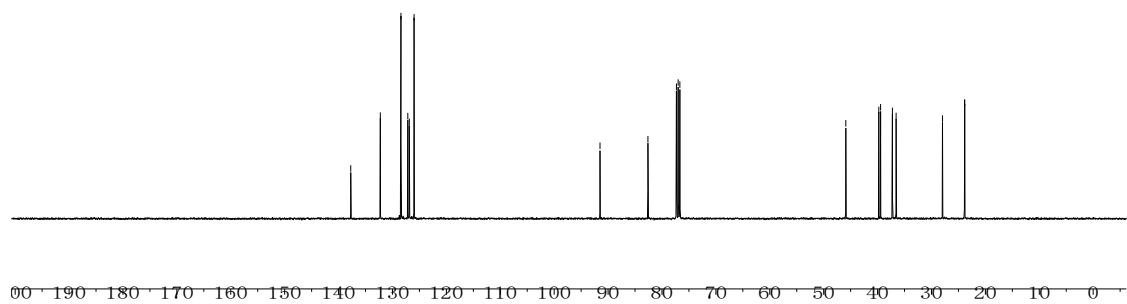

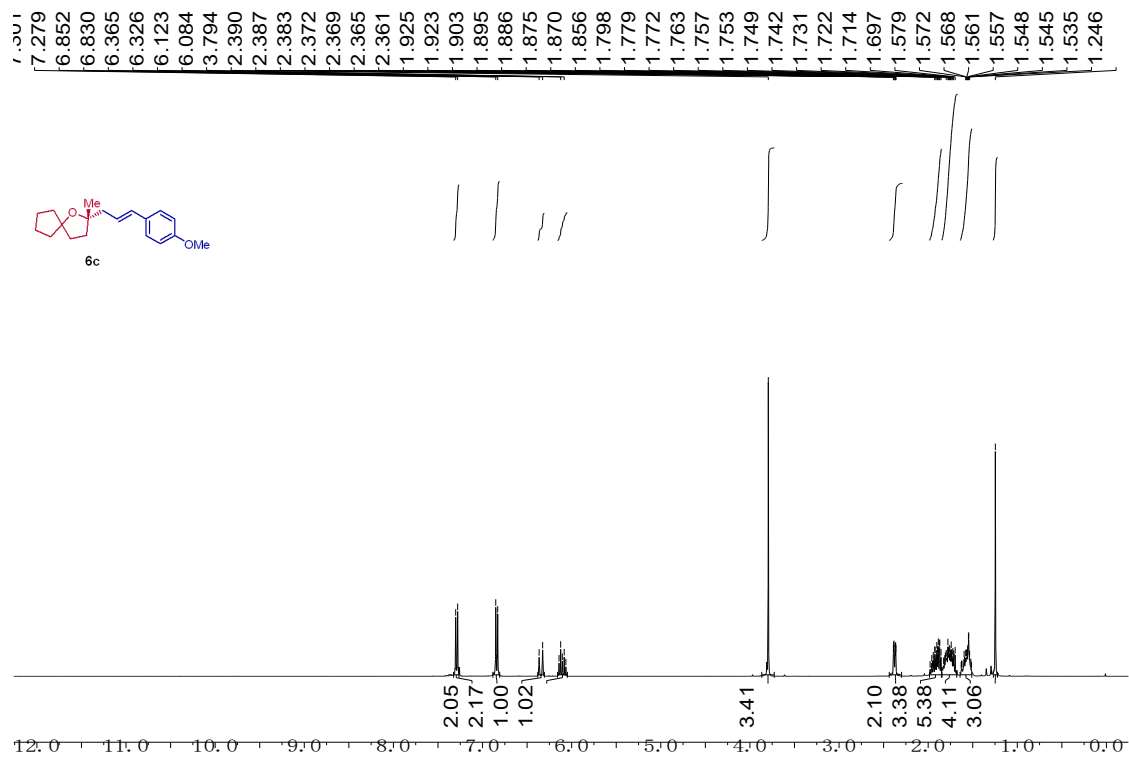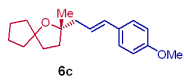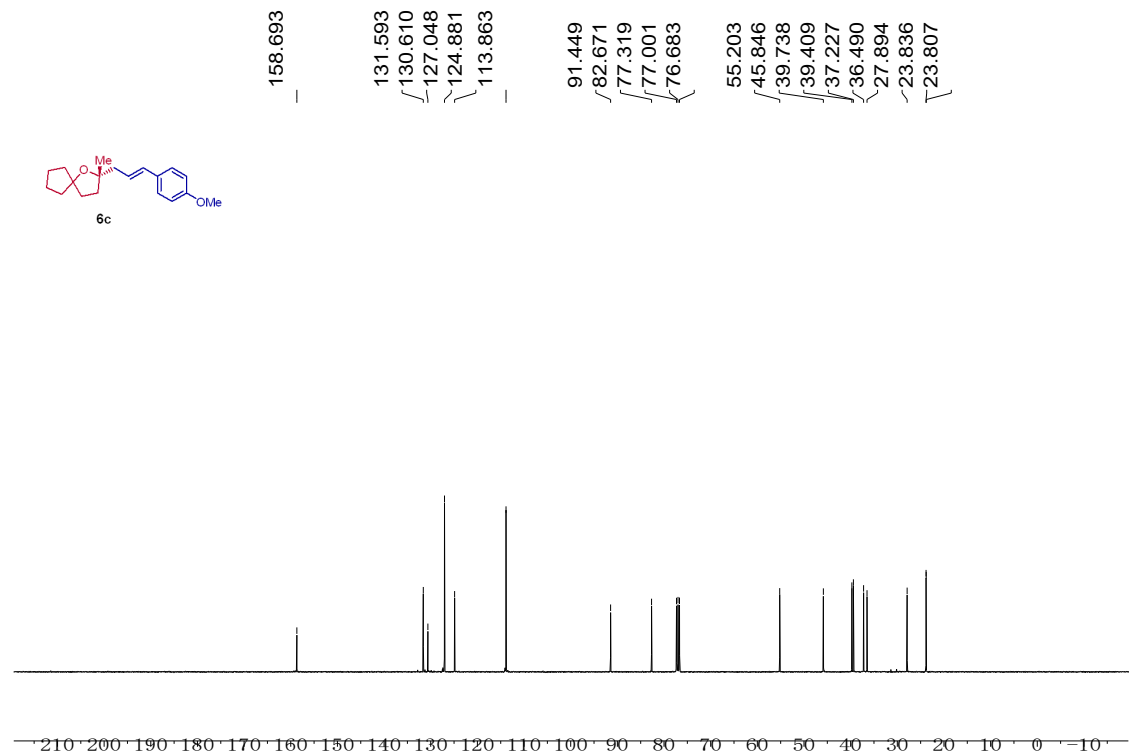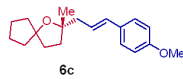

7.452  
7.438  
7.433  
7.191  
6.937  
6.918  
6.871  
6.850  
6.759  
6.719  
6.275  
6.235  
3.841  
2.452  
2.448  
2.440  
2.436  
2.430  
2.421  
2.417  
1.944  
1.915  
1.910  
1.897  
1.894  
1.881  
1.875  
1.839  
1.832  
1.791  
1.784  
1.780  
1.775  
1.765  
1.749  
1.734  
1.730  
1.721  
1.704  
1.590  
1.581  
1.564  
1.552  
1.267

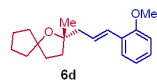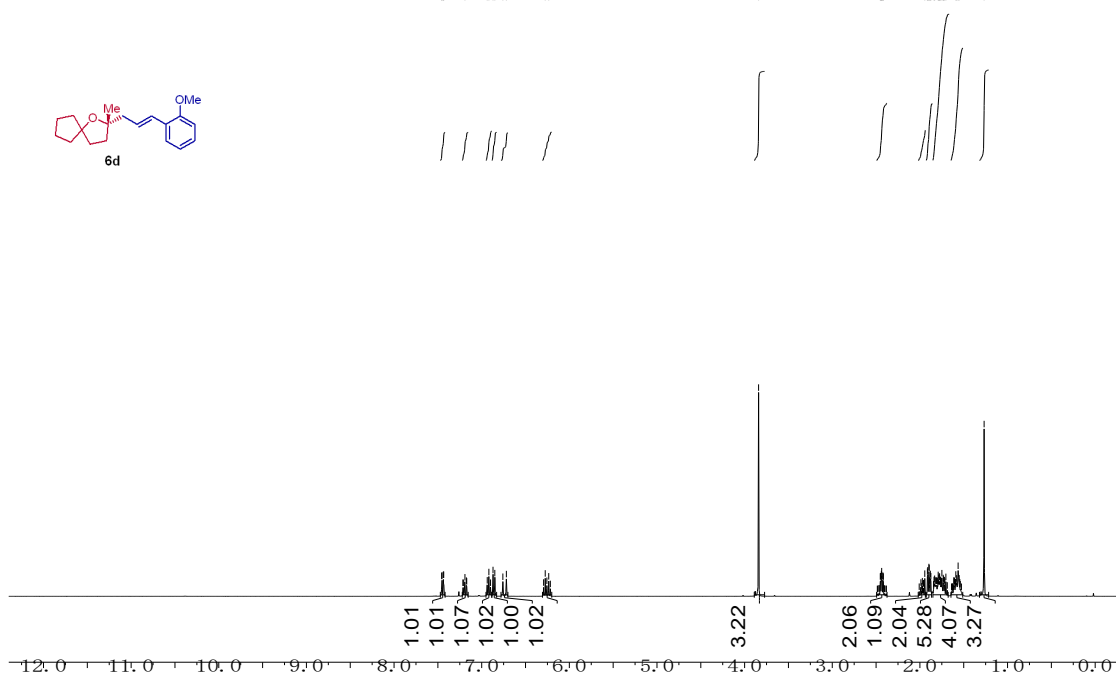

156.291  
127.849  
127.711  
126.799  
126.765  
126.370  
120.563  
110.811  
91.414  
82.689  
77.319  
77.001  
76.683  
55.396  
46.268  
39.762  
39.401  
37.235  
36.437  
27.971  
23.851  
23.813

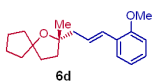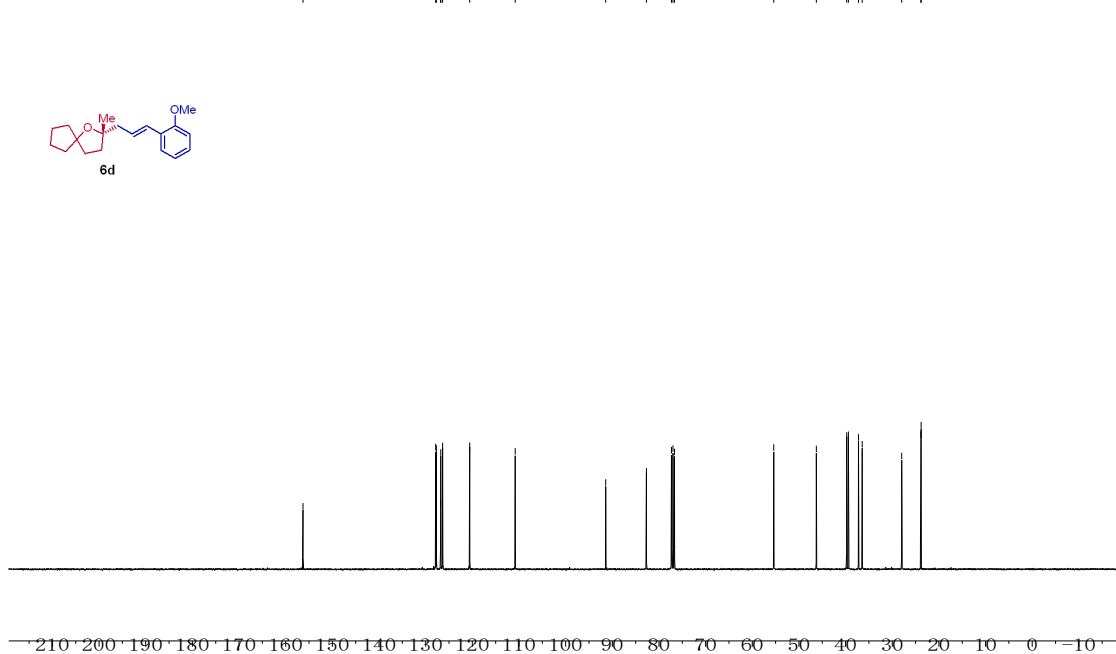

7.324  
7.317  
7.308  
7.300  
7.292  
7.287  
6.996  
6.975  
6.969  
6.953  
6.375  
6.336  
6.179  
6.160  
6.139  
2.388  
2.370  
1.927  
1.924  
1.911  
1.904  
1.898  
1.889  
1.873  
1.870  
1.851  
1.792  
1.788  
1.773  
1.767  
1.763  
1.750  
1.741  
1.732  
1.725  
1.719  
1.716  
1.709  
1.596  
1.588  
1.576  
1.565  
1.562  
1.539  
1.241

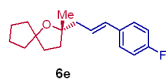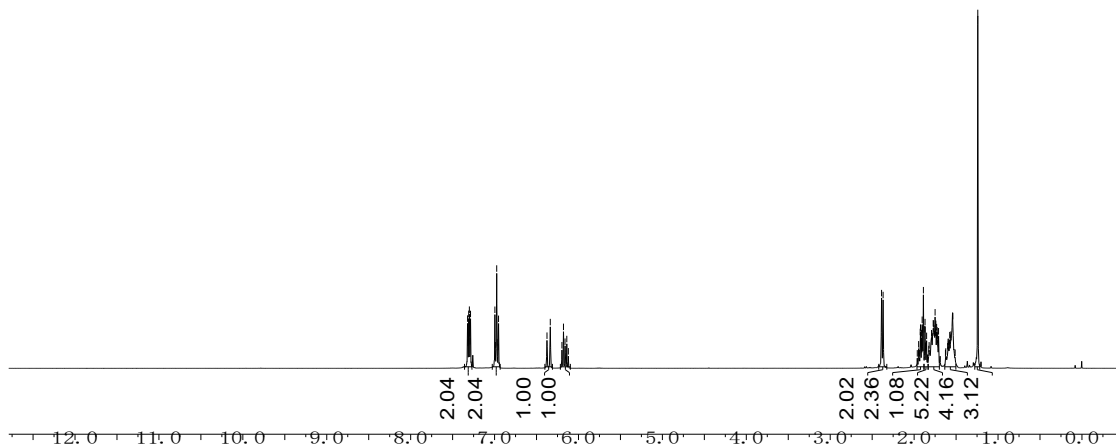

163.126  
160.684  
133.902  
133.869  
131.054  
127.417  
127.339  
126.893  
126.871  
115.358  
115.144  
91.525  
82.543  
77.318  
77.000  
76.682  
45.785  
39.736  
39.428  
37.216  
36.624  
27.894  
23.844  
23.817

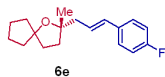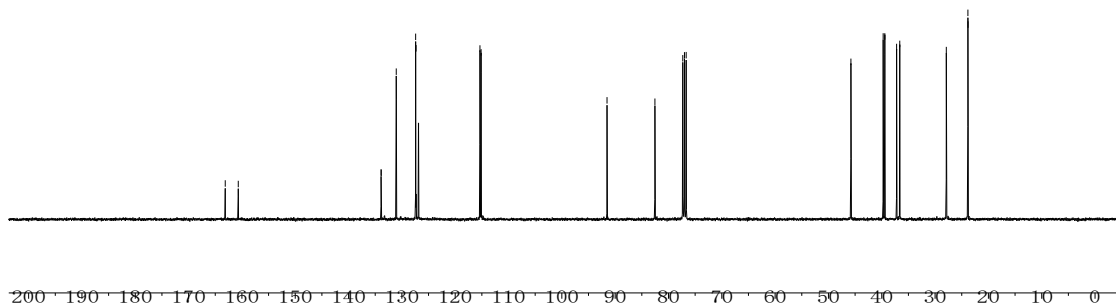



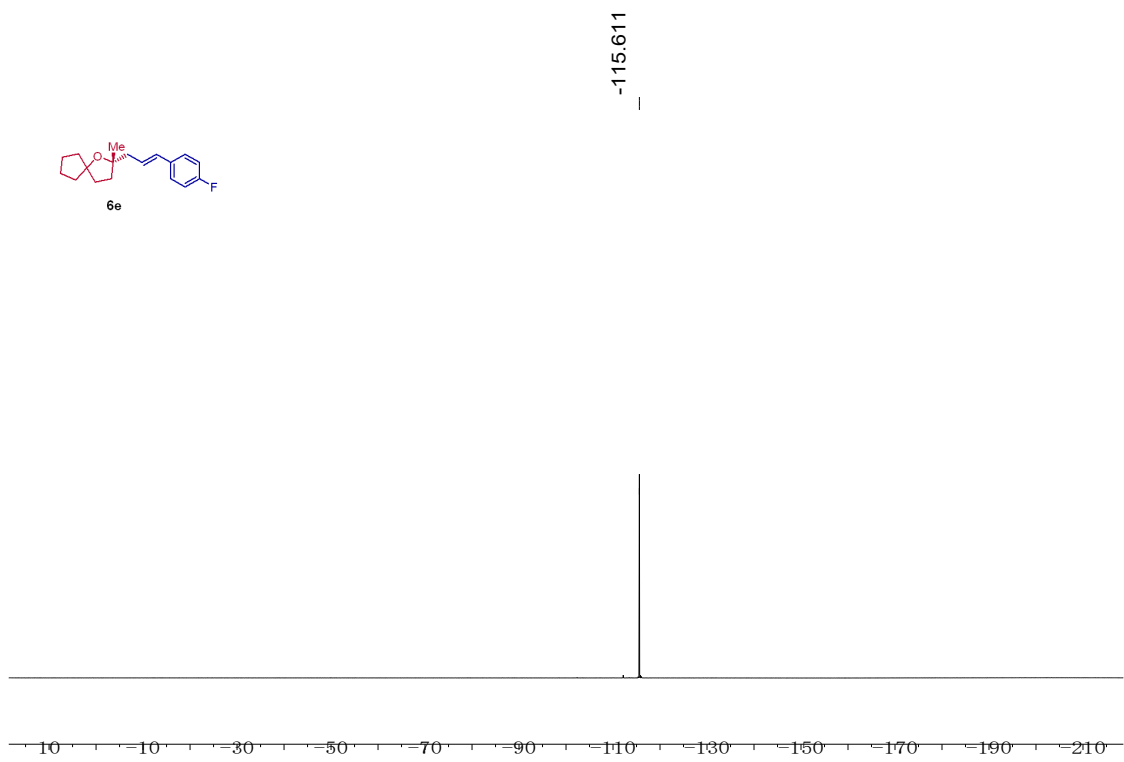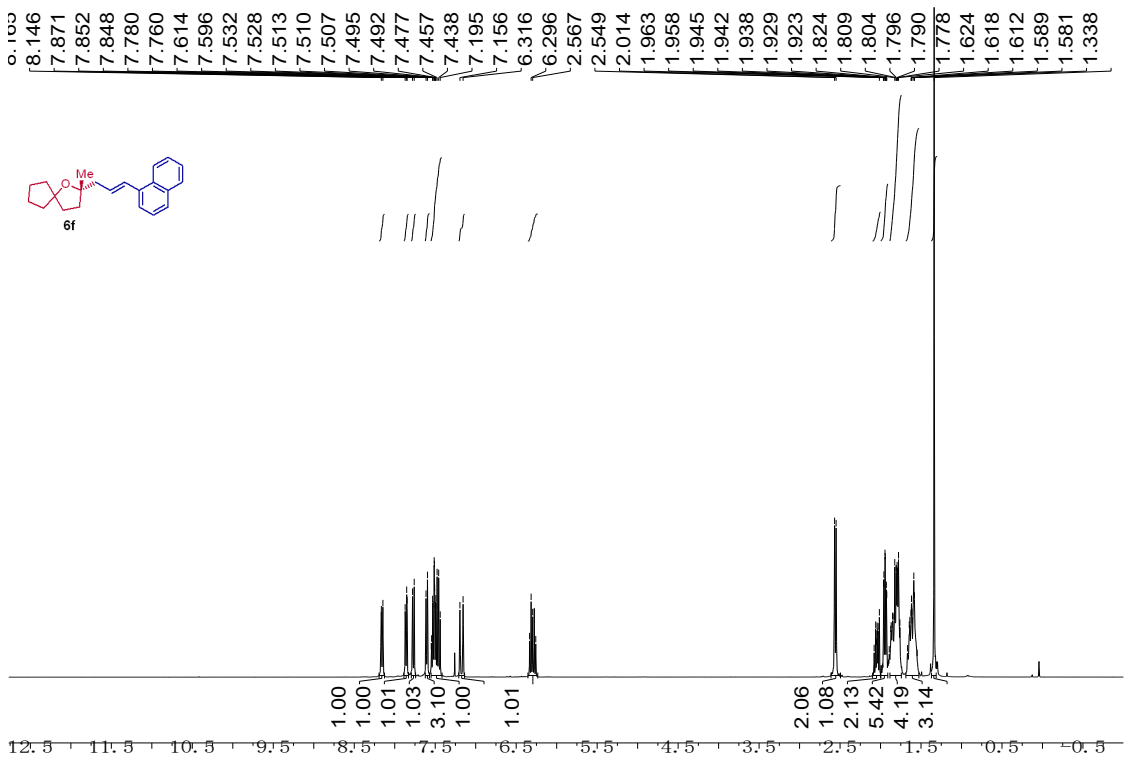

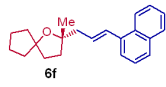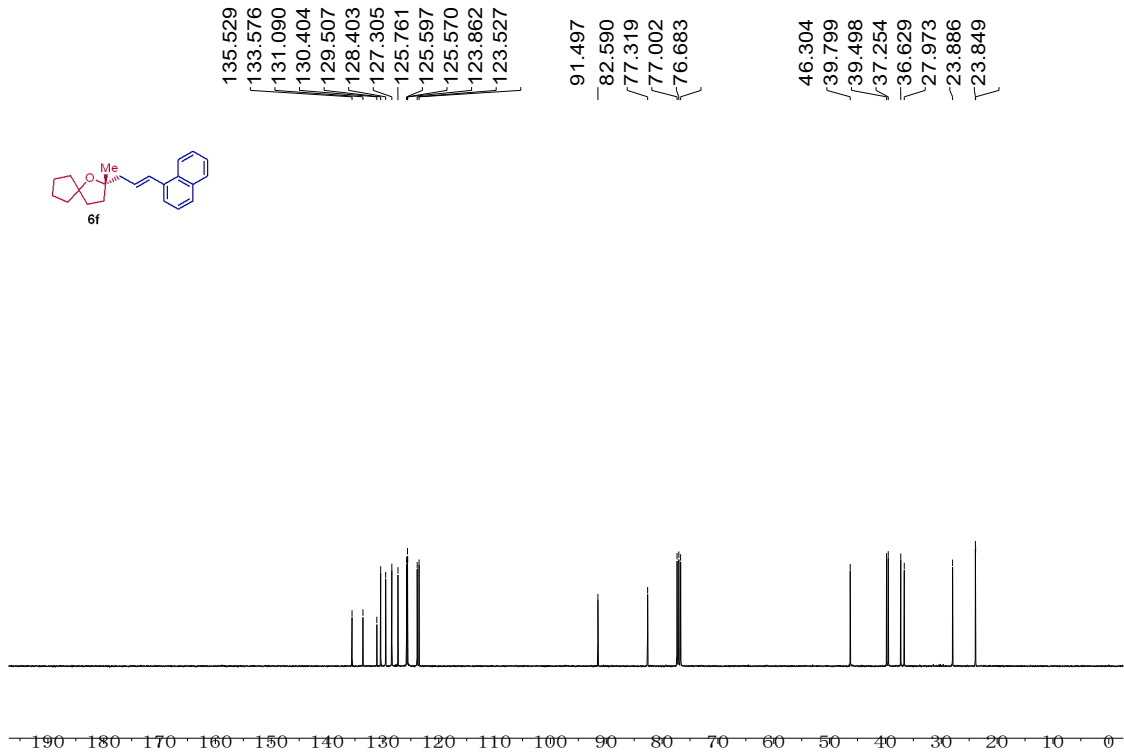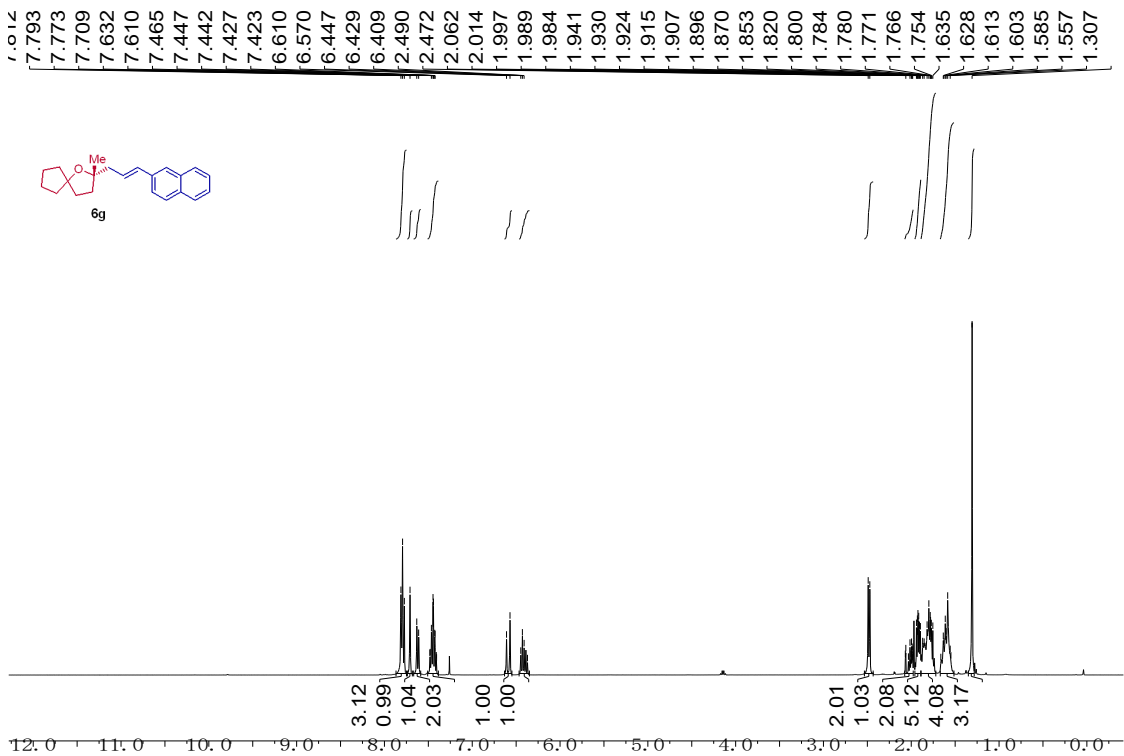

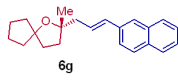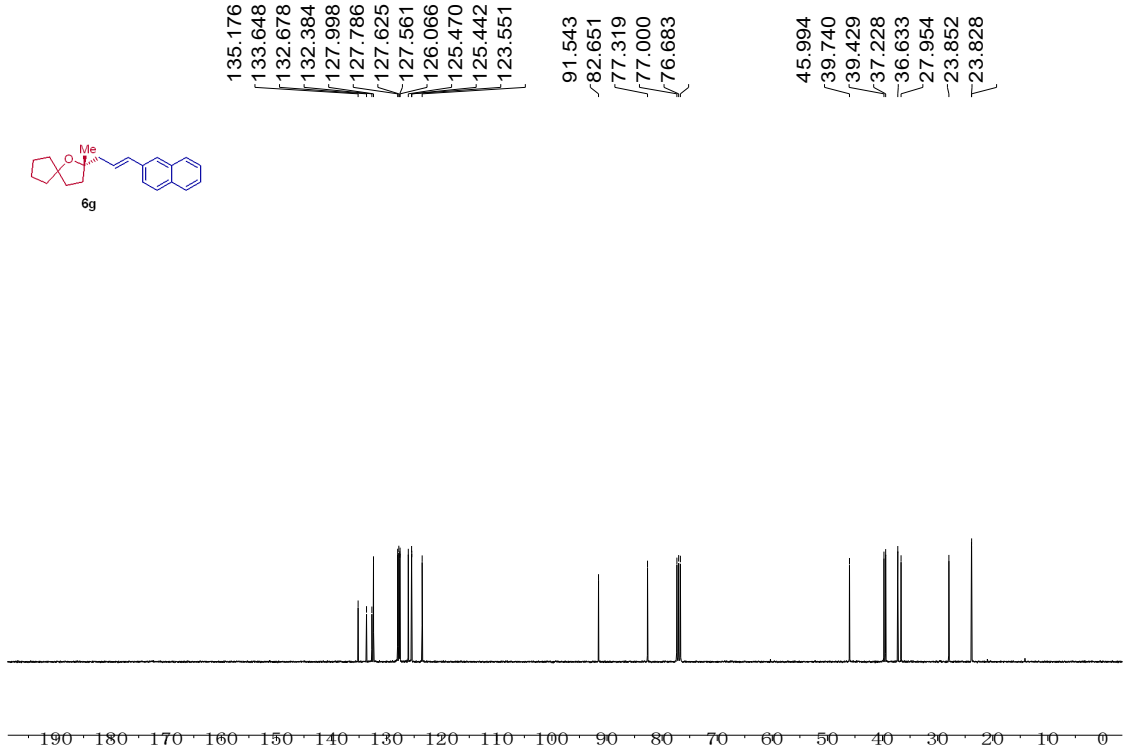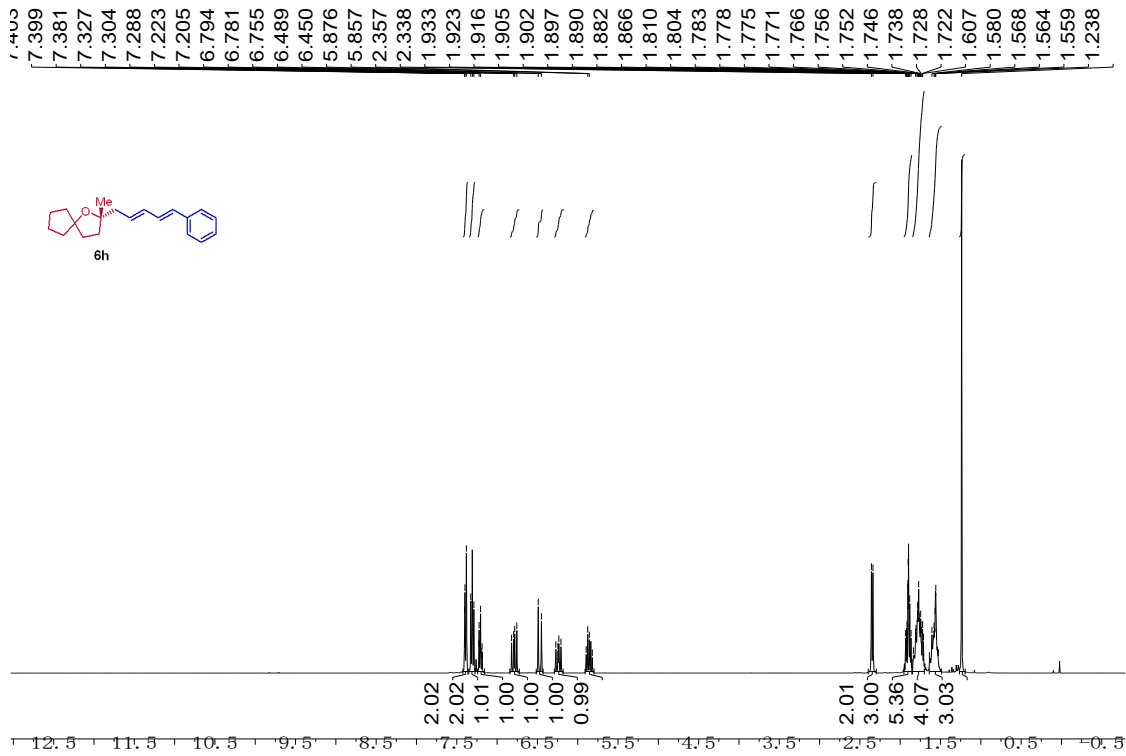

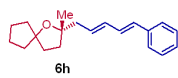

137.543  
133.005  
131.782  
130.393  
129.293  
128.483  
127.091  
126.107

91.437  
82.564  
77.318  
76.999  
76.682

45.788  
39.733  
39.437  
37.181  
36.698  
27.758  
23.851  
23.832

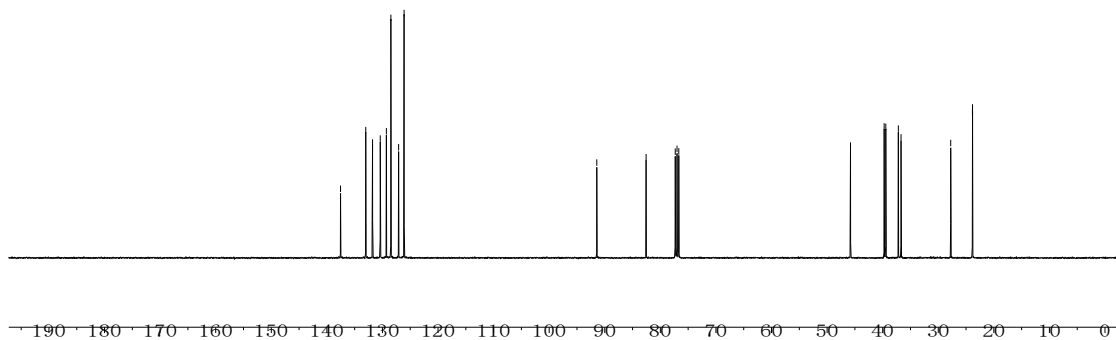

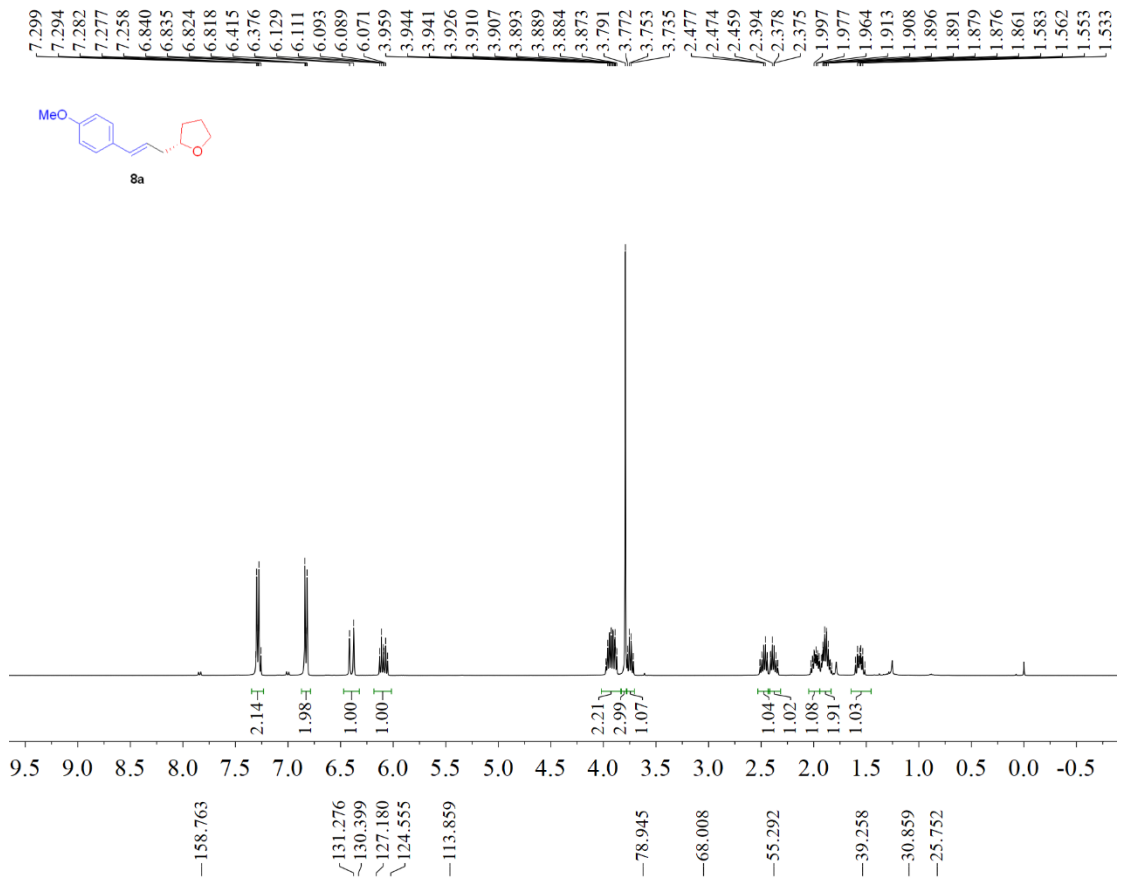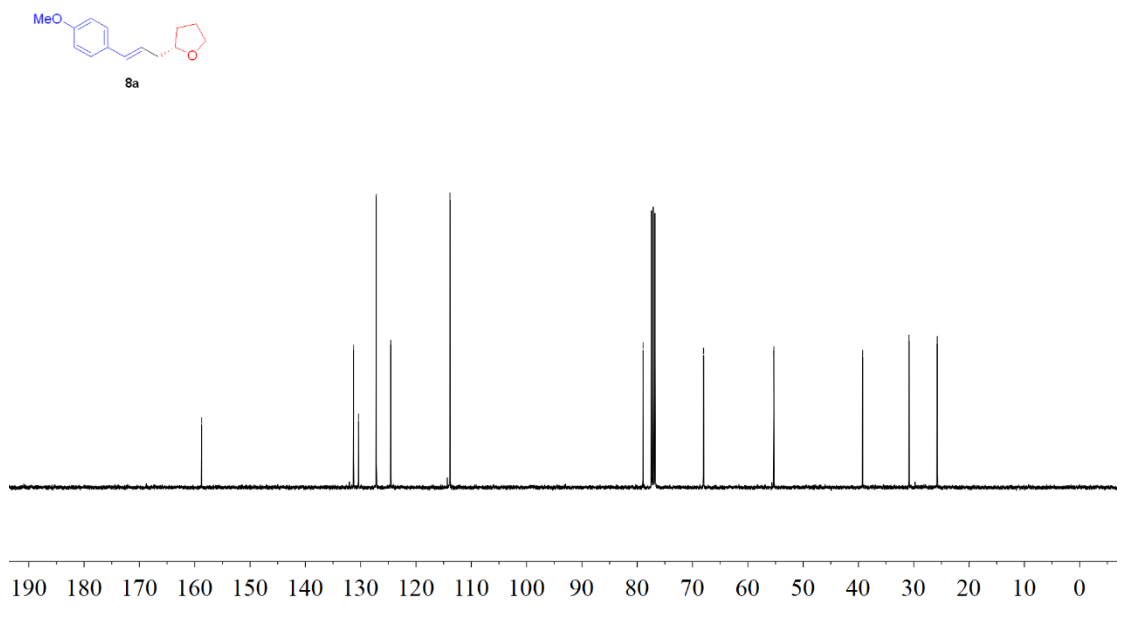

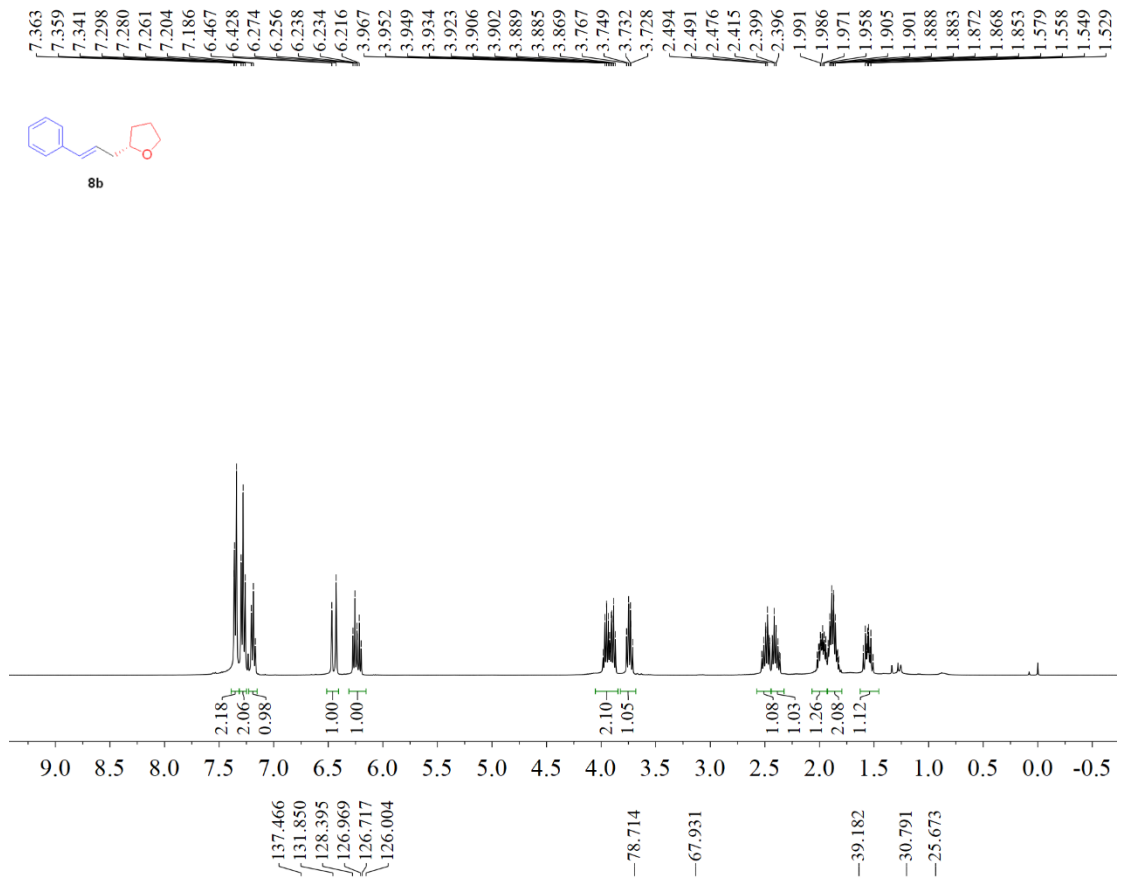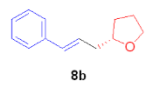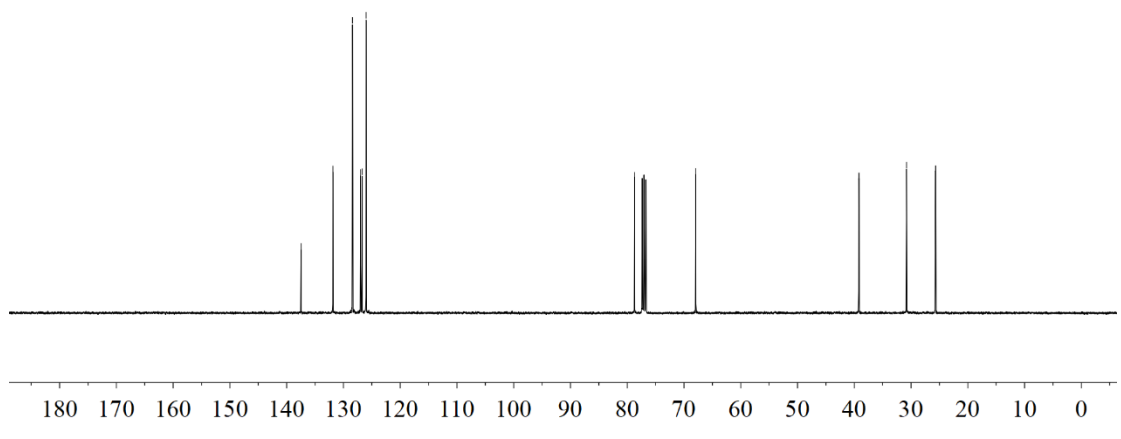

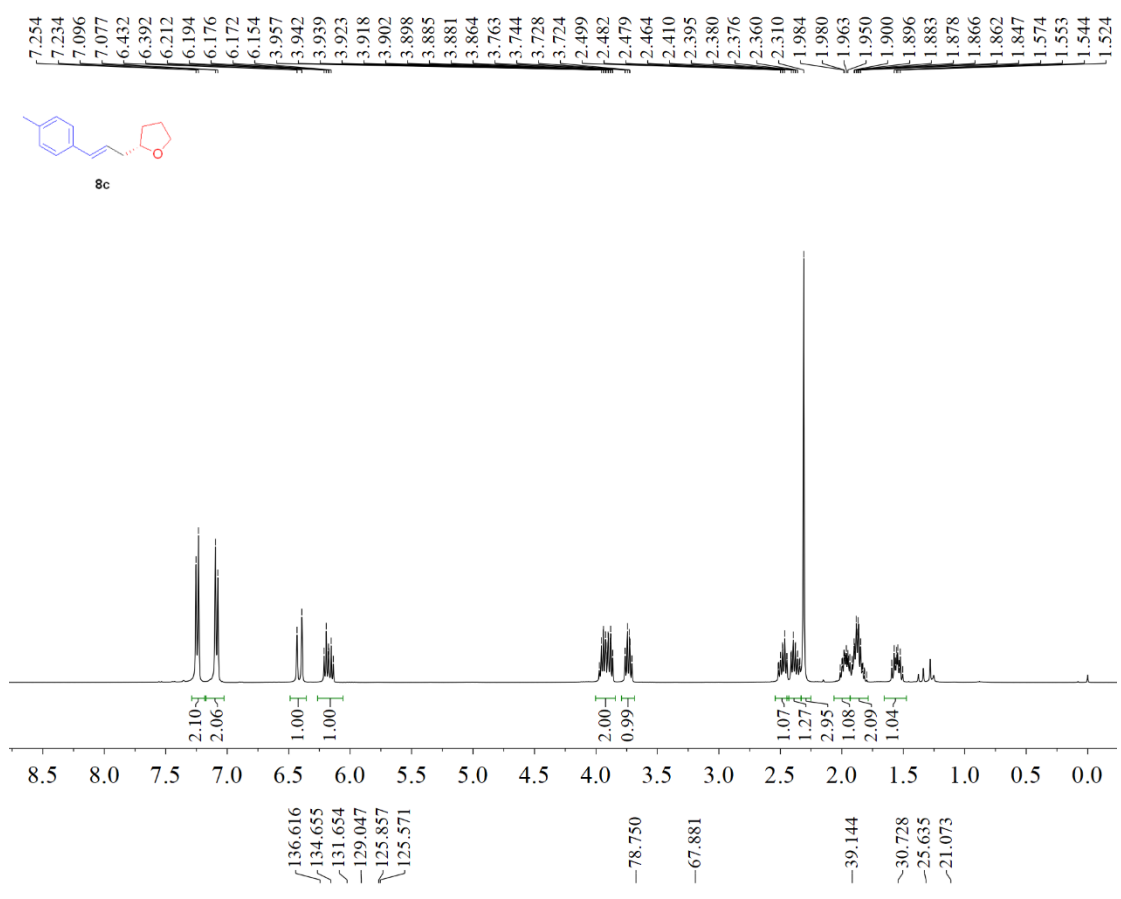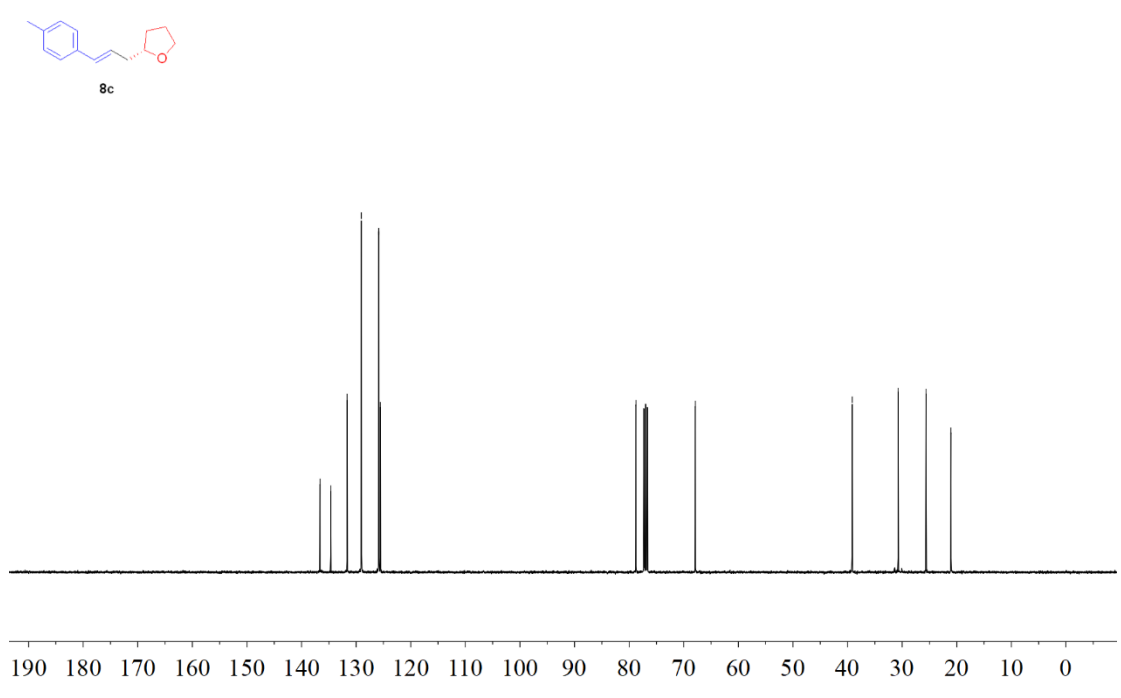

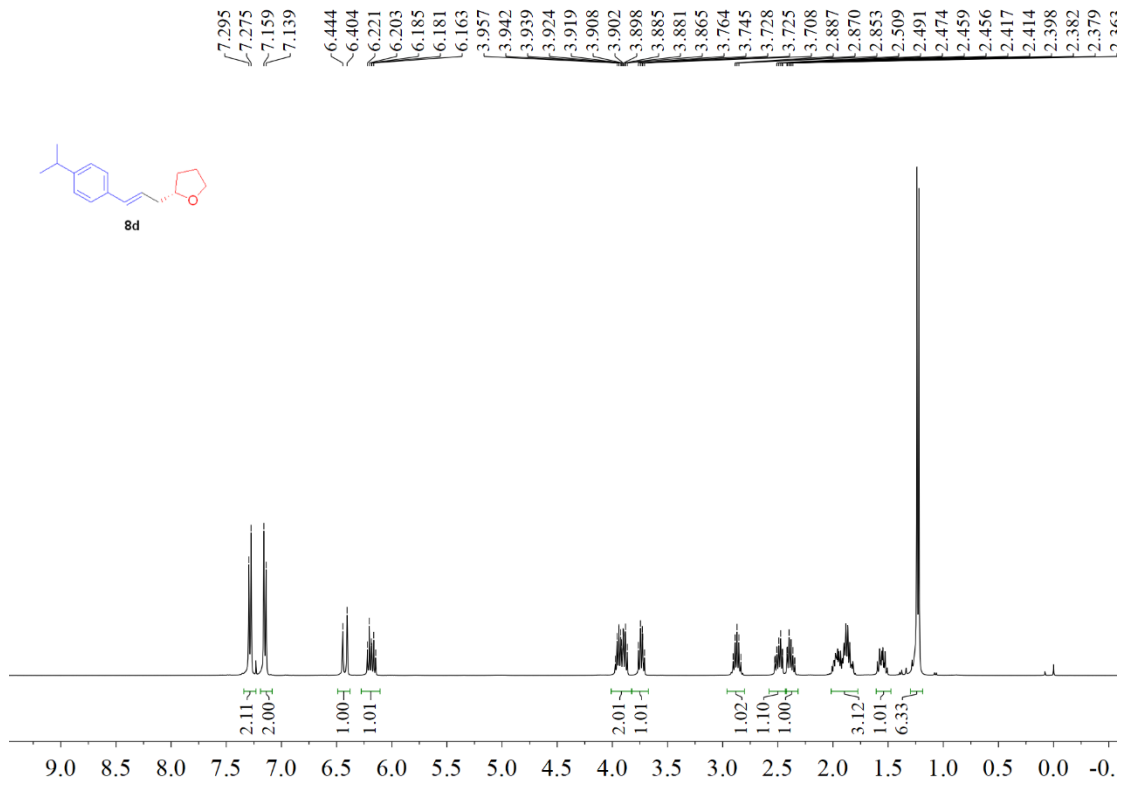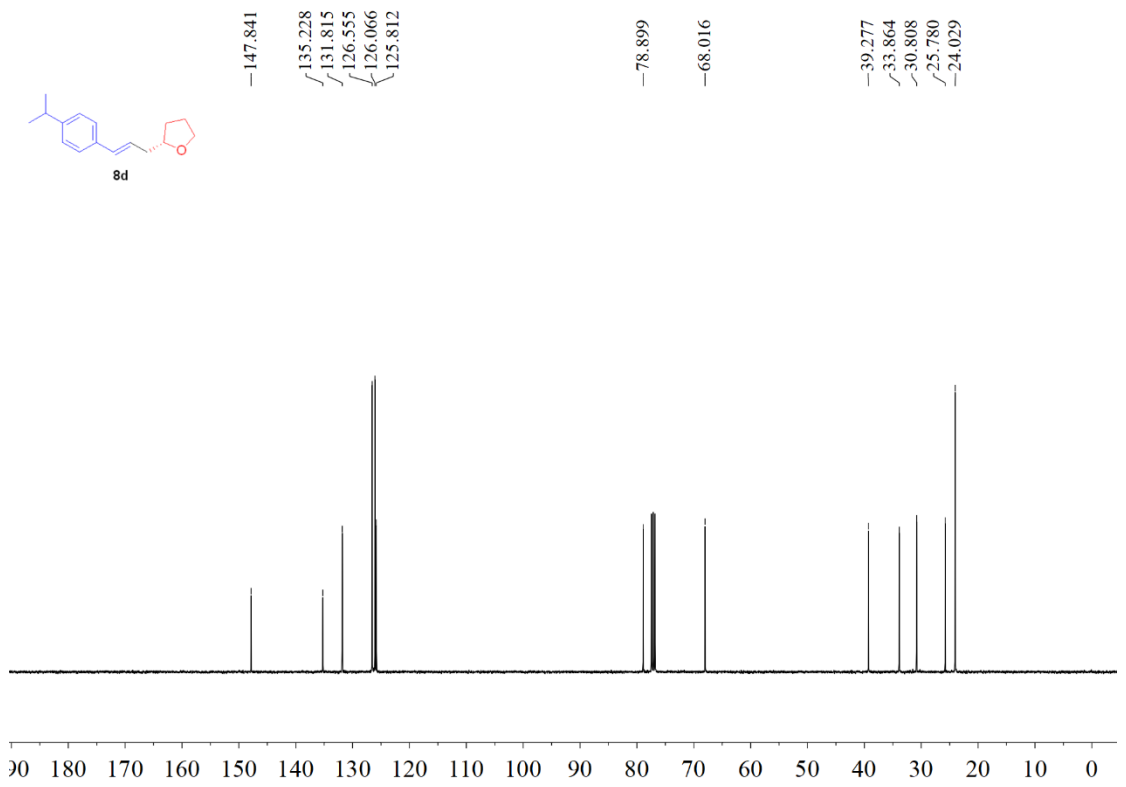



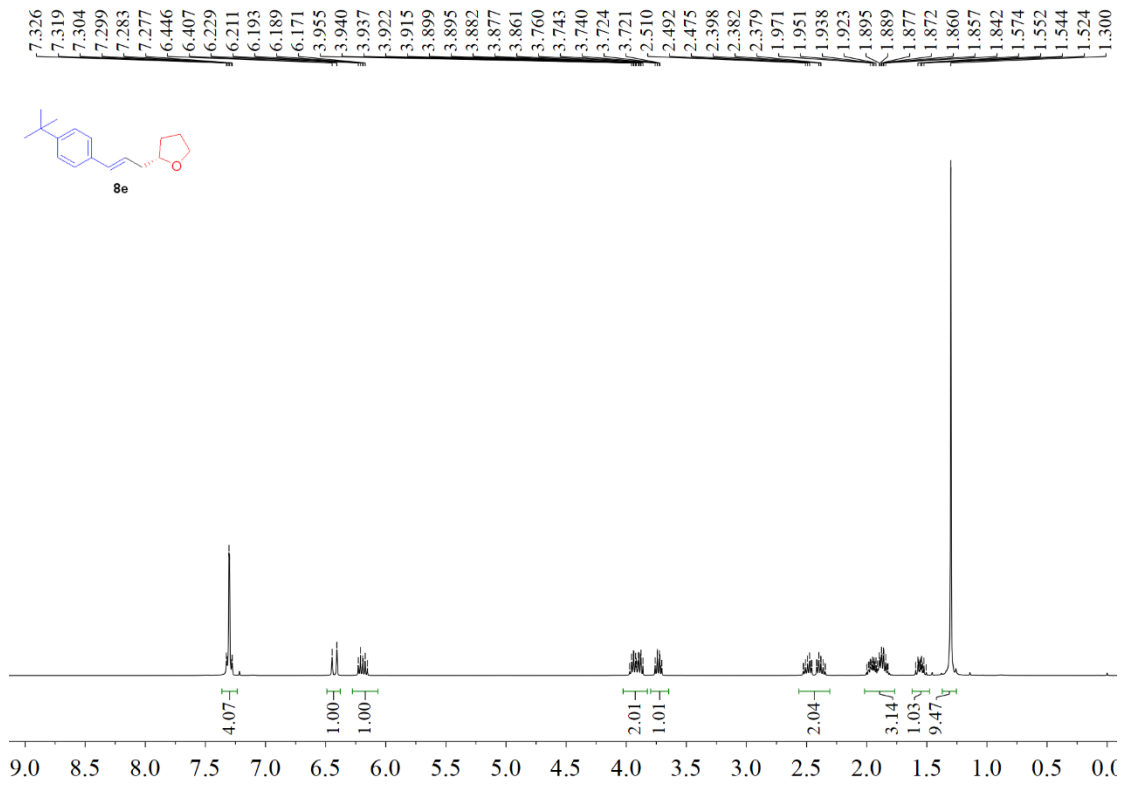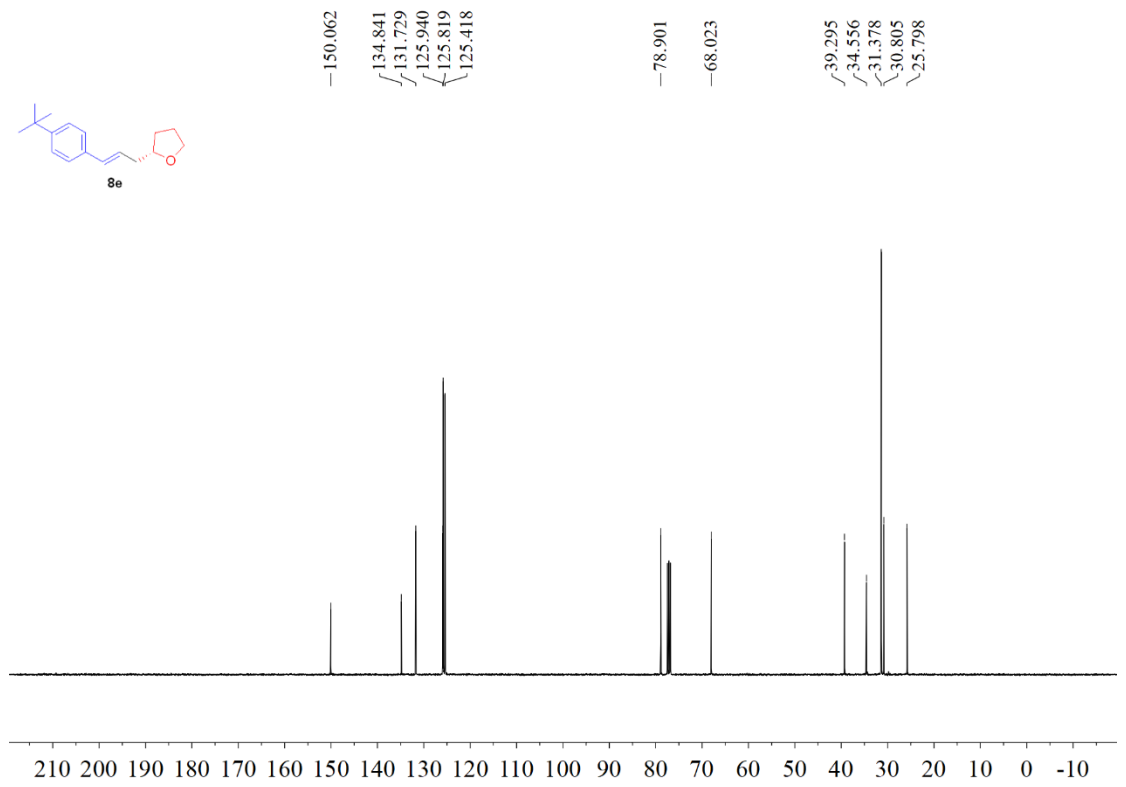

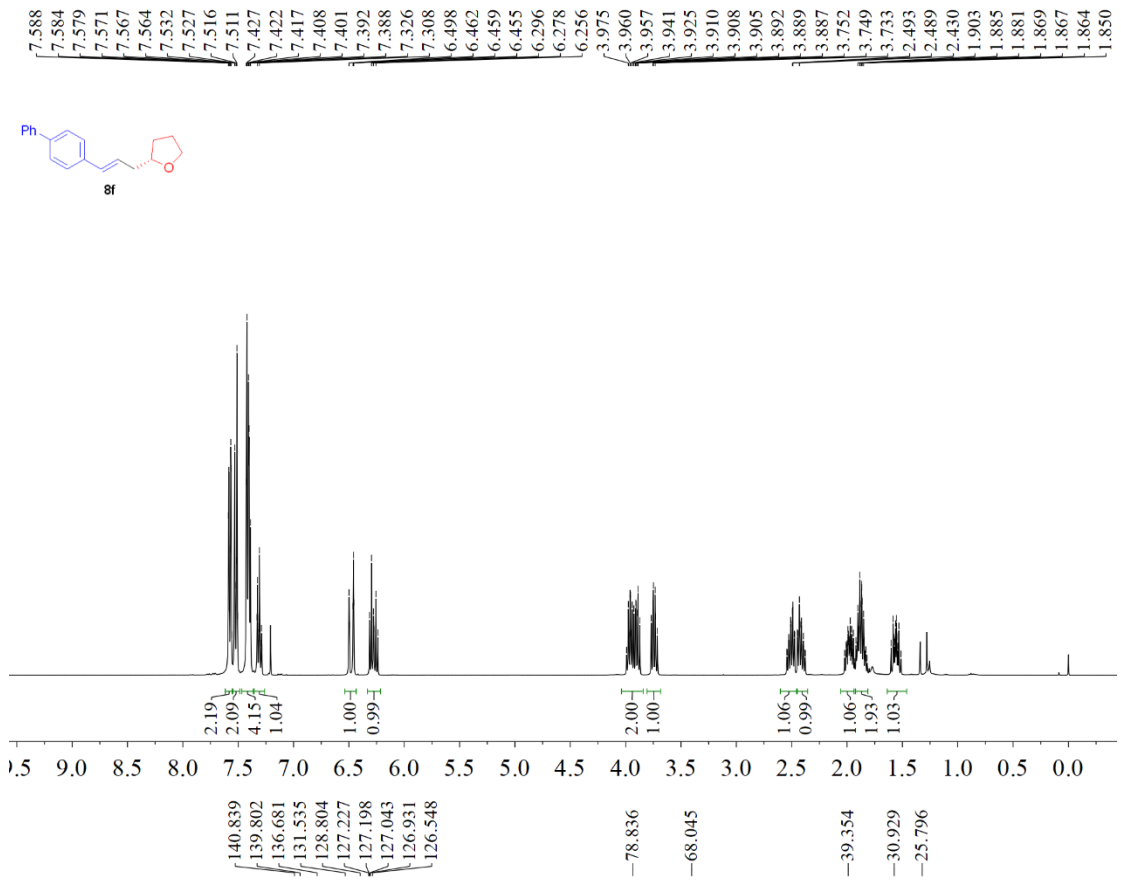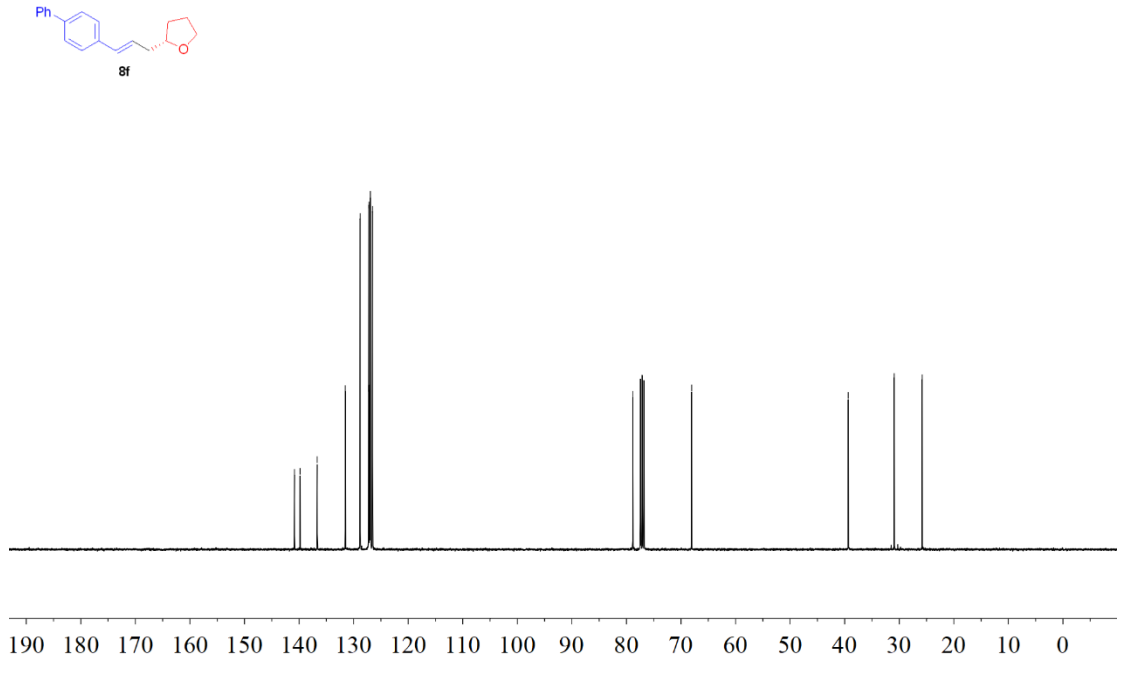

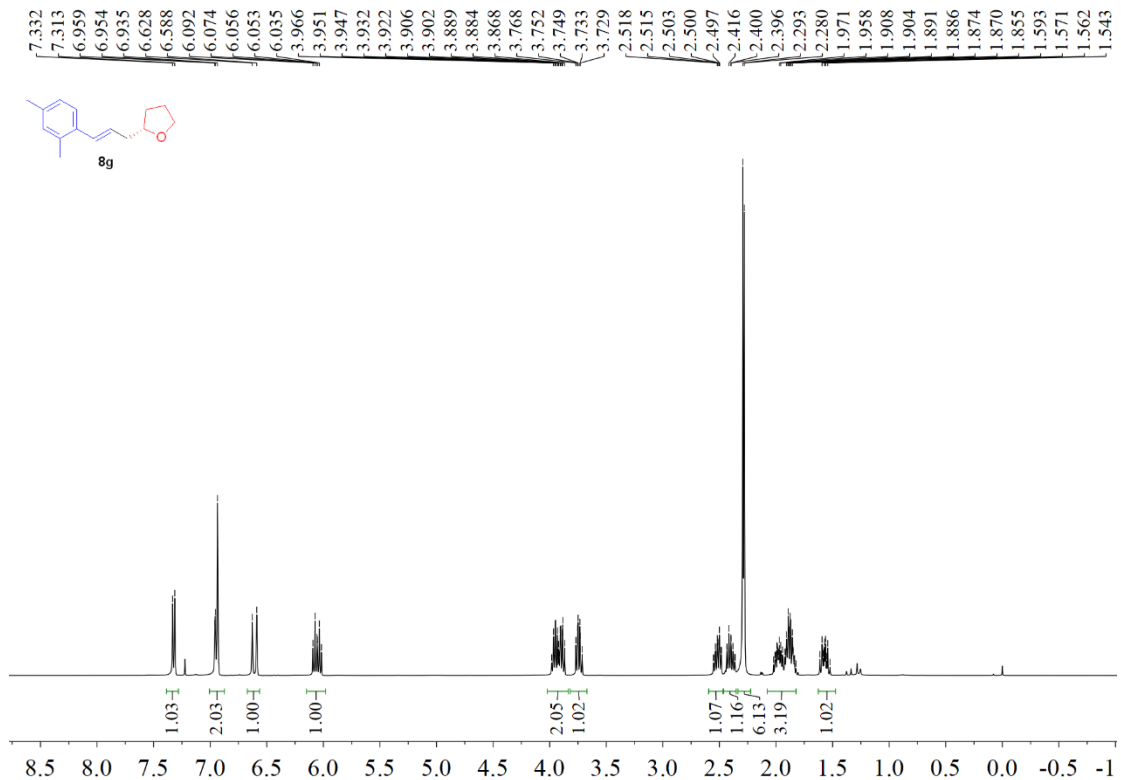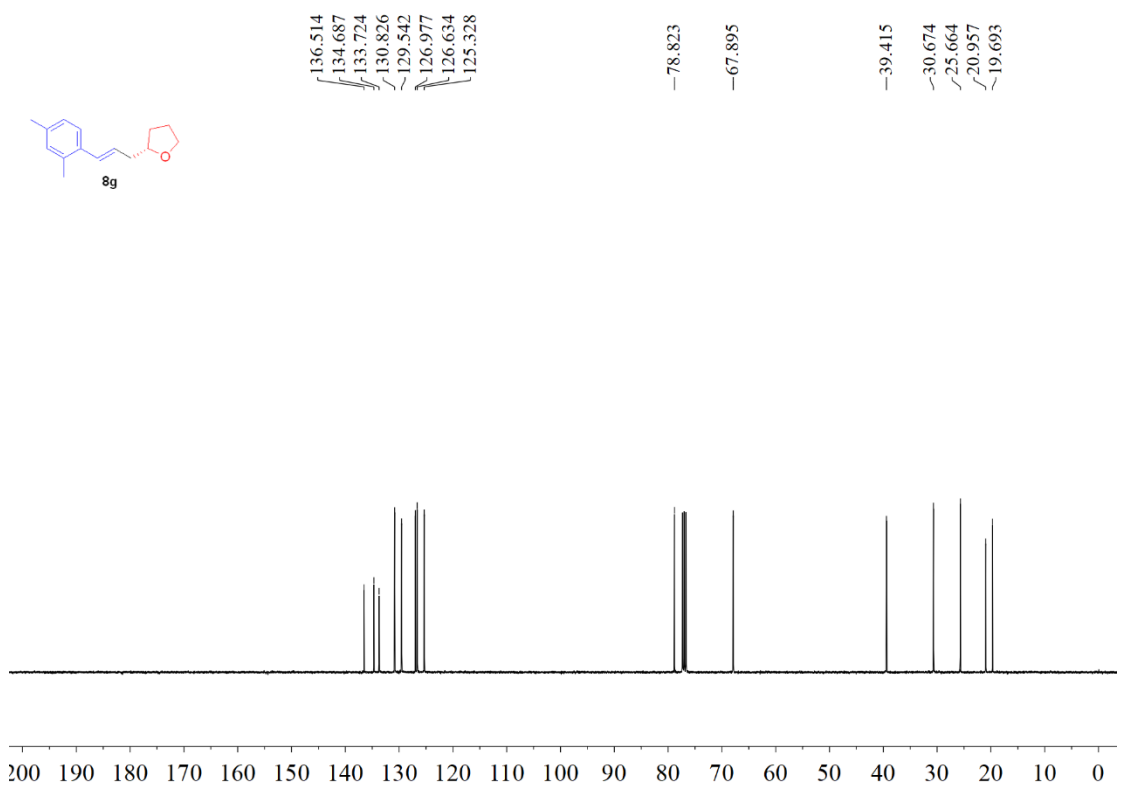

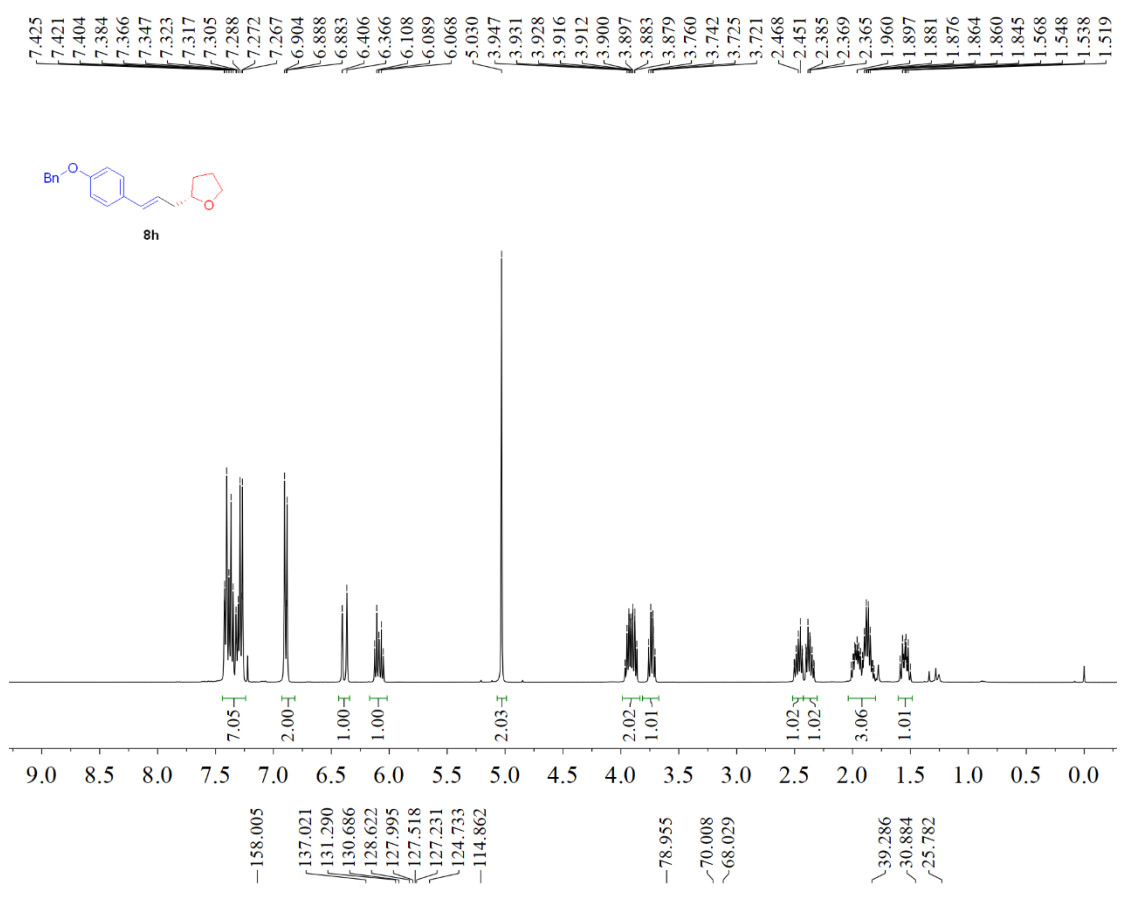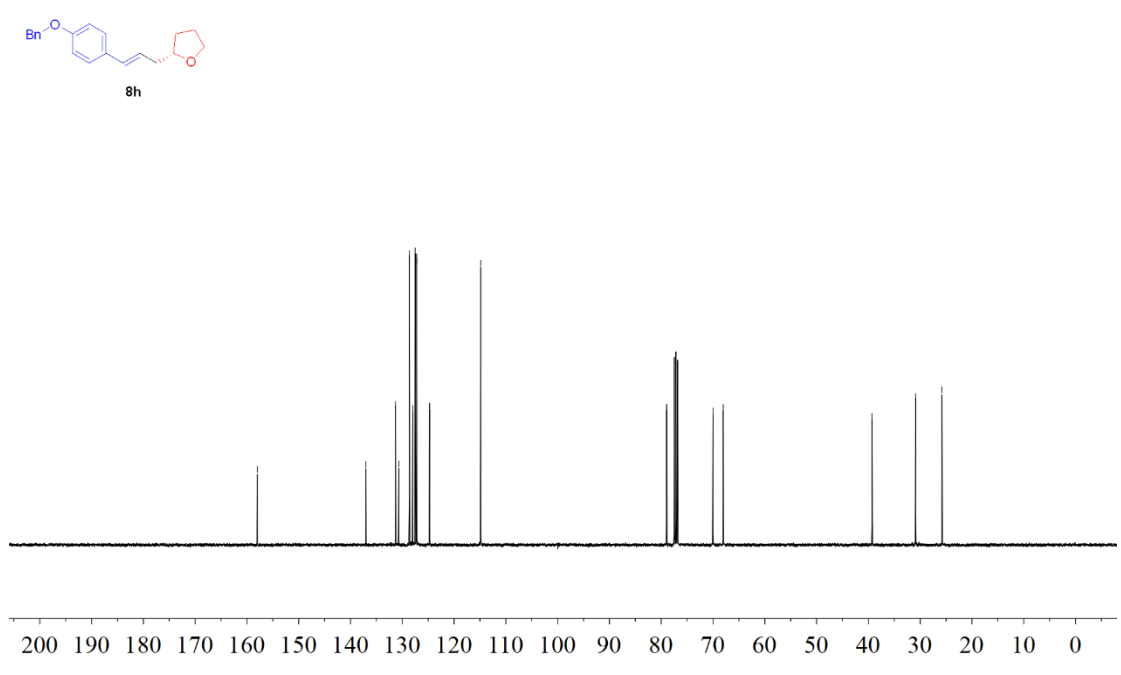

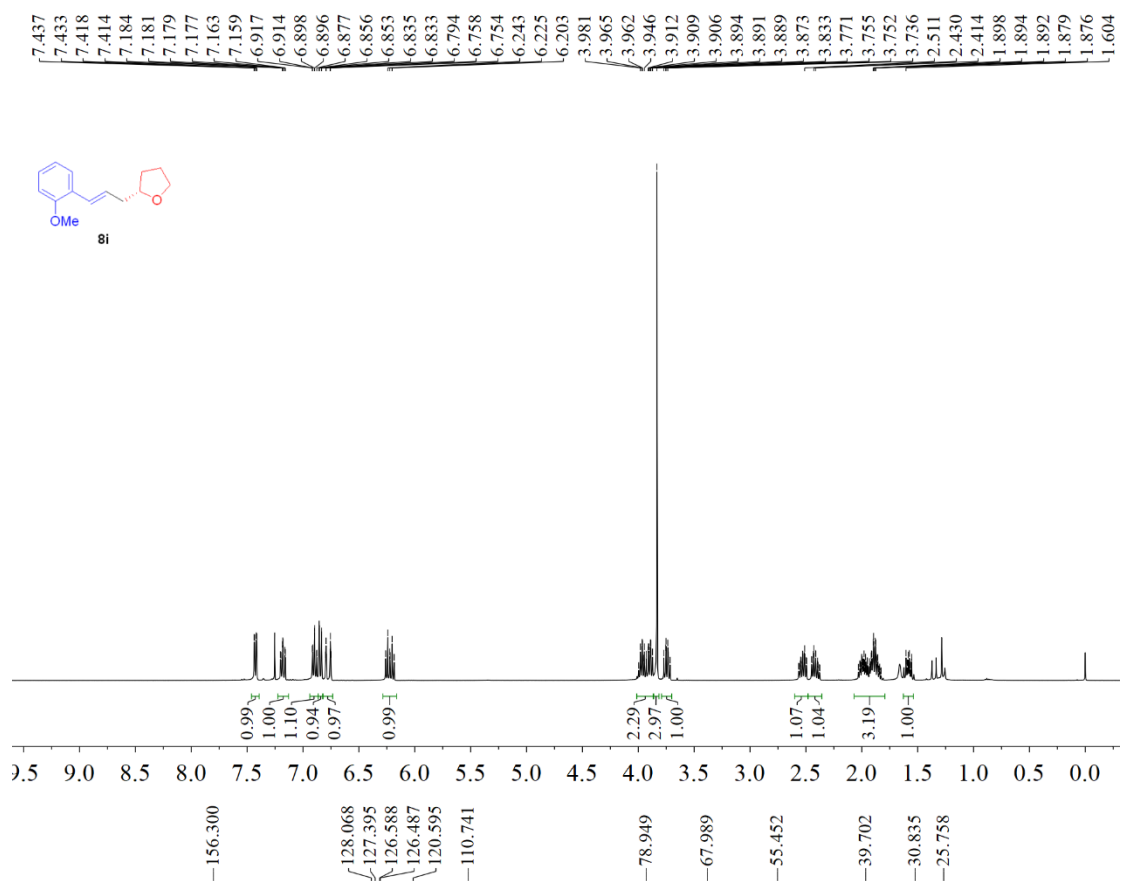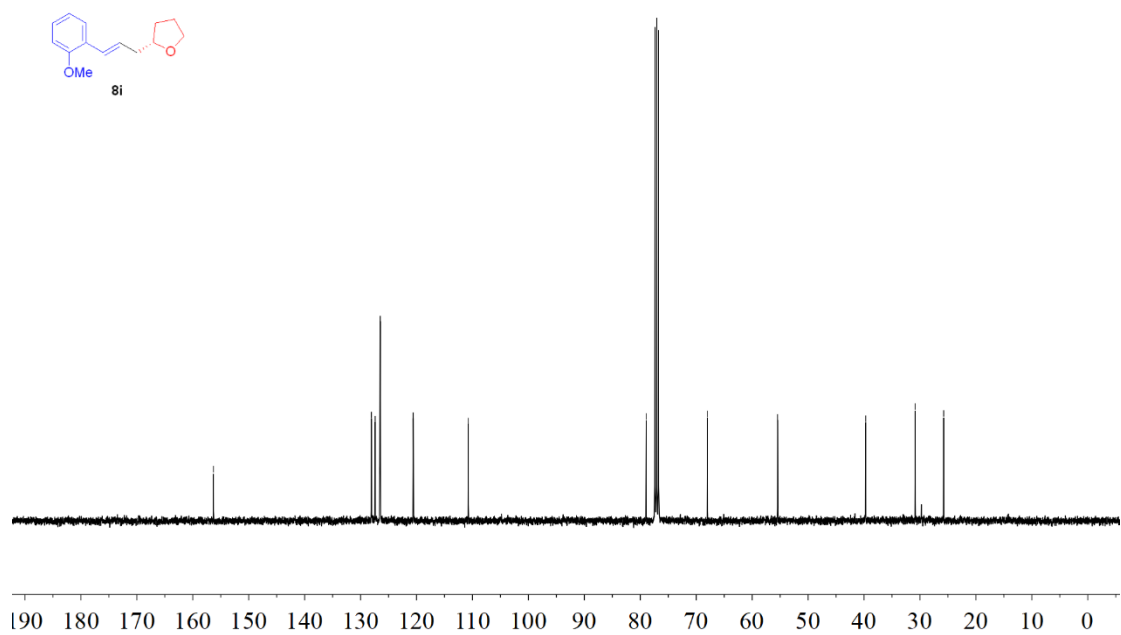

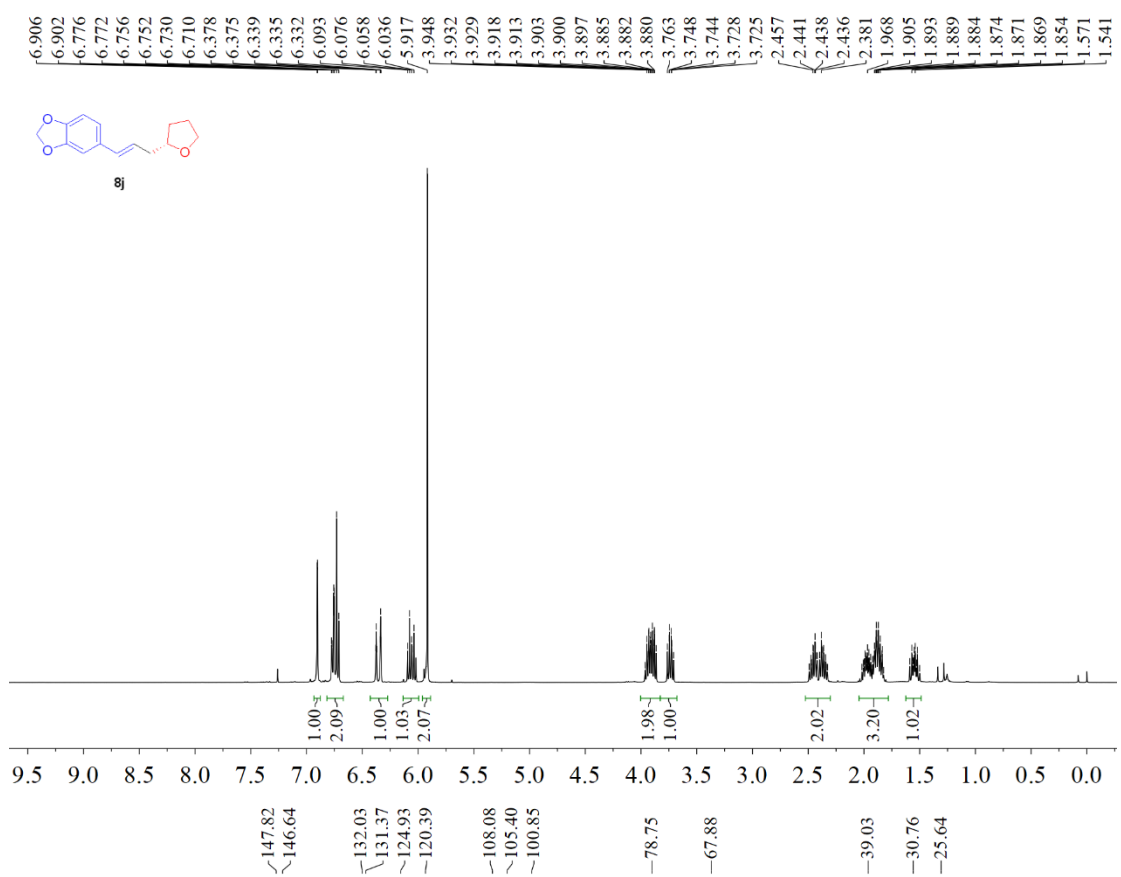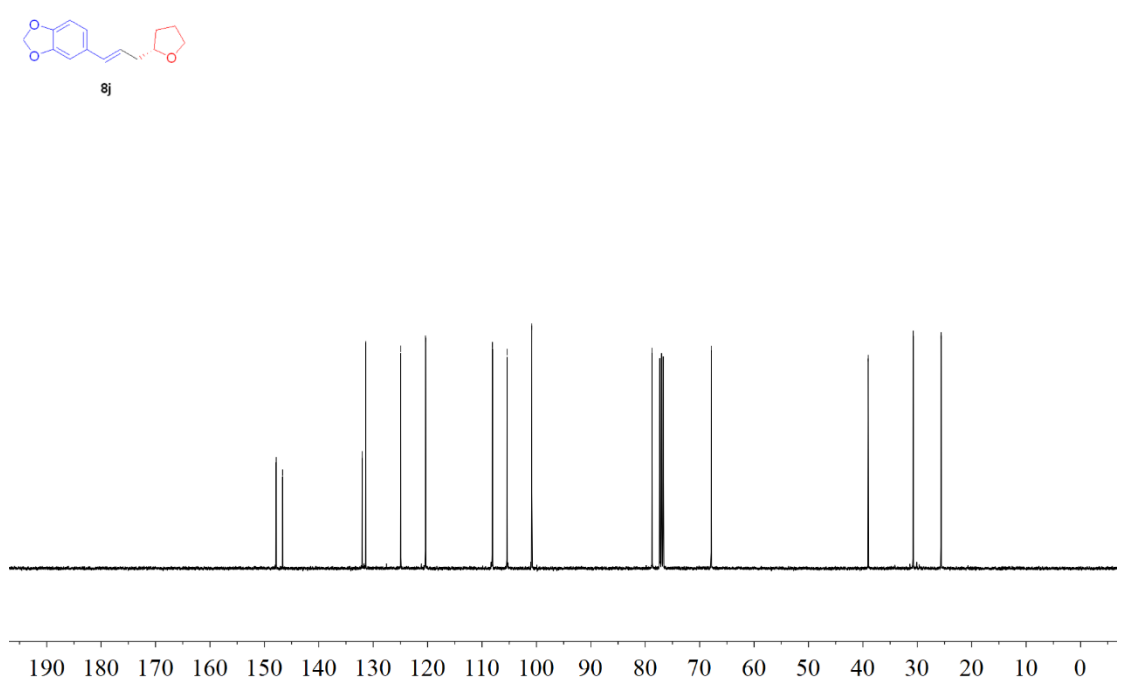

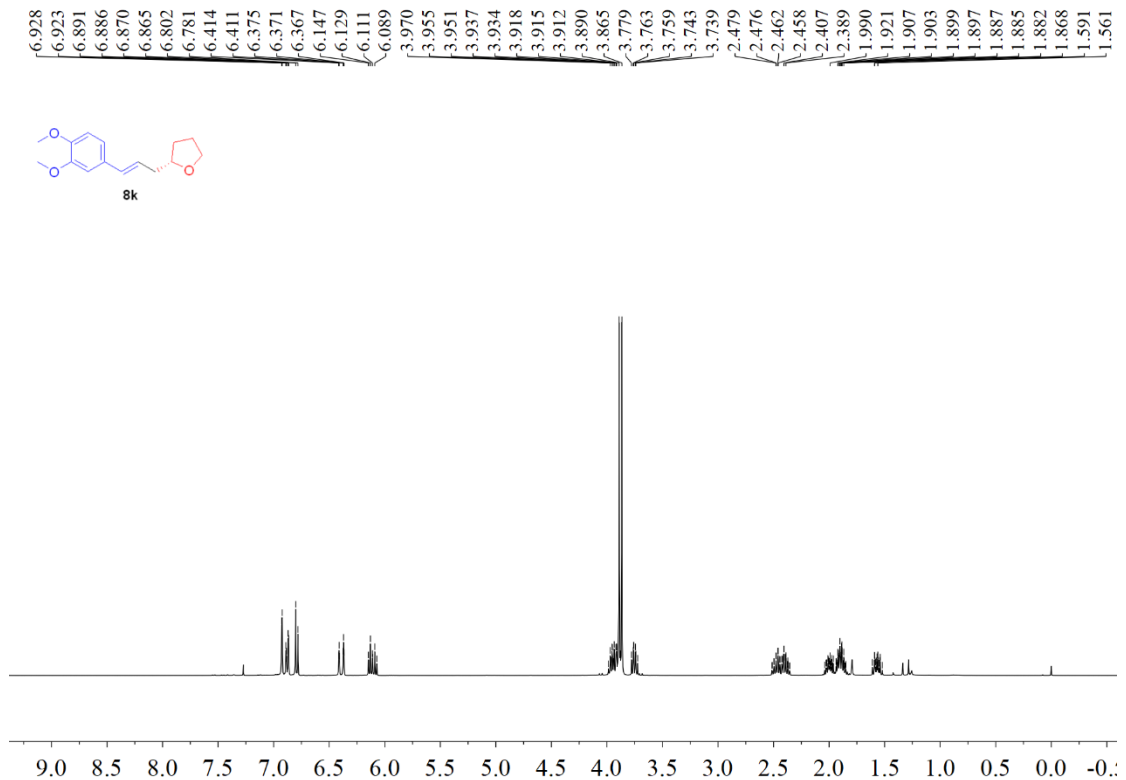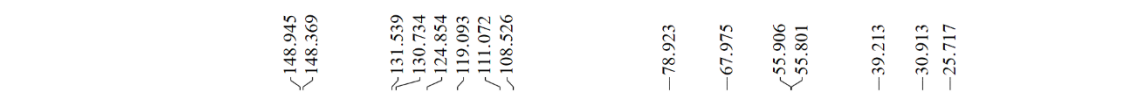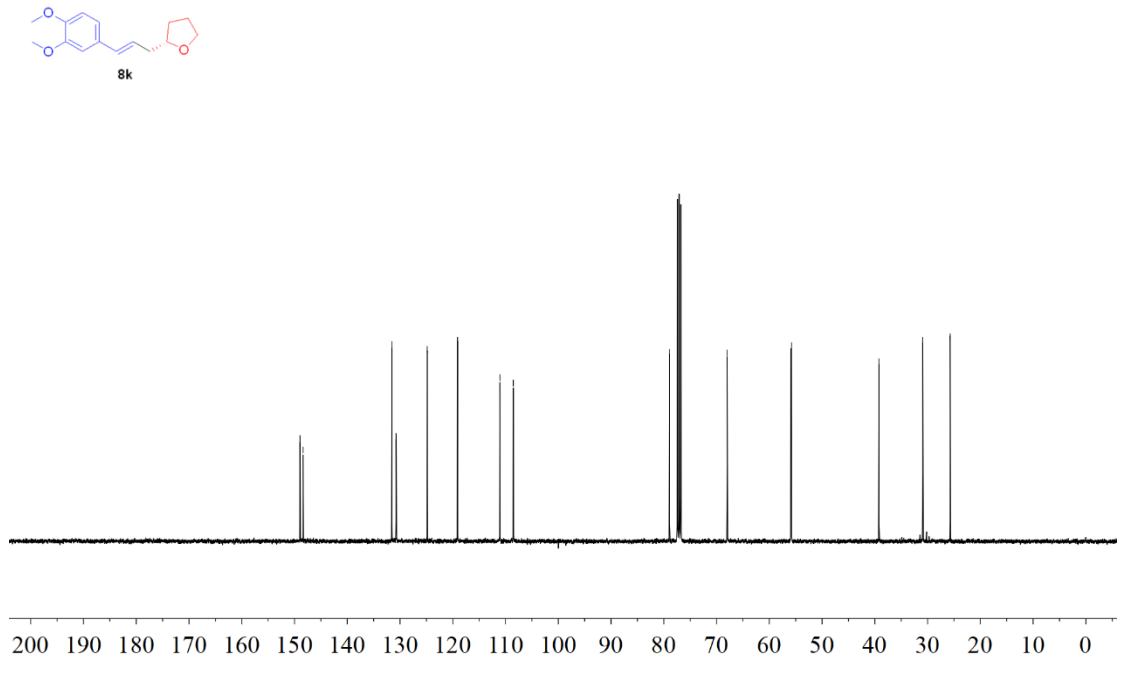

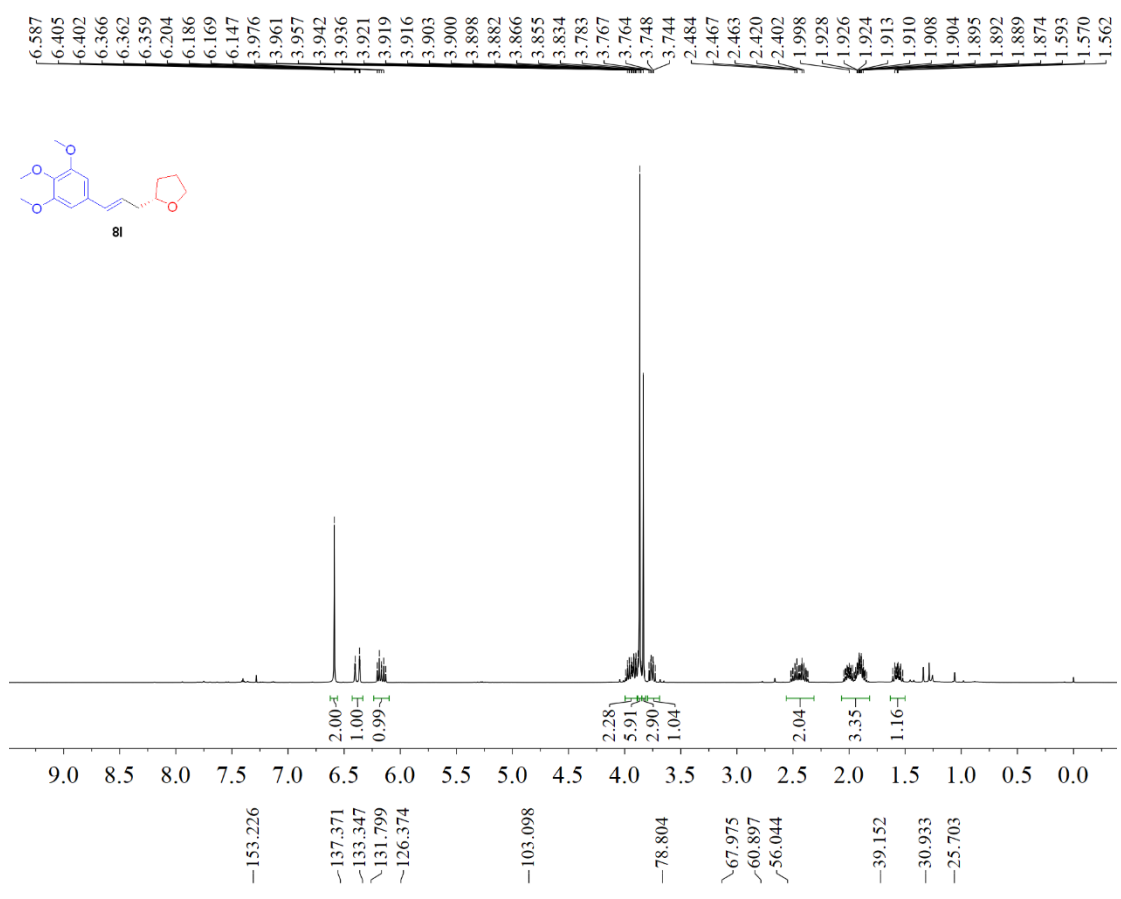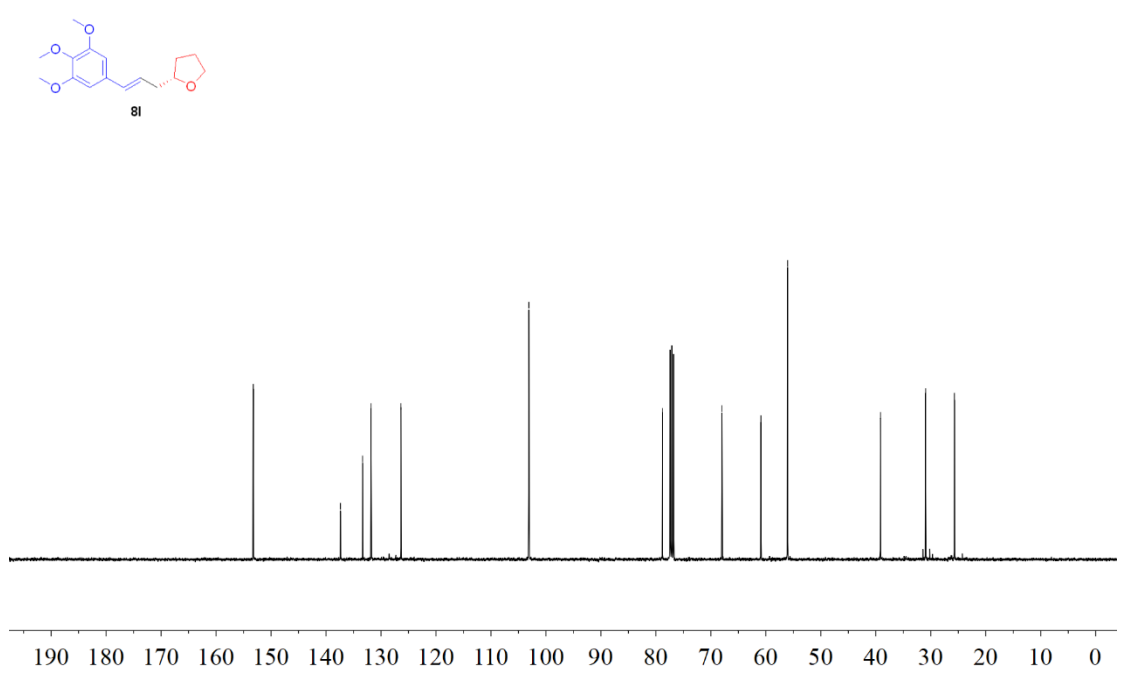



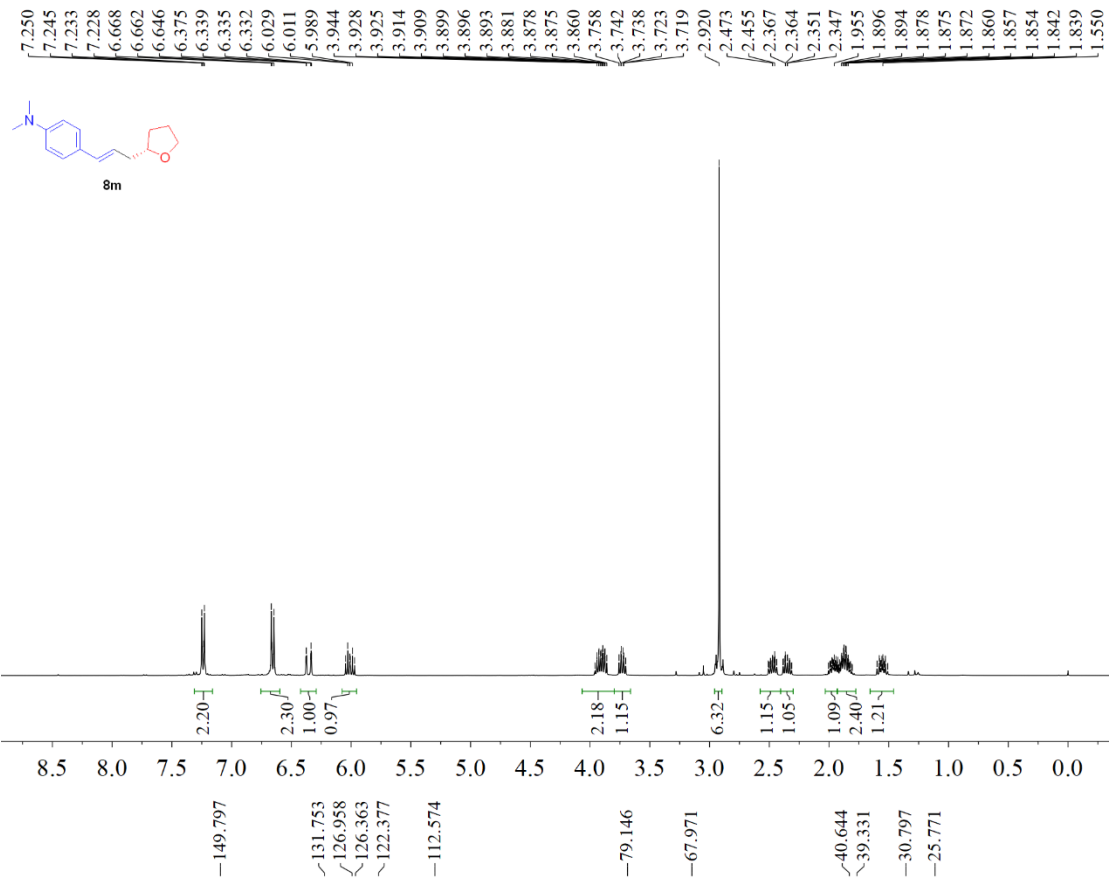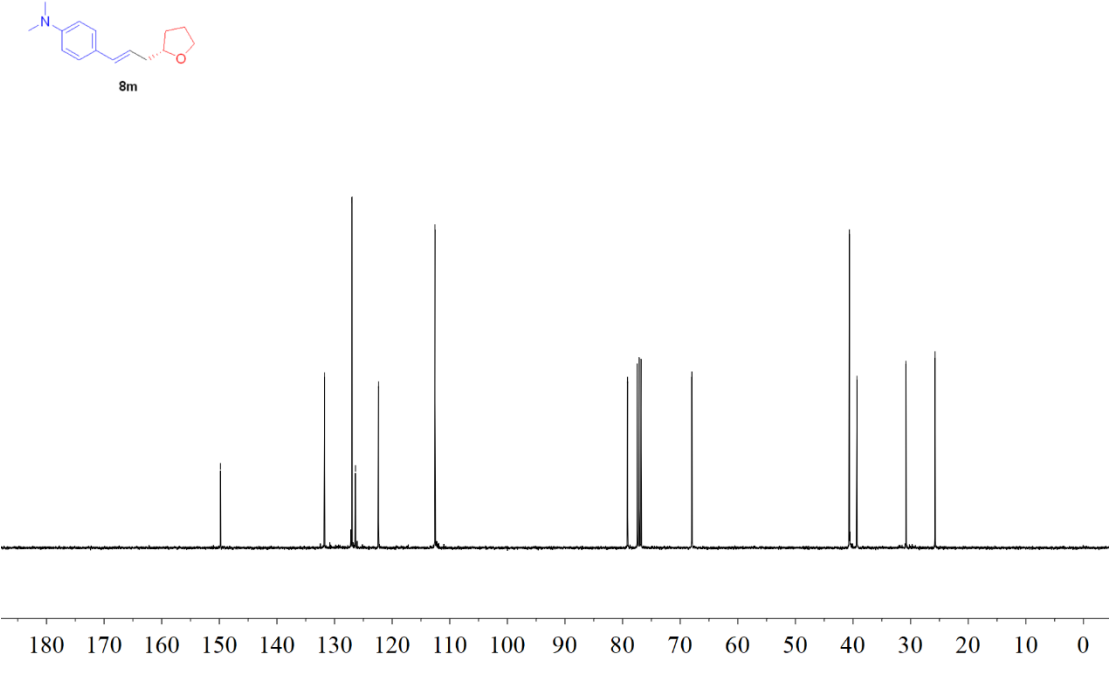

7.568  
7.362  
7.352  
7.346  
7.141  
7.120  
6.456  
6.417  
6.270  
6.252  
6.234  
6.230  
6.212  
6.212  
3.973  
3.956  
3.939  
3.931  
3.915  
3.911  
3.897  
3.894  
3.877  
3.777  
3.759  
3.742  
3.738  
3.738  
3.722  
2.483  
2.466  
2.450  
2.447  
2.433  
2.416  
2.008  
2.003  
1.988  
1.974  
1.959  
1.924  
1.919  
1.915  
1.906  
1.899  
1.889  
1.885  
1.869  
1.579  
1.558  
1.549  
1.529

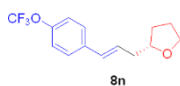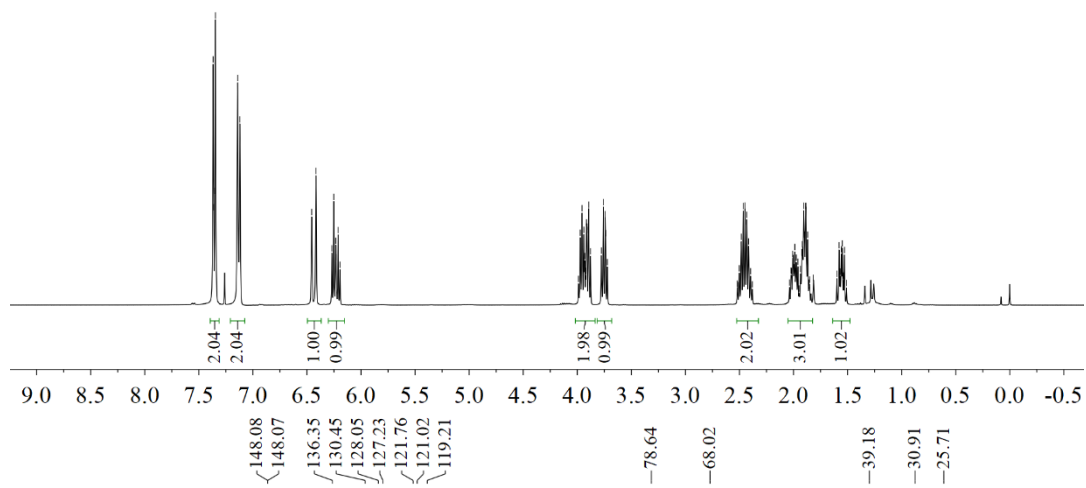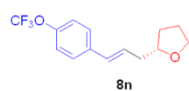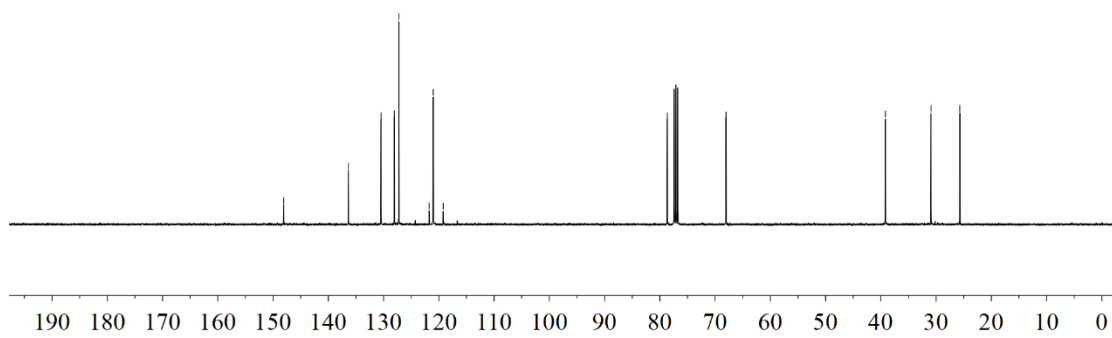

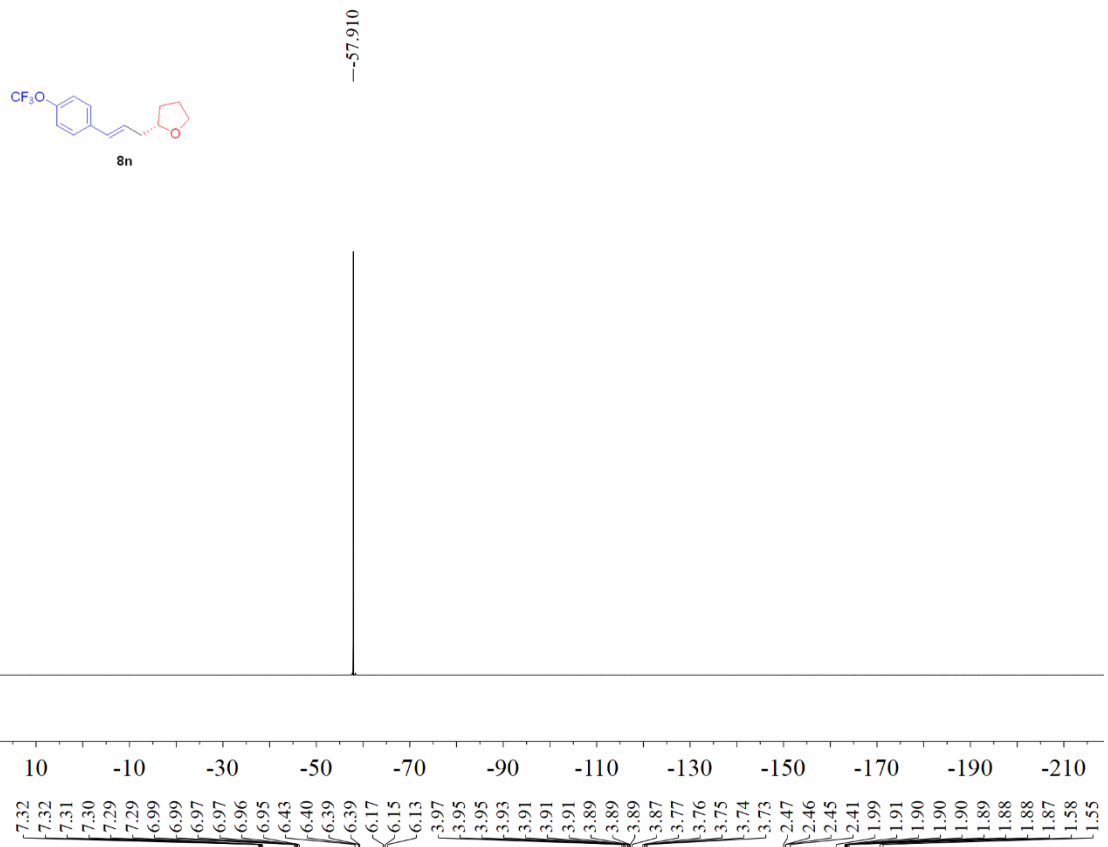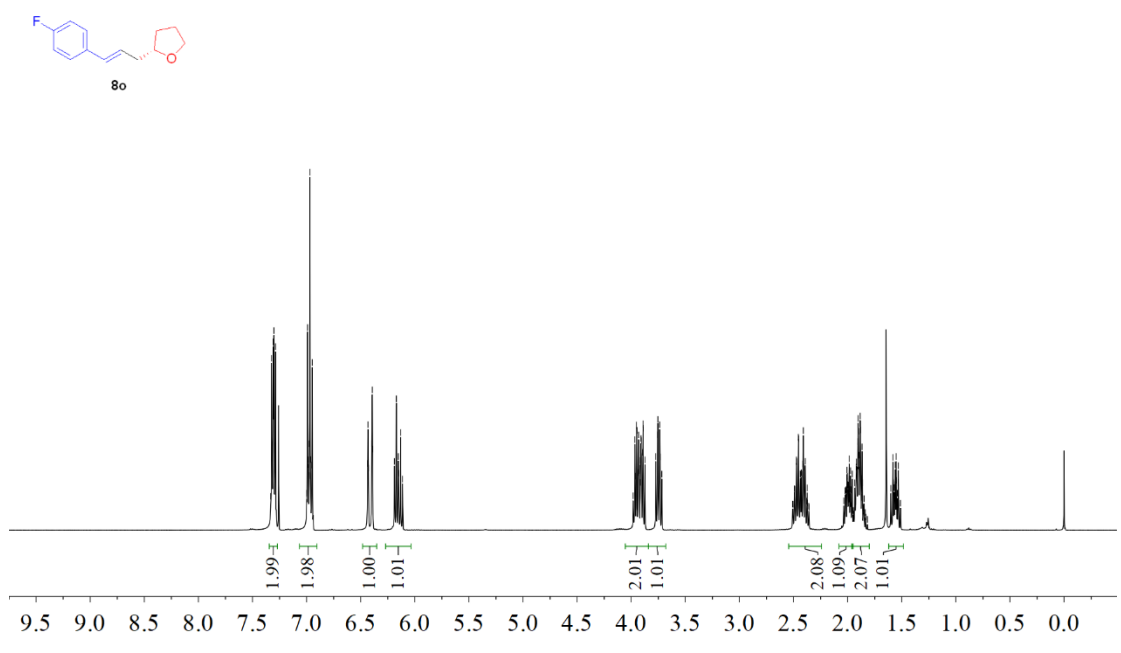

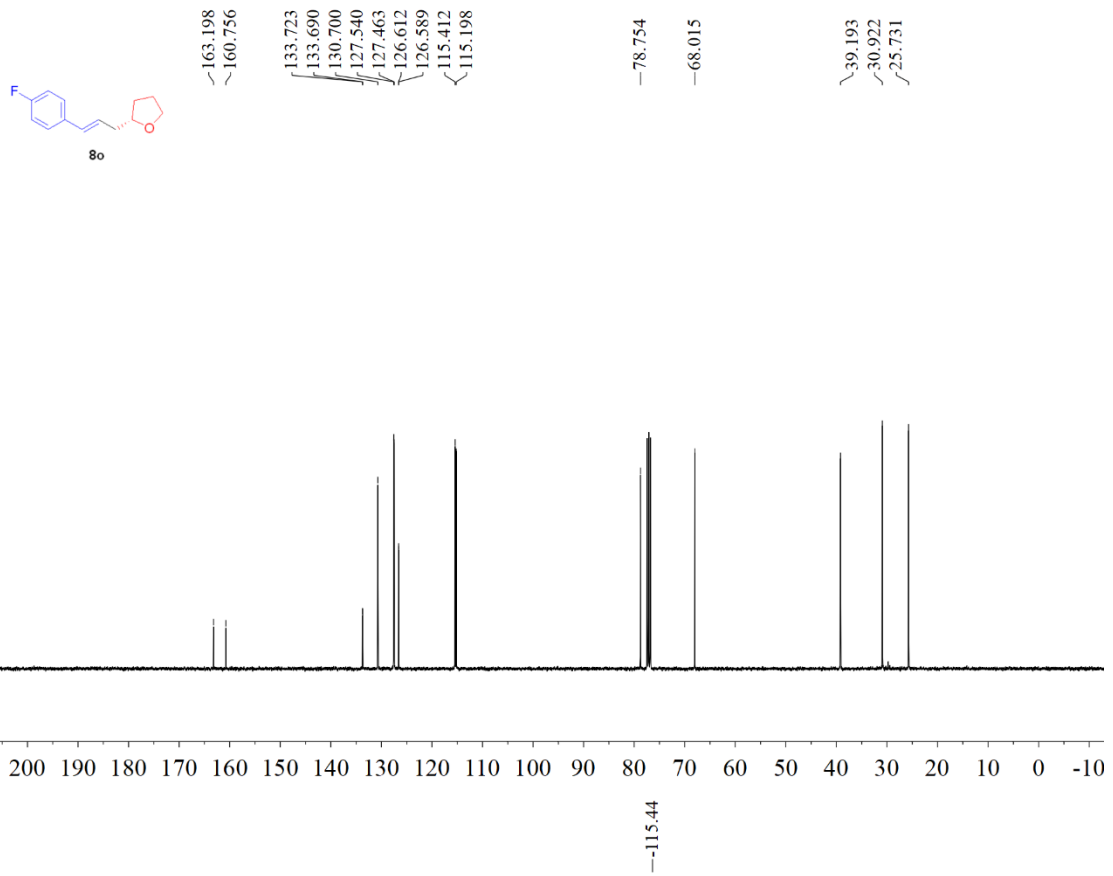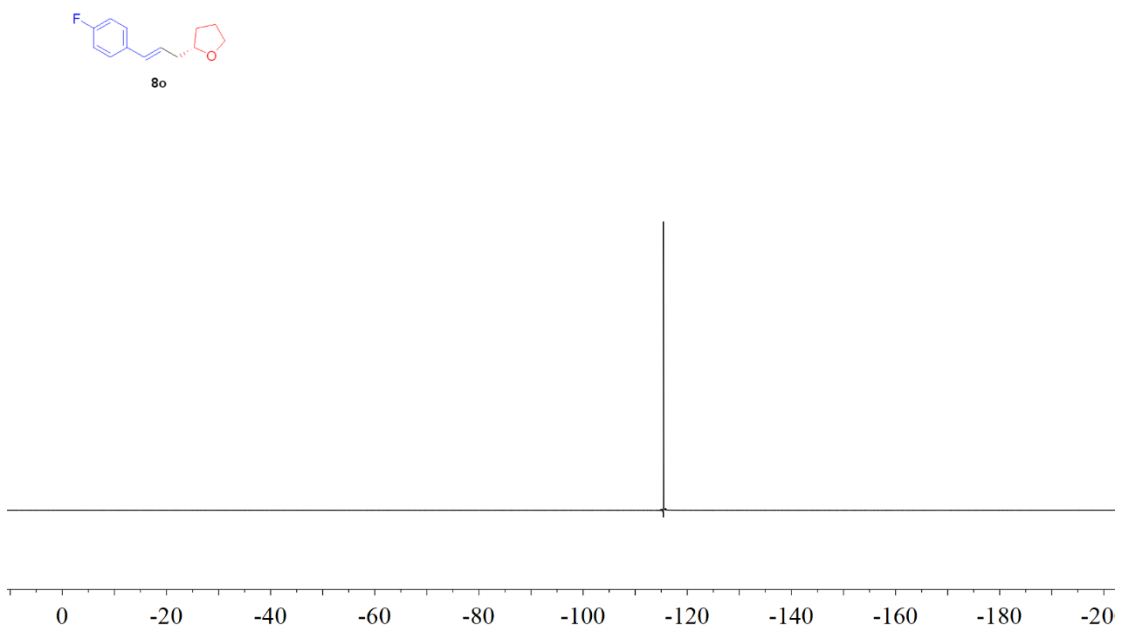

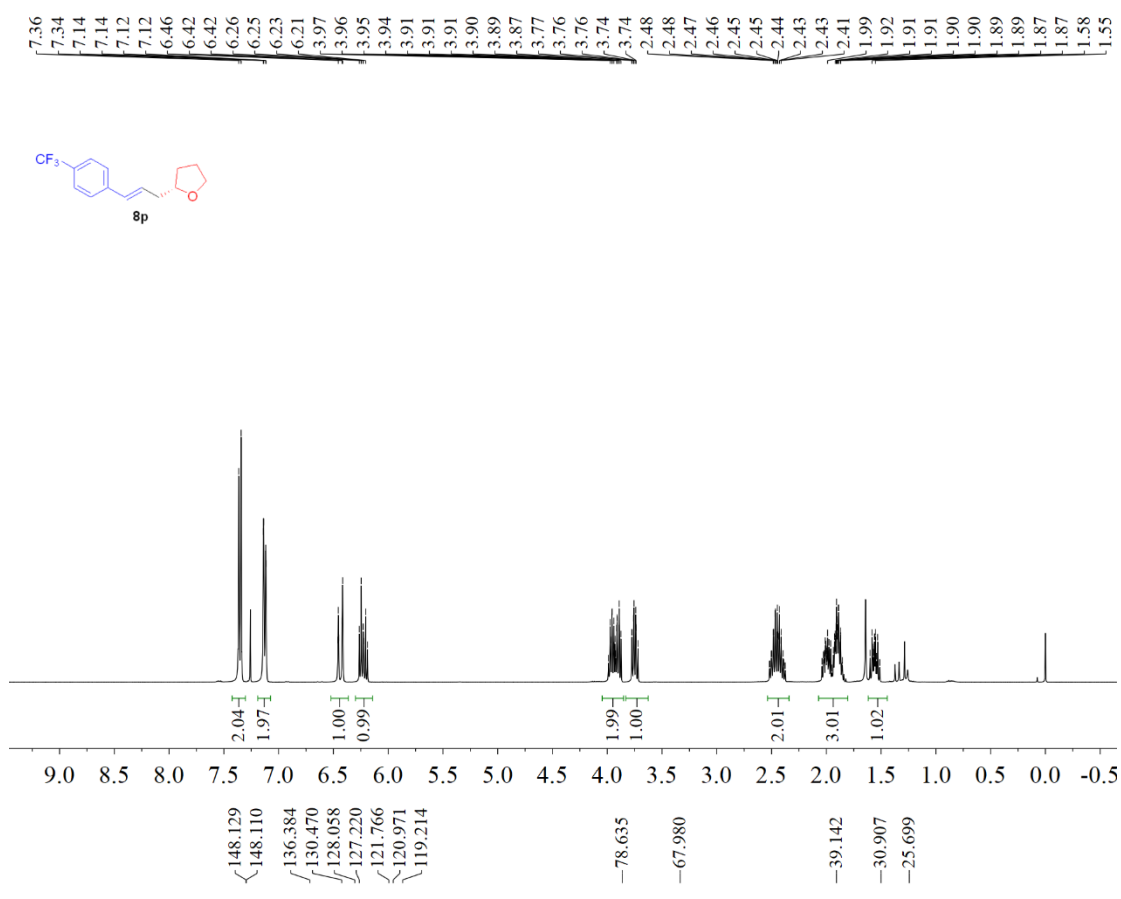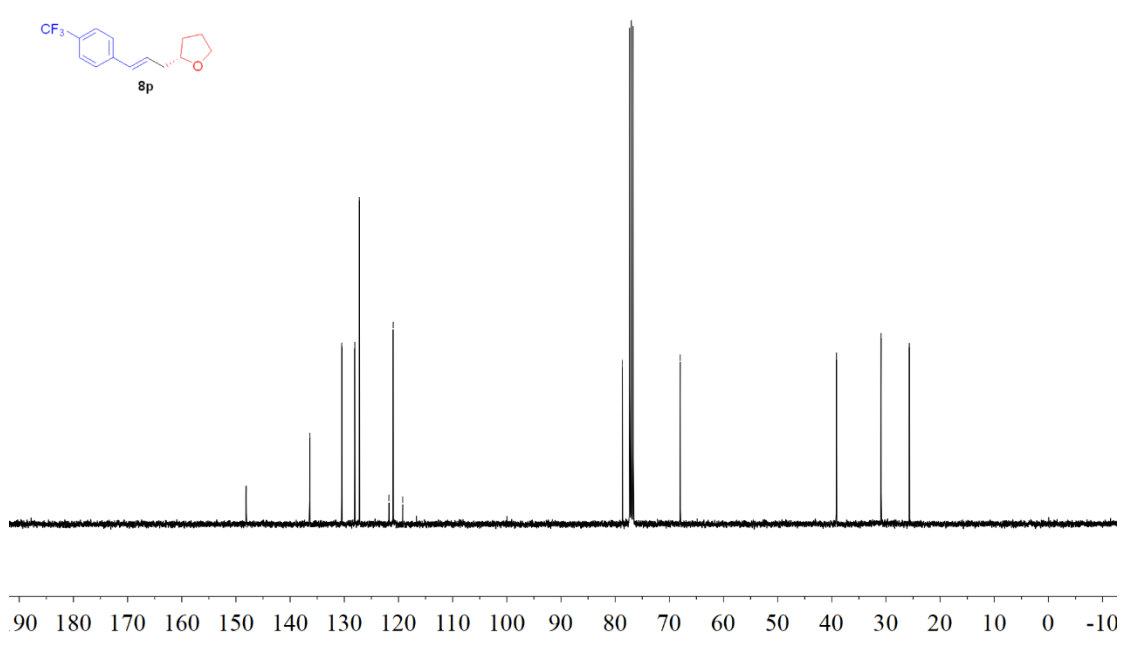

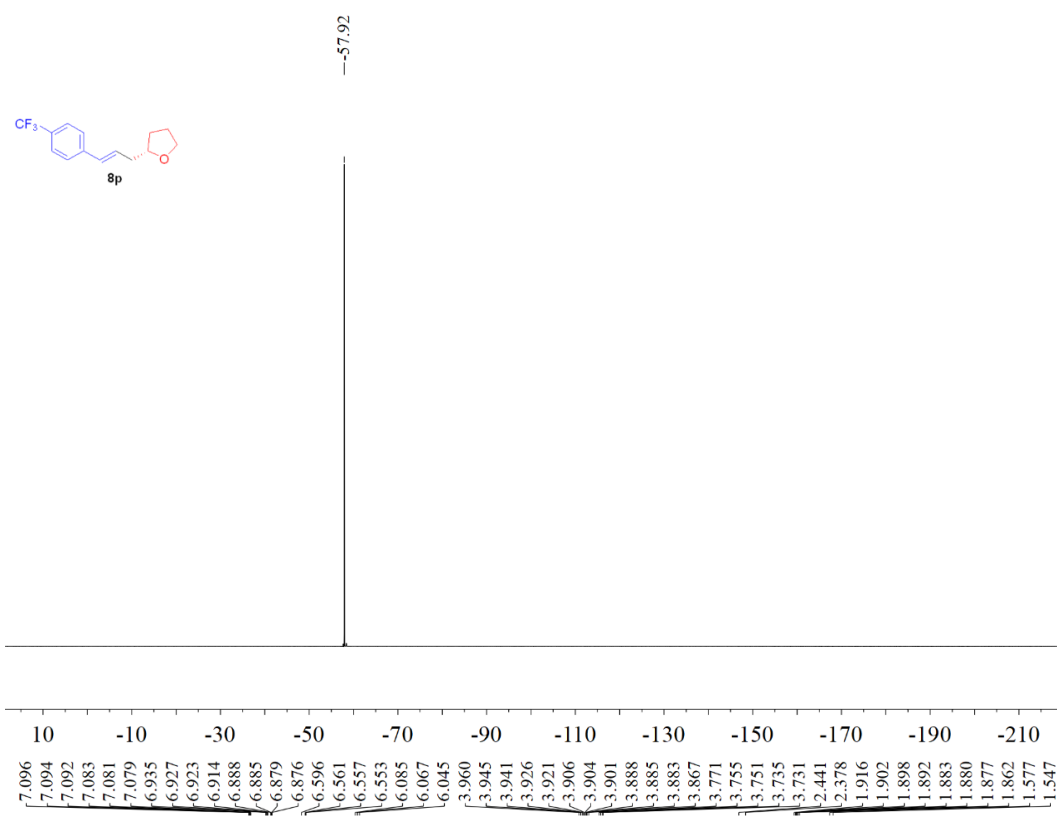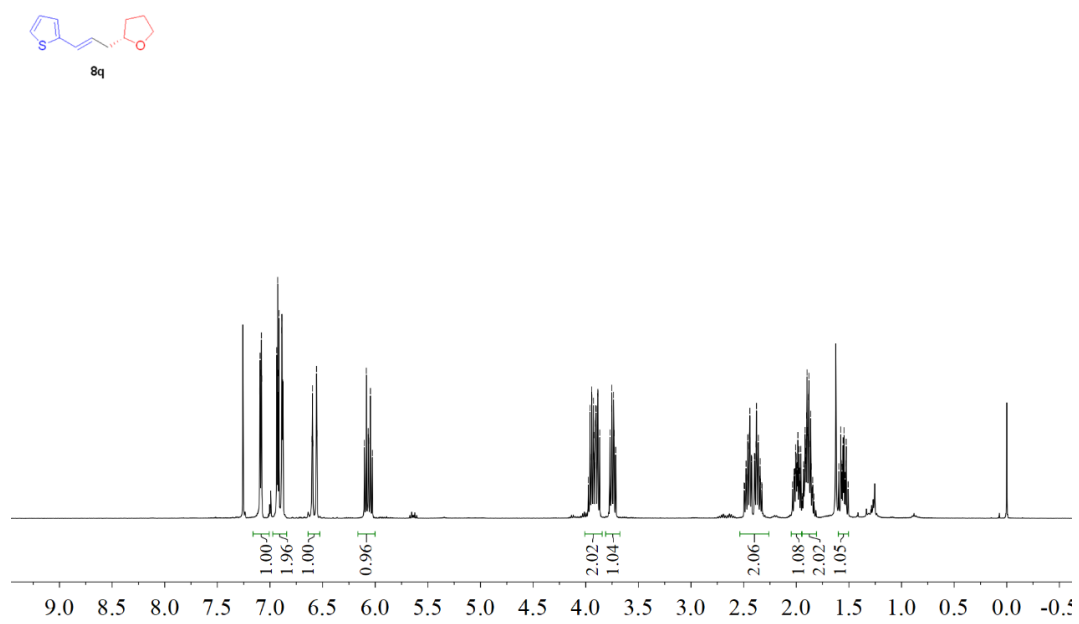

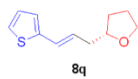

-142.778  
 127.211  
 126.692  
 125.153  
 124.661  
 123.414  
 -78.621  
 -68.025  
 -39.088  
 -30.897  
 -25.750

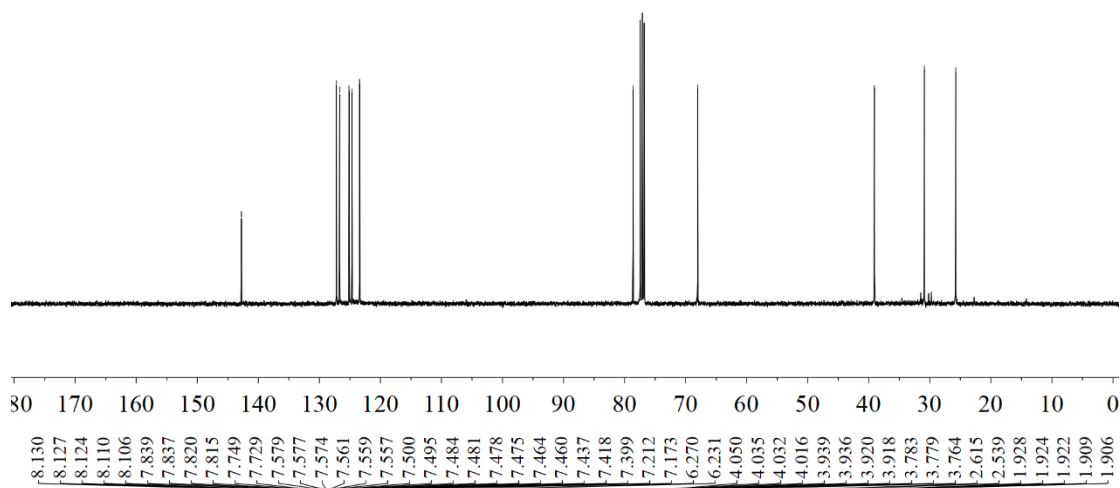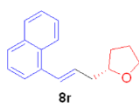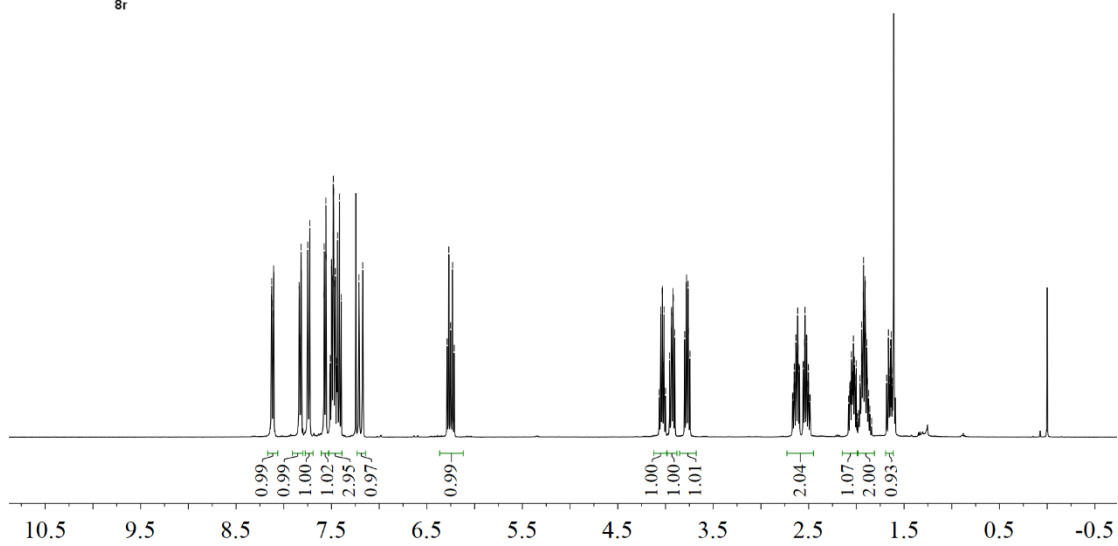

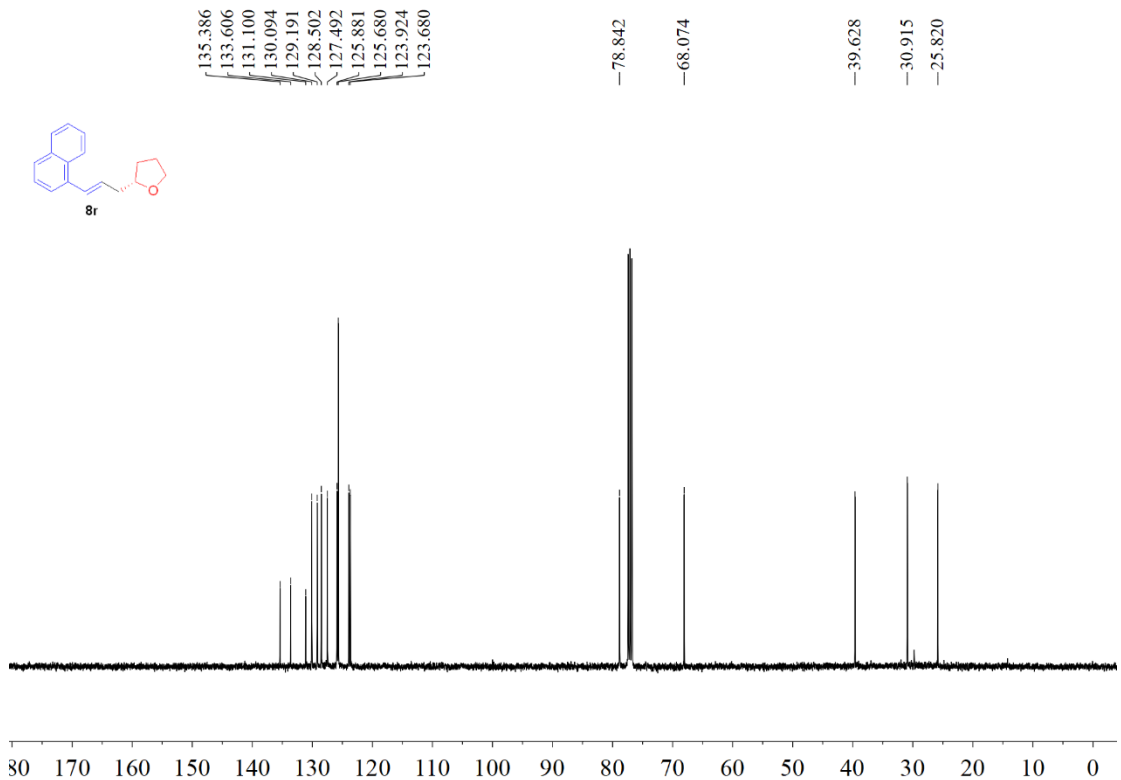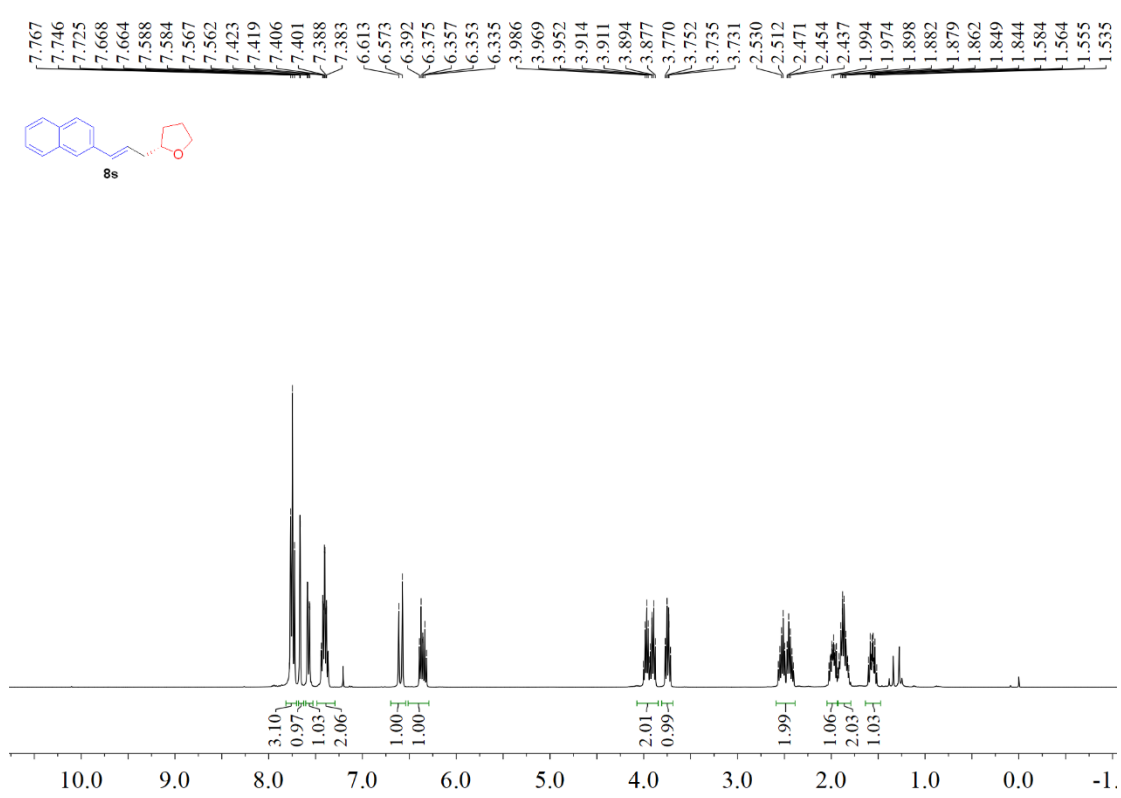



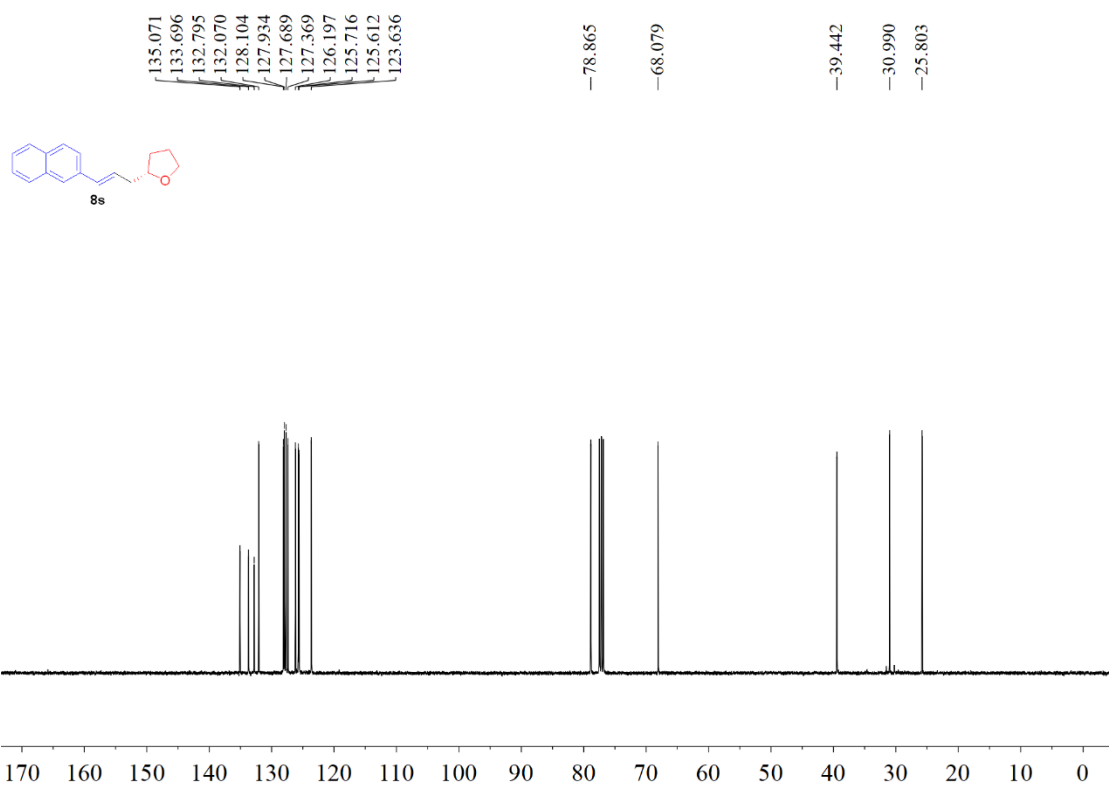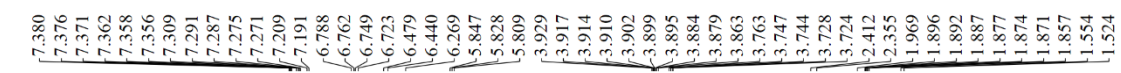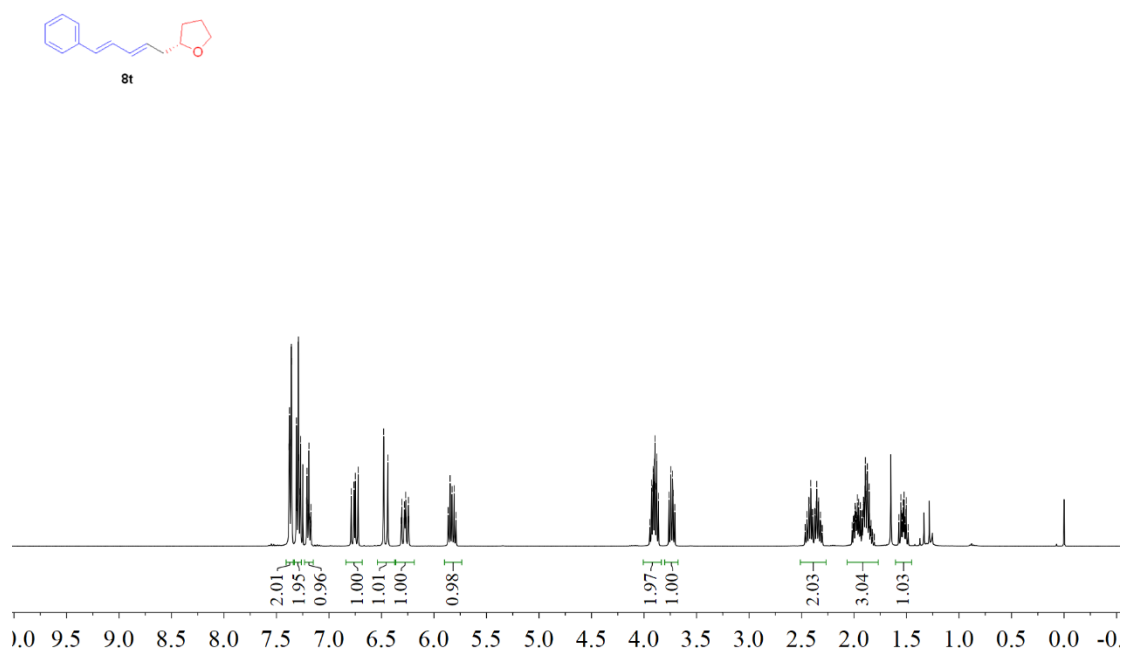

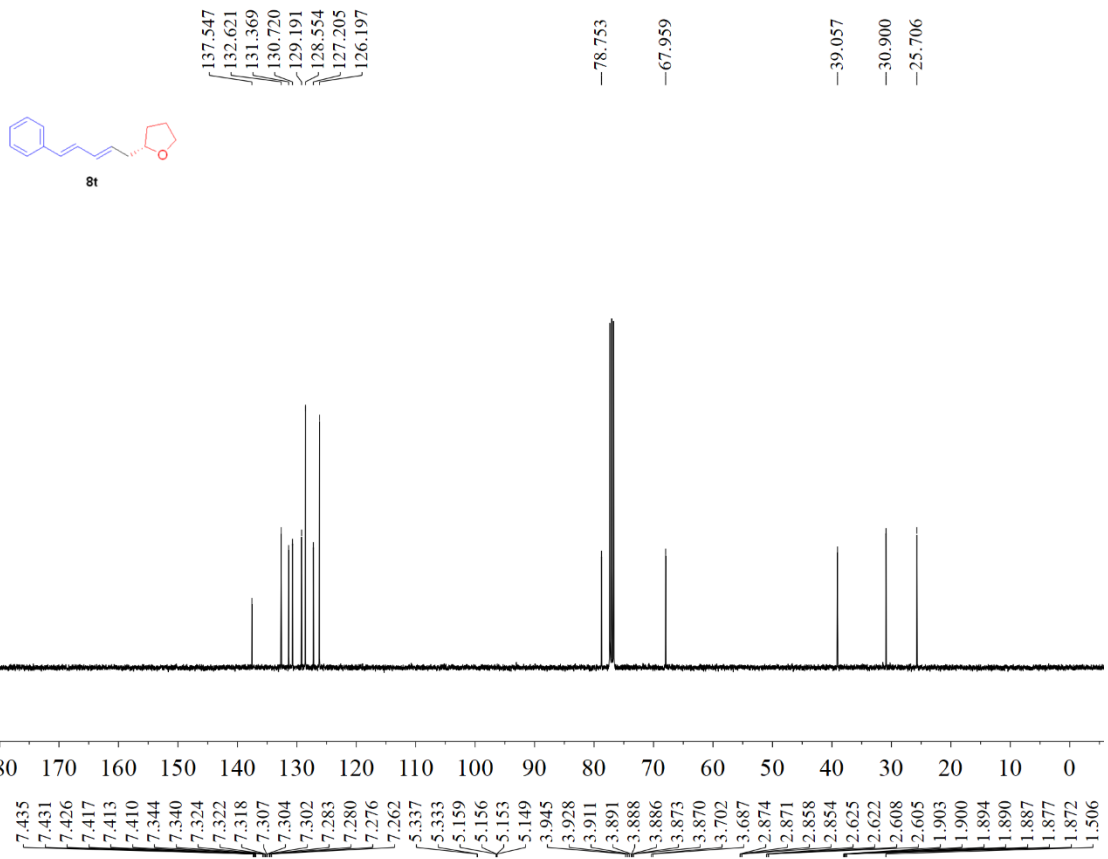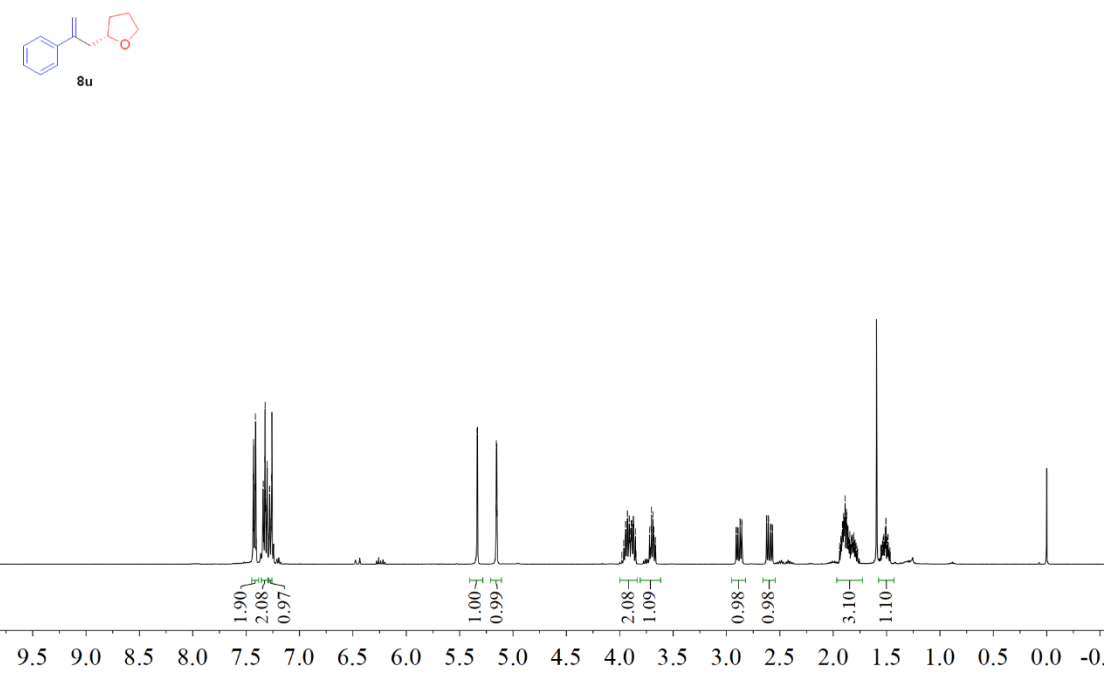

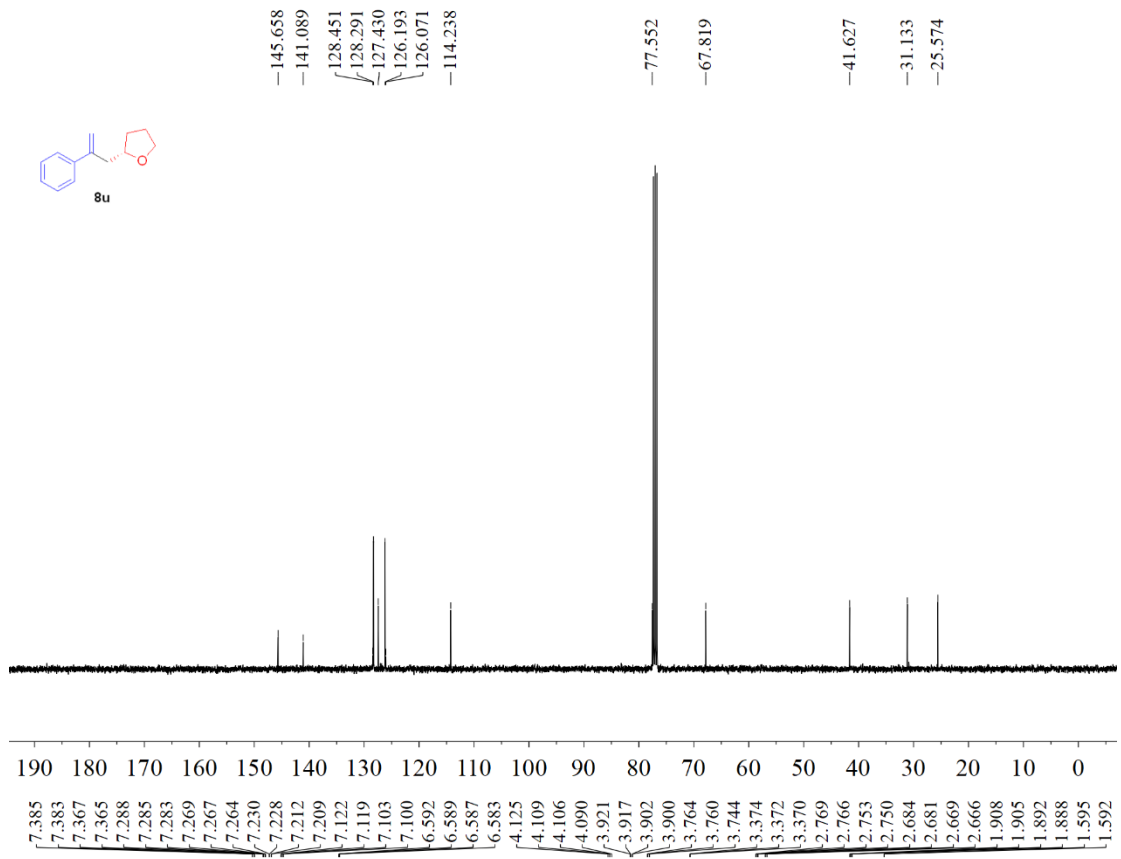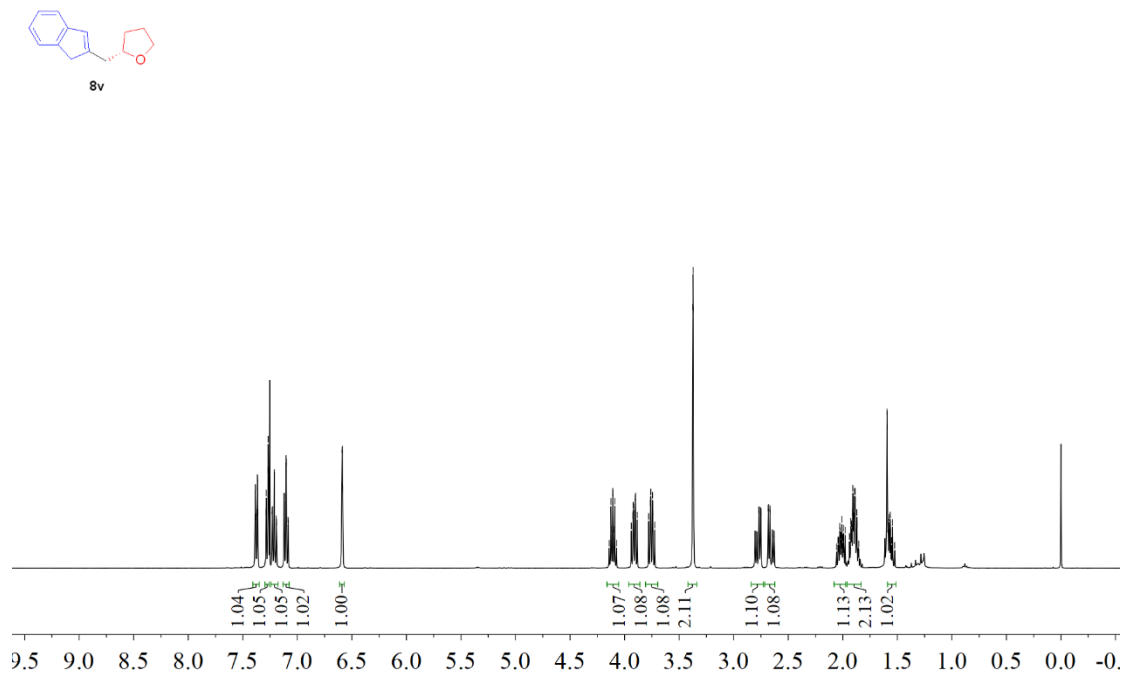

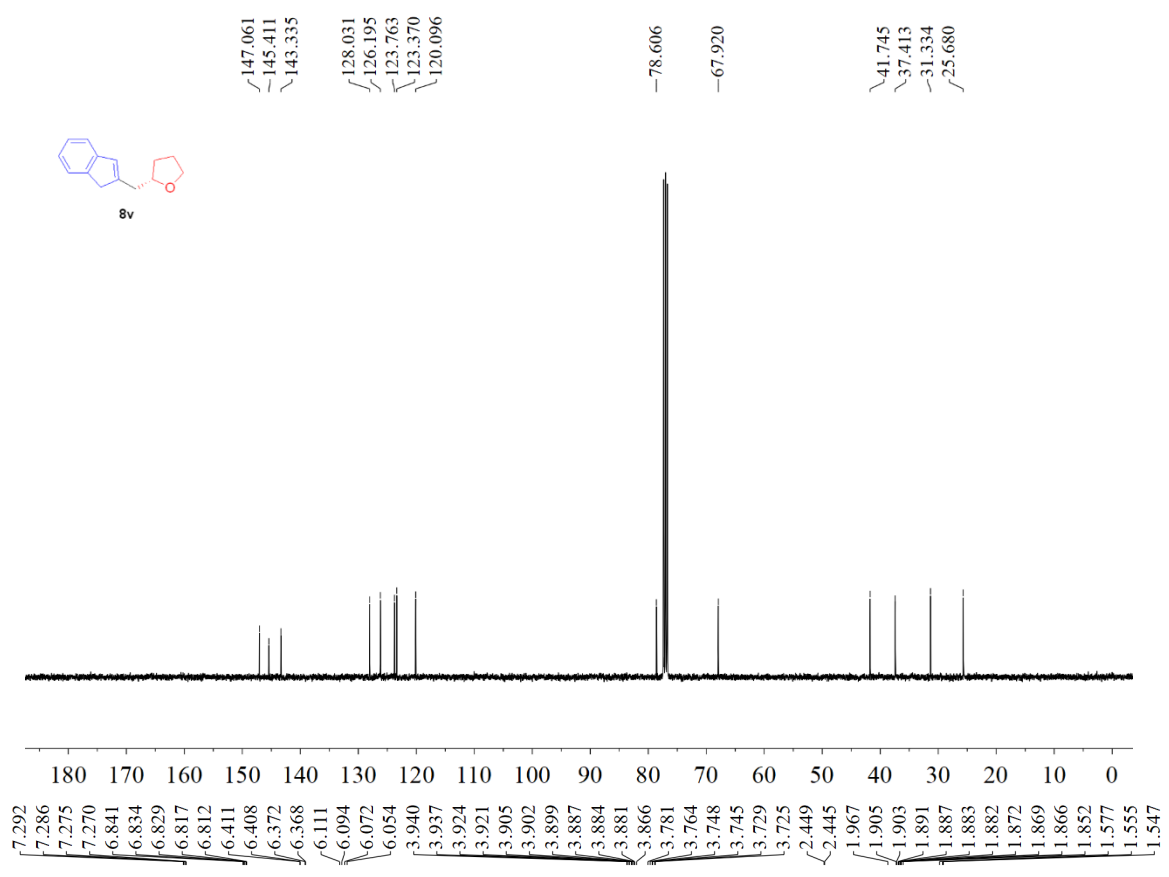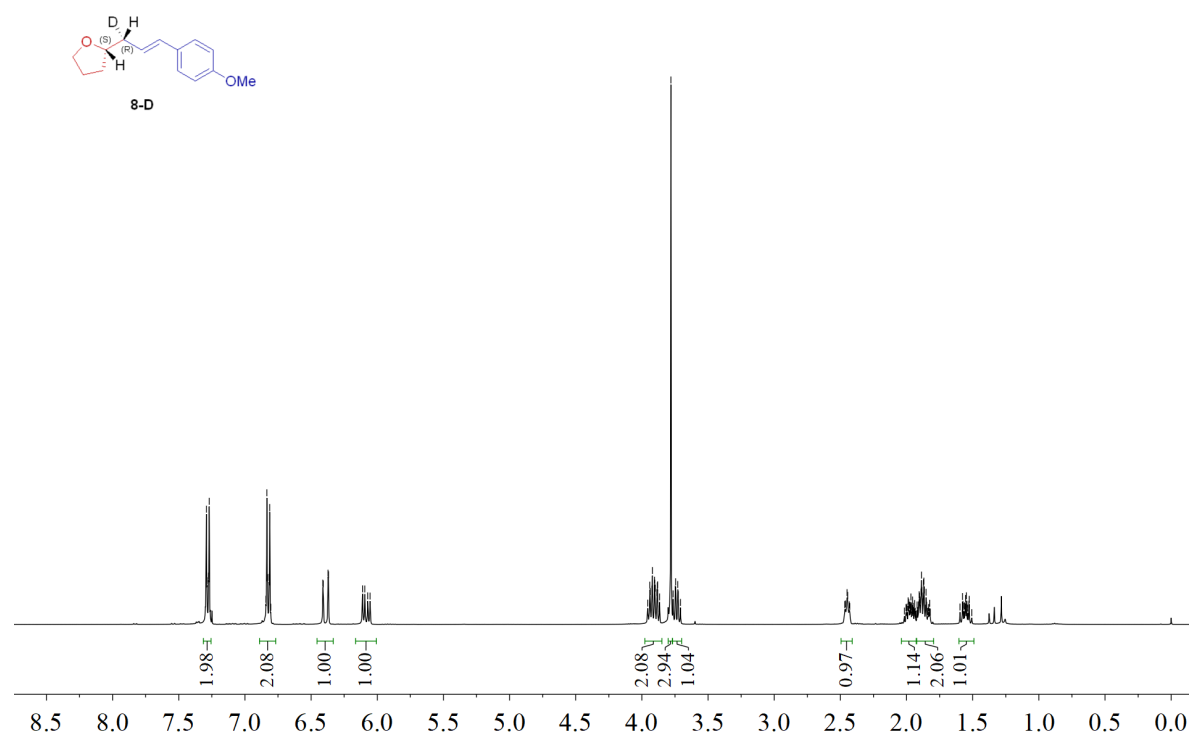

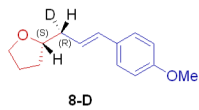

-158.70

131.21

130.34

127.08

124.41

-113.78

-78.80

-67.88

-55.17

38.97

38.77

38.58

-30.72

-25.65

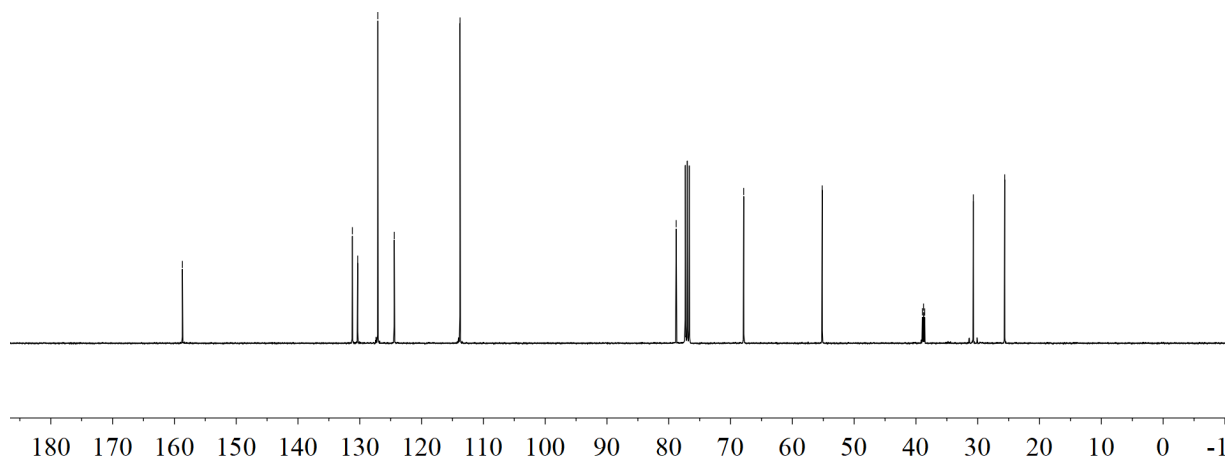

7.384  
7.380  
7.366  
7.362  
7.360  
7.352  
7.335  
7.331  
7.320  
7.316  
7.296  
7.283  
7.277  
7.273  
7.264  
7.258  
7.248  
7.242  
7.238  
7.234  
7.230  
7.224  
7.217  
7.213  
7.210  
7.205  
7.203  
7.198  
7.194  
7.188  
7.180  
7.042  
7.038  
7.025  
7.021  
7.018  
6.485  
6.343  
3.682  
3.673  
3.659  
3.650  
2.861  
2.828  
2.804  
2.787  
2.657  
2.654  
2.497  
1.609

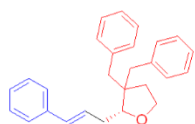

10a

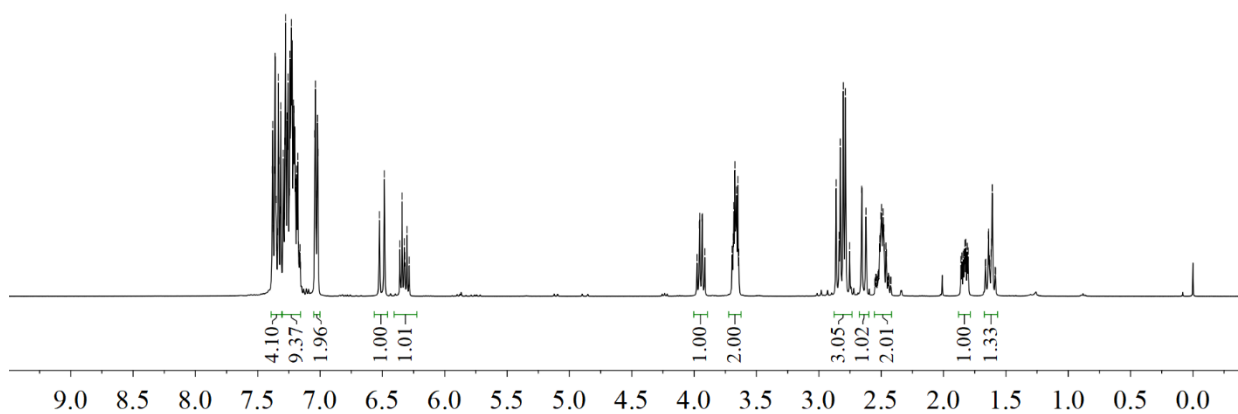

138.647  
137.615  
137.387  
131.550  
130.979  
130.933  
128.484  
128.229  
128.100  
127.959  
126.373  
126.191  
-82.823  
-65.082  
-48.010  
39.893  
38.715  
33.117  
31.661

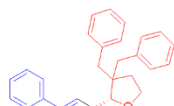

10a

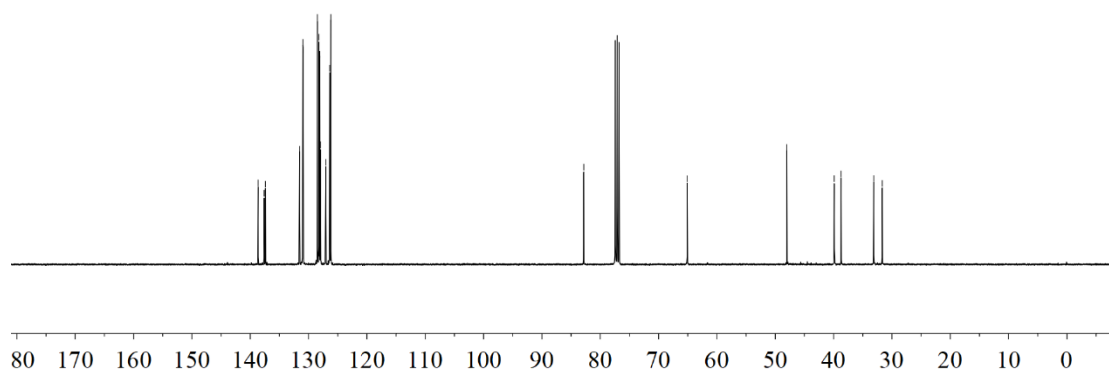

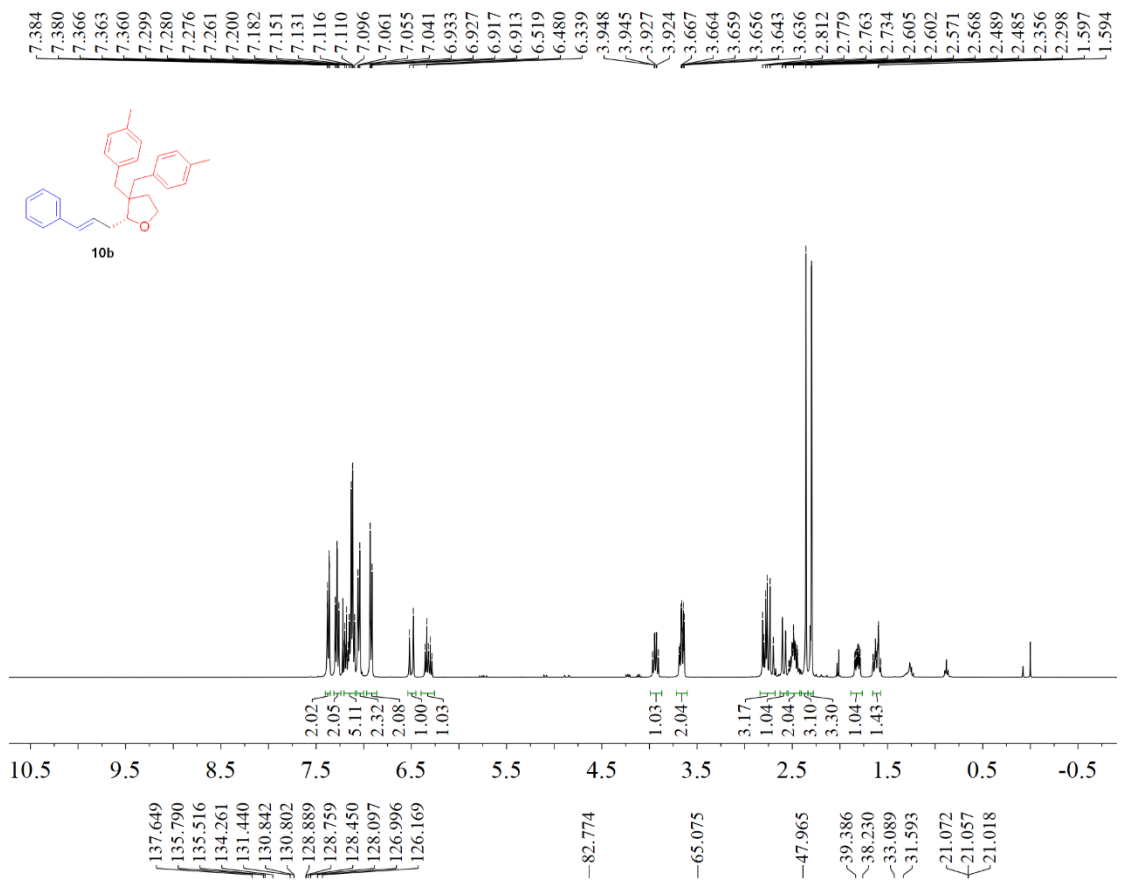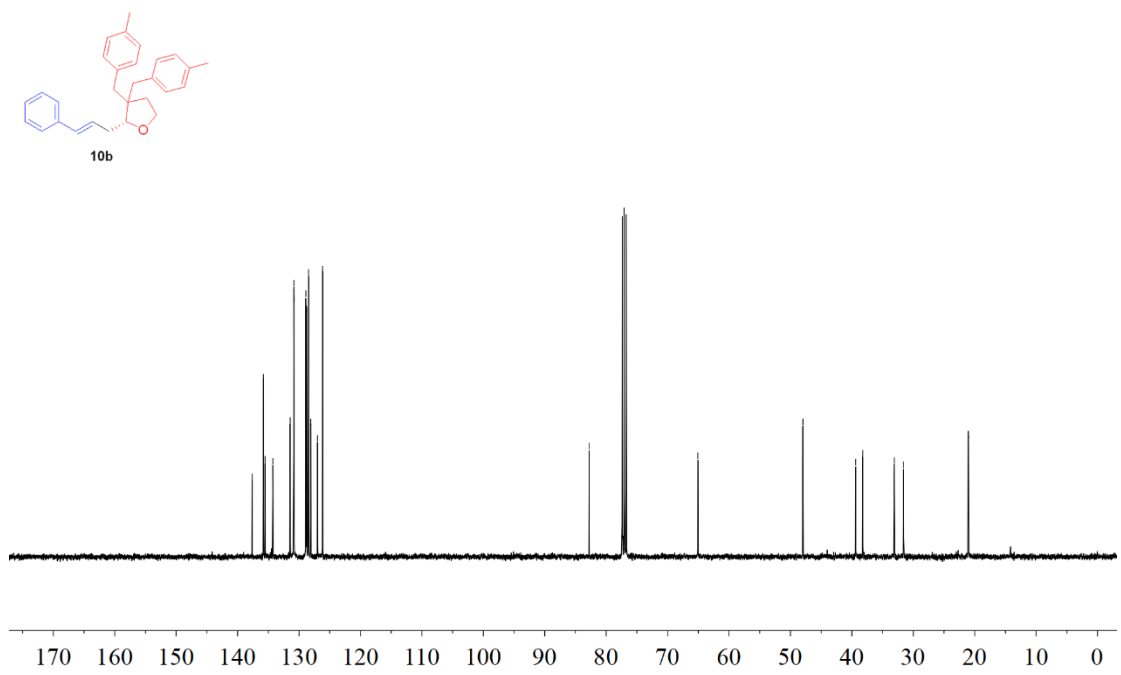

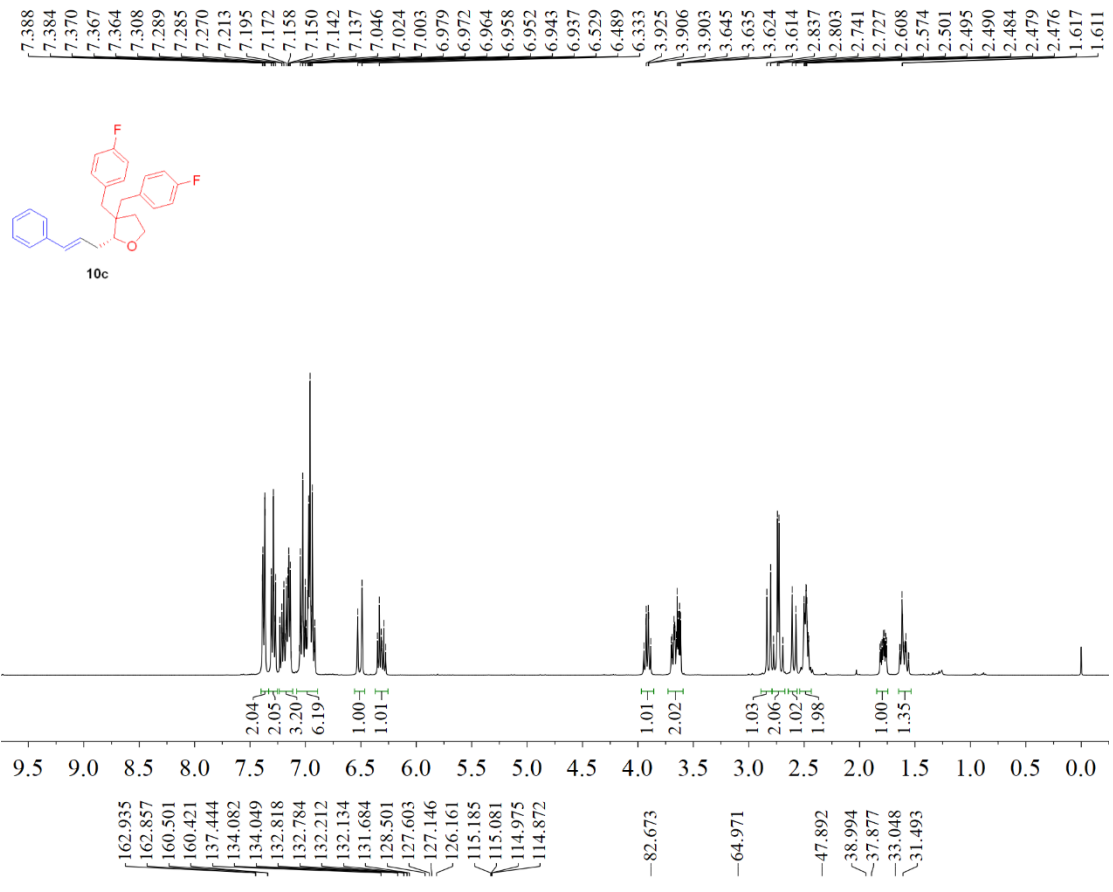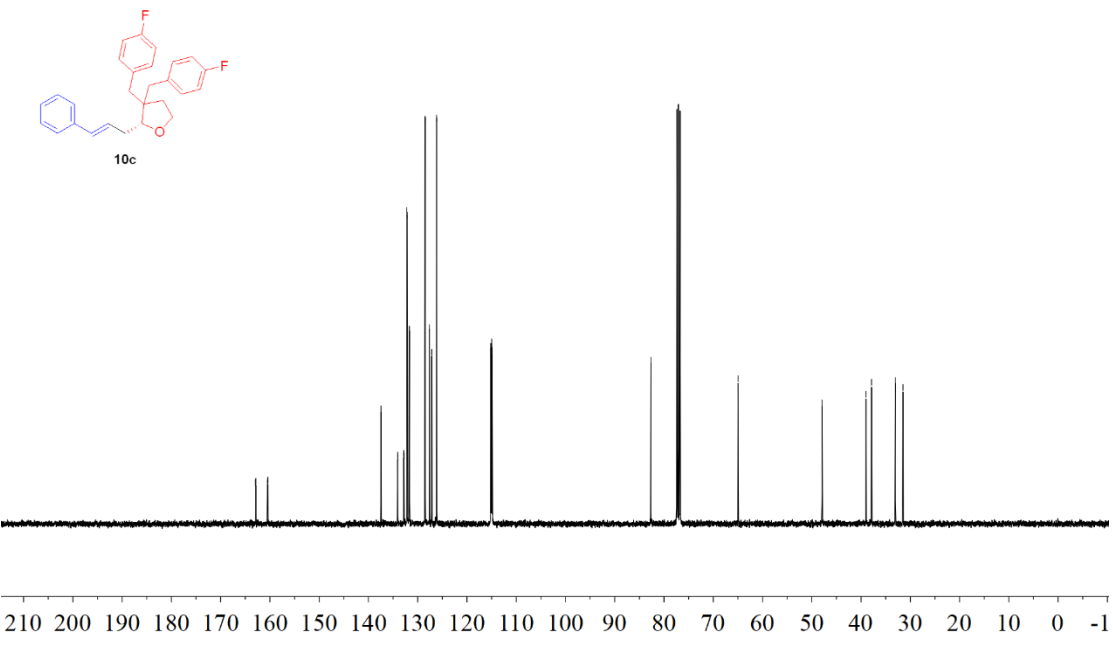



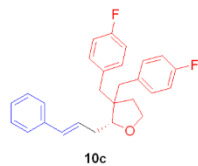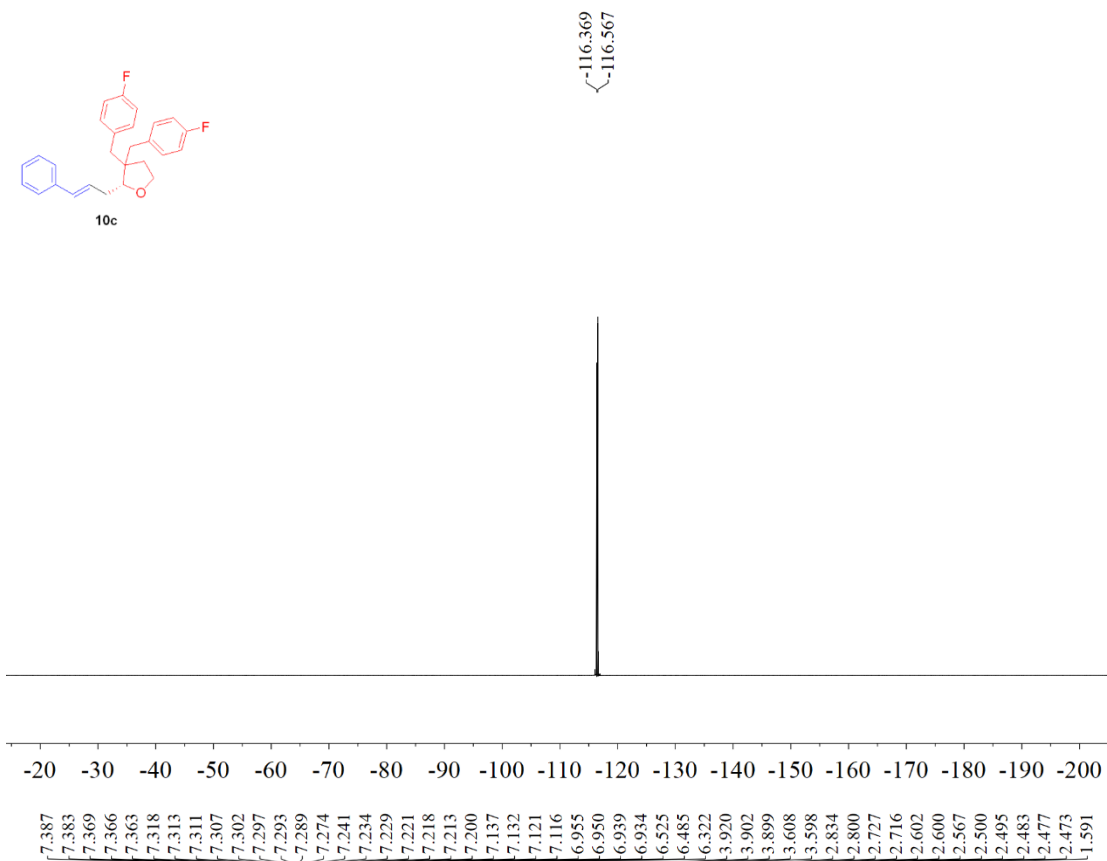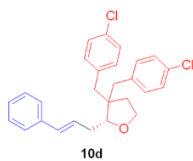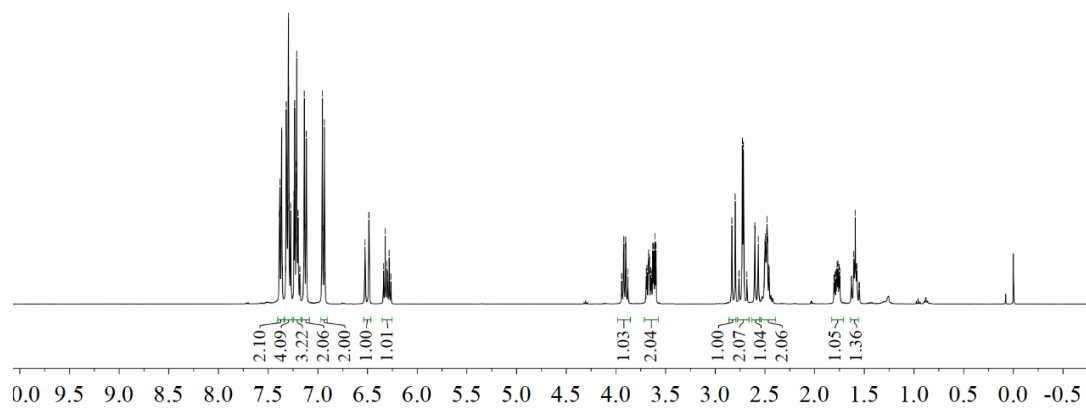

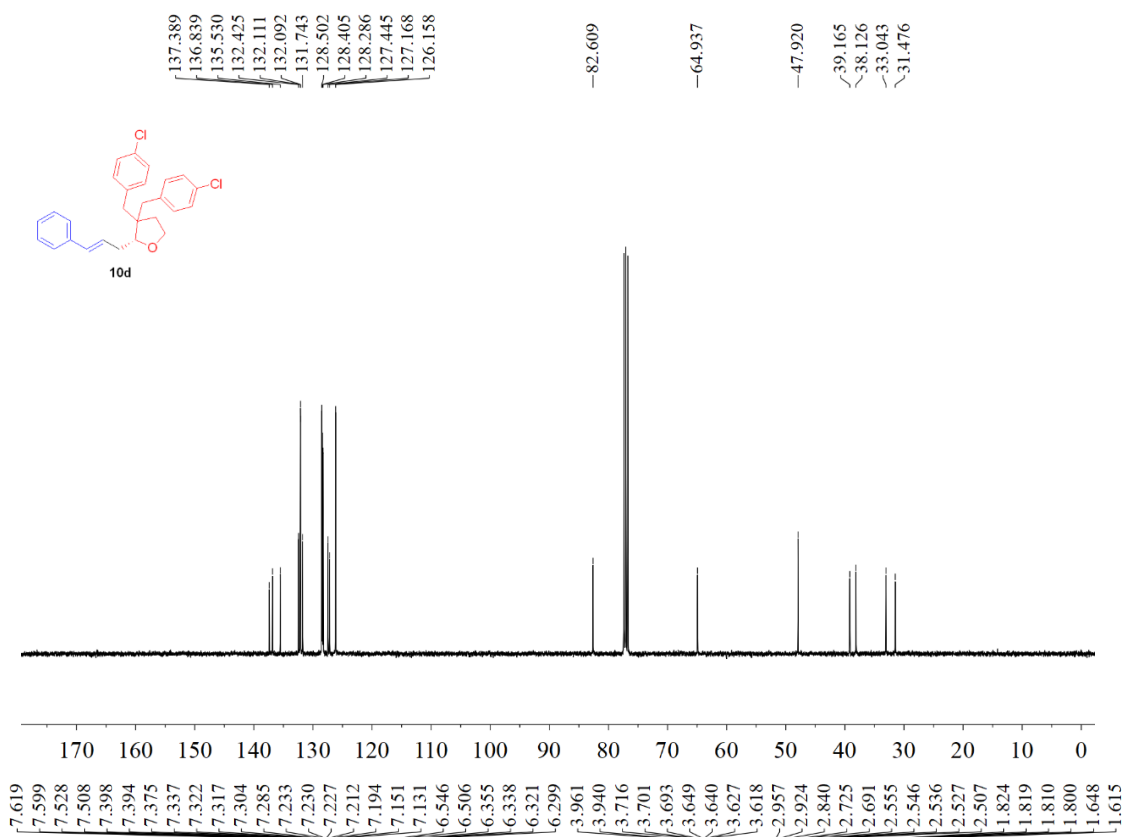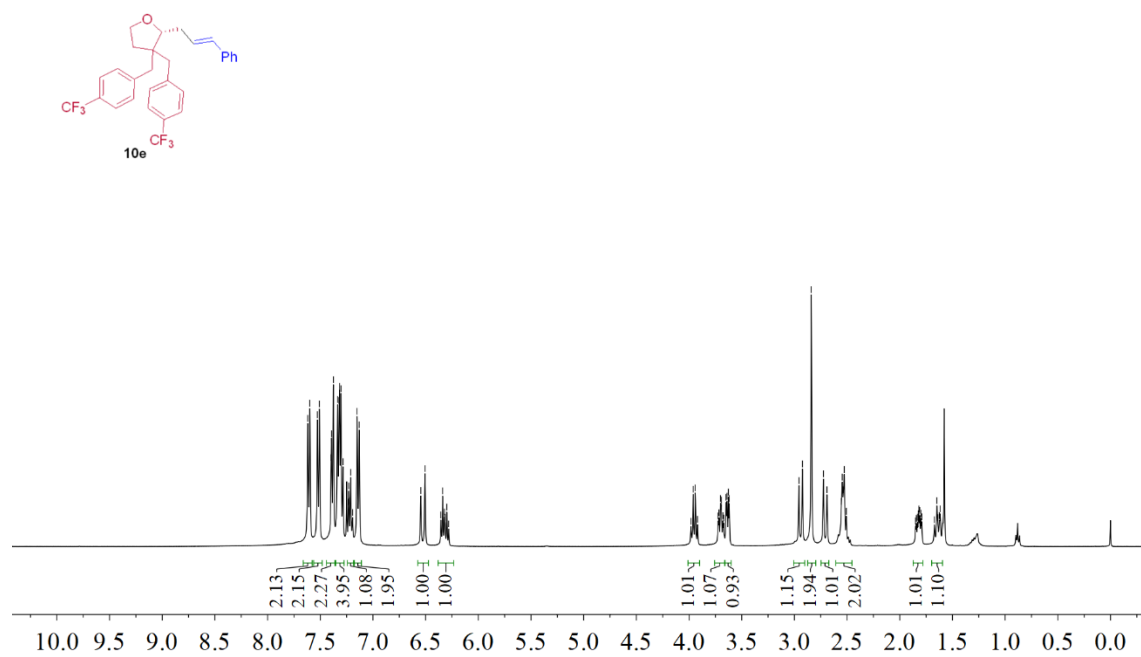

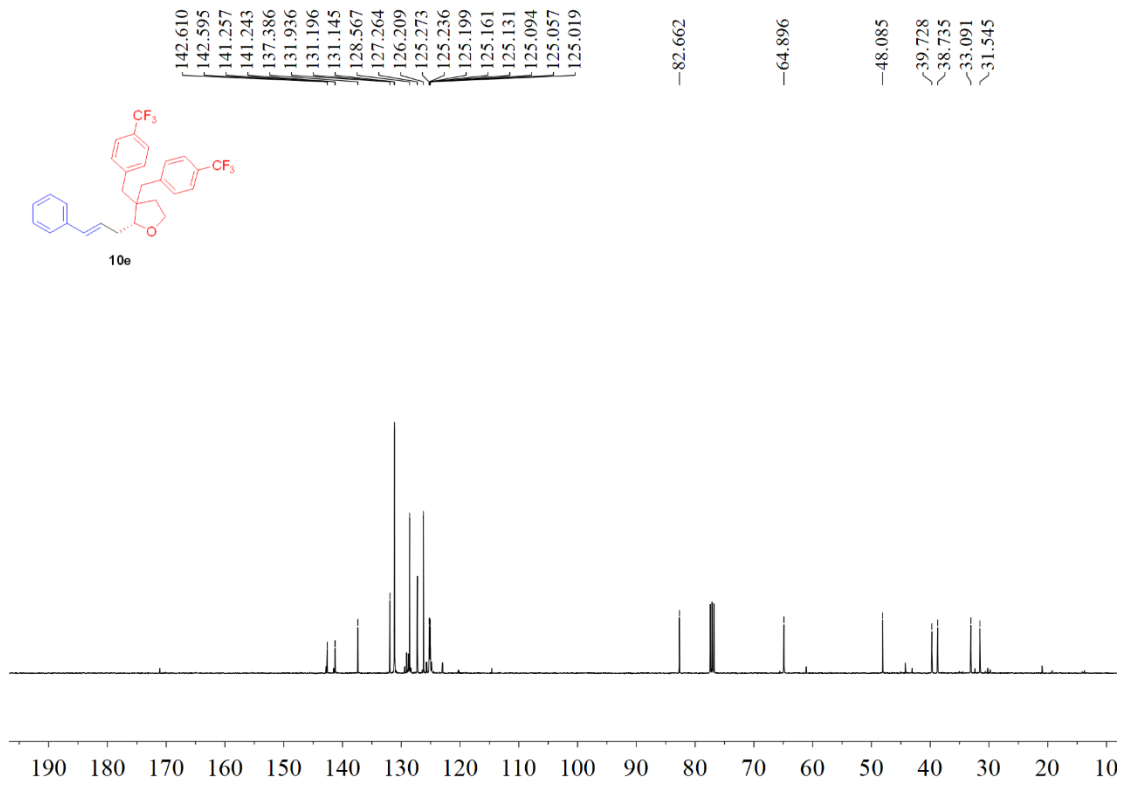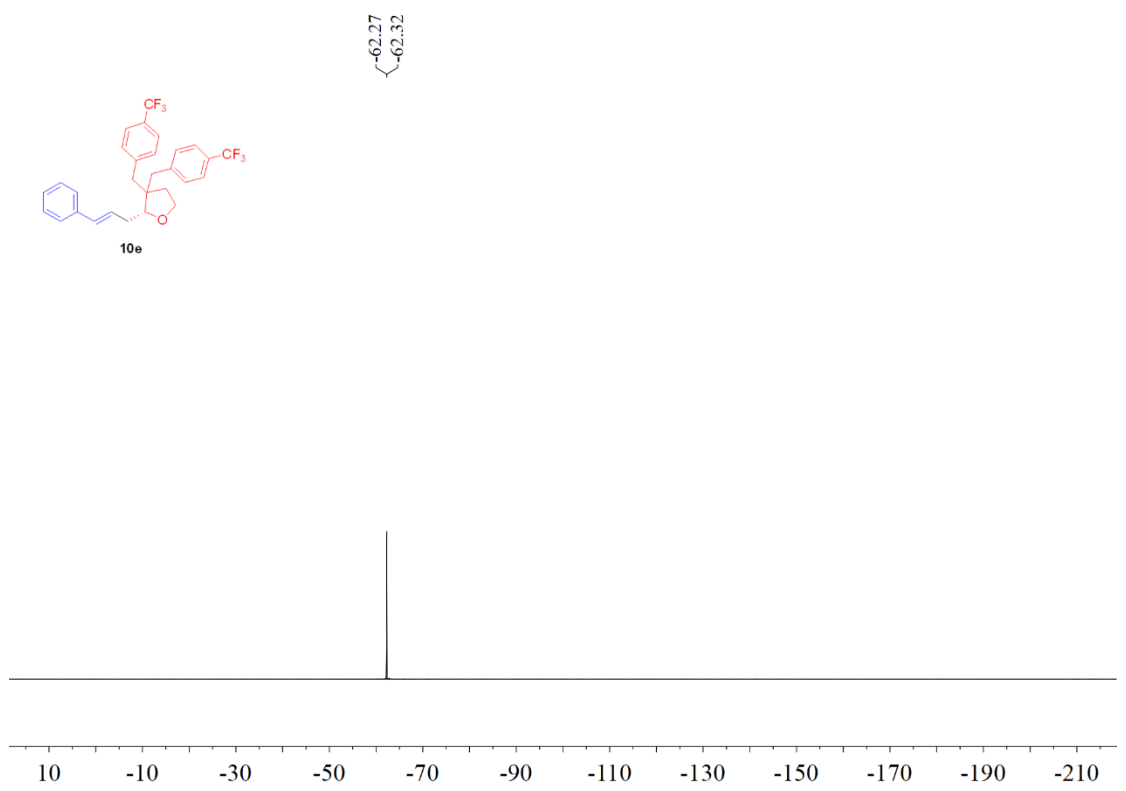

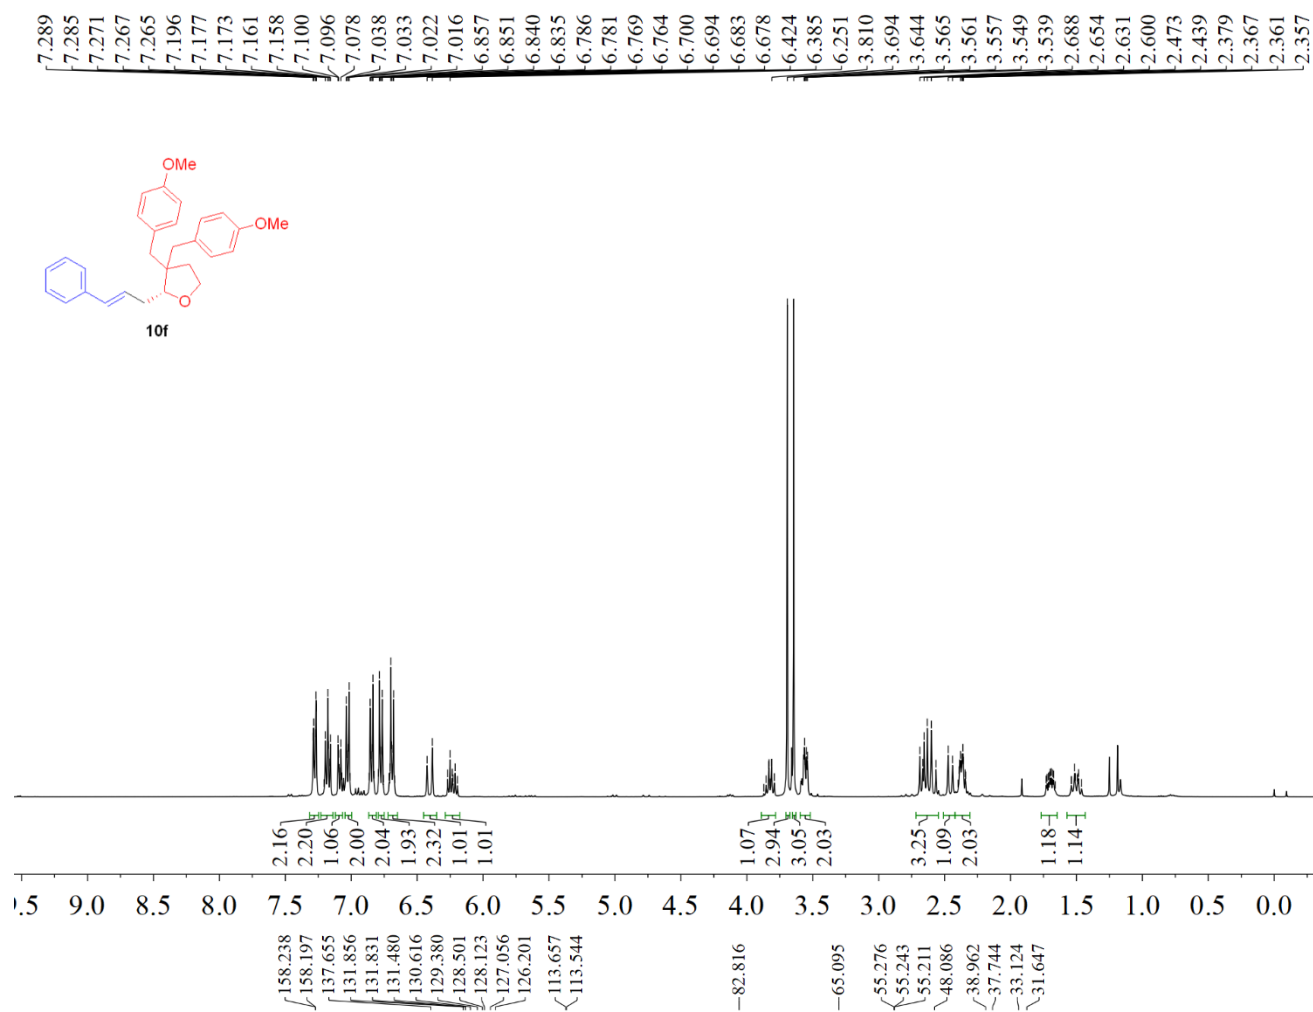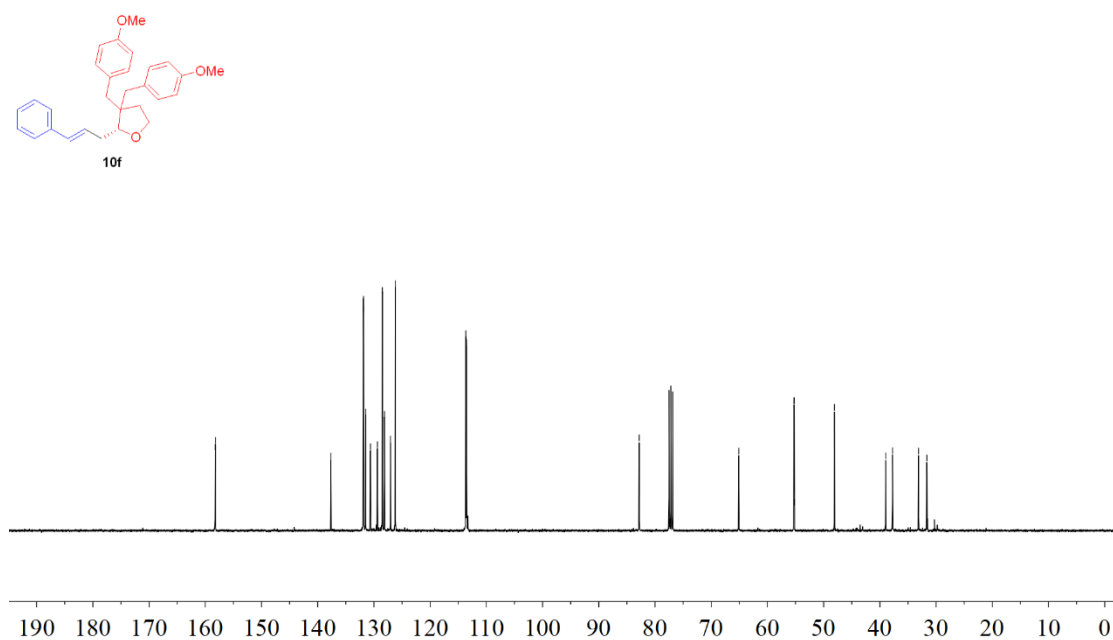

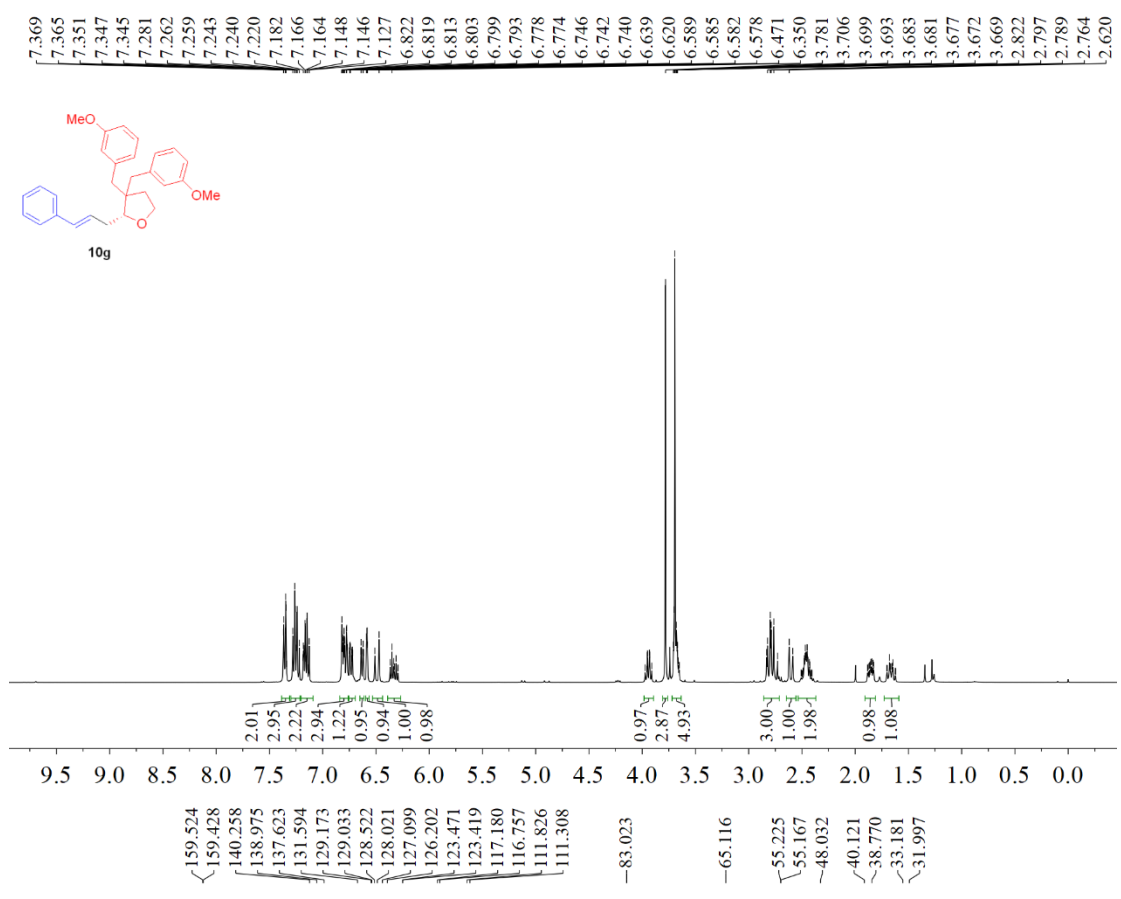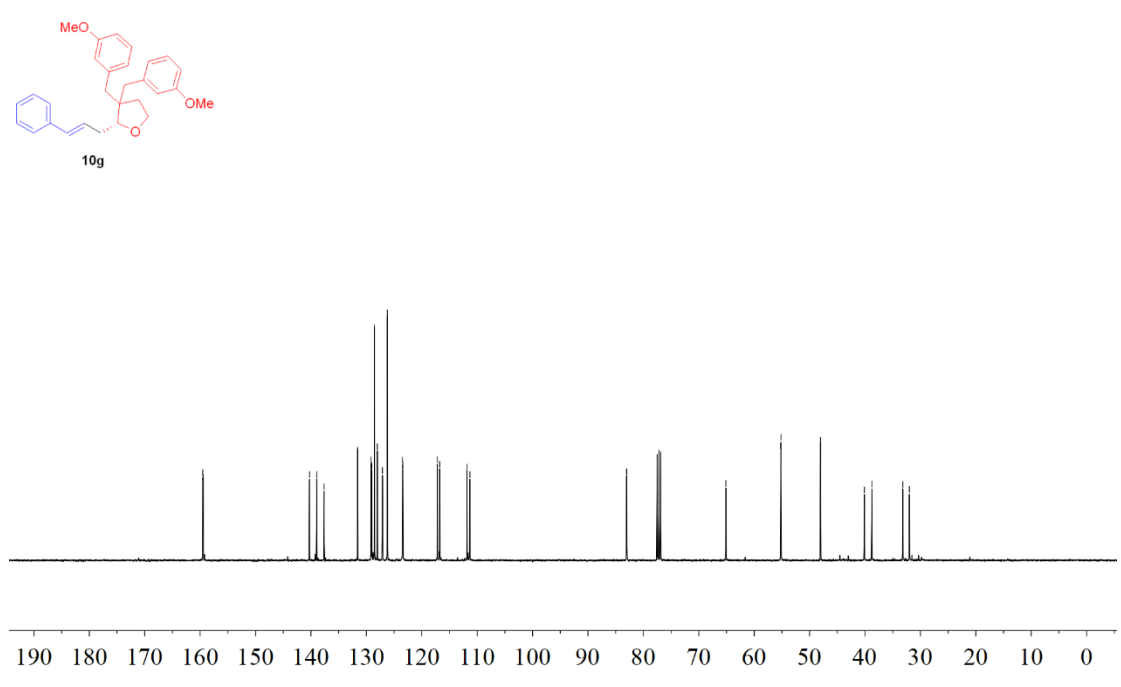

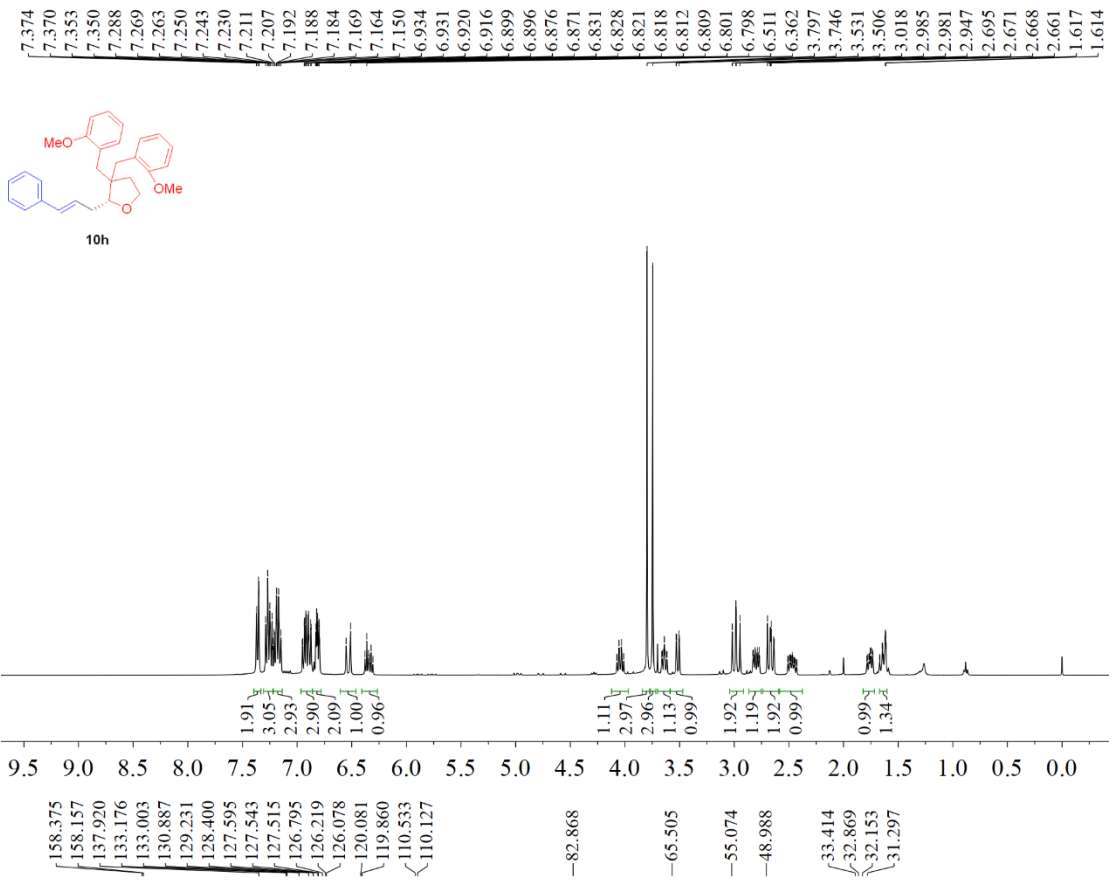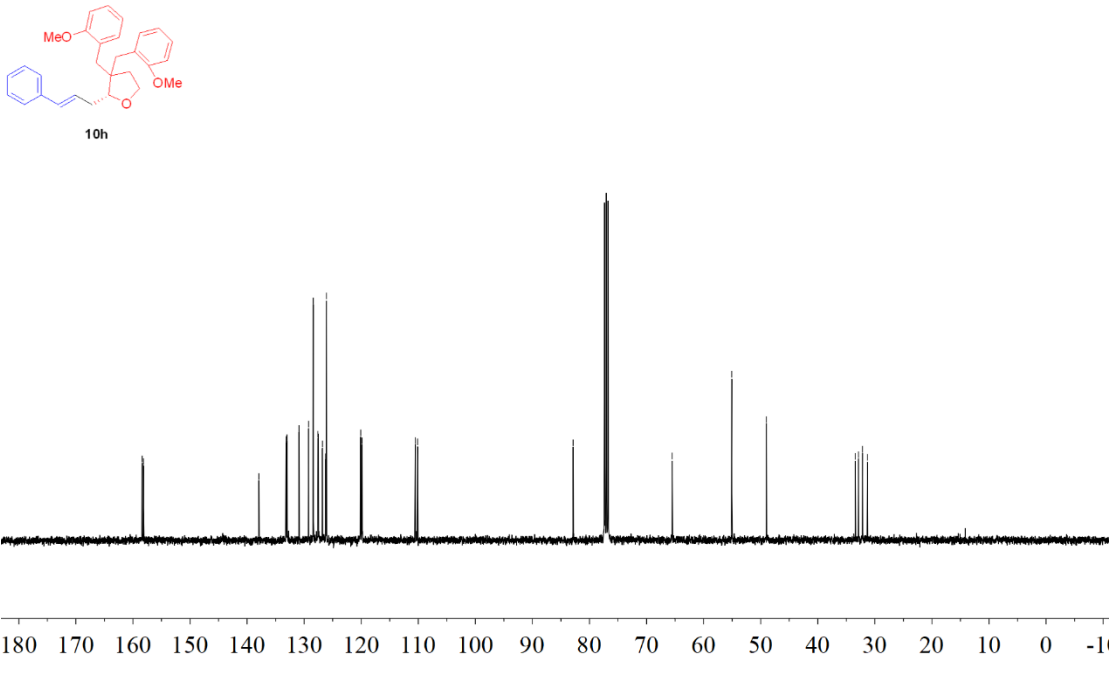

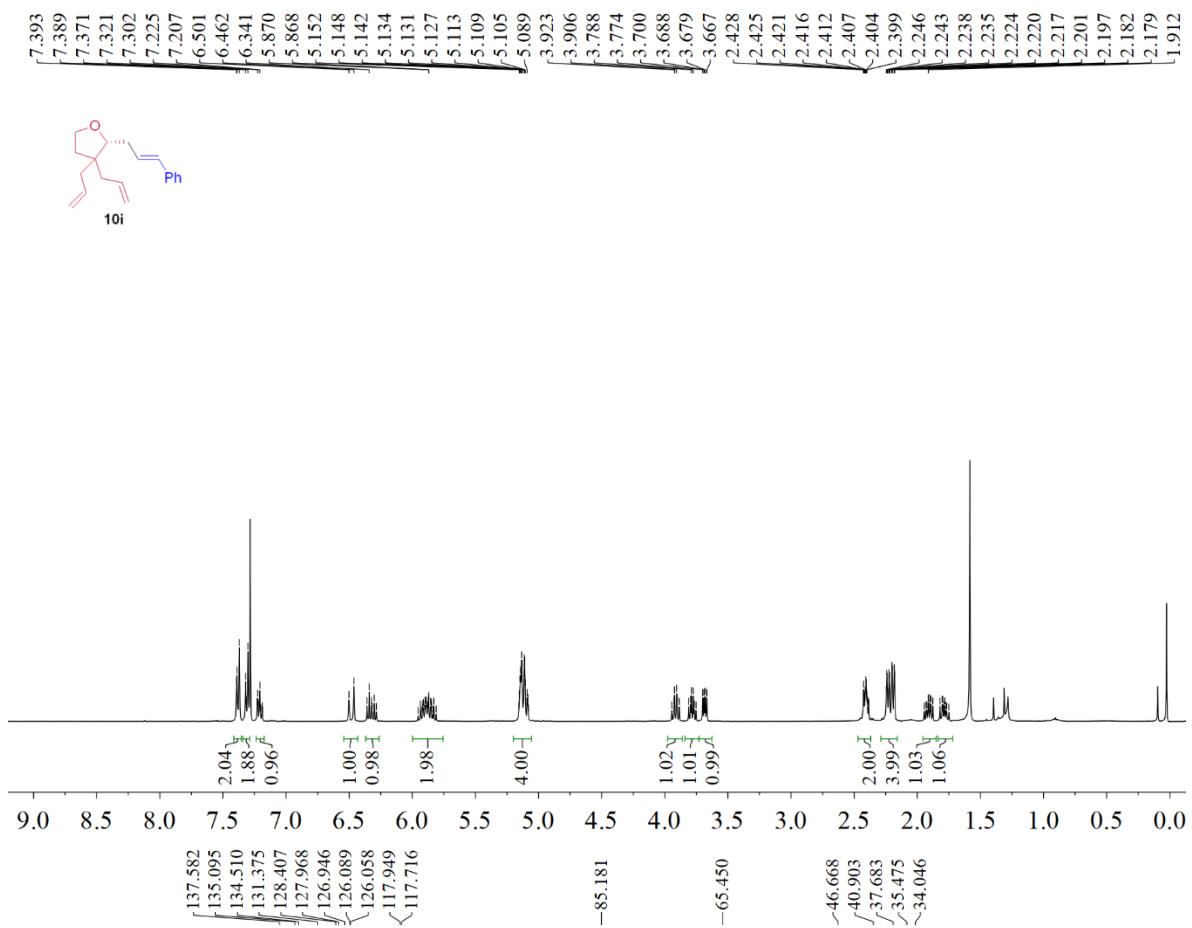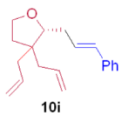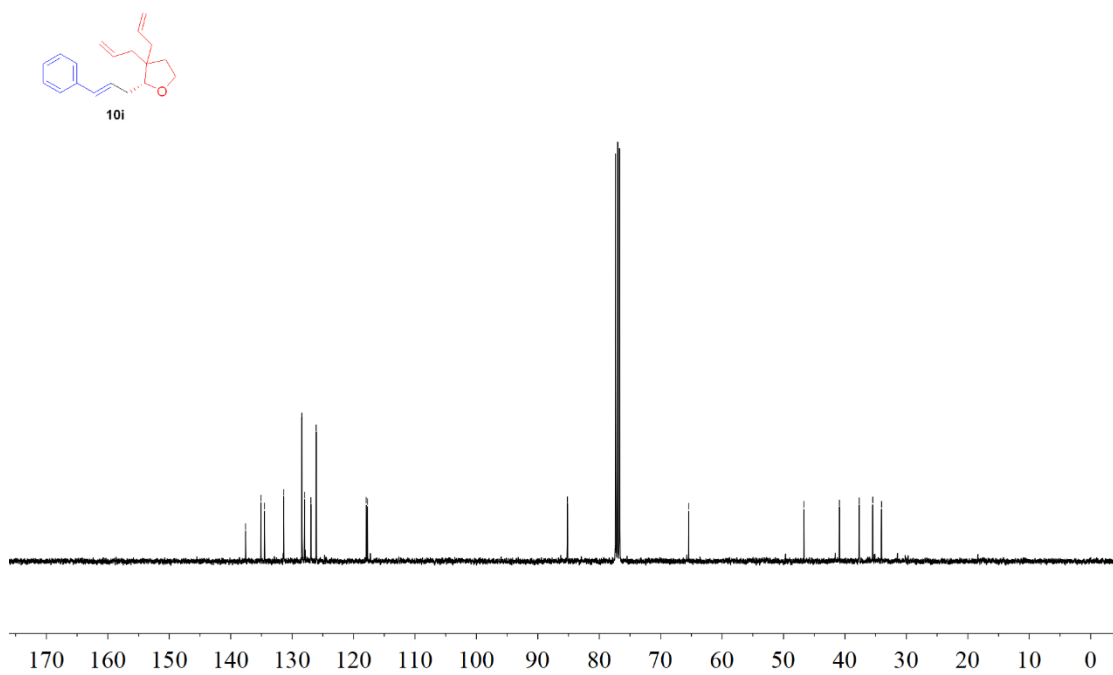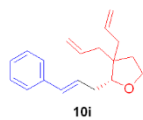

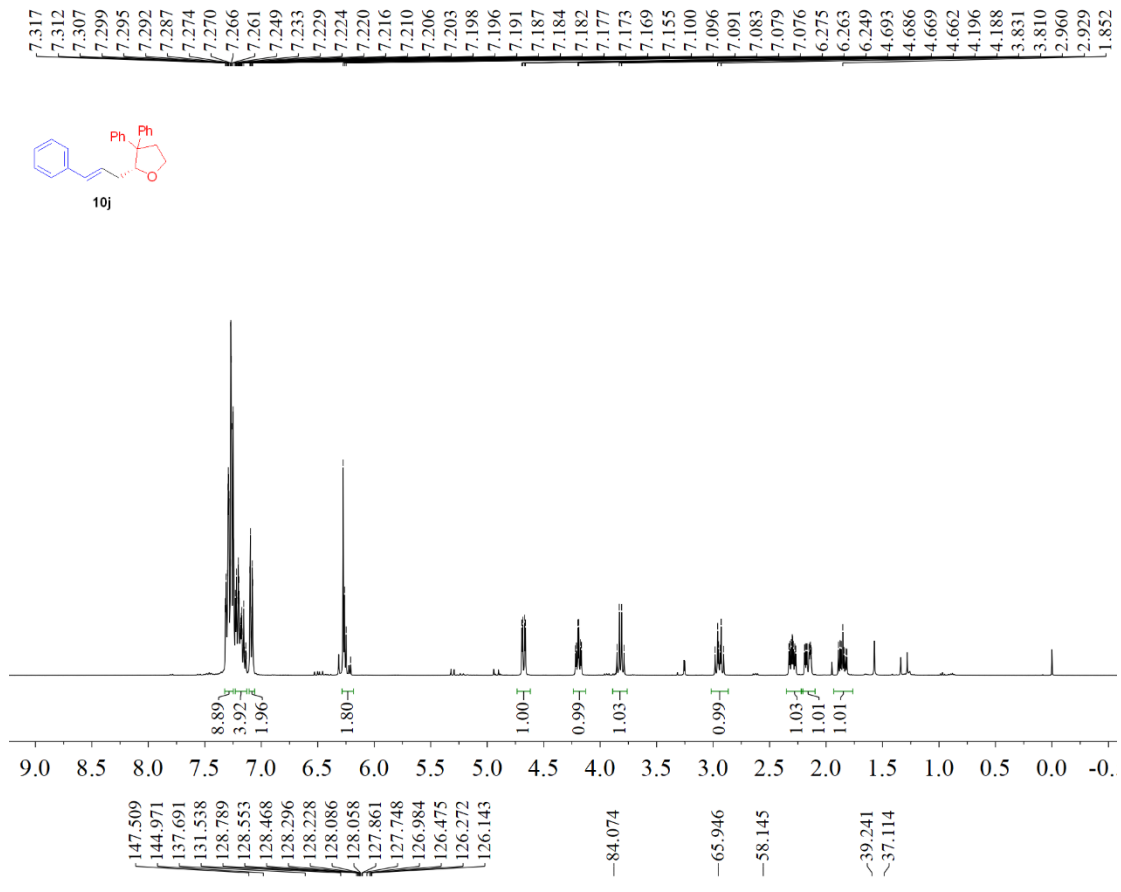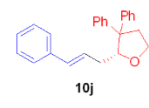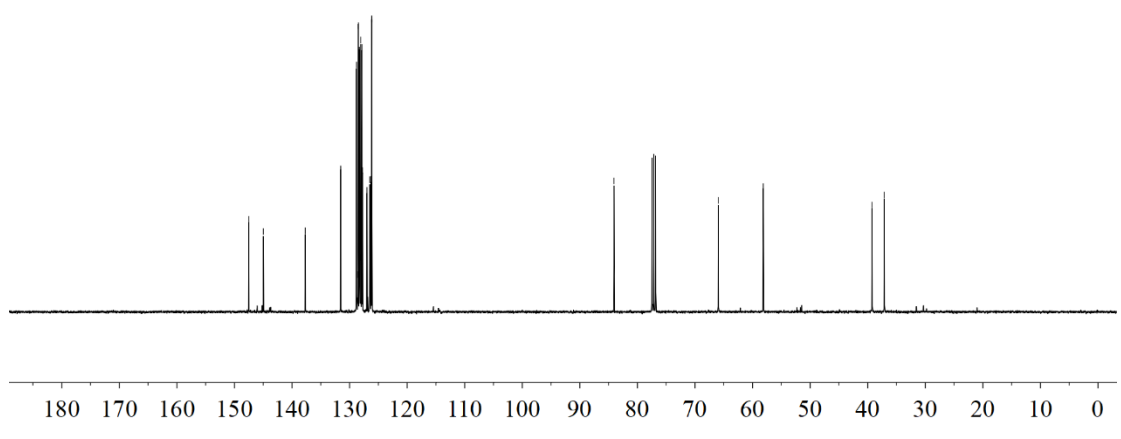



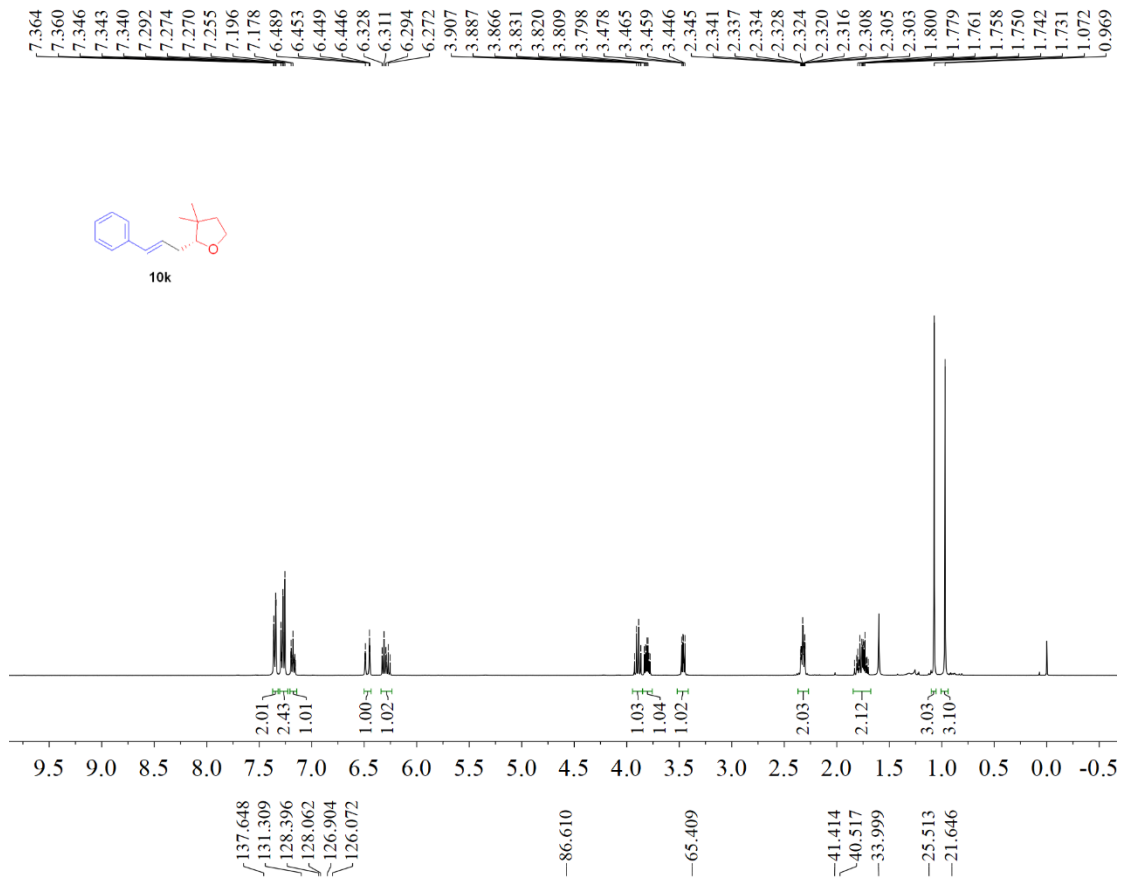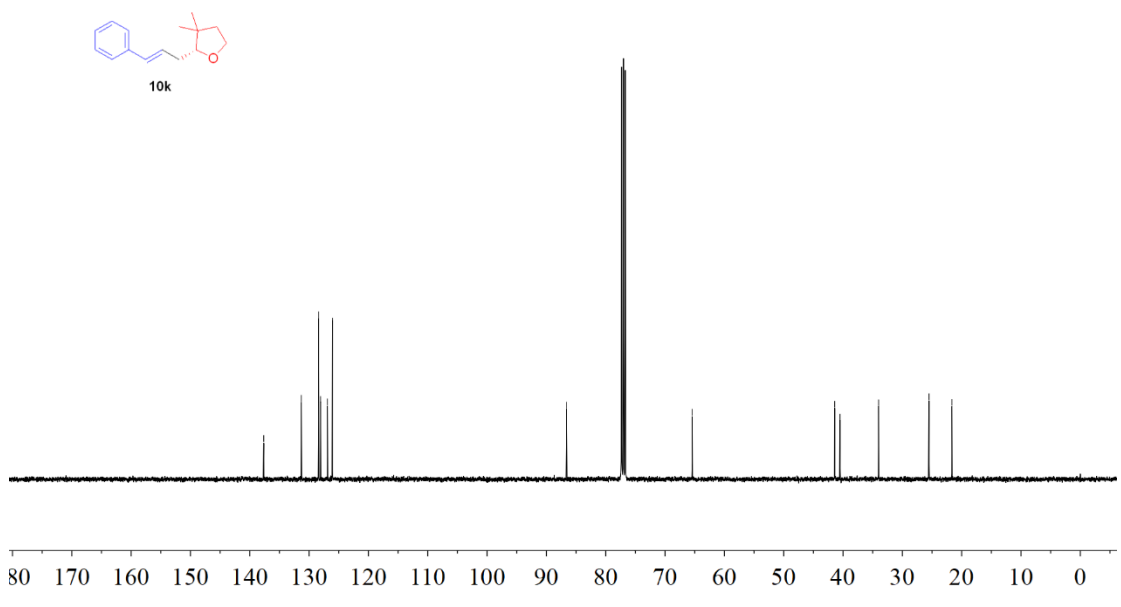

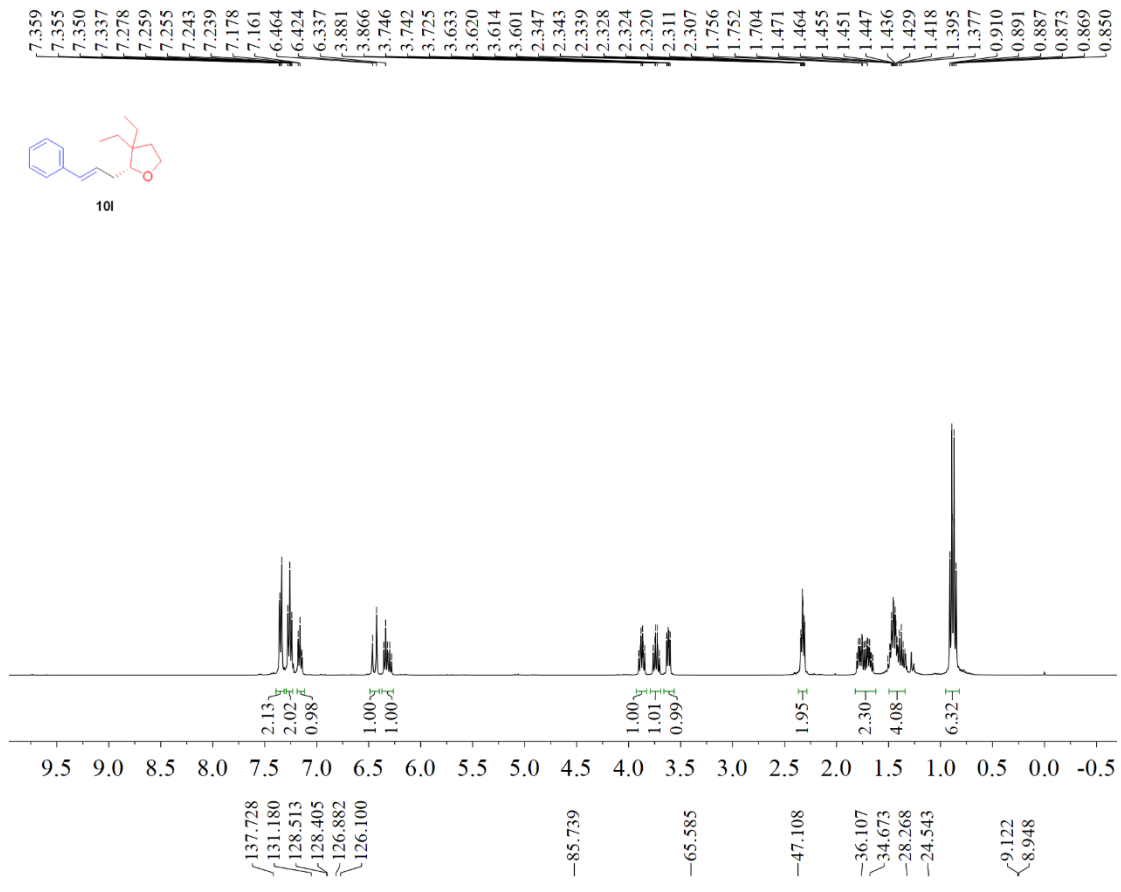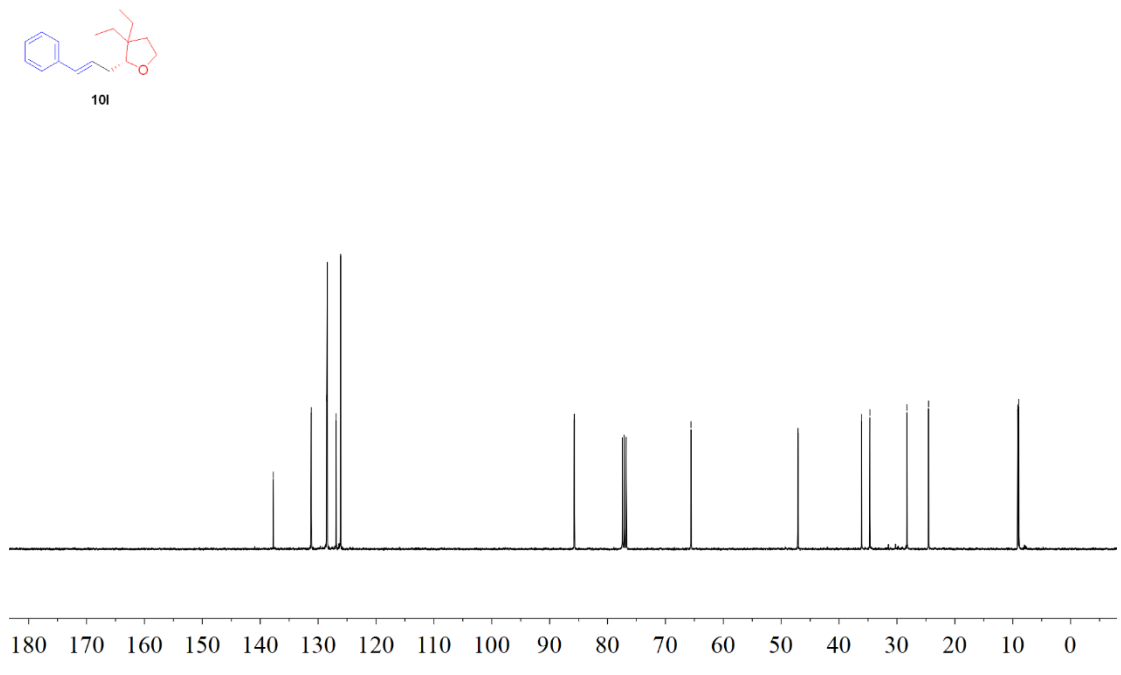

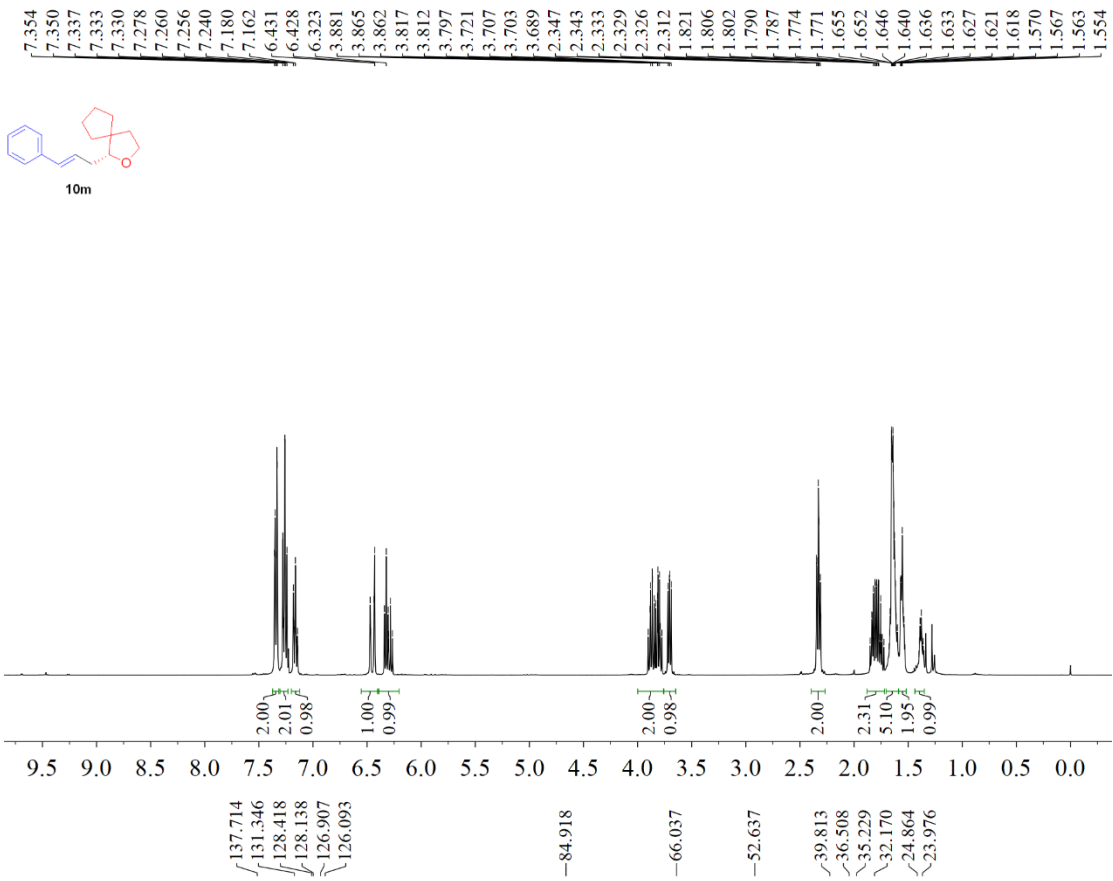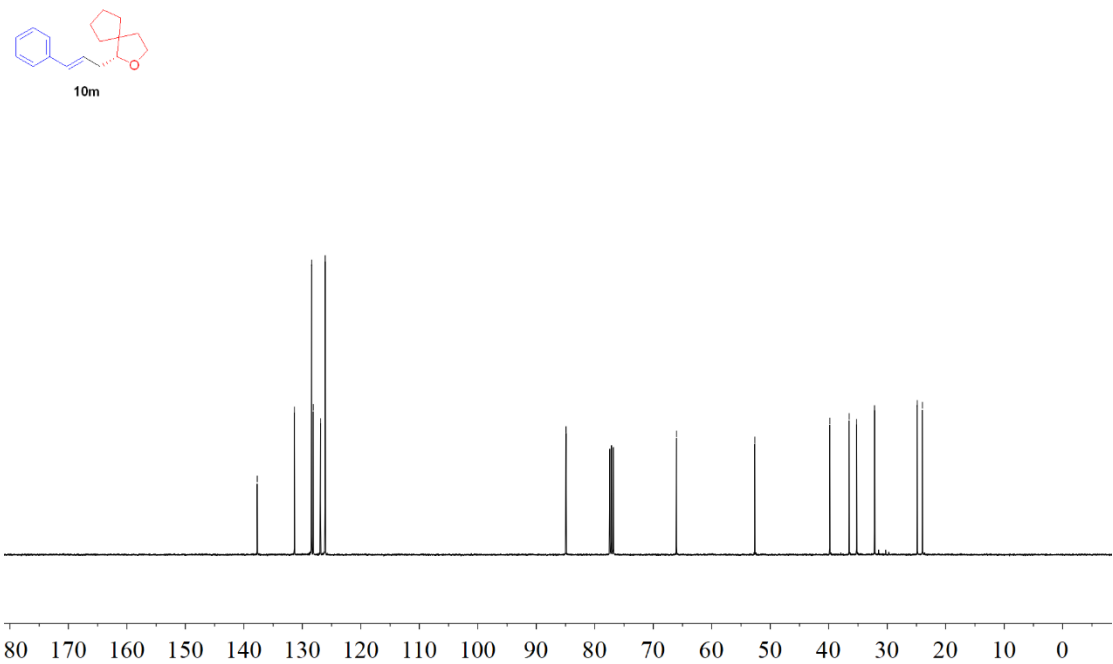

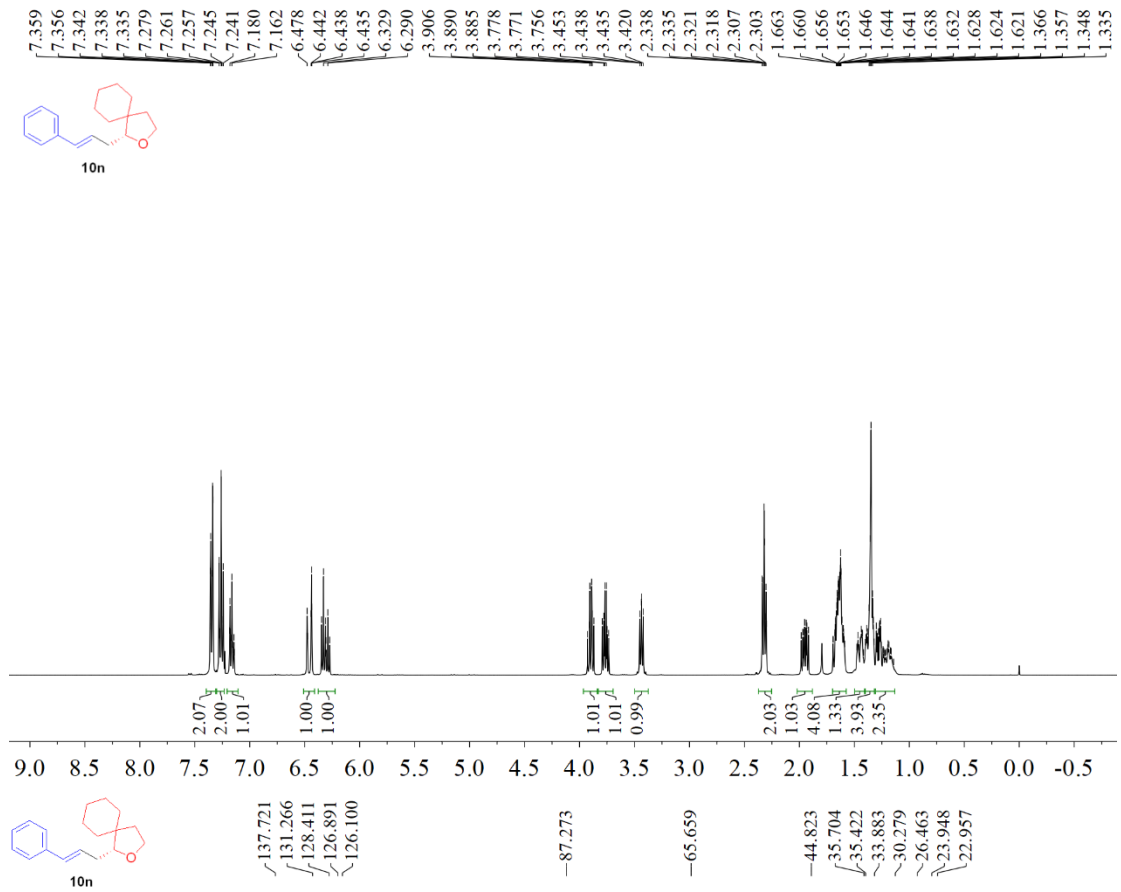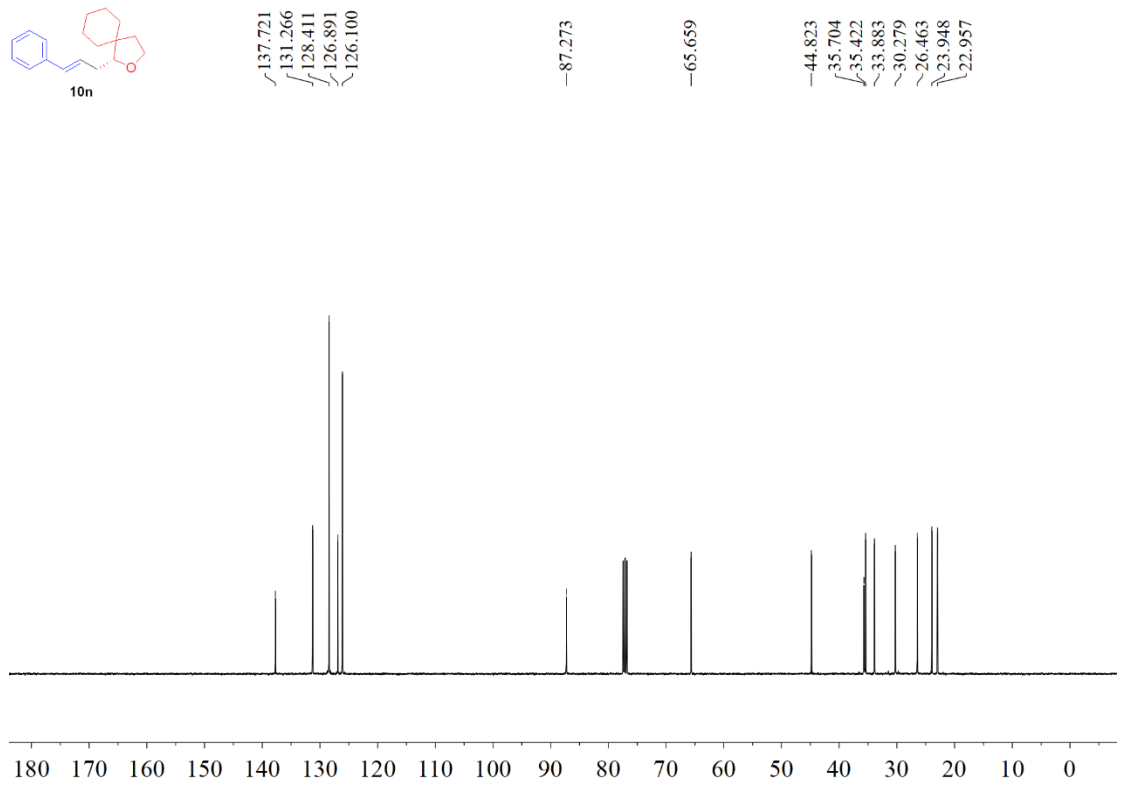

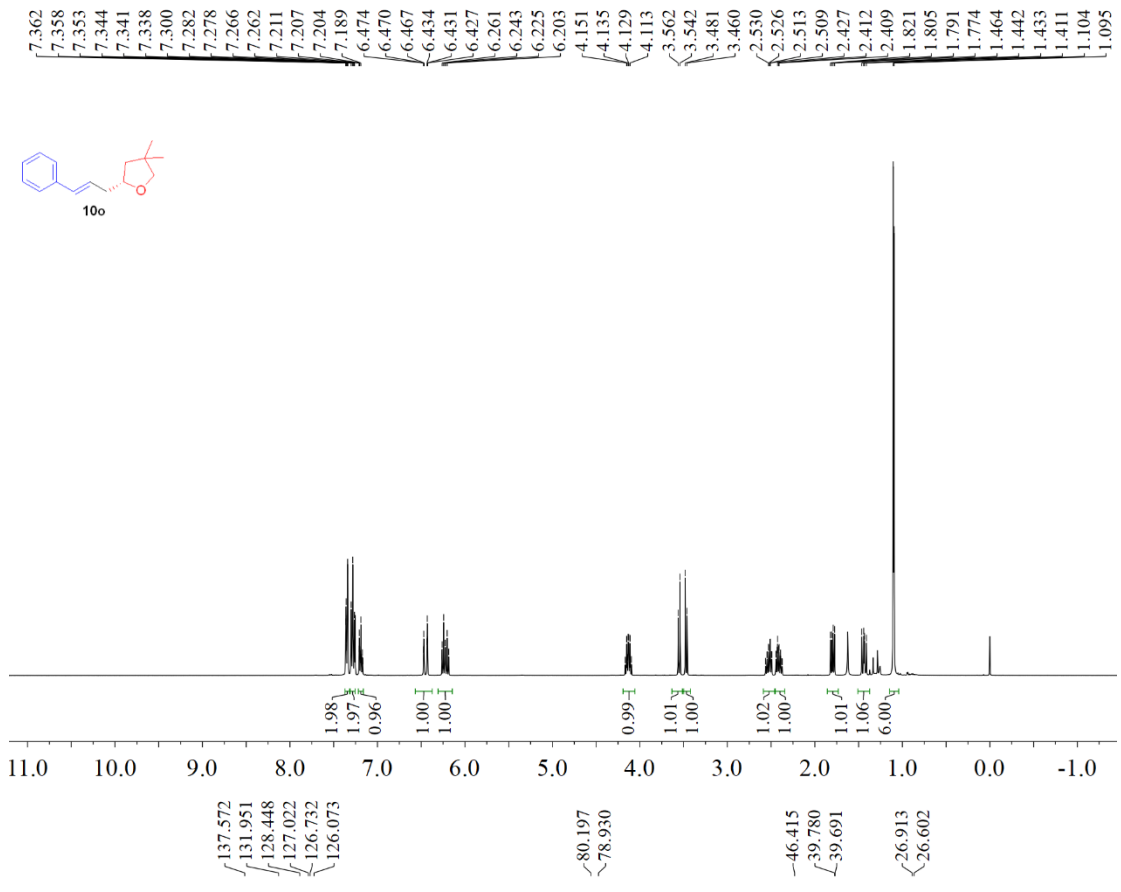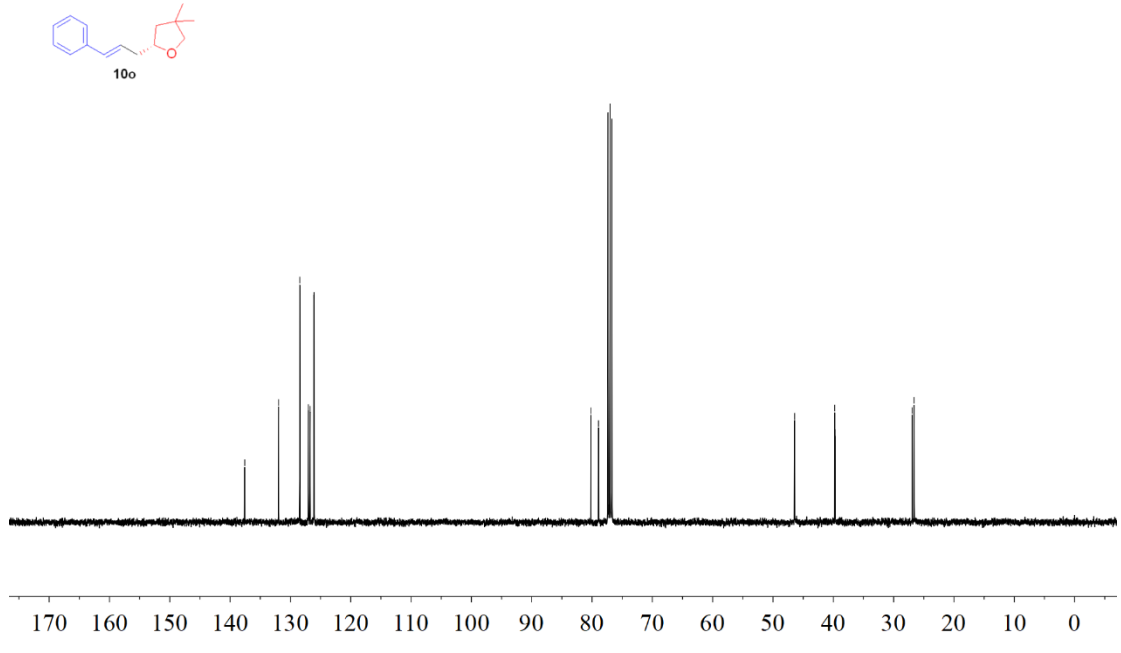

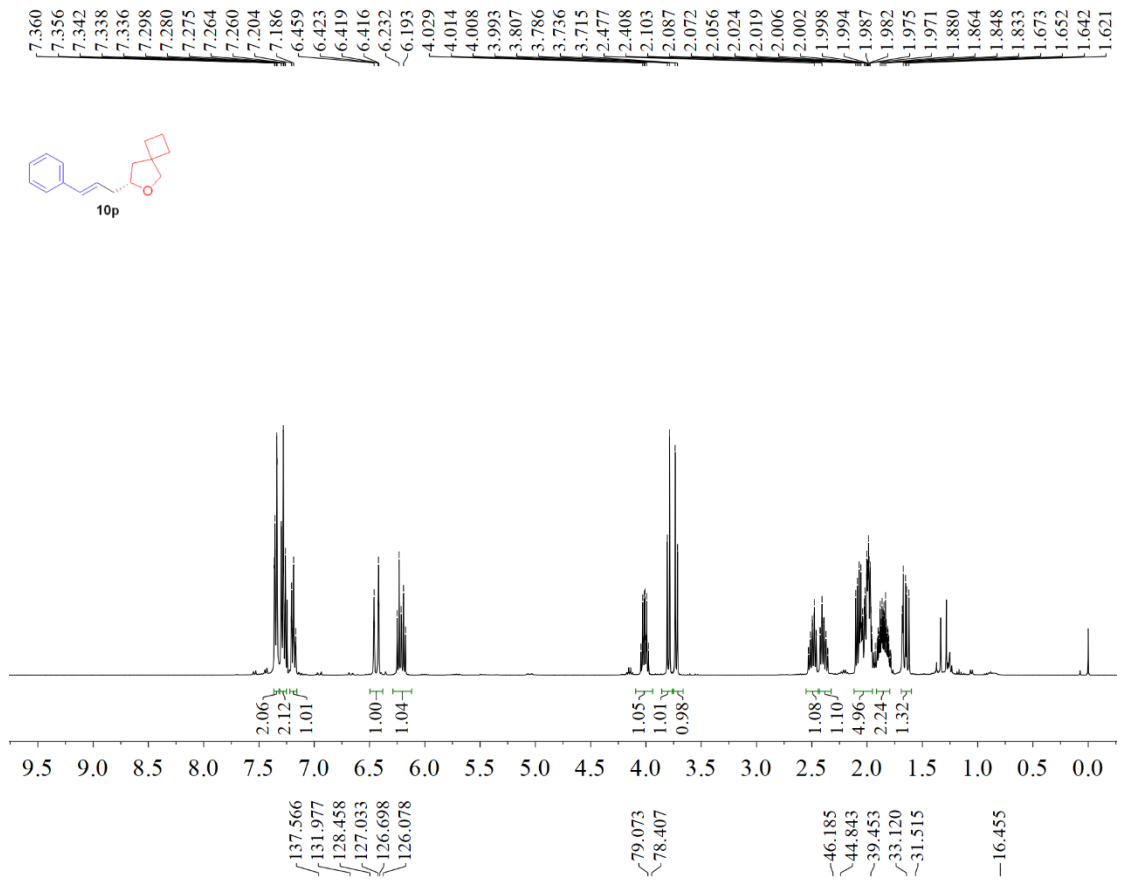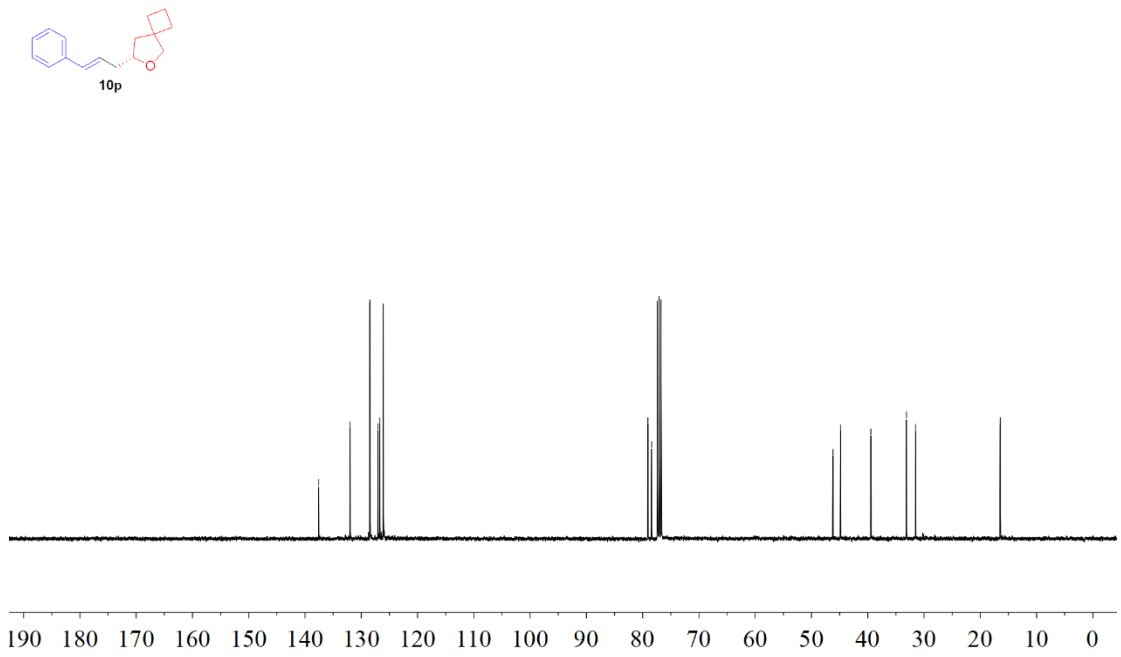

7.373  
7.369  
7.356  
7.352  
7.349  
7.309  
7.287  
7.271  
7.216  
7.213  
7.209  
7.195  
6.441  
6.438  
6.405  
6.401  
6.398  
6.288  
6.269  
6.251  
6.248  
6.230  
3.883  
3.868  
3.866  
3.852  
3.836  
2.420  
2.418  
2.402  
2.399  
1.955  
1.939  
1.936  
1.921  
1.918  
1.906  
1.904  
1.873  
1.854  
1.843  
1.825  
1.676  
1.667  
1.662  
1.656  
1.647  
1.641  
1.233

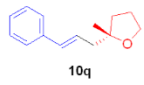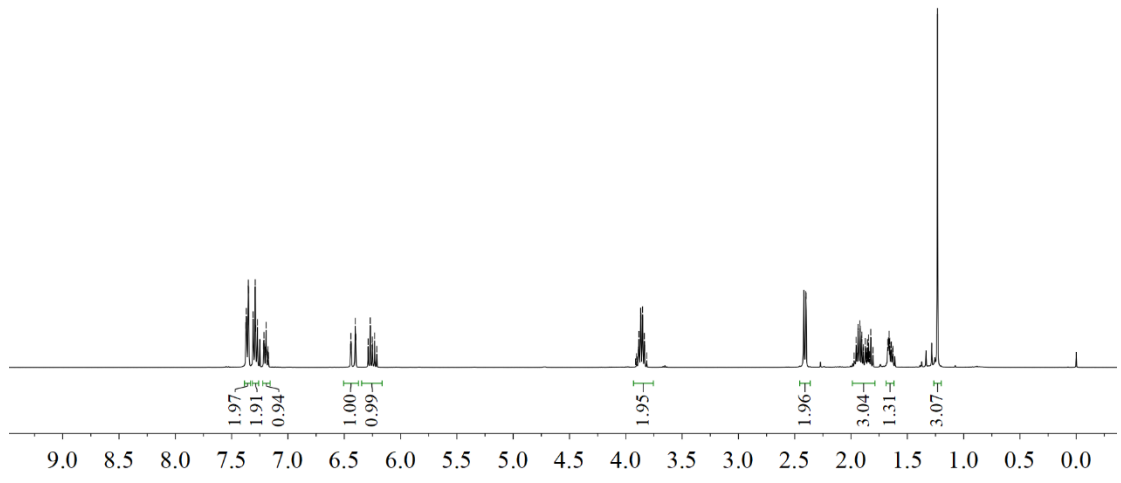

137.674  
132.519  
128.481  
127.009  
126.789  
126.073  
-82.586  
-67.466  
-44.849  
-36.280  
26.320  
26.147

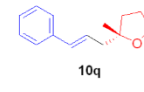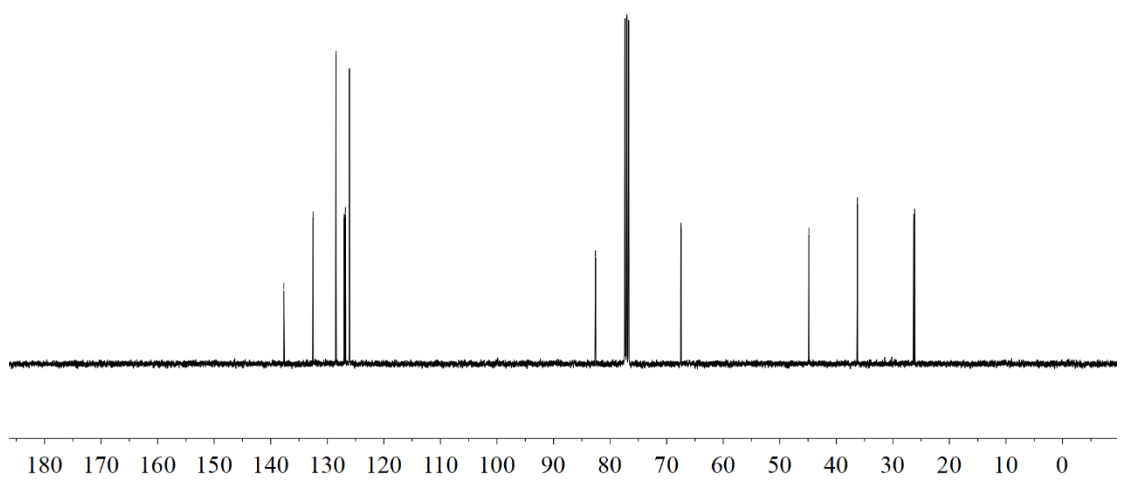

7.326  
7.320  
7.312  
7.305  
7.291  
7.226  
7.217  
7.210  
6.519  
6.490  
5.741  
5.711  
4.063  
4.048  
4.043  
4.028  
2.660  
2.642  
2.507  
2.502  
1.989  
1.730  
1.719  
1.708  
1.704  
1.697  
1.684  
1.679  
1.674  
1.665  
1.654  
1.635  
1.579  
1.572  
1.570  
1.550  
1.536  
1.529  
1.526  
1.518  
1.505  
1.492  
1.372  
1.357  
1.350  
1.344  
1.338  
1.334  
1.316  
1.285

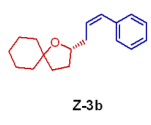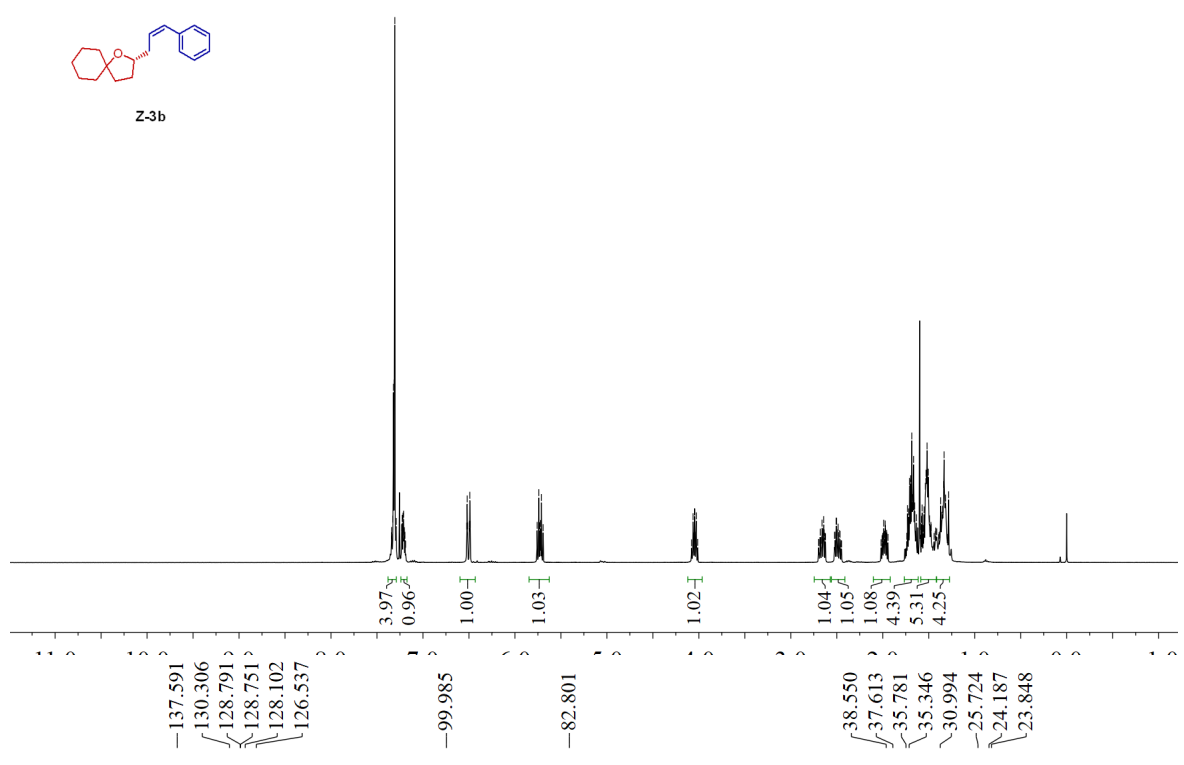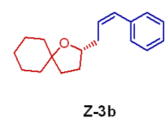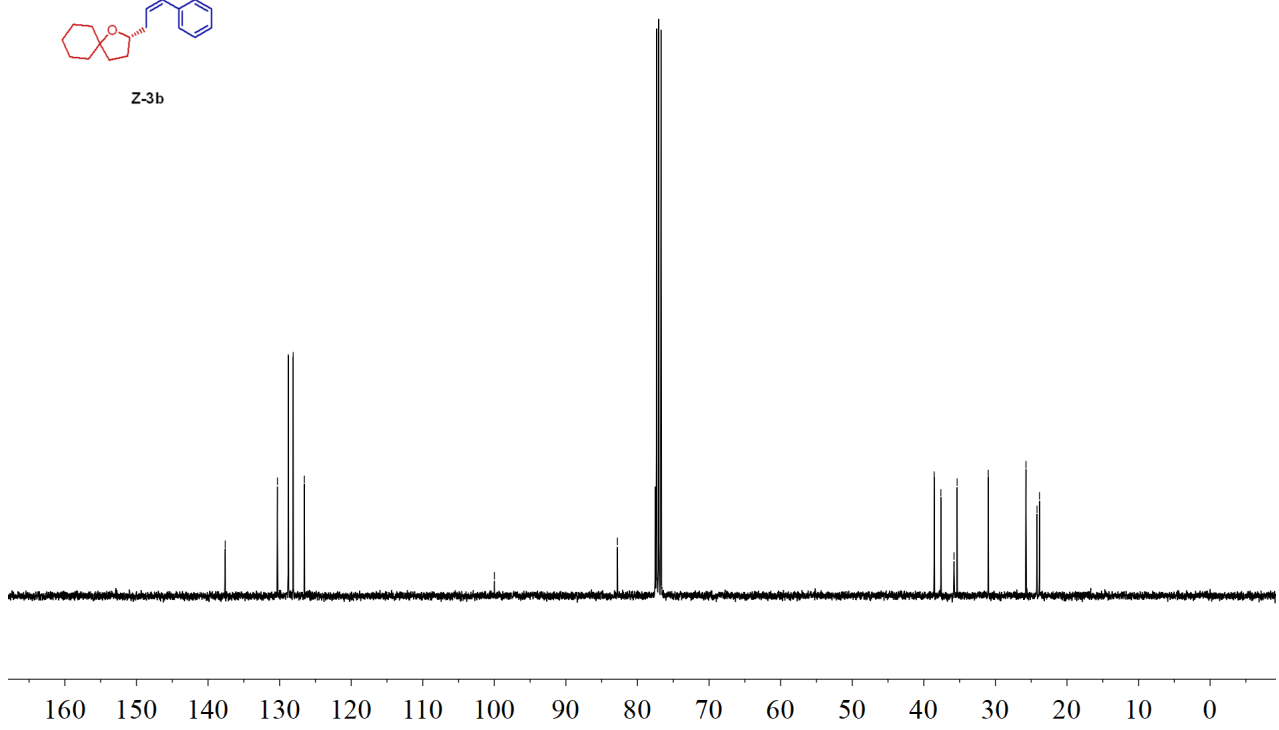



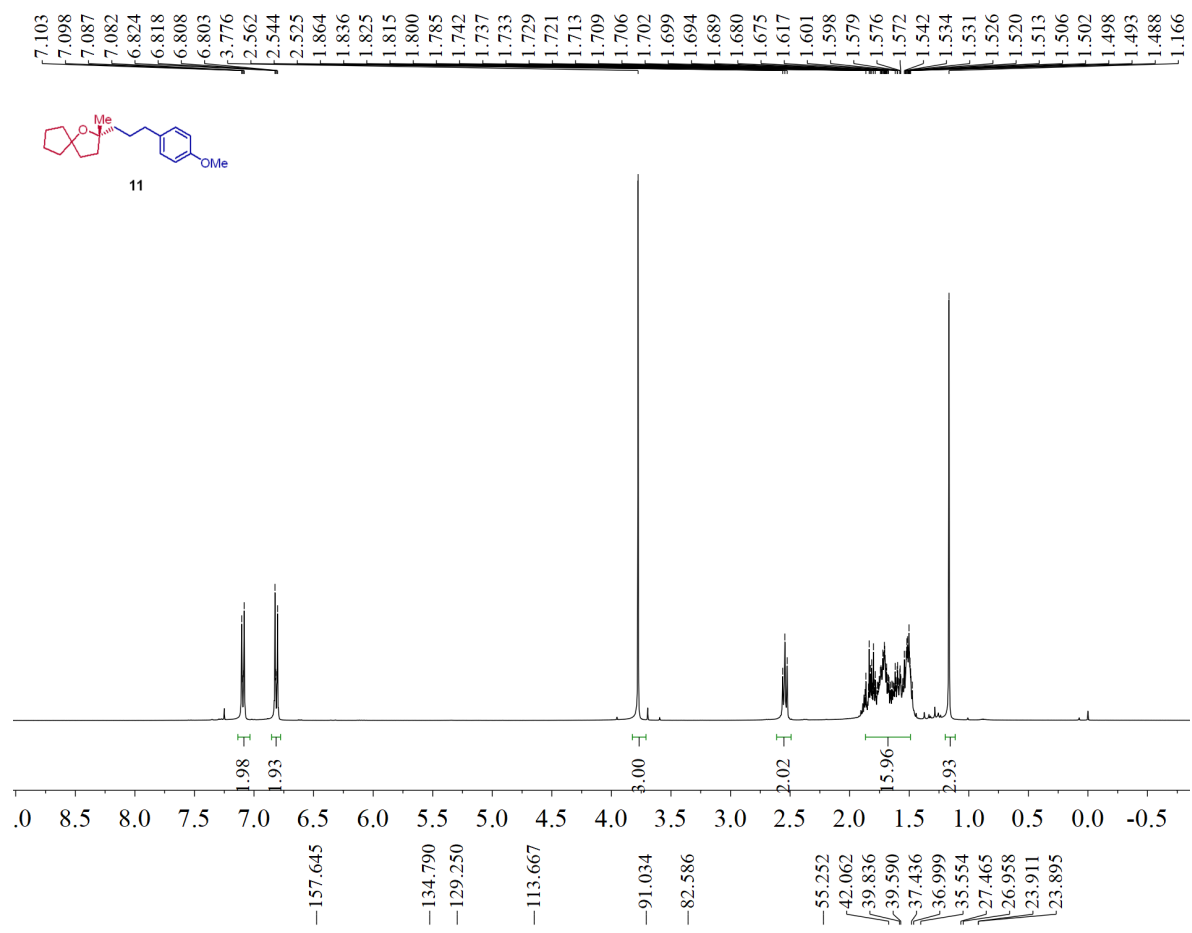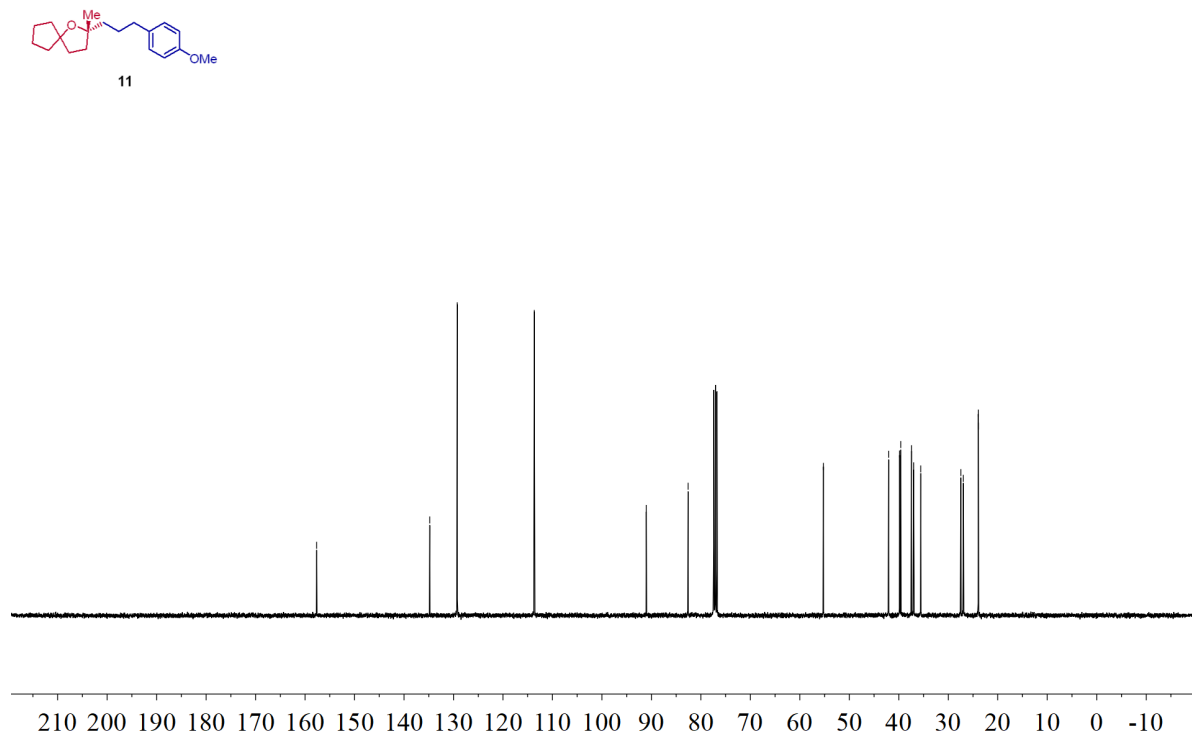

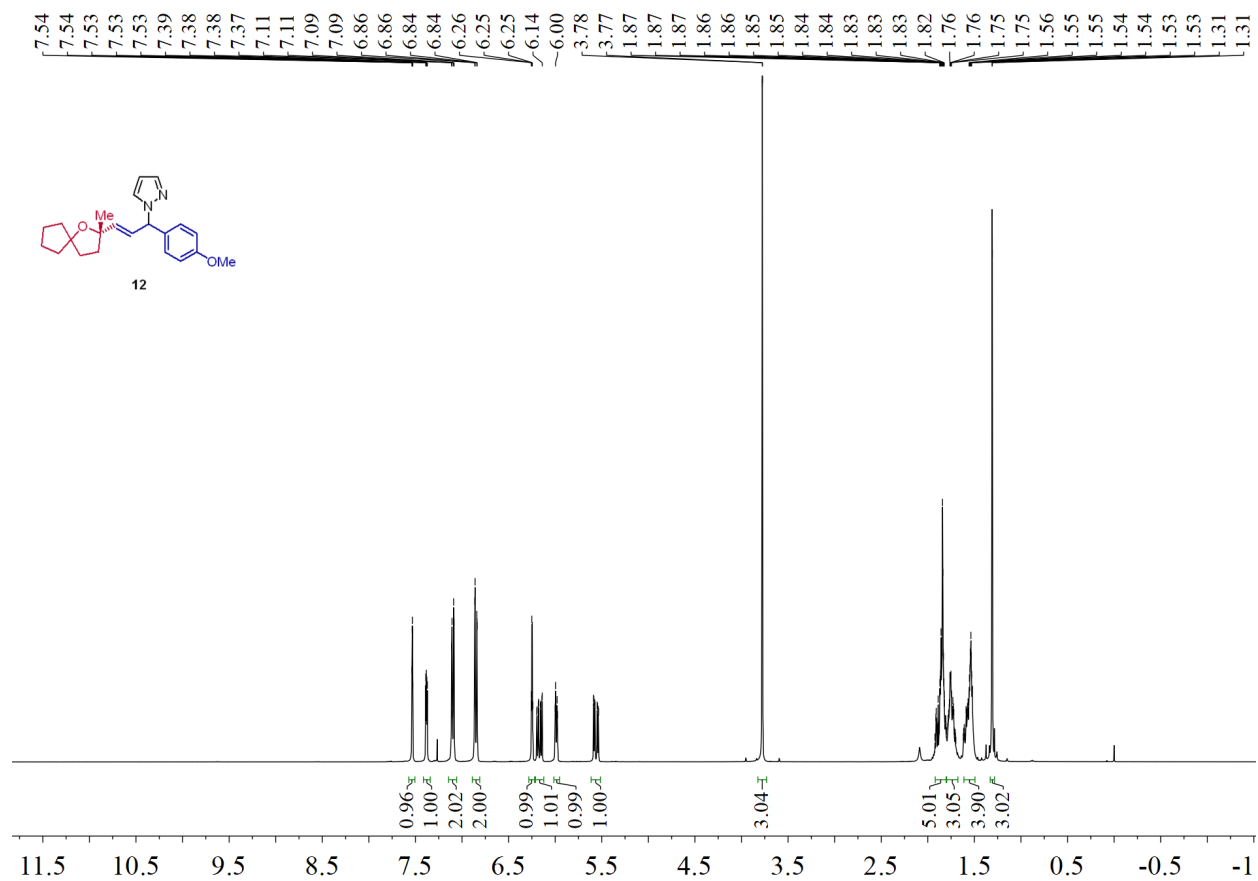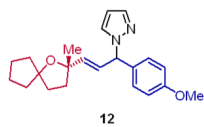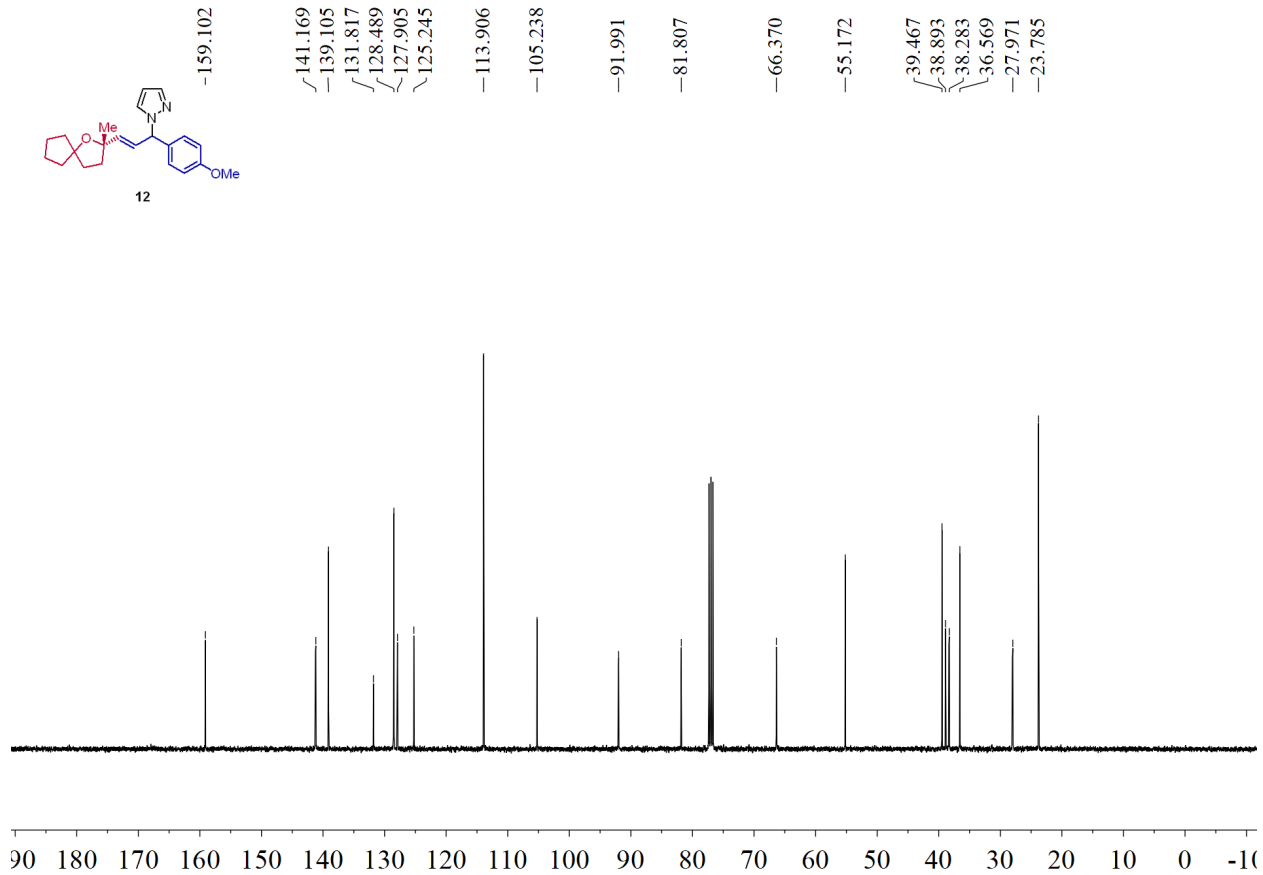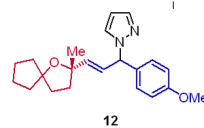

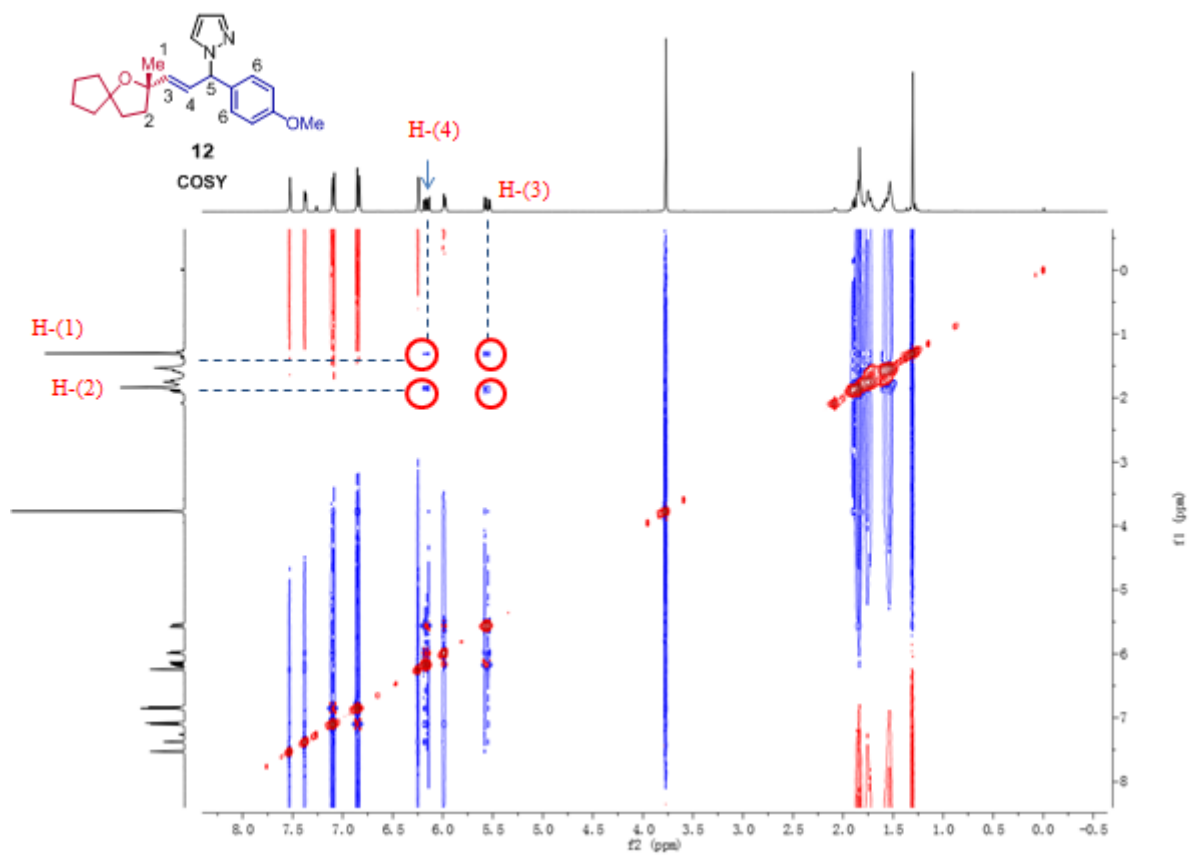

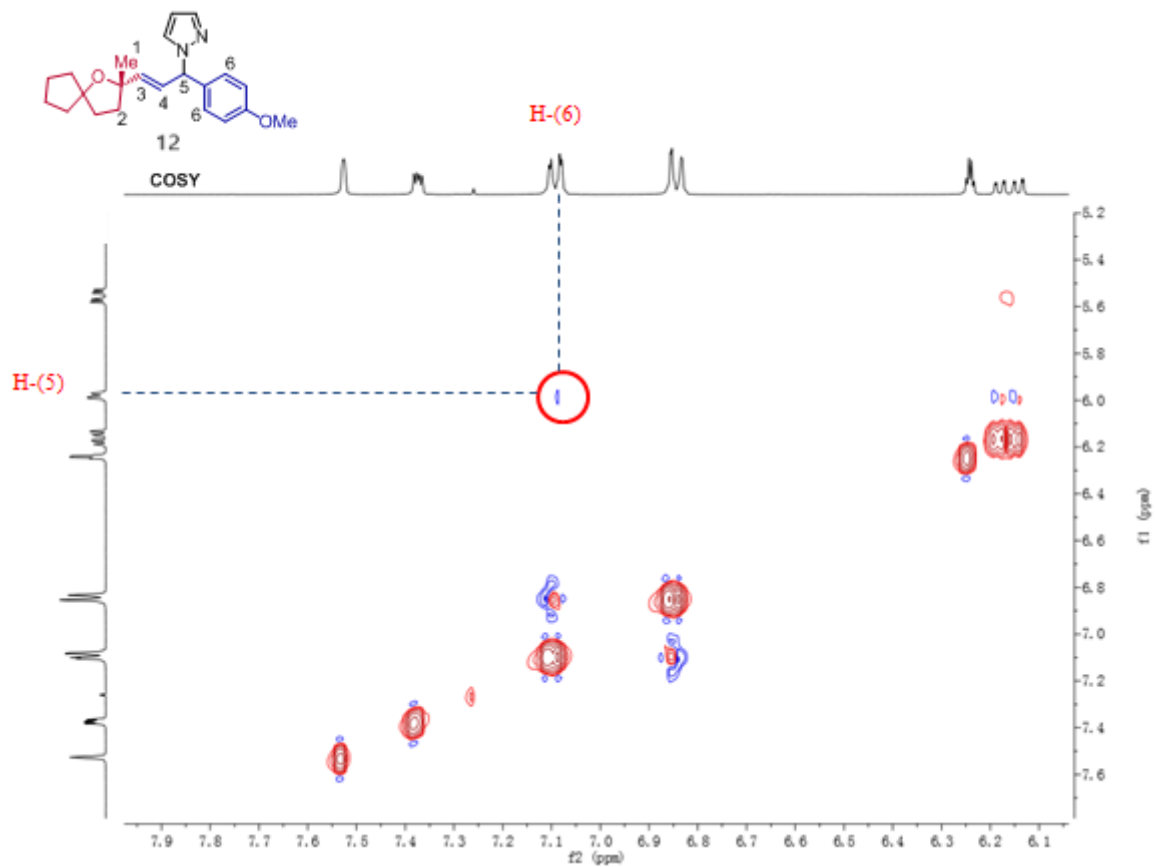

7.252  
7.145  
7.140  
7.129  
7.123  
6.782  
6.777  
6.766  
6.761  
6.325  
6.285  
6.064  
6.025  
2.404  
2.401  
2.389  
2.386  
2.382  
2.371  
2.367  
1.951  
1.935  
1.926  
1.921  
1.912  
1.906  
1.891  
1.886  
1.864  
1.859  
1.855  
1.849  
1.768  
1.758  
1.754  
1.748  
1.742  
1.737  
1.733  
1.729  
1.722  
1.626  
1.623  
1.606  
1.545  
1.536  
1.531  
1.528  
1.521  
1.273

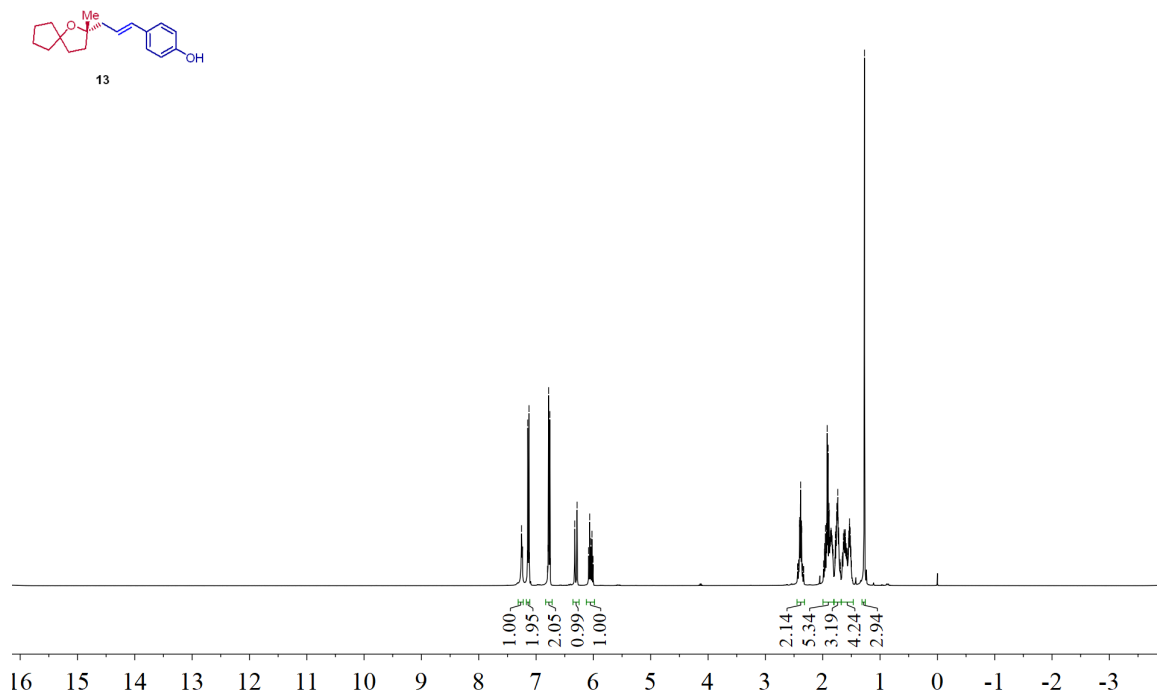

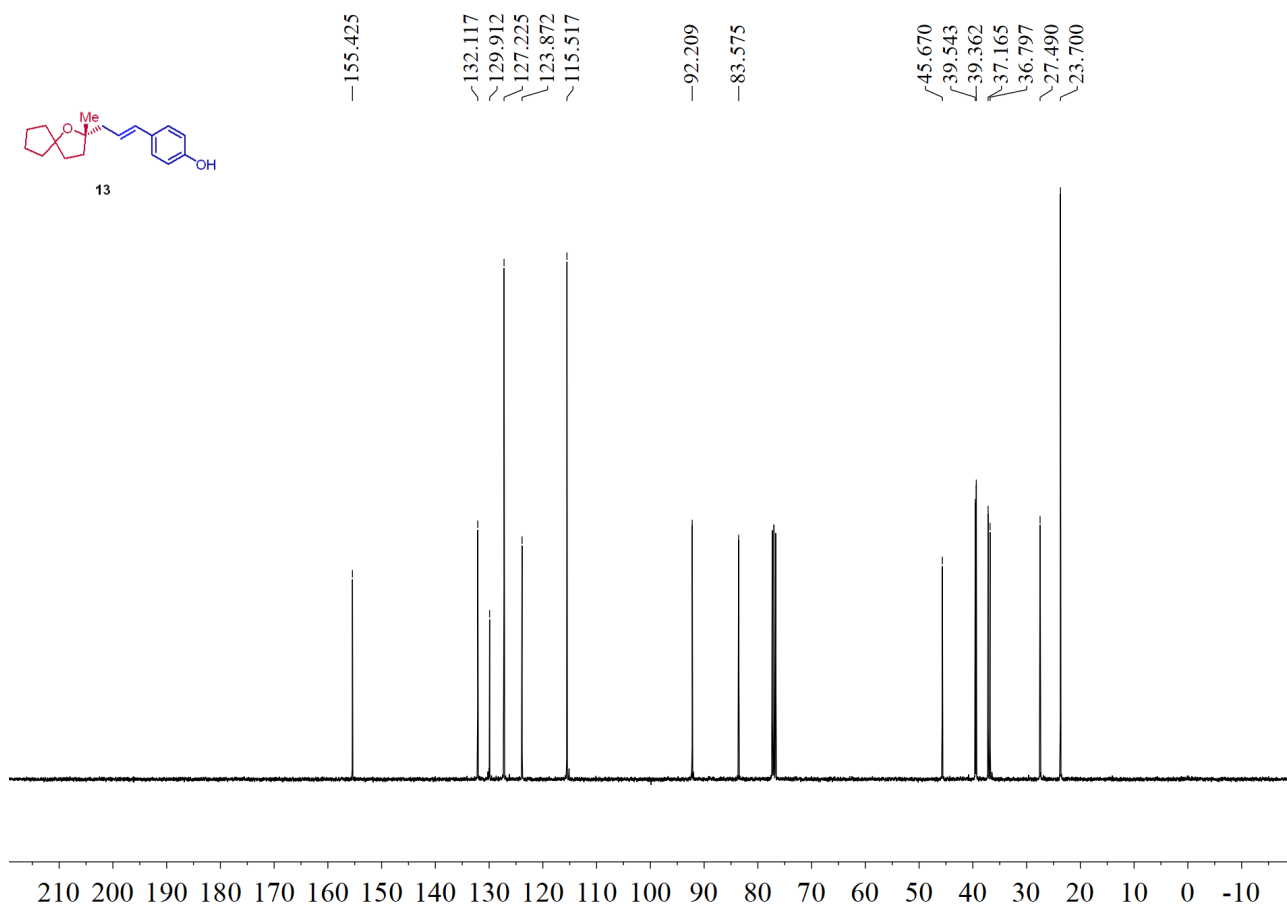

## 9. References

- Zhong, M., Jiang, Y., Chen, Y., Yan, Q., Liu, J. & Di, D. *Tetrahedron: Asymmetry* **26**, 1145-1149 (2015).
- Nishiyama, T., Woodhall, J. F., Lawson, E. N. & Kitching, W., *J. Org. Chem.* **54**, 2183-2189 (1989).
- Miao, L., Haque, I., Manzoni, M. R., Tham, W. S. & Chemler, S. R. *Org. Lett.* **12**, 4739 (2010).
- McCourt, R. O., Dénès, F., Sanchez-Sanz, G. & Scanlan, E. M. *Org. Lett.* **20**, 2948 (2018).
- Bhunya, R. Jana, N., Das, T. & Nanda, S. *Synlett* **8**, 1237 (2009).
- Escudero, J., Bellosta, V. & Cossy J. *Angew. Chem. Int. Ed.* **57**, 574 (2018).
- Dong, Y. & Breit, B. *Org. Lett.* **23**, 6765 (2021).
- Zhang, D. P., Fan, Y. J., Chen, H., Trpout, S. & Li, M.H. *Angew.Chem. Int. Ed.* **58**,10260 –10265 (2019).
- Tao, Y. Q., He, F. K., Jin, K. K., Wang, J. J., Wang, Y. Q., Zhou, J. F., Sun, J. & Fang, Q. *Polym. Chem.*, **8**, 2010–2015 (2017).
- Gaussian 09, Revision E.01, Frisch, M. J., Trucks, G. W., Schlegel, H. B., Scuseria, G. E., Robb, M. A., Cheeseman, J. R., Scalmani, G., Barone, V., Mennucci, B., Petersson, G. A., Na-katsuji, H., Caricato, M., Li, X., Hratchian, H. P., Izmaylov, A. F., Bloino, J., Zheng, G., Son-nenberg, J. L., Hada, M., Ehara, M., Toyota, K., Fukuda, R., Hasegawa, J., Ishida, M., Nakajima, T., Honda, Y., Kitao, Nakai, O.H., Vreven, T., Montgomery, J. A., Peralta, Jr., J. E., Ogliaro, F., Bearpark, M., Heyd, J. J., Brothers, E., Kudin, K. N., Staroverov, V. N., Keith, T., Kobayashi, R., Normand, J., Raghavachari, K., Rendell, A., Burant, J. C., Iyengar, S. S., Tomasi, J., Cossi, M., Rega, N., Millam, J. M., Klene, M., Knox, J. E., Cross, J. B., Bakken, V., Adamo, C., Jaramillo, J., Gomperts, R., Stratmann, R. E., Yazyev, O., Austin, A. J., Cammi, R., Pomelli, C., Ochterski, J. W., Martin, R. L., Morokuma, K., Zakrzewski, V. G., Voth, G. A., Salvador, P.,

- Dannenberg, J. J., Dapprich, S., Daniels, A. D., Farkas, O., Foresman, J. B., Ortiz, J. V., Cioslowski, J. & Fox, D. J., Gaussian, Inc., Wallingford CT, 2013.
11. Adamo, C. & Barone, V. Toward reliable density functional methods without adjustable parameters: The PBE0 model. *J. Chem. Phys.* **110**, 6158 (1999).
  12. Grimme, S., Antony, J., Ehrlich, S. & Krieg, H. A Consistent and Accurate Ab Initio Parametrization of Density Functional Dispersion Correction (DFT-D) for the 94 Elements H-Pu. *J. Chem. Phys.* **132**, 154104 (2010).
  13. Grimme, S., Ehrlich, S. & Goerigk, L. Effect of the Damping Function in Dispersion Corrected Density Functional Theory. *J. Comput. Chem.* **32**, 1456–1465 (2011).
  14. Dunning Jr., T. H. & Hay, P. J. in *Modern Theoretical Chemistry*, Ed. H. F. Schaefer III, Vol. 3 (Plenum, New York), **1977**, 1–28.
  15. Hariharan, P. C. & Pople, J. A. Accuracy of AH Nequilibrium Geometries by Single Determinant Molecular Orbital Theory. *Molecular Physics.* **27**, 209–214 (1974).
  16. Petersson, G. A., Bennett, A., Tensfeldt, T. G., Laham, A. I., M. A., Shirley, W. A. & Mantzaris, J. A Complete Basis Set Model Chemistry. I. the Total Energies of Closed-Shell Atoms and Hydrides of the First-Row Elements. *J. Chem. Phys.* **89**, 2193–2218 (1988).
  17. Gonzalez, C., Schlegel HBAn improved algorithm for reaction-path following. *J. Chem. Phys.* **90**, 2154–2161 (1989).
  18. Gonzalez, C., Schlegel HB Reaction-path following in massweighted internal coordinates. *J. Org. Chem.* **94**, 5523–5527 (1990).
  19. Weigend, F. & Ahlrichs, R. Balanced basis sets of split valence, triple zeta valence and quad-ruple zeta valence quality for H to Rn: Design and assessment of accuracy. *Phys. Chem. Chem. Phys.* **7**, 3297 (2005).
  20. Marenich, A. V., Christopher C. J. & Truhlar, D. G. Universal Solvation Model Based on Solute Electron Density and on a Continuum Model of the Solvent Defined by the Bulk Dielectric Constant and Atomic Surface Tensions. *J. Phys. Chem. B* **113**, 6378–6396 (2009).
  21. Humphrey, W., Dalke, A. & Schulten, K., 'VMD – Visual Molecular Dynamics', *J. Molec. Graphics.* **14.1**, 33-38 (1996).
  22. CYLview, 1.0b; Legault, C. Y., Université de Sherbrooke, 2009 (<http://www.cylview.org>)
  23. Stefan G., Exploration of Chemical Compound, Conformer, and Reaction Space with Meta-Dynamics Simulations Based on Tight-Binding Quantum Chemical Calculations. *J. Chem. Theory Comput.* **15**, 2847-2862 (2019).
  24. Tian Lu, Molclus program, Version 1.9, <http://www.keinsci.com/research/molclus.html> (accessed 3-24-2022).
  25. Becke, A. D. *J. Chem. Phys.* **98**, 5648-5652 (1993).
  26. Stephens, P. J., Devlin, F. J., Chabalowski, C. F. & Frisch, M. J. *J. Phys. Chem.* **98**, 11623-11627 (1994).
  27. Lee, C., Yang, W. & Parr, R. G. *Phys. Rev. B* **37**, 785-789 (1988).
  28. Lu, T. & Chen, F. *J. Comput. Chem.* **33**, 580 (2012).
  29. Mackenzie W. K., Christopher R. T., Ga Young Lee, Hannah J. E., K. N. Houk, and Marcey L. Waters. More Than  $\pi$ - $\pi$ - $\pi$  Stacking: Contribution of Amide- $\pi$  and CH- $\pi$  Interactions to Crotonyllysine Binding by the AF9 YEATS Domain. *J. Am. Chem. Soc.* **142**, 40, 17048–17056 (2020).
